# Supplementary material
Source: Research Square preprint supplement (doi:10.21203/rs.3.rs-9239215/v1)
Supplement: Supplementary file 1 [file 7d92292cf2fa5f659577bfd7.xlsx]

## Sheet: HYZ50
GeneID	Symbol	fpkmMean	log2FoldChange	pvalue	padj	regulated	HYZ50-Treatment-2 (FPKM)	HYZ50-Treatment-3 (FPKM)	HYZ50-Treatment-1 (FPKM)	HYZ50-Control-3 (FPKM)	HYZ50-Control-2 (FPKM)	HYZ50-Control-1 (FPKM)	HYZ50-Treatment-2 (Count)	HYZ50-Treatment-3 (Count)	HYZ50-Treatment-1 (Count)	HYZ50-Control-3 (Count)	HYZ50-Control-2 (Count)	HYZ50-Control-1 (Count)	go_id	go_class	go_description	KO_id	pathway_id	pathway_description	nr	pfam_id	pfam_description	swiss	eggNOG_group	eggNOG_class	eggNOG_function	COGID	COGName	COGFunctionalCategory	COGFunctionalCategoryDescription	KOGName	KOGFuncCode	KOGFuncCategories	KOGFuncDescription	TransFactor
BnaC06G0300500ZS	BnaC06G0300500ZS	3.68228	-3.57972	7.64689e-25	3.20519e-20	down	3.82748	3.3387	3.02242	54.3405	38.397	23.3665	116	89	71	1281	1189	635	GO:0070062;GO:2000171;GO:0045176;GO:0055037;GO:0000282;GO:0045197;GO:0098793;GO:0043066;GO:0031401;GO:0005759;GO:0012505;GO:1902953;GO:0098629;GO:0110039;GO:1903725;GO:0032011;GO:0000281;GO:0016477;GO:0048678;GO:0005769;GO:0120183;GO:0007030;GO:0033227;GO:0006897;GO:0005525;GO:0030838;GO:0010628;GO:0034394;GO:0015630;GO:0048749;GO:0010811;GO:1902824;GO:0005737;GO:0060996;GO:0036267;GO:0003729;GO:…	CC;BP;BP;CC;BP;BP;CC;BP;BP;CC;CC;BP;BP;BP;BP;BP;BP;BP;BP;CC;BP;BP;BP;BP;MF;BP;BP;BP;CC;BP;BP;BP;CC;BP;BP;MF;BP;BP;BP;BP;MF;BP;BP;CC;BP;BP;BP;CC;BP;BP;CC;BP;CC;BP;BP;BP;BP;CC;CC;MF;BP;CC;BP;CC;BP;CC;CC;BP;CC;BP;CC;BP;BP;CC;CC;CC;BP;BP;BP;BP;BP;BP;MF;CC;MF;BP;MF;MF;BP;CC;BP;BP;MF;CC;MF;BP;MF;BP;BP;BP;BP;CC;BP;BP;BP;BP;CC;BP;BP;BP;BP;BP;CC;BP;BP;BP;BP;MF;MF;BP;BP;BP;BP;CC;CC;BP;MF;CC;BP;CC;BP;CC;CC;…	extracellular exosome;negative regulation of dendrite development;apical protein localization;recycling endosome;cellular bud site selection;establishment or maintenance of epithelial cell apical/basal polarity;presynapse;negative regulation of apoptotic process;positive regulation of protein modification process;mitochondrial matrix;endomembrane system;positive regulation of ER to Golgi vesicle-…	K07937	ko04144	Endocytosis	ADP-ribosylation factor 2-B [Brassica napus]	PF00025.25	ADP-ribosylation factor family	ADP-ribosylation factor 2-B OS=Arabidopsis thaliana OX=3702 GN=ARF2-B PE=2 SV=1	37PTM	U	Belongs to the small GTPase superfamily. Arf family	COG1100	GTPase SAR1 family domain	R	General function prediction only	KOG0070	[U]	Intracellular trafficking, secretion, and vesicular transport;	GTP-binding ADP-ribosylation factor Arf1	-
MSTRG.7324.1	MSTRG.7324.1	2.18918	-12.3544	1.88602e-24	3.95264e-20	down	0	0	0	24.3148	20.4485	15.5681	0	0	0	968	1069	715	GO:1901362;GO:0044249;GO:0042469;GO:0047039;GO:0009507;GO:0042438;GO:0044550;GO:0008106;GO:0016614;GO:0016491;GO:1901576;GO:0045461;	BP;BP;MF;MF;CC;BP;BP;MF;MF;MF;BP;BP;	obsolete organic cyclic compound biosynthetic process;cellular biosynthetic process;versicolorin reductase activity;tetrahydroxynaphthalene reductase activity;chloroplast;melanin biosynthetic process;secondary metabolite biosynthetic process;alcohol dehydrogenase (NADP+) activity;oxidoreductase activity, acting on CH-OH group of donors;oxidoreductase activity;obsolete organic substance biosynthet…	-	bna01212;bna01100;bna00061;bna00780	Fatty acid metabolism;Metabolic pathways;Fatty acid biosynthesis;Biotin metabolism	NADPH-dependent aldehyde reductase-like protein, chloroplastic [Brassica napus]	PF13561.10	Enoyl-(Acyl carrier protein) reductase	NADPH-dependent aldehyde reductase-like protein, chloroplastic OS=Arabidopsis thaliana OX=3702 GN=At3g03980 PE=3 SV=1	3HZ4Z	Q	Enoyl-(Acyl carrier protein) reductase	COG1028	NAD(P)-dependent dehydrogenase, short-chain alcohol dehydrogenase family	I	Lipid transport and metabolism	KOG0725	[R]	General function prediction only;	Reductases with broad range of substrate specificities	-
BnaA09G0163700ZS	BnaA09G0163700ZS	1.9459	2.44578	8.42709e-23	1.1774e-18	up	5.89561	6.12352	6.72757	1.0706	1.22228	0.872547	318	291	281	46	68	43	GO:0003197;GO:0070062;GO:0003727;GO:0000245;GO:0030424;GO:1901001;GO:0031124;GO:0060090;GO:0009631;GO:0006397;GO:0003730;GO:0005840;GO:0003697;GO:1990904;GO:2000036;GO:0071004;GO:0045663;GO:0009451;GO:0001069;GO:0009651;GO:0003682;GO:0048255;GO:0009535;GO:2000738;GO:0043484;GO:0000976;GO:0098505;GO:0043204;GO:1990428;GO:0007369;GO:0005737;GO:0043488;GO:0045893;GO:0009909;GO:0003729;GO:1990830;GO:…	BP;CC;MF;BP;CC;BP;BP;MF;BP;BP;MF;CC;MF;CC;BP;CC;BP;BP;MF;BP;MF;BP;CC;BP;BP;MF;MF;CC;BP;BP;CC;BP;BP;BP;MF;BP;CC;BP;CC;CC;MF;BP;CC;MF;BP;CC;CC;BP;CC;CC;BP;BP;CC;BP;CC;CC;CC;CC;BP;CC;BP;BP;BP;MF;BP;BP;CC;BP;CC;MF;BP;BP;BP;CC;CC;BP;BP;BP;BP;CC;CC;BP;BP;BP;MF;BP;CC;MF;BP;MF;MF;BP;BP;CC;MF;BP;BP;CC;BP;CC;BP;MF;BP;BP;BP;BP;CC;MF;BP;CC;BP;MF;MF;BP;BP;CC;BP;BP;MF;BP;CC;BP;BP;BP;BP;BP;MF;BP;CC;CC;BP;CC;BP;…	endocardial cushion development;extracellular exosome;single-stranded RNA binding;spliceosomal complex assembly;axon;negative regulation of response to salt stress;mRNA 3'-end processing;molecular adaptor activity;cold acclimation;mRNA processing;mRNA 3'-UTR binding;ribosome;single-stranded DNA binding;ribonucleoprotein complex;regulation of stem cell population maintenance;U2-type prespliceosome…	-	ko03040	Spliceosome	splicing factor U2af large subunit B-like isoform X3 [Brassica napus]	PF00076.26	RNA recognition motif	Splicing factor U2af large subunit B OS=Arabidopsis thaliana OX=3702 GN=U2AF65B PE=1 SV=2	3HP90	A	U2 snRNP auxiliary factor large subunit	COG0724	RNA recognition motif (RRM) domain	J	Translation, ribosomal structure and biogenesis	KOG0120	[A]	RNA processing and modification;	Splicing factor U2AF, large subunit (RRM superfamily)	-
MSTRG.5694.2	MSTRG.5694.2	1.70141	-5.93809	2.94762e-22	3.08874e-18	down	0.139916	0.14356	0.248437	17.5889	2.5725	9.94787	27	24	37	2599	500	1695	-	-	-	-	-	-	uncharacterized protein LOC111199258 [Brassica napus]	PF03732.21	Retrotransposon gag protein	-	KOG0017	L	transposition, RNA-mediated	-	-	-	-	-	-	-	-	-
BnaA03G0002200ZS	BnaA03G0002200ZS	4.75408	2.95521	1.01836e-20	8.53692e-17	up	57.9428	78.8499	89.2969	6.47979	12.5566	7.9599	2779	3325	3313	244	620	345	GO:0070062;GO:0005506;GO:0019904;GO:0044754;GO:0007155;GO:0005634;GO:0009507;GO:0035578;GO:0008043;GO:0060088;GO:1905872;GO:0035024;GO:0005739;GO:0005759;GO:0009409;GO:0006826;GO:2001107;GO:2000114;GO:0045169;GO:0008198;GO:0045663;GO:1904234;GO:0007162;GO:0003723;GO:0006979;GO:0006935;GO:0071260;GO:0045184;GO:0008199;GO:0009535;GO:1903904;GO:1904231;GO:0090023;GO:0010043;GO:0051260;GO:0008284;GO:…	CC;MF;MF;CC;BP;CC;CC;CC;CC;BP;BP;BP;CC;CC;BP;BP;BP;BP;CC;MF;BP;BP;BP;MF;BP;BP;BP;BP;MF;CC;BP;BP;BP;BP;BP;BP;CC;MF;BP;CC;BP;BP;CC;CC;CC;BP;BP;BP;BP;BP;CC;MF;BP;BP;CC;BP;CC;BP;BP;BP;CC;CC;BP;CC;MF;CC;BP;CC;CC;CC;BP;BP;BP;BP;BP;CC;BP;BP;CC;BP;CC;BP;MF;	extracellular exosome;iron ion binding;protein domain specific binding;autolysosome;cell adhesion;nucleus;chloroplast;azurophil granule lumen;obsolete intracellular ferritin complex;auditory receptor cell stereocilium organization;negative regulation of protein localization to cell leading edge;negative regulation of Rho protein signal transduction;mitochondrion;mitochondrial matrix;response to c…	K00522	-	-	ferritin-1, chloroplastic [Brassica rapa]	PF00210.28	Ferritin-like domain	Ferritin-1, chloroplastic OS=Brassica napus OX=3708 GN=LSC30 PE=2 SV=1	3HSKU	P	Stores iron in a soluble, non-toxic, readily available form. Important for iron homeostasis. Iron is taken up in the ferrous form and deposited as ferric hydroxides after oxidation	COG1528	Ferritin	P	Inorganic ion transport and metabolism	KOG2332	[P]	Inorganic ion transport and metabolism;	Ferritin	-
BnaC05G0155300ZS	BnaC05G0155300ZS	4.21721	-1.76871	1.86876e-19	1.30549e-15	down	9.4826	10.0153	9.91543	35.0281	30.2418	28.1853	368	342	298	1064	1207	987	GO:0070483;GO:0005506;GO:0071456;GO:0001666;GO:0005634;GO:0018171;GO:0046872;GO:0047800;GO:0009061;GO:0005739;GO:0017172;GO:0005829;GO:0005737;	BP;MF;BP;BP;CC;BP;MF;MF;BP;CC;MF;CC;CC;	detection of hypoxia;iron ion binding;cellular response to hypoxia;response to hypoxia;nucleus;peptidyl-cysteine oxidation;metal ion binding;cysteamine dioxygenase activity;anaerobic respiration;mitochondrion;cysteine dioxygenase activity;cytosol;cytoplasm;	K23953	ko01100;ko00430	Metabolic pathways;Taurine and hypotaurine metabolism	plant cysteine oxidase 3 isoform X4 [Brassica napus]	PF07847.16	PCO_ADO	Plant cysteine oxidase 3 OS=Arabidopsis thaliana OX=3702 GN=PCO3 PE=1 SV=1	3HMMS	S	PCO_ADO	-	-	-	-	KOG4281	[S]	Function unknown;	Uncharacterized conserved protein	-
BnaA06G0157600ZS	BnaA06G0157600ZS	2.24014	1.71767	2.88968e-19	1.7303e-15	up	6.12741	6.58946	7.50373	1.79585	2.15769	1.73816	1097	1038	1040	252	398	281	GO:0032228;GO:0035331;GO:0008347;GO:0060090;GO:0043066;GO:1901524;GO:0048675;GO:0007032;GO:0050821;GO:0070646;GO:0090315;GO:0000124;GO:1901796;GO:1903955;GO:0016477;GO:0000281;GO:0009651;GO:0034644;GO:0005769;GO:0045742;GO:1904332;GO:0006897;GO:0060013;GO:0031453;GO:1990380;GO:0010628;GO:0021766;GO:0032731;GO:0140374;GO:0032880;GO:0043204;GO:0071549;GO:0005737;GO:0009267;GO:0005700;GO:0045893;GO:…	BP;BP;BP;MF;BP;BP;BP;BP;BP;BP;BP;CC;BP;BP;BP;BP;BP;BP;CC;BP;BP;BP;BP;BP;MF;BP;BP;BP;BP;BP;CC;BP;CC;BP;CC;BP;BP;BP;BP;BP;BP;BP;BP;BP;BP;BP;BP;BP;CC;CC;BP;MF;BP;MF;CC;MF;BP;BP;CC;BP;BP;BP;CC;CC;BP;BP;MF;CC;CC;BP;BP;BP;BP;CC;BP;MF;BP;CC;BP;MF;CC;CC;BP;BP;MF;BP;MF;MF;BP;BP;BP;BP;BP;BP;CC;BP;BP;BP;MF;MF;BP;MF;BP;MF;BP;BP;CC;BP;BP;BP;BP;MF;BP;CC;BP;BP;BP;BP;BP;CC;BP;CC;BP;MF;BP;BP;CC;CC;BP;BP;CC;BP;CC;…	regulation of synaptic transmission, GABAergic;negative regulation of hippo signaling;glial cell migration;molecular adaptor activity;negative regulation of apoptotic process;regulation of mitophagy;axon extension;endosome organization;protein stabilization;protein modification by small protein removal;negative regulation of protein targeting to membrane;SAGA complex;regulation of signal transduc…	K11858	-	-	ubiquitin carboxyl-terminal hydrolase 26 [Brassica napus]	PF00443.33	Ubiquitin carboxyl-terminal hydrolase	Ubiquitin carboxyl-terminal hydrolase 26 OS=Arabidopsis thaliana OX=3702 GN=UBP26 PE=1 SV=3	3HS4Y	O	Belongs to the peptidase C19 family	-	-	-	-	KOG1863	[O]	Posttranslational modification, protein turnover, chaperones;	Ubiquitin carboxyl-terminal hydrolase	-
BnaA09G0163900ZS	BnaA09G0163900ZS	1.19226	3.26197	6.07989e-19	3.18548e-15	up	3.56165	2.2745	3.493	0.23947	0.343129	0.274325	213	120	162	12	22	15	GO:0003197;GO:0070062;GO:0030424;GO:1901001;GO:0031124;GO:0060090;GO:0009631;GO:0006397;GO:0003730;GO:0005840;GO:0003697;GO:1990904;GO:2000036;GO:0071004;GO:0009451;GO:0045663;GO:0001069;GO:0009651;GO:0016477;GO:0003682;GO:0048255;GO:0009535;GO:2000738;GO:0043484;GO:0000976;GO:0098505;GO:0043204;GO:1990428;GO:0007369;GO:0005737;GO:0043488;GO:0045893;GO:0009909;GO:0043022;GO:0003729;GO:1990830;GO:…	BP;CC;CC;BP;BP;MF;BP;BP;MF;CC;MF;CC;BP;CC;BP;BP;MF;BP;BP;MF;BP;CC;BP;BP;MF;MF;CC;BP;BP;CC;BP;BP;BP;MF;MF;BP;CC;CC;CC;MF;BP;MF;BP;CC;CC;BP;CC;BP;CC;CC;BP;CC;BP;CC;BP;BP;BP;MF;BP;CC;BP;BP;CC;MF;BP;BP;BP;CC;CC;BP;BP;BP;CC;CC;BP;BP;BP;MF;BP;CC;BP;MF;MF;BP;BP;CC;MF;BP;BP;CC;BP;CC;MF;BP;BP;BP;CC;MF;BP;CC;BP;MF;BP;BP;CC;BP;BP;MF;BP;CC;BP;BP;BP;BP;CC;CC;BP;CC;BP;MF;BP;BP;BP;MF;BP;BP;CC;BP;BP;CC;MF;BP;CC;…	endocardial cushion development;extracellular exosome;axon;negative regulation of response to salt stress;mRNA 3'-end processing;molecular adaptor activity;cold acclimation;mRNA processing;mRNA 3'-UTR binding;ribosome;single-stranded DNA binding;ribonucleoprotein complex;regulation of stem cell population maintenance;U2-type prespliceosome;RNA modification;positive regulation of myoblast differen…	-	ko03040	Spliceosome	splicing factor U2af large subunit B-like isoform X4 [Brassica napus]	PF00076.26	RNA recognition motif	Splicing factor U2af large subunit B OS=Arabidopsis thaliana OX=3702 GN=U2AF65B PE=1 SV=2	3HP90	A	U2 snRNP auxiliary factor large subunit	COG0724	RNA recognition motif (RRM) domain	J	Translation, ribosomal structure and biogenesis	KOG0120	[A]	RNA processing and modification;	Splicing factor U2AF, large subunit (RRM superfamily)	-
BnaC06G0059900ZS	BnaC06G0059900ZS	1.58497	3.61682	9.02036e-19	4.20098e-15	up	3.57558	5.94396	7.18566	0.424087	0.579773	0.245948	222	324	345	21	37	14	GO:0042398;GO:0005634;GO:0010211;GO:0009089;GO:0010210;GO:0050118;GO:0006508;GO:0008237;GO:0009850;GO:0019877;GO:0016787;GO:0009753;GO:0046872;GO:0047980;GO:0010179;GO:0009694;GO:0010178;GO:0005794;GO:0005788;GO:0005783;GO:0009611;GO:0010112;GO:0004180;GO:0004046;GO:0004357;GO:1990206;GO:0005524;GO:0019344;	BP;CC;MF;BP;MF;MF;BP;MF;BP;BP;MF;BP;MF;MF;MF;BP;MF;CC;CC;CC;BP;BP;MF;MF;MF;MF;MF;BP;	cellular modified amino acid biosynthetic process;nucleus;IAA-Leu conjugate hydrolase activity;lysine biosynthetic process via diaminopimelate;IAA-Phe conjugate hydrolase activity;N-acetyldiaminopimelate deacetylase activity;proteolysis;metallopeptidase activity;auxin metabolic process;diaminopimelate biosynthetic process;hydrolase activity;response to jasmonic acid;metal ion binding;hippurate hy…	K21604	-	-	IAA-amino acid hydrolase ILR1-like 4 [Brassica napus]	PF01546.32	Peptidase family M20/M25/M40	IAA-amino acid hydrolase ILR1-like 4 OS=Arabidopsis thaliana OX=3702 GN=ILL4 PE=1 SV=2	3HS8A	S	IAA-amino acid hydrolase ILR1-like	COG1473	Metal-dependent amidase/aminoacylase/carboxypeptidase	R	General function prediction only	-	-	-	-	-
BnaA06G0167300ZS	BnaA06G0167300ZS	1.16402	4.93287	1.2144e-18	5.09015e-15	up	3.85982	4.33325	2.67337	0.083237	0.044973	0.174681	207	205	111	4	3	9	GO:0009723;GO:0005634;GO:0009536;GO:0042335;GO:0016788;GO:0000325;GO:0006952;GO:0048046;GO:0008152;GO:0016297;GO:0006631;GO:0099503;GO:0016042;GO:0010930;GO:0009871;GO:0009751;GO:0090406;GO:0009877;GO:0009620;GO:0005886;GO:0009570;GO:0009734;GO:0050832;GO:0033879;GO:0009753;GO:0009534;GO:0006581;GO:0016746;GO:0009866;GO:0004560;GO:0008299;GO:0009820;GO:0008126;GO:0098542;GO:0005829;GO:0005576;GO:…	BP;CC;CC;BP;MF;CC;BP;CC;BP;MF;BP;CC;BP;BP;BP;BP;CC;BP;BP;CC;CC;BP;BP;MF;BP;CC;BP;MF;BP;MF;BP;BP;MF;BP;CC;CC;CC;CC;CC;BP;MF;CC;CC;MF;BP;BP;CC;MF;MF;CC;MF;BP;MF;	response to ethylene;nucleus;plastid;cuticle development;hydrolase activity, acting on ester bonds;plant-type vacuole;defense response;apoplast;metabolic process;fatty acyl-[ACP] hydrolase activity;fatty acid metabolic process;secretory vesicle;lipid catabolic process;negative regulation of auxin mediated signaling pathway;jasmonic acid and ethylene-dependent systemic resistance, ethylene mediate…	-	-	-	GDSL esterase/lipase At3g48460-like [Brassica napus]	PF00657.26	GDSL-like Lipase/Acylhydrolase	GDSL esterase/lipase At3g48460 OS=Arabidopsis thaliana OX=3702 GN=At3g48460 PE=2 SV=1	3HTAS	S	Belongs to the 'GDSL' lipolytic enzyme family	COG3240	Phospholipase/lecithinase/hemolysin	IR	-	-	-	-	-	-
BnaC06G0404500ZS	BnaC06G0404500ZS	1.72079	4.3761	7.14302e-18	2.72181e-14	up	8.62659	6.53931	7.52297	0.301701	0.457846	0.092551	148	99	100	5	9	2	-	-	-	-	-	-	-	PF13275.10	S4 domain	-	-	-	-	-	-	-	-	-	-	-	-	-
MSTRG.13202.9	MSTRG.13202.9	0.67506	10.3205	2.2914e-17	8.00368e-14	up	1.77754	1.37299	1.51375	0	0	0	322	219	212	0	0	0	GO:0034644;GO:0002758;GO:0006952;GO:0005783;GO:0061809;GO:0050135;GO:0009733;GO:0010193;GO:0016887;GO:0009626;GO:0005789;GO:0030275;GO:0005524;GO:0043231;GO:0140376;GO:0034052;GO:0005886;GO:0002239;GO:0042742;GO:0005737;GO:0000166;GO:0009862;GO:0050832;GO:0000139;GO:0007165;GO:0002229;GO:0005634;GO:0043531;GO:0005829;GO:0005739;	BP;BP;BP;CC;MF;MF;BP;BP;MF;BP;CC;MF;MF;CC;MF;BP;CC;BP;BP;CC;MF;BP;BP;CC;BP;BP;CC;MF;CC;CC;	cellular response to UV;innate immune response-activating signaling pathway;defense response;endoplasmic reticulum;NAD+ nucleotidase, cyclic ADP-ribose generating;NADP+ nucleosidase activity;response to auxin;response to ozone;ATP hydrolysis activity;plant-type hypersensitive response;endoplasmic reticulum membrane;LRR domain binding;ATP binding;intracellular membrane-bounded organelle;innate imm…	-	-	-	disease resistance protein TAO1 isoform X1 [Brassica rapa]	PF01582.24	TIR domain	Probable disease resistance protein RPP1 OS=Arabidopsis thaliana OX=3702 GN=RPP1 PE=1 SV=1	3I234	S	Disease resistance protein (TIR-NBS-LRR class)	COG4886	Leucine-rich repeat (LRR) protein	K	Transcription	-	-	-	-	-
BnaC03G0221100ZS	BnaC03G0221100ZS	2.34633	-2.80537	1.14263e-16	3.68412e-13	down	1.37113	1.6272	1.41675	12.1023	11.1868	6.19413	49	52	40	339	411	200	-	-	-	-	-	-	uncharacterized protein LOC106409812 [Brassica napus]	PF16533.9	STIM1 Orai1-activating region	-	-	-	-	-	-	-	-	-	-	-	-	-
BnaA07G0067800ZS	BnaA07G0067800ZS	1.31252	-2.3186	1.35454e-16	4.05539e-13	down	0.517336	0.724934	0.586855	2.8321	2.71745	2.96801	68	84	60	291	367	352	GO:0051701;GO:0044857;GO:0034504;GO:0032368;GO:0008035;GO:0042632;GO:0090108;GO:0042157;GO:0140345;GO:0022857;GO:0015417;GO:0042599;GO:1903356;GO:0006672;GO:0030667;GO:0015594;GO:0097232;GO:0000166;GO:0005525;GO:0048545;GO:0070986;GO:0032585;GO:0055085;GO:0001750;GO:0005737;GO:0090452;GO:0033700;GO:0032367;GO:0030054;GO:0016323;GO:0097208;GO:0009410;GO:0016197;GO:0034188;GO:0120202;GO:0015914;GO:…	BP;BP;BP;BP;MF;BP;BP;BP;MF;MF;MF;CC;BP;BP;CC;MF;CC;MF;MF;BP;BP;CC;BP;CC;CC;BP;BP;BP;CC;CC;CC;BP;BP;MF;CC;BP;BP;BP;BP;BP;BP;BP;BP;MF;MF;BP;CC;BP;CC;BP;CC;BP;BP;MF;MF;MF;BP;BP;BP;BP;CC;CC;MF;BP;MF;BP;CC;BP;BP;BP;BP;BP;BP;CC;CC;CC;MF;BP;BP;BP;CC;BP;CC;MF;BP;BP;CC;BP;BP;CC;BP;BP;BP;MF;CC;MF;BP;BP;BP;MF;BP;BP;BP;BP;BP;BP;MF;MF;BP;BP;CC;MF;BP;BP;BP;BP;CC;MF;BP;MF;MF;CC;CC;MF;BP;BP;BP;BP;BP;CC;CC;MF;BP;…	biological process involved in interaction with host;plasma membrane raft organization;protein localization to nucleus;regulation of lipid transport;high-density lipoprotein particle binding;cholesterol homeostasis;positive regulation of high-density lipoprotein particle assembly;lipoprotein metabolic process;phosphatidylcholine flippase activity;transmembrane transporter activity;ABC-type polyam…	-	-	-	ABC transporter A family member 3-like [Brassica napus]	PF00005.31	ABC transporter	ABC transporter A family member 3 OS=Arabidopsis thaliana OX=3702 GN=ABCA3 PE=2 SV=3	3HWQ5	I	ABC transporter A family member	COG1131	ABC-type multidrug transport system, ATPase component	V	Defense mechanisms	KOG0059	[IR]	Lipid transport and metabolism; General function prediction only;	Lipid exporter ABCA1 and related proteins, ABC superfamily	-
BnaA06G0110000ZS	BnaA06G0110000ZS	2.8918	1.81414	6.15446e-16	1.71976e-12	up	13.2094	10.6933	12.693	3.21189	3.92532	2.54148	1056	752	785	201	323	184	GO:0015086;GO:0015093;GO:0000139;GO:0005770;GO:0006826;GO:0097577;GO:0030026;GO:2000022;GO:0005774;GO:0015341;GO:0009787;GO:0006882;GO:0009705;GO:0005886;GO:0005384;GO:0035618;GO:0046872;GO:0048316;GO:0010486;GO:0008324;GO:0010042;GO:0016020;GO:0009845;GO:0005794;GO:2000031;GO:0046688;GO:0071421;	MF;MF;CC;CC;BP;BP;BP;BP;CC;MF;BP;BP;CC;CC;MF;CC;MF;BP;MF;MF;BP;CC;BP;CC;BP;BP;BP;	cadmium ion transmembrane transporter activity;ferrous iron transmembrane transporter activity;Golgi membrane;late endosome;iron ion transport;sequestering of iron ion;intracellular manganese ion homeostasis;regulation of jasmonic acid mediated signaling pathway;vacuolar membrane;zinc efflux active transmembrane transporter activity;regulation of abscisic acid-activated signaling pathway;intracel…	-	-	-	metal tolerance protein 10-like [Brassica napus]	PF01545.25	Cation efflux family	Metal tolerance protein 10 OS=Arabidopsis thaliana OX=3702 GN=MTP10 PE=2 SV=1	3HW25	P	Cation efflux family protein	COG0053	Divalent metal cation (Fe/Co/Zn/Cd) efflux pump	P	Inorganic ion transport and metabolism	KOG1485	[P]	Inorganic ion transport and metabolism;	Mitochondrial Fe2+ transporter MMT1 and related transporters (cation diffusion facilitator superfamily)	-
MSTRG.93555.1	MSTRG.93555.1	1.39564	-2.44308	4.08715e-15	1.07071e-11	down	0.720432	0.699908	0.481634	3.7807	2.87791	3.12938	87	75	45	357	357	340	GO:0000325;GO:0016310;GO:0002758;GO:0006952;GO:0003700;GO:0004674;GO:0061809;GO:0050135;GO:0016887;GO:0009626;GO:0043565;GO:0005524;GO:0071456;GO:0042802;GO:0043531;GO:0009409;GO:0046872;GO:0042742;GO:0005737;GO:0007165;GO:0005634;GO:0009941;	CC;BP;BP;BP;MF;MF;MF;MF;MF;BP;MF;MF;BP;MF;MF;BP;MF;BP;CC;BP;CC;CC;	plant-type vacuole;phosphorylation;innate immune response-activating signaling pathway;defense response;DNA-binding transcription factor activity;protein serine/threonine kinase activity;NAD+ nucleotidase, cyclic ADP-ribose generating;NADP+ nucleosidase activity;ATP hydrolysis activity;plant-type hypersensitive response;sequence-specific DNA binding;ATP binding;cellular response to hypoxia;identi…	-	-	-	probable disease resistance protein At4g19520 [Brassica napus]	PF00931.26	NB-ARC domain	Protein DA1-related 4 OS=Arabidopsis thaliana OX=3702 GN=DAR4 PE=1 SV=2	-	-	-	-	-	-	-	-	-	-	-	-
MSTRG.51978.2	MSTRG.51978.2	0.572675	9.48365	1.30593e-14	3.21988e-11	up	1.34474	1.20705	1.09144	0	0	0	174	137	109	0	0	0	-	-	-	-	-	-	uncharacterized protein LOC106447816 [Brassica napus]	PF12874.11	Zinc-finger of C2H2 type	-	3GIN3	S	BEST Arabidopsis thaliana protein match is Calcium-binding EF hand family protein (TAIR AT1G64850.1)	-	-	-	-	-	-	-	-	-
BnaA09G0178300ZS	BnaA09G0178300ZS	1.35194	4.03185	1.70374e-14	3.96734e-11	up	4.36042	3.51789	5.18746	0.058742	0.432216	0.217283	366	260	337	4	38	17	GO:0070062;GO:0031667;GO:0070001;GO:0046686;GO:0070305;GO:0005769;GO:0051591;GO:0005159;GO:0000326;GO:1904724;GO:0005737;GO:0097208;GO:0009410;GO:0000425;GO:0043065;GO:0006914;GO:0005615;GO:0000324;GO:0043280;GO:0050435;GO:0032991;GO:0070492;GO:0009755;GO:0045335;GO:0045177;GO:1901143;GO:0016540;GO:0042756;GO:0042159;GO:0060561;GO:0010467;GO:0010033;GO:0042277;GO:0007586;GO:0002003;GO:0070201;GO:…	CC;BP;MF;BP;BP;CC;BP;MF;CC;CC;CC;CC;BP;BP;BP;BP;CC;CC;BP;BP;CC;MF;BP;CC;CC;BP;BP;BP;BP;BP;BP;BP;MF;BP;BP;BP;MF;CC;MF;CC;BP;BP;MF;BP;BP;BP;BP;CC;CC;BP;CC;CC;MF;CC;BP;BP;MF;CC;BP;BP;MF;CC;BP;BP;CC;CC;CC;BP;BP;MF;CC;BP;BP;BP;BP;CC;BP;BP;BP;BP;BP;BP;BP;BP;CC;CC;CC;CC;CC;BP;BP;CC;CC;BP;CC;MF;BP;CC;CC;BP;CC;CC;CC;	extracellular exosome;response to nutrient levels;aspartic-type peptidase activity;response to cadmium ion;response to cGMP;early endosome;response to cAMP;insulin-like growth factor receptor binding;protein storage vacuole;tertiary granule lumen;cytoplasm;alveolar lamellar body;response to xenobiotic stimulus;pexophagy;positive regulation of apoptotic process;autophagy;extracellular space;fungal…	K08245	-	-	aspartic proteinase oryzasin-1-like [Brassica napus]	PF00026.27	Eukaryotic aspartyl protease	Aspartic proteinase A1 OS=Arabidopsis thaliana OX=3702 GN=APA1 PE=1 SV=1	3HZ7X	O	Saposin (B) Domains	-	-	-	-	KOG1339	[O]	Posttranslational modification, protein turnover, chaperones;	Aspartyl protease	-
BnaA02G0220200ZS	BnaA02G0220200ZS	1.72974	-6.07035	1.29256e-13	2.85145e-10	down	0	0.167436	0.277856	3.71678	14.0864	11.5394	0	3	4	50	248	178	-	-	-	-	-	-	UPF0725 protein At2g20620-like [Brassica napus]	PF04776.16	Protein MS5	UPF0725 protein At2g20620 OS=Arabidopsis thaliana OX=3702 GN=At2g20620 PE=2 SV=1	-	-	-	-	-	-	-	-	-	-	-	-
BnaA09G0163800ZS	BnaA09G0163800ZS	1.40169	9.07156	2.86435e-13	5.78799e-10	up	4.89764	5.23781	8.2469	0	0	0	96	91	125	0	0	0	-	-	-	-	ko03040	Spliceosome	splicing factor U2af large subunit B-like isoform X4 [Brassica napus]	PF02724.18	CDC45-like protein	-	3HP90	A	U2 snRNP auxiliary factor large subunit	-	-	-	-	-	-	-	-	-
MSTRG.83617.27	MSTRG.83617.27	0.260553	9.15889	2.89987e-13	5.78799e-10	up	0.290022	0.468295	0.560253	0	0	0	84	119	125	0	0	0	GO:0003677;GO:0005737;GO:0006508;GO:0006310;GO:0015074;GO:0003723;GO:0004190;GO:0003887;GO:0005634;GO:0004519;GO:0046872;GO:0003964;	MF;CC;BP;BP;BP;MF;MF;MF;CC;MF;MF;MF;	DNA binding;cytoplasm;proteolysis;DNA recombination;DNA integration;RNA binding;aspartic-type endopeptidase activity;DNA-directed DNA polymerase activity;nucleus;endonuclease activity;metal ion binding;RNA-directed DNA polymerase activity;	-	-	-	uncharacterized protein LOC114580023 [Dendrobium catenatum]	PF00078.31	Reverse transcriptase (RNA-dependent DNA polymerase)	Transposon Tf2-6 polyprotein OS=Schizosaccharomyces pombe (strain 972 / ATCC 24843) OX=284812 GN=Tf2-6 PE=3 SV=1	3HXPF	I	3-hydroxyisobutyryl-CoA hydrolase activity	-	-	-	-	KOG0016	[I]	Lipid transport and metabolism;	Enoyl-CoA hydratase/isomerase	-
MSTRG.98687.14	MSTRG.98687.14	0.543622	-9.28535	1.00706e-12	1.91867e-09	down	0	0	0	1.92096	0.645049	0.996066	0	0	0	154	68	92	-	-	-	-	-	-	uncharacterized protein LOC106427810 isoform X1 [Brassica napus]	PF12776.11	Myb/SANT-like DNA-binding domain	UPF0725 protein At2g20625 OS=Arabidopsis thaliana OX=3702 GN=At2g20625 PE=3 SV=1	KOG4585	B	nuclease activity	-	-	-	-	KOG4585	[L]	Replication, recombination and repair;	Predicted transposase	-
MSTRG.41098.7	MSTRG.41098.7	1.22799	2.57945	1.23225e-12	2.24565e-09	up	2.73421	2.79743	2.97552	0.604229	0.255918	0.454339	322	289	271	56	31	49	GO:0003713;GO:0006310;GO:0003723;GO:1990466;GO:0003712;GO:0003677;GO:0000785;GO:0016925;GO:0009791;GO:0046983;GO:0001917;GO:0006355;GO:0043565;GO:0031965;GO:1990837;GO:0019789;GO:0000976;GO:0042802;GO:0061665;GO:0000978;GO:0044828;GO:0045944;GO:0001228;GO:0046872;GO:0000981;GO:0005737;GO:0032196;GO:0005654;GO:0000977;GO:0006357;GO:0005634;GO:0016605;GO:0005829;GO:0005813;	MF;BP;MF;BP;MF;MF;CC;BP;BP;MF;CC;BP;MF;CC;MF;MF;MF;MF;MF;MF;BP;BP;MF;MF;MF;CC;BP;CC;MF;BP;CC;CC;CC;CC;	transcription coactivator activity;DNA recombination;RNA binding;protein autosumoylation;transcription coregulator activity;DNA binding;chromatin;protein sumoylation;post-embryonic development;protein dimerization activity;photoreceptor inner segment;regulation of DNA-templated transcription;sequence-specific DNA binding;nuclear membrane;sequence-specific double-stranded DNA binding;SUMO transfer…	-	-	-	PREDICTED: zinc finger BED domain-containing protein RICESLEEPER 2-like [Brassica oleracea var. oleracea]	PF14372.10	hAT-like transposase, RNase-H fold	Zinc finger BED domain-containing protein RICESLEEPER 2 OS=Oryza sativa subsp. japonica OX=39947 GN=Os03g0733400 PE=2 SV=1	3HY9E	L	Zinc finger BED domain-containing protein	-	-	-	-	KOG1121	[L]	Replication, recombination and repair;	Tam3-transposase (Ac family)	-
MSTRG.80558.2	MSTRG.80558.2	0.438818	9.21801	1.75895e-12	3.07194e-09	up	0.895786	0.360016	1.40575	0	0	0	137	49	166	0	0	0	-	-	-	-	-	-	uncharacterized protein LOC108856208 [Raphanus sativus]	-	-	-	-	-	-	-	-	-	-	-	-	-	-	-
BnaC06G0075600ZS	BnaC06G0075600ZS	4.84307	2.48955	2.15311e-12	3.6099e-09	up	80.4792	80.653	43.0381	10.6295	13.3144	10.4623	2016	1777	835	209	344	237	GO:0009723;GO:0009415;GO:0042335;GO:0009880;GO:0006952;GO:0071369;GO:0048825;GO:0009651;GO:0071456;GO:0001666;GO:1900036;GO:0009739;GO:0000976;GO:0009620;GO:0034605;GO:0005737;GO:0009864;GO:0045893;GO:0009753;GO:0031347;GO:0009835;GO:0010143;GO:0010166;GO:0008219;GO:0048510;GO:0010104;GO:0009408;GO:0051726;GO:0010030;GO:0009788;GO:0009735;GO:0009409;GO:0035865;GO:0045595;GO:0009877;GO:0050832;GO:…	BP;BP;BP;BP;BP;BP;BP;BP;BP;BP;BP;BP;MF;BP;BP;CC;BP;BP;BP;BP;BP;BP;BP;BP;BP;BP;BP;BP;BP;BP;BP;BP;BP;BP;BP;BP;MF;BP;BP;BP;BP;MF;MF;BP;BP;BP;BP;BP;BP;CC;BP;BP;BP;BP;BP;BP;BP;BP;BP;BP;BP;BP;BP;BP;BP;BP;BP;BP;CC;BP;BP;BP;BP;BP;BP;BP;BP;BP;BP;BP;BP;BP;MF;CC;BP;BP;BP;BP;BP;BP;MF;BP;BP;BP;BP;CC;BP;BP;BP;BP;BP;BP;BP;BP;	response to ethylene;response to water;cuticle development;embryonic pattern specification;defense response;cellular response to ethylene stimulus;cotyledon development;response to salt stress;cellular response to hypoxia;response to hypoxia;positive regulation of cellular response to heat;response to gibberellin;transcription cis-regulatory region binding;response to fungus;cellular response to …	K09286	-	-	ethylene-responsive transcription factor 4 [Brassica napus]	PF00847.24	AP2 domain	Ethylene-responsive transcription factor 4 OS=Arabidopsis thaliana OX=3702 GN=ERF4 PE=1 SV=1	3HUA7	K	transcription factor	-	-	-	-	-	-	-	-	AP2/ERF-ERF
BnaC07G0495700ZS	BnaC07G0495700ZS	5.96281	-2.05001	3.04144e-12	4.90316e-09	down	24.3489	39.8667	30.1111	125.877	109.577	129.201	965	1389	923	3904	4465	4620	GO:0042545;GO:0010154;GO:0000272;GO:0071365;GO:0051301;GO:0070726;GO:0048573;GO:0009612;GO:0030445;GO:0045493;GO:0006037;GO:0048046;GO:0009664;GO:0071370;GO:0005739;GO:0009409;GO:0042546;GO:2000899;GO:0009831;GO:0009645;GO:0099503;GO:0080086;GO:0071456;GO:0030243;GO:0004553;GO:0016762;GO:0016810;GO:0010218;GO:0009986;GO:0005886;GO:0009832;GO:0016998;GO:0005737;GO:0009733;GO:0080022;GO:0010087;GO:…	BP;BP;BP;BP;BP;BP;BP;BP;CC;BP;BP;CC;BP;BP;CC;BP;BP;BP;BP;BP;CC;BP;BP;BP;MF;MF;MF;BP;CC;CC;BP;BP;CC;BP;BP;BP;MF;MF;BP;MF;BP;CC;CC;BP;BP;CC;CC;BP;BP;CC;CC;CC;CC;CC;CC;MF;MF;BP;BP;BP;BP;BP;BP;CC;BP;CC;BP;MF;	cell wall modification;fruit development;polysaccharide catabolic process;cellular response to auxin stimulus;cell division;cell wall assembly;photoperiodism, flowering;response to mechanical stimulus;yeast-form cell wall;xylan catabolic process;obsolete cell wall chitin metabolic process;apoplast;plant-type cell wall organization;cellular response to gibberellin stimulus;mitochondrion;response t…	K08235	-	-	probable xyloglucan endotransglucosylase/hydrolase protein 18 [Brassica napus]	PF00722.25	Glycosyl hydrolases family 16	Probable xyloglucan endotransglucosylase/hydrolase protein 18 OS=Arabidopsis thaliana OX=3702 GN=XTH18 PE=2 SV=1	3HWGR	G	Catalyzes xyloglucan endohydrolysis (XEH) and or endotransglycosylation (XET). Cleaves and religates xyloglucan polymers, an essential constituent of the primary cell wall, and thereby participates in cell wall construction of growing tissues	COG2273	Beta-glucanase, GH16 family	G	Carbohydrate transport and metabolism	-	-	-	-	-
BnaC06G0011400ZS	BnaC06G0011400ZS	4.33668	1.26277	5.10741e-12	7.92879e-09	up	32.2227	29.3126	30.6201	11.9835	12.1419	11.5242	1272	1018	935	371	493	411	-	-	-	-	-	-	uncharacterized protein BNAC06G00750D isoform X2 [Brassica napus]	-	-	-	3HMU6	S	isoform X1	-	-	-	-	-	-	-	-	-
BnaA04G0281400ZS	BnaA04G0281400ZS	2.74861	-1.98593	5.42204e-12	8.1166e-09	down	2.23564	3.37929	3.09694	12.5539	9.60539	10.0425	77	102	83	338	339	311	GO:0016020;GO:0055046;GO:0046872;GO:0002240;GO:0009561;GO:0009617;GO:0002237;GO:0005771;GO:0002238;	CC;BP;MF;BP;BP;BP;BP;CC;BP;	membrane;microgametogenesis;metal ion binding;response to molecule of oomycetes origin;megagametogenesis;response to bacterium;response to molecule of bacterial origin;multivesicular body;response to molecule of fungal origin;	-	-	-	uncharacterized protein LOC103866134 [Brassica rapa]	PF03107.20	C1 domain	Protein VACUOLELESS GAMETOPHYTES OS=Arabidopsis thaliana OX=3702 GN=VLG PE=1 SV=1	3GIHH	S	Cysteine Histidine-rich C1 domain family protein	-	-	-	-	-	-	-	-	-
MSTRG.70581.14	MSTRG.70581.14	0.852136	-3.51555	1.08791e-11	1.5724e-08	down	0.045866	0.263636	0.182124	1.99256	2.01676	1.45338	4	17	10	110	146	93	-	-	-	-	-	-	uncharacterized protein AT1G26255 [Arabidopsis thaliana]	PF14938.10	Soluble NSF attachment protein, SNAP	-	3GRP2	-	-	-	-	-	-	-	-	-	-	-
BnaA07G0039600ZS	BnaA07G0039600ZS	1.05078	-4.30886	1.63055e-11	2.27815e-08	down	0.113148	0.179175	0.15091	1.3562	4.93243	2.74346	5	6	5	40	188	92	-	-	-	-	-	-	uncharacterized protein LOC106406988 isoform X1 [Brassica napus]	-	-	-	-	-	-	-	-	-	-	-	-	-	-	-
MSTRG.100321.1	MSTRG.100321.1	0.49144	8.63855	3.30858e-11	4.44548e-08	up	0.510875	1.06392	1.47576	0	0	0	45	82	100	0	0	0	-	-	-	-	-	-	uncharacterized protein LOC106379941 isoform X2 [Brassica napus]	PF03384.18	Drosophila protein of unknown function, DUF287	-	-	-	-	-	-	-	-	-	-	-	-	-
BnaC05G0185800ZS	BnaC05G0185800ZS	1.72736	-3.91296	3.3939e-11	4.44548e-08	down	0.447726	0.569216	0.377407	5.19748	5.2247	9.91824	6	7	4	53	70	117	-	-	-	-	-	-	PREDICTED: L-type lectin-domain containing receptor kinase I.7-like [Brassica oleracea var. oleracea]	-	-	-	2SGDU	-	-	-	-	-	-	-	-	-	-	-
MSTRG.42276.1	MSTRG.42276.1	1.35494	4.90456	3.75236e-11	4.76607e-08	up	5.33066	4.97865	4.13725	0	0.097064	0.312967	383	315	230	0	8	21	GO:0070050;GO:0070628;GO:0032091;GO:0032781;GO:1903644;GO:0009408;GO:0036503;GO:0031593;GO:0043161;GO:0140297;GO:0050821;GO:0031625;GO:0030018;GO:0006986;GO:0032880;GO:0030308;GO:0051085;GO:0061077;GO:0031396;GO:0005789;GO:0031965;GO:0042026;GO:0006457;GO:0016234;GO:0043130;GO:0005886;GO:0098554;GO:0032436;GO:0051087;GO:0140036;GO:0090084;GO:0090086;GO:0005737;GO:0042691;GO:0051082;GO:0030433;GO:…	BP;MF;BP;BP;BP;BP;BP;MF;BP;MF;BP;MF;CC;BP;BP;BP;BP;BP;BP;CC;CC;BP;BP;CC;MF;CC;CC;BP;MF;MF;BP;BP;CC;BP;MF;BP;BP;BP;CC;BP;CC;MF;CC;CC;MF;CC;	neuron cellular homeostasis;proteasome binding;negative regulation of protein binding;positive regulation of ATP-dependent activity;regulation of chaperone-mediated protein folding;response to heat;ERAD pathway;polyubiquitin modification-dependent protein binding;proteasome-mediated ubiquitin-dependent protein catabolic process;DNA-binding transcription factor binding;protein stabilization;ubiqui…	-	-	-	dnaJ homolog subfamily B member 1 [Brassica napus]	PF00226.35	DnaJ domain	DnaJ homolog subfamily B member 2 OS=Homo sapiens OX=9606 GN=DNAJB2 PE=1 SV=3	3HVHM	O	Contains the following InterPro domains Molecular chaperone, heat shock protein, Hsp40, DnaJ (InterPro IPR015609), HSP40 DnaJ peptide-binding (InterPro IPR008971), Chaperone DnaJ, C-terminal (InterPro IPR002939), Heat shock protein DnaJ, N-terminal (InterPro IPR001623), Heat shock protein DnaJ (InterPro IPR003095), Heat shock protein DnaJ, conserved site (InterPro IPR018253)	COG0484	DnaJ-class molecular chaperone with C-terminal Zn finger domain	O	Posttranslational modification, protein turnover, chaperones	KOG0714	[O]	Posttranslational modification, protein turnover, chaperones;	Molecular chaperone (DnaJ superfamily)	-
BnaA05G0488000ZS	BnaA05G0488000ZS	1.79568	-1.42747	4.41068e-11	5.43745e-08	down	1.45389	1.45137	1.67097	3.42501	3.81388	4.11664	275	242	245	507	742	703	GO:0010192;GO:0048367;GO:0043621;GO:0042538;GO:0005634;GO:0009507;GO:0000139;GO:0006952;GO:0005739;GO:0042546;GO:0009409;GO:0030244;GO:0051753;GO:0046527;GO:0005802;GO:0009825;GO:0035438;GO:0009651;GO:0005768;GO:0009846;GO:0006970;GO:0042803;GO:0006011;GO:0005886;GO:0009832;GO:0016759;GO:0050832;GO:0043622;GO:0010330;GO:0010214;GO:0046872;GO:0042802;GO:0031150;GO:0005829;GO:0071555;GO:0010400;GO:…	BP;BP;MF;BP;CC;CC;CC;BP;CC;BP;BP;BP;MF;MF;CC;BP;MF;BP;CC;BP;BP;MF;BP;CC;BP;MF;BP;BP;CC;BP;MF;MF;BP;CC;BP;BP;BP;CC;MF;BP;BP;MF;CC;CC;BP;BP;BP;BP;BP;CC;CC;BP;	mucilage biosynthetic process;shoot system development;obsolete protein self-association;hyperosmotic salinity response;nucleus;chloroplast;Golgi membrane;defense response;mitochondrion;cell wall biogenesis;response to cold;cellulose biosynthetic process;mannan synthase activity;glucosyltransferase activity;trans-Golgi network;multidimensional cell growth;cyclic-di-GMP binding;response to salt st…	K20924	-	-	cellulose synthase-like protein D3 [Brassica rapa]	PF03552.18	Cellulose synthase	Cellulose synthase-like protein D3 OS=Arabidopsis thaliana OX=3702 GN=CSLD3 PE=1 SV=1	3HZPH	G	Belongs to the glycosyltransferase 2 family	COG1215	Glycosyltransferase, catalytic subunit of cellulose synthase and poly-beta-1,6-N-acetylglucosamine synthase	N	Cell motility	-	-	-	-	-
BnaA03G0517100ZS	BnaA03G0517100ZS	2.52083	-2.66201	5.71473e-11	6.8438e-08	down	1.39692	2.34692	1.87385	15.2648	6.78158	11.2462	56	82	58	474	277	403	GO:0042545;GO:0010154;GO:0000272;GO:0071365;GO:0051301;GO:0070726;GO:0048573;GO:0009612;GO:0030445;GO:0045493;GO:0006037;GO:0048046;GO:0009664;GO:0071370;GO:0005739;GO:0009409;GO:0042546;GO:2000899;GO:0009831;GO:0009645;GO:0099503;GO:0080086;GO:0071456;GO:0030243;GO:0004553;GO:0016762;GO:0016810;GO:0010218;GO:0009986;GO:0005886;GO:0009832;GO:0016998;GO:0005737;GO:0009733;GO:0080022;GO:0010087;GO:…	BP;BP;BP;BP;BP;BP;BP;BP;CC;BP;BP;CC;BP;BP;CC;BP;BP;BP;BP;BP;CC;BP;BP;BP;MF;MF;MF;BP;CC;CC;BP;BP;CC;BP;BP;BP;MF;MF;BP;MF;BP;CC;CC;BP;BP;CC;CC;BP;BP;CC;CC;CC;CC;CC;CC;MF;MF;BP;BP;BP;BP;BP;BP;CC;BP;CC;BP;MF;	cell wall modification;fruit development;polysaccharide catabolic process;cellular response to auxin stimulus;cell division;cell wall assembly;photoperiodism, flowering;response to mechanical stimulus;yeast-form cell wall;xylan catabolic process;obsolete cell wall chitin metabolic process;apoplast;plant-type cell wall organization;cellular response to gibberellin stimulus;mitochondrion;response t…	K08235	-	-	probable xyloglucan endotransglucosylase/hydrolase protein 18 [Brassica napus]	PF00722.25	Glycosyl hydrolases family 16	Probable xyloglucan endotransglucosylase/hydrolase protein 18 OS=Arabidopsis thaliana OX=3702 GN=XTH18 PE=2 SV=1	3HWGR	G	Catalyzes xyloglucan endohydrolysis (XEH) and or endotransglycosylation (XET). Cleaves and religates xyloglucan polymers, an essential constituent of the primary cell wall, and thereby participates in cell wall construction of growing tissues	COG2273	Beta-glucanase, GH16 family	G	Carbohydrate transport and metabolism	-	-	-	-	-
BnaA01G0416200ZS	BnaA01G0416200ZS	3.05755	-1.49946	6.66831e-11	7.76395e-08	down	4.02316	4.7844	4.60461	13.7512	12.4371	9.31737	333	348	295	891	1058	696	GO:0070062;GO:0008114;GO:0016054;GO:0050661;GO:0019521;GO:0009536;GO:0009507;GO:0080173;GO:0005634;GO:0031406;GO:0006739;GO:0005739;GO:0097014;GO:0009409;GO:0099503;GO:0016491;GO:0009749;GO:0009651;GO:0020015;GO:0051287;GO:0030246;GO:0010629;GO:0042803;GO:0005886;GO:0009570;GO:0005737;GO:0009051;GO:0042802;GO:0009750;GO:0046177;GO:0050829;GO:0005829;GO:0004616;GO:0009737;GO:0005777;GO:0061688;GO:…	CC;MF;BP;MF;BP;CC;CC;BP;CC;MF;BP;CC;CC;BP;CC;MF;BP;BP;CC;MF;MF;BP;MF;CC;CC;CC;BP;MF;BP;BP;BP;CC;MF;BP;CC;BP;BP;BP;MF;BP;MF;BP;BP;CC;BP;	extracellular exosome;phosphogluconate 2-dehydrogenase activity;organic acid catabolic process;NADP binding;D-gluconate metabolic process;plastid;chloroplast;male-female gamete recognition during double fertilization forming a zygote and endosperm;nucleus;carboxylic acid binding;NADP metabolic process;mitochondrion;ciliary plasm;response to cold;secretory vesicle;oxidoreductase activity;response …	K00033	ko01110;ko00030;ko00480;ko01100;ko01200	Biosynthesis of secondary metabolites;Pentose phosphate pathway;Glutathione metabolism;Metabolic pathways;Carbon metabolism	PREDICTED: 6-phosphogluconate dehydrogenase, decarboxylating 3 [Brassica oleracea var. oleracea]	PF00393.23	6-phosphogluconate dehydrogenase, C-terminal domain	6-phosphogluconate dehydrogenase, decarboxylating 2 OS=Arabidopsis thaliana OX=3702 GN=PGD2 PE=1 SV=1	3HT3Y	G	Catalyzes the oxidative decarboxylation of 6- phosphogluconate to ribulose 5-phosphate and CO(2), with concomitant reduction of NADP to NADPH	COG0362	6-phosphogluconate dehydrogenase	G	Carbohydrate transport and metabolism	KOG2653	[G]	Carbohydrate transport and metabolism;	6-phosphogluconate dehydrogenase	-
BnaC06G0356600ZS	BnaC06G0356600ZS	2.81856	-1.83426	2.84114e-10	3.21855e-07	down	2.70383	3.16973	4.02198	11.3305	8.70187	12.285	97	100	112	318	321	398	GO:0060918;GO:0010929;GO:0005886;GO:0009734;	BP;BP;CC;BP;	auxin transport;positive regulation of auxin mediated signaling pathway;plasma membrane;auxin-activated signaling pathway;	-	-	-	PREDICTED: uncharacterized protein LOC106298478 [Brassica oleracea var. oleracea]	-	-	Protein BIG GRAIN 1-like E OS=Arabidopsis thaliana OX=3702 GN=At1g69160 PE=2 SV=1	3HU0A	-	-	-	-	-	-	-	-	-	-	-
BnaC06G0054300ZS	BnaC06G0054300ZS	1.60695	4.21658	5.49352e-10	6.05949e-07	up	4.58502	4.56238	11.2779	0.124758	0.330564	0.399393	51	45	97	2	4	4	-	-	-	-	-	-	-	PF14585.10	CagY type 1 repeat	-	-	-	-	-	-	-	-	-	-	-	-	-
BnaA01G0419200ZS	BnaA01G0419200ZS	0.616495	-5.16817	7.34051e-10	7.88917e-07	down	0	0.101012	0	1.3818	1.12614	1.32923	0	6	0	66	70	73	GO:0009536;GO:0009507;GO:0043066;GO:0000325;GO:0006952;GO:0005739;GO:0006811;GO:0009409;GO:0030382;GO:0005730;GO:0016006;GO:0046930;GO:0006820;GO:0005886;GO:0015288;GO:0009626;GO:0007602;GO:0009060;GO:0007005;GO:0005829;GO:0010029;GO:0110099;GO:0008308;GO:0009941;GO:0009505;GO:0005773;GO:0005741;GO:0031966;GO:0009617;GO:0007291;GO:0009527;	CC;CC;BP;CC;BP;CC;BP;BP;BP;CC;CC;CC;BP;CC;MF;BP;BP;BP;BP;CC;BP;BP;MF;CC;CC;CC;CC;CC;BP;BP;CC;	plastid;chloroplast;negative regulation of apoptotic process;plant-type vacuole;defense response;mitochondrion;monoatomic ion transport;response to cold;sperm mitochondrion organization;nucleolus;Nebenkern;pore complex;monoatomic anion transport;plasma membrane;porin activity;plant-type hypersensitive response;phototransduction;aerobic respiration;mitochondrion organization;cytosol;regulation of …	K15040	-	-	PREDICTED: mitochondrial outer membrane protein porin 1-like [Brassica oleracea var. oleracea]	PF01459.26	Eukaryotic porin	Mitochondrial outer membrane protein porin 1 OS=Arabidopsis thaliana OX=3702 GN=VDAC1 PE=1 SV=3	3HRX8	P	Mitochondrial outer membrane protein porin	-	-	-	-	KOG3126	[P]	Inorganic ion transport and metabolism;	Porin/voltage-dependent anion-selective channel protein	-
BnaC07G0239100ZS	BnaC07G0239100ZS	3.70835	-1.29055	9.42302e-10	9.586e-07	down	7.27239	7.87475	8.87935	22.0165	17.6849	14.992	618	588	584	1464	1545	1150	GO:0010193;GO:0016887;GO:0005634;GO:0000139;GO:0006952;GO:0000325;GO:0005739;GO:0009409;GO:0007165;GO:0046713;GO:0050135;GO:0030275;GO:0034644;GO:0140376;GO:0071456;GO:0034052;GO:0042803;GO:0005886;GO:0005789;GO:0009626;GO:0005737;GO:0050832;GO:0019677;GO:0046872;GO:0042802;GO:0002229;GO:0003700;GO:0043565;GO:0002239;GO:0016310;GO:0002758;GO:0009941;GO:0004674;GO:0043531;GO:0061809;GO:0042742;GO:…	BP;MF;CC;CC;BP;CC;CC;BP;BP;BP;MF;MF;BP;MF;BP;BP;MF;CC;CC;BP;CC;BP;BP;MF;MF;BP;MF;MF;BP;BP;BP;CC;MF;MF;MF;BP;BP;MF;MF;	response to ozone;ATP hydrolysis activity;nucleus;Golgi membrane;defense response;plant-type vacuole;mitochondrion;response to cold;signal transduction;borate transport;NADP+ nucleosidase activity;LRR domain binding;cellular response to UV;innate immune receptor activity;cellular response to hypoxia;positive regulation of plant-type hypersensitive response;protein homodimerization activity;plasma…	-	-	-	probable disease resistance protein At4g19520 [Brassica napus]	PF00931.26	NB-ARC domain	Probable disease resistance protein At4g19520 OS=Arabidopsis thaliana OX=3702 GN=At4g19520 PE=3 SV=1	-	-	-	-	-	-	-	-	-	-	-	-
MSTRG.21600.1	MSTRG.21600.1	0.828499	-2.05654	9.42571e-10	9.586e-07	down	0.270087	0.416545	0.348099	1.2342	1.45614	1.35644	29	40	29	103	160	131	GO:0009506;GO:1901684;GO:0006817;GO:0009873;GO:0005773;GO:0005794;GO:1901683;GO:0009723;GO:0005315;GO:0016036;GO:0015114;GO:0005886;GO:0016020;GO:0015293;GO:0009610;GO:0080187;	CC;BP;BP;BP;CC;CC;MF;BP;MF;BP;MF;CC;CC;MF;BP;BP;	plasmodesma;arsenate ion transmembrane transport;phosphate ion transport;ethylene-activated signaling pathway;vacuole;Golgi apparatus;arsenate ion transmembrane transporter activity;response to ethylene;phosphate transmembrane transporter activity;cellular response to phosphate starvation;obsolete phosphate ion transmembrane transporter activity;plasma membrane;membrane;symporter activity;respons…	-	-	-	inorganic phosphate transporter 1-4 [Brassica napus]	PF00083.28	Sugar (and other) transporter	Inorganic phosphate transporter 1-4 OS=Arabidopsis thaliana OX=3702 GN=PHT1-4 PE=1 SV=1	3HXCA	P	carbohydrate transmembrane transporter inorganic phosphate transmembrane transporter phosphate transmembrane transporter sugar hydrogen symporter	COG0477	MFS family permease, includes anhydromuropeptide permease AmpG	GEPR	-	KOG0252	[P]	Inorganic ion transport and metabolism;	Inorganic phosphate transporter	-
BnaC03G0314000ZS	BnaC03G0314000ZS	1.62459	-2.74294	9.7574e-10	9.586e-07	down	0.523286	0.953555	0.790713	3.05214	7.88753	3.47918	52	83	61	236	798	309	GO:0010193;GO:0031625;GO:0050826;GO:0005634;GO:0009738;GO:0004713;GO:0031663;GO:0006468;GO:0071215;GO:0006952;GO:0016301;GO:0005739;GO:0009409;GO:0045087;GO:0004712;GO:0033612;GO:0004675;GO:0004672;GO:0009787;GO:0030246;GO:0006979;GO:0009751;GO:0052545;GO:0071456;GO:1900459;GO:0009620;GO:0005886;GO:0009625;GO:0046777;GO:0060320;GO:0009626;GO:0012501;GO:0006955;GO:0000302;GO:0009506;GO:0106310;GO:…	BP;MF;BP;CC;BP;MF;BP;BP;BP;BP;MF;CC;BP;BP;MF;MF;MF;MF;BP;MF;BP;BP;BP;BP;BP;BP;CC;BP;BP;BP;BP;BP;BP;BP;CC;MF;MF;MF;BP;MF;BP;BP;BP;CC;BP;BP;CC;CC;BP;BP;BP;BP;MF;BP;BP;BP;CC;BP;BP;MF;BP;MF;	response to ozone;ubiquitin protein ligase binding;response to freezing;nucleus;abscisic acid-activated signaling pathway;protein tyrosine kinase activity;lipopolysaccharide-mediated signaling pathway;protein phosphorylation;cellular response to abscisic acid stimulus;defense response;kinase activity;mitochondrion;response to cold;innate immune response;protein serine/threonine/tyrosine kinase ac…	-	-	-	cysteine-rich receptor-like protein kinase 38 [Brassica napus]	PF00069.29	Protein kinase domain	Cysteine-rich receptor-like protein kinase 38 OS=Arabidopsis thaliana OX=3702 GN=CRK38 PE=3 SV=1	3HZAJ	T	Cysteine-rich receptor-like protein kinase	COG0515	Serine/threonine protein kinase	T	Signal transduction mechanisms	-	-	-	-	-
BnaC04G0616100ZS	BnaC04G0616100ZS	3.65177	-2.4823	9.83414e-10	9.586e-07	down	4.05311	7.26417	3.87514	27.5808	18.8662	33.1054	320	505	237	1705	1533	2360	GO:0080147;GO:0042545;GO:0030599;GO:0051722;GO:0005634;GO:0010119;GO:0000139;GO:0000325;GO:0048046;GO:0009409;GO:0030598;GO:0004857;GO:0005802;GO:0009624;GO:0071456;GO:0009846;GO:0009860;GO:0010043;GO:0090406;GO:0048364;GO:0009620;GO:1902066;GO:0005886;GO:0052542;GO:0090729;GO:0050832;GO:0017148;GO:0046910;GO:0005737;GO:0045330;GO:0003729;GO:0009835;GO:0048358;GO:0050829;GO:0005829;GO:0005576;GO:…	BP;BP;MF;MF;CC;BP;CC;CC;CC;BP;MF;MF;CC;BP;BP;BP;BP;BP;CC;BP;BP;BP;CC;BP;MF;BP;BP;MF;CC;MF;MF;BP;BP;BP;CC;CC;BP;CC;BP;CC;CC;CC;BP;CC;BP;MF;BP;BP;BP;BP;BP;BP;CC;BP;CC;	root hair cell development;cell wall modification;pectinesterase activity;protein C-terminal methylesterase activity;nucleus;regulation of stomatal movement;Golgi membrane;plant-type vacuole;apoplast;response to cold;rRNA N-glycosylase activity;enzyme inhibitor activity;trans-Golgi network;response to nematode;cellular response to hypoxia;pollen germination;pollen tube growth;response to zinc ion…	-	ko01100;ko00040	Metabolic pathways;Pentose and glucuronate interconversions	probable pectinesterase/pectinesterase inhibitor 20 [Brassica napus]	PF01095.23	Pectinesterase	Probable pectinesterase/pectinesterase inhibitor 20 OS=Arabidopsis thaliana OX=3702 GN=PME20 PE=2 SV=2	3HX8Y	G	Pectinesterase	COG4677	Pectin methylesterase and related acyl-CoA thioesterases	GI	-	-	-	-	-	-
BnaA06G0014300ZS	BnaA06G0014300ZS	1.61535	3.47463	1.12343e-09	1.0702e-06	up	5.93708	8.29755	3.08321	0.327063	0.857908	0.273917	235	288	95	11	35	10	GO:1900425;GO:0043621;GO:0071318;GO:0071323;GO:1901001;GO:0005634;GO:0009738;GO:0006468;GO:0006952;GO:0000325;GO:0048046;GO:0016301;GO:0071369;GO:0071395;GO:0005739;GO:0140426;GO:0004675;GO:2000022;GO:0045735;GO:0004672;GO:0005537;GO:0030246;GO:0106167;GO:0009751;GO:0005509;GO:0005886;GO:0046777;GO:0062074;GO:0090729;GO:0050832;GO:0009626;GO:0030145;GO:0071472;GO:0062075;GO:0009506;GO:0106310;GO:…	BP;MF;BP;BP;BP;CC;BP;BP;BP;CC;CC;MF;BP;BP;CC;BP;MF;BP;MF;MF;MF;MF;BP;BP;MF;CC;BP;CC;MF;BP;BP;MF;BP;BP;CC;MF;BP;MF;CC;BP;MF;BP;CC;BP;BP;BP;BP;BP;CC;BP;MF;BP;BP;MF;CC;BP;BP;BP;BP;CC;BP;BP;BP;MF;BP;MF;BP;BP;	negative regulation of defense response to bacterium;obsolete protein self-association;cellular response to ATP;cellular response to chitin;negative regulation of response to salt stress;nucleus;abscisic acid-activated signaling pathway;protein phosphorylation;defense response;plant-type vacuole;apoplast;kinase activity;cellular response to ethylene stimulus;cellular response to jasmonic acid sti…	-	-	-	lectin-like protein At1g53080 [Brassica napus]	PF00139.23	Legume lectin domain	Lectin-like protein At1g53080 OS=Arabidopsis thaliana OX=3702 GN=At1g53080 PE=2 SV=1	3HY55	T	Belongs to the leguminous lectin family	-	-	-	-	-	-	-	-	-
MSTRG.100155.9	MSTRG.100155.9	0.628781	8.18656	1.94075e-09	1.8077e-06	up	0.509342	1.162	3.15503	0	0.008029	0	42	83	197	0	1	0	GO:0005737;GO:0003924;GO:0003743;GO:0004222;GO:0008237;GO:0006508;GO:0009897;GO:0005525;GO:1990913;GO:0007283;GO:0005886;GO:0008584;	CC;MF;MF;MF;MF;BP;CC;MF;CC;BP;CC;BP;	cytoplasm;GTPase activity;translation initiation factor activity;metalloendopeptidase activity;metallopeptidase activity;proteolysis;external side of plasma membrane;GTP binding;sperm head plasma membrane;spermatogenesis;plasma membrane;male gonad development;	-	-	-	formin-like protein 4 [Brassica napus]	PF03929.20	PepSY-associated TM region	Translation initiation factor IF-2 OS=Rhodococcus opacus (strain B4) OX=632772 GN=infB PE=3 SV=1	-	-	-	COG0532	Translation initiation factor IF-2, a GTPase	J	Translation, ribosomal structure and biogenesis	KOG3607	[O]	Posttranslational modification, protein turnover, chaperones;	Meltrins, fertilins and related Zn-dependent metalloproteinases of the ADAMs family	-
BnaC03G0042200ZS	BnaC03G0042200ZS	6.42186	-1.10273	2.07344e-09	1.88931e-06	down	67.724	51.8852	61.1095	117.143	128.913	113.65	5554	3741	3878	7523	10877	8415	GO:0015802;GO:0015810;GO:0070778;GO:0015185;GO:0009536;GO:0015399;GO:0006952;GO:0000325;GO:0015183;GO:0009624;GO:0015194;GO:0015293;GO:0015172;GO:0015186;GO:0015827;GO:0015808;GO:0006865;GO:0110126;GO:0015193;GO:0015804;GO:0005886;GO:0015174;GO:0015800;GO:0005313;GO:0016020;GO:0015180;GO:0098712;GO:0031965;GO:0015175;GO:0043090;GO:0015812;GO:0015171;	BP;BP;BP;MF;CC;MF;BP;CC;MF;BP;MF;MF;MF;MF;BP;BP;BP;BP;MF;BP;CC;MF;BP;MF;CC;MF;BP;CC;MF;BP;BP;MF;	basic amino acid transport;aspartate transmembrane transport;L-aspartate transmembrane transport;gamma-aminobutyric acid transmembrane transporter activity;plastid;primary active transmembrane transporter activity;defense response;plant-type vacuole;L-aspartate transmembrane transporter activity;response to nematode;L-serine transmembrane transporter activity;symporter activity;acidic amino acid …	K24917	-	-	amino acid permease 2 [Brassica napus]	PF01490.22	Transmembrane amino acid transporter protein	Amino acid permease 2 OS=Arabidopsis thaliana OX=3702 GN=AAP2 PE=1 SV=1	3HRD6	E	Amino acid permease	-	-	-	-	KOG1303	[E]	Amino acid transport and metabolism;	Amino acid transporters	-
BnaC08G0410100ZS	BnaC08G0410100ZS	0.867518	-6.65226	2.33363e-09	2.08115e-06	down	0.032562	0.033802	0	3.07962	2.07363	1.75593	1	1	0	74	66	49	GO:0005634;GO:0009536;GO:0000325;GO:0048046;GO:0005739;GO:0050830;GO:0099503;GO:0004784;GO:0005886;GO:0019430;GO:0009734;GO:0005737;GO:1902693;GO:0050832;GO:0030145;GO:0010497;GO:0042802;GO:2000280;GO:0050829;GO:0071555;GO:0005576;GO:0009505;GO:0050162;GO:0031012;GO:0009506;GO:0031640;	CC;CC;CC;CC;CC;BP;CC;MF;CC;BP;BP;CC;CC;BP;MF;BP;MF;BP;BP;BP;CC;CC;MF;CC;CC;BP;	nucleus;plastid;plant-type vacuole;apoplast;mitochondrion;defense response to Gram-positive bacterium;secretory vesicle;superoxide dismutase activity;plasma membrane;removal of superoxide radicals;auxin-activated signaling pathway;cytoplasm;superoxide dismutase complex;defense response to fungus;manganese ion binding;plasmodesmata-mediated intercellular transport;identical protein binding;regulat…	-	-	-	germin-like protein subfamily 2 member 4 [Brassica napus]	PF00190.26	Cupin	Germin-like protein subfamily 2 member 4 OS=Arabidopsis thaliana OX=3702 GN=GLP10 PE=2 SV=1	3HRMY	S	Cupin domain	COG2140	Oxalate decarboxylase/archaeal phosphoglucose isomerase, cupin superfamily	G	Carbohydrate transport and metabolism	-	-	-	-	-
BnaC02G0505800ZS	BnaC02G0505800ZS	3.77197	-1.84823	2.62149e-09	2.28916e-06	down	4.72023	6.34526	10.0841	26.9625	21.187	21.494	93	110	153	414	428	381	GO:0046872;	MF;	metal ion binding;	-	-	-	heavy metal-associated isoprenylated plant protein 2 isoform X1 [Brassica napus]	PF00403.30	Heavy-metal-associated domain	Heavy metal-associated isoprenylated plant protein 2 OS=Arabidopsis thaliana OX=3702 GN=HIPP02 PE=3 SV=1	3GM33	P	Heavy metal-associated isoprenylated plant protein	-	-	-	-	KOG1603	[P]	Inorganic ion transport and metabolism;	Copper chaperone	-
BnaC03G0371500ZS	BnaC03G0371500ZS	2.13856	-3.12382	2.71192e-09	2.3198e-06	down	0.503637	1.54469	1.21992	8.57986	14.2154	4.88657	13	34	24	165	359	109	GO:0046872;	MF;	metal ion binding;	-	-	-	heavy metal-associated isoprenylated plant protein 16-like [Brassica napus]	-	-	Heavy metal-associated isoprenylated plant protein 16 OS=Arabidopsis thaliana OX=3702 GN=HIPP16 PE=2 SV=1	3I07K	L	transposition, RNA-mediated	-	-	-	-	-	-	-	-	-
BnaA09G0608900ZS	BnaA09G0608900ZS	1.66956	2.22149	3.16656e-09	2.65453e-06	up	5.19528	3.64572	4.59979	0.755818	1.36269	0.550081	313	193	215	36	85	30	GO:0070062;GO:0043621;GO:0009758;GO:1990539;GO:0098793;GO:0043066;GO:0055056;GO:0005536;GO:0005975;GO:0022857;GO:0012505;GO:0007611;GO:0009651;GO:0030667;GO:0030315;GO:0071456;GO:0001666;GO:0010021;GO:0070821;GO:0071548;GO:0055085;GO:0043204;GO:1904016;GO:0005737;GO:0030140;GO:0016323;GO:1990350;GO:0051119;GO:0005901;GO:0015575;GO:0015145;GO:0030496;GO:0015284;GO:0003044;GO:0005615;GO:0005794;GO:…	CC;MF;BP;BP;CC;BP;MF;MF;BP;MF;CC;BP;BP;CC;CC;BP;BP;BP;CC;BP;BP;CC;BP;CC;CC;CC;CC;MF;CC;MF;MF;CC;MF;BP;CC;CC;CC;CC;MF;CC;BP;BP;CC;BP;BP;BP;CC;BP;BP;CC;BP;CC;BP;BP;BP;BP;CC;MF;CC;CC;CC;CC;BP;CC;BP;CC;CC;CC;MF;BP;BP;MF;CC;MF;MF;BP;CC;MF;BP;CC;CC;MF;CC;BP;MF;CC;CC;BP;MF;MF;BP;MF;BP;CC;BP;CC;BP;BP;CC;CC;CC;MF;MF;BP;BP;MF;CC;MF;CC;BP;CC;MF;BP;CC;BP;CC;BP;MF;BP;MF;CC;BP;BP;BP;CC;BP;MF;BP;BP;CC;BP;BP;BP;…	extracellular exosome;obsolete protein self-association;carbohydrate utilization;fructose import across plasma membrane;presynapse;negative regulation of apoptotic process;D-glucose transmembrane transporter activity;D-glucose binding;carbohydrate metabolic process;transmembrane transporter activity;endomembrane system;learning or memory;response to salt stress;secretory granule membrane;T-tubule…	K03444	-	-	sugar transporter ERD6-like 4 [Brassica napus]	PF00083.28	Sugar (and other) transporter	Sugar transporter ERD6-like 4 OS=Arabidopsis thaliana OX=3702 GN=At1g19450 PE=2 SV=1	3HW9D	U	Belongs to the major facilitator superfamily. Sugar transporter (TC 2.A.1.1) family	COG0477	MFS family permease, includes anhydromuropeptide permease AmpG	GEPR	-	KOG0254	[R]	General function prediction only;	Predicted transporter (major facilitator superfamily)	-
BnaC04G0512600ZS	BnaC04G0512600ZS	1.35712	-2.02541	3.51389e-09	2.88794e-06	down	0.514619	0.790233	0.923053	2.62022	3.21864	2.54888	23	30	31	89	143	100	GO:0102843;GO:0005506;GO:0031670;GO:0009055;GO:0032896;GO:0004768;GO:0017105;GO:0042632;GO:0006631;GO:0045087;GO:0050830;GO:0016491;GO:0005730;GO:0008610;GO:0016717;GO:0001666;GO:0020037;GO:0009791;GO:0031969;GO:0042811;GO:0102985;GO:0005789;GO:0032541;GO:0006633;GO:0006641;GO:1903966;GO:0016215;GO:0042552;GO:0010025;GO:0046872;GO:0070542;GO:0042759;GO:0007584;GO:0048733;GO:0042761;GO:0102657;GO:…	MF;MF;BP;MF;MF;MF;MF;BP;BP;BP;BP;MF;CC;BP;MF;BP;MF;BP;CC;BP;MF;CC;CC;BP;BP;BP;MF;BP;BP;MF;BP;BP;BP;BP;BP;MF;BP;BP;CC;CC;BP;BP;BP;BP;CC;CC;BP;BP;BP;BP;BP;BP;BP;BP;	palmitoyl-[glycerolipid] 7-desaturase activity;iron ion binding;cellular response to nutrient;electron transfer activity;palmitoyl-CoA 9-desaturase activity;stearoyl-CoA 9-desaturase activity;acyl-CoA delta11-(Z)-desaturase activity;cholesterol homeostasis;fatty acid metabolic process;innate immune response;defense response to Gram-positive bacterium;oxidoreductase activity;nucleolus;lipid biosyn…	K23119	-	-	delta-9 acyl-lipid desaturase 2 [Brassica napus]	PF00487.28	Fatty acid desaturase	Delta-9 acyl-lipid desaturase 2 OS=Arabidopsis thaliana OX=3702 GN=ADS2 PE=1 SV=2	3GDZY	I	Belongs to the fatty acid desaturase type 1 family	COG1398	Fatty-acid desaturase	I	Lipid transport and metabolism	KOG1600	[I]	Lipid transport and metabolism;	Fatty acid desaturase	-
BnaC08G0200000ZS	BnaC08G0200000ZS	2.34901	1.20263	3.87085e-09	3.10152e-06	up	6.08293	5.6129	7.39507	2.87128	2.37507	2.40388	525	426	494	194	211	188	GO:0010286;GO:0005634;GO:0009408;GO:0005737;	BP;CC;BP;CC;	heat acclimation;nucleus;response to heat;cytoplasm;	-	-	-	uncharacterized protein LOC106453111 isoform X1 [Brassica napus]	PF00112.27	Papain family cysteine protease	Protein HEAT-INDUCED TAS1 TARGET 1 OS=Arabidopsis thaliana OX=3702 GN=HTT1 PE=1 SV=1	-	-	-	-	-	-	-	-	-	-	-	C3H
BnaA02G0057300ZS	BnaA02G0057300ZS	4.57155	-1.58225	3.92176e-09	3.10152e-06	down	14.0037	14.6948	12.2139	46.3057	31.5923	36.6733	345	319	233	894	801	816	GO:0009536;GO:0009507;GO:0000325;GO:0006952;GO:0005739;GO:0009409;GO:0005730;GO:0046930;GO:0006820;GO:0005886;GO:0015288;GO:0009626;GO:0009060;GO:0005829;GO:0010029;GO:0008308;GO:0009941;GO:0009505;GO:0005773;GO:0005741;GO:0031966;GO:0009617;GO:0009527;	CC;CC;CC;BP;CC;BP;CC;CC;BP;CC;MF;BP;BP;CC;BP;MF;CC;CC;CC;CC;CC;BP;CC;	plastid;chloroplast;plant-type vacuole;defense response;mitochondrion;response to cold;nucleolus;pore complex;monoatomic anion transport;plasma membrane;porin activity;plant-type hypersensitive response;aerobic respiration;cytosol;regulation of seed germination;voltage-gated monoatomic anion channel activity;chloroplast envelope;plant-type cell wall;vacuole;mitochondrial outer membrane;mitochondr…	K15040	-	-	mitochondrial outer membrane protein porin 3 [Brassica napus]	PF01459.26	Eukaryotic porin	Mitochondrial outer membrane protein porin 3 OS=Arabidopsis thaliana OX=3702 GN=VDAC3 PE=1 SV=3	3HRX8	P	Mitochondrial outer membrane protein porin	-	-	-	-	KOG3126	[P]	Inorganic ion transport and metabolism;	Porin/voltage-dependent anion-selective channel protein	-
BnaC04G0603100ZS	BnaC04G0603100ZS	2.98273	-3.21879	4.10153e-09	3.18362e-06	down	0.730756	3.69037	2.47375	14.2444	21.2059	24.5585	26	113	67	388	758	770	GO:0005938;GO:0055062;GO:0015562;GO:0030643;GO:0005634;GO:0000329;GO:0035435;GO:0015114;GO:0009615;GO:0071944;GO:0051511;GO:0006799;GO:0042144;GO:0001501;GO:0061736;GO:0016036;GO:0030225;GO:2000024;GO:0005774;GO:0070417;GO:0071456;GO:0006112;GO:0014004;GO:0031090;GO:0005886;GO:0005789;GO:0006797;GO:0140255;GO:0033254;GO:0005737;GO:0008976;GO:0000822;GO:0046872;GO:0005516;GO:0080040;GO:0007034;GO:…	CC;BP;MF;BP;CC;CC;BP;MF;BP;CC;BP;BP;BP;BP;BP;BP;BP;BP;CC;BP;BP;BP;BP;CC;CC;CC;BP;BP;CC;CC;MF;MF;MF;MF;BP;BP;CC;BP;BP;CC;CC;CC;CC;BP;CC;MF;MF;BP;MF;	cell cortex;phosphate ion homeostasis;efflux transmembrane transporter activity;intracellular phosphate ion homeostasis;nucleus;fungal-type vacuole membrane;phosphate ion transmembrane transport;obsolete phosphate ion transmembrane transporter activity;response to virus;cell periphery;negative regulation of unidimensional cell growth;polyphosphate biosynthetic process;vacuole fusion, non-autophag…	-	-	-	SPX domain-containing protein 3 [Brassica napus]	PF03105.23	SPX domain	SPX domain-containing protein 3 OS=Arabidopsis thaliana OX=3702 GN=SPX3 PE=2 SV=1	3HT0E	P	SPX domain-containing protein	-	-	-	-	KOG1161	[P]	Inorganic ion transport and metabolism;	Protein involved in vacuolar polyphosphate accumulation, contains SPX domain	-
BnaA07G0288800ZS	BnaA07G0288800ZS	0.356651	-3.3637	1.03346e-08	7.87593e-06	down	0.021014	0.031033	0.126235	0.708522	0.573446	0.382833	5	6	21	118	126	74	GO:0006260;GO:0031848;GO:0005524;GO:0000723;GO:0003684;GO:0051301;GO:0008409;GO:0005634;GO:0032042;GO:0030430;GO:0006281;GO:0010225;GO:0005739;GO:0009409;GO:0005654;GO:0080111;GO:0001650;GO:0005730;GO:2000685;GO:0000012;GO:1901255;GO:0006979;GO:0003910;GO:0071897;GO:0043596;GO:0005525;GO:0006266;GO:0003677;GO:0042803;GO:0008800;GO:1904975;GO:1903461;GO:0006284;GO:0042542;GO:0016233;GO:0005737;GO:…	BP;BP;MF;BP;MF;BP;MF;CC;BP;CC;BP;BP;CC;BP;CC;BP;CC;CC;BP;BP;BP;BP;MF;BP;CC;MF;BP;MF;MF;MF;BP;BP;BP;BP;BP;CC;BP;CC;CC;MF;BP;BP;MF;BP;MF;MF;BP;BP;BP;BP;BP;BP;BP;BP;BP;CC;BP;BP;BP;BP;CC;BP;BP;	DNA replication;protection from non-homologous end joining at telomere;ATP binding;telomere maintenance;damaged DNA binding;cell division;5'-3' exonuclease activity;nucleus;mitochondrial DNA metabolic process;host cell cytoplasm;DNA repair;response to UV-C;mitochondrion;response to cold;nucleoplasm;obsolete DNA demethylation;fibrillar center;nucleolus;positive regulation of cellular response to X…	-	ko03030;ko03410;ko03420;ko03430	DNA replication;Base excision repair;Nucleotide excision repair;Mismatch repair	DNA ligase 6 [Brassica rapa]	PF01068.25	ATP dependent DNA ligase domain	DNA ligase 6 OS=Arabidopsis thaliana OX=3702 GN=LIG6 PE=2 SV=1	3HQMB	L	DNA ligase	COG1793	ATP-dependent DNA ligase	L	Replication, recombination and repair	KOG0967	[L]	Replication, recombination and repair;	ATP-dependent DNA ligase I	-
BnaC08G0252100ZS	BnaC08G0252100ZS	1.14374	-2.66867	1.1201e-08	8.34654e-06	down	0.531949	0.268543	0.48112	4.18305	1.79561	1.78991	40	18	28	241	136	119	GO:0080103;GO:0046322;GO:0016597;GO:0019825;GO:0050661;GO:0004497;GO:0009723;GO:0006805;GO:0000139;GO:0042412;GO:0000325;GO:0006739;GO:0004499;GO:0051707;GO:0009735;GO:0005654;GO:0047822;GO:0097009;GO:0010600;GO:0042178;GO:2000024;GO:0048444;GO:0090332;GO:0071456;GO:0009751;GO:0047638;GO:0046885;GO:0046620;GO:0000098;GO:0009684;GO:0106294;GO:0032496;GO:0005789;GO:0080106;GO:0070995;GO:0009851;GO:…	MF;BP;MF;MF;MF;MF;BP;BP;CC;BP;CC;BP;MF;BP;BP;CC;MF;BP;BP;BP;BP;BP;BP;BP;BP;MF;BP;BP;BP;BP;MF;BP;CC;MF;BP;BP;BP;BP;BP;BP;CC;BP;MF;BP;MF;MF;MF;BP;BP;MF;MF;BP;MF;CC;MF;CC;BP;BP;MF;CC;MF;BP;CC;CC;CC;MF;BP;BP;BP;MF;BP;BP;MF;BP;MF;	4-methylthiopropyl glucosinolate S-oxygenase activity;negative regulation of fatty acid oxidation;amino acid binding;oxygen binding;NADP binding;monooxygenase activity;response to ethylene;xenobiotic metabolic process;Golgi membrane;taurine biosynthetic process;plant-type vacuole;NADP metabolic process;N,N-dimethylaniline monooxygenase activity;response to other organism;response to cytokinin;nuc…	K00485	-	-	probable flavin-containing monooxygenase 1 [Brassica napus]	PF00743.23	Flavin-binding monooxygenase-like	Probable flavin-containing monooxygenase 1 OS=Arabidopsis thaliana OX=3702 GN=FMO1 PE=2 SV=1	3HSTP	Q	FAD binding NADP or NADPH binding electron carrier flavin-containing monooxygenase monooxygenase oxidoreductase	COG2072	Predicted flavoprotein CzcO associated with the cation diffusion facilitator CzcD	P	Inorganic ion transport and metabolism	KOG1399	[Q]	Secondary metabolites biosynthesis, transport and catabolism;	Flavin-containing monooxygenase	-
BnaA09G0165600ZS	BnaA09G0165600ZS	4.34353	2.15521	1.13504e-08	8.34654e-06	up	30.1265	62.5108	34.9603	7.89965	9.30957	9.73462	1472	2685	1321	303	468	430	GO:0004032;GO:0070062;GO:0006813;GO:0006772;GO:0009055;GO:0005795;GO:0034220;GO:0005634;GO:0009507;GO:0009536;GO:0045122;GO:0005975;GO:0005739;GO:0016491;GO:0009443;GO:0016614;GO:0016616;GO:0006974;GO:0019853;GO:0004033;GO:0102976;GO:0005886;GO:0005635;GO:0042821;GO:0009734;GO:0005737;GO:0051596;GO:0044597;GO:0044598;GO:0006012;GO:0019439;GO:0019170;GO:0042802;GO:0042820;GO:0070402;GO:0009820;GO:…	MF;CC;BP;BP;MF;CC;BP;CC;CC;CC;BP;BP;CC;MF;BP;MF;MF;BP;BP;MF;MF;CC;CC;BP;BP;CC;BP;BP;BP;BP;BP;MF;MF;BP;MF;BP;MF;CC;MF;BP;BP;MF;MF;BP;CC;CC;MF;CC;BP;BP;MF;BP;MF;	aldose reductase (NADPH) activity;extracellular exosome;potassium ion transport;thiamine metabolic process;electron transfer activity;Golgi stack;monoatomic ion transmembrane transport;nucleus;chloroplast;plastid;aflatoxin biosynthetic process;carbohydrate metabolic process;mitochondrion;oxidoreductase activity;pyridoxal 5'-phosphate salvage;oxidoreductase activity, acting on CH-OH group of donor…	-	-	-	probable aldo-keto reductase 6 [Brassica napus]	PF00248.25	Aldo/keto reductase family	Probable aldo-keto reductase 6 OS=Arabidopsis thaliana OX=3702 GN=At1g60750 PE=3 SV=1	3HWNY	C	aldo-keto reductase	COG0667	Pyridoxal reductase PdxI or related oxidoreductase, aldo/keto reductase family	HR	-	KOG1575	[C]	Energy production and conversion;	Voltage-gated shaker-like K+ channel, subunit beta/KCNAB	-
BnaA02G0411500ZS	BnaA02G0411500ZS	2.27424	-1.58793	1.82841e-08	1.32134e-05	down	1.87315	2.49445	2.37071	6.43093	5.41661	6.94113	99	116	97	265	294	330	GO:0005946;GO:0005634;GO:0009507;GO:0005975;GO:0005739;GO:0009409;GO:0003825;GO:0016798;GO:0005730;GO:0046686;GO:0009651;GO:0030246;GO:0006979;GO:0004553;GO:0006970;GO:0005886;GO:0034605;GO:0070413;GO:0005992;GO:0009274;GO:0004805;GO:0046872;GO:2000032;GO:0016791;GO:0016311;GO:0010508;GO:0005829;GO:0005576;GO:0005991;GO:0000287;GO:0031505;GO:0015927;	CC;CC;CC;BP;CC;BP;MF;MF;CC;BP;BP;MF;BP;MF;BP;CC;BP;BP;BP;CC;MF;MF;BP;MF;BP;BP;CC;CC;BP;MF;BP;MF;	alpha,alpha-trehalose-phosphate synthase complex (UDP-forming);nucleus;chloroplast;carbohydrate metabolic process;mitochondrion;response to cold;alpha,alpha-trehalose-phosphate synthase (UDP-forming) activity;hydrolase activity, acting on glycosyl bonds;nucleolus;response to cadmium ion;response to salt stress;carbohydrate binding;response to oxidative stress;hydrolase activity, hydrolyzing O-gly…	K01087	ko00500;ko01100	Starch and sucrose metabolism;Metabolic pathways	probable trehalose-phosphate phosphatase J [Brassica napus]	PF02358.20	Trehalose-phosphatase	Probable trehalose-phosphate phosphatase J OS=Arabidopsis thaliana OX=3702 GN=TPPJ PE=1 SV=1	3HVHP	G	Removes the phosphate from trehalose 6-phosphate to produce free trehalose	COG1877	Trehalose-6-phosphate phosphatase	G	Carbohydrate transport and metabolism	KOG1050	[G]	Carbohydrate transport and metabolism;	Trehalose-6-phosphate synthase component TPS1 and related subunits	-
BnaC04G0574100ZS	BnaC04G0574100ZS	6.15752	-1.29798	1.97457e-08	1.40188e-05	down	40.3676	50.8099	49.1619	99.1857	103.536	116.511	1153	1276	1086	2218	3042	3004	GO:0004864;GO:0005634;GO:0009867;GO:0009738;GO:0090351;GO:0009536;GO:0006952;GO:0009409;GO:0009789;GO:0009651;GO:0010427;GO:0006970;GO:0009705;GO:0042803;GO:0005886;GO:0005737;GO:0080163;GO:1905183;GO:0042802;GO:1902584;GO:0005829;GO:0009737;GO:0009845;GO:0038023;GO:0062049;GO:0009414;GO:0044389;	MF;CC;BP;BP;BP;CC;BP;BP;BP;BP;MF;BP;CC;MF;CC;CC;BP;BP;MF;BP;CC;BP;BP;MF;CC;BP;MF;	protein phosphatase inhibitor activity;nucleus;jasmonic acid mediated signaling pathway;abscisic acid-activated signaling pathway;seedling development;plastid;defense response;response to cold;positive regulation of abscisic acid-activated signaling pathway;response to salt stress;abscisic acid binding;response to osmotic stress;plant-type vacuole membrane;protein homodimerization activity;plasma…	K14496	ko04075;ko04016	Plant hormone signal transduction;MAPK signaling pathway - plant	PREDICTED: abscisic acid receptor PYL6 [Brassica oleracea var. oleracea]	PF10604.13	Polyketide cyclase / dehydrase and lipid transport	Abscisic acid receptor PYL6 OS=Arabidopsis thaliana OX=3702 GN=PYL6 PE=1 SV=1	3HW4W	S	Abscisic acid receptor	-	-	-	-	-	-	-	-	-
BnaC09G0160400ZS	BnaC09G0160400ZS	0.69964	-2.2142	2.00675e-08	1.40188e-05	down	0.27938	0.31272	0.166422	0.920262	1.40204	1.03099	41	41	19	106	212	137	GO:0010193;GO:0005929;GO:0043621;GO:0016887;GO:0010082;GO:0009867;GO:0005634;GO:0006401;GO:0000139;GO:0006952;GO:0000325;GO:0051707;GO:0009615;GO:0005739;GO:0005654;GO:0009409;GO:0007165;GO:0012505;GO:0050135;GO:0004016;GO:0002213;GO:0030275;GO:0034644;GO:0140376;GO:0071456;GO:0030246;GO:0000166;GO:0034052;GO:0051607;GO:0007166;GO:0052542;GO:0003677;GO:0042803;GO:0005886;GO:0005789;GO:0006742;GO:…	BP;CC;MF;MF;BP;BP;CC;BP;CC;BP;CC;BP;BP;CC;CC;BP;BP;CC;MF;MF;BP;MF;BP;MF;BP;MF;MF;BP;BP;BP;BP;MF;MF;CC;CC;BP;CC;BP;BP;CC;BP;BP;CC;BP;BP;MF;BP;BP;CC;MF;MF;MF;BP;BP;BP;MF;MF;CC;BP;CC;BP;BP;BP;CC;CC;MF;MF;MF;BP;CC;BP;BP;BP;BP;MF;BP;BP;MF;	response to ozone;cilium;obsolete protein self-association;ATP hydrolysis activity;regulation of root meristem growth;jasmonic acid mediated signaling pathway;nucleus;RNA catabolic process;Golgi membrane;defense response;plant-type vacuole;response to other organism;response to virus;mitochondrion;nucleoplasm;response to cold;signal transduction;endomembrane system;NADP+ nucleosidase activity;ade…	-	-	-	PREDICTED: LOW QUALITY PROTEIN: disease resistance protein RML1B-like [Brassica oleracea var. oleracea]	PF01582.24	TIR domain	Disease resistance protein RML1B OS=Arabidopsis thaliana OX=3702 GN=RLM1B PE=2 SV=1	-	-	-	COG4886	Leucine-rich repeat (LRR) protein	K	Transcription	-	-	-	-	-
BnaC05G0012600ZS	BnaC05G0012600ZS	1.79014	1.95159	2.12402e-08	1.45948e-05	up	5.5708	3.40407	5.28813	1.19722	1.45241	0.745272	219	118	161	37	59	27	GO:0080147;GO:0009585;GO:0010154;GO:0046983;GO:0005634;GO:0009738;GO:0010017;GO:0009723;GO:0090351;GO:0009639;GO:0010100;GO:0009638;GO:0010244;GO:0009409;GO:1990785;GO:0010099;GO:0009637;GO:1905421;GO:0010600;GO:0009642;GO:0042548;GO:0010047;GO:0009693;GO:0009567;GO:0006783;GO:0000976;GO:0010218;GO:0006357;GO:0003677;GO:0015995;GO:0006355;GO:0009416;GO:0009733;GO:0045893;GO:0010928;GO:0010161;GO:…	BP;BP;BP;MF;CC;BP;BP;BP;BP;BP;BP;BP;BP;BP;BP;BP;BP;BP;BP;BP;BP;BP;BP;BP;BP;MF;BP;BP;MF;BP;BP;BP;BP;BP;BP;BP;BP;BP;BP;MF;BP;BP;MF;MF;MF;MF;CC;BP;BP;BP;BP;BP;BP;BP;BP;MF;BP;BP;BP;BP;BP;BP;BP;BP;BP;BP;BP;BP;CC;BP;BP;	root hair cell development;red, far-red light phototransduction;fruit development;protein dimerization activity;nucleus;abscisic acid-activated signaling pathway;red or far-red light signaling pathway;response to ethylene;seedling development;response to red or far red light;negative regulation of photomorphogenesis;phototropism;response to low fluence blue light stimulus by blue low-fluence syst…	-	-	-	PREDICTED: LOW QUALITY PROTEIN: transcription factor HFR1 [Brassica oleracea var. oleracea]	PF00010.30	Helix-loop-helix DNA-binding domain	Transcription factor HFR1 OS=Arabidopsis thaliana OX=3702 GN=HFR1 PE=1 SV=1	-	-	-	-	-	-	-	-	-	-	-	-
BnaC07G0238100ZS	BnaC07G0238100ZS	1.40984	-2.22397	2.17277e-08	1.4689e-05	down	0.521225	0.944568	0.692721	4.09953	2.36687	3.09327	30	47	30	179	136	156	GO:0010193;GO:0016887;GO:0005634;GO:0000139;GO:0006952;GO:0000325;GO:0005739;GO:0009409;GO:0007165;GO:0046713;GO:0050135;GO:0030275;GO:0034644;GO:0140376;GO:0071456;GO:0034052;GO:0042803;GO:0005886;GO:0005789;GO:0009626;GO:0005737;GO:0050832;GO:0019677;GO:0046872;GO:0042802;GO:0002229;GO:0003700;GO:0043565;GO:0002239;GO:0016310;GO:0002758;GO:0009941;GO:0004674;GO:0043531;GO:0061809;GO:0042742;GO:…	BP;MF;CC;CC;BP;CC;CC;BP;BP;BP;MF;MF;BP;MF;BP;BP;MF;CC;CC;BP;CC;BP;BP;MF;MF;BP;MF;MF;BP;BP;BP;CC;MF;MF;MF;BP;BP;MF;MF;	response to ozone;ATP hydrolysis activity;nucleus;Golgi membrane;defense response;plant-type vacuole;mitochondrion;response to cold;signal transduction;borate transport;NADP+ nucleosidase activity;LRR domain binding;cellular response to UV;innate immune receptor activity;cellular response to hypoxia;positive regulation of plant-type hypersensitive response;protein homodimerization activity;plasma…	-	-	-	probable disease resistance protein At4g19520 [Brassica napus]	PF00931.26	NB-ARC domain	Protein DA1-related 4 OS=Arabidopsis thaliana OX=3702 GN=DAR4 PE=1 SV=2	-	-	-	-	-	-	-	-	-	-	-	-
BnaA01G0115500ZS	BnaA01G0115500ZS	3.42329	-1.37508	2.42386e-08	1.60278e-05	down	4.77765	6.19212	7.93768	14.5781	17.3386	13.3672	223	254	287	532	832	563	GO:0000325;GO:0048046;GO:0051707;GO:0005739;GO:0099503;GO:0004672;GO:0006979;GO:0009751;GO:0005886;GO:0009626;GO:0012501;GO:0000302;GO:0009506;GO:0106310;GO:0005829;GO:0005576;GO:0009737;GO:0016020;GO:0016310;GO:0004674;GO:0005773;GO:0042742;GO:0002237;GO:0005524;GO:0009627;	CC;CC;BP;CC;CC;MF;BP;BP;CC;BP;BP;BP;CC;MF;CC;CC;BP;CC;BP;MF;CC;BP;BP;MF;BP;	plant-type vacuole;apoplast;response to other organism;mitochondrion;secretory vesicle;protein kinase activity;response to oxidative stress;response to salicylic acid;plasma membrane;plant-type hypersensitive response;programmed cell death;response to reactive oxygen species;plasmodesma;protein serine kinase activity;cytosol;extracellular region;response to abscisic acid;membrane;phosphorylation;…	-	-	-	cysteine-rich receptor-like protein kinase 29 isoform X2 [Brassica napus]	PF01657.21	Salt stress response/antifungal	Cysteine-rich receptor-like protein kinase 29 OS=Arabidopsis thaliana OX=3702 GN=CRK29 PE=2 SV=1	3G71R	T	Cysteine-rich receptor-like protein kinase	-	-	-	-	-	-	-	-	-
BnaC03G0477200ZS	BnaC03G0477200ZS	1.36495	-2.35214	2.473e-08	1.60278e-05	down	0.73236	0.542048	0.652285	3.79607	3.93373	1.79557	27	18	19	108	147	59	GO:0010192;GO:0048367;GO:0007155;GO:0009536;GO:0009738;GO:0048046;GO:0005739;GO:0099503;GO:0009897;GO:0009825;GO:0009651;GO:0048364;GO:0005886;GO:0048354;GO:0030247;GO:0005829;GO:0005576;GO:0009834;GO:0005794;GO:0009505;GO:0098552;GO:0009506;	BP;BP;BP;CC;BP;CC;CC;CC;CC;BP;BP;BP;CC;BP;MF;CC;CC;BP;CC;CC;CC;CC;	mucilage biosynthetic process;shoot system development;cell adhesion;plastid;abscisic acid-activated signaling pathway;apoplast;mitochondrion;secretory vesicle;external side of plasma membrane;multidimensional cell growth;response to salt stress;root development;plasma membrane;mucilage biosynthetic process involved in seed coat development;polysaccharide binding;cytosol;extracellular region;plan…	-	-	-	fasciclin-like arabinogalactan protein 7 [Brassica napus]	PF02469.26	Fasciclin domain	Fasciclin-like arabinogalactan protein 7 OS=Arabidopsis thaliana OX=3702 GN=FLA7 PE=2 SV=1	3HQV4	S	FASCICLIN-like	-	-	-	-	-	-	-	-	-
BnaC03G0731400ZS	BnaC03G0731400ZS	7.20289	-1.26023	2.52282e-08	1.60278e-05	down	100.285	99.0477	96.1527	192.321	275.951	193.01	8374	7272	6212	12575	23707	14552	GO:0005506;GO:0016712;GO:0016102;GO:0102311;GO:0004497;GO:0072547;GO:0102963;GO:0009536;GO:0009805;GO:0102811;GO:0080088;GO:0006952;GO:0005739;GO:0010224;GO:0016099;GO:0016829;GO:0106223;GO:0019438;GO:0016114;GO:0035834;GO:0047082;GO:0102171;GO:0016711;GO:0016717;GO:0010286;GO:0020037;GO:0072550;GO:0031969;GO:0009813;GO:0102614;GO:0005886;GO:0005789;GO:0072551;GO:0102995;GO:0009733;GO:0016705;GO:…	MF;MF;BP;MF;MF;MF;MF;CC;BP;MF;BP;BP;CC;BP;BP;MF;MF;BP;BP;BP;MF;MF;MF;MF;BP;MF;MF;CC;BP;MF;CC;CC;MF;MF;BP;MF;CC;BP;MF;BP;MF;MF;MF;BP;BP;BP;MF;MF;BP;MF;BP;MF;BP;MF;CC;MF;BP;CC;BP;CC;BP;BP;MF;MF;CC;MF;BP;BP;MF;MF;BP;MF;BP;MF;BP;CC;BP;MF;	iron ion binding;oxidoreductase activity, acting on paired donors, with incorporation or reduction of molecular oxygen, reduced flavin or flavoprotein as one donor, and incorporation of one atom of oxygen;diterpenoid biosynthetic process;8-hydroxygeraniol dehydrogenase activity;monooxygenase activity;tricoumaroylspermidine meta-hydroxylase activity;(S)-corytuberine synthase activity;plastid;couma…	-	ko01100	Metabolic pathways	flavonoid 3'-monooxygenase CYP75B137 [Brassica napus]	PF00067.26	Cytochrome P450	Flavonoid 3'-monooxygenase CYP75B137 OS=Crocosmia x crocosmiiflora OX=1053288 GN=CYP75B137 PE=1 SV=1	3GD5W	Q	Belongs to the cytochrome P450 family	COG2124	Cytochrome P450	QV	-	KOG0156	[Q]	Secondary metabolites biosynthesis, transport and catabolism;	Cytochrome P450 CYP2 subfamily	-
BnaC01G0049600ZS	BnaC01G0049600ZS	2.3788	-2.72482	2.52376e-08	1.60278e-05	down	0.902349	2.52275	1.29971	10.2217	8.28703	11.3245	11	27	12	95	101	121	-	-	-	-	-	-	uncharacterized protein BNAC01G04570D [Brassica napus]	-	-	-	-	-	-	-	-	-	-	-	-	-	-	-
BnaA03G0388100ZS	BnaA03G0388100ZS	3.26454	-1.30277	3.44305e-08	2.15396e-05	down	5.59108	5.0593	6.38163	11.1861	14.0987	13.5217	149	119	132	233	386	325	GO:0009773;GO:0009055;GO:0009534;GO:0009507;GO:0009535;GO:0009414;GO:0009644;GO:0010117;GO:0071484;	BP;MF;CC;CC;CC;BP;BP;BP;BP;	photosynthetic electron transport in photosystem I;electron transfer activity;chloroplast thylakoid;chloroplast;chloroplast thylakoid membrane;response to water deprivation;response to high light intensity;photoprotection;cellular response to light intensity;	-	-	-	protein PROTON GRADIENT REGULATION 5, chloroplastic [Brassica rapa]	-	-	Protein PROTON GRADIENT REGULATION 5, chloroplastic OS=Arabidopsis thaliana OX=3702 GN=PGR5 PE=1 SV=1	3HUKA	S	proton gradient regulation 5	-	-	-	-	-	-	-	-	-
BnaC03G0254100ZS	BnaC03G0254100ZS	5.85828	-1.15483	3.65892e-08	2.24746e-05	down	32.9771	37.0167	50.4863	81.3999	92.1139	73.6991	637	629	755	1231	1831	1286	GO:0009825;GO:0016020;GO:0046622;GO:0035265;GO:0071365;GO:0005783;GO:0005634;GO:0009741;GO:0042127;GO:0008284;GO:0071369;GO:0048638;GO:0005737;GO:0009733;	BP;CC;BP;BP;BP;CC;CC;BP;BP;BP;BP;BP;CC;BP;	multidimensional cell growth;membrane;positive regulation of organ growth;organ growth;cellular response to auxin stimulus;endoplasmic reticulum;nucleus;response to brassinosteroid;regulation of cell population proliferation;positive regulation of cell population proliferation;cellular response to ethylene stimulus;regulation of developmental growth;cytoplasm;response to auxin;	-	-	-	ARGOS-like protein [Brassica napus]	PF12932.11	Vesicle coat trafficking protein Sec16 mid-region	ARGOS-like protein OS=Arabidopsis thaliana OX=3702 GN=ARL PE=2 SV=1	3I0QR	S	Auxin-Regulated Gene Involved in Organ	-	-	-	-	-	-	-	-	-
BnaC03G0004200ZS	BnaC03G0004200ZS	5.43059	1.79693	3.69974e-08	2.24746e-05	up	60.2605	93.1205	96.4647	15.4365	25.9681	24.838	2193	2979	2716	440	973	816	GO:0070062;GO:0005506;GO:0019904;GO:0044754;GO:0007155;GO:0005634;GO:0009507;GO:0035578;GO:0008043;GO:0060088;GO:1905872;GO:0035024;GO:0005739;GO:0005759;GO:0009409;GO:0006826;GO:2001107;GO:2000114;GO:0045169;GO:0008198;GO:0045663;GO:1904234;GO:0007162;GO:0003723;GO:0006979;GO:0006935;GO:0071260;GO:0045184;GO:0008199;GO:0009535;GO:1903904;GO:1904231;GO:0090023;GO:0010043;GO:0051260;GO:0008284;GO:…	CC;MF;MF;CC;BP;CC;CC;CC;CC;BP;BP;BP;CC;CC;BP;BP;BP;BP;CC;MF;BP;BP;BP;MF;BP;BP;BP;BP;MF;CC;BP;BP;BP;BP;BP;BP;CC;MF;BP;CC;BP;BP;CC;CC;CC;BP;BP;BP;BP;BP;CC;MF;BP;BP;CC;BP;CC;BP;BP;BP;CC;CC;BP;CC;MF;CC;BP;CC;CC;CC;BP;BP;BP;BP;BP;CC;BP;BP;CC;BP;CC;BP;MF;	extracellular exosome;iron ion binding;protein domain specific binding;autolysosome;cell adhesion;nucleus;chloroplast;azurophil granule lumen;obsolete intracellular ferritin complex;auditory receptor cell stereocilium organization;negative regulation of protein localization to cell leading edge;negative regulation of Rho protein signal transduction;mitochondrion;mitochondrial matrix;response to c…	K00522	-	-	PREDICTED: ferritin-1, chloroplastic [Brassica oleracea var. oleracea]	PF00210.28	Ferritin-like domain	Ferritin-1, chloroplastic OS=Brassica napus OX=3708 GN=LSC30 PE=2 SV=1	3HSKU	P	Stores iron in a soluble, non-toxic, readily available form. Important for iron homeostasis. Iron is taken up in the ferrous form and deposited as ferric hydroxides after oxidation	COG1528	Ferritin	P	Inorganic ion transport and metabolism	KOG2332	[P]	Inorganic ion transport and metabolism;	Ferritin	-
BnaA09G0158800ZS	BnaA09G0158800ZS	1.9266	-2.03989	3.85698e-08	2.3095e-05	down	1.08893	1.54028	1.45804	6.28552	3.81937	5.59085	31	38	32	138	110	141	GO:0009751;GO:0009753;GO:0009646;GO:0009617;GO:0010150;GO:0009737;GO:0005737;	BP;BP;BP;BP;BP;BP;CC;	response to salicylic acid;response to jasmonic acid;response to absence of light;response to bacterium;leaf senescence;response to abscisic acid;cytoplasm;	-	-	-	uncharacterized protein BNAA09G13560D [Brassica napus]	PF04520.17	Senescence regulator	Protein S40-6 OS=Arabidopsis thaliana OX=3702 GN=S40-6 PE=2 SV=1	3HUFV	S	Senescence regulator	-	-	-	-	-	-	-	-	-
BnaC04G0429900ZS	BnaC04G0429900ZS	2.78789	-1.47646	4.08169e-08	2.40963e-05	down	2.78085	4.42943	3.6653	9.7403	9.72548	8.83496	265	371	270	726	952	759	GO:0070062;GO:0019842;GO:0008526;GO:0046488;GO:0045717;GO:0044297;GO:0032541;GO:0005628;GO:0005737;GO:0045893;GO:0039536;GO:0008289;GO:0015914;GO:0050896;GO:0015871;GO:0005794;GO:0007049;GO:0000139;GO:0045087;GO:0008431;GO:0005811;GO:0002020;GO:0042360;GO:1901352;GO:0043325;GO:0120010;GO:0006893;GO:0019841;GO:0006896;GO:0017157;GO:0120014;GO:0039552;GO:0009908;GO:0005543;GO:0120009;GO:1900223;GO:…	CC;MF;MF;BP;BP;CC;CC;CC;CC;BP;BP;MF;BP;BP;BP;CC;BP;CC;BP;MF;CC;MF;BP;BP;MF;BP;BP;MF;BP;BP;MF;MF;BP;MF;BP;BP;MF;BP;CC;CC;BP;MF;CC;BP;BP;CC;CC;BP;BP;MF;BP;CC;BP;BP;CC;BP;CC;BP;BP;BP;BP;MF;BP;BP;BP;MF;CC;BP;BP;BP;BP;BP;BP;CC;CC;BP;MF;BP;BP;BP;CC;MF;MF;BP;BP;CC;BP;MF;BP;MF;CC;CC;MF;CC;MF;CC;BP;CC;BP;CC;BP;	extracellular exosome;vitamin binding;phosphatidylinositol transfer activity;phosphatidylinositol metabolic process;negative regulation of fatty acid biosynthetic process;cell body;cortical endoplasmic reticulum;prospore membrane;cytoplasm;positive regulation of DNA-templated transcription;negative regulation of RIG-I signaling pathway;lipid binding;phospholipid transport;response to stimulus;cho…	K26544	-	-	phosphatidylinositol/phosphatidylcholine transfer protein SFH3 [Brassica napus]	PF00650.24	CRAL/TRIO domain	Phosphatidylinositol/phosphatidylcholine transfer protein SFH3 OS=Arabidopsis thaliana OX=3702 GN=SFH3 PE=2 SV=1	3HPCK	I	Phosphatidylinositol phosphatidylcholine transfer protein	-	-	-	-	KOG1471	[I]	Lipid transport and metabolism;	Phosphatidylinositol transfer protein SEC14 and related proteins	-
BnaA03G0489800ZS	BnaA03G0489800ZS	3.5014	-2.11586	4.4761e-08	2.60577e-05	down	3.71815	5.31724	6.79244	19.8478	13.7127	28.6103	163	205	231	681	618	1132	GO:0042752;GO:0042538;GO:0005634;GO:0000325;GO:0006952;GO:0048046;GO:0009664;GO:0005739;GO:0097167;GO:0009409;GO:0099503;GO:0009651;GO:0042744;GO:0006979;GO:0071456;GO:0020037;GO:0004601;GO:0010089;GO:0048658;GO:0009269;GO:0005509;GO:0010043;GO:0009877;GO:0140825;GO:0080001;GO:0005886;GO:0050832;GO:0005737;GO:0009044;GO:0009416;GO:0003729;GO:0009808;GO:0010228;GO:0009506;GO:0046872;GO:0045730;GO:…	BP;BP;CC;CC;BP;CC;BP;CC;BP;BP;CC;BP;BP;BP;BP;MF;MF;BP;BP;BP;MF;BP;BP;MF;BP;CC;BP;CC;MF;BP;MF;BP;BP;CC;MF;BP;BP;BP;BP;BP;CC;BP;BP;CC;BP;CC;BP;CC;CC;CC;BP;BP;BP;BP;BP;	regulation of circadian rhythm;hyperosmotic salinity response;nucleus;plant-type vacuole;defense response;apoplast;plant-type cell wall organization;mitochondrion;circadian regulation of translation;response to cold;secretory vesicle;response to salt stress;hydrogen peroxide catabolic process;response to oxidative stress;cellular response to hypoxia;heme binding;peroxidase activity;xylem developm…	K00430	ko01110;ko01100;ko00940	Biosynthesis of secondary metabolites;Metabolic pathways;Phenylpropanoid biosynthesis	peroxidase 44 [Brassica napus]	PF00141.27	Peroxidase	Peroxidase 44 OS=Arabidopsis thaliana OX=3702 GN=PER44 PE=2 SV=1	3HZ2Q	W	Belongs to the peroxidase family. Classical plant (class III) peroxidase subfamily	-	-	-	-	-	-	-	-	-
BnaA08G0252400ZS	BnaA08G0252400ZS	1.20222	-2.23502	6.68181e-08	3.83655e-05	down	0.714447	0.55329	0.392681	3.52959	2.33436	1.64931	53	36	23	204	177	110	GO:0080103;GO:0046322;GO:0016597;GO:0019825;GO:0050661;GO:0004497;GO:0009723;GO:0006805;GO:0000139;GO:0042412;GO:0000325;GO:0006739;GO:0004499;GO:0051707;GO:0009735;GO:0005654;GO:0047822;GO:0097009;GO:0010600;GO:0042178;GO:2000024;GO:0048444;GO:0090332;GO:0071456;GO:0009751;GO:0047638;GO:0046885;GO:0046620;GO:0000098;GO:0009684;GO:0106294;GO:0032496;GO:0005789;GO:0080106;GO:0070995;GO:0009851;GO:…	MF;BP;MF;MF;MF;MF;BP;BP;CC;BP;CC;BP;MF;BP;BP;CC;MF;BP;BP;BP;BP;BP;BP;BP;BP;MF;BP;BP;BP;BP;MF;BP;CC;MF;BP;BP;BP;BP;BP;BP;CC;BP;MF;BP;MF;MF;MF;BP;MF;BP;MF;BP;MF;CC;MF;CC;BP;BP;MF;CC;MF;BP;CC;CC;CC;MF;BP;BP;BP;MF;BP;BP;MF;BP;MF;	4-methylthiopropyl glucosinolate S-oxygenase activity;negative regulation of fatty acid oxidation;amino acid binding;oxygen binding;NADP binding;monooxygenase activity;response to ethylene;xenobiotic metabolic process;Golgi membrane;taurine biosynthetic process;plant-type vacuole;NADP metabolic process;N,N-dimethylaniline monooxygenase activity;response to other organism;response to cytokinin;nuc…	K00485	-	-	probable flavin-containing monooxygenase 1 [Brassica rapa]	PF00743.23	Flavin-binding monooxygenase-like	Probable flavin-containing monooxygenase 1 OS=Arabidopsis thaliana OX=3702 GN=FMO1 PE=2 SV=1	3HSTP	Q	FAD binding NADP or NADPH binding electron carrier flavin-containing monooxygenase monooxygenase oxidoreductase	COG2072	Predicted flavoprotein CzcO associated with the cation diffusion facilitator CzcD	P	Inorganic ion transport and metabolism	KOG1399	[Q]	Secondary metabolites biosynthesis, transport and catabolism;	Flavin-containing monooxygenase	-
BnaC01G0107500ZS	BnaC01G0107500ZS	1.59057	-1.9546	7.0874e-08	4.01444e-05	down	0.666844	0.943874	1.42735	2.87203	4.29303	3.62924	33	41	55	111	217	161	GO:0055062;GO:0050826;GO:0009723;GO:0010119;GO:0080091;GO:0006952;GO:0010100;GO:0009094;GO:0009637;GO:0009825;GO:0009651;GO:0003682;GO:0009787;GO:0001666;GO:0035987;GO:0009739;GO:0000976;GO:0032880;GO:0048629;GO:0043480;GO:0005737;GO:0045893;GO:0009909;GO:0009753;GO:0009785;GO:0042761;GO:0008285;GO:0045723;GO:0055046;GO:1990841;GO:0045926;GO:0048765;GO:0007623;GO:0009617;GO:0080092;GO:0002237;GO:…	BP;BP;BP;BP;BP;BP;BP;BP;BP;BP;BP;MF;BP;BP;BP;BP;MF;BP;BP;BP;CC;BP;BP;BP;BP;BP;BP;BP;BP;MF;BP;BP;BP;BP;BP;BP;BP;BP;BP;BP;BP;BP;BP;BP;BP;CC;BP;BP;BP;BP;BP;BP;BP;BP;BP;BP;BP;BP;BP;BP;BP;MF;BP;BP;BP;BP;BP;BP;BP;MF;BP;BP;BP;MF;BP;BP;BP;BP;BP;BP;BP;BP;BP;BP;BP;BP;BP;BP;CC;BP;BP;BP;BP;BP;BP;BP;BP;BP;BP;BP;BP;MF;BP;BP;CC;BP;BP;BP;BP;BP;BP;BP;BP;BP;BP;BP;BP;BP;BP;BP;BP;BP;BP;BP;MF;BP;BP;BP;BP;BP;BP;BP;BP;…	phosphate ion homeostasis;response to freezing;response to ethylene;regulation of stomatal movement;regulation of raffinose metabolic process;defense response;negative regulation of photomorphogenesis;L-phenylalanine biosynthetic process;response to blue light;multidimensional cell growth;response to salt stress;chromatin binding;regulation of abscisic acid-activated signaling pathway;response to…	K09422	-	-	PREDICTED: transcription factor MYB39-like [Brassica oleracea var. oleracea]	PF00249.35	Myb-like DNA-binding domain	Transcription factor MYB39 OS=Arabidopsis thaliana OX=3702 GN=MYB39 PE=1 SV=1	3HYJA	K	Transcription factor	-	-	-	-	KOG0048	[K]	Transcription;	Transcription factor, Myb superfamily	MYB-related
BnaC07G0102000ZS	BnaC07G0102000ZS	0.458091	-2.32711	7.98828e-08	4.46438e-05	down	0.173616	0.078496	0.167264	0.874917	0.550583	0.564605	23	10	17	90	75	67	GO:0051701;GO:0044857;GO:0034504;GO:0032368;GO:0008035;GO:0042632;GO:0090108;GO:0042157;GO:0140345;GO:0022857;GO:0015417;GO:0042599;GO:1903356;GO:0006672;GO:0030667;GO:0015594;GO:0097232;GO:0000166;GO:0005525;GO:0048545;GO:0070986;GO:0032585;GO:0055085;GO:0001750;GO:0005737;GO:0090452;GO:0033700;GO:0032367;GO:0030054;GO:0016323;GO:0097208;GO:0009410;GO:0016197;GO:0034188;GO:0120202;GO:0015914;GO:…	BP;BP;BP;BP;MF;BP;BP;BP;MF;MF;MF;CC;BP;BP;CC;MF;CC;MF;MF;BP;BP;CC;BP;CC;CC;BP;BP;BP;CC;CC;CC;BP;BP;MF;CC;BP;BP;BP;BP;BP;BP;BP;BP;MF;MF;BP;CC;BP;BP;CC;CC;BP;BP;MF;MF;MF;BP;BP;BP;BP;CC;CC;MF;BP;MF;BP;CC;BP;BP;BP;BP;CC;BP;BP;CC;CC;MF;BP;BP;BP;BP;CC;MF;BP;BP;CC;BP;BP;CC;BP;BP;BP;MF;BP;CC;MF;BP;BP;MF;BP;BP;BP;BP;BP;BP;MF;MF;BP;BP;CC;MF;BP;BP;BP;BP;CC;MF;BP;MF;MF;CC;CC;MF;BP;BP;BP;BP;BP;CC;CC;BP;MF;BP;…	biological process involved in interaction with host;plasma membrane raft organization;protein localization to nucleus;regulation of lipid transport;high-density lipoprotein particle binding;cholesterol homeostasis;positive regulation of high-density lipoprotein particle assembly;lipoprotein metabolic process;phosphatidylcholine flippase activity;transmembrane transporter activity;ABC-type polyam…	-	-	-	ABC transporter A family member 3 isoform X2 [Brassica napus]	PF00005.31	ABC transporter	ABC transporter A family member 3 OS=Arabidopsis thaliana OX=3702 GN=ABCA3 PE=2 SV=3	3HWQ5	I	ABC transporter A family member	COG1131	ABC-type multidrug transport system, ATPase component	V	Defense mechanisms	KOG0059	[IR]	Lipid transport and metabolism; General function prediction only;	Lipid exporter ABCA1 and related proteins, ABC superfamily	-
BnaC08G0454800ZS	BnaC08G0454800ZS	1.60461	1.8994	8.69695e-08	4.79648e-05	up	3.48794	3.48147	4.47143	1.30269	0.65824	0.882663	134	117	133	39	26	31	GO:0000139;GO:0033116;GO:0016192;GO:0006621;GO:0005046;GO:0006890;GO:0035437;GO:0005801;GO:0046923;GO:0005789;GO:0006888;GO:0030133;GO:0045015;GO:0030217;GO:0006886;GO:0016020;GO:0038023;GO:0005794;GO:0070231;GO:0005783;GO:0030663;GO:0005793;GO:0015031;	CC;CC;BP;BP;MF;BP;BP;CC;MF;CC;BP;CC;MF;BP;BP;CC;MF;CC;BP;CC;CC;CC;BP;	Golgi membrane;endoplasmic reticulum-Golgi intermediate compartment membrane;vesicle-mediated transport;protein retention in ER lumen;KDEL sequence binding;retrograde vesicle-mediated transport, Golgi to endoplasmic reticulum;maintenance of protein localization in endoplasmic reticulum;cis-Golgi network;ER retention sequence binding;endoplasmic reticulum membrane;endoplasmic reticulum to Golgi ve…	-	-	-	ER lumen protein-retaining receptor erd-2.2 [Brassica napus]	PF00810.22	ER lumen protein retaining receptor	ER lumen protein-retaining receptor OS=Entamoeba histolytica (strain ATCC 30459 / HM-1:IMSS / ABRM) OX=294381 GN=ERD2 PE=3 SV=2	3HX0Y	U	ER lumen protein retaining receptor family protein	-	-	-	-	KOG3106	[U]	Intracellular trafficking, secretion, and vesicular transport;	ER lumen protein retaining receptor	-
BnaC08G0453000ZS	BnaC08G0453000ZS	0.800846	-2.87036	9.10535e-08	4.9565e-05	down	0.189303	0.193147	0.307782	2.78046	0.906576	1.09002	16	15	21	185	79	84	GO:0070062;GO:0000123;GO:0016251;GO:0045176;GO:0030424;GO:0045842;GO:0030157;GO:0019827;GO:0006397;GO:0034501;GO:0006094;GO:0001501;GO:0000776;GO:0000281;GO:0030137;GO:0045504;GO:0005525;GO:0005869;GO:0051642;GO:0015630;GO:0071539;GO:0045159;GO:0043130;GO:0007634;GO:0050772;GO:0005737;GO:0045893;GO:0003729;GO:0038026;GO:0042789;GO:0043065;GO:0000922;GO:0033276;GO:0046540;GO:0008090;GO:0005669;GO:…	CC;CC;MF;BP;CC;BP;BP;BP;BP;BP;BP;BP;CC;BP;CC;MF;MF;CC;BP;CC;BP;MF;MF;BP;BP;CC;BP;MF;BP;BP;BP;CC;CC;CC;BP;CC;CC;CC;CC;MF;CC;MF;MF;MF;BP;BP;BP;BP;BP;BP;BP;BP;MF;CC;BP;BP;CC;BP;CC;BP;BP;BP;CC;CC;BP;BP;BP;BP;BP;CC;CC;BP;BP;BP;MF;BP;BP;BP;MF;BP;CC;BP;BP;BP;BP;CC;BP;CC;BP;MF;BP;CC;CC;BP;BP;BP;BP;MF;CC;CC;BP;BP;BP;BP;CC;BP;BP;CC;BP;BP;CC;CC;BP;CC;BP;MF;MF;CC;BP;CC;BP;BP;BP;MF;BP;CC;BP;CC;BP;BP;BP;BP;BP;…	extracellular exosome;histone acetyltransferase complex;RNA polymerase II general transcription initiation factor activity;apical protein localization;axon;positive regulation of mitotic metaphase/anaphase transition;pancreatic juice secretion;stem cell population maintenance;mRNA processing;protein localization to kinetochore;gluconeogenesis;skeletal system development;kinetochore;mitotic cytoki…	K05236	-	-	PREDICTED: LOW QUALITY PROTEIN: coatomer subunit alpha-1 [Brassica oleracea var. oleracea]	PF04053.18	Coatomer WD associated region	Coatomer subunit alpha-1 OS=Arabidopsis thaliana OX=3702 GN=At1g62020 PE=2 SV=2	3HQCB	U	The coatomer is a cytosolic protein complex that binds to dilysine motifs and reversibly associates with Golgi non- clathrin-coated vesicles, which further mediate biosynthetic protein transport from the ER, via the Golgi up to the trans Golgi network	COG2319	WD40 repeat	R	General function prediction only	KOG0292	[U]	Intracellular trafficking, secretion, and vesicular transport;	Vesicle coat complex COPI, alpha subunit	-
BnaA03G0310000ZS	BnaA03G0310000ZS	2.35644	-2.69285	1.01517e-07	5.45522e-05	down	0.488253	2.07003	2.25357	8.90841	11.2493	8.99681	12	44	42	165	274	193	GO:0046872;	MF;	metal ion binding;	-	-	-	PREDICTED: uncharacterized protein LOC106332509 [Brassica oleracea var. oleracea]	-	-	Heavy metal-associated isoprenylated plant protein 16 OS=Arabidopsis thaliana OX=3702 GN=HIPP16 PE=2 SV=1	3I07K	L	transposition, RNA-mediated	-	-	-	-	-	-	-	-	-
MSTRG.78391.2	MSTRG.78391.2	1.61616	-1.31751	1.30514e-07	6.92466e-05	down	1.0516	1.42083	1.50983	3.30093	2.88602	2.98395	128	152	142	315	361	328	GO:0050832;GO:0019901;GO:1900150;GO:0010555;GO:0002238;GO:0071215;GO:0009651;GO:1902288;GO:0002229;GO:0002237;GO:0032491;GO:0005783;GO:0002758;GO:0006952;GO:0005886;GO:0140426;GO:0002240;GO:0042742;GO:0010150;	BP;MF;BP;BP;BP;BP;BP;BP;BP;BP;BP;CC;BP;BP;CC;BP;BP;BP;BP;	defense response to fungus;protein kinase binding;regulation of defense response to fungus;response to mannitol;response to molecule of fungal origin;cellular response to abscisic acid stimulus;response to salt stress;regulation of defense response to oomycetes;defense response to oomycetes;response to molecule of bacterial origin;detection of molecule of fungal origin;endoplasmic reticulum;innat…	-	-	-	receptor like protein 22-like [Brassica napus]	PF00560.37	Leucine Rich Repeat	Receptor like protein 22 OS=Arabidopsis thaliana OX=3702 GN=RLP22 PE=2 SV=1	KOG0619	U	regulation of response to stimulus	COG4886	Leucine-rich repeat (LRR) protein	K	Transcription	KOG0618	[T]	Signal transduction mechanisms;	Serine/threonine phosphatase 2C containing leucine-rich repeats, similar to SCN circadian oscillatory protein (SCOP)	-
BnaC05G0064000ZS	BnaC05G0064000ZS	2.90203	1.13479	1.42654e-07	7.47416e-05	up	10.2643	8.3674	11.1058	4.60725	3.95515	3.91424	387	277	324	136	154	134	GO:0070062;GO:0032148;GO:0006515;GO:0030424;GO:0014823;GO:0030317;GO:0004857;GO:0048678;GO:0120124;GO:0071548;GO:0005737;GO:0009410;GO:0008340;GO:0071333;GO:0005794;GO:0000324;GO:0009314;GO:0000806;GO:0071236;GO:0010269;GO:0071731;GO:0009536;GO:0009507;GO:0000139;GO:0001520;GO:0051897;GO:0043086;GO:0015036;GO:0000122;GO:0003723;GO:0006890;GO:0042803;GO:0009570;GO:0050832;GO:0015035;GO:0047134;GO:…	CC;BP;BP;CC;BP;BP;MF;BP;CC;BP;CC;BP;BP;BP;CC;CC;BP;CC;BP;BP;BP;CC;CC;CC;CC;BP;BP;MF;BP;MF;BP;MF;CC;BP;MF;MF;BP;BP;CC;CC;BP;BP;MF;CC;MF;MF;MF;MF;BP;CC;BP;CC;BP;BP;BP;BP;CC;BP;MF;CC;BP;BP;BP;BP;BP;BP;BP;CC;BP;BP;MF;BP;CC;BP;BP;BP;BP;BP;BP;BP;BP;BP;BP;MF;CC;MF;CC;MF;BP;CC;BP;CC;BP;	extracellular exosome;activation of protein kinase B activity;protein quality control for misfolded or incompletely synthesized proteins;axon;response to activity;flagellated sperm motility;enzyme inhibitor activity;response to axon injury;membrane fusion priming complex;response to dexamethasone;cytoplasm;response to xenobiotic stimulus;determination of adult lifespan;cellular response to glucos…	-	-	-	thioredoxin-like 1-1, chloroplastic [Brassica napus]	PF00085.24	Thioredoxin	Thioredoxin-like 1-1, chloroplastic OS=Arabidopsis thaliana OX=3702 GN=At1g08570 PE=2 SV=1	3HQ43	O	Thioredoxin	COG3118	Chaperedoxin CnoX, contains thioredoxin-like and TPR-like domains, YbbN/TrxSC family	O	Posttranslational modification, protein turnover, chaperones	KOG0907	[O]	Posttranslational modification, protein turnover, chaperones;	Thioredoxin	-
MSTRG.93550.1	MSTRG.93550.1	1.26752	-2.01391	1.56571e-07	8.10209e-05	down	0.456747	0.91067	0.615673	2.70913	2.13422	2.72425	31	53	32	140	145	162	GO:0000325;GO:0016310;GO:0002758;GO:0006952;GO:0003700;GO:0004674;GO:0061809;GO:0050135;GO:0016887;GO:0009626;GO:0043565;GO:0005524;GO:0071456;GO:0042802;GO:0043531;GO:0009409;GO:0046872;GO:0042742;GO:0005737;GO:0007165;GO:0005634;GO:0009941;	CC;BP;BP;BP;MF;MF;MF;MF;MF;BP;MF;MF;BP;MF;MF;BP;MF;BP;CC;BP;CC;CC;	plant-type vacuole;phosphorylation;innate immune response-activating signaling pathway;defense response;DNA-binding transcription factor activity;protein serine/threonine kinase activity;NAD+ nucleotidase, cyclic ADP-ribose generating;NADP+ nucleosidase activity;ATP hydrolysis activity;plant-type hypersensitive response;sequence-specific DNA binding;ATP binding;cellular response to hypoxia;identi…	-	-	-	disease resistance protein RRS1B-like [Brassica napus]	PF00931.26	NB-ARC domain	Protein DA1-related 4 OS=Arabidopsis thaliana OX=3702 GN=DAR4 PE=1 SV=2	-	-	-	-	-	-	-	-	-	-	-	-
BnaA08G0138300ZS	BnaA08G0138300ZS	4.23151	-1.08944	1.95458e-07	9.99098e-05	down	12.1814	13.4258	12.2097	25.5575	28.0772	21.6535	442	428	343	726	1048	709	GO:0045335;GO:0030424;GO:0005634;GO:0009805;GO:0032259;GO:0080088;GO:0080077;GO:0042424;GO:0005739;GO:0030425;GO:0033799;GO:0080076;GO:0008171;GO:0080078;GO:0043473;GO:0102938;GO:0032502;GO:0005886;GO:0042417;GO:0042409;GO:0005737;GO:0010597;GO:0009274;GO:0102084;GO:0033486;GO:0046872;GO:0009718;GO:0080012;GO:0009809;GO:0017000;GO:0048316;GO:0016206;GO:0008757;GO:0009820;GO:0005829;GO:0016020;GO:…	CC;CC;CC;BP;BP;BP;MF;BP;CC;CC;MF;MF;MF;MF;BP;MF;BP;CC;BP;MF;CC;BP;CC;MF;BP;MF;BP;MF;BP;BP;BP;MF;MF;BP;CC;CC;BP;MF;BP;BP;MF;BP;BP;	phagocytic vesicle;axon;nucleus;coumarin biosynthetic process;methylation;spermidine hydroxycinnamate conjugate biosynthetic process;trihydroxyferuloyl spermidine:S-adenosyl-L-methionine O-methyltransferase activity;catecholamine catabolic process;mitochondrion;dendrite;myricetin 3'-O-methyltransferase activity;caffeoyl CoA:S-adenosyl-L-methionine O-methyltransferase activity;O-methyltransferase …	K00588	ko01110;ko00945;ko00999;ko00941;ko01100;ko00940	Biosynthesis of secondary metabolites;Stilbenoid, diarylheptanoid and gingerol biosynthesis;Podophyllotoxin biosynthesis;Flavonoid biosynthesis;Metabolic pathways;Phenylpropanoid biosynthesis	caffeoyl-CoA O-methyltransferase 1 [Brassica napus]	PF01596.21	O-methyltransferase	Caffeoyl-CoA O-methyltransferase 1 OS=Arabidopsis thaliana OX=3702 GN=CCOAOMT1 PE=1 SV=1	3HRKP	Q	O-methyltransferase	COG4122	tRNA 5-hydroxyU34 O-methylase TrmR/YrrM	J	Translation, ribosomal structure and biogenesis	KOG1663	[Q]	Secondary metabolites biosynthesis, transport and catabolism;	O-methyltransferase	-
BnaA07G0066000ZS	BnaA07G0066000ZS	1.6639	-2.67654	2.09793e-07	0.000105945	down	1.25358	0.798653	0.339136	3.08623	6.42199	5.14912	82	46	18	158	430	303	GO:0045490;GO:0000272;GO:0098552;GO:0009536;GO:0046872;GO:0030570;GO:0042547;GO:0005739;GO:0005886;GO:0009664;GO:0098542;GO:0005829;GO:0071555;GO:0005576;GO:0009624;	BP;BP;CC;CC;MF;MF;BP;CC;CC;BP;BP;CC;BP;CC;BP;	pectin catabolic process;polysaccharide catabolic process;side of membrane;plastid;metal ion binding;pectate lyase activity;cell wall modification involved in multidimensional cell growth;mitochondrion;plasma membrane;plant-type cell wall organization;defense response to other organism;cytosol;cell wall organization;extracellular region;response to nematode;	K01728	ko01100;ko00040	Metabolic pathways;Pentose and glucuronate interconversions	probable pectate lyase 10 [Brassica napus]	PF00544.23	Pectate lyase	Probable pectate lyase 10 OS=Arabidopsis thaliana OX=3702 GN=At3g24670 PE=2 SV=2	3HZ52	G	Pectate lyase	COG3866	Pectate lyase	G	Carbohydrate transport and metabolism	-	-	-	-	-
BnaA09G0077300ZS	BnaA09G0077300ZS	3.55708	-1.46407	2.48572e-07	0.000124035	down	6.77835	7.71175	5.44067	17.3426	18.0156	16.4675	99	99	62	198	270	217	-	-	-	-	-	-	uncharacterized protein BNAA09G05880D [Brassica napus]	PF01476.24	LysM domain	-	3HUQS	S	Peptidoglycan-binding LysM domain-containing protein	-	-	-	-	-	-	-	-	-
BnaA09G0418100ZS	BnaA09G0418100ZS	6.69444	-0.908635	2.62176e-07	0.000129283	nonsig	84.0877	72.4954	76.6914	145.295	144.054	118.7	5601	4246	3953	7579	9873	7140	GO:0005262;GO:1904680;GO:0070843;GO:0039019;GO:0008320;GO:0006614;GO:0030670;GO:0022857;GO:0045048;GO:0030867;GO:0005784;GO:0030433;GO:0071261;GO:0045047;GO:0071256;GO:0015450;GO:0005886;GO:0005789;GO:0044743;GO:0021986;GO:0006620;GO:0043022;GO:0006605;GO:0006616;GO:0006613;GO:0007029;GO:0005048;GO:0030970;GO:0034341;GO:0016020;GO:0065002;GO:0000324;GO:0005783;GO:0031204;GO:1903561;GO:0015031;GO:…	MF;MF;BP;BP;MF;BP;CC;MF;BP;CC;CC;BP;CC;BP;CC;MF;CC;CC;BP;BP;BP;MF;BP;BP;BP;BP;MF;BP;BP;CC;BP;CC;CC;BP;CC;BP;BP;	calcium channel activity;peptide transmembrane transporter activity;misfolded protein transport;pronephric nephron development;protein transmembrane transporter activity;SRP-dependent cotranslational protein targeting to membrane;phagocytic vesicle membrane;transmembrane transporter activity;protein insertion into ER membrane;rough endoplasmic reticulum membrane;Sec61 translocon complex;obsolete …	K10956	ko04145;ko04141;ko03060	Phagosome;Protein processing in endoplasmic reticulum;Protein export	uncharacterized protein LOC108807693 [Raphanus sativus]	PF00344.24	SecY	Protein transport protein Sec61 subunit alpha OS=Dictyostelium discoideum OX=44689 GN=sec61a PE=3 SV=1	3HWYU	OU	Belongs to the SecY SEC61-alpha family	COG0201	Preprotein translocase subunit SecY	U	Intracellular trafficking, secretion, and vesicular transport	KOG1373	[UO]	Intracellular trafficking, secretion, and vesicular transport; Posttranslational modification, protein turnover, chaperones;	Transport protein Sec61, alpha subunit	-
BnaA09G0139500ZS	BnaA09G0139500ZS	2.02905	1.84811	3.13346e-07	0.00015272	up	5.89973	5.26401	6.34421	1.53527	0.955316	1.93735	189	148	157	39	32	56	-	-	-	-	-	-	uncharacterized protein LOC125577815 [Brassica napus]	-	-	-	-	-	-	-	-	-	-	-	-	-	-	-
BnaA02G0220700ZS	BnaA02G0220700ZS	1.18881	-2.84187	3.1824e-07	0.000153322	down	0.418357	0.210002	0.692645	1.28569	3.82795	3.37808	23	10	29	55	213	165	-	-	-	-	-	-	UPF0725 protein At2g20620-like [Brassica napus]	PF04776.16	Protein MS5	UPF0725 protein At2g20620 OS=Arabidopsis thaliana OX=3702 GN=At2g20620 PE=2 SV=1	-	-	-	-	-	-	-	-	-	-	-	-
BnaC07G0468200ZS	BnaC07G0468200ZS	5.44976	-2.02403	3.32675e-07	0.000158455	down	15.3142	28.9052	24.1079	81.6364	57.8794	115.949	671	1114	817	2800	2609	4586	GO:0042752;GO:0042538;GO:0005634;GO:0000325;GO:0006952;GO:0048046;GO:0009664;GO:0005739;GO:0097167;GO:0009409;GO:0099503;GO:0009651;GO:0042744;GO:0006979;GO:0071456;GO:0020037;GO:0004601;GO:0010089;GO:0048658;GO:0009269;GO:0005509;GO:0010043;GO:0009877;GO:0140825;GO:0080001;GO:0005886;GO:0050832;GO:0005737;GO:0009044;GO:0009416;GO:0003729;GO:0009808;GO:0010228;GO:0009506;GO:0046872;GO:0045730;GO:…	BP;BP;CC;CC;BP;CC;BP;CC;BP;BP;CC;BP;BP;BP;BP;MF;MF;BP;BP;BP;MF;BP;BP;MF;BP;CC;BP;CC;MF;BP;MF;BP;BP;CC;MF;BP;BP;BP;BP;BP;CC;BP;BP;CC;BP;CC;BP;CC;CC;CC;BP;BP;BP;BP;BP;	regulation of circadian rhythm;hyperosmotic salinity response;nucleus;plant-type vacuole;defense response;apoplast;plant-type cell wall organization;mitochondrion;circadian regulation of translation;response to cold;secretory vesicle;response to salt stress;hydrogen peroxide catabolic process;response to oxidative stress;cellular response to hypoxia;heme binding;peroxidase activity;xylem developm…	K00430	ko01110;ko01100;ko00940	Biosynthesis of secondary metabolites;Metabolic pathways;Phenylpropanoid biosynthesis	peroxidase 44 [Brassica napus]	PF00141.27	Peroxidase	Peroxidase 44 OS=Arabidopsis thaliana OX=3702 GN=PER44 PE=2 SV=1	3HZ2Q	W	Belongs to the peroxidase family. Classical plant (class III) peroxidase subfamily	-	-	-	-	-	-	-	-	-
BnaA01G0043300ZS	BnaA01G0043300ZS	4.44788	-1.46365	3.52603e-07	0.00016606	down	12.7248	14.8939	11.2411	41.7744	31.1091	28.4651	148	153	102	380	372	299	-	-	-	-	-	-	uncharacterized protein LOC106370782 [Brassica napus]	-	-	-	-	-	-	-	-	-	-	-	-	-	-	-
BnaC03G0114300ZS	BnaC03G0114300ZS	6.14458	-1.05749	3.59202e-07	0.000167288	down	50.1025	40.5403	62.1592	107.605	108.142	77.8917	1844	1312	1770	3102	4096	2589	GO:0070062;GO:0030027;GO:0003785;GO:0014823;GO:0043066;GO:0022604;GO:0006952;GO:0033206;GO:0031674;GO:0070301;GO:1990904;GO:0051014;GO:0061001;GO:0000281;GO:0061836;GO:0006897;GO:0010591;GO:0030838;GO:0000915;GO:0021766;GO:2000814;GO:0030479;GO:0007010;GO:0048749;GO:0040011;GO:0005737;GO:0071689;GO:0050714;GO:0010592;GO:0030496;GO:0007015;GO:0040019;GO:0002758;GO:0005615;GO:0032232;GO:0031252;GO:…	CC;CC;MF;BP;BP;BP;BP;BP;CC;BP;CC;BP;BP;BP;CC;BP;BP;BP;BP;BP;BP;CC;BP;BP;BP;CC;BP;BP;BP;CC;BP;BP;BP;CC;BP;CC;BP;CC;CC;MF;CC;BP;BP;CC;BP;CC;CC;CC;CC;BP;CC;BP;MF;BP;BP;BP;BP;BP;BP;BP;CC;CC;CC;BP;CC;BP;BP;BP;CC;CC;BP;CC;BP;MF;CC;CC;BP;MF;CC;BP;CC;BP;BP;MF;BP;MF;BP;CC;BP;BP;BP;BP;BP;CC;BP;BP;CC;BP;CC;BP;BP;BP;MF;BP;BP;BP;BP;BP;BP;BP;BP;BP;BP;MF;BP;CC;CC;MF;BP;BP;BP;CC;CC;BP;BP;BP;CC;CC;BP;BP;CC;BP;CC;…	extracellular exosome;lamellipodium;actin monomer binding;response to activity;negative regulation of apoptotic process;regulation of cell morphogenesis;defense response;meiotic cytokinesis;I band;cellular response to hydrogen peroxide;ribonucleoprotein complex;actin filament severing;regulation of dendritic spine morphogenesis;mitotic cytokinesis;intranuclear rod;endocytosis;regulation of lamell…	K05765	-	-	actin-depolymerizing factor 4 [Brassica napus]	PF00241.24	Cofilin/tropomyosin-type actin-binding protein	Actin-depolymerizing factor 4 OS=Arabidopsis thaliana OX=3702 GN=ADF4 PE=1 SV=2	3HVJW	Z	Belongs to the actin-binding proteins ADF family	-	-	-	-	KOG1735	[Z]	Cytoskeleton;	Actin depolymerizing factor	-
BnaA03G0429300ZS	BnaA03G0429300ZS	2.0667	-1.36951	4.33203e-07	0.000199535	down	1.79391	2.192	2.04531	4.93463	4.82881	4.75378	62	67	55	134	172	148	-	-	-	-	-	-	UPF0725 protein EMB2204-like [Raphanus sativus]	PF04776.16	Protein MS5	UPF0725 protein At3g25080 OS=Arabidopsis thaliana OX=3702 GN=At3g25080 PE=2 SV=1	-	-	-	-	-	-	-	-	-	-	-	-
BnaC03G0496200ZS	BnaC03G0496200ZS	3.65276	-1.35223	4.68025e-07	0.000213231	down	6.31051	9.26579	6.84254	17.3441	19.4825	16.9008	504	650	423	1084	1599	1218	GO:0016020;GO:0000741;GO:0009651;GO:0010197;GO:0005739;	CC;BP;BP;BP;CC;	membrane;karyogamy;response to salt stress;polar nucleus fusion;mitochondrion;	-	-	-	protein NUCLEAR FUSION DEFECTIVE 4 [Brassica napus]	PF06813.17	Nodulin-like	Protein NUCLEAR FUSION DEFECTIVE 4 OS=Arabidopsis thaliana OX=3702 GN=NFD4 PE=3 SV=1	3HR8C	S	Nodulin-like	-	-	-	-	-	-	-	-	-
MSTRG.56270.4	MSTRG.56270.4	0.70856	-2.37806	4.96217e-07	0.000223645	down	0.264696	0.20092	0.262885	1.42749	1.70016	0.514866	35	24	27	146	229	61	-	-	-	-	-	-	uncharacterized protein LOC106390984 [Brassica napus]	PF04937.19	Protein of unknown function (DUF 659)	-	3HN46	S	Protein of unknown function (DUF 659)	-	-	-	-	-	-	-	-	-
BnaA04G0166900ZS	BnaA04G0166900ZS	1.30191	1.46587	5.09931e-07	0.00022738	up	2.66647	2.0341	2.50733	0.816322	0.721696	0.841119	173	116	126	42	49	50	GO:0071361;GO:0051592;GO:0000086;GO:0030424;GO:0071940;GO:0043066;GO:0010119;GO:0014823;GO:0050995;GO:0009631;GO:0004679;GO:0009594;GO:0005975;GO:0016301;GO:0005641;GO:1904179;GO:0061351;GO:0007165;GO:0004712;GO:0070301;GO:0099172;GO:0140648;GO:0006814;GO:0061744;GO:1903955;GO:0008610;GO:0009651;GO:0061762;GO:0019395;GO:0003682;GO:0071456;GO:0001666;GO:0042557;GO:0010514;GO:0010628;GO:0070050;GO:…	BP;BP;BP;CC;BP;BP;BP;BP;BP;BP;MF;BP;BP;MF;CC;BP;BP;BP;MF;BP;BP;BP;BP;BP;BP;BP;BP;BP;BP;MF;BP;BP;MF;BP;BP;BP;BP;CC;BP;BP;BP;MF;BP;CC;CC;BP;BP;BP;BP;BP;BP;MF;BP;BP;BP;BP;BP;BP;BP;BP;BP;BP;BP;BP;CC;BP;BP;BP;BP;BP;CC;BP;BP;BP;BP;MF;BP;BP;BP;BP;MF;BP;BP;BP;BP;BP;CC;CC;CC;MF;BP;BP;BP;BP;BP;BP;MF;BP;BP;MF;BP;BP;BP;CC;BP;BP;MF;BP;BP;BP;BP;BP;BP;BP;BP;CC;BP;CC;BP;MF;BP;BP;BP;BP;MF;BP;BP;CC;CC;BP;BP;MF;BP;…	cellular response to ethanol;response to calcium ion;G2/M transition of mitotic cell cycle;axon;fungal-type cell wall assembly;negative regulation of apoptotic process;regulation of stomatal movement;response to activity;negative regulation of lipid catabolic process;cold acclimation;AMP-activated protein kinase activity;detection of nutrient;carbohydrate metabolic process;kinase activity;nuclear…	K07198	-	-	CBL-interacting serine/threonine-protein kinase 16 [Brassica napus]	PF00069.29	Protein kinase domain	CBL-interacting serine/threonine-protein kinase 16 OS=Arabidopsis thaliana OX=3702 GN=CIPK16 PE=1 SV=1	3HZ1F	T	CBL-interacting serine threonine-protein kinase	COG0515	Serine/threonine protein kinase	T	Signal transduction mechanisms	KOG0583	[T]	Signal transduction mechanisms;	Serine/threonine protein kinase	-
BnaC05G0407200ZS	BnaC05G0407200ZS	3.77796	-1.6289	5.2454e-07	0.000230914	down	5.58457	9.69251	7.2791	19.2053	20.7139	25.054	273	417	276	735	1041	1105	GO:0033761;GO:0009805;GO:0006952;GO:0009413;GO:0045544;GO:0052635;GO:0102312;GO:0071456;GO:0009739;GO:0045487;GO:0009620;GO:0005737;GO:0033760;GO:0009753;GO:0009835;GO:0097295;GO:1900366;GO:0009699;GO:0005794;GO:0102803;GO:0009617;GO:0009815;GO:0102805;GO:0009727;GO:0010030;GO:0103056;GO:0005507;GO:0052634;GO:0032259;GO:0030782;GO:0048575;GO:2000022;GO:0045486;GO:0033759;GO:1990641;GO:0102804;GO:…	MF;BP;BP;BP;MF;MF;MF;BP;BP;BP;BP;CC;MF;BP;BP;BP;BP;BP;CC;MF;BP;MF;MF;BP;BP;MF;MF;MF;BP;MF;BP;BP;MF;MF;BP;MF;BP;MF;BP;MF;MF;CC;BP;BP;BP;MF;BP;BP;BP;BP;BP;BP;MF;MF;BP;MF;CC;MF;BP;BP;MF;BP;BP;BP;BP;BP;BP;CC;BP;BP;BP;BP;MF;MF;BP;MF;MF;BP;MF;BP;CC;BP;MF;BP;BP;BP;MF;CC;MF;MF;CC;MF;MF;CC;BP;BP;BP;	mugineic-acid 3-dioxygenase activity;coumarin biosynthetic process;defense response;response to flooding;gibberellin 20-oxidase activity;C-20 gibberellin 2-beta-dioxygenase activity;4-coumaroyl 2'-hydroxylase activity;cellular response to hypoxia;response to gibberellin;gibberellin catabolic process;response to fungus;cytoplasm;2'-deoxymugineic-acid 2'-dioxygenase activity;response to jasmonic ac…	-	-	-	flavonol synthase/flavanone 3-hydroxylase-like [Brassica napus]	PF03171.24	2OG-Fe(II) oxygenase superfamily	Protein LATERAL BRANCHING OXIDOREDUCTASE 1 OS=Arabidopsis thaliana OX=3702 GN=LBO1 PE=1 SV=1	3HXR0	Q	Flavonol synthase flavanone	COG3491	Isopenicillin N synthase and related dioxygenases	Q	Secondary metabolites biosynthesis, transport and catabolism	KOG0143	[QR]	Secondary metabolites biosynthesis, transport and catabolism; General function prediction only;	Iron/ascorbate family oxidoreductases	-
BnaC09G0517500ZS	BnaC09G0517500ZS	1.45522	2.36884	5.28874e-07	0.000230914	up	3.91508	3.81924	3.27338	0.234056	0.916316	0.775476	173	148	112	9	42	31	GO:0016310;GO:0047940;GO:0008266;GO:0048868;GO:0046872;GO:0005975;GO:0006020;GO:0042546;GO:0005524;	BP;MF;MF;BP;MF;BP;BP;BP;MF;	phosphorylation;glucuronokinase activity;poly(U) RNA binding;pollen tube development;metal ion binding;carbohydrate metabolic process;inositol metabolic process;cell wall biogenesis;ATP binding;	K16190	ko00040;ko01100;ko00520;ko00053	Pentose and glucuronate interconversions;Metabolic pathways;Amino sugar and nucleotide sugar metabolism;Ascorbate and aldarate metabolism	probable glucuronokinase 2 [Brassica napus]	PF08544.17	GHMP kinases C terminal	Probable glucuronokinase 2 OS=Arabidopsis thaliana OX=3702 GN=GLCAK2 PE=2 SV=1	3GFZE	G	glucuronokinase	COG1577	Mevalonate kinase	I	Lipid transport and metabolism	-	-	-	-	-
BnaA01G0134000ZS	BnaA01G0134000ZS	4.50302	-1.34506	8.2352e-07	0.000355854	down	11.5854	16.676	14.0605	30.3858	34.7271	35.1775	163	206	153	333	501	445	GO:0004252;GO:0008236;GO:0006508;	MF;MF;BP;	serine-type endopeptidase activity;serine-type peptidase activity;proteolysis;	-	-	-	subtilisin-like protease SBT2.5 [Brassica napus]	PF05922.20	Peptidase inhibitor I9	Subtilisin-like protease SBT2.5 OS=Arabidopsis thaliana OX=3702 GN=SBT2.5 PE=2 SV=1	3I18W	S	Peptidase inhibitor I9	-	-	-	-	-	-	-	-	-
BnaC07G0541500ZS	BnaC07G0541500ZS	3.79644	-1.33327	8.42464e-07	0.000357482	down	9.83805	7.58706	7.96727	20.0338	25.726	14.3374	807	548	506	1287	2171	1062	GO:0009805;GO:0010584;GO:0006952;GO:0103097;GO:0106144;GO:0047082;GO:0071456;GO:0009684;GO:0010120;GO:0016705;GO:0009506;GO:0010333;GO:0102170;GO:0009753;GO:0009835;GO:0019756;GO:0106240;GO:0009699;GO:0051791;GO:0006587;GO:0009641;GO:0009617;GO:0051762;GO:0080027;GO:0035833;GO:0032259;GO:0016114;GO:0102171;GO:0006569;GO:0010208;GO:0051792;GO:0042179;GO:0050832;GO:0009733;GO:0009808;GO:0010132;GO:…	BP;BP;BP;MF;MF;MF;BP;BP;BP;MF;CC;MF;MF;BP;BP;BP;MF;BP;BP;BP;BP;BP;BP;BP;BP;BP;BP;MF;BP;BP;BP;BP;BP;BP;BP;BP;MF;MF;MF;BP;MF;MF;BP;MF;CC;MF;BP;BP;BP;MF;MF;CC;CC;BP;MF;CC;MF;BP;CC;BP;CC;BP;MF;CC;MF;BP;BP;BP;MF;MF;BP;BP;BP;MF;MF;MF;BP;MF;CC;BP;BP;BP;MF;BP;BP;BP;BP;BP;BP;CC;CC;BP;BP;BP;MF;BP;MF;BP;BP;MF;BP;MF;	coumarin biosynthetic process;pollen exine formation;defense response;CYP79F1 trihomomethionine monooxygenase activity;fraxetin 5-hydroxylase activity;3,9-dihydroxypterocarpan 6a-monooxygenase activity;cellular response to hypoxia;indoleacetic acid biosynthetic process;camalexin biosynthetic process;oxidoreductase activity, acting on paired donors, with incorporation or reduction of molecular oxy…	K11812	ko01210;ko00380;ko00966;ko01110;ko01100	2-Oxocarboxylic acid metabolism;Tryptophan metabolism;Glucosinolate biosynthesis;Biosynthesis of secondary metabolites;Metabolic pathways	cytochrome P450 79B1 [Brassica napus]	PF00067.26	Cytochrome P450	Cytochrome P450 79B1 OS=Sinapis alba OX=3728 GN=CYP79B1 PE=2 SV=1	3HY35	Q	Belongs to the cytochrome P450 family	COG2124	Cytochrome P450	QV	-	KOG0156	[Q]	Secondary metabolites biosynthesis, transport and catabolism;	Cytochrome P450 CYP2 subfamily	-
MSTRG.78917.1	MSTRG.78917.1	2.23524	-2.08216	8.44345e-07	0.000357482	down	0.820062	2.01838	2.7192	6.46257	6.79571	8.16612	95	205	243	584	806	850	GO:0009506;GO:1901684;GO:0006817;GO:0009873;GO:0005773;GO:0005794;GO:1901683;GO:0009723;GO:0005315;GO:0016036;GO:0015114;GO:0005886;GO:0016020;GO:0015293;GO:0009610;GO:0080187;	CC;BP;BP;BP;CC;CC;MF;BP;MF;BP;MF;CC;CC;MF;BP;BP;	plasmodesma;arsenate ion transmembrane transport;phosphate ion transport;ethylene-activated signaling pathway;vacuole;Golgi apparatus;arsenate ion transmembrane transporter activity;response to ethylene;phosphate transmembrane transporter activity;cellular response to phosphate starvation;obsolete phosphate ion transmembrane transporter activity;plasma membrane;membrane;symporter activity;respons…	-	-	-	inorganic phosphate transporter 1-4 [Brassica napus]	PF00083.28	Sugar (and other) transporter	Inorganic phosphate transporter 1-4 OS=Arabidopsis thaliana OX=3702 GN=PHT1-4 PE=1 SV=1	3HXCA	P	carbohydrate transmembrane transporter inorganic phosphate transmembrane transporter phosphate transmembrane transporter sugar hydrogen symporter	COG0477	MFS family permease, includes anhydromuropeptide permease AmpG	GEPR	-	KOG0252	[P]	Inorganic ion transport and metabolism;	Inorganic phosphate transporter	-
BnaA03G0483900ZS	BnaA03G0483900ZS	0.631548	-2.3286	9.56991e-07	0.000397349	down	0.225696	0.200167	0.219727	1.17038	0.53703	1.30985	27	21	20	107	65	139	GO:0071361;GO:0070062;GO:0043621;GO:0042445;GO:0009723;GO:0071276;GO:0010119;GO:0042335;GO:1990451;GO:0001659;GO:0043066;GO:0006952;GO:0042338;GO:1902600;GO:0007165;GO:0012505;GO:0033198;GO:0014043;GO:0016477;GO:2000573;GO:0052851;GO:1990782;GO:0005769;GO:0071456;GO:0001666;GO:0000166;GO:0046330;GO:0051591;GO:0070821;GO:0005737;GO:0072592;GO:1904385;GO:0009410;GO:0010575;GO:0045730;GO:0022626;GO:…	BP;CC;MF;BP;BP;BP;BP;BP;BP;BP;BP;BP;BP;BP;BP;CC;BP;BP;BP;BP;MF;MF;CC;BP;BP;MF;BP;BP;CC;CC;BP;BP;BP;BP;BP;CC;BP;BP;BP;BP;BP;BP;BP;BP;CC;CC;CC;MF;BP;BP;BP;CC;BP;MF;CC;BP;MF;MF;BP;BP;CC;CC;BP;CC;BP;BP;BP;BP;BP;BP;BP;BP;CC;BP;CC;MF;BP;BP;BP;BP;BP;BP;BP;BP;MF;BP;BP;BP;CC;BP;BP;BP;BP;MF;BP;BP;CC;BP;CC;BP;BP;CC;MF;BP;BP;BP;BP;BP;MF;CC;BP;BP;BP;BP;CC;CC;BP;BP;BP;CC;MF;BP;BP;BP;MF;BP;MF;MF;CC;BP;BP;CC;CC;…	cellular response to ethanol;extracellular exosome;obsolete protein self-association;hormone metabolic process;response to ethylene;cellular response to cadmium ion;regulation of stomatal movement;cuticle development;cellular stress response to acidic pH;temperature homeostasis;negative regulation of apoptotic process;defense response;cuticle development involved in collagen and cuticulin-based c…	K13447	ko04016;ko04626	MAPK signaling pathway - plant;Plant-pathogen interaction	putative respiratory burst oxidase homolog protein G [Brassica napus]	PF08030.16	Ferric reductase NAD binding domain	Putative respiratory burst oxidase homolog protein G OS=Arabidopsis thaliana OX=3702 GN=RBOHG PE=3 SV=2	3HN52	PQ	respiratory burst oxidase	COG5126	Ca2+-binding protein, EF-hand superfamily	T	Signal transduction mechanisms	KOG0039	[PQ]	Inorganic ion transport and metabolism; Secondary metabolites biosynthesis, transport and catabolism;	Ferric reductase, NADH/NADPH oxidase and related proteins	-
BnaC09G0027100ZS	BnaC09G0027100ZS	5.3913	-0.86415	9.57468e-07	0.000397349	nonsig	33.4773	29.6111	31.5059	51.7048	59.4803	48.9818	2493	1939	1815	3015	4557	3293	GO:0035694;GO:0006465;GO:0006515;GO:0010498;GO:0000281;GO:0009651;GO:0034551;GO:0030433;GO:0005750;GO:0030150;GO:0005737;GO:0031942;GO:0005838;GO:0043273;GO:0007005;GO:0008219;GO:0005794;GO:0022624;GO:0032979;GO:0005741;GO:0032991;GO:0009617;GO:0008540;GO:0002237;GO:0043335;GO:0065003;GO:0010154;GO:0045335;GO:0010431;GO:0005758;GO:0009409;GO:0000502;GO:0008566;GO:0003924;GO:0003723;GO:0043921;GO:…	BP;BP;BP;BP;BP;BP;BP;BP;CC;BP;CC;CC;CC;MF;BP;BP;CC;CC;BP;CC;CC;BP;CC;BP;BP;BP;BP;CC;BP;CC;BP;CC;MF;MF;MF;BP;BP;BP;MF;CC;BP;MF;CC;MF;CC;BP;CC;CC;BP;BP;BP;MF;CC;MF;CC;BP;MF;BP;BP;BP;MF;BP;BP;CC;BP;MF;CC;BP;CC;CC;BP;MF;BP;CC;CC;BP;BP;CC;CC;CC;CC;CC;BP;BP;BP;MF;CC;BP;CC;BP;BP;CC;MF;MF;CC;BP;CC;MF;BP;CC;CC;	mitochondrial protein catabolic process;signal peptide processing;protein quality control for misfolded or incompletely synthesized proteins;proteasomal protein catabolic process;mitotic cytokinesis;response to salt stress;mitochondrial respiratory chain complex III assembly;obsolete ubiquitin-dependent ERAD pathway;obsolete mitochondrial respiratory chain complex III;protein import into mitochon…	-	-	-	AAA-ATPase At3g28510-like [Brassica napus]	PF14363.10	Domain associated at C-terminal with AAA	AAA-ATPase At3g28510 OS=Arabidopsis thaliana OX=3702 GN=At3g28510 PE=2 SV=1	3HX6G	O	Domain associated at C-terminal with AAA	COG1222	ATP-dependent 26S proteasome regulatory subunit	O	Posttranslational modification, protein turnover, chaperones	KOG0743	[O]	Posttranslational modification, protein turnover, chaperones;	AAA+-type ATPase	-
BnaA01G0421800ZS	BnaA01G0421800ZS	5.2986	-1.91958	9.69898e-07	0.000398561	down	11.5188	27.2705	24.9215	62.015	68.874	91.0253	594	1235	993	2501	3650	4233	GO:0046475;GO:0000287;GO:0006629;GO:0071456;GO:0030643;GO:0009536;GO:0009507;GO:0007519;GO:0047395;GO:0006071;GO:0046872;GO:2001070;GO:0047389;GO:0005829;GO:0071555;GO:0005576;GO:0005737;GO:0008889;	BP;MF;BP;BP;BP;CC;CC;BP;MF;BP;MF;MF;MF;CC;BP;CC;CC;MF;	glycerophospholipid catabolic process;magnesium ion binding;lipid metabolic process;cellular response to hypoxia;intracellular phosphate ion homeostasis;plastid;chloroplast;skeletal muscle tissue development;glycerophosphoinositol glycerophosphodiesterase activity;glycerol metabolic process;metal ion binding;starch binding;glycerophosphocholine phosphodiesterase activity;cytosol;cell wall organiz…	-	ko00564	Glycerophospholipid metabolism	PREDICTED: glycerophosphodiester phosphodiesterase GDPD1, chloroplastic [Brassica oleracea var. oleracea]	PF03009.21	Glycerophosphoryl diester phosphodiesterase family	Glycerophosphodiester phosphodiesterase GDPD1, chloroplastic OS=Arabidopsis thaliana OX=3702 GN=GDPD1 PE=1 SV=1	3HXUU	C	glycerophosphodiester phosphodiesterase	COG0584	Glycerophosphoryl diester phosphodiesterase	I	Lipid transport and metabolism	KOG2421	[R]	General function prediction only;	Predicted starch-binding protein	-
BnaC09G0488600ZS	BnaC09G0488600ZS	3.33662	-1.36284	1.02533e-06	0.00041725	down	4.42171	5.53651	7.8709	15.5409	12.7741	13.841	95	104	130	259	280	266	-	-	-	-	-	-	glycine-rich protein A3-like isoform X2 [Brassica napus]	PF09849.13	Uncharacterized protein conserved in bacteria (DUF2076)	-	3I0N5	S	glycine-rich protein	-	-	-	-	-	-	-	-	-
MSTRG.12202.14	MSTRG.12202.14	1.02609	1.48809	1.05685e-06	0.000425939	up	1.59499	1.50371	1.95663	0.504089	0.703019	0.449752	133	111	127	33	61	34	-	-	-	-	-	-	ribosomal RNA small subunit methyltransferase F-like isoform X2 [Brassica napus]	-	-	-	3HSJ5	J	Belongs to the class I-like SAM-binding methyltransferase superfamily. RsmB NOP family	-	-	-	-	KOG2198	[J]	Translation, ribosomal structure and biogenesis;	tRNA cytosine-5-methylases and related enzymes of the NOL1/NOP2/sun superfamily	-
BnaA01G0421900ZS	BnaA01G0421900ZS	0.53269	-2.55258	1.2047e-06	0.000480903	down	0.054499	0.153273	0.239403	0.691002	0.799699	0.998013	6	13	18	50	76	84	GO:0033306;GO:0009507;GO:1904963;GO:0010866;GO:0004144;GO:0010150;GO:0010287;GO:0006995;GO:0019432;GO:0090693;	BP;CC;BP;BP;MF;BP;CC;BP;BP;BP;	phytol metabolic process;chloroplast;regulation of phytol biosynthetic process;regulation of triglyceride biosynthetic process;diacylglycerol O-acyltransferase activity;leaf senescence;plastoglobule;cellular response to nitrogen starvation;triglyceride biosynthetic process;plant organ senescence;	K27538	-	-	PREDICTED: acyltransferase-like protein At3g26840, chloroplastic isoform X1 [Brassica oleracea var. oleracea]	PF12697.11	Alpha/beta hydrolase family	Phytyl ester synthase 2, chloroplastic OS=Arabidopsis thaliana OX=3702 GN=PES2 PE=1 SV=1	3HXRA	I	Esterase lipase thioesterase family protein	COG2267	Lysophospholipase, alpha-beta hydrolase superfamily	I	Lipid transport and metabolism	-	-	-	-	-
BnaC05G0110700ZS	BnaC05G0110700ZS	4.14962	0.897694	1.29205e-06	0.000509526	nonsig	21.4363	23.0801	26.8299	10.9523	13.1878	11.2596	1461	1383	1415	585	925	693	GO:0009723;GO:0006952;GO:0007165;GO:0070301;GO:0047484;GO:0009651;GO:0071456;GO:0009739;GO:0000976;GO:1900056;GO:0010120;GO:0009620;GO:0034605;GO:0005737;GO:0009864;GO:0045893;GO:0010228;GO:0009753;GO:0005516;GO:0031347;GO:0010508;GO:0050896;GO:0002758;GO:1990841;GO:0010104;GO:0009941;GO:0043531;GO:0009408;GO:0009617;GO:0002237;GO:0009793;GO:1900425;GO:0009788;GO:0009507;GO:1901141;GO:1905034;GO:…	BP;BP;BP;BP;BP;BP;BP;BP;MF;BP;BP;BP;BP;CC;BP;BP;BP;BP;MF;BP;BP;BP;BP;MF;BP;CC;MF;BP;BP;BP;BP;BP;BP;CC;BP;BP;BP;BP;BP;CC;BP;MF;BP;BP;MF;BP;BP;BP;MF;BP;BP;BP;BP;MF;MF;BP;BP;BP;MF;BP;BP;BP;BP;BP;BP;BP;BP;CC;BP;CC;BP;BP;BP;BP;BP;BP;MF;BP;BP;BP;BP;BP;BP;BP;BP;BP;BP;BP;BP;BP;BP;BP;BP;MF;BP;BP;BP;MF;CC;BP;BP;BP;BP;BP;MF;BP;BP;BP;MF;MF;BP;BP;BP;BP;BP;BP;BP;BP;BP;BP;BP;BP;BP;BP;	response to ethylene;defense response;signal transduction;cellular response to hydrogen peroxide;regulation of response to osmotic stress;response to salt stress;cellular response to hypoxia;response to gibberellin;transcription cis-regulatory region binding;negative regulation of leaf senescence;camalexin biosynthetic process;response to fungus;cellular response to heat;cytoplasm;induced systemi…	-	-	-	probable WRKY transcription factor 4 [Brassica napus]	PF03106.19	WRKY DNA -binding domain	Probable WRKY transcription factor 4 OS=Arabidopsis thaliana OX=3702 GN=WRKY4 PE=1 SV=2	3HYUJ	K	Transcription factor	-	-	-	-	-	-	-	-	WRKY
BnaC05G0547100ZS	BnaC05G0547100ZS	3.77366	-1.14183	1.30071e-06	0.000509526	down	9.28112	8.72239	8.4663	16.848	20.7657	16.8058	156	129	110	222	359	255	-	-	-	-	-	-	late embryogenesis abundant protein At5g17165-like [Brassica napus]	PF03242.17	Late embryogenesis abundant protein	Late embryogenesis abundant protein At5g17165 OS=Arabidopsis thaliana OX=3702 GN=At5g17165 PE=3 SV=1	3HV0Q	-	-	-	-	-	-	-	-	-	-	-
MSTRG.22633.1	MSTRG.22633.1	1.54446	-1.74157	1.36435e-06	0.000526582	down	1.05317	0.623461	1.48979	3.82462	2.59194	3.28299	65	34	71	183	163	181	GO:0006508;GO:0070012;GO:0004175;GO:0005576;	BP;MF;MF;CC;	proteolysis;oligopeptidase activity;endopeptidase activity;extracellular region;	-	-	-	uncharacterized protein BNAANNG19260D [Brassica napus]	PF03080.19	Neprosin	Protein neprosin OS=Nepenthes x ventrata OX=1744888 PE=1 SV=1	3HVVZ	S	Encoded by	-	-	-	-	-	-	-	-	-
BnaA10G0297200ZS	BnaA10G0297200ZS	1.0098	-1.46379	1.36997e-06	0.000526582	down	0.462524	0.521151	0.839021	1.44164	1.71591	1.45708	51	50	71	123	192	143	GO:1900425;GO:0006470;GO:0005634;GO:0005758;GO:0006952;GO:0004741;GO:0005739;GO:0005759;GO:0042093;GO:0009819;GO:1900036;GO:0042594;GO:1900056;GO:0005509;GO:0005886;GO:0035970;GO:0006355;GO:0005737;GO:0048366;GO:0046872;GO:0004722;GO:0016791;GO:0019909;GO:0044877;GO:0017018;GO:0016311;GO:0045253;GO:0009933;GO:0016020;GO:0000226;GO:0000287;GO:0005543;GO:0045926;GO:0006091;GO:0010074;GO:0070262;GO:…	BP;BP;CC;CC;BP;MF;CC;CC;BP;BP;BP;BP;BP;MF;CC;BP;BP;CC;BP;MF;MF;MF;MF;MF;MF;BP;CC;BP;CC;BP;MF;MF;BP;BP;BP;BP;BP;	negative regulation of defense response to bacterium;protein dephosphorylation;nucleus;mitochondrial intermembrane space;defense response;[pyruvate dehydrogenase (acetyl-transferring)]-phosphatase activity;mitochondrion;mitochondrial matrix;T-helper cell differentiation;drought recovery;positive regulation of cellular response to heat;response to starvation;negative regulation of leaf senescence;…	-	-	-	probable protein phosphatase 2C 66 [Brassica rapa]	PF00481.25	Protein phosphatase 2C	Probable protein phosphatase 2C 66 OS=Arabidopsis thaliana OX=3702 GN=PLL2 PE=2 SV=1	3HYUS	T	phosphatase	-	-	-	-	KOG0700	[T]	Signal transduction mechanisms;	Protein phosphatase 2C/pyruvate dehydrogenase (lipoamide) phosphatase	-
BnaA01G0025100ZS	BnaA01G0025100ZS	2.20742	1.03502	1.39109e-06	0.000526582	up	4.75439	4.41238	6.95963	2.22406	2.61272	2.36105	2590	2114	2933	949	1465	1162	GO:0000123;GO:0000723;GO:0046695;GO:0004402;GO:0040010;GO:0006281;GO:0040027;GO:0016301;GO:0000124;GO:0042770;GO:0031929;GO:0070310;GO:0043484;GO:0005737;GO:0005700;GO:0045893;GO:0003713;GO:0033276;GO:0032204;GO:0005794;GO:0016242;GO:0005198;GO:0051726;GO:0006260;GO:0007274;GO:0042981;GO:0060536;GO:0005730;GO:1904262;GO:0004672;GO:0046854;GO:0000122;GO:0045202;GO:0018105;GO:0006303;GO:0042481;GO:…	CC;BP;CC;MF;BP;BP;BP;MF;CC;BP;BP;CC;BP;CC;CC;BP;MF;CC;BP;CC;BP;MF;BP;BP;BP;BP;BP;CC;BP;MF;BP;BP;CC;BP;BP;BP;BP;MF;MF;CC;BP;BP;CC;BP;CC;BP;BP;BP;BP;BP;MF;BP;CC;BP;BP;CC;MF;CC;BP;BP;CC;MF;BP;CC;BP;BP;CC;MF;BP;BP;BP;BP;MF;BP;MF;BP;BP;CC;BP;BP;BP;BP;CC;MF;CC;BP;	histone acetyltransferase complex;telomere maintenance;SLIK (SAGA-like) complex;histone acetyltransferase activity;positive regulation of growth rate;DNA repair;negative regulation of vulval development;kinase activity;SAGA complex;signal transduction in response to DNA damage;TOR signaling;ATR-ATRIP complex;regulation of RNA splicing;cytoplasm;polytene chromosome;positive regulation of DNA-templ…	K08874	-	-	transformation/transcription domain-associated protein isoform X1 [Brassica napus]	PF20206.2	Tra1 HEAT repeat ring region	Transformation/transcription domain-associated protein OS=Danio rerio OX=7955 GN=trrap PE=3 SV=1	3HWAK	T	Belongs to the PI3 PI4-kinase family	-	-	-	-	KOG0889	[TBLD]	Signal transduction mechanisms; Chromatin structure and dynamics; Replication, recombination and repair; Cell cycle control, cell division, chromosome partitioning;	Histone acetyltransferase SAGA, TRRAP/TRA1 component, PI-3 kinase superfamily	-
BnaA01G0301300ZS	BnaA01G0301300ZS	2.09025	-1.59527	1.3945e-06	0.000526582	down	1.53206	1.53068	2.78184	6.65428	6.04488	3.56214	128	112	179	434	517	268	GO:0010193;GO:0005506;GO:0009536;GO:0009507;GO:0048653;GO:0016166;GO:0006952;GO:0051707;GO:0010311;GO:0019395;GO:0080086;GO:0009751;GO:0009535;GO:0048364;GO:0009620;GO:0005886;GO:1901149;GO:0009570;GO:0006633;GO:0005737;GO:1990136;GO:0003729;GO:0010597;GO:0009753;GO:0009534;GO:0046872;GO:0016165;GO:0102299;GO:0009695;GO:0008299;GO:0005829;GO:0009737;GO:0016702;GO:1900366;GO:0031408;GO:0009941;GO:…	BP;MF;CC;CC;BP;MF;BP;BP;BP;BP;BP;BP;CC;BP;BP;CC;MF;CC;BP;CC;MF;MF;BP;BP;CC;MF;MF;MF;BP;BP;CC;BP;MF;BP;BP;CC;BP;BP;BP;BP;BP;BP;BP;	response to ozone;iron ion binding;plastid;chloroplast;anther development;phytoene dehydrogenase activity;defense response;response to other organism;lateral root formation;fatty acid oxidation;stamen filament development;response to salicylic acid;chloroplast thylakoid membrane;root development;response to fungus;plasma membrane;salicylic acid binding;chloroplast stroma;fatty acid biosynthetic p…	K15718	ko00591	Linoleic acid metabolism	linoleate 9S-lipoxygenase 5 isoform X2 [Brassica napus]	PF00305.23	Lipoxygenase	Linoleate 9S-lipoxygenase 5 OS=Arabidopsis thaliana OX=3702 GN=LOX5 PE=1 SV=2	4JGPJ	E	Plant lipoxygenase may be involved in a number of diverse aspects of plant physiology including growth and development, pest resistance, and senescence or responses to wounding	-	-	-	-	-	-	-	-	-
BnaC09G0147000ZS	BnaC09G0147000ZS	2.55716	-3.32641	1.41301e-06	0.000528805	down	1.69869	0.768338	2.85844	10.3546	35.0335	4.51683	44	18	57	208	924	105	GO:0140859;GO:0009699;GO:1901599;GO:0050790;GO:0009411;GO:0009753;GO:0009611;GO:0042802;GO:0042349;GO:0006952;GO:0048046;GO:0042803;GO:0102910;GO:0009607;GO:0009807;GO:0019438;	MF;BP;BP;BP;BP;BP;BP;MF;MF;BP;CC;MF;MF;BP;BP;BP;	pterocarpan synthase activity;phenylpropanoid biosynthetic process;(-)-pinoresinol biosynthetic process;regulation of catalytic activity;response to UV;response to jasmonic acid;response to wounding;identical protein binding;guiding stereospecific synthesis activity;defense response;apoplast;protein homodimerization activity;dirigent protein activity;response to biotic stimulus;lignan biosyntheti…	-	-	-	dirigent protein 5 [Brassica napus]	PF03018.18	Dirigent-like protein	Dirigent protein 5 OS=Arabidopsis thaliana OX=3702 GN=DIR5 PE=2 SV=1	3HXKH	S	Dirigent proteins impart stereoselectivity on the phenoxy radical-coupling reaction, yielding optically active lignans from two molecules of coniferyl alcohol in the biosynthesis of lignans, flavonolignans, and alkaloids and thus plays a central role in plant secondary metabolism	-	-	-	-	-	-	-	-	-
BnaC04G0611600ZS	BnaC04G0611600ZS	3.2287	-1.43083	1.48909e-06	0.000552349	down	3.89605	4.73762	7.52768	12.4949	16.7874	10.801	199	213	297	499	880	497	-	-	-	-	-	-	pollen-specific leucine-rich repeat extensin-like protein 1 [Brassica napus]	-	-	-	3HUPM	S	Vegetative cell wall protein	COG3087	Cell division protein FtsN	D	Cell cycle control, cell division, chromosome partitioning	-	-	-	-	-
MSTRG.56197.2	MSTRG.56197.2	2.67712	1.19836	1.54136e-06	0.00056672	up	7.93807	9.18353	7.96727	3.53768	3.00301	3.61681	653	665	507	228	255	269	GO:0005737;GO:0006511;GO:0005829;GO:0003729;GO:0000325;GO:0019941;GO:0016567;GO:0010224;GO:0031386;GO:0005634;GO:0005886;GO:0031625;GO:0009751;	CC;BP;CC;MF;CC;BP;BP;BP;MF;CC;CC;MF;BP;	cytoplasm;ubiquitin-dependent protein catabolic process;cytosol;mRNA binding;plant-type vacuole;modification-dependent protein catabolic process;protein ubiquitination;response to UV-B;protein tag activity;nucleus;plasma membrane;ubiquitin protein ligase binding;response to salicylic acid;	-	-	-	polyubiquitin-like [Durio zibethinus]	PF00240.27	Ubiquitin family	Polyubiquitin 3 OS=Oryza sativa subsp. japonica OX=39947 GN=UBQ3 PE=2 SV=2	3KW11	O	protein Sb04g004280 source	COG5272	Ubiquitin	O	Posttranslational modification, protein turnover, chaperones	KOG0001	[OR]	Posttranslational modification, protein turnover, chaperones; General function prediction only;	Ubiquitin and ubiquitin-like proteins	-
BnaC03G0398500ZS	BnaC03G0398500ZS	2.12024	-1.91423	1.57399e-06	0.000573683	down	1.46698	2.58471	1.09874	5.4783	7.10605	5.92912	335	519	195	980	1670	1223	GO:0070062;GO:0051701;GO:0055062;GO:0015127;GO:0015164;GO:0032310;GO:0042167;GO:0046943;GO:0033198;GO:0030335;GO:0046686;GO:0009651;GO:0030315;GO:0008514;GO:0015143;GO:0048545;GO:0051597;GO:0140357;GO:0055085;GO:0015718;GO:0046581;GO:0071549;GO:0070633;GO:0140928;GO:0009267;GO:0033700;GO:0016323;GO:0009410;GO:0015711;GO:0098591;GO:1990573;GO:0098838;GO:0005516;GO:0098655;GO:1901505;GO:0002576;GO:…	CC;BP;BP;MF;MF;BP;BP;MF;BP;BP;BP;BP;CC;MF;MF;BP;BP;BP;BP;BP;CC;BP;BP;BP;BP;BP;CC;BP;BP;CC;BP;BP;MF;BP;MF;BP;CC;CC;CC;BP;BP;MF;BP;MF;CC;BP;CC;BP;CC;CC;BP;BP;BP;BP;MF;MF;BP;BP;MF;BP;BP;BP;BP;BP;CC;BP;CC;BP;MF;BP;BP;CC;BP;BP;MF;MF;BP;BP;CC;BP;BP;BP;CC;CC;BP;BP;MF;MF;MF;BP;BP;BP;BP;BP;BP;BP;BP;BP;BP;CC;MF;MF;MF;BP;BP;BP;BP;BP;BP;BP;MF;BP;MF;BP;MF;MF;BP;BP;BP;BP;BP;BP;BP;CC;BP;BP;MF;BP;BP;BP;BP;MF;BP;…	extracellular exosome;biological process involved in interaction with host;phosphate ion homeostasis;bilirubin transmembrane transporter activity;glucuronoside transmembrane transporter activity;prostaglandin secretion;heme catabolic process;carboxylic acid transmembrane transporter activity;response to ATP;positive regulation of cell migration;response to cadmium ion;response to salt stress;T-tu…	-	-	-	ABC transporter C family member 3 [Brassica napus]	PF00664.27	ABC transporter transmembrane region	ABC transporter C family member 3 OS=Arabidopsis thaliana OX=3702 GN=ABCC3 PE=1 SV=1	3HR4C	Q	ATPase activity, coupled to transmembrane movement of substances	COG1132	ABC-type multidrug transport system, ATPase and permease component	V	Defense mechanisms	KOG0054	[Q]	Secondary metabolites biosynthesis, transport and catabolism;	Multidrug resistance-associated protein/mitoxantrone resistance protein, ABC superfamily	-
BnaA06G0087400ZS	BnaA06G0087400ZS	1.56632	2.75342	1.59034e-06	0.000574646	up	3.77643	3.93378	6.61142	0.244611	1.26734	0.332758	103	94	139	6	36	9	GO:0005634;GO:0009738;GO:0006952;GO:0009637;GO:0045735;GO:0019760;GO:0080149;GO:0000976;GO:0003677;GO:0042803;GO:0006355;GO:0005737;GO:0017148;GO:0045893;GO:0009267;GO:0046982;GO:0042802;GO:2000693;GO:0003700;GO:0043565;GO:0009845;GO:0006971;GO:0009744;	CC;BP;BP;BP;MF;BP;BP;MF;MF;MF;BP;CC;BP;BP;BP;MF;MF;BP;MF;MF;BP;BP;BP;	nucleus;abscisic acid-activated signaling pathway;defense response;response to blue light;nutrient reservoir activity;glucosinolate metabolic process;sucrose induced translational repression;transcription cis-regulatory region binding;DNA binding;protein homodimerization activity;regulation of DNA-templated transcription;cytoplasm;negative regulation of translation;positive regulation of DNA-temp…	-	-	-	basic leucine zipper 43 [Brassica rapa]	PF00170.25	bZIP transcription factor	Basic leucine zipper 43 OS=Arabidopsis thaliana OX=3702 GN=BZIP43 PE=1 SV=1	3I028	K	arabidopsis thaliana basic leucine-zipper	-	-	-	-	-	-	-	-	bZIP
BnaC07G0259200ZS	BnaC07G0259200ZS	5.58544	0.876814	1.70585e-06	0.000611117	nonsig	68.1417	55.6291	76.3008	33.7633	38.393	28.5667	2403	1725	2082	933	1394	910	GO:0032715;GO:0070062;GO:0055037;GO:0051592;GO:0140157;GO:0030424;GO:0015843;GO:0030157;GO:0043066;GO:0022857;GO:0070301;GO:0005212;GO:0003094;GO:0016477;GO:0009651;GO:0034644;GO:0030315;GO:0071456;GO:0005769;GO:0042631;GO:0070295;GO:0000326;GO:0007154;GO:0055085;GO:0051290;GO:0071549;GO:0042807;GO:0015793;GO:0005737;GO:1990349;GO:0072205;GO:0003729;GO:0016323;GO:0035379;GO:0032691;GO:0005901;GO:…	BP;CC;CC;BP;BP;CC;BP;BP;BP;MF;BP;MF;BP;BP;BP;BP;CC;BP;CC;BP;BP;CC;BP;BP;BP;BP;CC;BP;CC;BP;BP;MF;CC;MF;BP;CC;MF;MF;BP;BP;BP;BP;BP;BP;BP;CC;BP;BP;CC;CC;MF;BP;CC;MF;CC;BP;MF;BP;BP;CC;CC;CC;CC;BP;CC;BP;CC;BP;CC;BP;BP;CC;BP;CC;BP;CC;CC;MF;CC;BP;BP;CC;BP;MF;CC;BP;BP;BP;BP;BP;BP;BP;MF;CC;BP;BP;BP;MF;BP;CC;BP;CC;CC;MF;BP;BP;CC;BP;BP;BP;BP;MF;MF;CC;BP;BP;MF;BP;MF;CC;BP;CC;CC;BP;BP;BP;BP;BP;CC;CC;BP;BP;BP;…	negative regulation of interleukin-6 production;extracellular exosome;recycling endosome;response to calcium ion;ammonium import across plasma membrane;axon;methylammonium transport;pancreatic juice secretion;negative regulation of apoptotic process;transmembrane transporter activity;cellular response to hydrogen peroxide;structural constituent of eye lens;glomerular filtration;cell migration;res…	K09873	-	-	aquaporin TIP2-3 [Brassica napus]	PF00230.24	Major intrinsic protein	Aquaporin TIP2-3 OS=Arabidopsis thaliana OX=3702 GN=TIP2-3 PE=1 SV=1	3HR0F	G	Belongs to the MIP aquaporin (TC 1.A.8) family	COG0580	Glycerol uptake facilitator or related aquaporin (Major Intrinsic protein Family)	G	Carbohydrate transport and metabolism	KOG0223	[G]	Carbohydrate transport and metabolism;	Aquaporin (major intrinsic protein family)	-
BnaC02G0345000ZS	BnaC02G0345000ZS	6.95706	-1.02958	1.855e-06	0.000658919	down	81.3121	86.971	102.828	156.068	161.565	190.631	2435	2290	2383	3660	4979	5155	GO:0070062;GO:0019904;GO:0005507;GO:0005634;GO:0009507;GO:0009536;GO:0000325;GO:0006952;GO:0048046;GO:0005739;GO:0009409;GO:0018900;GO:0014070;GO:0046686;GO:1900384;GO:0006979;GO:0071456;GO:0009751;GO:1902000;GO:0004601;GO:0033197;GO:0010043;GO:0016034;GO:0018833;GO:0009407;GO:2001147;GO:0050897;GO:0005886;GO:0009705;GO:1901149;GO:0042803;GO:0009072;GO:0009570;GO:0009734;GO:0005737;GO:0004364;GO:…	CC;MF;MF;CC;CC;CC;CC;BP;CC;CC;BP;BP;BP;BP;BP;BP;BP;BP;BP;MF;BP;BP;MF;MF;BP;MF;MF;CC;CC;MF;MF;BP;CC;BP;CC;MF;BP;CC;CC;BP;BP;MF;BP;MF;BP;BP;MF;BP;BP;CC;CC;BP;MF;BP;CC;MF;CC;CC;CC;CC;CC;MF;MF;MF;MF;BP;CC;MF;CC;BP;	extracellular exosome;protein domain specific binding;copper ion binding;nucleus;chloroplast;plastid;plant-type vacuole;defense response;apoplast;mitochondrion;response to cold;dichloromethane metabolic process;response to organic cyclic compound;response to cadmium ion;regulation of flavonol biosynthetic process;response to oxidative stress;cellular response to hypoxia;response to salicylic acid…	K00799	ko01100;ko00480	Metabolic pathways;Glutathione metabolism	glutathione S-transferase F3-like [Brassica napus]	PF02798.24	Glutathione S-transferase, N-terminal domain	Glutathione S-transferase F3 OS=Arabidopsis thaliana OX=3702 GN=GSTF3 PE=2 SV=1	3HVUV	O	Belongs to the GST superfamily	COG0625	Glutathione S-transferase	O	Posttranslational modification, protein turnover, chaperones	KOG0867	[O]	Posttranslational modification, protein turnover, chaperones;	Glutathione S-transferase	-
BnaA09G0177600ZS	BnaA09G0177600ZS	0.472158	2.1224	2.00446e-06	0.000701009	up	0.642588	0.586031	0.848731	0.111919	0.165346	0.141721	53	43	54	8	14	11	GO:0016020;GO:0007005;GO:0046608;GO:0005640;GO:0000166;GO:0031965;GO:0042572;GO:0031969;GO:0016166;GO:0016117;GO:0016120;GO:0009662;GO:0005759;GO:0016627;GO:0005789;GO:0016491;GO:0051786;	CC;BP;MF;CC;MF;CC;BP;CC;MF;BP;BP;BP;CC;MF;CC;MF;MF;	membrane;mitochondrion organization;carotenoid isomerase activity;nuclear outer membrane;nucleotide binding;nuclear membrane;retinol metabolic process;chloroplast membrane;phytoene dehydrogenase activity;carotenoid biosynthetic process;carotene biosynthetic process;etioplast organization;mitochondrial matrix;oxidoreductase activity, acting on the CH-CH group of donors;endoplasmic reticulum membra…	-	-	-	prolycopene isomerase, chloroplastic isoform X1 [Brassica napus]	PF01593.28	Flavin containing amine oxidoreductase	Prolycopene isomerase, chloroplastic OS=Daucus carota OX=4039 GN=CRTISO PE=2 SV=1	3HNYA	H	Flavin containing amine oxidoreductase	COG1233	Phytoene dehydrogenase-related protein	Q	Secondary metabolites biosynthesis, transport and catabolism	KOG4254	[H]	Coenzyme transport and metabolism;	Phytoene desaturase	-
BnaA01G0331700ZS	BnaA01G0331700ZS	2.60784	-1.29576	2.00694e-06	0.000701009	down	3.28475	3.73711	2.96315	7.1147	9.38809	6.56713	154	154	108	261	452	278	GO:0030643;GO:0010936;GO:0009612;GO:0070258;GO:0000325;GO:0006826;GO:0160055;GO:0050728;GO:0050830;GO:0032695;GO:0008198;GO:0030335;GO:0034224;GO:0014070;GO:0006809;GO:0007162;GO:0042784;GO:0008199;GO:0032929;GO:0032720;GO:0010043;GO:0009986;GO:0032496;GO:0030316;GO:0140825;GO:0005789;GO:0005886;GO:0034097;GO:0042542;GO:0036005;GO:0001503;GO:0016787;GO:0032691;GO:0045019;GO:0046872;GO:0016791;GO:…	BP;BP;BP;CC;CC;BP;CC;BP;BP;BP;MF;BP;BP;BP;BP;BP;BP;MF;BP;BP;BP;CC;BP;BP;MF;CC;CC;BP;BP;BP;BP;MF;BP;BP;MF;MF;BP;BP;BP;BP;CC;BP;CC;MF;CC;CC;CC;BP;CC;BP;BP;MF;BP;	intracellular phosphate ion homeostasis;negative regulation of macrophage cytokine production;response to mechanical stimulus;inner membrane pellicle complex;plant-type vacuole;iron ion transport;glideosome;negative regulation of inflammatory response;defense response to Gram-positive bacterium;negative regulation of interleukin-12 production;ferrous iron binding;positive regulation of cell migra…	K14379	ko00740;ko01100	Riboflavin metabolism;Metabolic pathways	purple acid phosphatase 17 [Brassica rapa]	PF00149.32	Calcineurin-like phosphoesterase	Purple acid phosphatase 17 OS=Arabidopsis thaliana OX=3702 GN=PAP17 PE=2 SV=1	3HNC4	O	Purple acid phosphatase	COG0420	DNA repair exonuclease SbcCD nuclease subunit	L	Replication, recombination and repair	KOG2679	[O]	Posttranslational modification, protein turnover, chaperones;	Purple (tartrate-resistant) acid phosphatase	-
BnaC08G0404600ZS	BnaC08G0404600ZS	1.50514	-2.39182	2.15185e-06	0.00074541	down	1.00275	0.67061	0.688766	3.81267	6.5355	1.55256	74	44	39	219	493	103	GO:0016052;GO:0005975;GO:0048046;GO:0031982;GO:0009831;GO:0016798;GO:0010047;GO:0009846;GO:0047911;GO:0005737;GO:0009830;GO:0048235;GO:0009835;GO:0071555;GO:0005576;GO:0004650;GO:0016020;GO:0009501;GO:0045490;GO:0048868;GO:0005794;GO:0009505;GO:0010227;GO:0005783;GO:0009901;GO:0019863;GO:0009555;GO:0043667;	BP;BP;CC;CC;BP;MF;BP;BP;MF;CC;BP;BP;BP;BP;CC;MF;CC;CC;BP;BP;CC;CC;BP;CC;BP;MF;BP;CC;	carbohydrate catabolic process;carbohydrate metabolic process;apoplast;vesicle;plant-type cell wall modification involved in multidimensional cell growth;hydrolase activity, acting on glycosyl bonds;fruit dehiscence;pollen germination;galacturan 1,4-alpha-galacturonidase activity;cytoplasm;cell wall modification involved in abscission;pollen sperm cell differentiation;fruit ripening;cell wall org…	-	-	-	probable polygalacturonase isoform X1 [Brassica napus]	PF00295.21	Glycosyl hydrolases family 28	Probable polygalacturonase OS=Vitis vinifera OX=29760 GN=GSVIVT00026920001 PE=1 SV=1	3HZTC	G	Belongs to the glycosyl hydrolase 28 family	COG5434	Polygalacturonase	G	Carbohydrate transport and metabolism	-	-	-	-	-
BnaC01G0228400ZS	BnaC01G0228400ZS	0.982091	-2.63704	2.1785e-06	0.000748459	down	0.131915	0.258612	0.642754	2.30946	2.09449	1.47862	5	8	18	64	76	47	GO:0070062;GO:0032715;GO:0055037;GO:0051592;GO:0140157;GO:0030424;GO:0015843;GO:0030157;GO:0043066;GO:0022857;GO:0070301;GO:0005212;GO:0003094;GO:0016477;GO:0009651;GO:0034644;GO:0030315;GO:0071456;GO:0005769;GO:0042631;GO:0070295;GO:0000326;GO:0007154;GO:0055085;GO:0051290;GO:0071549;GO:0042807;GO:0015793;GO:0005737;GO:1990349;GO:0072205;GO:0003729;GO:0016323;GO:0035379;GO:0009506;GO:0032691;GO:…	CC;BP;CC;BP;BP;CC;BP;BP;BP;MF;BP;MF;BP;BP;BP;BP;CC;BP;CC;BP;BP;CC;BP;BP;BP;BP;CC;BP;CC;BP;BP;MF;CC;MF;CC;BP;CC;MF;MF;BP;BP;BP;BP;BP;BP;BP;CC;BP;BP;CC;CC;MF;BP;CC;MF;CC;BP;MF;BP;BP;CC;CC;CC;CC;BP;BP;CC;CC;BP;CC;BP;BP;CC;BP;CC;BP;CC;CC;MF;CC;BP;BP;CC;BP;MF;CC;BP;BP;BP;BP;BP;BP;BP;MF;CC;BP;BP;BP;MF;BP;CC;BP;CC;CC;MF;BP;BP;CC;BP;BP;BP;BP;MF;MF;CC;BP;BP;MF;BP;MF;CC;BP;CC;CC;BP;BP;BP;BP;BP;CC;CC;BP;BP;…	extracellular exosome;negative regulation of interleukin-6 production;recycling endosome;response to calcium ion;ammonium import across plasma membrane;axon;methylammonium transport;pancreatic juice secretion;negative regulation of apoptotic process;transmembrane transporter activity;cellular response to hydrogen peroxide;structural constituent of eye lens;glomerular filtration;cell migration;res…	K09873	-	-	probable aquaporin TIP2-2 [Brassica napus]	PF00230.24	Major intrinsic protein	Probable aquaporin TIP2-2 OS=Arabidopsis thaliana OX=3702 GN=TIP2-2 PE=1 SV=2	3HR0F	G	Belongs to the MIP aquaporin (TC 1.A.8) family	COG0580	Glycerol uptake facilitator or related aquaporin (Major Intrinsic protein Family)	G	Carbohydrate transport and metabolism	KOG0223	[G]	Carbohydrate transport and metabolism;	Aquaporin (major intrinsic protein family)	-
BnaC07G0297800ZS	BnaC07G0297800ZS	1.98102	1.20393	2.22285e-06	0.000757487	up	3.97132	4.46958	5.24974	1.86715	2.10888	1.49884	195	193	199	72	107	67	-	-	-	-	-	-	uncharacterized protein LOC106410107 [Brassica napus]	PF07719.21	Tetratricopeptide repeat	-	3HMK9	-	-	COG5777	Uncharacterized cyanobacterial/plant membrane protein Pro0498, contains N-terminal TPR repeats	C	Energy production and conversion	-	-	-	-	-
BnaA05G0048700ZS	BnaA05G0048700ZS	2.25638	-1.75506	2.25199e-06	0.000761226	down	1.38262	2.13036	2.85051	6.02802	5.43507	8.15964	46	62	72	154	183	241	GO:0009723;GO:0009415;GO:0009880;GO:0006952;GO:0071369;GO:0048825;GO:0009651;GO:0071456;GO:0001666;GO:1900036;GO:0009739;GO:0000976;GO:0009620;GO:0034605;GO:0005737;GO:0009864;GO:0045893;GO:0009753;GO:0009835;GO:0031347;GO:0010143;GO:0010166;GO:0008219;GO:0048510;GO:1904277;GO:0010104;GO:0009408;GO:0009617;GO:0051726;GO:0010030;GO:0009788;GO:0009735;GO:0009409;GO:0045595;GO:0009877;GO:0050832;GO:…	BP;BP;BP;BP;BP;BP;BP;BP;BP;BP;BP;MF;BP;BP;CC;BP;BP;BP;BP;BP;BP;BP;BP;BP;BP;BP;BP;BP;BP;BP;BP;BP;BP;BP;BP;BP;MF;BP;BP;BP;MF;MF;BP;BP;BP;BP;BP;BP;BP;BP;CC;BP;BP;BP;BP;BP;BP;BP;BP;BP;BP;BP;BP;BP;BP;BP;BP;BP;BP;BP;CC;BP;BP;BP;BP;BP;BP;BP;BP;BP;BP;BP;BP;MF;CC;BP;BP;BP;BP;BP;BP;BP;MF;BP;BP;BP;CC;BP;BP;BP;BP;BP;BP;BP;BP;	response to ethylene;response to water;embryonic pattern specification;defense response;cellular response to ethylene stimulus;cotyledon development;response to salt stress;cellular response to hypoxia;response to hypoxia;positive regulation of cellular response to heat;response to gibberellin;transcription cis-regulatory region binding;response to fungus;cellular response to heat;cytoplasm;induc…	K09286	-	-	ethylene-responsive transcription factor 13-like [Brassica napus]	PF00847.24	AP2 domain	Ethylene-responsive transcription factor 13 OS=Arabidopsis thaliana OX=3702 GN=ERF13 PE=1 SV=2	3HYBD	K	Transcription factor	-	-	-	-	-	-	-	-	AP2/ERF-ERF
BnaC01G0484300ZS	BnaC01G0484300ZS	3.32506	0.908407	2.31144e-06	0.000775071	nonsig	13.0777	11.7933	13.547	5.66777	6.91895	6.32361	1051	833	842	357	572	459	GO:0000977;GO:0046695;GO:0019827;GO:0006281;GO:0003678;GO:0048557;GO:0003697;GO:0000124;GO:0099115;GO:0045089;GO:0030957;GO:0006275;GO:0040026;GO:0016589;GO:0045893;GO:0005700;GO:0050681;GO:1990830;GO:0034243;GO:0002230;GO:0050829;GO:0005615;GO:0140288;GO:0046651;GO:0001701;GO:0090090;GO:0072553;GO:0060041;GO:0042393;GO:0060347;GO:0034451;GO:0003222;GO:1902459;GO:0160004;GO:0106222;GO:2000022;GO:…	MF;CC;BP;BP;MF;BP;MF;CC;CC;BP;MF;BP;BP;CC;BP;CC;MF;BP;BP;BP;BP;CC;CC;BP;BP;BP;BP;BP;MF;BP;CC;BP;BP;MF;MF;BP;BP;BP;BP;BP;BP;BP;CC;BP;BP;BP;BP;CC;BP;CC;BP;MF;BP;BP;BP;BP;CC;BP;CC;MF;BP;BP;BP;BP;BP;CC;BP;BP;BP;BP;BP;CC;BP;MF;MF;MF;CC;BP;CC;BP;CC;BP;BP;BP;MF;CC;BP;MF;BP;CC;BP;BP;MF;BP;BP;BP;BP;MF;BP;BP;BP;CC;BP;BP;BP;CC;CC;MF;BP;BP;BP;BP;BP;BP;BP;CC;CC;BP;BP;CC;BP;BP;BP;BP;CC;MF;CC;BP;BP;BP;BP;BP;BP;…	RNA polymerase II transcription regulatory region sequence-specific DNA binding;SLIK (SAGA-like) complex;stem cell population maintenance;DNA repair;DNA helicase activity;embryonic digestive tract morphogenesis;single-stranded DNA binding;SAGA complex;chromosome, subtelomeric region;positive regulation of innate immune response;Tat protein binding;regulation of DNA replication;positive regulation…	-	-	-	probable ATP-dependent DNA helicase CHR12 [Brassica rapa]	PF00176.27	SNF2-related domain	Probable ATP-dependent DNA helicase CHR12 OS=Arabidopsis thaliana OX=3702 GN=CHR12 PE=2 SV=1	3HQ03	BK	ATP-dependent DNA helicase	COG0553	Superfamily II DNA or RNA helicase, SNF2 family	KL	-	KOG0386	[BK]	Chromatin structure and dynamics; Transcription;	Chromatin remodeling complex SWI/SNF, component SWI2 and related ATPases (DNA/RNA helicase superfamily)	-
BnaC04G0407900ZS	BnaC04G0407900ZS	5.20565	-1.61526	2.48056e-06	0.00082518	down	16.6913	29.762	17.995	63.3084	54.0826	67.9671	1035	1623	864	3074	3450	3805	GO:0015802;GO:0015810;GO:0070778;GO:0015185;GO:0009536;GO:0015399;GO:0006952;GO:0000325;GO:0015183;GO:0009624;GO:0015824;GO:0005774;GO:0015194;GO:0015293;GO:0015186;GO:0015172;GO:0015173;GO:0015827;GO:0015808;GO:0006865;GO:0110126;GO:0015193;GO:0005886;GO:0015804;GO:0005789;GO:0015174;GO:0015800;GO:0005313;GO:0003333;GO:0016020;GO:0015180;GO:0098712;GO:0031965;GO:0015175;GO:0043090;GO:0015812;GO:…	BP;BP;BP;MF;CC;MF;BP;CC;MF;BP;BP;CC;MF;MF;MF;MF;MF;BP;BP;BP;BP;MF;CC;BP;CC;MF;BP;MF;BP;CC;MF;BP;CC;MF;BP;BP;MF;	basic amino acid transport;aspartate transmembrane transport;L-aspartate transmembrane transport;gamma-aminobutyric acid transmembrane transporter activity;plastid;primary active transmembrane transporter activity;defense response;plant-type vacuole;L-aspartate transmembrane transporter activity;response to nematode;proline transport;vacuolar membrane;L-serine transmembrane transporter activity;s…	-	-	-	lysine histidine transporter 1 [Brassica napus]	PF01490.22	Transmembrane amino acid transporter protein	Lysine histidine transporter 1 OS=Arabidopsis thaliana OX=3702 GN=LHT1 PE=1 SV=1	3HTD1	E	Transporter	-	-	-	-	KOG1303	[E]	Amino acid transport and metabolism;	Amino acid transporters	-
MSTRG.5752.2	MSTRG.5752.2	0.485086	-2.43431	2.79723e-06	0.000923197	down	0.109412	0.19261	0.105063	0.67288	0.677379	0.832641	8	12	6	36	47	51	GO:0006310;GO:0035861;GO:0032508;GO:0003723;GO:0051974;GO:1990814;GO:0000287;GO:0033678;GO:0000723;GO:0031297;GO:0003677;GO:0043601;GO:0003697;GO:0006260;GO:0071932;GO:0016887;GO:0000785;GO:0033553;GO:1903469;GO:0044806;GO:0032211;GO:1902983;GO:0051880;GO:0005730;GO:0005657;GO:0032204;GO:0005524;GO:0000262;GO:0043596;GO:0017116;GO:1990426;GO:0043139;GO:0000781;GO:0003678;GO:0070336;GO:0043504;GO:…	BP;CC;BP;MF;BP;MF;MF;MF;BP;BP;MF;CC;MF;BP;BP;MF;CC;CC;BP;BP;BP;BP;MF;CC;CC;BP;MF;CC;CC;MF;BP;MF;CC;MF;MF;BP;CC;BP;BP;CC;CC;MF;BP;MF;CC;MF;	DNA recombination;site of double-strand break;DNA duplex unwinding;RNA binding;obsolete negative regulation of telomerase activity;DNA/DNA annealing activity;magnesium ion binding;5'-3' DNA/RNA helicase activity;telomere maintenance;replication fork processing;DNA binding;nuclear replisome;single-stranded DNA binding;DNA replication;replication fork reversal;ATP hydrolysis activity;chromatin;rDNA…	-	-	-	ATP-dependent DNA helicase PIF1-like [Brassica napus]	PF21530.1	DNA helicase Pif1, 2B domain	ATP-dependent DNA helicase pfh1 OS=Schizosaccharomyces pombe (strain 972 / ATCC 24843) OX=284812 GN=pfh1 PE=1 SV=1	3HWI1	D	ATP-dependent DNA helicase	COG0507	ATPase helicase helicase subunit RecD of the DNA repair enzyme RecBCD (exonuclease V)	L	Replication, recombination and repair	KOG0987	[D]	Cell cycle control, cell division, chromosome partitioning;	DNA helicase PIF1/RRM3	-
BnaA07G0168600ZS	BnaA07G0168600ZS	3.00639	1.18415	2.82265e-06	0.000924308	up	13.1821	9.7261	9.85869	4.46851	4.64025	4.28381	534	346	309	142	194	157	GO:0031676;	CC;	plasma membrane-derived thylakoid membrane;	-	-	-	thylakoid membrane protein slr0575-like [Brassica napus]	PF11016.12	Protein of unknown function (DUF2854)	Thylakoid membrane protein slr0575 OS=Synechocystis sp. (strain PCC 6803 / Kazusa) OX=1111708 GN=slr0575 PE=4 SV=1	3HYEV	S	Protein of unknown function (DUF2854)	COG5780	Acclimation of photosynthesis to environment protein APE1, affects chlorophyll fluorescence, DUF2854 (PF11016) domain	CT	-	-	-	-	-	-
BnaC08G0428600ZS	BnaC08G0428600ZS	1.4332	1.57986	2.91609e-06	0.000947503	up	2.40541	2.78507	3.53851	0.835404	0.965462	0.837661	82	83	93	23	34	26	GO:0070062;GO:0014902;GO:0110076;GO:0001659;GO:0005759;GO:0012505;GO:0008379;GO:0042631;GO:0009535;GO:0047066;GO:0033194;GO:0005737;GO:0006641;GO:0051450;GO:0009410;GO:0051258;GO:0080183;GO:0008430;GO:0005777;GO:0017124;GO:0071333;GO:0051593;GO:0005615;GO:0008631;GO:0005794;GO:0009941;GO:0010332;GO:1902905;GO:0032355;GO:0004602;GO:0033599;GO:0005741;GO:0032991;GO:0001885;GO:0009793;GO:0010269;GO:…	CC;BP;BP;BP;CC;CC;MF;BP;CC;MF;BP;CC;BP;BP;BP;BP;BP;MF;CC;MF;BP;BP;CC;BP;CC;CC;BP;BP;BP;MF;BP;CC;CC;BP;BP;BP;BP;CC;BP;CC;CC;BP;BP;CC;BP;BP;BP;BP;BP;CC;BP;MF;BP;BP;BP;CC;BP;BP;BP;CC;BP;MF;BP;BP;BP;CC;BP;BP;CC;BP;CC;BP;BP;BP;BP;MF;BP;BP;BP;BP;BP;BP;BP;BP;BP;BP;BP;CC;BP;CC;BP;BP;MF;BP;BP;CC;CC;BP;BP;BP;BP;BP;BP;CC;CC;MF;BP;BP;BP;MF;BP;BP;CC;BP;CC;BP;BP;CC;CC;BP;	extracellular exosome;myotube differentiation;negative regulation of ferroptosis;temperature homeostasis;mitochondrial matrix;endomembrane system;thioredoxin peroxidase activity;cellular response to water deprivation;chloroplast thylakoid membrane;phospholipid-hydroperoxide glutathione peroxidase activity;response to hydroperoxide;cytoplasm;triglyceride metabolic process;myoblast proliferation;re…	K00432	ko00480;ko01100;ko00590	Glutathione metabolism;Metabolic pathways;Arachidonic acid metabolism	PREDICTED: phospholipid hydroperoxide glutathione peroxidase 1, chloroplastic [Brassica oleracea var. oleracea]	PF00255.23	Glutathione peroxidase	Phospholipid hydroperoxide glutathione peroxidase 1, chloroplastic OS=Arabidopsis thaliana OX=3702 GN=GPX1 PE=2 SV=2	3HNEN	O	Glutathione peroxidase	COG0386	Thioredoxin/glutathione peroxidase BtuE, reduces lipid peroxides	VI	-	KOG1651	[O]	Posttranslational modification, protein turnover, chaperones;	Glutathione peroxidase	-
BnaC08G0205000ZS	BnaC08G0205000ZS	3.04631	-1.86214	2.99237e-06	0.00096481	down	3.55575	5.49352	2.76888	16.548	9.42528	14.5816	383	520	231	1395	1044	1417	GO:0016757;GO:0000139;GO:0009664;GO:0030244;	MF;CC;BP;BP;	glycosyltransferase activity;Golgi membrane;plant-type cell wall organization;cellulose biosynthetic process;	-	-	-	PREDICTED: uncharacterized protein LOC106344306 [Brassica oleracea var. oleracea]	PF02485.25	Core-2/I-Branching enzyme	Glycosyltransferase BC10 OS=Oryza sativa subsp. japonica OX=39947 GN=BC10 PE=1 SV=1	3GMCS	-	-	-	-	-	-	-	-	-	-	-
BnaC04G0555500ZS	BnaC04G0555500ZS	2.0856	-1.77069	3.20175e-06	0.00102444	down	1.00331	2.28748	2.07905	5.37494	5.07729	6.44315	70	140	112	293	364	405	GO:0032715;GO:0030027;GO:0030424;GO:0098793;GO:0002376;GO:0007032;GO:0052744;GO:0030317;GO:0090315;GO:0007165;GO:0009637;GO:0010801;GO:0014015;GO:0009651;GO:0046488;GO:0005769;GO:1990649;GO:0043058;GO:0006897;GO:0032880;GO:1990640;GO:0030479;GO:0009743;GO:0007010;GO:0040011;GO:0001750;GO:0005737;GO:2000369;GO:0045893;GO:0009410;GO:0097730;GO:0008340;GO:0042169;GO:0035810;GO:0009753;GO:0032870;GO:…	BP;CC;CC;CC;BP;BP;MF;BP;BP;BP;BP;BP;BP;BP;BP;CC;MF;BP;BP;BP;MF;CC;BP;BP;BP;CC;CC;BP;BP;BP;CC;BP;MF;BP;BP;BP;BP;BP;BP;BP;BP;CC;CC;BP;MF;BP;MF;BP;BP;MF;CC;CC;BP;CC;BP;BP;BP;BP;MF;CC;BP;BP;CC;CC;CC;BP;BP;BP;BP;BP;BP;BP;CC;MF;CC;MF;MF;BP;BP;BP;BP;BP;BP;MF;BP;MF;CC;CC;BP;BP;BP;CC;CC;CC;BP;BP;MF;MF;CC;BP;CC;BP;BP;BP;MF;BP;BP;CC;BP;CC;CC;BP;CC;BP;BP;BP;CC;MF;CC;BP;CC;MF;BP;BP;BP;BP;BP;BP;CC;BP;MF;BP;CC;…	negative regulation of interleukin-6 production;lamellipodium;axon;presynapse;immune system process;endosome organization;phosphatidylinositol monophosphate phosphatase activity;flagellated sperm motility;negative regulation of protein targeting to membrane;signal transduction;response to blue light;negative regulation of peptidyl-threonine phosphorylation;positive regulation of gliogenesis;respo…	-	-	-	type I inositol polyphosphate 5-phosphatase 8 [Brassica napus]	PF03372.27	Endonuclease/Exonuclease/phosphatase family	Type I inositol polyphosphate 5-phosphatase 8 OS=Arabidopsis thaliana OX=3702 GN=IP5P8 PE=2 SV=1	3HNY3	U	Type I inositol 1,4,5-trisphosphate 5-phosphatase CVP2-like	-	-	-	-	KOG0565	[U]	Intracellular trafficking, secretion, and vesicular transport;	Inositol polyphosphate 5-phosphatase and related proteins	-
BnaC05G0008900ZS	BnaC05G0008900ZS	1.07599	-2.00597	3.2789e-06	0.00104118	down	0.717707	0.420924	0.43081	2.73426	1.29921	1.92789	55	28	26	162	102	132	GO:0042343;GO:0009805;GO:0010584;GO:0006952;GO:0016099;GO:0106144;GO:0047082;GO:0071456;GO:0009684;GO:0016705;GO:0010333;GO:0009753;GO:0009835;GO:0009699;GO:0106240;GO:0051791;GO:0006587;GO:0009641;GO:0051762;GO:0080027;GO:0051502;GO:0047084;GO:0010154;GO:0072547;GO:0102811;GO:0106223;GO:0016114;GO:0102171;GO:0010208;GO:0008284;GO:0051792;GO:0047957;GO:0050832;GO:0009733;GO:0048437;GO:0046409;GO:…	BP;BP;BP;BP;BP;MF;MF;BP;BP;MF;MF;BP;BP;BP;MF;BP;BP;BP;BP;BP;BP;MF;BP;MF;MF;MF;BP;MF;BP;BP;BP;MF;BP;BP;BP;MF;BP;BP;MF;MF;BP;MF;BP;BP;BP;BP;MF;BP;MF;MF;MF;BP;BP;CC;BP;BP;MF;CC;BP;CC;BP;CC;MF;BP;MF;MF;CC;MF;MF;BP;MF;MF;BP;BP;MF;BP;MF;BP;BP;MF;BP;MF;MF;BP;CC;BP;BP;BP;MF;BP;BP;BP;BP;BP;CC;CC;BP;BP;BP;BP;BP;MF;BP;MF;	indole glucosinolate metabolic process;coumarin biosynthetic process;pollen exine formation;defense response;monoterpenoid biosynthetic process;fraxetin 5-hydroxylase activity;3,9-dihydroxypterocarpan 6a-monooxygenase activity;cellular response to hypoxia;indoleacetic acid biosynthetic process;oxidoreductase activity, acting on paired donors, with incorporation or reduction of molecular oxygen;te…	K20619	-	-	cytochrome P450 78A6 [Brassica napus]	PF00067.26	Cytochrome P450	Cytochrome P450 78A6 OS=Arabidopsis thaliana OX=3702 GN=CYP78A6 PE=2 SV=1	3HWZ2	Q	Belongs to the cytochrome P450 family	COG2124	Cytochrome P450	QV	-	KOG0156	[Q]	Secondary metabolites biosynthesis, transport and catabolism;	Cytochrome P450 CYP2 subfamily	-
BnaC04G0346500ZS	BnaC04G0346500ZS	0.880554	-1.69421	3.38464e-06	0.00106445	down	0.40782	0.373988	0.560549	1.74817	1.29481	1.0457	28	23	30	93	91	64	GO:0030288;GO:0000325;GO:0099503;GO:0005576;	CC;CC;CC;CC;	outer membrane-bounded periplasmic space;plant-type vacuole;secretory vesicle;extracellular region;	-	-	-	fasciclin-like arabinogalactan protein 15 [Brassica napus]	PF02469.26	Fasciclin domain	Fasciclin-like arabinogalactan protein 15 OS=Arabidopsis thaliana OX=3702 GN=FLA15 PE=2 SV=1	3HW0D	MW	fasciclin-like arabinogalactan protein	COG2335	Uncaracterized surface protein containing fasciclin (FAS1) repeats	R	General function prediction only	KOG1437	[MW]	Cell wall/membrane/envelope biogenesis; Extracellular structures;	Fasciclin and related adhesion glycoproteins	-
BnaC06G0368100ZS	BnaC06G0368100ZS	1.62806	-1.61691	3.40298e-06	0.00106445	down	1.1208	1.30261	1.18249	4.40146	2.32524	3.55578	81	83	66	249	173	232	GO:1990538;GO:0050826;GO:0009867;GO:0009507;GO:0000139;GO:0006952;GO:0009409;GO:0030244;GO:0016413;GO:0005802;GO:0045492;GO:0009620;GO:0005886;GO:1990937;GO:0000138;GO:0010150;GO:0045893;GO:0045489;GO:0043565;GO:0010411;GO:0016020;GO:0009834;GO:0009827;GO:0005794;GO:0005783;GO:0005773;GO:0016740;GO:0007623;GO:0009506;GO:0005797;GO:0005768;	MF;BP;BP;CC;CC;BP;BP;BP;MF;CC;BP;BP;CC;BP;CC;BP;BP;BP;MF;BP;CC;BP;BP;CC;CC;CC;MF;BP;CC;CC;CC;	xylan O-acetyltransferase activity;response to freezing;jasmonic acid mediated signaling pathway;chloroplast;Golgi membrane;defense response;response to cold;cellulose biosynthetic process;O-acetyltransferase activity;trans-Golgi network;xylan biosynthetic process;response to fungus;plasma membrane;xylan acetylation;Golgi trans cisterna;leaf senescence;positive regulation of DNA-templated transcr…	K23877	-	-	xyloglucan O-acetyltransferase 1-like [Brassica napus]	PF13839.10	GDSL/SGNH-like Acyl-Esterase family found in Pmr5 and Cas1p	Xyloglucan O-acetyltransferase 1 OS=Arabidopsis thaliana OX=3702 GN=AXY4 PE=1 SV=1	3HN7W	S	GDSL/SGNH-like Acyl-Esterase family found in Pmr5 and Cas1p	-	-	-	-	-	-	-	-	-
BnaC04G0104100ZS	BnaC04G0104100ZS	3.68066	-1.99305	3.45774e-06	0.00107356	down	7.36267	3.29181	8.86407	22.0294	35.7737	13.8274	318	125	296	744	1587	539	GO:0048366;GO:0010087;GO:0010305;GO:0010588;GO:0005576;	BP;BP;BP;BP;CC;	leaf development;phloem or xylem histogenesis;leaf vascular tissue pattern formation;cotyledon vascular tissue pattern formation;extracellular region;	-	-	-	glycine-rich protein DOT1-like [Brassica napus]	-	-	Glycine-rich protein DOT1 OS=Arabidopsis thaliana OX=3702 GN=DOT1 PE=2 SV=1	3HX6N	-	-	-	-	-	-	-	-	-	-	-
BnaC01G0081800ZS	BnaC01G0081800ZS	1.90254	-3.7597	3.48855e-06	0.00107517	down	0.371037	0.631953	1.46553	4.64049	24.999	2.37597	9	13	26	82	576	49	-	-	-	-	-	-	glycine-rich protein DOT1 [Brassica napus]	-	-	-	3I0NB	S	Glycine-rich cell wall structural protein 1	-	-	-	-	-	-	-	-	-
BnaC05G0107500ZS	BnaC05G0107500ZS	2.37109	1.59609	3.57669e-06	0.00109429	up	6.50739	6.26335	9.75158	1.48438	2.85781	2.41157	182	154	211	33	82	61	GO:0005634;GO:0009738;GO:0006952;GO:0009789;GO:0009637;GO:0045735;GO:0009651;GO:0019760;GO:0080149;GO:0000976;GO:0003677;GO:0042803;GO:0006355;GO:0005737;GO:0017148;GO:0045893;GO:0009267;GO:0046982;GO:0042802;GO:2000693;GO:0003700;GO:0043565;GO:0005829;GO:0009737;GO:0009845;GO:0006971;GO:0009414;GO:0009744;	CC;BP;BP;BP;BP;MF;BP;BP;BP;MF;MF;MF;BP;CC;BP;BP;BP;MF;MF;BP;MF;MF;CC;BP;BP;BP;BP;BP;	nucleus;abscisic acid-activated signaling pathway;defense response;positive regulation of abscisic acid-activated signaling pathway;response to blue light;nutrient reservoir activity;response to salt stress;glucosinolate metabolic process;sucrose induced translational repression;transcription cis-regulatory region binding;DNA binding;protein homodimerization activity;regulation of DNA-templated t…	-	-	-	basic leucine zipper 43 [Brassica napus]	PF00170.25	bZIP transcription factor	Basic leucine zipper 43 OS=Arabidopsis thaliana OX=3702 GN=BZIP43 PE=1 SV=1	3I028	K	arabidopsis thaliana basic leucine-zipper	-	-	-	-	-	-	-	-	bZIP
BnaC03G0086400ZS	BnaC03G0086400ZS	3.26302	-0.760844	3.62056e-06	0.00109968	nonsig	7.25593	6.19486	7.10221	10.9045	11.1519	10.2422	1284	965	972	1511	2029	1636	GO:0070062;GO:0043621;GO:0006952;GO:0004016;GO:0012505;GO:0007165;GO:0034644;GO:0071456;GO:0000166;GO:0010811;GO:0005737;GO:0003729;GO:0006308;GO:0051865;GO:0006914;GO:0002758;GO:0009941;GO:0043531;GO:0006171;GO:0010082;GO:0000139;GO:0000209;GO:0009409;GO:0140376;GO:0004842;GO:0034052;GO:0042803;GO:1904417;GO:0009862;GO:0050832;GO:0009626;GO:0009733;GO:0019677;GO:0016787;GO:0010087;GO:0003700;GO:…	CC;MF;BP;MF;CC;BP;BP;BP;MF;BP;CC;MF;BP;BP;BP;BP;CC;MF;BP;BP;CC;BP;BP;MF;MF;BP;MF;BP;BP;BP;BP;BP;BP;MF;BP;MF;MF;BP;CC;BP;BP;MF;BP;MF;CC;CC;BP;BP;MF;BP;MF;CC;MF;BP;BP;CC;BP;MF;BP;MF;BP;BP;CC;BP;CC;MF;BP;CC;BP;MF;BP;BP;BP;BP;BP;CC;BP;CC;BP;MF;CC;CC;BP;BP;BP;MF;MF;BP;BP;CC;BP;CC;BP;CC;BP;BP;BP;	extracellular exosome;obsolete protein self-association;defense response;adenylate cyclase activity;endomembrane system;signal transduction;cellular response to UV;cellular response to hypoxia;nucleotide binding;positive regulation of cell-substrate adhesion;cytoplasm;mRNA binding;DNA catabolic process;protein autoubiquitination;autophagy;innate immune response-activating signaling pathway;chloro…	-	-	-	PREDICTED: disease resistance-like protein CSA1 [Brassica oleracea var. oleracea]	PF01582.24	TIR domain	Disease resistance-like protein CSA1 OS=Arabidopsis thaliana OX=3702 GN=CSA1 PE=3 SV=1	3GCW1	S	RESISTANCE protein	COG4886	Leucine-rich repeat (LRR) protein	K	Transcription	-	-	-	-	-
BnaC04G0384600ZS	BnaC04G0384600ZS	3.13078	-1.05029	3.89551e-06	0.00117468	down	4.74538	5.94909	6.0611	10.4935	10.362	11.2669	296	326	293	512	664	634	-	-	-	-	-	-	uncharacterized protein LOC106436452 [Brassica napus]	PF03893.20	Lipase 3 N-terminal region	-	3HS41	IOT	Lipase 3 N-terminal region	-	-	-	-	KOG2088	[IOT]	Lipid transport and metabolism; Posttranslational modification, protein turnover, chaperones; Signal transduction mechanisms;	Predicted lipase/calmodulin-binding heat-shock protein	-
BnaC04G0007500ZS	BnaC04G0007500ZS	2.30963	-1.59093	3.96702e-06	0.00118426	down	1.61396	3.12762	2.20092	7.44892	5.59954	6.70928	186	317	194	661	655	693	GO:0070062;GO:0009723;GO:0010584;GO:0042998;GO:0106290;GO:0016405;GO:0008610;GO:0009651;GO:0043759;GO:0001666;GO:0020003;GO:0048545;GO:0016620;GO:0015645;GO:0070050;GO:0050218;GO:0043539;GO:0016874;GO:0005737;GO:0060996;GO:0009410;GO:2001236;GO:0032000;GO:0035338;GO:1905329;GO:0010143;GO:0005777;GO:0019432;GO:0015910;GO:0005794;GO:0070723;GO:0009941;GO:0009698;GO:0015908;GO:0031410;GO:0005741;GO:…	CC;BP;BP;BP;MF;MF;BP;BP;MF;BP;CC;BP;MF;MF;BP;MF;MF;MF;CC;BP;BP;BP;BP;BP;BP;BP;CC;BP;BP;CC;BP;CC;BP;BP;CC;CC;BP;BP;CC;BP;CC;MF;CC;CC;BP;BP;CC;BP;BP;BP;CC;BP;CC;BP;BP;MF;BP;BP;BP;BP;BP;MF;BP;BP;CC;BP;BP;MF;BP;MF;MF;MF;BP;BP;BP;MF;BP;BP;MF;MF;MF;BP;MF;BP;CC;BP;BP;BP;CC;BP;BP;MF;BP;BP;BP;BP;BP;BP;BP;BP;BP;BP;MF;BP;BP;CC;BP;CC;MF;BP;MF;MF;BP;BP;BP;MF;BP;BP;CC;CC;BP;BP;CC;BP;BP;MF;CC;CC;MF;MF;MF;BP;CC;…	extracellular exosome;response to ethylene;pollen exine formation;positive regulation of Golgi to plasma membrane protein transport;trans-cinnamate-CoA ligase activity;CoA-ligase activity;lipid biosynthetic process;response to salt stress;2-methylbutanoate-CoA ligase activity;response to hypoxia;symbiont-containing vacuole;response to steroid hormone;oxidoreductase activity, acting on the aldehyd…	K01897	ko00071;ko04146;ko01212;ko00061;ko01100	Fatty acid degradation;Peroxisome;Fatty acid metabolism;Fatty acid biosynthesis;Metabolic pathways	PREDICTED: long chain acyl-CoA synthetase 1-like isoform X2 [Brassica oleracea var. oleracea]	PF00501.32	AMP-binding enzyme	Long chain acyl-CoA synthetase 1 OS=Arabidopsis thaliana OX=3702 GN=LACS1 PE=2 SV=1	3HZFP	I	Long-chain-fatty-acid--CoA ligase family protein	COG1022	Long-chain acyl-CoA synthetase (AMP-forming)	I	Lipid transport and metabolism	KOG1256	[I]	Lipid transport and metabolism;	Long-chain acyl-CoA synthetases (AMP-forming)	-
BnaA03G0491300ZS	BnaA03G0491300ZS	3.09044	-1.09512	3.98381e-06	0.00118426	down	5.4422	3.92482	6.8373	9.99806	10.9259	10.7084	321	204	312	462	663	570	GO:0016651;GO:0005506;GO:0050113;GO:0050661;GO:0003014;GO:0008199;GO:0004033;GO:0005829;GO:0016701;GO:0019853;GO:0019310;GO:0016234;GO:0005737;GO:0016491;	MF;MF;MF;MF;BP;MF;MF;CC;MF;BP;BP;CC;CC;MF;	oxidoreductase activity, acting on NAD(P)H;iron ion binding;inositol oxygenase activity;NADP binding;renal system process;ferric iron binding;aldo-keto reductase (NADPH) activity;cytosol;oxidoreductase activity, acting on single donors with incorporation of molecular oxygen;L-ascorbic acid biosynthetic process;inositol catabolic process;inclusion body;cytoplasm;oxidoreductase activity;	K00469	ko00562;ko00053;ko01100	Inositol phosphate metabolism;Ascorbate and aldarate metabolism;Metabolic pathways	inositol oxygenase 4-like [Brassica napus]	PF05153.19	Myo-inositol oxygenase	Inositol oxygenase 4 OS=Arabidopsis thaliana OX=3702 GN=MIOX4 PE=1 SV=1	3HZS0	S	inositol oxygenase	-	-	-	-	KOG1573	[R]	General function prediction only;	Aldehyde reductase	-
BnaC09G0527400ZS	BnaC09G0527400ZS	3.72379	-1.70187	4.09538e-06	0.00120886	down	5.96637	9.94152	5.1976	22.7806	27.155	15.8168	483	708	326	1443	2260	1156	GO:0018874;GO:0016597;GO:0070406;GO:0102057;GO:0071365;GO:1900424;GO:0052626;GO:0005634;GO:0019899;GO:2000030;GO:0009507;GO:0006952;GO:0010224;GO:0052625;GO:0070728;GO:1901183;GO:0016046;GO:0102053;GO:0140964;GO:0071456;GO:0034052;GO:0010120;GO:0016874;GO:0009863;GO:0009734;GO:0005737;GO:0009626;GO:0009733;GO:0009416;GO:0009851;GO:0009864;GO:0052628;GO:0010249;GO:0052627;GO:0010046;GO:0005829;GO:…	BP;MF;MF;MF;BP;BP;MF;CC;MF;BP;CC;BP;BP;MF;MF;BP;BP;MF;BP;BP;BP;BP;MF;BP;BP;CC;BP;BP;BP;BP;BP;MF;BP;MF;BP;CC;MF;CC;BP;BP;MF;MF;BP;MF;BP;MF;BP;	benzoate metabolic process;amino acid binding;glutamine binding;obsolete jasmonoyl-valine synthetase activity;cellular response to auxin stimulus;regulation of defense response to bacterium;N-benzoyl-L-glutamate synthetase activity;nucleus;enzyme binding;regulation of response to red or far red light;chloroplast;defense response;response to UV-B;N-(4-aminobenzoyl)-L-glutamate synthetase activity;…	-	ko04075	Plant hormone signal transduction	4-substituted benzoates-glutamate ligase GH3.12-like [Brassica napus]	PF03321.17	GH3 auxin-responsive promoter	4-substituted benzoates-glutamate ligase GH3.12 OS=Arabidopsis thaliana OX=3702 GN=GH3.12 PE=1 SV=1	3I1VV	S	4-substituted benzoates-glutamate ligase GH3.12-like	COG0189	Glutathione synthase, LysX or RimK-type ligase, ATP-grasp superfamily	EHJQ	-	-	-	-	-	-
BnaA03G0078100ZS	BnaA03G0078100ZS	5.37893	-0.888896	4.16574e-06	0.00122103	nonsig	29.0368	26.042	39.0878	60.0869	52.916	47.4107	1646	1298	1714	2667	3086	2427	GO:0031625;GO:0005524;GO:0005634;GO:0009738;GO:0004713;GO:0031663;GO:0006468;GO:0071215;GO:0000325;GO:0048046;GO:0005739;GO:0045087;GO:0004712;GO:0099503;GO:0004675;GO:0004672;GO:0030246;GO:0071456;GO:0005539;GO:0009620;GO:0005886;GO:0046777;GO:0060320;GO:0006955;GO:0106310;GO:0042802;GO:0005516;GO:0032497;GO:1904383;GO:0005829;GO:0002221;GO:0005576;GO:0016310;GO:0048544;GO:0016020;GO:0005794;GO:…	MF;MF;CC;BP;MF;BP;BP;BP;CC;CC;CC;BP;MF;CC;MF;MF;MF;BP;MF;BP;CC;BP;BP;BP;MF;MF;MF;BP;BP;CC;BP;CC;BP;BP;CC;CC;MF;BP;CC;BP;CC;CC;MF;	ubiquitin protein ligase binding;ATP binding;nucleus;abscisic acid-activated signaling pathway;protein tyrosine kinase activity;lipopolysaccharide-mediated signaling pathway;protein phosphorylation;cellular response to abscisic acid stimulus;plant-type vacuole;apoplast;mitochondrion;innate immune response;protein serine/threonine/tyrosine kinase activity;secretory vesicle;transmembrane receptor p…	-	-	-	G-type lectin S-receptor-like serine/threonine-protein kinase At1g67520 [Brassica napus]	PF01453.28	D-mannose binding lectin	G-type lectin S-receptor-like serine/threonine-protein kinase At1g67520 OS=Arabidopsis thaliana OX=3702 GN=At1g67520 PE=2 SV=3	3HW33	T	G-type lectin S-receptor-like serine threonine-protein kinase	-	-	-	-	-	-	-	-	-
BnaC09G0039900ZS	BnaC09G0039900ZS	5.89901	-1.61923	4.24094e-06	0.00123444	down	27.6701	50.0177	27.6264	92.1199	107.156	106.071	535	850	413	1394	2130	1850	-	-	-	-	-	-	glutamic acid-rich protein [Brassica napus]	PF15341.10	Ribosome biogenesis protein SLX9	-	3I197	S	BEST Arabidopsis thaliana protein match is glycine-rich protein (TAIR AT5G28630.1)	-	-	-	-	-	-	-	-	-
BnaC08G0248800ZS	BnaC08G0248800ZS	2.72431	-1.41345	4.3121e-06	0.0012465	down	3.70585	3.92835	2.97754	9.70865	11.2219	5.89874	486	453	303	997	1514	699	GO:0051592;GO:0060613;GO:0080008;GO:0048573;GO:1902953;GO:0031490;GO:0003682;GO:0000976;GO:0070050;GO:0005737;GO:0005700;GO:0045893;GO:0060612;GO:0007059;GO:0035591;GO:0071482;GO:1904263;GO:0007029;GO:0043153;GO:0042461;GO:0090263;GO:0005794;GO:0005198;GO:0007281;GO:0032436;GO:0006998;GO:0035859;GO:0042393;GO:0007049;GO:0090070;GO:0022416;GO:0030127;GO:0005730;GO:0012507;GO:0016042;GO:0000122;GO:…	BP;BP;CC;BP;BP;MF;MF;MF;BP;CC;CC;BP;BP;BP;MF;BP;BP;BP;BP;BP;BP;CC;MF;BP;BP;BP;CC;MF;BP;BP;BP;CC;CC;CC;BP;BP;BP;BP;CC;BP;BP;BP;BP;MF;BP;BP;BP;CC;BP;BP;BP;CC;BP;CC;CC;BP;BP;BP;MF;CC;BP;CC;BP;BP;BP;CC;BP;BP;BP;CC;BP;CC;CC;MF;BP;BP;CC;BP;BP;CC;BP;CC;BP;BP;CC;CC;BP;CC;CC;BP;BP;BP;MF;BP;BP;BP;CC;BP;MF;BP;BP;CC;BP;	response to calcium ion;fat pad development;Cul4-RING E3 ubiquitin ligase complex;photoperiodism, flowering;positive regulation of ER to Golgi vesicle-mediated transport;chromatin DNA binding;chromatin binding;transcription cis-regulatory region binding;neuron cellular homeostasis;cytoplasm;polytene chromosome;positive regulation of DNA-templated transcription;adipose tissue development;chromosom…	K14005	ko04141	Protein processing in endoplasmic reticulum	protein transport protein SEC31 homolog A [Brassica napus]	PF00400.36	WD domain, G-beta repeat	Protein transport protein SEC31 homolog A OS=Arabidopsis thaliana OX=3702 GN=SEC31A PE=1 SV=1	3HQ3C	U	Protein transport protein SEC31 homolog	COG5635	Predicted NTPase, NACHT family domain	T	Signal transduction mechanisms	KOG0307	[U]	Intracellular trafficking, secretion, and vesicular transport;	Vesicle coat complex COPII, subunit SEC31	-
BnaA04G0294100ZS	BnaA04G0294100ZS	2.43015	-1.54485	4.46473e-06	0.00128177	down	3.66998	1.89965	2.37451	6.66619	9.17421	5.87615	192	88	96	273	493	277	-	-	-	-	-	-	proline-rich receptor-like protein kinase PERK9 [Brassica napus]	-	-	-	3HUPM	S	Vegetative cell wall protein	COG3087	Cell division protein FtsN	D	Cell cycle control, cell division, chromosome partitioning	-	-	-	-	-
BnaC03G0167900ZS	BnaC03G0167900ZS	3.4696	-1.32998	4.5332e-06	0.00129258	down	7.55382	5.25579	6.99485	14.2684	14.4833	17.2732	95	58	68	140	186	195	-	-	-	-	-	-	-	-	-	-	-	-	-	-	-	-	-	-	-	-	-	-
BnaC03G0210100ZS	BnaC03G0210100ZS	1.28116	-1.86183	4.56863e-06	0.00129388	down	0.479803	0.530697	1.23568	2.63032	2.04647	2.67922	34	34	68	146	150	172	GO:0032715;GO:0030027;GO:0030424;GO:0098793;GO:0002376;GO:0007032;GO:0052744;GO:0030317;GO:0090315;GO:0007165;GO:0009637;GO:0010801;GO:0014015;GO:0009651;GO:0046488;GO:0005769;GO:1990649;GO:0043058;GO:0006897;GO:0032880;GO:1990640;GO:0030479;GO:0009743;GO:0007010;GO:0040011;GO:0001750;GO:0005737;GO:2000369;GO:0045893;GO:0009410;GO:0097730;GO:0008340;GO:0042169;GO:0035810;GO:0009753;GO:0032870;GO:…	BP;CC;CC;CC;BP;BP;MF;BP;BP;BP;BP;BP;BP;BP;BP;CC;MF;BP;BP;BP;MF;CC;BP;BP;BP;CC;CC;BP;BP;BP;CC;BP;MF;BP;BP;BP;BP;BP;BP;BP;BP;CC;CC;BP;MF;MF;BP;BP;BP;MF;CC;CC;BP;CC;BP;BP;BP;BP;MF;CC;BP;BP;CC;CC;CC;BP;BP;BP;BP;BP;BP;BP;CC;MF;CC;MF;MF;BP;BP;BP;BP;BP;BP;MF;BP;MF;CC;CC;BP;BP;CC;BP;CC;CC;BP;BP;MF;MF;CC;BP;CC;BP;BP;BP;MF;BP;BP;CC;BP;CC;CC;BP;CC;BP;BP;BP;CC;MF;CC;BP;CC;MF;BP;BP;BP;BP;BP;BP;CC;BP;MF;BP;BP;…	negative regulation of interleukin-6 production;lamellipodium;axon;presynapse;immune system process;endosome organization;phosphatidylinositol monophosphate phosphatase activity;flagellated sperm motility;negative regulation of protein targeting to membrane;signal transduction;response to blue light;negative regulation of peptidyl-threonine phosphorylation;positive regulation of gliogenesis;respo…	-	-	-	type I inositol polyphosphate 5-phosphatase 8 [Brassica napus]	PF03372.27	Endonuclease/Exonuclease/phosphatase family	Type I inositol polyphosphate 5-phosphatase 8 OS=Arabidopsis thaliana OX=3702 GN=IP5P8 PE=2 SV=1	3HNY3	U	Type I inositol 1,4,5-trisphosphate 5-phosphatase CVP2-like	-	-	-	-	KOG0565	[U]	Intracellular trafficking, secretion, and vesicular transport;	Inositol polyphosphate 5-phosphatase and related proteins	-
BnaA02G0190000ZS	BnaA02G0190000ZS	2.42382	-1.46629	4.67405e-06	0.00131133	down	1.96307	3.51222	2.5448	6.95047	7.0509	6.86859	90	141	90	247	329	282	GO:0000325;GO:0006952;GO:0051707;GO:0048046;GO:0005739;GO:0099503;GO:0004672;GO:0005537;GO:0006979;GO:0009751;GO:0005886;GO:0050832;GO:0012501;GO:0010497;GO:0009506;GO:0106310;GO:0046739;GO:0005829;GO:0009737;GO:0005576;GO:0016020;GO:0016310;GO:0004674;GO:0009505;GO:0042742;GO:0005524;GO:0031640;GO:0009627;	CC;BP;BP;CC;CC;CC;MF;MF;BP;BP;CC;BP;BP;BP;CC;MF;BP;CC;BP;CC;CC;BP;MF;CC;BP;MF;BP;BP;	plant-type vacuole;defense response;response to other organism;apoplast;mitochondrion;secretory vesicle;protein kinase activity;D-mannose binding;response to oxidative stress;response to salicylic acid;plasma membrane;defense response to fungus;programmed cell death;plasmodesmata-mediated intercellular transport;plasmodesma;protein serine kinase activity;transport of virus in multicellular host;c…	-	-	-	plasmodesmata-located protein 5 [Brassica rapa]	PF01657.21	Salt stress response/antifungal	Plasmodesmata-located protein 5 OS=Arabidopsis thaliana OX=3702 GN=PDLP5 PE=1 SV=1	3GGUF	S	cysteine-rich repeat secretory protein	-	-	-	-	-	-	-	-	-
BnaC09G0066100ZS	BnaC09G0066100ZS	1.45719	1.20118	4.69283e-06	0.00131133	up	2.08472	2.67252	3.28453	1.06578	1.06122	1.07331	233	262	284	94	122	109	GO:0010492;GO:0032993;GO:0009585;GO:0045892;GO:0048367;GO:0016887;GO:0010082;GO:0005634;GO:0009723;GO:0010017;GO:0010119;GO:0019827;GO:0009507;GO:0048579;GO:0000156;GO:0009735;GO:0031537;GO:0005739;GO:0071368;GO:2000022;GO:0009736;GO:2000142;GO:0009787;GO:2000028;GO:0032892;GO:0090506;GO:0080036;GO:0000976;GO:0048576;GO:0001108;GO:0000987;GO:0006808;GO:0010629;GO:0003677;GO:0048364;GO:0046777;GO:…	BP;CC;BP;BP;BP;MF;BP;CC;BP;BP;BP;BP;CC;BP;MF;BP;BP;CC;BP;BP;BP;BP;BP;BP;BP;BP;BP;MF;BP;MF;MF;BP;BP;MF;BP;BP;BP;BP;BP;CC;BP;BP;BP;BP;MF;BP;BP;BP;MF;MF;BP;MF;MF;CC;BP;BP;BP;CC;BP;BP;MF;BP;BP;BP;BP;BP;BP;BP;MF;BP;BP;BP;	maintenance of shoot apical meristem identity;protein-DNA complex;red, far-red light phototransduction;negative regulation of DNA-templated transcription;shoot system development;ATP hydrolysis activity;regulation of root meristem growth;nucleus;response to ethylene;red or far-red light signaling pathway;regulation of stomatal movement;stem cell population maintenance;chloroplast;negative regulat…	K12127	ko04712	Circadian rhythm - plant	two-component response regulator-like APRR1 isoform X2 [Brassica napus]	PF00072.28	Response regulator receiver domain	Two-component response regulator-like APRR1 OS=Arabidopsis thaliana OX=3702 GN=APRR1 PE=1 SV=1	3HUI0	K	Two-component response	COG0745	DNA-binding response regulator, OmpR family, contains REC and winged-helix (wHTH) domain	TK	-	KOG1601	[K]	Transcription;	GATA-4/5/6 transcription factors	-
BnaA01G0385400ZS	BnaA01G0385400ZS	0.758443	-2.80884	4.76379e-06	0.00132235	down	0.287364	0.132567	0.215702	2.54998	0.798734	1.07061	15	6	9	99	41	48	GO:0010193;GO:0009611;GO:0009507;GO:0010224;	BP;BP;CC;BP;	response to ozone;response to wounding;chloroplast;response to UV-B;	-	-	-	UV-B-induced protein At3g17800, chloroplastic-like [Brassica napus]	PF05542.15	Protein of unknown function (DUF760)	UV-B-induced protein At3g17800, chloroplastic OS=Arabidopsis thaliana OX=3702 GN=At3g17800 PE=2 SV=1	3HN9B	S	Protein of unknown function (DUF760)	-	-	-	-	-	-	-	-	-
BnaC03G0398200ZS	BnaC03G0398200ZS	2.04118	-2.01835	4.80342e-06	0.00132457	down	1.27237	2.43721	0.895159	5.22281	7.40999	5.27522	193	325	105	620	1156	722	GO:0070062;GO:0051701;GO:1904322;GO:0055062;GO:0015127;GO:0015164;GO:0032310;GO:0042167;GO:0046943;GO:0033198;GO:0030335;GO:0046686;GO:0009651;GO:0005769;GO:0030315;GO:0060081;GO:0008514;GO:0015143;GO:0048545;GO:0051597;GO:0140357;GO:0055085;GO:0015718;GO:0046581;GO:0071549;GO:0070633;GO:0140928;GO:0009267;GO:0033700;GO:0016323;GO:0009410;GO:0015711;GO:0098591;GO:1990573;GO:0031016;GO:0015108;GO:…	CC;BP;BP;BP;MF;MF;BP;BP;MF;BP;BP;BP;BP;CC;CC;BP;MF;MF;BP;BP;BP;BP;BP;CC;BP;BP;BP;BP;BP;CC;BP;BP;CC;BP;BP;MF;BP;MF;BP;MF;BP;CC;CC;BP;CC;CC;BP;BP;MF;BP;MF;CC;BP;CC;BP;BP;BP;CC;BP;BP;CC;BP;BP;BP;MF;MF;BP;BP;MF;BP;BP;BP;BP;BP;CC;BP;BP;BP;CC;BP;MF;BP;BP;CC;BP;BP;MF;MF;BP;BP;CC;BP;BP;BP;CC;CC;MF;BP;BP;MF;MF;MF;BP;BP;BP;BP;BP;BP;BP;BP;CC;BP;BP;BP;BP;CC;MF;MF;MF;BP;BP;BP;BP;BP;BP;BP;MF;BP;MF;BP;MF;BP;MF;…	extracellular exosome;biological process involved in interaction with host;cellular response to forskolin;phosphate ion homeostasis;bilirubin transmembrane transporter activity;glucuronoside transmembrane transporter activity;prostaglandin secretion;heme catabolic process;carboxylic acid transmembrane transporter activity;response to ATP;positive regulation of cell migration;response to cadmium i…	-	-	-	ABC transporter C family member 3 [Brassica napus]	PF00664.27	ABC transporter transmembrane region	ABC transporter C family member 3 OS=Arabidopsis thaliana OX=3702 GN=ABCC3 PE=1 SV=1	3HR4C	Q	ATPase activity, coupled to transmembrane movement of substances	COG1132	ABC-type multidrug transport system, ATPase and permease component	V	Defense mechanisms	KOG0054	[Q]	Secondary metabolites biosynthesis, transport and catabolism;	Multidrug resistance-associated protein/mitoxantrone resistance protein, ABC superfamily	-
BnaA03G0134100ZS	BnaA03G0134100ZS	2.5955	-2.58161	5.04906e-06	0.00138321	down	1.55967	1.99058	3.09678	13.3119	4.63226	18.2828	23	26	35	151	69	238	GO:0046872;	MF;	metal ion binding;	-	-	-	heavy metal-associated isoprenylated plant protein 10-like [Brassica napus]	-	-	Heavy metal-associated isoprenylated plant protein 10 OS=Arabidopsis thaliana OX=3702 GN=HIPP10 PE=3 SV=1	-	-	-	-	-	-	-	-	-	-	-	-
BnaC04G0553400ZS	BnaC04G0553400ZS	2.73043	-2.49455	5.15402e-06	0.0014028	down	2.0262	3.59704	1.93407	12.6252	23.7364	5.21051	57	88	42	274	677	131	GO:0042752;GO:0042538;GO:0005634;GO:0000325;GO:0006952;GO:0048046;GO:0009664;GO:0097167;GO:0005739;GO:0009409;GO:0099503;GO:0009651;GO:0042744;GO:0006979;GO:0071456;GO:0020037;GO:0004601;GO:0010089;GO:0048658;GO:0009269;GO:0005509;GO:0010043;GO:0009877;GO:0140825;GO:0080001;GO:0005886;GO:0050832;GO:0005737;GO:0009044;GO:0009416;GO:0010228;GO:0009808;GO:0003729;GO:0046872;GO:0048511;GO:0045730;GO:…	BP;BP;CC;CC;BP;CC;BP;BP;CC;BP;CC;BP;BP;BP;BP;MF;MF;BP;BP;BP;MF;BP;BP;MF;BP;CC;BP;CC;MF;BP;BP;BP;MF;MF;BP;BP;BP;BP;BP;CC;BP;CC;BP;BP;CC;BP;CC;CC;BP;CC;BP;BP;BP;CC;BP;	regulation of circadian rhythm;hyperosmotic salinity response;nucleus;plant-type vacuole;defense response;apoplast;plant-type cell wall organization;circadian regulation of translation;mitochondrion;response to cold;secretory vesicle;response to salt stress;hydrogen peroxide catabolic process;response to oxidative stress;cellular response to hypoxia;heme binding;peroxidase activity;xylem developm…	K00430	ko00940;ko01100;ko01110	Phenylpropanoid biosynthesis;Metabolic pathways;Biosynthesis of secondary metabolites	peroxidase 21 [Brassica napus]	PF00141.27	Peroxidase	Peroxidase 21 OS=Arabidopsis thaliana OX=3702 GN=PER21 PE=1 SV=1	3HRAY	Q	Removal of H(2)O(2), oxidation of toxic reductants, biosynthesis and degradation of lignin, suberization, auxin catabolism, response to environmental stresses such as wounding, pathogen attack and oxidative stress	-	-	-	-	-	-	-	-	-
MSTRG.47681.5	MSTRG.47681.5	0.360839	2.40994	5.35506e-06	0.00144333	up	0.625566	0.343534	0.608599	0.041204	0.153334	0.063037	102	49	77	6	26	10	GO:0000166;GO:0005737;GO:0042802;GO:0043531;GO:0008219;GO:0009617;GO:0006952;GO:0005634;GO:0009626;GO:0005886;GO:0038023;GO:0042742;GO:0005524;	MF;CC;MF;MF;BP;BP;BP;CC;BP;CC;MF;BP;MF;	nucleotide binding;cytoplasm;identical protein binding;ADP binding;cell death;response to bacterium;defense response;nucleus;plant-type hypersensitive response;plasma membrane;signaling receptor activity;defense response to bacterium;ATP binding;	-	-	-	probable disease resistance protein At1g12290 isoform X2 [Brassica napus]	PF00931.26	NB-ARC domain	Probable disease resistance protein At1g12290 OS=Arabidopsis thaliana OX=3702 GN=At1g12290 PE=3 SV=1	3GBWJ	T	Belongs to the disease resistance NB-LRR family	COG2319	WD40 repeat	R	General function prediction only	KOG4658	[T]	Signal transduction mechanisms;	Apoptotic ATPase	-
BnaC03G0346300ZS	BnaC03G0346300ZS	6.72565	-0.841417	5.37182e-06	0.00144333	nonsig	70.239	81.4228	93.5876	145.55	131.269	129.522	2556	2605	2635	4147	4915	4255	GO:0071456;GO:0060776;GO:0009739;GO:0000976;GO:0006807;GO:0006355;	BP;BP;BP;MF;BP;BP;	cellular response to hypoxia;simple leaf morphogenesis;response to gibberellin;transcription cis-regulatory region binding;obsolete nitrogen compound metabolic process;regulation of DNA-templated transcription;	-	-	-	LOB domain-containing protein 41-like [Brassica napus]	PF03195.18	Lateral organ boundaries (LOB) domain	LOB domain-containing protein 41 OS=Arabidopsis thaliana OX=3702 GN=LBD41 PE=2 SV=1	3HP4I	S	lob domain-containing protein	-	-	-	-	-	-	-	-	LOB
BnaA05G0489000ZS	BnaA05G0489000ZS	3.52917	-1.08573	5.47521e-06	0.00146174	down	7.97138	6.98852	7.50109	13.8135	17.2085	13.4072	134	104	98	182	298	204	-	-	-	-	-	-	late embryogenesis abundant protein At5g17165-like [Brassica napus]	PF03242.17	Late embryogenesis abundant protein	Late embryogenesis abundant protein At5g17165 OS=Arabidopsis thaliana OX=3702 GN=At5g17165 PE=3 SV=1	3HV0Q	-	-	-	-	-	-	-	-	-	-	-
BnaC07G0219800ZS	BnaC07G0219800ZS	2.11774	-1.24756	5.62667e-06	0.00149267	down	2.16149	2.53171	1.9054	5.54229	4.84045	4.39205	118	122	81	237	272	216	GO:0006952;GO:0006513;GO:0012505;GO:0005769;GO:0071456;GO:0042631;GO:0009535;GO:0005737;GO:0009909;GO:0051865;GO:0033591;GO:0030100;GO:0032991;GO:0009617;GO:0065003;GO:0009793;GO:0031625;GO:1904300;GO:0009507;GO:0000139;GO:0000209;GO:0000578;GO:0000122;GO:0004842;GO:0060816;GO:0007409;GO:0048443;GO:0050832;GO:0008270;GO:0008432;GO:0030247;GO:0098542;GO:0002238;GO:0042742;GO:1901000;GO:0015031;GO:…	BP;BP;CC;CC;BP;BP;CC;CC;BP;BP;BP;BP;CC;BP;BP;BP;MF;BP;CC;CC;BP;BP;BP;MF;BP;BP;BP;BP;MF;MF;MF;BP;BP;BP;BP;BP;MF;CC;BP;BP;CC;BP;MF;BP;MF;BP;CC;BP;CC;BP;CC;BP;BP;BP;CC;BP;MF;BP;BP;CC;BP;BP;CC;CC;CC;BP;BP;BP;CC;CC;CC;BP;BP;MF;CC;MF;BP;CC;BP;BP;CC;BP;BP;BP;BP;MF;BP;BP;BP;CC;CC;	defense response;protein monoubiquitination;endomembrane system;early endosome;cellular response to hypoxia;cellular response to water deprivation;chloroplast thylakoid membrane;cytoplasm;regulation of flower development;protein autoubiquitination;response to L-ascorbic acid;regulation of endocytosis;protein-containing complex;response to bacterium;protein-containing complex assembly;embryo devel…	-	-	-	RING-H2 finger protein ATL16-like [Brassica napus]	PF13639.10	Ring finger domain	RING-H2 finger protein ATL16 OS=Arabidopsis thaliana OX=3702 GN=ATL16 PE=2 SV=1	3HP76	O	RING-H2 finger protein	-	-	-	-	KOG0799	[G]	Carbohydrate transport and metabolism;	Branching enzyme	-
BnaC08G0513400ZS	BnaC08G0513400ZS	1.80291	1.75006	5.72934e-06	0.00151035	up	5.89687	3.85314	3.7712	1.46584	1.44934	0.870981	165	95	82	32	42	22	-	-	-	-	-	-	uncharacterized protein LOC111209145 isoform X2 [Brassica napus]	-	-	-	-	-	-	-	-	-	-	-	-	-	-	-
BnaC06G0436100ZS	BnaC06G0436100ZS	2.49944	1.03191	5.82387e-06	0.00152567	up	7.27873	6.34323	6.91295	2.67907	3.62041	2.99782	538	412	395	155	276	200	GO:0045892;GO:0005634;GO:0048653;GO:0006952;GO:0009751;GO:0000976;GO:0000987;GO:0003677;GO:0042803;GO:0009863;GO:0009862;GO:0005737;GO:0009626;GO:0045893;GO:1905623;GO:0009733;GO:0009909;GO:0071588;GO:0009410;GO:0016787;GO:0009753;GO:0046872;GO:0042802;GO:0005516;GO:0003700;GO:0090575;GO:0043565;GO:0090571;GO:0098542;GO:0006351;GO:0042742;GO:0002237;	BP;CC;BP;BP;BP;MF;MF;MF;MF;BP;BP;CC;BP;BP;BP;BP;BP;BP;BP;MF;BP;MF;MF;MF;MF;CC;MF;CC;BP;BP;BP;BP;	negative regulation of DNA-templated transcription;nucleus;anther development;defense response;response to salicylic acid;transcription cis-regulatory region binding;cis-regulatory region sequence-specific DNA binding;DNA binding;protein homodimerization activity;salicylic acid mediated signaling pathway;systemic acquired resistance, salicylic acid mediated signaling pathway;cytoplasm;plant-type …	K14431	ko04075	Plant hormone signal transduction	transcription factor TGA7-like [Brassica napus]	PF14144.10	Seed dormancy control	Transcription factor TGA7 OS=Arabidopsis thaliana OX=3702 GN=TGA7 PE=1 SV=1	3HR2J	K	transcription factor	-	-	-	-	-	-	-	-	-
BnaA06G0389300ZS	BnaA06G0389300ZS	2.80583	1.15367	5.88997e-06	0.00153341	up	8.94439	9.8365	8.76583	3.5602	3.63801	4.25224	444	429	336	139	186	191	-	-	-	-	-	-	uncharacterized protein BNAA06G32810D [Brassica napus]	PF07719.21	Tetratricopeptide repeat	-	3HMK9	-	-	COG5777	Uncharacterized cyanobacterial/plant membrane protein Pro0498, contains N-terminal TPR repeats	C	Energy production and conversion	-	-	-	-	-
BnaC07G0348000ZS	BnaC07G0348000ZS	2.98534	0.783283	6.51185e-06	0.00167316	nonsig	8.99465	8.38156	10.8517	4.75848	5.35892	5.0609	1595	1306	1476	661	954	810	GO:0007097;GO:0006891;GO:0090114;GO:0045892;GO:0070863;GO:0043332;GO:0051301;GO:0009867;GO:0005634;GO:0043005;GO:0000139;GO:0047496;GO:0062208;GO:0005875;GO:0003714;GO:1902953;GO:0030127;GO:0000776;GO:0070971;GO:0000122;GO:0048854;GO:0006890;GO:0051010;GO:0042803;GO:0005886;GO:0005635;GO:0070840;GO:0005789;GO:0006355;GO:0005737;GO:0005874;GO:0009733;GO:0010229;GO:0006888;GO:0042802;GO:0140311;GO:…	BP;BP;BP;BP;BP;CC;BP;BP;CC;CC;CC;BP;BP;CC;MF;BP;CC;CC;CC;BP;BP;BP;MF;MF;CC;CC;MF;CC;BP;CC;CC;BP;BP;BP;MF;MF;CC;BP;BP;BP;CC;BP;BP;CC;BP;BP;MF;CC;BP;BP;CC;BP;BP;CC;BP;	nuclear migration;intra-Golgi vesicle-mediated transport;COPII-coated vesicle budding;negative regulation of DNA-templated transcription;positive regulation of protein exit from endoplasmic reticulum;mating projection tip;cell division;jasmonic acid mediated signaling pathway;nucleus;neuron projection;Golgi membrane;vesicle transport along microtubule;positive regulation of pattern recognition re…	-	-	-	topless-related protein 3 [Brassica napus]	PF00400.36	WD domain, G-beta repeat	Topless-related protein 3 OS=Arabidopsis thaliana OX=3702 GN=TPR3 PE=1 SV=1	3HY16	S	Topless-related	COG2319	WD40 repeat	R	General function prediction only	KOG0266	[R]	General function prediction only;	WD40 repeat-containing protein	-
BnaA07G0390200ZS	BnaA07G0390200ZS	3.94494	0.931009	6.51972e-06	0.00167316	nonsig	22.3543	17.2333	22.4696	11.0165	9.89097	9.2021	523	355	407	202	238	195	GO:0070062;GO:0005689;GO:0016607;GO:0005634;GO:0048026;GO:0000978;GO:0030619;GO:0009631;GO:0019099;GO:0006397;GO:0005654;GO:0048477;GO:0005681;GO:0001650;GO:1990904;GO:0071347;GO:0044530;GO:0006366;GO:0071004;GO:0005730;GO:0005685;GO:0008266;GO:0003723;GO:0003682;GO:0051260;GO:0005684;GO:0048025;GO:0070990;GO:0071013;GO:0045944;GO:0000791;GO:0003677;GO:0097158;GO:0000381;GO:0005737;GO:0003729;GO:…	CC;CC;CC;CC;BP;MF;MF;BP;BP;BP;CC;BP;CC;CC;CC;BP;CC;BP;CC;CC;CC;MF;MF;MF;BP;CC;BP;MF;CC;BP;CC;MF;MF;BP;CC;MF;CC;MF;BP;CC;CC;CC;BP;BP;BP;CC;MF;BP;MF;CC;MF;CC;BP;CC;BP;MF;CC;	extracellular exosome;U12-type spliceosomal complex;nuclear speck;nucleus;positive regulation of mRNA splicing, via spliceosome;RNA polymerase II cis-regulatory region sequence-specific DNA binding;U1 snRNA binding;cold acclimation;female germ-line sex determination;mRNA processing;nucleoplasm;oogenesis;spliceosomal complex;fibrillar center;ribonucleoprotein complex;cellular response to interleuk…	-	ko03040	Spliceosome	PREDICTED: U1 small nuclear ribonucleoprotein A [Tarenaya hassleriana]	PF00076.26	RNA recognition motif	U1 small nuclear ribonucleoprotein A OS=Arabidopsis thaliana OX=3702 GN=U1A PE=1 SV=1	3HRM8	A	U1 small nuclear ribonucleoprotein	-	-	-	-	KOG4206	[A]	RNA processing and modification;	Spliceosomal protein snRNP-U1A/U2B	-
BnaA05G0483900ZS	BnaA05G0483900ZS	3.78042	-1.13812	6.54654e-06	0.00167316	down	8.1462	8.5837	10.2534	14.1742	20.6816	19.7421	404	374	393	550	1055	884	GO:0070062;GO:0004365;GO:0043123;GO:0043066;GO:0050821;GO:0005975;GO:1990904;GO:0006094;GO:0046686;GO:0080144;GO:0032481;GO:0051775;GO:0015630;GO:0005737;GO:0045893;GO:1905460;GO:0046166;GO:0043209;GO:0009277;GO:0005777;GO:0000226;GO:1990841;GO:0070403;GO:0009408;GO:0032991;GO:0098978;GO:0019826;GO:0072593;GO:0010154;GO:0005507;GO:0045335;GO:0061621;GO:0050661;GO:0009536;GO:0009507;GO:0016241;GO:…	CC;MF;BP;BP;BP;BP;CC;BP;BP;BP;BP;BP;CC;CC;BP;BP;BP;CC;CC;CC;BP;MF;MF;BP;CC;CC;MF;BP;BP;MF;CC;BP;MF;CC;CC;BP;BP;BP;CC;BP;CC;CC;MF;MF;MF;MF;CC;BP;MF;MF;MF;BP;CC;CC;BP;CC;MF;BP;CC;MF;MF;CC;MF;BP;BP;BP;BP;BP;BP;CC;BP;CC;BP;BP;BP;CC;BP;CC;BP;BP;BP;BP;CC;CC;BP;CC;CC;CC;BP;CC;CC;MF;CC;CC;MF;BP;CC;BP;BP;MF;BP;BP;BP;BP;CC;CC;CC;BP;CC;BP;BP;	extracellular exosome;glyceraldehyde-3-phosphate dehydrogenase (NAD+) (phosphorylating) activity;positive regulation of canonical NF-kappaB signal transduction;negative regulation of apoptotic process;protein stabilization;carbohydrate metabolic process;ribonucleoprotein complex;gluconeogenesis;response to cadmium ion;intracellular amino acid homeostasis;positive regulation of type I interferon p…	-	ko01230;ko01200;ko00010;ko01100;ko00710;ko01110	Biosynthesis of amino acids;Carbon metabolism;Glycolysis / Gluconeogenesis;Metabolic pathways;Carbon fixation by Calvin cycle;Biosynthesis of secondary metabolites	glyceraldehyde-3-phosphate dehydrogenase, cytosolic-like [Brassica napus]	PF02800.24	Glyceraldehyde 3-phosphate dehydrogenase, C-terminal domain	Glyceraldehyde-3-phosphate dehydrogenase, cytosolic OS=Sinapis alba OX=3728 GN=GAPC PE=2 SV=2	3GAGX	G	Belongs to the glyceraldehyde-3-phosphate dehydrogenase family	COG0057	Glyceraldehyde-3-phosphate dehydrogenase/erythrose-4-phosphate dehydrogenase	G	Carbohydrate transport and metabolism	KOG0657	[G]	Carbohydrate transport and metabolism;	Glyceraldehyde 3-phosphate dehydrogenase	-
BnaC04G0600000ZS	BnaC04G0600000ZS	2.77668	-1.0364	6.67024e-06	0.00169444	down	3.84831	4.13966	4.72164	8.94065	9.36028	6.05279	301	285	286	547	752	427	GO:0042343;GO:0102511;GO:0080081;GO:0043621;GO:0030245;GO:0010119;GO:0006952;GO:0005975;GO:0015923;GO:0051993;GO:0009651;GO:0009804;GO:0050224;GO:0009687;GO:0008422;GO:0097599;GO:0009506;GO:0051258;GO:0022626;GO:0102507;GO:0005777;GO:0009579;GO:0005794;GO:0009941;GO:0080119;GO:0019762;GO:0102799;GO:0009617;GO:0102514;GO:0019748;GO:0005507;GO:0016162;GO:0033302;GO:0009507;GO:0009536;GO:0002020;GO:…	BP;MF;MF;MF;BP;BP;BP;BP;MF;MF;BP;BP;MF;BP;MF;MF;CC;BP;CC;MF;CC;CC;CC;CC;BP;BP;MF;BP;MF;BP;MF;MF;BP;CC;CC;MF;BP;MF;MF;CC;BP;BP;BP;BP;CC;MF;CC;BP;BP;MF;CC;BP;MF;BP;MF;CC;CC;MF;MF;BP;BP;BP;MF;MF;BP;CC;MF;BP;MF;BP;BP;MF;MF;MF;CC;MF;BP;MF;MF;BP;CC;CC;BP;BP;BP;MF;MF;BP;MF;BP;MF;BP;BP;BP;MF;MF;BP;BP;BP;CC;CC;MF;CC;BP;CC;MF;MF;BP;BP;MF;BP;	indole glucosinolate metabolic process;obsolete pelargonidin 3-O-glucoside 7-O-glucosyltransferase (acyl-glucose dependent) activity;4-methylumbelliferyl-beta-D-glucopyranoside beta-glucosidase activity;obsolete protein self-association;cellulose catabolic process;regulation of stomatal movement;defense response;carbohydrate metabolic process;mannosidase activity;abscisic acid glucose ester beta-…	K01188	ko00500;ko00940;ko01100;ko00460;ko01110	Starch and sucrose metabolism;Phenylpropanoid biosynthesis;Metabolic pathways;Cyanoamino acid metabolism;Biosynthesis of secondary metabolites	beta-glucosidase 15-like isoform X2 [Brassica napus]	PF00232.22	Glycosyl hydrolase family 1	Beta-glucosidase 15 OS=Arabidopsis thaliana OX=3702 GN=BGLU15 PE=1 SV=1	3HSC5	G	Belongs to the glycosyl hydrolase 1 family	COG2723	Beta-glucosidase/6-phospho-beta-glucosidase/beta-galactosidase	G	Carbohydrate transport and metabolism	KOG0626	[G]	Carbohydrate transport and metabolism;	Beta-glucosidase, lactase phlorizinhydrolase, and related proteins	-
BnaC03G0123500ZS	BnaC03G0123500ZS	2.56107	-1.70077	6.74139e-06	0.0017022	down	2.99611	3.17224	2.05883	7.04605	11.3094	7.36332	46	43	25	84	176	101	-	-	-	-	-	-	uncharacterized protein LOC106387163 [Brassica napus]	-	-	-	3GM1E	S	expressed protein	-	-	-	-	-	-	-	-	-
BnaC09G0425100ZS	BnaC09G0425100ZS	0.8892	1.72245	6.87816e-06	0.00172634	up	1.44298	1.4563	1.47383	0.318449	0.370868	0.504611	84	75	67	15	23	27	GO:0070062;GO:0043123;GO:0010119;GO:0005759;GO:0030335;GO:0009651;GO:0009787;GO:0007178;GO:0032880;GO:0010628;GO:0009620;GO:0035970;GO:0044387;GO:1990439;GO:0005737;GO:0010811;GO:0045893;GO:0044423;GO:0017018;GO:0010634;GO:0010205;GO:0005777;GO:0090263;GO:0005794;GO:1900102;GO:0043280;GO:0030148;GO:0009408;GO:0032991;GO:0033137;GO:0051726;GO:0010030;GO:0070412;GO:0009788;GO:0031625;GO:0006470;GO:…	CC;BP;BP;CC;BP;BP;BP;BP;BP;BP;BP;BP;BP;MF;CC;BP;BP;CC;MF;BP;BP;CC;BP;CC;BP;BP;BP;BP;CC;BP;BP;BP;MF;BP;MF;BP;BP;BP;CC;BP;BP;BP;BP;BP;BP;BP;CC;BP;BP;BP;BP;BP;MF;BP;BP;BP;BP;BP;BP;MF;BP;BP;BP;BP;BP;CC;BP;BP;BP;BP;BP;CC;CC;BP;BP;BP;BP;BP;CC;CC;BP;BP;MF;BP;MF;MF;BP;BP;BP;BP;MF;BP;BP;BP;BP;BP;MF;BP;MF;MF;BP;CC;BP;CC;BP;BP;MF;CC;BP;BP;BP;CC;BP;MF;MF;BP;BP;CC;CC;BP;MF;CC;BP;BP;MF;	extracellular exosome;positive regulation of canonical NF-kappaB signal transduction;regulation of stomatal movement;mitochondrial matrix;positive regulation of cell migration;response to salt stress;regulation of abscisic acid-activated signaling pathway;cell surface receptor protein serine/threonine kinase signaling pathway;regulation of protein localization;positive regulation of gene expressi…	K14497	ko04075;ko04016	Plant hormone signal transduction;MAPK signaling pathway - plant	probable protein phosphatase 2C 78 [Brassica napus]	PF00481.25	Protein phosphatase 2C	Probable protein phosphatase 2C 78 OS=Arabidopsis thaliana OX=3702 GN=SAG113 PE=1 SV=1	3HTBS	T	Sigma factor PP2C-like phosphatases	COG0631	Serine/threonine protein phosphatase PrpC	T	Signal transduction mechanisms	KOG0698	[T]	Signal transduction mechanisms;	Serine/threonine protein phosphatase	-
BnaA06G0050900ZS	BnaA06G0050900ZS	2.13807	0.855153	7.22019e-06	0.0018014	nonsig	4.78972	4.39086	4.91967	2.31671	2.51393	2.37769	551	444	438	209	298	247	GO:0010007;GO:0016887;GO:0009842;GO:0009505;GO:0009534;GO:0015979;GO:0009507;GO:0009536;GO:0016851;GO:0005524;GO:0015995;GO:0005829;GO:0009570;GO:0005576;GO:0030494;	CC;MF;CC;CC;CC;BP;CC;CC;MF;MF;BP;CC;CC;CC;BP;	magnesium chelatase complex;ATP hydrolysis activity;cyanelle;plant-type cell wall;chloroplast thylakoid;photosynthesis;chloroplast;plastid;magnesium chelatase activity;ATP binding;chlorophyll biosynthetic process;cytosol;chloroplast stroma;extracellular region;bacteriochlorophyll biosynthetic process;	K03404	ko00860;ko01110;ko01100	Porphyrin metabolism;Biosynthesis of secondary metabolites;Metabolic pathways	magnesium-chelatase subunit ChlD, chloroplastic [Brassica rapa]	PF17863.5	AAA lid domain	Magnesium-chelatase subunit ChlD, chloroplastic OS=Arabidopsis thaliana OX=3702 GN=CHLD PE=1 SV=3	3HN58	Z	Involved in chlorophyll biosynthesis. Catalyzes the insertion of magnesium ion into protoporphyrin IX to yield Mg- protoporphyrin IX	COG1240	vWFA (von Willebrand factor type A) domain of Mg and Co chelatases	H	Coenzyme transport and metabolism	-	-	-	-	-
BnaA09G0110600ZS	BnaA09G0110600ZS	2.51349	-1.26752	7.39932e-06	0.00183516	down	2.53562	3.32821	3.5443	7.53284	8.44763	5.18233	100	115	108	232	341	184	GO:0008361;GO:0043621;GO:0048573;GO:0009723;GO:0010455;GO:0006952;GO:0009413;GO:0070301;GO:0012505;GO:0009825;GO:0009651;GO:0071456;GO:0001666;GO:0009739;GO:0000976;GO:1900056;GO:0060966;GO:0010628;GO:0090058;GO:0048317;GO:0009620;GO:0031155;GO:0010120;GO:0048731;GO:0005737;GO:0045893;GO:0005992;GO:0010228;GO:0002230;GO:0009753;GO:1902890;GO:0005516;GO:1903648;GO:0003713;GO:0009835;GO:0090602;GO:…	BP;MF;BP;BP;BP;BP;BP;BP;CC;BP;BP;BP;BP;BP;MF;BP;BP;BP;BP;BP;BP;BP;BP;BP;CC;BP;BP;BP;BP;BP;BP;MF;BP;MF;BP;BP;BP;MF;BP;MF;MF;BP;BP;BP;BP;BP;BP;BP;CC;BP;BP;BP;BP;CC;BP;BP;BP;MF;BP;BP;BP;BP;BP;BP;BP;BP;CC;BP;BP;MF;BP;MF;BP;BP;BP;BP;BP;BP;BP;CC;BP;BP;BP;BP;BP;BP;BP;BP;CC;BP;BP;BP;BP;BP;BP;BP;BP;BP;BP;BP;BP;BP;CC;BP;BP;BP;BP;BP;BP;BP;BP;BP;BP;BP;CC;BP;BP;BP;BP;MF;BP;BP;BP;BP;BP;BP;BP;BP;BP;BP;BP;BP;BP;…	regulation of cell size;obsolete protein self-association;photoperiodism, flowering;response to ethylene;positive regulation of cell fate commitment;defense response;response to flooding;cellular response to hydrogen peroxide;endomembrane system;multidimensional cell growth;response to salt stress;cellular response to hypoxia;response to hypoxia;response to gibberellin;transcription cis-regulator…	-	-	-	NAC domain-containing protein 6-like [Brassica napus]	PF02365.19	No apical meristem (NAM) protein	NAC domain-containing protein 6 OS=Glycine max OX=3847 GN=NAC6 PE=2 SV=1	3HSA6	K	transcription factor	-	-	-	-	-	-	-	-	NAC
BnaC07G0099100ZS	BnaC07G0099100ZS	3.01913	-2.35859	7.54556e-06	0.00186043	down	3.10453	5.16967	1.65551	8.62911	21.1102	18.8259	192	280	79	417	1338	1047	GO:0045490;GO:0000272;GO:0098552;GO:0009536;GO:0046872;GO:0030570;GO:0042547;GO:0005739;GO:0005886;GO:0009664;GO:0098542;GO:0005829;GO:0071555;GO:0005576;GO:0070051;GO:0009624;	BP;BP;CC;CC;MF;MF;BP;CC;CC;BP;BP;CC;BP;CC;MF;BP;	pectin catabolic process;polysaccharide catabolic process;side of membrane;plastid;metal ion binding;pectate lyase activity;cell wall modification involved in multidimensional cell growth;mitochondrion;plasma membrane;plant-type cell wall organization;defense response to other organism;cytosol;cell wall organization;extracellular region;fibrinogen binding;response to nematode;	K01728	ko01100;ko00040	Metabolic pathways;Pentose and glucuronate interconversions	probable pectate lyase 10 [Brassica napus]	PF00544.23	Pectate lyase	Probable pectate lyase 10 OS=Arabidopsis thaliana OX=3702 GN=At3g24670 PE=2 SV=2	3HZ52	G	Pectate lyase	COG3866	Pectate lyase	G	Carbohydrate transport and metabolism	-	-	-	-	-
BnaC03G0081000ZS	BnaC03G0081000ZS	2.62093	-1.28471	7.99354e-06	0.00195935	down	3.08614	3.0031	4.16161	7.93975	8.59709	6.48001	49	42	51	99	140	93	GO:0070483;GO:0005506;GO:0071456;GO:0005634;GO:0018171;GO:0017172;GO:0005737;	BP;MF;BP;CC;BP;MF;CC;	detection of hypoxia;iron ion binding;cellular response to hypoxia;nucleus;peptidyl-cysteine oxidation;cysteine dioxygenase activity;cytoplasm;	K23953	ko01100;ko00430	Metabolic pathways;Taurine and hypotaurine metabolism	plant cysteine oxidase 3 isoform X2 [Brassica rapa]	PF07847.16	PCO_ADO	Plant cysteine oxidase 3 OS=Arabidopsis thaliana OX=3702 GN=PCO3 PE=1 SV=1	3HRRG	S	ALG-2 interacting protein	-	-	-	-	KOG4281	[S]	Function unknown;	Uncharacterized conserved protein	-
BnaC07G0183200ZS	BnaC07G0183200ZS	2.49891	-1.37865	8.28569e-06	0.00201915	down	2.58816	3.79453	2.44417	6.97416	8.03601	6.64032	116	149	85	244	370	268	GO:0009736;GO:0010540;GO:0071456;GO:0010286;GO:0016567;GO:0005634;GO:0010541;GO:0009506;	BP;BP;BP;BP;BP;CC;BP;CC;	cytokinin-activated signaling pathway;basipetal auxin transport;cellular response to hypoxia;heat acclimation;protein ubiquitination;nucleus;acropetal auxin transport;plasmodesma;	-	-	-	F-box protein AUF2 [Brassica napus]	PF12937.11	F-box-like	F-box protein AUF2 OS=Arabidopsis thaliana OX=3702 GN=AUF2 PE=2 SV=1	3HQ7S	S	F-box family	-	-	-	-	-	-	-	-	-
BnaC03G0454200ZS	BnaC03G0454200ZS	4.10844	-1.33855	8.78081e-06	0.00212149	down	10.4253	13.0067	8.30258	23.1867	30.5788	22.1637	507	556	312	882	1528	972	GO:0032047;GO:0009507;GO:0005739;GO:0009409;GO:0016491;GO:0106292;GO:0008199;GO:0009535;GO:0070469;GO:0046872;GO:0102721;GO:0046862;GO:0045333;GO:0009657;GO:0031930;GO:0009579;GO:0010230;GO:0016117;GO:0005743;GO:0009916;	CC;CC;CC;BP;MF;MF;MF;CC;CC;MF;MF;CC;BP;BP;BP;CC;BP;BP;CC;MF;	mitosome;chloroplast;mitochondrion;response to cold;oxidoreductase activity;superoxide-generating NADPH oxidase activity;ferric iron binding;chloroplast thylakoid membrane;obsolete respirasome;metal ion binding;ubiquinol:oxygen oxidoreductase activity;chromoplast membrane;cellular respiration;plastid organization;mitochondria-nucleus signaling pathway;thylakoid;alternative respiration;carotenoid …	K17893	-	-	ubiquinol oxidase 1a, mitochondrial [Brassica napus]	PF01786.21	Alternative oxidase	Ubiquinol oxidase 1a, mitochondrial OS=Arabidopsis thaliana OX=3702 GN=AOX1A PE=1 SV=2	3HMKI	C	Belongs to the alternative oxidase family	-	-	-	-	-	-	-	-	-
BnaC03G0253400ZS	BnaC03G0253400ZS	1.06251	-1.47209	8.81035e-06	0.00212149	down	0.509942	0.521387	0.932279	1.52712	2.09304	1.39219	51	46	72	119	213	125	GO:0004665;GO:0051287;GO:0070403;GO:0008977;GO:0009507;GO:0047964;GO:0033730;GO:0006571;GO:0030267;GO:0005829;GO:0016618;	MF;MF;MF;MF;CC;MF;MF;BP;MF;CC;MF;	prephenate dehydrogenase (NADP+) activity;NAD binding;NAD+ binding;prephenate dehydrogenase (NAD+) activity;chloroplast;glyoxylate reductase (NADH) activity;arogenate dehydrogenase (NADP+) activity;tyrosine biosynthetic process;glyoxylate reductase (NADPH) activity;cytosol;hydroxypyruvate reductase [NAD(P)H] activity;	K15227	ko01100;ko01110;ko01230;ko00400	Metabolic pathways;Biosynthesis of secondary metabolites;Biosynthesis of amino acids;Phenylalanine, tyrosine and tryptophan biosynthesis	arogenate dehydrogenase 1, chloroplastic-like [Brassica napus]	PF03807.21	NADP oxidoreductase coenzyme F420-dependent	Arogenate dehydrogenase 1, chloroplastic OS=Arabidopsis thaliana OX=3702 GN=TYRAAT1 PE=1 SV=1	3HQJM	E	Arogenate dehydrogenase	COG0287	Prephenate dehydrogenase	E	Amino acid transport and metabolism	KOG2380	[E]	Amino acid transport and metabolism;	Prephenate dehydrogenase (NADP+)	-
BnaA07G0232900ZS	BnaA07G0232900ZS	1.09155	1.86139	8.85747e-06	0.00212149	up	1.88653	1.92382	2.25544	0.441107	0.57964	0.497435	55	49	51	10	18	13	GO:0009579;GO:0003729;GO:0009534;GO:0015979;GO:0009654;GO:0009535;GO:0009507;GO:0005739;GO:0010270;	CC;MF;CC;BP;CC;CC;CC;CC;BP;	thylakoid;mRNA binding;chloroplast thylakoid;photosynthesis;photosystem II oxygen evolving complex;chloroplast thylakoid membrane;chloroplast;mitochondrion;photosystem II oxygen evolving complex assembly;	-	ko00195	Photosynthesis	photosystem II 10 kDa polypeptide, chloroplastic [Brassica napus]	PF04725.16	Photosystem II 10 kDa polypeptide PsbR	Photosystem II 10 kDa polypeptide, chloroplastic OS=Brassica campestris OX=3711 GN=PSBR PE=2 SV=1	3HV2T	S	photosystem II	-	-	-	-	-	-	-	-	-
BnaC04G0607300ZS	BnaC04G0607300ZS	1.3733	-1.25134	8.98872e-06	0.00214069	down	0.919814	0.973681	1.22735	2.31345	2.48561	2.10133	48	45	49	94	132	98	GO:0019904;GO:0006617;GO:0043021;GO:0016887;GO:0016607;GO:0048500;GO:0060090;GO:0009507;GO:0005634;GO:0006614;GO:0030851;GO:0030942;GO:1990904;GO:0003924;GO:0003723;GO:0006612;GO:0005525;GO:0009535;GO:0005047;GO:0009898;GO:0005786;GO:0070208;GO:0045047;GO:0042803;GO:0005886;GO:0005096;GO:0009570;GO:0005737;GO:0019003;GO:0006605;GO:0009274;GO:0046872;GO:0006616;GO:0015968;GO:0030593;GO:0005829;GO:…	MF;BP;MF;MF;CC;CC;MF;CC;CC;BP;BP;MF;CC;MF;MF;BP;MF;CC;MF;CC;CC;BP;BP;MF;CC;MF;CC;CC;MF;BP;CC;MF;BP;BP;BP;CC;CC;CC;BP;MF;CC;	protein domain specific binding;SRP-dependent cotranslational protein targeting to membrane, signal sequence recognition;ribonucleoprotein complex binding;ATP hydrolysis activity;nuclear speck;signal recognition particle;molecular adaptor activity;chloroplast;nucleus;SRP-dependent cotranslational protein targeting to membrane;granulocyte differentiation;endoplasmic reticulum signal peptide bindin…	K03110	ko03060	Protein export	cell division protein FtsY homolog, chloroplastic isoform X1 [Brassica napus]	PF00448.26	SRP54-type protein, GTPase domain	Cell division protein FtsY homolog, chloroplastic OS=Arabidopsis thaliana OX=3702 GN=CPFTSY PE=1 SV=2	3HQD4	U	SRP54-type protein, GTPase domain	COG0552	Signal recognition particle GTPase FtsY	U	Intracellular trafficking, secretion, and vesicular transport	KOG0780	[U]	Intracellular trafficking, secretion, and vesicular transport;	Signal recognition particle, subunit Srp54	-
BnaC08G0189500ZS	BnaC08G0189500ZS	3.37953	-1.63315	9.05742e-06	0.00214487	down	3.43306	4.93178	8.92081	15.9518	13.5083	18.8051	227	286	455	824	917	1120	GO:0070062;GO:0043621;GO:0009758;GO:0098793;GO:0043066;GO:0055056;GO:0005536;GO:0005975;GO:0022857;GO:0012505;GO:0007611;GO:0009651;GO:0030667;GO:0030315;GO:0071456;GO:0001666;GO:0070343;GO:0010021;GO:0071548;GO:0070821;GO:0055085;GO:0043204;GO:1904016;GO:0005737;GO:0030140;GO:0016323;GO:1990350;GO:0051119;GO:0005901;GO:0015145;GO:0030496;GO:0015284;GO:0005615;GO:0005794;GO:0009941;GO:0000324;GO:…	CC;MF;BP;CC;BP;MF;MF;BP;MF;CC;BP;BP;CC;CC;BP;BP;BP;BP;BP;CC;BP;CC;BP;CC;CC;CC;CC;MF;CC;MF;CC;MF;CC;CC;CC;CC;MF;CC;BP;BP;CC;BP;BP;BP;CC;BP;BP;CC;CC;BP;CC;CC;BP;BP;BP;CC;MF;CC;CC;CC;CC;BP;BP;CC;BP;CC;CC;CC;MF;BP;BP;MF;CC;BP;MF;BP;CC;MF;BP;CC;CC;MF;CC;BP;CC;CC;BP;MF;MF;BP;MF;BP;CC;BP;BP;CC;BP;BP;CC;CC;MF;MF;BP;CC;CC;BP;CC;MF;BP;BP;CC;BP;CC;BP;MF;CC;BP;BP;CC;BP;MF;BP;BP;CC;BP;BP;BP;BP;MF;CC;CC;BP;BP;…	extracellular exosome;obsolete protein self-association;carbohydrate utilization;presynapse;negative regulation of apoptotic process;D-glucose transmembrane transporter activity;D-glucose binding;carbohydrate metabolic process;transmembrane transporter activity;endomembrane system;learning or memory;response to salt stress;secretory granule membrane;T-tubule;cellular response to hypoxia;response …	K03444	-	-	sugar transporter ESL1 [Brassica napus]	PF00083.28	Sugar (and other) transporter	Sugar transporter ESL1 OS=Arabidopsis thaliana OX=3702 GN=ESL1 PE=1 SV=1	3HQWC	U	sugar transporter	COG2814	Predicted arabinose efflux permease AraJ, MFS family	G	Carbohydrate transport and metabolism	KOG0254	[R]	General function prediction only;	Predicted transporter (major facilitator superfamily)	-
BnaA05G0013000ZS	BnaA05G0013000ZS	1.2669	-3.09992	9.1734e-06	0.00216013	down	0.152335	0.54869	0.647887	4.47861	1.03823	4.91361	7	22	23	160	49	202	-	-	-	-	-	-	serine/arginine repetitive matrix protein 1-like [Brassica napus]	-	-	-	3HUPM	S	Vegetative cell wall protein	-	-	-	-	-	-	-	-	-
BnaC08G0384900ZS	BnaC08G0384900ZS	1.21629	1.37837	9.54754e-06	0.00223567	up	2.22419	1.64644	2.47432	0.877515	0.633635	0.730387	147	96	127	46	43	44	GO:0007507;GO:0070062;GO:0050440;GO:0005634;GO:0014823;GO:0031288;GO:0005975;GO:0005739;GO:0005759;GO:0006635;GO:0099503;GO:0034214;GO:0006907;GO:0004108;GO:0003723;GO:0006897;GO:0030435;GO:0042803;GO:0005886;GO:0006084;GO:0005737;GO:0019954;GO:0070404;GO:0009506;GO:0042802;GO:0006097;GO:0046912;GO:0006107;GO:0019629;GO:0005829;GO:0006099;GO:0005777;GO:0006101;GO:0050766;GO:0009514;GO:0019679;GO:…	BP;CC;MF;CC;BP;BP;BP;CC;CC;BP;CC;BP;BP;MF;MF;BP;BP;MF;CC;BP;CC;BP;MF;CC;MF;BP;MF;BP;BP;CC;BP;CC;BP;BP;CC;BP;CC;BP;MF;BP;	heart development;extracellular exosome;2-methylcitrate synthase activity;nucleus;response to activity;sorocarp morphogenesis;carbohydrate metabolic process;mitochondrion;mitochondrial matrix;fatty acid beta-oxidation;secretory vesicle;protein hexamerization;pinocytosis;citrate (Si)-synthase activity;RNA binding;endocytosis;sporulation resulting in formation of a cellular spore;protein homodimeri…	K01647	ko00020;ko01100;ko00630;ko01200;ko01110;ko01210;ko01230	Citrate cycle (TCA cycle);Metabolic pathways;Glyoxylate and dicarboxylate metabolism;Carbon metabolism;Biosynthesis of secondary metabolites;2-Oxocarboxylic acid metabolism;Biosynthesis of amino acids	citrate synthase 2, peroxisomal [Brassica napus]	PF00285.25	Citrate synthase, C-terminal domain	Citrate synthase 2, peroxisomal OS=Arabidopsis thaliana OX=3702 GN=CSY2 PE=2 SV=1	3HS55	C	citrate synthase	COG0372	Citrate synthase	C	Energy production and conversion	KOG2617	[C]	Energy production and conversion;	Citrate synthase	-
BnaA05G0058900ZS	BnaA05G0058900ZS	3.59901	-1.30306	1.03439e-05	0.00240869	down	5.21236	7.04498	10.1938	14.7359	18.1708	17.7577	156	185	236	344	558	478	GO:0004864;GO:0005634;GO:0009867;GO:0009738;GO:0090351;GO:0009536;GO:0006952;GO:0009409;GO:0009789;GO:0009651;GO:0010427;GO:0006970;GO:0009705;GO:0042803;GO:0005886;GO:0005737;GO:0080163;GO:1905183;GO:0042802;GO:1902584;GO:0005829;GO:0009737;GO:0009845;GO:0038023;GO:0062049;GO:0009414;GO:0044389;	MF;CC;BP;BP;BP;CC;BP;BP;BP;BP;MF;BP;CC;MF;CC;CC;BP;BP;MF;BP;CC;BP;BP;MF;CC;BP;MF;	protein phosphatase inhibitor activity;nucleus;jasmonic acid mediated signaling pathway;abscisic acid-activated signaling pathway;seedling development;plastid;defense response;response to cold;positive regulation of abscisic acid-activated signaling pathway;response to salt stress;abscisic acid binding;response to osmotic stress;plant-type vacuole membrane;protein homodimerization activity;plasma…	K14496	ko04016;ko04075	MAPK signaling pathway - plant;Plant hormone signal transduction	abscisic acid receptor PYL6 [Brassica napus]	PF10604.13	Polyketide cyclase / dehydrase and lipid transport	Abscisic acid receptor PYL6 OS=Arabidopsis thaliana OX=3702 GN=PYL6 PE=1 SV=1	3HW4W	S	Abscisic acid receptor	-	-	-	-	-	-	-	-	-
BnaA05G0488500ZS	BnaA05G0488500ZS	2.63864	-1.41634	1.10362e-05	0.00255571	down	2.38284	2.84959	4.8342	7.38318	9.15535	8.01734	54	57	84	130	211	163	GO:0007585;GO:0006979;GO:0042775;GO:0009060;GO:0005747;GO:0032981;GO:0050897;GO:0005739;GO:0005743;GO:0042776;GO:0005829;GO:0008137;	BP;BP;BP;BP;CC;BP;MF;CC;CC;BP;CC;MF;	respiratory gaseous exchange by respiratory system;response to oxidative stress;mitochondrial ATP synthesis coupled electron transport;aerobic respiration;obsolete mitochondrial respiratory chain complex I;mitochondrial respiratory chain complex I assembly;cobalt ion binding;mitochondrion;mitochondrial inner membrane;proton motive force-driven mitochondrial ATP synthesis;cytosol;NADH dehydrogenas…	K11352	ko01100;ko00190	Metabolic pathways;Oxidative phosphorylation	probable NADH dehydrogenase [ubiquinone] 1 alpha subcomplex subunit 12 [Brassica napus]	PF05071.20	NADH ubiquinone oxidoreductase subunit NDUFA12	Probable NADH dehydrogenase [ubiquinone] 1 alpha subcomplex subunit 12 OS=Arabidopsis thaliana OX=3702 GN=At3g03100 PE=1 SV=1	3HTTD	C	Accessory subunit of the mitochondrial membrane respiratory chain NADH dehydrogenase (Complex I), that is believed not to be involved in catalysis. Complex I functions in the transfer of electrons from NADH to the respiratory chain. The immediate electron acceptor for the enzyme is believed to be ubiquinone	COG3761	NADH:ubiquinone oxidoreductase NDUFA12 subunit (Leigh syndrome)	C	Energy production and conversion	KOG3381	[S]	Function unknown;	Uncharacterized conserved protein	-
BnaA01G0415300ZS	BnaA01G0415300ZS	4.42026	-0.854806	1.20361e-05	0.00277193	nonsig	14.1605	15.2849	18.0504	24.1777	27.9479	27.1033	726	689	716	970	1473	1254	GO:0099402;GO:0008295;GO:0005634;GO:0006596;GO:0009446;GO:0005737;GO:0046982;GO:1905724;GO:0019079;GO:0042802;GO:0050829;GO:0019810;GO:0046499;GO:0005829;GO:0006597;GO:1901307;GO:1902494;GO:0004014;GO:0015940;GO:0046500;GO:0006595;	BP;BP;CC;BP;BP;CC;MF;BP;BP;MF;BP;MF;BP;CC;BP;BP;CC;MF;BP;BP;BP;	plant organ development;spermidine biosynthetic process;nucleus;polyamine biosynthetic process;putrescine biosynthetic process;cytoplasm;protein heterodimerization activity;positive regulation of trypanothione biosynthetic process;viral genome replication;identical protein binding;defense response to Gram-negative bacterium;putrescine binding;S-adenosylmethioninamine metabolic process;cytosol;spe…	K01611	ko00330;ko01100;ko00270	Arginine and proline metabolism;Metabolic pathways;Cysteine and methionine metabolism	S-adenosylmethionine decarboxylase proenzyme 3-like isoform X2 [Brassica napus]	PF01536.20	Adenosylmethionine decarboxylase	S-adenosylmethionine decarboxylase proenzyme 3 OS=Brassica juncea OX=3707 GN=SAMDC3 PE=2 SV=1	3HXFG	T	s-adenosylmethionine decarboxylase	-	-	-	-	KOG0788	[T]	Signal transduction mechanisms;	S-adenosylmethionine decarboxylase	-
Bnascaffold0313G0000300ZS	Bnascaffold0313G0000300ZS	5.36529	-1.48827	1.25872e-05	0.00288302	down	20.3667	24.137	33.041	59.7406	48.0384	89.0762	837	873	1051	1923	2032	3306	GO:0070062;GO:0051592;GO:0030424;GO:0001938;GO:0060090;GO:0043066;GO:0042335;GO:0006281;GO:0007165;GO:0070301;GO:0031648;GO:0031432;GO:0030315;GO:0001533;GO:2000310;GO:1990092;GO:0034605;GO:0005737;GO:0045893;GO:0009410;GO:0008340;GO:0006880;GO:0071277;GO:0032007;GO:0005794;GO:0009953;GO:0051898;GO:0043280;GO:0031410;GO:1990091;GO:0051924;GO:0007520;GO:0032991;GO:0010649;GO:0065003;GO:1901077;GO:…	CC;BP;CC;BP;MF;BP;BP;BP;BP;BP;BP;MF;CC;CC;BP;BP;BP;CC;BP;BP;BP;BP;BP;BP;CC;BP;BP;BP;CC;BP;BP;BP;CC;BP;BP;BP;BP;BP;BP;BP;BP;CC;BP;BP;BP;BP;BP;BP;BP;CC;CC;MF;CC;MF;BP;BP;BP;MF;BP;BP;BP;BP;CC;CC;BP;BP;BP;CC;CC;BP;BP;BP;CC;MF;CC;BP;BP;MF;BP;BP;MF;CC;BP;BP;BP;BP;BP;MF;CC;MF;BP;MF;BP;CC;BP;BP;MF;BP;CC;CC;CC;BP;BP;MF;BP;BP;BP;BP;BP;MF;MF;CC;CC;BP;MF;CC;BP;MF;BP;BP;BP;BP;MF;MF;CC;BP;BP;CC;CC;BP;MF;CC;BP;…	extracellular exosome;response to calcium ion;axon;positive regulation of endothelial cell proliferation;molecular adaptor activity;negative regulation of apoptotic process;cuticle development;DNA repair;signal transduction;cellular response to hydrogen peroxide;protein destabilization;titin binding;T-tubule;cornified envelope;regulation of NMDA receptor activity;calcium-dependent self proteolysi…	K13448	ko04626	Plant-pathogen interaction	probable calcium-binding protein CML49 [Brassica napus]	PF13499.10	EF-hand domain pair	Probable calcium-binding protein CML49 OS=Arabidopsis thaliana OX=3702 GN=CML49 PE=2 SV=1	3HRH5	T	calcium-binding	-	-	-	-	KOG0037	[T]	Signal transduction mechanisms;	Ca2+-binding protein, EF-Hand protein superfamily	-
BnaC08G0304700ZS	BnaC08G0304700ZS	6.3437	-1.00527	1.27754e-05	0.00291022	down	58.507	51.5847	68.5736	88.7539	120.993	119.393	1335	1035	1211	1586	2840	2459	GO:0050826;GO:0009723;GO:0009415;GO:0042335;GO:0009631;GO:0006952;GO:0071369;GO:0048825;GO:0009651;GO:0071456;GO:0001666;GO:0042631;GO:1900036;GO:0000976;GO:0010628;GO:0009620;GO:0034605;GO:0005737;GO:0009864;GO:0045893;GO:0009753;GO:0010143;GO:0010166;GO:0008219;GO:1900030;GO:0048510;GO:0009408;GO:0009617;GO:0009735;GO:0009409;GO:0045595;GO:0050832;GO:1990837;GO:0009733;GO:0010087;GO:0060862;GO:…	BP;BP;BP;BP;BP;BP;BP;BP;BP;BP;BP;BP;BP;MF;BP;BP;BP;CC;BP;BP;BP;BP;BP;BP;BP;BP;BP;BP;BP;BP;BP;BP;MF;BP;BP;BP;BP;MF;MF;BP;BP;BP;BP;BP;CC;BP;BP;BP;BP;BP;BP;BP;BP;MF;BP;BP;BP;BP;BP;BP;BP;BP;BP;BP;BP;CC;BP;BP;BP;BP;BP;BP;BP;BP;MF;CC;BP;BP;BP;BP;BP;MF;BP;BP;BP;BP;BP;BP;BP;	response to freezing;response to ethylene;response to water;cuticle development;cold acclimation;defense response;cellular response to ethylene stimulus;cotyledon development;response to salt stress;cellular response to hypoxia;response to hypoxia;cellular response to water deprivation;positive regulation of cellular response to heat;transcription cis-regulatory region binding;positive regulation…	K09286	-	-	ethylene-responsive transcription factor ERF011 [Brassica napus]	PF00847.24	AP2 domain	Ethylene-responsive transcription factor ERF011 OS=Arabidopsis thaliana OX=3702 GN=ERF011 PE=2 SV=1	3HZC4	K	Transcription factor	-	-	-	-	-	-	-	-	AP2/ERF-ERF
BnaA10G0015100ZS	BnaA10G0015100ZS	1.00359	-2.543	1.29648e-05	0.00293741	down	0.239144	0.153804	0.734316	2.53272	1.47511	1.99625	9	5	21	71	54	65	GO:0070062;GO:0019904;GO:0005507;GO:0005634;GO:0009507;GO:0000325;GO:0006952;GO:0048046;GO:0006572;GO:0005739;GO:0009409;GO:0018900;GO:0003714;GO:0014070;GO:1990748;GO:0046686;GO:1900384;GO:0006979;GO:0071456;GO:0009751;GO:1902000;GO:0004601;GO:0033197;GO:0006808;GO:0010043;GO:0016034;GO:0006559;GO:0009407;GO:0050897;GO:2001147;GO:0005886;GO:0009705;GO:1901149;GO:0042803;GO:0042128;GO:0009570;GO:…	CC;MF;MF;CC;CC;CC;BP;CC;BP;CC;BP;BP;MF;BP;BP;BP;BP;BP;BP;BP;BP;MF;BP;BP;BP;MF;BP;BP;MF;MF;CC;CC;MF;MF;BP;CC;BP;BP;CC;MF;CC;CC;BP;BP;MF;BP;BP;BP;BP;MF;MF;BP;BP;BP;BP;MF;CC;CC;BP;MF;BP;CC;MF;CC;BP;CC;CC;CC;CC;MF;MF;MF;MF;BP;CC;BP;MF;CC;BP;	extracellular exosome;protein domain specific binding;copper ion binding;nucleus;chloroplast;plant-type vacuole;defense response;apoplast;tyrosine catabolic process;mitochondrion;response to cold;dichloromethane metabolic process;transcription corepressor activity;response to organic cyclic compound;cellular detoxification;response to cadmium ion;regulation of flavonol biosynthetic process;respon…	K00799	ko01100;ko00480	Metabolic pathways;Glutathione metabolism	glutathione S-transferase F4 isoform X1 [Brassica napus]	PF02798.24	Glutathione S-transferase, N-terminal domain	Glutathione S-transferase F4 OS=Arabidopsis thaliana OX=3702 GN=GSTF4 PE=2 SV=1	3HVJ3	O	Glutathione S-transferase	COG0625	Glutathione S-transferase	O	Posttranslational modification, protein turnover, chaperones	KOG0867	[O]	Posttranslational modification, protein turnover, chaperones;	Glutathione S-transferase	-
BnaA09G0411800ZS	BnaA09G0411800ZS	3.202	1.36902	1.41258e-05	0.003175	up	16.6085	12.5891	11.7824	6.77913	4.63018	3.53321	1077	718	591	344	309	207	GO:0046982;GO:0005634;GO:2000693;GO:0003677;GO:0003700;GO:0045893;GO:0045735;	MF;CC;BP;MF;MF;BP;MF;	protein heterodimerization activity;nucleus;positive regulation of seed maturation;DNA binding;DNA-binding transcription factor activity;positive regulation of DNA-templated transcription;nutrient reservoir activity;	-	-	-	uncharacterized protein LOC106362447 [Brassica napus]	-	-	Basic leucine zipper 25 OS=Arabidopsis thaliana OX=3702 GN=BZIP25 PE=1 SV=1	KOG0987	L	G-quadruplex DNA unwinding	-	-	-	-	-	-	-	-	-
BnaC03G0068200ZS	BnaC03G0068200ZS	0.71001	-2.43506	1.4165e-05	0.003175	down	0.147572	0.233583	0.326094	1.88675	0.870051	0.890691	7	10	12	68	42	37	GO:0004842;GO:0016567;GO:0009507;GO:0070696;	MF;BP;CC;MF;	ubiquitin-protein transferase activity;protein ubiquitination;chloroplast;transmembrane receptor protein serine/threonine kinase binding;	-	-	-	U-box domain-containing protein 2 [Brassica napus]	PF00514.27	Armadillo/beta-catenin-like repeat	U-box domain-containing protein 2 OS=Arabidopsis thaliana OX=3702 GN=PUB2 PE=2 SV=1	3HNU9	S	U-box domain-containing protein	-	-	-	-	KOG0166	[U]	Intracellular trafficking, secretion, and vesicular transport;	Karyopherin (importin) alpha	-
BnaC03G0413600ZS	BnaC03G0413600ZS	1.47415	-2.17115	1.46011e-05	0.00325535	down	0.783176	1.05294	0.54518	4.97655	3.35833	2.1208	18	22	10	90	80	44	GO:0008380;GO:0003723;GO:0001530;GO:0005634;GO:0046872;GO:0006396;GO:0006397;GO:0005654;	BP;MF;MF;CC;MF;BP;BP;CC;	RNA splicing;RNA binding;lipopolysaccharide binding;nucleus;metal ion binding;RNA processing;mRNA processing;nucleoplasm;	-	-	-	transcription initiation factor TFIID subunit 15 [Brassica napus]	PF00641.22	Zn-finger in Ran binding protein and others	Zinc finger Ran-binding domain-containing protein 2 OS=Rattus norvegicus OX=10116 GN=Zranb2 PE=1 SV=2	3I0A2	S	zinc finger (Ran-binding) family protein	-	-	-	-	KOG4198	[R]	General function prediction only;	RNA-binding Ran Zn-finger protein and related proteins	-
BnaA08G0059800ZS	BnaA08G0059800ZS	2.0408	-1.81233	1.48174e-05	0.00327946	down	2.07714	1.48905	1.59369	8.26948	6.30868	2.6063	190	120	113	592	594	216	GO:0005507;GO:1901001;GO:0010023;GO:0010106;GO:0006878;GO:0009536;GO:0016218;GO:0000329;GO:0048315;GO:0000325;GO:0006952;GO:0048046;GO:0009615;GO:0048226;GO:0008447;GO:0006811;GO:0006826;GO:0034755;GO:0042597;GO:0016491;GO:0019854;GO:0009651;GO:0098706;GO:0006979;GO:0061841;GO:0030435;GO:0140783;GO:0009813;GO:1990641;GO:0009986;GO:0046148;GO:0005886;GO:1901684;GO:0042542;GO:0062040;GO:0080022;GO:…	MF;BP;BP;BP;BP;CC;MF;CC;BP;CC;BP;CC;BP;CC;MF;BP;BP;BP;CC;MF;BP;BP;BP;BP;CC;BP;BP;BP;BP;CC;BP;CC;BP;BP;CC;BP;BP;BP;BP;BP;MF;BP;CC;BP;MF;MF;CC;CC;BP;CC;BP;MF;MF;CC;CC;CC;BP;CC;BP;BP;BP;BP;BP;CC;BP;	copper ion binding;negative regulation of response to salt stress;proanthocyanidin biosynthetic process;cellular response to iron ion starvation;intracellular copper ion homeostasis;plastid;polyketide synthase activity;fungal-type vacuole membrane;conidium formation;plant-type vacuole;defense response;apoplast;response to virus;Casparian strip;L-ascorbate oxidase activity;monoatomic ion transport…	-	-	-	L-ascorbate oxidase homolog [Brassica napus]	PF00394.26	Multicopper oxidase	L-ascorbate oxidase homolog OS=Brassica napus OX=3708 GN=Bp10 PE=2 SV=1	3HYU7	Q	Multicopper oxidase	COG2132	Multicopper oxidase with three cupredoxin domains (includes cell division protein FtsP and spore coat protein CotA)	DPM	-	KOG1263	[Q]	Secondary metabolites biosynthesis, transport and catabolism;	Multicopper oxidases	-
BnaC01G0140300ZS	BnaC01G0140300ZS	1.30843	-1.93006	1.48657e-05	0.00327946	down	1.12777	0.489575	0.570006	3.07968	3.23257	1.68624	58	23	23	124	171	78	GO:0034756;GO:0050826;GO:0006952;GO:0046686;GO:0009651;GO:0003682;GO:0000976;GO:0010628;GO:0048317;GO:0005737;GO:0045893;GO:0009753;GO:2000122;GO:0031347;GO:0010037;GO:0010162;GO:0005615;GO:0009827;GO:0005794;GO:0031542;GO:1900425;GO:0042538;GO:2000038;GO:0009409;GO:0010374;GO:0008240;GO:0009897;GO:2000022;GO:0009269;GO:0042803;GO:1902066;GO:0080001;GO:0010103;GO:0010150;GO:0009733;GO:0090558;GO:…	BP;BP;BP;BP;BP;MF;MF;BP;BP;CC;BP;BP;BP;BP;BP;BP;CC;BP;CC;BP;BP;BP;BP;BP;BP;MF;CC;BP;BP;MF;BP;BP;BP;BP;BP;BP;MF;BP;BP;MF;BP;BP;MF;CC;BP;BP;BP;BP;CC;MF;BP;CC;BP;CC;BP;BP;MF;BP;BP;BP;MF;BP;BP;BP;MF;BP;BP;CC;BP;BP;CC;MF;BP;MF;BP;BP;CC;BP;CC;MF;BP;BP;BP;BP;BP;MF;BP;MF;BP;CC;BP;BP;BP;MF;MF;BP;BP;BP;BP;BP;BP;CC;CC;BP;BP;CC;BP;BP;BP;BP;BP;BP;CC;	regulation of iron ion transport;response to freezing;defense response;response to cadmium ion;response to salt stress;chromatin binding;transcription cis-regulatory region binding;positive regulation of gene expression;seed morphogenesis;cytoplasm;positive regulation of DNA-templated transcription;response to jasmonic acid;negative regulation of stomatal complex development;regulation of defense…	-	-	-	transcription factor DYT1-like [Brassica napus]	PF00082.26	Subtilase family	Transcription factor DYT1 OS=Arabidopsis thaliana OX=3702 GN=DYT1 PE=2 SV=1	3GIT3	K	Transcription factor DYSFUNCTIONAL TAPETUM	COG1404	Serine protease, subtilisin family	O	Posttranslational modification, protein turnover, chaperones	-	-	-	-	bHLH
BnaC06G0268000ZS	BnaC06G0268000ZS	7.04219	0.717246	1.55118e-05	0.00335734	nonsig	174.709	161.199	188.078	111.287	99.9846	84.7827	3765	3055	3136	1878	2217	1650	-	-	-	-	-	-	-	-	-	-	-	-	-	-	-	-	-	-	-	-	-	-
BnaA03G0228200ZS	BnaA03G0228200ZS	0.524017	-1.86638	1.55142e-05	0.00335734	down	0.290771	0.130648	0.205928	0.700966	0.675341	0.762676	27	11	15	51	65	64	GO:0007399;GO:0045892;GO:2000045;GO:2000070;GO:0051276;GO:0005634;GO:0071565;GO:0005654;GO:0006366;GO:0016514;GO:0045597;GO:1902459;GO:0030071;GO:0045663;GO:0000776;GO:0003682;GO:0042393;GO:0000122;GO:0071564;GO:0070316;GO:0016363;GO:0045944;GO:0006357;GO:0008284;GO:0003677;GO:0045582;GO:0006368;GO:0006355;GO:0040029;GO:0005737;GO:2000819;GO:0045893;GO:0008270;GO:0035060;GO:0031496;GO:0008286;GO:…	BP;BP;BP;BP;BP;CC;CC;CC;BP;CC;BP;BP;BP;BP;CC;MF;MF;BP;CC;BP;CC;BP;BP;BP;MF;BP;BP;BP;BP;CC;BP;BP;MF;CC;BP;BP;BP;BP;CC;CC;BP;MF;BP;BP;BP;CC;CC;BP;BP;CC;CC;CC;BP;CC;BP;BP;BP;BP;	nervous system development;negative regulation of DNA-templated transcription;regulation of G1/S transition of mitotic cell cycle;regulation of response to water deprivation;chromosome organization;nucleus;nBAF complex;nucleoplasm;transcription by RNA polymerase II;SWI/SNF complex;positive regulation of cell differentiation;positive regulation of stem cell population maintenance;regulation of mit…	K11649	-	-	SWI/SNF complex subunit SWI3A [Brassica rapa]	PF16495.9	SWIRM-associated region 1	SWI/SNF complex subunit SWI3A OS=Arabidopsis thaliana OX=3702 GN=SWI3A PE=1 SV=1	3G9UR	I	Caffeoylshikimate esterase-like	-	-	-	-	KOG1279	[B]	Chromatin structure and dynamics;	Chromatin remodeling factor subunit and related transcription factors	-
BnaC01G0038700ZS	BnaC01G0038700ZS	6.72204	-0.64713	1.55555e-05	0.00335734	nonsig	86.9356	80.9965	92.8568	136.763	125.423	116.444	8123	6654	6713	10006	12058	9824	GO:0016020;GO:0000741;GO:0009651;GO:0010197;GO:0005739;	CC;BP;BP;BP;CC;	membrane;karyogamy;response to salt stress;polar nucleus fusion;mitochondrion;	-	-	-	protein NUCLEAR FUSION DEFECTIVE 4 [Brassica napus]	PF06813.17	Nodulin-like	Protein NUCLEAR FUSION DEFECTIVE 4 OS=Arabidopsis thaliana OX=3702 GN=NFD4 PE=3 SV=1	3HR8C	S	Nodulin-like	COG2223	Nitrate/nitrite transporter NarK	P	Inorganic ion transport and metabolism	-	-	-	-	-
BnaA05G0048000ZS	BnaA05G0048000ZS	2.90503	-2.27946	1.56006e-05	0.00335734	down	2.71717	3.02681	3.99654	18.8934	4.84431	19.3104	79	78	90	429	145	506	GO:0009055;GO:0009536;GO:0009507;GO:0048653;GO:0000325;GO:1901141;GO:0048046;GO:0008017;GO:0099503;GO:0070417;GO:0071456;GO:0006979;GO:0009856;GO:0005509;GO:0009877;GO:0005886;GO:0015690;GO:0005737;GO:0046872;GO:0009646;GO:0005829;GO:0002239;GO:0016020;GO:0043659;GO:0045104;GO:0098552;GO:0009610;GO:0005773;GO:0031012;GO:0009506;GO:0005856;	MF;CC;CC;BP;CC;BP;CC;MF;CC;BP;BP;BP;BP;MF;BP;CC;BP;CC;MF;BP;CC;BP;CC;CC;BP;CC;BP;CC;CC;CC;CC;	electron transfer activity;plastid;chloroplast;anther development;plant-type vacuole;regulation of lignin biosynthetic process;apoplast;microtubule binding;secretory vesicle;cellular response to cold;cellular response to hypoxia;response to oxidative stress;pollination;calcium ion binding;nodulation;plasma membrane;aluminum cation transport;cytoplasm;metal ion binding;response to absence of light…	-	-	-	uclacyanin-2-like [Brassica napus]	PF02298.21	Plastocyanin-like domain	Uclacyanin-2 OS=Arabidopsis thaliana OX=3702 GN=At2g44790 PE=2 SV=1	3I0HJ	S	copper ion binding electron carrier	-	-	-	-	-	-	-	-	-
BnaA05G0499700ZS	BnaA05G0499700ZS	6.56538	-0.769808	1.56193e-05	0.00335734	nonsig	73.4421	61.9655	90.5736	129.083	117.691	107.875	1645	1220	1569	2264	2712	2181	GO:0009536;GO:0009507;GO:0016208;GO:0005886;GO:0005524;GO:0005829;GO:0002238;	CC;CC;MF;CC;MF;CC;BP;	plastid;chloroplast;AMP binding;plasma membrane;ATP binding;cytosol;response to molecule of fungal origin;	-	-	-	universal stress protein PHOS32-like [Brassica napus]	PF00582.30	Universal stress protein family	Universal stress protein A-like protein OS=Arabidopsis thaliana OX=3702 GN=At3g01520 PE=1 SV=2	3HWCF	S	Universal stress protein	COG0589	Nucleotide-binding universal stress protein, UspA family	T	Signal transduction mechanisms	-	-	-	-	-
BnaC04G0616300ZS	BnaC04G0616300ZS	1.01931	-1.8392	1.6435e-05	0.00351466	down	0.540619	0.301745	0.73786	2.24352	1.74592	1.23416	27	13	28	86	88	55	GO:0090430;GO:0030424;GO:0005634;GO:0003846;GO:0071944;GO:0005739;GO:0005811;GO:0016042;GO:0046686;GO:0043196;GO:0009966;GO:0006979;GO:0046464;GO:0052151;GO:0046503;GO:0010043;GO:0050727;GO:0045202;GO:0042803;GO:0004622;GO:0005886;GO:0005789;GO:2000124;GO:0042542;GO:0006633;GO:0005737;GO:0006641;GO:0009274;GO:0016787;GO:0017171;GO:0009809;GO:0060292;GO:0005829;GO:0005576;GO:0047372;GO:0016020;GO:…	MF;CC;CC;MF;CC;CC;CC;BP;BP;CC;BP;BP;BP;BP;BP;BP;BP;CC;MF;MF;CC;CC;BP;BP;BP;CC;BP;CC;MF;MF;BP;BP;CC;CC;MF;CC;BP;CC;CC;BP;MF;CC;BP;BP;BP;BP;CC;BP;BP;	caffeoyl-CoA: alcohol caffeoyl transferase activity;axon;nucleus;2-acylglycerol O-acyltransferase activity;cell periphery;mitochondrion;lipid droplet;lipid catabolic process;response to cadmium ion;varicosity;regulation of signal transduction;response to oxidative stress;acylglycerol catabolic process;symbiont-mediated activation of host apoptosis;glycerolipid catabolic process;response to zinc i…	K18368	ko01100;ko00561	Metabolic pathways;Glycerolipid metabolism	caffeoylshikimate esterase isoform X1 [Brassica napus]	PF12146.12	Serine aminopeptidase, S33	Caffeoylshikimate esterase OS=Arabidopsis thaliana OX=3702 GN=CSE PE=1 SV=1	3HP3A	I	Caffeoylshikimate esterase-like	COG2267	Lysophospholipase, alpha-beta hydrolase superfamily	I	Lipid transport and metabolism	KOG1455	[I]	Lipid transport and metabolism;	Lysophospholipase	-
BnaC03G0462300ZS	BnaC03G0462300ZS	2.60762	-1.1846	1.66223e-05	0.00353667	down	3.53428	3.13925	3.8817	7.00799	10.1349	5.27495	343	268	291	532	1010	461	GO:0072720;GO:0070062;GO:0016597;GO:1901135;GO:0030448;GO:0006541;GO:0005975;GO:0030246;GO:1901137;GO:0006487;GO:0006112;GO:0010208;GO:0034221;GO:0005886;GO:0097367;GO:0045719;GO:0034976;GO:0005737;GO:0004360;GO:1990830;GO:0006002;GO:0006042;GO:0042802;GO:0006038;GO:0032922;GO:0005829;GO:0032868;GO:0006031;GO:0006047;GO:0006048;GO:0032869;GO:0009744;	BP;CC;MF;BP;BP;BP;BP;MF;BP;BP;BP;BP;BP;CC;MF;BP;BP;CC;MF;BP;BP;BP;MF;BP;BP;CC;BP;BP;BP;BP;BP;BP;	response to dithiothreitol;extracellular exosome;amino acid binding;carbohydrate derivative metabolic process;hyphal growth;glutamine metabolic process;carbohydrate metabolic process;carbohydrate binding;carbohydrate derivative biosynthetic process;protein N-linked glycosylation;energy reserve metabolic process;pollen wall assembly;obsolete fungal-type cell wall chitin biosynthetic process;plasma…	K00820	ko01100;ko00250;ko00520	Metabolic pathways;Alanine, aspartate and glutamate metabolism;Amino sugar and nucleotide sugar metabolism	glutamine--fructose-6-phosphate aminotransferase [isomerizing] 1 [Brassica napus]	PF01380.26	SIS domain	Glutamine--fructose-6-phosphate aminotransferase [isomerizing] 1 OS=Arabidopsis thaliana OX=3702 GN=GFAT1 PE=2 SV=1	3HPKR	M	Glutamine--fructose-6-phosphate aminotransferase isomerizing 2-like	COG0449	Glucosamine 6-phosphate synthetase, contains amidotransferase and phosphosugar isomerase domains	M	Cell wall/membrane/envelope biogenesis	KOG1268	[M]	Cell wall/membrane/envelope biogenesis;	Glucosamine 6-phosphate synthetases, contain amidotransferase and phosphosugar isomerase domains	-
BnaC09G0472200ZS	BnaC09G0472200ZS	4.31485	1.02148	1.76186e-05	0.00372091	up	31.9112	22.3772	30.3639	12.7662	15.8471	10.1041	1663	1026	1224	521	850	476	GO:0009749;GO:0070981;GO:0097164;GO:0042538;GO:0009063;GO:0043617;GO:0045335;GO:0009506;GO:0006529;GO:0009646;GO:0005839;GO:0006541;GO:0009750;GO:0005524;GO:0005829;GO:0004066;GO:0009744;	BP;BP;BP;BP;BP;BP;CC;CC;BP;BP;CC;BP;BP;MF;CC;MF;BP;	response to glucose;L-asparagine biosynthetic process;ammonium ion metabolic process;hyperosmotic salinity response;amino acid catabolic process;cellular response to sucrose starvation;phagocytic vesicle;plasmodesma;asparagine biosynthetic process;response to absence of light;proteasome core complex;glutamine metabolic process;response to fructose;ATP binding;cytosol;asparagine synthase (glutamin…	-	-	-	stem-specific protein TSJT1-like [Brassica napus]	PF12481.12	Aluminium induced protein	Stem-specific protein TSJT1 OS=Nicotiana tabacum OX=4097 GN=TSJT1 PE=2 SV=1	3HSCZ	S	DUF3700	COG0367	Asparagine synthetase B (glutamine-hydrolyzing)	E	Amino acid transport and metabolism	-	-	-	-	-
BnaC01G0060300ZS	BnaC01G0060300ZS	0.522306	-1.86959	1.76658e-05	0.00372091	down	0.293779	0.125705	0.204659	0.845477	0.5714	0.725182	34	13	19	77	68	76	GO:0042287;GO:0019899;GO:0010498;GO:0042335;GO:0061630;GO:0000209;GO:0043161;GO:0071712;GO:0039648;GO:0005765;GO:0030433;GO:0004842;GO:0010345;GO:0005637;GO:0044174;GO:0046776;GO:0031902;GO:1990381;GO:0005886;GO:0005789;GO:0005635;GO:0033644;GO:0044167;GO:0005737;GO:0043231;GO:0008270;GO:0006955;GO:0070936;GO:0010025;GO:0000837;GO:0008299;GO:0031901;GO:1900486;GO:0030970;GO:0010143;GO:0036503;GO:…	MF;MF;BP;BP;MF;BP;BP;BP;BP;CC;BP;MF;BP;CC;CC;BP;CC;MF;CC;CC;CC;CC;CC;CC;CC;MF;BP;BP;BP;CC;BP;CC;BP;BP;BP;BP;CC;CC;CC;BP;CC;CC;BP;MF;BP;CC;CC;MF;CC;	MHC protein binding;enzyme binding;proteasomal protein catabolic process;cuticle development;ubiquitin protein ligase activity;protein polyubiquitination;proteasome-mediated ubiquitin-dependent protein catabolic process;obsolete ER-associated misfolded protein catabolic process;symbiont-mediated perturbation of host ubiquitin-like protein modification;lysosomal membrane;obsolete ubiquitin-depende…	K10661	ko04141	Protein processing in endoplasmic reticulum	PREDICTED: LOW QUALITY PROTEIN: probable E3 ubiquitin ligase SUD1 [Brassica oleracea var. oleracea]	PF12906.11	RING-variant domain	Probable E3 ubiquitin ligase SUD1 OS=Arabidopsis thaliana OX=3702 GN=SUD1 PE=1 SV=1	3GAA8	A	E3 ubiquitin ligase SUD1	-	-	-	-	KOG1609	[A]	RNA processing and modification;	Protein involved in mRNA turnover and stability	-
BnaA09G0561000ZS	BnaA09G0561000ZS	4.65958	-1.18909	1.80001e-05	0.00377238	down	19.3788	17.5864	12.9994	39.3081	34.6393	33.2165	323	258	168	513	594	500	-	-	-	-	-	-	uncharacterized protein LOC106368495 [Brassica napus]	PF07648.19	Kazal-type serine protease inhibitor domain	-	3I0U1	S	serine protease inhibitor, Kazal-type family protein	-	-	-	-	-	-	-	-	-
BnaC08G0405400ZS	BnaC08G0405400ZS	1.63143	1.38937	1.85444e-05	0.00386711	up	2.42602	3.52089	4.3972	1.36707	0.977523	1.26022	189	241	265	84	79	89	GO:0030424;GO:0051301;GO:0045214;GO:0005634;GO:0060090;GO:0014032;GO:0043066;GO:0030036;GO:0061061;GO:0014029;GO:1990390;GO:1901992;GO:0003779;GO:0006513;GO:0031674;GO:0016605;GO:0006511;GO:0030057;GO:0050853;GO:0005802;GO:0030425;GO:0015629;GO:0019964;GO:0035455;GO:0048471;GO:0006895;GO:0004842;GO:0048808;GO:0036269;GO:0000902;GO:0007049;GO:0015031;GO:0098978;GO:0042803;GO:0045109;GO:0007010;GO:…	CC;BP;BP;CC;MF;BP;BP;BP;BP;BP;BP;BP;MF;BP;CC;CC;BP;CC;BP;CC;CC;CC;MF;BP;CC;BP;MF;BP;BP;BP;BP;BP;CC;MF;BP;BP;CC;CC;CC;CC;BP;BP;BP;BP;BP;CC;CC;MF;BP;MF;BP;BP;MF;BP;BP;CC;CC;CC;BP;CC;BP;BP;BP;BP;CC;CC;BP;BP;CC;MF;BP;CC;BP;BP;BP;BP;BP;MF;BP;CC;BP;BP;	axon;cell division;sarcomere organization;nucleus;molecular adaptor activity;neural crest cell development;negative regulation of apoptotic process;actin cytoskeleton organization;muscle structure development;neural crest formation;protein K33-linked ubiquitination;positive regulation of mitotic cell cycle phase transition;actin binding;protein monoubiquitination;I band;PML body;ubiquitin-depende…	-	-	-	BTB/POZ domain-containing protein POB1 [Brassica napus]	PF00651.35	BTB/POZ domain	BTB/POZ domain-containing protein POB1 OS=Arabidopsis thaliana OX=3702 GN=POB1 PE=1 SV=2	3HSMN	S	BTB POZ domain-containing protein	-	-	-	-	-	-	-	-	-
BnaA04G0290000ZS	BnaA04G0290000ZS	1.50123	-2.27001	2.00652e-05	0.00416353	down	0.39826	0.829214	1.27882	2.79335	2.62103	5.42808	15	28	37	82	101	184	GO:0016310;GO:0004672;GO:0004674;GO:0004842;GO:0106310;GO:0016567;GO:0005524;GO:0005829;	BP;MF;MF;MF;MF;BP;MF;CC;	phosphorylation;protein kinase activity;protein serine/threonine kinase activity;ubiquitin-protein transferase activity;protein serine kinase activity;protein ubiquitination;ATP binding;cytosol;	-	-	-	U-box domain-containing protein 33-like [Brassica napus]	-	-	U-box domain-containing protein 33 OS=Arabidopsis thaliana OX=3702 GN=PUB33 PE=2 SV=2	3HN9A	T	U-box domain-containing protein	-	-	-	-	-	-	-	-	-
BnaA06G0166200ZS	BnaA06G0166200ZS	5.33974	0.793191	2.0473e-05	0.00422722	nonsig	52.9245	53.7414	55.3167	26.434	31.4401	28.8146	3126	2791	2528	1223	1911	1537	GO:0045722;GO:0035556;GO:0008603;GO:1904547;GO:0006754;GO:0005634;GO:0004679;GO:0005641;GO:0005975;GO:0005739;GO:0005654;GO:0046320;GO:0006469;GO:0014873;GO:0045860;GO:0006110;GO:0007031;GO:0000166;GO:0010800;GO:0006357;GO:0019887;GO:0043539;GO:0005886;GO:0042128;GO:0006633;GO:0005737;GO:0008607;GO:0006177;GO:0031588;GO:0019217;GO:0019901;GO:0042802;GO:0005977;GO:0046324;GO:0046872;GO:0031669;GO:…	BP;BP;MF;BP;BP;CC;MF;CC;BP;CC;CC;BP;BP;BP;BP;BP;BP;MF;BP;BP;MF;MF;CC;BP;BP;CC;MF;BP;CC;BP;MF;MF;BP;BP;MF;BP;BP;BP;BP;CC;BP;CC;BP;BP;MF;MF;MF;MF;MF;MF;	positive regulation of gluconeogenesis;intracellular signal transduction;cAMP-dependent protein kinase regulator activity;regulation of cellular response to glucose starvation;ATP biosynthetic process;nucleus;AMP-activated protein kinase activity;nuclear envelope lumen;carbohydrate metabolic process;mitochondrion;nucleoplasm;regulation of fatty acid oxidation;negative regulation of protein kinase…	-	-	-	SNF1-related protein kinase regulatory subunit gamma-1 [Brassica napus]	PF00571.32	CBS domain	SNF1-related protein kinase regulatory subunit gamma-1 OS=Arabidopsis thaliana OX=3702 GN=KING1 PE=1 SV=2	3HXCE	C	snf1-related protein kinase regulatory subunit	COG0517	CBS domain	T	Signal transduction mechanisms	KOG1764	[C]	Energy production and conversion;	5'-AMP-activated protein kinase, gamma subunit	-
BnaA10G0025500ZS	BnaA10G0025500ZS	5.05129	-0.82539	2.07948e-05	0.00426804	nonsig	24.8282	23.0504	27.6795	42.571	48.0962	33.874	470	383	405	630	935	578	GO:0009723;GO:0009415;GO:0042335;GO:0009880;GO:0006952;GO:0071369;GO:0048825;GO:0009651;GO:0071456;GO:0001666;GO:1900036;GO:0009739;GO:0000976;GO:0009620;GO:0005737;GO:0009864;GO:0045893;GO:0009753;GO:0031347;GO:0009835;GO:0010143;GO:0010166;GO:0008219;GO:1904277;GO:0010104;GO:0009408;GO:0009617;GO:0051726;GO:0010030;GO:0009788;GO:0009735;GO:0009409;GO:0045595;GO:0009877;GO:0050832;GO:1990837;GO:…	BP;BP;BP;BP;BP;BP;BP;BP;BP;BP;BP;BP;MF;BP;CC;BP;BP;BP;BP;BP;BP;BP;BP;BP;BP;BP;BP;BP;BP;BP;BP;BP;BP;BP;BP;MF;BP;BP;BP;MF;MF;BP;BP;BP;BP;BP;BP;CC;BP;BP;BP;BP;BP;BP;BP;BP;BP;BP;BP;BP;BP;BP;BP;BP;BP;BP;BP;BP;BP;CC;BP;BP;BP;BP;BP;BP;BP;BP;BP;BP;BP;BP;MF;CC;BP;BP;BP;BP;BP;MF;BP;BP;CC;BP;BP;BP;BP;BP;BP;BP;BP;	response to ethylene;response to water;cuticle development;embryonic pattern specification;defense response;cellular response to ethylene stimulus;cotyledon development;response to salt stress;cellular response to hypoxia;response to hypoxia;positive regulation of cellular response to heat;response to gibberellin;transcription cis-regulatory region binding;response to fungus;cytoplasm;induced sys…	-	-	-	LOW QUALITY PROTEIN: ethylene-responsive transcription factor 14 [Brassica napus]	PF00847.24	AP2 domain	Ethylene-responsive transcription factor 14 OS=Arabidopsis thaliana OX=3702 GN=ERF14 PE=2 SV=1	3I0WF	K	DNA-binding domain in plant proteins such as APETALA2 and EREBPs	-	-	-	-	-	-	-	-	AP2/ERF-ERF
BnaC09G0300400ZS	BnaC09G0300400ZS	0.372405	1.64765	2.08916e-05	0.00426804	up	0.50436	0.405415	0.511645	0.149223	0.120085	0.143851	72	51	57	17	18	19	GO:0006260;GO:0008023;GO:0006335;GO:0005634;GO:0032968;GO:0006281;GO:0032784;GO:0007063;GO:0005654;GO:0006366;GO:0031298;GO:0005730;GO:0003682;GO:0003723;GO:0042393;GO:0045899;GO:0000511;GO:0000791;GO:0140719;GO:0006368;GO:0060465;GO:0045995;GO:0010228;GO:0140713;GO:0046982;GO:0045787;GO:0031491;GO:0060261;GO:0035101;GO:0000785;GO:0005829;GO:0034728;GO:0006334;GO:0032786;GO:1902275;GO:0005703;GO:…	BP;CC;BP;CC;BP;BP;BP;BP;CC;BP;CC;CC;MF;MF;MF;BP;MF;CC;BP;BP;BP;BP;BP;MF;MF;BP;MF;BP;CC;CC;CC;BP;BP;BP;BP;CC;BP;BP;BP;BP;BP;BP;	DNA replication;transcription elongation factor complex;DNA replication-dependent chromatin assembly;nucleus;positive regulation of transcription elongation by RNA polymerase II;DNA repair;regulation of DNA-templated transcription elongation;regulation of sister chromatid cohesion;nucleoplasm;transcription by RNA polymerase II;replication fork protection complex;nucleolus;chromatin binding;RNA bi…	-	-	-	PREDICTED: FACT complex subunit SPT16-like [Brassica oleracea var. oleracea]	PF14826.10	FACT complex subunit SPT16 N-terminal lobe domain	FACT complex subunit SPT16 OS=Arabidopsis thaliana OX=3702 GN=SPT16 PE=1 SV=1	3HR1R	K	FACT complex subunit (SPT16/CDC68)	COG0006	Xaa-Pro aminopeptidase	E	Amino acid transport and metabolism	KOG1189	[E]	Amino acid transport and metabolism;	Global transcriptional regulator, cell division control protein	-
BnaC02G0428300ZS	BnaC02G0428300ZS	0.765118	4.23459	2.09762e-05	0.00426804	up	1.23006	1.68521	2.28521	0	0	0.22485	45	54	65	0	0	8	-	-	-	-	-	-	uncharacterized protein LOC125583046 [Brassica napus]	PF02902.23	Ulp1 protease family, C-terminal catalytic domain	-	-	-	-	-	-	-	-	-	-	-	-	-
BnaC05G0545300ZS	BnaC05G0545300ZS	1.94287	-1.31575	2.1299e-05	0.00431279	down	1.37558	2.13358	2.00882	3.83962	4.57978	4.34003	58	80	66	127	199	166	GO:0008652;GO:0030424;GO:0006790;GO:0042132;GO:0005634;GO:0009507;GO:0009738;GO:0031403;GO:0004401;GO:0005975;GO:0006553;GO:0019674;GO:0009409;GO:0007165;GO:0006741;GO:0001072;GO:0004441;GO:0051287;GO:0046854;GO:0003723;GO:0006935;GO:0000166;GO:0035418;GO:0071545;GO:0000105;GO:0000103;GO:0042803;GO:0005886;GO:0009570;GO:0003951;GO:0005737;GO:0031564;GO:0106411;GO:0050427;GO:0030145;GO:0016787;GO:…	BP;CC;BP;MF;CC;CC;BP;MF;MF;BP;BP;BP;BP;BP;BP;MF;MF;MF;BP;MF;BP;MF;BP;BP;BP;BP;MF;CC;CC;MF;CC;BP;MF;BP;MF;MF;MF;MF;MF;MF;BP;MF;CC;BP;CC;MF;BP;MF;BP;BP;BP;MF;MF;MF;MF;BP;BP;BP;BP;MF;BP;MF;BP;MF;MF;	amino acid biosynthetic process;axon;sulfur compound metabolic process;fructose 1,6-bisphosphate 1-phosphatase activity;nucleus;chloroplast;abscisic acid-activated signaling pathway;lithium ion binding;histidinol-phosphatase activity;carbohydrate metabolic process;lysine metabolic process;NAD metabolic process;response to cold;signal transduction;NADP biosynthetic process;transcription antitermin…	K10047	ko04070;ko00562;ko00053;ko01110;ko01100	Phosphatidylinositol signaling system;Inositol phosphate metabolism;Ascorbate and aldarate metabolism;Biosynthesis of secondary metabolites;Metabolic pathways	inositol-phosphate phosphatase isoform X2 [Brassica rapa]	PF00459.29	Inositol monophosphatase family	Inositol-phosphate phosphatase OS=Arabidopsis thaliana OX=3702 GN=VTC4 PE=1 SV=1	3HPQC	G	Inositol monophosphatase family	COG0483	Archaeal fructose-1,6-bisphosphatase or related enzyme, inositol monophosphatase family	G	Carbohydrate transport and metabolism	KOG2951	[G]	Carbohydrate transport and metabolism;	Inositol monophosphatase	-
BnaA02G0177900ZS	BnaA02G0177900ZS	1.78173	0.782845	2.23071e-05	0.00449519	nonsig	3.09703	2.84987	3.96109	1.86169	1.75994	1.67371	742	600	734	350	434	362	GO:0009063;GO:0009234;GO:0000287;GO:0030145;GO:0044272;GO:0042550;GO:0046872;GO:0031969;GO:0042372;GO:0070204;GO:0043748;GO:0042803;GO:0070205;GO:0019752;GO:0006082;GO:0030976;	BP;BP;MF;MF;BP;BP;MF;CC;BP;MF;MF;MF;MF;BP;BP;MF;	amino acid catabolic process;menaquinone biosynthetic process;magnesium ion binding;manganese ion binding;sulfur compound biosynthetic process;photosystem I stabilization;metal ion binding;chloroplast membrane;phylloquinone biosynthetic process;2-succinyl-5-enolpyruvyl-6-hydroxy-3-cyclohexene-1-carboxylic-acid synthase activity;O-succinylbenzoate synthase activity;protein homodimerization activit…	K14759	ko01100;ko00130;ko01110	Metabolic pathways;Ubiquinone and other terpenoid-quinone biosynthesis;Biosynthesis of secondary metabolites	protein PHYLLO, chloroplastic isoform X1 [Brassica rapa]	PF13378.10	Enolase C-terminal domain-like	Protein PHYLLO, chloroplastic OS=Arabidopsis thaliana OX=3702 GN=PHYLLO PE=2 SV=2	3HQYW	E	Protein PHYLLO, chloroplastic	COG1165	2-succinyl-5-enolpyruvyl-6-hydroxy-3-cyclohexene-1-carboxylate synthase	H	Coenzyme transport and metabolism	KOG1223	[E]	Amino acid transport and metabolism;	Isochorismate synthase	-
BnaC08G0462600ZS	BnaC08G0462600ZS	0.905075	1.66796	2.25571e-05	0.00451262	up	1.78826	1.01122	1.66074	0.499864	0.510275	0.275923	123	61	88	27	36	18	GO:0070062;GO:0043621;GO:0009758;GO:0098793;GO:0043066;GO:0055056;GO:0005536;GO:0005975;GO:0022857;GO:0012505;GO:0007611;GO:0009651;GO:0030667;GO:0030315;GO:0071456;GO:0001666;GO:0010021;GO:0070821;GO:0071548;GO:0055085;GO:0043204;GO:1904016;GO:0005737;GO:0030140;GO:0016323;GO:1990350;GO:0051119;GO:0005901;GO:0015575;GO:0015145;GO:0030496;GO:0015284;GO:0005615;GO:0005794;GO:0009941;GO:0000324;GO:…	CC;MF;BP;CC;BP;MF;MF;BP;MF;CC;BP;BP;CC;CC;BP;BP;BP;CC;BP;BP;CC;BP;CC;CC;CC;CC;MF;CC;MF;MF;CC;MF;CC;CC;CC;CC;MF;CC;MF;BP;BP;CC;BP;BP;BP;CC;BP;BP;CC;BP;CC;CC;BP;BP;BP;BP;CC;MF;CC;CC;CC;CC;BP;BP;CC;BP;CC;CC;CC;MF;BP;BP;MF;CC;MF;BP;CC;MF;BP;CC;CC;MF;CC;BP;MF;CC;CC;BP;MF;MF;BP;MF;BP;CC;BP;CC;BP;BP;CC;CC;CC;MF;MF;BP;CC;MF;CC;BP;CC;MF;BP;CC;BP;CC;BP;MF;MF;CC;BP;BP;CC;BP;MF;BP;BP;CC;BP;BP;BP;BP;MF;CC;CC;…	extracellular exosome;obsolete protein self-association;carbohydrate utilization;presynapse;negative regulation of apoptotic process;D-glucose transmembrane transporter activity;D-glucose binding;carbohydrate metabolic process;transmembrane transporter activity;endomembrane system;learning or memory;response to salt stress;secretory granule membrane;T-tubule;cellular response to hypoxia;response …	K03444	-	-	sugar transporter ERD6-like 4 [Brassica napus]	PF00083.28	Sugar (and other) transporter	Sugar transporter ERD6-like 4 OS=Arabidopsis thaliana OX=3702 GN=At1g19450 PE=2 SV=1	3HW9D	U	Belongs to the major facilitator superfamily. Sugar transporter (TC 2.A.1.1) family	COG0477	MFS family permease, includes anhydromuropeptide permease AmpG	GEPR	-	KOG0254	[R]	General function prediction only;	Predicted transporter (major facilitator superfamily)	-
BnaA02G0197800ZS	BnaA02G0197800ZS	0.971436	-2.45352	2.26088e-05	0.00451262	down	0.427023	0.376964	0.319936	1.50442	1.04386	3.2808	20	16	12	54	50	136	GO:1904680;GO:0048573;GO:0010119;GO:0043201;GO:1902600;GO:0070424;GO:0022857;GO:0045089;GO:0046686;GO:0006857;GO:0000138;GO:0006821;GO:0009753;GO:0015333;GO:0015108;GO:0034157;GO:0080054;GO:0005794;GO:0000324;GO:0080052;GO:0015386;GO:0009793;GO:0042538;GO:0042938;GO:0045087;GO:0034161;GO:0010540;GO:0035579;GO:0048302;GO:0010150;GO:0070434;GO:0031901;GO:0042939;GO:0010542;GO:0071916;GO:0042742;GO:…	MF;BP;BP;BP;BP;BP;MF;BP;BP;BP;CC;BP;BP;MF;MF;BP;MF;CC;CC;BP;MF;BP;BP;BP;BP;BP;BP;CC;BP;BP;BP;CC;BP;MF;MF;BP;MF;MF;BP;BP;BP;CC;BP;BP;BP;BP;BP;BP;CC;BP;BP;MF;CC;BP;BP;BP;BP;CC;BP;BP;BP;BP;BP;BP;BP;BP;MF;MF;BP;BP;CC;CC;BP;CC;BP;CC;MF;MF;BP;CC;BP;CC;BP;BP;BP;CC;BP;CC;BP;CC;BP;BP;BP;BP;CC;MF;BP;MF;CC;	peptide transmembrane transporter activity;photoperiodism, flowering;regulation of stomatal movement;response to L-leucine;proton transmembrane transport;regulation of nucleotide-binding domain, leucine rich repeat containing receptor signaling pathway;transmembrane transporter activity;positive regulation of innate immune response;response to cadmium ion;oligopeptide transport;Golgi trans cister…	-	-	-	protein NRT1/ PTR FAMILY 5.12 [Brassica rapa]	PF00854.25	POT family	Protein NRT1/ PTR FAMILY 5.12 OS=Arabidopsis thaliana OX=3702 GN=NPF5.12 PE=2 SV=1	3G9AW	E	Protein NRT1 PTR FAMILY	-	-	-	-	KOG1237	[E]	Amino acid transport and metabolism;	H+/oligopeptide symporter	-
BnaC03G0801900ZS	BnaC03G0801900ZS	3.6858	-1.36834	2.28374e-05	0.00452769	down	9.04187	8.26809	5.62887	18.3454	23.2742	14.6766	188	151	91	298	496	275	-	-	-	-	-	-	PREDICTED: uncharacterized PE-PGRS family protein PE_PGRS3-like [Brassica oleracea var. oleracea]	-	-	-	-	-	-	-	-	-	-	-	-	-	-	-
BnaC09G0008900ZS	BnaC09G0008900ZS	1.1311	2.54201	2.29004e-05	0.00452769	up	2.77839	4.25992	0.92105	0.251563	0.586168	0.456604	374	506	96	28	83	55	GO:0051592;GO:0000033;GO:0005634;GO:0005985;GO:0010431;GO:0009413;GO:0006488;GO:0009409;GO:0080165;GO:0071836;GO:0051262;GO:0009749;GO:0008375;GO:0071456;GO:0005982;GO:0001666;GO:0072708;GO:0000166;GO:0010208;GO:0048471;GO:0046351;GO:0048306;GO:0006970;GO:0006486;GO:0009877;GO:0005886;GO:0005789;GO:0005737;GO:0102704;GO:0046982;GO:0005986;GO:0016757;GO:0006490;GO:0005829;GO:0010555;GO:0005576;GO:…	BP;MF;CC;BP;BP;BP;BP;BP;BP;BP;BP;BP;MF;BP;BP;BP;BP;MF;BP;CC;BP;MF;BP;BP;BP;CC;CC;CC;MF;MF;BP;MF;BP;CC;BP;CC;CC;BP;MF;CC;MF;MF;MF;MF;BP;CC;MF;CC;CC;BP;MF;CC;BP;BP;BP;	response to calcium ion;alpha-1,3-mannosyltransferase activity;nucleus;sucrose metabolic process;seed maturation;response to flooding;dolichol-linked oligosaccharide biosynthetic process;response to cold;callose deposition in phloem sieve plate;nectar secretion;protein tetramerization;response to glucose;acetylglucosaminyltransferase activity;cellular response to hypoxia;starch metabolic process;…	K00695	ko00500;ko01100	Starch and sucrose metabolism;Metabolic pathways	PREDICTED: sucrose synthase 3 isoform X1 [Brassica oleracea var. oleracea]	PF00862.23	Sucrose synthase	Sucrose synthase 3 OS=Arabidopsis thaliana OX=3702 GN=SUS3 PE=1 SV=1	3HX3E	M	sucrose synthase	COG0438	Glycosyltransferase involved in cell wall bisynthesis	M	Cell wall/membrane/envelope biogenesis	KOG0853	[M]	Cell wall/membrane/envelope biogenesis;	Glycosyltransferase	-
BnaC06G0241900ZS	BnaC06G0241900ZS	4.13288	-2.04723	2.34947e-05	0.00462339	down	6.35298	12.1476	8.18765	33.6036	57.3087	15.2686	172	289	172	711	1593	373	GO:0000287;GO:0009690;GO:0005794;GO:0009507;GO:0002055;GO:0006166;GO:0016208;GO:0015114;GO:0003999;GO:0005737;GO:0005886;GO:0006168;GO:0042803;GO:0005829;GO:0044209;	MF;BP;CC;CC;MF;BP;MF;MF;MF;CC;CC;BP;MF;CC;BP;	magnesium ion binding;cytokinin metabolic process;Golgi apparatus;chloroplast;adenine binding;purine ribonucleoside salvage;AMP binding;obsolete phosphate ion transmembrane transporter activity;adenine phosphoribosyltransferase activity;cytoplasm;plasma membrane;adenine salvage;protein homodimerization activity;cytosol;AMP salvage;	K00759	ko00230;ko01100	Purine metabolism;Metabolic pathways	adenine phosphoribosyltransferase 2-like [Brassica napus]	PF00156.31	Phosphoribosyl transferase domain	Adenine phosphoribosyltransferase 2 OS=Arabidopsis thaliana OX=3702 GN=APT2 PE=1 SV=1	3HYMA	F	Adenine phosphoribosyltransferase	COG0503	Adenine/guanine phosphoribosyltransferase or related PRPP-binding protein	F	Nucleotide transport and metabolism	KOG1712	[F]	Nucleotide transport and metabolism;	Adenine phosphoribosyl transferases	-
BnaA03G0371000ZS	BnaA03G0371000ZS	1.90411	-2.0892	2.40818e-05	0.00471676	down	0.835191	0.853759	2.40842	7.7203	4.52032	3.9247	18	16	39	124	96	73	GO:0016020;GO:0071494;GO:0006629;GO:0010513;GO:2000028;GO:0009737;GO:0005634;GO:0009738;GO:0006952;GO:0007623;GO:0055088;GO:0009617;GO:0005829;GO:0005886;GO:1900150;GO:0009863;GO:1902290;GO:0005737;GO:0046890;	CC;BP;BP;BP;BP;BP;CC;BP;BP;BP;BP;BP;CC;CC;BP;BP;BP;CC;BP;	membrane;cellular response to UV-C;lipid metabolic process;positive regulation of phosphatidylinositol biosynthetic process;regulation of photoperiodism, flowering;response to abscisic acid;nucleus;abscisic acid-activated signaling pathway;defense response;circadian rhythm;lipid homeostasis;response to bacterium;cytosol;plasma membrane;regulation of defense response to fungus;salicylic acid media…	-	-	-	PREDICTED: cysteine-rich and transmembrane domain-containing protein PCC1-like isoform X1 [Brassica oleracea var. oleracea]	-	-	Protein CYSTEINE-RICH TRANSMEMBRANE MODULE 9 OS=Arabidopsis thaliana OX=3702 GN=CYSTM9 PE=1 SV=1	-	-	-	-	-	-	-	-	-	-	-	-
BnaC02G0251800ZS	BnaC02G0251800ZS	1.31479	-1.83583	2.4244e-05	0.00472645	down	0.756805	0.673447	0.917495	4.02381	2.32852	1.51412	33	26	31	137	104	60	GO:0006952;GO:0000325;GO:0051707;GO:0048046;GO:0005739;GO:0099503;GO:0004672;GO:0005537;GO:0006979;GO:0009751;GO:0005886;GO:0009626;GO:0050832;GO:0012501;GO:0010497;GO:0009506;GO:0106310;GO:0046739;GO:0005829;GO:0009737;GO:0005576;GO:0016020;GO:0016310;GO:0004674;GO:0009505;GO:0042742;GO:0002237;GO:0005524;GO:0031640;GO:0009627;	BP;CC;BP;CC;CC;CC;MF;MF;BP;BP;CC;BP;BP;BP;BP;CC;MF;BP;CC;BP;CC;CC;BP;MF;CC;BP;BP;MF;BP;BP;	defense response;plant-type vacuole;response to other organism;apoplast;mitochondrion;secretory vesicle;protein kinase activity;D-mannose binding;response to oxidative stress;response to salicylic acid;plasma membrane;plant-type hypersensitive response;defense response to fungus;programmed cell death;plasmodesmata-mediated intercellular transport;plasmodesma;protein serine kinase activity;transpo…	-	-	-	plasmodesmata-located protein 5-like isoform X1 [Brassica napus]	PF01657.21	Salt stress response/antifungal	Plasmodesmata-located protein 5 OS=Arabidopsis thaliana OX=3702 GN=PDLP5 PE=1 SV=1	3GGUF	S	cysteine-rich repeat secretory protein	-	-	-	-	-	-	-	-	-
BnaC08G0505100ZS	BnaC08G0505100ZS	2.73137	1.02485	2.47175e-05	0.00479537	up	8.21107	6.77933	10.1694	4.09703	3.29281	3.89786	369	268	354	145	153	159	GO:0070062;GO:0005782;GO:0019521;GO:0008873;GO:0050661;GO:0005634;GO:0031406;GO:0006564;GO:0005739;GO:0016114;GO:0051287;GO:0004617;GO:0016616;GO:0046181;GO:0047964;GO:0042803;GO:0005886;GO:1901149;GO:0030267;GO:0019752;GO:0050609;GO:0005737;GO:0043648;GO:0046487;GO:0017000;GO:0070402;GO:0008720;GO:0046677;GO:0005829;GO:0071555;GO:1902494;GO:0102742;GO:0009854;GO:0008465;GO:0006091;GO:0009853;GO:…	CC;CC;BP;MF;MF;CC;MF;BP;CC;BP;MF;MF;MF;BP;MF;MF;CC;MF;MF;BP;MF;CC;BP;BP;BP;MF;MF;BP;CC;BP;CC;MF;BP;MF;BP;BP;MF;BP;MF;	extracellular exosome;peroxisomal matrix;D-gluconate metabolic process;gluconate 2-dehydrogenase activity;NADP binding;nucleus;carboxylic acid binding;L-serine biosynthetic process;mitochondrion;terpenoid biosynthetic process;NAD binding;phosphoglycerate dehydrogenase activity;oxidoreductase activity, acting on the CH-OH group of donors, NAD or NADP as acceptor;ketogluconate catabolic process;gly…	-	-	-	PREDICTED: glyoxylate/hydroxypyruvate reductase HPR3-like isoform X2 [Brassica oleracea var. oleracea]	PF02826.23	D-isomer specific 2-hydroxyacid dehydrogenase, NAD binding domain	Glyoxylate/hydroxypyruvate reductase HPR3 OS=Arabidopsis thaliana OX=3702 GN=HPR3 PE=1 SV=1	3HZWN	C	Belongs to the D-isomer specific 2-hydroxyacid dehydrogenase family	COG1052	Lactate dehydrogenase or related 2-hydroxyacid dehydrogenase	CHR	-	KOG0069	[C]	Energy production and conversion;	Glyoxylate/hydroxypyruvate reductase (D-isomer-specific 2-hydroxy acid dehydrogenase superfamily)	-
BnaA02G0377900ZS	BnaA02G0377900ZS	3.74909	-1.7005	2.48263e-05	0.00479537	down	4.69661	4.74007	13.4105	23.4574	22.9823	20.3808	92	82	202	358	460	358	GO:0046872;	MF;	metal ion binding;	-	-	-	heavy metal-associated isoprenylated plant protein 2-like isoform X1 [Brassica napus]	PF00403.30	Heavy-metal-associated domain	Heavy metal-associated isoprenylated plant protein 2 OS=Arabidopsis thaliana OX=3702 GN=HIPP02 PE=3 SV=1	3GM33	P	Heavy metal-associated isoprenylated plant protein	-	-	-	-	KOG1603	[P]	Inorganic ion transport and metabolism;	Copper chaperone	-
BnaC06G0397500ZS	BnaC06G0397500ZS	1.99398	-2.49142	2.5364e-05	0.00487676	down	1.71922	1.60841	0.515468	10.8311	2.99792	6.85718	117	96	28	576	210	421	GO:0016135;GO:0048387;GO:0010584;GO:0102557;GO:0048385;GO:0030343;GO:0042359;GO:0102097;GO:0071456;GO:0048284;GO:0009804;GO:0010295;GO:0001768;GO:0010628;GO:0021797;GO:0030326;GO:0102374;GO:0009687;GO:0005737;GO:0035992;GO:0016705;GO:0051777;GO:0055014;GO:0004508;GO:0032541;GO:0009753;GO:0008395;GO:0009835;GO:0030902;GO:0090242;GO:0048384;GO:0021661;GO:0006694;GO:0097038;GO:0007140;GO:0042574;GO:…	BP;BP;BP;MF;BP;MF;BP;MF;BP;BP;BP;MF;BP;BP;BP;BP;MF;BP;CC;BP;MF;MF;BP;MF;CC;BP;MF;BP;BP;BP;BP;BP;BP;CC;BP;BP;MF;MF;BP;BP;BP;BP;BP;MF;BP;BP;BP;BP;BP;BP;MF;CC;BP;BP;MF;BP;BP;MF;BP;MF;BP;BP;BP;BP;BP;BP;BP;BP;BP;BP;BP;MF;MF;BP;BP;BP;BP;MF;BP;MF;BP;MF;MF;MF;MF;BP;BP;BP;MF;BP;BP;BP;BP;BP;BP;BP;MF;BP;BP;MF;CC;BP;BP;BP;CC;BP;BP;BP;BP;MF;BP;BP;BP;MF;MF;CC;MF;BP;BP;BP;BP;BP;BP;BP;BP;BP;BP;MF;BP;BP;MF;BP;BP;…	saponin biosynthetic process;negative regulation of retinoic acid receptor signaling pathway;pollen exine formation;protopanaxadiol 6-hydroxylase activity;regulation of retinoic acid receptor signaling pathway;vitamin D3 25-hydroxylase activity;vitamin D metabolic process;22alpha-hydroxysteroid 23-monooxygenase activity;cellular response to hypoxia;organelle fusion;coumarin metabolic process;(+)-…	-	-	-	abietadienol/abietadienal oxidase [Brassica napus]	PF00067.26	Cytochrome P450	Abietadienol/abietadienal oxidase OS=Pinus taeda OX=3352 GN=CYP720B1 PE=1 SV=1	3HX3P	Q	cytochrome P450	COG2124	Cytochrome P450	QV	-	KOG0157	[QI]	Secondary metabolites biosynthesis, transport and catabolism; Lipid transport and metabolism;	Cytochrome P450 CYP4/CYP19/CYP26 subfamilies	-
BnaC03G0194600ZS	BnaC03G0194600ZS	1.05888	-2.16217	2.57914e-05	0.00491151	down	0.432119	0.459404	0.610433	1.11143	3.92493	1.33588	44	41	48	87	403	121	GO:0043621;GO:0006281;GO:0010584;GO:0006952;GO:0002768;GO:0048509;GO:0016301;GO:0002764;GO:0010449;GO:0012505;GO:0010183;GO:1905421;GO:0009651;GO:0045184;GO:0000166;GO:0035987;GO:0009556;GO:0009620;GO:0032541;GO:1990578;GO:0009729;GO:0009753;GO:0032491;GO:0048281;GO:0009695;GO:0031347;GO:0050829;GO:0002218;GO:0160073;GO:0038023;GO:0090696;GO:0010227;GO:0009266;GO:0032991;GO:0080092;GO:0002237;GO:…	MF;BP;BP;BP;BP;BP;MF;BP;BP;CC;BP;BP;BP;BP;MF;BP;BP;BP;CC;CC;BP;BP;BP;BP;BP;BP;BP;BP;BP;MF;BP;BP;BP;CC;BP;BP;BP;BP;BP;BP;BP;BP;BP;CC;BP;BP;BP;CC;BP;BP;BP;MF;BP;MF;MF;BP;BP;BP;BP;BP;BP;BP;BP;BP;BP;BP;MF;BP;CC;BP;BP;MF;BP;MF;MF;BP;BP;BP;BP;BP;MF;BP;BP;BP;MF;CC;BP;BP;BP;BP;CC;BP;BP;BP;BP;CC;BP;BP;MF;MF;BP;BP;BP;BP;BP;MF;CC;BP;CC;BP;BP;BP;BP;MF;BP;BP;MF;BP;BP;BP;BP;BP;CC;BP;BP;BP;BP;BP;MF;BP;BP;BP;BP;…	obsolete protein self-association;DNA repair;pollen exine formation;defense response;immune response-regulating cell surface receptor signaling pathway;regulation of meristem development;kinase activity;immune response-regulating signaling pathway;root meristem growth;endomembrane system;pollen tube guidance;regulation of plant organ morphogenesis;response to salt stress;establishment of protein …	-	-	-	receptor-like protein EIX1 [Brassica napus]	PF00560.37	Leucine Rich Repeat	Receptor-like protein EIX2 OS=Solanum lycopersicum OX=4081 GN=EIX2 PE=1 SV=2	3HQ0Y	S	Leucine rich repeat N-terminal domain	COG4886	Leucine-rich repeat (LRR) protein	K	Transcription	KOG0618	[T]	Signal transduction mechanisms;	Serine/threonine phosphatase 2C containing leucine-rich repeats, similar to SCN circadian oscillatory protein (SCOP)	-
BnaC04G0228400ZS	BnaC04G0228400ZS	3.17675	0.676234	2.58887e-05	0.00491151	nonsig	9.94238	9.37678	12.438	6.20806	6.46678	5.65778	1892	1569	1831	925	1266	972	GO:0043066;GO:0030174;GO:0006952;GO:0090597;GO:0007165;GO:0000776;GO:0003682;GO:0070210;GO:1900181;GO:0040011;GO:0005737;GO:0002230;GO:0070822;GO:0003713;GO:0002218;GO:0071333;GO:0009941;GO:0001701;GO:0043531;GO:0032991;GO:0000806;GO:0007049;GO:0006260;GO:0061629;GO:0031508;GO:0045786;GO:0010817;GO:0005721;GO:0001708;GO:1902459;GO:0030849;GO:0005730;GO:0044804;GO:0000805;GO:0000122;GO:0003723;GO:…	BP;BP;BP;BP;BP;CC;MF;CC;BP;BP;CC;BP;CC;MF;BP;BP;CC;BP;MF;CC;CC;BP;BP;MF;BP;BP;BP;CC;BP;BP;CC;CC;BP;CC;BP;MF;BP;BP;CC;MF;MF;BP;BP;BP;MF;BP;BP;CC;BP;BP;CC;MF;BP;BP;BP;CC;BP;MF;BP;CC;BP;BP;BP;BP;MF;BP;BP;CC;MF;BP;BP;CC;BP;CC;BP;CC;BP;BP;BP;BP;MF;BP;BP;BP;MF;CC;BP;CC;BP;BP;BP;BP;	negative regulation of apoptotic process;regulation of DNA-templated DNA replication initiation;defense response;nematode male tail mating organ morphogenesis;signal transduction;kinetochore;chromatin binding;Rpd3L-Expanded complex;negative regulation of protein localization to nucleus;locomotion;cytoplasm;positive regulation of defense response to virus by host;Sin3-type complex;transcription co…	K11644	-	-	PREDICTED: paired amphipathic helix protein Sin3-like 5 [Brassica oleracea var. oleracea]	PF16879.9	C-terminal domain of Sin3a protein	Paired amphipathic helix protein Sin3-like 5 OS=Arabidopsis thaliana OX=3702 GN=SNL5 PE=3 SV=3	3HVUB	B	Paired amphipathic helix protein Sin3-like	-	-	-	-	KOG4204	[B]	Chromatin structure and dynamics;	Histone deacetylase complex, SIN3 component	-
MSTRG.33871.4	MSTRG.33871.4	5.23041	-1.05484	2.58963e-05	0.00491151	down	25.7662	28.8306	24.5031	63.2218	44.1996	46.3586	1657	1630	1219	3183	2924	2691	GO:0032259;GO:0047763;GO:0009809;GO:0051555;GO:0030744;GO:0048354;GO:0009506;GO:0009536;GO:0010344;GO:0017096;GO:0046983;GO:0042343;GO:0006970;GO:0010555;GO:0006020;GO:0008757;GO:0042428;GO:0030187;GO:0007623;GO:0009759;GO:0005737;GO:0030755;GO:0090333;GO:1990110;GO:0008171;GO:0008168;GO:0005634;GO:0031537;GO:0005829;GO:0033799;GO:0030787;GO:0102822;	BP;MF;BP;BP;MF;BP;CC;CC;BP;MF;MF;BP;BP;BP;BP;MF;BP;BP;BP;BP;CC;MF;BP;BP;MF;MF;CC;BP;CC;MF;MF;MF;	methylation;caffeate O-methyltransferase activity;lignin biosynthetic process;flavonol biosynthetic process;obsolete luteolin O-methyltransferase activity;mucilage biosynthetic process involved in seed coat development;plasmodesma;plastid;seed oilbody biogenesis;acetylserotonin O-methyltransferase activity;protein dimerization activity;indole glucosinolate metabolic process;response to osmotic st…	-	-	-	indole glucosinolate O-methyltransferase 1-like [Brassica napus]	PF00891.22	O-methyltransferase domain	Indole glucosinolate O-methyltransferase 2 OS=Arabidopsis thaliana OX=3702 GN=IGMT2 PE=2 SV=1	37KI2	L	Belongs to the class I-like SAM-binding methyltransferase superfamily. Cation-independent O- methyltransferase family	COG2813	16S rRNA G1207 methylase RsmC	J	Translation, ribosomal structure and biogenesis	KOG3178	[R]	General function prediction only;	Hydroxyindole-O-methyltransferase and related SAM-dependent methyltransferases	-
BnaC06G0436700ZS	BnaC06G0436700ZS	0.904272	-1.73746	2.62408e-05	0.00495442	down	0.355116	0.467535	0.567049	1.88082	1.7232	0.758068	38	44	47	157	188	73	GO:0070062;GO:0050892;GO:0019531;GO:0002062;GO:0051453;GO:0060081;GO:0032880;GO:0010628;GO:0160044;GO:0019001;GO:0055085;GO:0005253;GO:0070633;GO:0005737;GO:0006821;GO:0016323;GO:0009410;GO:0099129;GO:0097225;GO:0015108;GO:0140900;GO:0055038;GO:0005794;GO:0015755;GO:0015562;GO:0009507;GO:0015111;GO:0000139;GO:0071320;GO:0097227;GO:0030659;GO:0015705;GO:0012506;GO:0006820;GO:0009877;GO:0042803;GO:…	CC;BP;MF;BP;BP;BP;BP;BP;MF;MF;BP;MF;BP;CC;BP;CC;BP;BP;CC;MF;MF;CC;CC;BP;MF;CC;MF;CC;BP;CC;CC;BP;CC;BP;BP;MF;MF;CC;MF;BP;BP;BP;BP;BP;BP;MF;BP;BP;BP;BP;BP;BP;BP;BP;CC;CC;BP;BP;BP;MF;MF;BP;BP;MF;BP;BP;CC;BP;BP;CC;BP;MF;CC;BP;MF;BP;BP;BP;BP;CC;BP;BP;MF;CC;BP;MF;BP;CC;BP;CC;BP;MF;BP;CC;BP;MF;BP;CC;BP;CC;BP;BP;MF;MF;BP;MF;MF;CC;MF;MF;MF;CC;CC;MF;CC;BP;MF;BP;BP;CC;BP;BP;BP;BP;BP;BP;MF;BP;BP;CC;CC;BP;	extracellular exosome;intestinal absorption;oxalate transmembrane transporter activity;chondrocyte differentiation;regulation of intracellular pH;membrane hyperpolarization;regulation of protein localization;positive regulation of gene expression;sulfate:chloride antiporter activity;guanyl nucleotide binding;transmembrane transport;monoatomic anion channel activity;transepithelial transport;cytop…	K17470	-	-	sulfate transporter 1.2 [Brassica napus]	PF00916.24	Sulfate permease family	Sulfate transporter 1.2 OS=Arabidopsis thaliana OX=3702 GN=SULTR1;2 PE=1 SV=1	3HZKG	P	sulfate transporter	COG0659	Sulfate permease or related transporter, MFS superfamily	P	Inorganic ion transport and metabolism	KOG0236	[P]	Inorganic ion transport and metabolism;	Sulfate/bicarbonate/oxalate exchanger SAT-1 and related transporters (SLC26 family)	-
BnaA01G0025400ZS	BnaA01G0025400ZS	6.01568	1.27579	2.65052e-05	0.0049657	up	77.2115	107.822	131.578	29.4782	48.9351	41.7107	1740	2136	2294	521	1135	849	GO:0070062;GO:0098793;GO:0009295;GO:0090084;GO:0030433;GO:0009535;GO:0010322;GO:0032880;GO:0070050;GO:0140036;GO:0043130;GO:0005737;GO:0007268;GO:0061077;GO:0008285;GO:0002221;GO:0036503;GO:0001671;GO:0005794;GO:0009941;GO:0009408;GO:0032436;GO:0090086;GO:0030544;GO:0006260;GO:0031625;GO:0035577;GO:0030018;GO:0009536;GO:0009507;GO:0031594;GO:0051787;GO:0000502;GO:0035579;GO:0008284;GO:0032091;GO:…	CC;CC;CC;BP;BP;CC;BP;BP;BP;MF;MF;CC;BP;BP;BP;BP;BP;MF;CC;CC;BP;BP;BP;MF;BP;MF;CC;CC;CC;CC;CC;MF;CC;CC;BP;BP;CC;MF;CC;MF;BP;BP;CC;CC;MF;CC;BP;CC;BP;BP;BP;MF;MF;CC;BP;CC;BP;MF;BP;BP;CC;CC;CC;CC;CC;CC;BP;CC;MF;MF;MF;MF;CC;CC;CC;CC;BP;BP;BP;BP;CC;CC;MF;BP;BP;CC;CC;BP;CC;MF;CC;BP;	extracellular exosome;presynapse;nucleoid;negative regulation of inclusion body assembly;obsolete ubiquitin-dependent ERAD pathway;chloroplast thylakoid membrane;regulation of isopentenyl diphosphate biosynthetic process, methylerythritol 4-phosphate pathway;regulation of protein localization;neuron cellular homeostasis;ubiquitin-modified protein reader activity;ubiquitin binding;cytoplasm;chemic…	-	-	-	chaperone protein dnaJ 11, chloroplastic-like [Brassica napus]	PF00226.35	DnaJ domain	Chaperone protein dnaJ 11, chloroplastic OS=Arabidopsis thaliana OX=3702 GN=ATJ11 PE=1 SV=2	3I08K	O	DNAJ heat shock N-terminal domain-containing protein	COG0484	DnaJ-class molecular chaperone with C-terminal Zn finger domain	O	Posttranslational modification, protein turnover, chaperones	KOG0712	[O]	Posttranslational modification, protein turnover, chaperones;	Molecular chaperone (DnaJ superfamily)	-
BnaA07G0381600ZS	BnaA07G0381600ZS	1.08164	1.40249	2.65761e-05	0.0049657	up	2.01675	1.35707	1.97357	0.740389	0.559843	0.565736	126	75	96	37	36	32	GO:0070063;GO:0031124;GO:0002376;GO:0001556;GO:0003730;GO:0070555;GO:0035770;GO:0005737;GO:0043488;GO:0043022;GO:0003729;GO:0005516;GO:0036464;GO:1902667;GO:0019220;GO:0001701;GO:0045746;GO:0030155;GO:0007049;GO:2000232;GO:0006406;GO:0034451;GO:0045087;GO:0048024;GO:0007530;GO:0003723;GO:0048598;GO:0034052;GO:0000381;GO:0009626;GO:1901163;GO:0060339;GO:0005847;GO:0061157;GO:0034612;GO:0050767;GO:…	MF;BP;BP;BP;MF;BP;CC;CC;BP;MF;MF;MF;CC;BP;BP;BP;BP;BP;BP;BP;BP;CC;BP;BP;BP;MF;BP;BP;BP;BP;BP;BP;CC;BP;BP;BP;MF;MF;BP;BP;BP;MF;CC;CC;BP;BP;BP;BP;BP;BP;BP;BP;BP;BP;BP;BP;CC;BP;BP;BP;CC;MF;MF;BP;BP;BP;CC;BP;BP;BP;CC;BP;MF;MF;BP;CC;BP;BP;BP;MF;MF;CC;BP;BP;MF;MF;BP;CC;BP;CC;BP;BP;BP;BP;BP;MF;BP;BP;	RNA polymerase binding;mRNA 3'-end processing;immune system process;oocyte maturation;mRNA 3'-UTR binding;response to interleukin-1;ribonucleoprotein granule;cytoplasm;regulation of mRNA stability;ribosome binding;mRNA binding;calmodulin binding;cytoplasmic ribonucleoprotein granule;regulation of axon guidance;regulation of phosphate metabolic process;in utero embryonic development;negative regul…	K20102	-	-	YTH domain-containing protein ECT2-like isoform X1 [Brassica napus]	PF04146.19	YT521-B-like domain	YTH domain-containing protein ECT2 OS=Arabidopsis thaliana OX=3702 GN=ECT2 PE=1 SV=1	3HY4T	S	evolutionarily conserved C-terminal region 8	-	-	-	-	KOG1901	[R]	General function prediction only;	Uncharacterized high-glucose-regulated protein	-
BnaC01G0492300ZS	BnaC01G0492300ZS	1.95537	-2.21853	2.66559e-05	0.0049657	down	1.01026	1.60212	1.5433	6.11285	2.52913	9.18745	39	54	46	181	99	314	GO:0009788;GO:0009651;GO:0045892;GO:0009867;GO:0005634;GO:0010581;GO:0009738;GO:0009753;GO:0009414;GO:0006952;GO:1901371;GO:0007165;GO:0009737;	BP;BP;BP;BP;CC;BP;BP;BP;BP;BP;BP;BP;BP;	negative regulation of abscisic acid-activated signaling pathway;response to salt stress;negative regulation of DNA-templated transcription;jasmonic acid mediated signaling pathway;nucleus;regulation of starch biosynthetic process;abscisic acid-activated signaling pathway;response to jasmonic acid;response to water deprivation;defense response;regulation of leaf morphogenesis;signal transduction;…	-	-	-	ninja-family protein AFP3 [Brassica rapa]	PF07897.15	Ethylene-responsive binding factor-associated repression	Ninja-family protein AFP3 OS=Arabidopsis thaliana OX=3702 GN=AFP3 PE=1 SV=1	3GB3S	S	Ninja-family protein	-	-	-	-	-	-	-	-	-
BnaC09G0575800ZS	BnaC09G0575800ZS	3.48609	1.85848	2.67871e-05	0.00496805	up	25.66	22.752	13.175	3.37971	8.23411	4.45238	625	488	249	65	207	98	-	-	-	-	-	-	uncharacterized protein LOC106446080 [Brassica napus]	PF06522.15	NADH-ubiquinone reductase complex 1 MLRQ subunit	-	3HUVE	-	-	-	-	-	-	-	-	-	-	-
BnaA09G0044400ZS	BnaA09G0044400ZS	1.42095	1.87804	2.69683e-05	0.00497962	up	3.46059	2.10986	3.95028	0.449715	0.743811	1.12299	144	77	127	15	32	42	GO:0005829;	CC;	cytosol;	K07735	-	-	UPF0301 protein Plut_0637-like [Brassica napus]	PF02622.19	Uncharacterized ACR, COG1678	UPF0301 protein Plut_0637 OS=Chlorobium luteolum (strain DSM 273 / BCRC 81028 / 2530) OX=319225 GN=Plut_0637 PE=3 SV=1	3GX93	K	Uncharacterized ACR, COG1678	COG1678	Putative transcriptional regulator, AlgH/UPF0301 family	K	Transcription	-	-	-	-	-
MSTRG.15271.1	MSTRG.15271.1	0.674581	1.88835	2.75276e-05	0.00505544	up	1.56677	0.766299	0.811285	0.248094	0.321338	0.220997	157	68	63	20	33	20	GO:0015145;GO:0071333;GO:0012505;GO:0009506;GO:0015749;GO:0015578;GO:0009536;GO:0009414;GO:0042900;GO:0055055;GO:0042882;GO:0005358;GO:0008645;GO:0009679;GO:0009651;GO:0005886;GO:0090406;GO:0016020;GO:0015293;GO:0009737;GO:0005354;	MF;BP;CC;CC;BP;MF;CC;BP;MF;MF;BP;MF;BP;MF;BP;CC;CC;CC;MF;BP;MF;	monosaccharide transmembrane transporter activity;cellular response to glucose stimulus;endomembrane system;plasmodesma;monosaccharide transmembrane transport;mannose transmembrane transporter activity;plastid;response to water deprivation;arabinose transmembrane transporter activity;obsolete glucose:proton symporter activity;L-arabinose transmembrane transport;high-affinity D-glucose:proton symp…	-	-	-	sugar transport protein 7 [Brassica napus]	PF00083.28	Sugar (and other) transporter	Sugar transport protein 7 OS=Arabidopsis thaliana OX=3702 GN=STP7 PE=1 SV=1	3HTCX	U	Belongs to the major facilitator superfamily. Sugar transporter (TC 2.A.1.1) family	COG2814	Predicted arabinose efflux permease AraJ, MFS family	G	Carbohydrate transport and metabolism	KOG0254	[R]	General function prediction only;	Predicted transporter (major facilitator superfamily)	-
BnaA02G0123500ZS	BnaA02G0123500ZS	3.00495	-1.37874	2.76948e-05	0.00505544	down	3.36537	6.02384	4.08807	10.154	11.7841	11.0289	120	189	113	283	431	354	GO:0016020;GO:0009828;GO:0009635;GO:0080022;GO:0006949;GO:0048767;GO:0071555;GO:0005794;GO:0009505;GO:0009739;GO:0009653;GO:0009664;GO:0099503;GO:0009826;GO:0009506;GO:0010311;GO:0010114;GO:0005576;GO:0019953;	CC;BP;BP;BP;BP;BP;BP;CC;CC;BP;BP;BP;CC;BP;CC;BP;BP;CC;BP;	membrane;plant-type cell wall loosening;response to herbicide;primary root development;syncytium formation;root hair elongation;cell wall organization;Golgi apparatus;plant-type cell wall;response to gibberellin;anatomical structure morphogenesis;plant-type cell wall organization;secretory vesicle;unidimensional cell growth;plasmodesma;lateral root formation;response to red light;extracellular re…	-	-	-	expansin-A14 [Brassica napus]	PF01357.25	Expansin C-terminal domain	Expansin-A14 OS=Arabidopsis thaliana OX=3702 GN=EXPA14 PE=2 SV=1	3HYSH	S	Rare lipoprotein A (RlpA)-like double-psi beta-barrel	-	-	-	-	-	-	-	-	-
BnaC07G0079300ZS	BnaC07G0079300ZS	1.72423	-1.82732	2.77407e-05	0.00505544	down	1.27026	1.27478	1.12168	5.61091	4.82358	2.08405	40	35	27	136	153	58	-	-	-	-	-	-	disease resistance protein RRS1B-like [Brassica napus]	PF10796.13	Sigma-S stabilisation anti-adaptor protein	-	-	-	-	-	-	-	-	-	-	-	-	-
BnaA03G0269700ZS	BnaA03G0269700ZS	4.1372	1.16269	2.93385e-05	0.00531272	up	31.3359	21.2345	25.4501	8.83271	13.239	10.1492	579	345	364	128	252	170	-	-	-	-	-	-	dormancy-associated protein homolog 3 isoform X2 [Brassica napus]	PF05564.16	Dormancy/auxin associated protein	Dormancy-associated protein homolog 3 OS=Arabidopsis thaliana OX=3702 GN=At1g56220 PE=1 SV=1	3I0PY	S	Dormancy/auxin associated protein	-	-	-	-	-	-	-	-	-
MSTRG.73602.6	MSTRG.73602.6	5.63471	1.48336	2.94059e-05	0.00531272	up	49.1307	81.2593	136.349	29.4334	33.333	24.4169	3220	4683	6914	1511	2248	1445	GO:0016491;GO:0070401;GO:1990641;GO:0019290;GO:0009507;GO:0009651;GO:0009414;GO:0016229;GO:0034224;GO:0009409;GO:0005783;GO:0008106;GO:0004032;GO:0033707;GO:0004033;GO:0009636;GO:0005829;	MF;MF;BP;BP;CC;BP;BP;MF;BP;BP;CC;MF;MF;MF;MF;BP;CC;	oxidoreductase activity;NADP+ binding;response to iron ion starvation;siderophore biosynthetic process;chloroplast;response to salt stress;response to water deprivation;steroid dehydrogenase activity;cellular response to zinc ion starvation;response to cold;endoplasmic reticulum;alcohol dehydrogenase (NADP+) activity;aldose reductase (NADPH) activity;3''-deamino-3''-oxonicotianamine reductase act…	-	bna00010;bna00561;bna01110;bna01100;bna00040	Glycolysis / Gluconeogenesis;Glycerolipid metabolism;Biosynthesis of secondary metabolites;Metabolic pathways;Pentose and glucuronate interconversions	PREDICTED: aldo-keto reductase family 4 member C8 [Brassica oleracea var. oleracea]	PF00248.25	Aldo/keto reductase family	Aldo-keto reductase family 4 member C8 OS=Arabidopsis thaliana OX=3702 GN=AKR4C8 PE=1 SV=2	3HZTB	S	Aldo/keto reductase family	COG0656	Aldo/keto reductase, related to diketogulonate reductase	Q	Secondary metabolites biosynthesis, transport and catabolism	KOG1577	[R]	General function prediction only;	Aldo/keto reductase family proteins	-
BnaA03G0354500ZS	BnaA03G0354500ZS	2.73492	-2.25622	2.97576e-05	0.00535317	down	2.66499	0.973719	5.05809	10.5462	10.7708	13.6155	233	62	365	770	1033	1144	GO:0016310;GO:0042548;GO:0006225;GO:0043621;GO:0009658;GO:0003723;GO:0031425;GO:0009507;GO:0005829;GO:1990825;GO:0005524;GO:0044210;GO:0009570;GO:0005737;GO:0009416;GO:0033862;	BP;BP;BP;MF;BP;MF;BP;CC;CC;MF;MF;BP;CC;CC;BP;MF;	phosphorylation;regulation of photosynthesis, light reaction;UDP biosynthetic process;obsolete protein self-association;chloroplast organization;RNA binding;chloroplast RNA processing;chloroplast;cytosol;sequence-specific mRNA binding;ATP binding;'de novo' CTP biosynthetic process;chloroplast stroma;cytoplasm;response to light stimulus;UMP kinase activity;	K09903	ko01100;ko00240	Metabolic pathways;Pyrimidine metabolism	uridylate kinase-like [Brassica napus]	PF00696.32	Amino acid kinase family	Uridylate kinase PUMPKIN, chloroplastic OS=Arabidopsis thaliana OX=3702 GN=PUMPKIN PE=1 SV=1	3HN1X	F	Aspartate glutamate uridylate kinase family protein	COG0528	Uridylate kinase	F	Nucleotide transport and metabolism	-	-	-	-	-
BnaC07G0079200ZS	BnaC07G0079200ZS	1.91971	-2.14399	3.04823e-05	0.0054601	down	0.98034	2.2632	0.649059	5.01682	5.45481	6.08725	37	75	19	147	210	206	GO:0010193;GO:0016887;GO:0005634;GO:0000325;GO:0006952;GO:0005739;GO:0009409;GO:0007165;GO:0050135;GO:0071456;GO:0005737;GO:0009626;GO:0046872;GO:0042802;GO:0003700;GO:0043565;GO:0016310;GO:0002758;GO:0009941;GO:0004674;GO:0043531;GO:0042742;GO:0061809;GO:0005524;	BP;MF;CC;CC;BP;CC;BP;BP;MF;BP;CC;BP;MF;MF;MF;MF;BP;BP;CC;MF;MF;BP;MF;MF;	response to ozone;ATP hydrolysis activity;nucleus;plant-type vacuole;defense response;mitochondrion;response to cold;signal transduction;NADP+ nucleosidase activity;cellular response to hypoxia;cytoplasm;plant-type hypersensitive response;metal ion binding;identical protein binding;DNA-binding transcription factor activity;sequence-specific DNA binding;phosphorylation;innate immune response-activ…	-	-	-	probable disease resistance protein At4g19520 [Brassica napus]	PF13173.10	AAA domain	Disease resistance protein RRS1B OS=Arabidopsis thaliana OX=3702 GN=RRS1B PE=1 SV=1	-	-	-	-	-	-	-	-	-	-	-	-
BnaC06G0058800ZS	BnaC06G0058800ZS	1.43808	-1.5343	3.06761e-05	0.00547143	down	0.848336	0.625044	1.63462	3.41129	2.69851	2.0653	113	73	168	355	369	248	GO:0043621;GO:0016887;GO:0016045;GO:0005634;GO:0009536;GO:0006952;GO:0050776;GO:0051707;GO:0048046;GO:0005739;GO:0016301;GO:0004016;GO:0012505;GO:0007165;GO:0050135;GO:0009637;GO:0060271;GO:0009751;GO:0000166;GO:0005525;GO:0051607;GO:0007166;GO:0009620;GO:0042803;GO:0005886;GO:0040011;GO:0005737;GO:0009626;GO:0050832;GO:0009416;GO:0019677;GO:0002230;GO:0009506;GO:0042802;GO:0046872;GO:0002229;GO:…	MF;MF;BP;CC;CC;BP;BP;BP;CC;CC;MF;MF;CC;BP;MF;BP;BP;BP;MF;MF;BP;BP;BP;MF;CC;BP;CC;BP;BP;BP;BP;BP;CC;MF;MF;BP;BP;MF;BP;BP;CC;BP;MF;CC;BP;BP;BP;CC;BP;BP;MF;BP;CC;BP;MF;BP;MF;BP;BP;CC;BP;MF;MF;	obsolete protein self-association;ATP hydrolysis activity;detection of bacterium;nucleus;plastid;defense response;regulation of immune response;response to other organism;apoplast;mitochondrion;kinase activity;adenylate cyclase activity;endomembrane system;signal transduction;NADP+ nucleosidase activity;response to blue light;cilium assembly;response to salicylic acid;nucleotide binding;GTP bindi…	-	-	-	probable disease resistance protein At1g15890 [Brassica napus]	PF00931.26	NB-ARC domain	Probable disease resistance protein At1g15890 OS=Arabidopsis thaliana OX=3702 GN=At1g15890 PE=3 SV=2	KOG4658	S	ADP binding	COG2319	WD40 repeat	R	General function prediction only	KOG4658	[T]	Signal transduction mechanisms;	Apoptotic ATPase	-
BnaA05G0498900ZS	BnaA05G0498900ZS	1.81189	1.27041	3.13575e-05	0.00556928	up	3.16526	3.16457	5.79494	1.58735	1.494	1.46294	202	178	287	80	99	85	GO:0005634;GO:0090627;GO:2000033;GO:0042335;GO:0043481;GO:0048825;GO:0010091;GO:0000976;GO:0010062;GO:0003677;GO:0048364;GO:0042803;GO:0000981;GO:0009911;GO:0008289;GO:0009913;GO:0048497;GO:0003700;GO:0010090;GO:0031047;GO:0043565;GO:0010029;GO:0009845;GO:0009827;GO:0030154;GO:0048765;GO:0009828;GO:0006723;	CC;BP;BP;BP;BP;BP;BP;MF;BP;MF;BP;MF;MF;BP;MF;BP;BP;MF;BP;BP;MF;BP;BP;BP;BP;BP;BP;BP;	nucleus;plant epidermal cell differentiation;regulation of seed dormancy process;cuticle development;anthocyanin accumulation in tissues in response to UV light;cotyledon development;trichome branching;transcription cis-regulatory region binding;negative regulation of trichoblast fate specification;DNA binding;root development;protein homodimerization activity;DNA-binding transcription factor act…	K09338	-	-	homeobox-leucine zipper protein HDG8 [Brassica rapa]	PF01852.23	START domain	Homeobox-leucine zipper protein HDG8 OS=Arabidopsis thaliana OX=3702 GN=HDG8 PE=1 SV=2	3GFGH	K	homeobox-leucine zipper protein	-	-	-	-	-	-	-	-	HB-other
MSTRG.37961.1	MSTRG.37961.1	3.30521	1.08387	3.16349e-05	0.00559484	up	12.6553	12.6467	15.1593	6.91787	4.42581	6.21066	807	709	748	346	291	358	GO:0005737;GO:0006970;GO:0003729;GO:0071472;GO:0009536;GO:0005777;GO:0009651;GO:0009787;GO:0071470;GO:0009737;GO:0005634;GO:0048471;GO:0005886;GO:0005829;GO:0006417;GO:0009738;	CC;BP;MF;BP;CC;CC;BP;BP;BP;BP;CC;CC;CC;CC;BP;BP;	cytoplasm;response to osmotic stress;mRNA binding;cellular response to salt stress;plastid;peroxisome;response to salt stress;regulation of abscisic acid-activated signaling pathway;cellular response to osmotic stress;response to abscisic acid;nucleus;perinuclear region of cytoplasm;plasma membrane;cytosol;regulation of translation;abscisic acid-activated signaling pathway;	-	-	-	RGG repeats nuclear RNA binding protein A isoform X1 [Brassica rapa]	PF09598.14	Stm1	RGG repeats nuclear RNA binding protein A OS=Arabidopsis thaliana OX=3702 GN=RGGA PE=1 SV=1	3HXRP	S	nuclear RNA-binding protein	-	-	-	-	KOG2945	[R]	General function prediction only;	Predicted RNA-binding protein	-
BnaC04G0341500ZS	BnaC04G0341500ZS	2.47008	-1.10458	3.20324e-05	0.00561968	down	3.3879	2.43369	3.88803	5.29525	7.77586	6.11129	217	137	193	266	512	353	GO:0009651;GO:0071456;GO:0005634;GO:0009507;GO:0010119;GO:0005516;GO:0009737;GO:0005737;	BP;BP;CC;CC;BP;MF;BP;CC;	response to salt stress;cellular response to hypoxia;nucleus;chloroplast;regulation of stomatal movement;calmodulin binding;response to abscisic acid;cytoplasm;	-	-	-	IQ domain-containing protein IQM3 isoform X1 [Brassica napus]	PF00612.31	IQ calmodulin-binding motif	IQ domain-containing protein IQM3 OS=Arabidopsis thaliana OX=3702 GN=IQM3 PE=2 SV=1	3HT8F	-	-	COG3209	Uncharacterized conserved protein RhaS, contains 28 RHS repeats	R	General function prediction only	-	-	-	-	-
MSTRG.62913.5	MSTRG.62913.5	0.235671	-2.05029	3.20435e-05	0.00561968	down	0.083334	0.04007	0.096167	0.34429	0.26151	0.27227	13	6	12	41	41	38	GO:0009506;GO:0045893;GO:0009585;GO:1900056;GO:0042753;GO:0008270;GO:0009639;GO:0010018;GO:0010017;GO:0010218;GO:0005634;GO:0007623;GO:0003700;GO:0006355;GO:0001228;	CC;BP;BP;BP;BP;MF;BP;BP;BP;BP;CC;BP;MF;BP;MF;	plasmodesma;positive regulation of DNA-templated transcription;red, far-red light phototransduction;negative regulation of leaf senescence;positive regulation of circadian rhythm;zinc ion binding;response to red or far red light;far-red light signaling pathway;red or far-red light signaling pathway;response to far red light;nucleus;circadian rhythm;DNA-binding transcription factor activity;regula…	-	-	-	putative protein FAR1-RELATED SEQUENCE 10 [Brassica napus]	PF03101.19	FAR1 DNA-binding domain	Putative protein FAR1-RELATED SEQUENCE 10 OS=Arabidopsis thaliana OX=3702 GN=FRS10 PE=2 SV=2	3GBQ3	S	protein FAR1-RELATED SEQUENCE	-	-	-	-	-	-	-	-	-
MSTRG.65870.8	MSTRG.65870.8	0.195857	-2.64704	3.23615e-05	0.00562928	down	0.020653	0.01505	0.099842	0.224263	0.359931	0.190326	8	6	30	67	141	66	GO:0005737;GO:0003677;GO:0032197;GO:0006508;GO:0006310;GO:0004523;GO:0008270;GO:0015074;GO:0008233;GO:0000943;GO:0003723;GO:0004190;GO:0003887;GO:0005634;GO:0003964;GO:0004519;GO:0046872;GO:0004540;GO:0005524;	CC;MF;BP;BP;BP;MF;MF;BP;MF;CC;MF;MF;MF;CC;MF;MF;MF;MF;MF;	cytoplasm;DNA binding;retrotransposition;proteolysis;DNA recombination;RNA-DNA hybrid ribonuclease activity;zinc ion binding;DNA integration;peptidase activity;retrotransposon nucleocapsid;RNA binding;aspartic-type endopeptidase activity;DNA-directed DNA polymerase activity;nucleus;RNA-directed DNA polymerase activity;endonuclease activity;metal ion binding;RNA nuclease activity;ATP binding;	-	-	-	uncharacterized protein LOC108827423 [Raphanus sativus]	PF00078.31	Reverse transcriptase (RNA-dependent DNA polymerase)	Transposon Ty3-G Gag-Pol polyprotein OS=Saccharomyces cerevisiae (strain ATCC 204508 / S288c) OX=559292 GN=TY3B-G PE=1 SV=3	3HVTZ	L	DNA RNA polymerases superfamily protein	-	-	-	-	KOG0016	[I]	Lipid transport and metabolism;	Enoyl-CoA hydratase/isomerase	-
BnaA03G0463000ZS	BnaA03G0463000ZS	1.99801	-0.941779	3.24729e-05	0.00562928	nonsig	2.41123	1.95524	2.29471	4.30033	3.73017	3.87831	172	123	127	240	273	249	GO:0010023;GO:0015562;GO:2000070;GO:0005634;GO:0009536;GO:0009507;GO:1990961;GO:0042908;GO:0000139;GO:0000329;GO:0000325;GO:0006952;GO:0071244;GO:0031982;GO:0005778;GO:0005770;GO:0006811;GO:0022857;GO:0006826;GO:1905428;GO:0015179;GO:0010600;GO:0042910;GO:0009624;GO:0090440;GO:0005774;GO:0005802;GO:0010015;GO:0015234;GO:0006814;GO:0046620;GO:0031902;GO:0006970;GO:0009813;GO:0009705;GO:0080168;GO:…	BP;MF;BP;CC;CC;CC;BP;BP;CC;CC;CC;BP;BP;CC;CC;CC;BP;MF;BP;BP;MF;BP;MF;BP;MF;CC;CC;BP;MF;BP;BP;CC;BP;BP;CC;BP;CC;BP;BP;BP;BP;BP;BP;BP;MF;CC;MF;CC;BP;BP;CC;BP;BP;MF;BP;BP;MF;BP;CC;BP;CC;BP;BP;CC;BP;BP;CC;BP;CC;BP;MF;BP;BP;BP;CC;MF;BP;MF;CC;	proanthocyanidin biosynthetic process;efflux transmembrane transporter activity;regulation of response to water deprivation;nucleus;plastid;chloroplast;xenobiotic detoxification by transmembrane export across the plasma membrane;xenobiotic transport;Golgi membrane;fungal-type vacuole membrane;plant-type vacuole;defense response;cellular response to carbon dioxide;vesicle;peroxisomal membrane;late…	K03327	-	-	protein DETOXIFICATION 39-like [Brassica napus]	PF01554.22	MatE	Protein DETOXIFICATION 39 OS=Arabidopsis thaliana OX=3702 GN=DTX39 PE=2 SV=1	3HZHQ	V	Belongs to the multi antimicrobial extrusion (MATE) (TC 2.A.66.1) family	COG0534	Na+-driven multidrug efflux pump, DinF/NorM/MATE family	V	Defense mechanisms	KOG1347	[R]	General function prediction only;	Uncharacterized membrane protein, predicted efflux pump	-
BnaC06G0373500ZS	BnaC06G0373500ZS	1.32587	-1.42998	3.25012e-05	0.00562928	down	0.763782	1.09726	0.856864	2.47437	2.62386	1.86968	35	44	30	87	121	76	GO:0010193;GO:0006468;GO:0000325;GO:0006952;GO:0051707;GO:0003779;GO:0005739;GO:0048046;GO:0016301;GO:0099503;GO:0004672;GO:0005537;GO:0052545;GO:0009751;GO:0005886;GO:0046777;GO:0009626;GO:0050832;GO:0019828;GO:0012501;GO:0010497;GO:0000302;GO:0009506;GO:0106310;GO:0046739;GO:0005829;GO:0009737;GO:0005576;GO:0016310;GO:0016020;GO:0005615;GO:0004674;GO:0009505;GO:0042742;GO:0002237;GO:0005524;GO:…	BP;BP;CC;BP;BP;MF;CC;CC;MF;CC;MF;MF;BP;BP;CC;BP;BP;BP;MF;BP;BP;BP;CC;MF;BP;CC;BP;CC;BP;CC;CC;MF;CC;BP;BP;MF;BP;BP;BP;BP;	response to ozone;protein phosphorylation;plant-type vacuole;defense response;response to other organism;actin binding;mitochondrion;apoplast;kinase activity;secretory vesicle;protein kinase activity;D-mannose binding;callose localization;response to salicylic acid;plasma membrane;protein autophosphorylation;plant-type hypersensitive response;defense response to fungus;aspartic-type endopeptidase…	-	-	-	plasmodesmata-located protein 5-like isoform X1 [Brassica napus]	PF01657.21	Salt stress response/antifungal	Plasmodesmata-located protein 5 OS=Arabidopsis thaliana OX=3702 GN=PDLP5 PE=1 SV=1	3GGUF	S	cysteine-rich repeat secretory protein	-	-	-	-	-	-	-	-	-
BnaA09G0197300ZS	BnaA09G0197300ZS	4.77568	-1.06516	3.30452e-05	0.00569995	down	17.3995	14.4584	26.4107	43.1778	33.0185	35.0521	755	552	887	1467	1474	1373	GO:0051410;GO:0003824;GO:0043546;GO:0018315;GO:0008152;GO:0005739;GO:0051537;GO:0016829;GO:0009409;GO:0032787;GO:0016491;GO:0009749;GO:0006809;GO:0009651;GO:0030170;GO:0009000;GO:0006970;GO:0009407;GO:0070458;GO:0009734;GO:0010118;GO:0045037;GO:0010182;GO:0043545;GO:0009688;GO:1903958;GO:0050421;GO:0005829;GO:0005777;GO:0102867;GO:0008265;GO:0098809;GO:0006777;GO:0042126;GO:0042742;GO:0006727;GO:…	BP;MF;MF;BP;BP;CC;MF;MF;BP;BP;MF;BP;BP;BP;MF;MF;BP;BP;BP;BP;BP;BP;BP;BP;BP;CC;MF;CC;CC;MF;MF;MF;BP;BP;BP;BP;BP;CC;MF;BP;MF;MF;BP;CC;	detoxification of nitrogen compound;catalytic activity;molybdopterin cofactor binding;molybdenum incorporation into molybdenum-molybdopterin complex;metabolic process;mitochondrion;2 iron, 2 sulfur cluster binding;lyase activity;response to cold;monocarboxylic acid metabolic process;oxidoreductase activity;response to glucose;nitric oxide biosynthetic process;response to salt stress;pyridoxal pho…	-	-	-	mitochondrial amidoxime reducing component 2 [Brassica napus]	PF03476.20	MOSC N-terminal beta barrel domain	Mitochondrial amidoxime reducing component 2 OS=Rattus norvegicus OX=10116 GN=Mtarc2 PE=2 SV=1	3HW09	S	molybdenum cofactor sulfurase family protein	COG3217	N-hydroxylaminopurine reductase subunit YcbX, contains MOSC domain	FV	-	KOG2362	[R]	General function prediction only;	Uncharacterized Fe-S protein	-
BnaC08G0191000ZS	BnaC08G0191000ZS	2.77792	-1.82573	3.49924e-05	0.00601109	down	2.82815	4.77526	2.05443	14.563	7.6753	10.4169	115	170	65	462	320	381	GO:0005634;GO:0032784;GO:0006357;GO:0140673;GO:0006397;GO:0060320;GO:0005576;	CC;BP;BP;BP;BP;BP;CC;	nucleus;regulation of DNA-templated transcription elongation;regulation of transcription by RNA polymerase II;transcription elongation-coupled chromatin remodeling;mRNA processing;rejection of self pollen;extracellular region;	-	-	-	S-protein homolog 5 [Brassica napus]	PF05938.15	Plant self-incompatibility protein S1	S-protein homolog 5 OS=Arabidopsis thaliana OX=3702 GN=SPH5 PE=2 SV=1	-	-	-	-	-	-	-	-	-	-	-	-
BnaC09G0563900ZS	BnaC09G0563900ZS	1.97357	-1.51685	3.51797e-05	0.0060186	down	1.85762	1.82567	1.50125	5.29504	4.10599	4.65271	32	28	20	71	72	72	GO:0070062;GO:0007417;GO:0046292;GO:0018479;GO:0006714;GO:0005634;GO:0009536;GO:0009507;GO:0006805;GO:0018477;GO:0000325;GO:0043878;GO:0052814;GO:0031982;GO:0005778;GO:0046185;GO:0006631;GO:0005739;GO:0004029;GO:0005811;GO:0014070;GO:0009651;GO:0030667;GO:0008544;GO:0006979;GO:0001666;GO:0008106;GO:0033306;GO:0051591;GO:0035579;GO:0016620;GO:0004030;GO:0009269;GO:0008284;GO:0042803;GO:0005886;GO:…	CC;BP;BP;MF;BP;CC;CC;CC;BP;MF;CC;MF;MF;CC;CC;BP;BP;CC;MF;CC;BP;BP;CC;BP;BP;BP;MF;BP;BP;CC;MF;MF;BP;BP;MF;CC;CC;CC;BP;CC;BP;BP;BP;BP;MF;BP;BP;BP;MF;CC;BP;CC;BP;BP;CC;CC;CC;BP;BP;CC;CC;CC;MF;BP;MF;BP;CC;CC;	extracellular exosome;central nervous system development;formaldehyde metabolic process;benzaldehyde dehydrogenase (NAD+) activity;sesquiterpenoid metabolic process;nucleus;plastid;chloroplast;xenobiotic metabolic process;benzaldehyde dehydrogenase (NADP+) activity;plant-type vacuole;glyceraldehyde-3-phosphate dehydrogenase (NAD+) (non-phosphorylating) activity;medium-chain fatty aldehyde dehydro…	K00128	ko00410;ko00010;ko00620;ko00071;ko00310;ko01110;ko00330;ko00380;ko00561;ko01100;ko00903;ko00340;ko00053;ko00280	beta-Alanine metabolism;Glycolysis / Gluconeogenesis;Pyruvate metabolism;Fatty acid degradation;Lysine degradation;Biosynthesis of secondary metabolites;Arginine and proline metabolism;Tryptophan metabolism;Glycerolipid metabolism;Metabolic pathways;Limonene degradation;Histidine metabolism;Ascorbate and aldarate metabolism;Valine, leucine and isoleucine degradation	aldehyde dehydrogenase family 3 member F1-like [Brassica napus]	PF00171.26	Aldehyde dehydrogenase family	Aldehyde dehydrogenase family 3 member F1 OS=Arabidopsis thaliana OX=3702 GN=ALDH3F1 PE=2 SV=2	3HPFE	C	Belongs to the aldehyde dehydrogenase family	COG1012	Acyl-CoA reductase or other NAD-dependent aldehyde dehydrogenase	I	Lipid transport and metabolism	KOG2456	[C]	Energy production and conversion;	Aldehyde dehydrogenase	-
BnaA10G0193000ZS	BnaA10G0193000ZS	2.15478	-1.49105	3.54421e-05	0.00603884	down	1.78655	1.95293	2.62497	7.2485	4.14989	5.15344	38	37	43	120	91	99	-	-	-	-	-	-	PREDICTED: spore coat protein YeeK [Brassica oleracea var. oleracea]	PF09849.13	Uncharacterized protein conserved in bacteria (DUF2076)	-	3I0N5	S	glycine-rich protein	-	-	-	-	-	-	-	-	-
BnaA06G0130400ZS	BnaA06G0130400ZS	1.8279	-1.52401	3.59752e-05	0.00610485	down	1.4878	1.52698	1.57153	3.68036	3.14603	5.38251	54	49	44	104	116	175	GO:0006260;GO:0045892;GO:0071480;GO:0004864;GO:0005634;GO:0019899;GO:0045786;GO:0046662;GO:0005654;GO:0019888;GO:0051897;GO:0005811;GO:0051262;GO:0030308;GO:0005730;GO:0003682;GO:0009966;GO:0048471;GO:0007283;GO:0045944;GO:0007049;GO:0006337;GO:0003677;GO:0008284;GO:0007548;GO:0000182;GO:0007506;GO:0005737;GO:0045446;GO:0000785;GO:0005829;GO:0031398;GO:0016444;GO:0045859;GO:0005783;GO:0030154;GO:…	BP;BP;BP;MF;CC;MF;BP;BP;CC;MF;BP;CC;BP;BP;CC;MF;BP;CC;BP;BP;BP;BP;MF;BP;BP;MF;BP;CC;BP;CC;CC;BP;BP;BP;CC;BP;BP;BP;BP;CC;BP;MF;BP;	DNA replication;negative regulation of DNA-templated transcription;cellular response to gamma radiation;protein phosphatase inhibitor activity;nucleus;enzyme binding;negative regulation of cell cycle;regulation of egg-laying behavior;nucleoplasm;protein phosphatase regulator activity;positive regulation of phosphatidylinositol 3-kinase/protein kinase B signal transduction;lipid droplet;protein te…	K11290	-	-	NAP1-related protein 2 isoform X1 [Brassica napus]	PF00956.22	Nucleosome assembly protein (NAP)	NAP1-related protein 2 OS=Arabidopsis thaliana OX=3702 GN=NRP2 PE=1 SV=2	3HN6A	L	Belongs to the nucleosome assembly protein (NAP) family	-	-	-	-	KOG1508	[L]	Replication, recombination and repair;	DNA replication factor/protein phosphatase inhibitor SET/SPR-2	-
BnaA06G0286900ZS	BnaA06G0286900ZS	0.487245	-2.61547	3.65861e-05	0.00618349	down	0.09327	0.023912	0.274494	0.841605	0.747143	0.652721	6	2	13	40	46	36	GO:0005886;	CC;	plasma membrane;	-	-	-	UPF0481 protein At3g47200-like [Raphanus sativus]	PF03140.19	Plant protein of unknown function	UPF0481 protein At3g47200 OS=Arabidopsis thaliana OX=3702 GN=At3g47200 PE=2 SV=1	3GHN1	S	UPF0481 protein At3g47200-like	-	-	-	-	-	-	-	-	-
BnaA04G0283300ZS	BnaA04G0283300ZS	5.00024	1.00561	3.72807e-05	0.00627558	up	46.877	40.8905	50.4979	18.643	19.2352	25.1805	1759	1349	1466	548	743	853	GO:0031681;GO:0030041;GO:0051607;GO:0032420;GO:0044354;GO:0005886;GO:0045159;GO:0005096;GO:0005737;GO:0048870;GO:0031267;GO:1903013;GO:0043327;GO:0007015;GO:0016020;GO:0050688;GO:0060091;GO:0050764;GO:0031252;GO:0030837;GO:0032991;GO:0030587;GO:0005856;	MF;BP;BP;CC;CC;CC;MF;MF;CC;BP;MF;BP;BP;BP;CC;BP;CC;BP;CC;BP;CC;BP;CC;	G-protein beta-subunit binding;actin filament polymerization;defense response to virus;stereocilium;macropinosome;plasma membrane;myosin II binding;GTPase activator activity;cytoplasm;cell motility;small GTPase binding;response to differentiation-inducing factor 1;chemotaxis to cAMP;actin filament organization;membrane;regulation of defense response to virus;kinocilium;regulation of phagocytosis;…	-	-	-	ELMO domain-containing protein A isoform X1 [Brassica napus]	PF04727.17	ELMO/CED-12 family	ELMO domain-containing protein A OS=Dictyostelium discoideum OX=44689 GN=elmoA PE=1 SV=1	3HTA8	S	ELMO domain-containing protein	-	-	-	-	KOG2998	[S]	Function unknown;	Uncharacterized conserved protein	-
BnaA05G0484800ZS	BnaA05G0484800ZS	2.71233	-1.93915	3.84312e-05	0.00644338	down	3.10097	4.25707	1.34136	9.55596	10.407	12.0374	77	93	26	185	264	268	-	-	-	-	-	-	uncharacterized protein LOC103855148 [Brassica rapa]	PF14009.10	PADRE domain	-	3I07H	S	Domain of unknown function (DUF4228)	-	-	-	-	-	-	-	-	-
BnaA10G0285000ZS	BnaA10G0285000ZS	0.458537	-2.20474	3.88226e-05	0.00648307	down	0.106681	0.216069	0.117109	0.58587	0.569359	0.799424	8	13	7	32	41	50	GO:0045490;GO:0000272;GO:0098552;GO:0009536;GO:0046872;GO:0030570;GO:0042547;GO:0005739;GO:0005886;GO:0009664;GO:0098542;GO:0005829;GO:0071555;GO:0005576;GO:0070051;GO:0009624;	BP;BP;CC;CC;MF;MF;BP;CC;CC;BP;BP;CC;BP;CC;MF;BP;	pectin catabolic process;polysaccharide catabolic process;side of membrane;plastid;metal ion binding;pectate lyase activity;cell wall modification involved in multidimensional cell growth;mitochondrion;plasma membrane;plant-type cell wall organization;defense response to other organism;cytosol;cell wall organization;extracellular region;fibrinogen binding;response to nematode;	-	ko01100;ko00040	Metabolic pathways;Pentose and glucuronate interconversions	probable pectate lyase 18 [Brassica napus]	PF00544.23	Pectate lyase	Probable pectate lyase 13 OS=Arabidopsis thaliana OX=3702 GN=PMR6 PE=1 SV=1	3HXFY	G	Pectate lyase	COG3866	Pectate lyase	G	Carbohydrate transport and metabolism	-	-	-	-	-
BnaA09G0616400ZS	BnaA09G0616400ZS	1.88533	-2.6469	3.89924e-05	0.00648557	down	0.381445	0.499102	2.55125	3.78524	8.34902	6.72727	41	47	210	314	910	644	GO:0035630;GO:0009229;GO:0030282;GO:0030500;GO:0051262;GO:0016036;GO:0071456;GO:0033883;GO:0016462;GO:0004427;GO:0042131;GO:0046872;GO:0016791;GO:0005829;GO:0065010;GO:0006580;GO:0001958;GO:0052731;GO:0031012;GO:0052732;	BP;BP;BP;BP;BP;BP;BP;MF;MF;MF;MF;MF;MF;CC;CC;BP;BP;MF;CC;MF;	bone mineralization involved in bone maturation;thiamine diphosphate biosynthetic process;bone mineralization;regulation of bone mineralization;protein tetramerization;cellular response to phosphate starvation;cellular response to hypoxia;pyridoxal phosphatase activity;pyrophosphatase activity;inorganic diphosphate phosphatase activity;thiamine phosphate phosphatase activity;metal ion binding;pho…	K13248	ko00750;ko01100	Vitamin B6 metabolism;Metabolic pathways	inorganic pyrophosphatase 2 [Brassica rapa]	PF06888.16	Putative Phosphatase	Inorganic pyrophosphatase 2 OS=Arabidopsis thaliana OX=3702 GN=At1g17710 PE=2 SV=1	3HWS8	S	Inorganic pyrophosphatase	-	-	-	-	KOG3120	[R]	General function prediction only;	Predicted haloacid dehalogenase-like hydrolase	-
BnaC04G0505000ZS	BnaC04G0505000ZS	2.72436	-2.03705	3.92473e-05	0.00650218	down	3.02057	1.97411	4.05009	15.6807	4.75877	13.3615	74	43	77	299	120	294	-	-	-	-	-	-	uncharacterized protein BNAC04G41540D [Brassica napus]	PF11727.12	Invariant surface glycoprotein	-	3I0RM	-	-	-	-	-	-	-	-	-	-	-
BnaC05G0276100ZS	BnaC05G0276100ZS	1.518	-1.4026	3.99201e-05	0.0065876	down	1.00542	0.833094	1.71321	2.99397	3.70583	1.94352	115	84	151	267	434	200	GO:1901656;GO:0055037;GO:0098793;GO:0034436;GO:0015225;GO:0010584;GO:0042335;GO:0042632;GO:0034374;GO:0140352;GO:0032217;GO:0022857;GO:0031667;GO:0048388;GO:0048825;GO:0009651;GO:0071456;GO:0008514;GO:0006897;GO:0009739;GO:0015143;GO:1903825;GO:0009804;GO:0010152;GO:0009620;GO:0055085;GO:0071549;GO:0070633;GO:0005737;GO:0015196;GO:0033700;GO:0032367;GO:1990830;GO:0003729;GO:0010949;GO:0009410;GO:…	BP;CC;CC;BP;MF;BP;BP;BP;BP;BP;MF;MF;BP;BP;BP;BP;BP;MF;BP;BP;MF;BP;BP;BP;BP;BP;BP;BP;CC;MF;BP;BP;BP;MF;BP;BP;CC;BP;BP;BP;BP;BP;CC;MF;BP;MF;CC;BP;BP;BP;BP;BP;CC;CC;CC;CC;MF;BP;BP;BP;BP;BP;BP;BP;BP;BP;BP;BP;BP;MF;MF;MF;CC;BP;CC;CC;CC;BP;BP;CC;BP;BP;BP;CC;MF;BP;CC;MF;CC;BP;BP;BP;BP;BP;BP;BP;BP;MF;BP;CC;BP;BP;BP;BP;BP;BP;BP;BP;BP;MF;BP;MF;BP;BP;BP;BP;BP;BP;BP;CC;BP;MF;MF;MF;BP;BP;MF;CC;BP;MF;BP;BP;BP;…	glycoside transport;recycling endosome;presynapse;glycoprotein transport;biotin transmembrane transporter activity;pollen exine formation;cuticle development;cholesterol homeostasis;low-density lipoprotein particle remodeling;export from cell;riboflavin transmembrane transporter activity;transmembrane transporter activity;response to nutrient levels;endosomal lumen acidification;cotyledon develop…	K05681	-	-	ABC transporter G family member 14 [Brassica napus]	PF01061.28	ABC-2 type transporter	ABC transporter G family member 14 OS=Arabidopsis thaliana OX=3702 GN=ABCG14 PE=1 SV=1	3HYK2	Q	ABC transporter	COG1716	Forkhead associated (FHA) domain, binds pSer, pThr, pTyr	T	Signal transduction mechanisms	KOG0061	[Q]	Secondary metabolites biosynthesis, transport and catabolism;	Transporter, ABC superfamily (Breast cancer resistance protein)	-
BnaA03G0407800ZS	BnaA03G0407800ZS	1.91874	-1.60057	4.24671e-05	0.00698043	down	1.76287	1.69052	1.44412	3.12317	7.04637	3.84664	81	68	51	112	330	158	-	-	-	-	-	-	uncharacterized protein LOC106444277 [Brassica napus]	-	-	-	3HUUE	-	-	-	-	-	-	-	-	-	-	-
BnaC06G0008600ZS	BnaC06G0008600ZS	3.45392	0.967002	4.3412e-05	0.00710786	nonsig	16.138	13.8418	13.1136	7.31081	6.63961	6.5962	482	363	303	171	204	178	GO:0030859;GO:0070062;GO:0055037;GO:0030027;GO:0032228;GO:0030424;GO:0001778;GO:0098793;GO:0019068;GO:0012505;GO:0048514;GO:0047484;GO:0031346;GO:0016477;GO:0030667;GO:1990782;GO:0005769;GO:0007030;GO:1905684;GO:0006897;GO:0005525;GO:0034389;GO:0010807;GO:0060170;GO:0051223;GO:0032880;GO:0032481;GO:0043539;GO:0043204;GO:0071786;GO:0048172;GO:0019882;GO:0032794;GO:0051461;GO:0030140;GO:0048169;GO:…	BP;CC;CC;CC;BP;CC;BP;CC;BP;CC;BP;BP;BP;BP;CC;MF;CC;BP;BP;BP;MF;BP;BP;CC;BP;BP;BP;MF;CC;BP;BP;BP;MF;BP;CC;BP;BP;CC;BP;BP;BP;MF;CC;BP;BP;BP;BP;BP;MF;CC;BP;MF;BP;CC;BP;MF;CC;BP;CC;BP;CC;BP;BP;CC;CC;BP;BP;CC;CC;CC;CC;BP;CC;BP;CC;BP;BP;CC;CC;CC;CC;BP;BP;BP;BP;BP;CC;CC;BP;BP;BP;MF;BP;BP;BP;CC;BP;CC;BP;BP;BP;BP;MF;BP;BP;CC;BP;BP;CC;CC;BP;BP;CC;BP;CC;BP;CC;CC;BP;BP;BP;BP;BP;BP;BP;BP;BP;MF;CC;BP;CC;CC;BP;…	polarized epithelial cell differentiation;extracellular exosome;recycling endosome;lamellipodium;regulation of synaptic transmission, GABAergic;axon;plasma membrane repair;presynapse;virion assembly;endomembrane system;blood vessel morphogenesis;regulation of response to osmotic stress;positive regulation of cell projection organization;cell migration;secretory granule membrane;protein tyrosine k…	K07910	-	-	ras-related protein RABC1-like [Brassica napus]	PF00071.26	Ras family	Ras-related protein RABC1 OS=Arabidopsis thaliana OX=3702 GN=RABC1 PE=1 SV=1	3HQS8	U	atrab18, rab18-1, rabc1 atrab18 (arabidopsis rab gtpase homolog b18)	COG1100	GTPase SAR1 family domain	R	General function prediction only	KOG0080	[R]	General function prediction only;	GTPase Rab18, small G protein superfamily	-
BnaA05G0490000ZS	BnaA05G0490000ZS	1.64887	1.84772	4.40383e-05	0.00718236	up	3.26481	2.62402	6.67744	0.788705	0.825654	1.45408	176	124	278	34	46	71	GO:0009411;GO:0019172;GO:0005794;GO:0106044;GO:0036524;GO:0006979;GO:0042802;GO:0006281;GO:0009268;GO:0009408;GO:0004462;GO:0005829;GO:0006508;GO:0008233;GO:0005737;GO:0030091;	BP;MF;CC;BP;MF;BP;MF;BP;BP;BP;MF;CC;BP;MF;CC;BP;	response to UV;glyoxalase III activity;Golgi apparatus;guanine deglycation;protein deglycase activity;response to oxidative stress;identical protein binding;DNA repair;response to pH;response to heat;lactoylglutathione lyase activity;cytosol;proteolysis;peptidase activity;cytoplasm;protein repair;	K18881	ko01100;ko00620	Metabolic pathways;Pyruvate metabolism	protein DJ-1 homolog D isoform X1 [Brassica napus]	PF01965.28	DJ-1/PfpI family	Protein DJ-1 homolog D OS=Arabidopsis thaliana OX=3702 GN=DJ1D PE=1 SV=1	3HMR9	V	DJ-1/PfpI family	COG0693	Protein/nucleotide deglycase, PfpI/YajL/DJ-1 family (repair of methylglyoxal-glycated proteins and nucleic acids)	V	Defense mechanisms	KOG2764	[RV]	General function prediction only; Defense mechanisms;	Putative transcriptional regulator DJ-1	-
BnaC08G0512700ZS	BnaC08G0512700ZS	4.93271	1.1972	4.67814e-05	0.00760017	up	48.3965	33.171	62.0381	25.0693	18.7974	13.7798	2398	1445	2378	973	959	617	GO:0080147;GO:0042545;GO:0030599;GO:0051722;GO:0005634;GO:0010119;GO:0000139;GO:0000325;GO:0048046;GO:0009409;GO:0030598;GO:0004857;GO:0005802;GO:0009624;GO:0071456;GO:0009860;GO:0010043;GO:0090406;GO:0048364;GO:0009620;GO:1902066;GO:0005886;GO:0052542;GO:0090729;GO:0050832;GO:0046910;GO:0005737;GO:0017148;GO:0045330;GO:0003729;GO:0009835;GO:0048358;GO:0050829;GO:0005829;GO:0005576;GO:0051510;GO:…	BP;BP;MF;MF;CC;BP;CC;CC;CC;BP;MF;MF;CC;BP;BP;BP;BP;CC;BP;BP;BP;CC;BP;MF;BP;MF;CC;BP;MF;MF;BP;BP;BP;CC;CC;BP;CC;BP;CC;CC;BP;BP;BP;BP;BP;BP;BP;CC;BP;CC;	root hair cell development;cell wall modification;pectinesterase activity;protein C-terminal methylesterase activity;nucleus;regulation of stomatal movement;Golgi membrane;plant-type vacuole;apoplast;response to cold;rRNA N-glycosylase activity;enzyme inhibitor activity;trans-Golgi network;response to nematode;cellular response to hypoxia;pollen tube growth;response to zinc ion;pollen tube;root d…	K01051	ko01100;ko00040	Metabolic pathways;Pentose and glucuronate interconversions	PREDICTED: pectinesterase/pectinesterase inhibitor 18 [Brassica oleracea var. oleracea]	PF01095.23	Pectinesterase	Pectinesterase/pectinesterase inhibitor 18 OS=Arabidopsis thaliana OX=3702 GN=PME18 PE=1 SV=3	3HSGP	G	Acts in the modification of cell walls via demethylesterification of cell wall pectin	COG4677	Pectin methylesterase and related acyl-CoA thioesterases	GI	-	-	-	-	-	-
MSTRG.46672.1	MSTRG.46672.1	0.483492	-2.30277	4.82161e-05	0.007803	down	0.049291	0.154647	0.258693	0.843578	0.785788	0.487704	5	14	20	65	80	44	GO:0006520;GO:0000325;GO:0016846;GO:0004838;GO:0048046;GO:0006559;GO:0033855;GO:0030170;GO:0009536;GO:0044540;GO:0009753;GO:0010189;GO:0010188;GO:0009684;GO:0009611;GO:0008483;GO:0080108;GO:0042538;GO:0004121;GO:0006572;GO:0050832;GO:0019761;GO:0001560;GO:0009737;GO:0009058;GO:0048830;GO:0005829;GO:0005739;	BP;CC;MF;MF;CC;BP;MF;MF;CC;MF;BP;BP;BP;BP;BP;MF;MF;BP;MF;BP;BP;BP;BP;BP;BP;BP;CC;CC;	amino acid metabolic process;plant-type vacuole;carbon-sulfur lyase activity;L-tyrosine-2-oxoglutarate transaminase activity;apoplast;L-phenylalanine catabolic process;nicotianamine aminotransferase activity;pyridoxal phosphate binding;plastid;L-cystine L-cysteine-lyase (deaminating);response to jasmonic acid;vitamin E biosynthetic process;response to microbial phytotoxin;indoleacetic acid biosyn…	-	-	-	cystine lyase CORI3-like [Brassica napus]	PF00155.25	Aminotransferase class I and II	Probable aminotransferase TAT4 OS=Arabidopsis thaliana OX=3702 GN=At4g23590 PE=2 SV=1	3HWH9	E	Cystine lyase CORI3-like	COG0436	Aspartate/methionine/tyrosine aminotransferase	E	Amino acid transport and metabolism	KOG0259	[E]	Amino acid transport and metabolism;	Tyrosine aminotransferase	-
BnaA04G0149200ZS	BnaA04G0149200ZS	4.29445	0.709511	4.98739e-05	0.00804025	nonsig	25.2914	23.3925	25.4599	13.4414	14.9599	13.5968	1253	1019	976	522	763	609	GO:0070062;GO:0005507;GO:0043621;GO:0019898;GO:0005634;GO:0009507;GO:0009536;GO:0006734;GO:0000325;GO:0048046;GO:0008746;GO:0005739;GO:0005759;GO:0009409;GO:0016464;GO:0006094;GO:0016491;GO:0016615;GO:0009706;GO:0003723;GO:0042803;GO:0009532;GO:0009570;GO:0019752;GO:0005737;GO:0010319;GO:0045037;GO:0062091;GO:0009658;GO:0080093;GO:0009060;GO:0006097;GO:0006113;GO:0006107;GO:0046166;GO:0043209;GO:…	CC;MF;MF;CC;CC;CC;CC;BP;CC;CC;MF;CC;CC;BP;MF;BP;MF;MF;CC;MF;MF;CC;CC;BP;CC;CC;BP;CC;BP;BP;BP;BP;BP;BP;BP;CC;CC;BP;CC;BP;MF;CC;BP;CC;CC;BP;MF;BP;CC;MF;CC;BP;BP;	extracellular exosome;copper ion binding;obsolete protein self-association;extrinsic component of membrane;nucleus;chloroplast;plastid;NADH metabolic process;plant-type vacuole;apoplast;obsolete NAD(P)+ transhydrogenase activity;mitochondrion;mitochondrial matrix;response to cold;chloroplast protein-transporting ATPase activity;gluconeogenesis;oxidoreductase activity;malate dehydrogenase activity…	K00026	ko01200;ko01100;ko00620;ko00630;ko00020;ko00270;ko01110;ko00710	Carbon metabolism;Metabolic pathways;Pyruvate metabolism;Glyoxylate and dicarboxylate metabolism;Citrate cycle (TCA cycle);Cysteine and methionine metabolism;Biosynthesis of secondary metabolites;Carbon fixation by Calvin cycle	malate dehydrogenase 1, peroxisomal-like [Brassica napus]	PF00056.27	lactate/malate dehydrogenase, NAD binding domain	Malate dehydrogenase 1, peroxisomal OS=Arabidopsis thaliana OX=3702 GN=PMDH1 PE=1 SV=1	3HW70	C	Malate dehydrogenase	COG0039	Malate/lactate dehydrogenase	C	Energy production and conversion	KOG1494	[C]	Energy production and conversion;	NAD-dependent malate dehydrogenase	-
BnaC02G0098400ZS	BnaC02G0098400ZS	1.5745	1.18223	5.13588e-05	0.00824227	up	3.04541	2.08434	4.07263	1.10923	1.33093	1.24293	298	179	308	85	134	110	-	-	-	-	-	-	uncharacterized protein LOC106380727 [Brassica napus]	PF00400.36	WD domain, G-beta repeat	-	3HXSA	A	Transducin family protein WD-40 repeat family	-	-	-	-	KOG0265	[A]	RNA processing and modification;	U5 snRNP-specific protein-like factor and related proteins	-
BnaC04G0069800ZS	BnaC04G0069800ZS	0.589058	1.41699	5.15203e-05	0.00824227	up	0.673397	0.648675	1.08229	0.249706	0.293134	0.24801	81	69	101	26	36	28	GO:0004350;GO:0042538;GO:0005524;GO:0008652;GO:0050661;GO:0005634;GO:0009507;GO:0004349;GO:0017084;GO:0005739;GO:0009651;GO:0003723;GO:0006979;GO:0048364;GO:0005737;GO:0006536;GO:0042802;GO:0005829;GO:0016310;GO:0055129;GO:0005794;GO:0009266;GO:0009414;GO:0031966;GO:0009555;GO:0006561;GO:0006592;GO:0005743;GO:0019240;GO:0009506;GO:0009793;	MF;BP;MF;BP;MF;CC;CC;MF;MF;CC;BP;MF;BP;BP;CC;BP;MF;CC;BP;BP;CC;BP;BP;CC;BP;BP;BP;CC;BP;CC;BP;	glutamate-5-semialdehyde dehydrogenase activity;hyperosmotic salinity response;ATP binding;amino acid biosynthetic process;NADP binding;nucleus;chloroplast;glutamate 5-kinase activity;delta1-pyrroline-5-carboxylate synthetase activity;mitochondrion;response to salt stress;RNA binding;response to oxidative stress;root development;cytoplasm;glutamate metabolic process;identical protein binding;cyto…	K12657	ko01230;ko01100;ko00330;ko01110	Biosynthesis of amino acids;Metabolic pathways;Arginine and proline metabolism;Biosynthesis of secondary metabolites	delta-1-pyrroline-5-carboxylate synthase A isoform X1 [Brassica napus]	PF00696.32	Amino acid kinase family	Delta-1-pyrroline-5-carboxylate synthase A OS=Arabidopsis thaliana OX=3702 GN=P5CSA PE=1 SV=1	3HQI0	E	P5CS plays a key role in proline biosynthesis, leading to osmoregulation in plants	COG0014	Gamma-glutamyl phosphate reductase	E	Amino acid transport and metabolism	KOG4165	[E]	Amino acid transport and metabolism;	Gamma-glutamyl phosphate reductase	-
BnaA06G0051400ZS	BnaA06G0051400ZS	2.59094	0.979836	5.18281e-05	0.00825999	nonsig	6.97814	6.88228	8.03206	2.89999	3.69707	3.59694	267	232	238	87	146	125	GO:0070062;GO:0032148;GO:0006515;GO:0030424;GO:0014823;GO:0030317;GO:0004857;GO:0048678;GO:0120124;GO:0071548;GO:0005737;GO:0009410;GO:0008340;GO:0071333;GO:0005794;GO:0000324;GO:0009314;GO:0000806;GO:0071236;GO:0010269;GO:0071731;GO:0009536;GO:0009507;GO:0000139;GO:0005758;GO:0001520;GO:0051897;GO:0043086;GO:0015036;GO:0000122;GO:0003723;GO:0006890;GO:0042803;GO:0009570;GO:0050832;GO:0015035;GO:…	CC;BP;BP;CC;BP;BP;MF;BP;CC;BP;CC;BP;BP;BP;CC;CC;BP;CC;BP;BP;BP;CC;CC;CC;CC;CC;BP;BP;MF;BP;MF;BP;MF;CC;BP;MF;MF;BP;BP;CC;CC;BP;BP;MF;CC;MF;MF;MF;MF;BP;CC;BP;CC;BP;BP;BP;BP;CC;BP;MF;CC;BP;BP;BP;BP;BP;BP;BP;CC;BP;BP;MF;BP;CC;BP;BP;BP;BP;BP;BP;BP;BP;BP;BP;MF;CC;MF;CC;MF;BP;CC;BP;CC;BP;	extracellular exosome;activation of protein kinase B activity;protein quality control for misfolded or incompletely synthesized proteins;axon;response to activity;flagellated sperm motility;enzyme inhibitor activity;response to axon injury;membrane fusion priming complex;response to dexamethasone;cytoplasm;response to xenobiotic stimulus;determination of adult lifespan;cellular response to glucos…	-	-	-	thioredoxin-like 1-1, chloroplastic [Brassica napus]	PF00085.24	Thioredoxin	Thioredoxin-like 1-1, chloroplastic OS=Arabidopsis thaliana OX=3702 GN=At1g08570 PE=2 SV=1	3HQ43	O	Thioredoxin	COG3118	Chaperedoxin CnoX, contains thioredoxin-like and TPR-like domains, YbbN/TrxSC family	O	Posttranslational modification, protein turnover, chaperones	KOG0907	[O]	Posttranslational modification, protein turnover, chaperones;	Thioredoxin	-
BnaC08G0417700ZS	BnaC08G0417700ZS	6.38731	1.63726	5.23575e-05	0.00831275	up	155.366	149.953	172.215	47.8784	24.2214	67.2624	2892	2454	2480	698	464	1131	-	-	-	-	-	-	histone chaperone ASF1 [Brassica rapa]	PF11847.12	Alpha-(1->3)-arabinofuranosyltransferase	-	3I1ID	-	-	-	-	-	-	-	-	-	-	-
BnaC02G0051700ZS	BnaC02G0051700ZS	2.38013	1.37935	5.26653e-05	0.00833006	up	8.81712	6.94528	5.08585	2.11109	3.21068	2.20089	600	416	268	113	225	136	GO:0071731;GO:0000139;GO:0048441;GO:0009651;GO:0001666;GO:0005886;GO:0005789;GO:0047196;GO:0045017;GO:0048446;GO:0010025;GO:0006071;GO:0008374;GO:0009737;GO:0019432;GO:0102966;GO:0005794;GO:0005783;GO:0009414;GO:0004144;GO:0004467;	BP;CC;BP;BP;BP;CC;CC;MF;BP;BP;BP;BP;MF;BP;BP;MF;CC;CC;BP;MF;MF;	response to nitric oxide;Golgi membrane;petal development;response to salt stress;response to hypoxia;plasma membrane;endoplasmic reticulum membrane;long-chain-alcohol O-fatty-acyltransferase activity;glycerolipid biosynthetic process;petal morphogenesis;wax biosynthetic process;glycerol metabolic process;O-acyltransferase activity;response to abscisic acid;triglyceride biosynthetic process;obsol…	-	-	-	wax ester synthase/diacylglycerol acyltransferase 7-like [Brassica napus]	PF06974.17	WS/DGAT C-terminal domain	Wax ester synthase/diacylglycerol acyltransferase 7 OS=Arabidopsis thaliana OX=3702 GN=WSD7 PE=1 SV=1	3I1Y9	S	Wax ester synthase-like Acyl-CoA acyltransferase domain	COG4908	Uncharacterized conserved protein, contains a NRPS condensation (elongation) domain	R	General function prediction only	-	-	-	-	-
BnaA03G0011200ZS	BnaA03G0011200ZS	4.7206	1.05842	5.37888e-05	0.00845934	up	30.8837	42.7483	41.16	14.3601	21.1954	15.7556	2190	2665	2258	798	1547	1009	GO:0004148;GO:0050451;GO:0043448;GO:0005759;GO:0016656;GO:0046686;GO:0097194;GO:0008860;GO:0006550;GO:0003954;GO:0106314;GO:0007369;GO:0005737;GO:0072592;GO:0003729;GO:0019439;GO:0106316;GO:0005967;GO:0009753;GO:0006308;GO:0045041;GO:0016668;GO:0009941;GO:0005741;GO:0051881;GO:0015046;GO:0072593;GO:0042203;GO:1902493;GO:0006552;GO:0005782;GO:0005507;GO:0045335;GO:0006574;GO:0098869;GO:0050661;GO:…	MF;MF;BP;CC;MF;BP;BP;MF;BP;MF;MF;BP;CC;BP;MF;BP;MF;CC;BP;BP;BP;MF;CC;CC;BP;MF;BP;BP;CC;BP;CC;MF;CC;BP;BP;MF;MF;MF;CC;CC;BP;BP;MF;MF;MF;MF;MF;BP;CC;MF;BP;MF;CC;BP;BP;MF;MF;BP;CC;BP;MF;CC;MF;BP;BP;MF;CC;CC;BP;CC;MF;BP;CC;BP;BP;MF;CC;BP;BP;MF;BP;BP;CC;BP;BP;CC;MF;BP;BP;MF;CC;CC;MF;CC;MF;CC;MF;BP;MF;CC;MF;CC;BP;BP;MF;CC;MF;MF;BP;CC;BP;MF;CC;MF;CC;CC;BP;BP;CC;BP;BP;MF;BP;	dihydrolipoyl dehydrogenase activity;CoA-disulfide reductase (NADPH) activity;alkane catabolic process;mitochondrial matrix;monodehydroascorbate reductase (NADH) activity;response to cadmium ion;execution phase of apoptosis;ferredoxin-NAD+ reductase activity;isoleucine catabolic process;NADH dehydrogenase activity;obsolete nitrite reductase NADPH activity;gastrulation;cytoplasm;oxygen metabolic p…	K08232	ko01100;ko00053	Metabolic pathways;Ascorbate and aldarate metabolism	monodehydroascorbate reductase 2 [Brassica napus]	PF07992.18	Pyridine nucleotide-disulphide oxidoreductase	Monodehydroascorbate reductase 2 OS=Arabidopsis thaliana OX=3702 GN=MDAR2 PE=1 SV=1	3HRBZ	S	monodehydroascorbate reductase	COG1251	NAD(P)H-nitrite reductase, large subunit	C	Energy production and conversion	KOG1336	[R]	General function prediction only;	Monodehydroascorbate/ferredoxin reductase	-
BnaC03G0115000ZS	BnaC03G0115000ZS	2.29698	-2.14469	5.38863e-05	0.00845934	down	1.73993	0.764329	3.60211	7.01561	12.7266	4.75425	108	42	173	340	810	266	GO:0055062;GO:0050826;GO:0009723;GO:0010119;GO:0080091;GO:0006952;GO:0010100;GO:0009094;GO:0009637;GO:0009825;GO:0009651;GO:0009787;GO:0001666;GO:0009739;GO:0000976;GO:0032880;GO:0048555;GO:0009620;GO:0048629;GO:0043480;GO:0005737;GO:0045893;GO:0009909;GO:0009506;GO:0009753;GO:0042761;GO:0008285;GO:0008219;GO:0045723;GO:1990841;GO:0045926;GO:0048765;GO:0007623;GO:0009617;GO:0080092;GO:0002237;GO:…	BP;BP;BP;BP;BP;BP;BP;BP;BP;BP;BP;BP;BP;BP;MF;BP;CC;BP;BP;BP;CC;BP;BP;CC;BP;BP;BP;BP;BP;MF;BP;BP;BP;BP;BP;BP;BP;BP;BP;BP;BP;BP;BP;BP;BP;BP;CC;BP;BP;BP;BP;BP;BP;BP;BP;BP;BP;BP;BP;BP;BP;BP;BP;MF;BP;BP;BP;BP;BP;BP;BP;BP;MF;BP;BP;BP;MF;BP;BP;BP;BP;BP;BP;BP;BP;BP;BP;BP;CC;BP;BP;CC;BP;BP;BP;BP;BP;BP;BP;BP;BP;BP;BP;BP;BP;MF;BP;BP;CC;BP;BP;BP;BP;BP;BP;BP;BP;BP;BP;BP;BP;BP;BP;BP;BP;BP;BP;BP;MF;BP;BP;BP;BP;…	phosphate ion homeostasis;response to freezing;response to ethylene;regulation of stomatal movement;regulation of raffinose metabolic process;defense response;negative regulation of photomorphogenesis;L-phenylalanine biosynthetic process;response to blue light;multidimensional cell growth;response to salt stress;regulation of abscisic acid-activated signaling pathway;response to hypoxia;response …	-	-	-	transcription factor MYB59 isoform X1 [Brassica napus]	PF00249.35	Myb-like DNA-binding domain	Transcription factor MYB59 OS=Arabidopsis thaliana OX=3702 GN=MYB59 PE=2 SV=2	3HW9N	K	Transcription factor	-	-	-	-	KOG0048	[K]	Transcription;	Transcription factor, Myb superfamily	MYB-related,MYB
MSTRG.57070.2	MSTRG.57070.2	0.826762	-1.67413	5.52957e-05	0.00863038	down	0.38044	0.27839	0.604372	1.26109	1.46308	0.974691	20	13	25	52	79	47	GO:0016787;GO:0009506;GO:0052793;GO:0071555;GO:0005576;GO:0009505;GO:0005886;	MF;CC;MF;BP;CC;CC;CC;	hydrolase activity;plasmodesma;pectin acetylesterase activity;cell wall organization;extracellular region;plant-type cell wall;plasma membrane;	-	-	-	pectin acetylesterase 5 isoform X2 [Brassica rapa]	PF03283.17	Pectinacetylesterase	Pectin acetylesterase 5 OS=Arabidopsis thaliana OX=3702 GN=PAE5 PE=2 SV=1	3GF5Z	M	Hydrolyzes acetyl esters in homogalacturonan regions of pectin. In type I primary cell wall, galacturonic acid residues of pectin can be acetylated at the O-2 and O-3 positions. Decreasing the degree of acetylation of pectin gels in vitro alters their physical properties	-	-	-	-	KOG4287	[M]	Cell wall/membrane/envelope biogenesis;	Pectin acetylesterase and similar proteins	-
BnaC02G0354900ZS	BnaC02G0354900ZS	0.772396	-1.77594	5.53876e-05	0.00863038	down	0.462721	0.347202	0.264481	0.733628	1.60943	1.20332	51	34	23	62	177	119	GO:0005507;GO:1901001;GO:0010023;GO:0010106;GO:0006878;GO:0009536;GO:0000329;GO:0000325;GO:0006952;GO:0048046;GO:0009615;GO:0048226;GO:0008447;GO:0006811;GO:0006826;GO:0034755;GO:0016491;GO:0019854;GO:0009651;GO:0006979;GO:0061841;GO:0009813;GO:1990641;GO:0009986;GO:0005886;GO:1901684;GO:0042542;GO:0062040;GO:0080022;GO:0010228;GO:0009753;GO:0009932;GO:0046274;GO:0009809;GO:0033573;GO:0042438;GO:…	MF;BP;BP;BP;BP;CC;CC;CC;BP;CC;BP;CC;MF;BP;BP;BP;MF;BP;BP;BP;CC;BP;BP;CC;CC;BP;BP;CC;BP;BP;BP;BP;BP;BP;CC;BP;MF;MF;CC;CC;BP;BP;MF;MF;CC;CC;BP;CC;BP;BP;BP;BP;BP;CC;	copper ion binding;negative regulation of response to salt stress;proanthocyanidin biosynthetic process;cellular response to iron ion starvation;intracellular copper ion homeostasis;plastid;fungal-type vacuole membrane;plant-type vacuole;defense response;apoplast;response to virus;Casparian strip;L-ascorbate oxidase activity;monoatomic ion transport;iron ion transport;iron ion transmembrane trans…	-	-	-	monocopper oxidase-like protein SKU5 [Brassica napus]	PF00394.26	Multicopper oxidase	Monocopper oxidase-like protein SKU5 OS=Arabidopsis thaliana OX=3702 GN=SKU5 PE=1 SV=1	3HP7Q	Q	Multicopper oxidase	COG2132	Multicopper oxidase with three cupredoxin domains (includes cell division protein FtsP and spore coat protein CotA)	DPM	-	KOG1263	[Q]	Secondary metabolites biosynthesis, transport and catabolism;	Multicopper oxidases	-
BnaC08G0433700ZS	BnaC08G0433700ZS	4.73184	0.958536	5.66922e-05	0.00880095	nonsig	38.9755	35.6427	36.8534	15.1282	17.4267	20.3614	2517	2024	1841	765	1158	1187	GO:0043621;GO:0009723;GO:0048573;GO:0010017;GO:0042335;GO:0010119;GO:0071215;GO:0010100;GO:1990785;GO:0009637;GO:1905421;GO:0010600;GO:2000028;GO:0006783;GO:0047627;GO:0009739;GO:0042631;GO:0000976;GO:0006808;GO:0048586;GO:0000981;GO:0005737;GO:0045893;GO:0009753;GO:0010197;GO:0010313;GO:0048766;GO:0031347;GO:0009704;GO:0055046;GO:1990841;GO:0009266;GO:0009641;GO:0048765;GO:0009408;GO:0007623;GO:…	MF;BP;BP;BP;BP;BP;BP;BP;BP;BP;BP;BP;BP;BP;MF;BP;BP;MF;BP;BP;MF;CC;BP;BP;BP;MF;BP;BP;BP;BP;MF;BP;BP;BP;BP;BP;BP;BP;BP;BP;BP;BP;BP;BP;BP;BP;BP;BP;MF;BP;BP;BP;BP;BP;MF;MF;BP;BP;BP;BP;BP;BP;BP;BP;BP;CC;MF;BP;CC;BP;BP;BP;BP;BP;BP;BP;MF;BP;BP;BP;BP;BP;BP;BP;BP;BP;BP;BP;BP;BP;BP;MF;BP;BP;MF;BP;BP;BP;BP;BP;BP;BP;BP;BP;MF;BP;BP;BP;BP;BP;MF;BP;BP;MF;BP;BP;BP;BP;BP;BP;BP;BP;BP;BP;BP;CC;BP;	obsolete protein self-association;response to ethylene;photoperiodism, flowering;red or far-red light signaling pathway;cuticle development;regulation of stomatal movement;cellular response to abscisic acid stimulus;negative regulation of photomorphogenesis;response to water-immersion restraint stress;response to blue light;regulation of plant organ morphogenesis;regulation of auxin biosynthetic …	-	-	-	transcription factor LRL1 [Brassica napus]	PF00010.30	Helix-loop-helix DNA-binding domain	Transcription factor LRL1 OS=Arabidopsis thaliana OX=3702 GN=LRL1 PE=1 SV=1	3HNQN	K	Basic helix-loop-helix	-	-	-	-	-	-	-	-	-
BnaA08G0255000ZS	BnaA08G0255000ZS	2.56252	-1.10124	5.83168e-05	0.00901973	down	3.2711	3.21755	3.99661	8.2221	8.32982	4.48762	424	367	401	834	1110	525	GO:0051592;GO:0060613;GO:0080008;GO:0048573;GO:0009723;GO:0006281;GO:0000510;GO:0050821;GO:1902953;GO:0031490;GO:0003682;GO:0070828;GO:0000976;GO:0032880;GO:0070210;GO:0048545;GO:0043204;GO:0005737;GO:0045893;GO:0009909;GO:0060612;GO:0009506;GO:0035591;GO:0051865;GO:1904263;GO:0007029;GO:0043153;GO:0097680;GO:0090263;GO:0005794;GO:0005198;GO:0032991;GO:0007281;GO:0006998;GO:0042393;GO:0035859;GO:…	BP;BP;CC;BP;BP;BP;MF;BP;BP;MF;MF;BP;MF;BP;CC;BP;CC;CC;BP;BP;BP;CC;MF;BP;BP;BP;BP;BP;BP;CC;MF;CC;BP;BP;MF;CC;BP;BP;BP;BP;CC;CC;CC;BP;BP;BP;MF;CC;BP;BP;BP;CC;BP;BP;BP;BP;BP;BP;MF;BP;BP;BP;BP;CC;BP;CC;BP;CC;BP;BP;BP;CC;CC;BP;BP;BP;BP;MF;BP;CC;CC;BP;BP;CC;BP;CC;BP;BP;CC;CC;CC;BP;BP;MF;CC;BP;MF;MF;BP;BP;BP;BP;CC;BP;BP;CC;BP;BP;CC;MF;CC;BP;CC;BP;CC;CC;CC;CC;CC;CC;CC;BP;BP;BP;MF;BP;BP;BP;MF;BP;MF;CC;BP;…	response to calcium ion;fat pad development;Cul4-RING E3 ubiquitin ligase complex;photoperiodism, flowering;response to ethylene;DNA repair;H3-H4 histone complex chaperone activity;protein stabilization;positive regulation of ER to Golgi vesicle-mediated transport;chromatin DNA binding;chromatin binding;heterochromatin organization;transcription cis-regulatory region binding;regulation of protein…	K14005	ko04141	Protein processing in endoplasmic reticulum	LOW QUALITY PROTEIN: protein transport protein SEC31 homolog A [Brassica rapa]	PF00400.36	WD domain, G-beta repeat	Protein transport protein SEC31 homolog A OS=Arabidopsis thaliana OX=3702 GN=SEC31A PE=1 SV=1	3HQ3C	U	Protein transport protein SEC31 homolog	COG5635	Predicted NTPase, NACHT family domain	T	Signal transduction mechanisms	KOG0307	[U]	Intracellular trafficking, secretion, and vesicular transport;	Vesicle coat complex COPII, subunit SEC31	-
BnaC03G0679900ZS	BnaC03G0679900ZS	3.12565	-1.20398	5.91893e-05	0.00912103	down	4.94421	5.62387	5.35486	13.8221	13.647	7.13785	312	312	261	682	885	406	-	-	-	-	-	-	uncharacterized protein LOC106382601 [Brassica napus]	PF04086.17	Signal recognition particle, alpha subunit, N-terminal	-	3HMMT	-	-	-	-	-	-	-	-	-	-	-
BnaC07G0451500ZS	BnaC07G0451500ZS	4.3333	-1.30804	6.02567e-05	0.00922288	down	9.88652	11.9973	17.2384	31.3642	20.9561	35.5901	416	443	560	1032	906	1350	GO:0009723;GO:0006952;GO:0007165;GO:0070301;GO:0047484;GO:0009651;GO:0071456;GO:0009739;GO:0000976;GO:1900056;GO:0010120;GO:0009620;GO:0034605;GO:0005737;GO:0009864;GO:0045893;GO:0010228;GO:0009753;GO:0005516;GO:0031347;GO:0010508;GO:0050896;GO:0002758;GO:1990841;GO:0010104;GO:0009941;GO:0043531;GO:0009408;GO:0009617;GO:0002237;GO:0009793;GO:1900425;GO:0009788;GO:0009507;GO:1901141;GO:1905034;GO:…	BP;BP;BP;BP;BP;BP;BP;BP;MF;BP;BP;BP;BP;CC;BP;BP;BP;BP;MF;BP;BP;BP;BP;MF;BP;CC;MF;BP;BP;BP;BP;BP;BP;CC;BP;BP;BP;BP;BP;CC;BP;MF;BP;BP;BP;BP;MF;BP;MF;BP;BP;BP;BP;MF;MF;BP;BP;BP;MF;BP;BP;BP;BP;BP;BP;BP;BP;CC;BP;CC;BP;BP;BP;BP;BP;BP;MF;BP;BP;BP;BP;BP;BP;BP;BP;BP;BP;BP;BP;BP;BP;BP;BP;MF;BP;BP;BP;MF;CC;BP;BP;BP;BP;BP;MF;BP;BP;BP;MF;MF;BP;BP;BP;BP;BP;BP;BP;BP;BP;BP;BP;BP;BP;BP;	response to ethylene;defense response;signal transduction;cellular response to hydrogen peroxide;regulation of response to osmotic stress;response to salt stress;cellular response to hypoxia;response to gibberellin;transcription cis-regulatory region binding;negative regulation of leaf senescence;camalexin biosynthetic process;response to fungus;cellular response to heat;cytoplasm;induced systemi…	K13426	ko04626;ko04016	Plant-pathogen interaction;MAPK signaling pathway - plant	probable WRKY transcription factor 29 [Brassica napus]	PF03106.19	WRKY DNA -binding domain	Probable WRKY transcription factor 29 OS=Arabidopsis thaliana OX=3702 GN=WRKY29 PE=2 SV=1	3HXIP	K	Transcription factor	-	-	-	-	-	-	-	-	WRKY
MSTRG.15157.15	MSTRG.15157.15	0.754262	-1.48609	6.02903e-05	0.00922288	down	0.416861	0.368347	0.411	1.0068	1.39672	0.750499	35	28	27	67	121	57	GO:0005829;GO:0016310;GO:0004674;GO:0005886;GO:0009737;GO:0106310;GO:0016020;GO:0042742;GO:0005524;	CC;BP;MF;CC;BP;MF;CC;BP;MF;	cytosol;phosphorylation;protein serine/threonine kinase activity;plasma membrane;response to abscisic acid;protein serine kinase activity;membrane;defense response to bacterium;ATP binding;	-	-	-	putative cysteine-rich receptor-like protein kinase 39 isoform X2 [Brassica rapa]	PF00069.29	Protein kinase domain	Cysteine-rich receptor-like protein kinase 40 OS=Arabidopsis thaliana OX=3702 GN=CRK40 PE=2 SV=1	3HZAJ	T	Cysteine-rich receptor-like protein kinase	COG0515	Serine/threonine protein kinase	T	Signal transduction mechanisms	-	-	-	-	-
BnaC09G0617900ZS	BnaC09G0617900ZS	3.93937	-1.17457	6.09622e-05	0.00929175	down	9.44298	7.39971	13.5621	25.0168	22.1777	15.9265	108	74	119	223	259	164	GO:0046870;GO:0005507;GO:0008270;GO:0006878;GO:0005634;GO:0046872;GO:0016151;GO:0005737;	MF;MF;MF;BP;CC;MF;MF;CC;	cadmium ion binding;copper ion binding;zinc ion binding;intracellular copper ion homeostasis;nucleus;metal ion binding;nickel cation binding;cytoplasm;	-	-	-	metallothionein-like protein type 2, MT2-4/MT2-25 [Raphanus sativus]	PF01439.22	Metallothionein	Metallothionein-like protein type 2, MT2-4/MT2-25 OS=Brassica juncea OX=3707 PE=3 SV=1	3I11Z	P	Metallothionein-like protein	-	-	-	-	KOG4738	[P]	Inorganic ion transport and metabolism;	Predicted metallothionein	-
BnaA09G0088300ZS	BnaA09G0088300ZS	5.71099	0.98852	6.13946e-05	0.00931798	nonsig	74.4371	61.246	94.0795	29.3041	44.9894	32.2003	1969	1425	1926	607	1225	769	GO:0008361;GO:0043621;GO:0009723;GO:0048573;GO:0010455;GO:0009413;GO:0006952;GO:0070301;GO:0012505;GO:0009825;GO:0009651;GO:0071456;GO:0001666;GO:0009739;GO:0000976;GO:1900056;GO:0010628;GO:0060966;GO:0090058;GO:0048317;GO:0009620;GO:0048731;GO:0031155;GO:0010120;GO:0005737;GO:0045893;GO:0005992;GO:0010228;GO:0002230;GO:0009753;GO:1902890;GO:0005516;GO:1903648;GO:0003713;GO:0009835;GO:0090602;GO:…	BP;MF;BP;BP;BP;BP;BP;BP;CC;BP;BP;BP;BP;BP;MF;BP;BP;BP;BP;BP;BP;BP;BP;BP;CC;BP;BP;BP;BP;BP;BP;MF;BP;MF;BP;BP;BP;MF;BP;MF;MF;BP;BP;BP;BP;BP;BP;BP;CC;BP;BP;BP;BP;CC;BP;BP;BP;MF;BP;BP;BP;BP;BP;BP;BP;BP;CC;BP;BP;MF;BP;MF;BP;BP;BP;BP;BP;BP;BP;BP;BP;BP;BP;BP;BP;BP;CC;BP;BP;BP;BP;BP;BP;BP;BP;BP;BP;BP;BP;CC;BP;BP;BP;BP;BP;BP;BP;BP;BP;BP;BP;CC;BP;BP;BP;BP;MF;BP;BP;BP;BP;BP;BP;BP;BP;BP;BP;BP;BP;BP;BP;BP;BP;…	regulation of cell size;obsolete protein self-association;response to ethylene;photoperiodism, flowering;positive regulation of cell fate commitment;response to flooding;defense response;cellular response to hydrogen peroxide;endomembrane system;multidimensional cell growth;response to salt stress;cellular response to hypoxia;response to hypoxia;response to gibberellin;transcription cis-regulator…	-	-	-	NAC domain-containing protein 104 [Brassica napus]	PF02365.19	No apical meristem (NAM) protein	NAC domain-containing protein 104 OS=Arabidopsis thaliana OX=3702 GN=NAC104 PE=2 SV=1	3HTRB	K	transcription factor	-	-	-	-	-	-	-	-	NAC
BnaA02G0135500ZS	BnaA02G0135500ZS	5.50038	0.715675	6.22964e-05	0.00931798	nonsig	58.4031	48.5003	71.6998	33.2785	33.8612	32.6789	4030	2942	3827	1798	2404	2036	GO:0070062;GO:0005506;GO:0032993;GO:0006520;GO:0045892;GO:0001217;GO:1902000;GO:0009536;GO:0046872;GO:0042802;GO:0000976;GO:0004411;GO:0006559;GO:0006572;GO:0055120;GO:0005829;GO:0005737;	CC;MF;CC;BP;BP;MF;BP;CC;MF;MF;MF;MF;BP;BP;CC;CC;CC;	extracellular exosome;iron ion binding;protein-DNA complex;amino acid metabolic process;negative regulation of DNA-templated transcription;DNA-binding transcription repressor activity;homogentisate catabolic process;plastid;metal ion binding;identical protein binding;transcription cis-regulatory region binding;homogentisate 1,2-dioxygenase activity;L-phenylalanine catabolic process;tyrosine catab…	K00451	ko01100;ko00350	Metabolic pathways;Tyrosine metabolism	homogentisate 1,2-dioxygenase [Brassica rapa]	PF20510.2	Homogentisate 1,2-dioxygenase N-terminal	Homogentisate 1,2-dioxygenase OS=Arabidopsis thaliana OX=3702 GN=HGO PE=2 SV=2	3HSJA	E	homogentisate 1,2-dioxygenase	COG3508	Homogentisate 1,2-dioxygenase	Q	Secondary metabolites biosynthesis, transport and catabolism	KOG1417	[E]	Amino acid transport and metabolism;	Homogentisate 1,2-dioxygenase	-
BnaC05G0552200ZS	BnaC05G0552200ZS	0.789173	1.21357	6.23186e-05	0.00931798	up	1.11007	0.856741	1.32475	0.388858	0.533825	0.372557	139	95	128	39	69	42	GO:0004654;GO:0016123;GO:0009507;GO:0006401;GO:0006397;GO:0005739;GO:0000965;GO:0016036;GO:0003723;GO:0010323;GO:0015995;GO:0009570;GO:0005737;GO:0008033;GO:0003729;GO:0006396;GO:0005829;GO:0000175;GO:0000287;GO:0031425;GO:0006364;GO:0006402;GO:0016120;GO:0000958;	MF;BP;CC;BP;BP;CC;BP;BP;MF;BP;BP;CC;CC;BP;MF;BP;CC;MF;MF;BP;BP;BP;BP;BP;	polyribonucleotide nucleotidyltransferase activity;xanthophyll biosynthetic process;chloroplast;RNA catabolic process;mRNA processing;mitochondrion;mitochondrial RNA 3'-end processing;cellular response to phosphate starvation;RNA binding;negative regulation of isopentenyl diphosphate biosynthetic process, methylerythritol 4-phosphate pathway;chlorophyll biosynthetic process;chloroplast stroma;cyt…	K00962	ko03018	RNA degradation	polyribonucleotide nucleotidyltransferase 1, chloroplastic isoform X1 [Brassica rapa]	PF01138.25	3' exoribonuclease family, domain 1	Polyribonucleotide nucleotidyltransferase 1, chloroplastic OS=Arabidopsis thaliana OX=3702 GN=PNP1 PE=1 SV=1	3HWR0	J	polyribonucleotide nucleotidyltransferase	COG1185	Polyribonucleotide nucleotidyltransferase (polynucleotide phosphorylase)	J	Translation, ribosomal structure and biogenesis	KOG1067	[R]	General function prediction only;	Predicted RNA-binding polyribonucleotide nucleotidyltransferase	-
BnaC03G0799300ZS	BnaC03G0799300ZS	1.04125	-1.45714	6.2374e-05	0.00931798	down	0.799432	0.616822	0.410078	1.5604	1.60616	1.77551	108	73	42	157	211	205	GO:0033365;GO:0070062;GO:0032148;GO:0043621;GO:0030424;GO:2000059;GO:0033146;GO:0098793;GO:0014823;GO:0060090;GO:0043123;GO:0071276;GO:0043066;GO:0050821;GO:0070301;GO:1903955;GO:0048678;GO:0046686;GO:0009651;GO:0007611;GO:0030433;GO:0005525;GO:0120124;GO:0071548;GO:0030150;GO:0035970;GO:1904288;GO:0034605;GO:0043204;GO:0005737;GO:1903071;GO:0043022;GO:0003729;GO:0009410;GO:0002230;GO:0008340;GO:…	BP;CC;BP;MF;CC;BP;BP;CC;BP;MF;BP;BP;BP;BP;BP;BP;BP;BP;BP;BP;BP;MF;CC;BP;BP;BP;MF;BP;CC;CC;BP;MF;MF;BP;BP;BP;CC;MF;MF;CC;BP;BP;MF;BP;MF;BP;CC;CC;CC;CC;MF;BP;CC;BP;CC;BP;MF;CC;BP;BP;BP;BP;BP;BP;BP;CC;BP;CC;CC;BP;CC;CC;CC;BP;BP;MF;MF;BP;MF;MF;BP;MF;BP;MF;BP;MF;BP;BP;MF;BP;CC;MF;MF;CC;BP;BP;MF;CC;CC;BP;BP;BP;BP;MF;BP;CC;BP;CC;BP;MF;BP;CC;BP;BP;BP;BP;CC;CC;MF;BP;MF;MF;MF;MF;BP;MF;MF;BP;CC;BP;CC;BP;BP;…	protein localization to organelle;extracellular exosome;activation of protein kinase B activity;obsolete protein self-association;axon;negative regulation of ubiquitin-dependent protein catabolic process;regulation of intracellular estrogen receptor signaling pathway;presynapse;response to activity;molecular adaptor activity;positive regulation of canonical NF-kappaB signal transduction;cellular …	-	-	-	PREDICTED: TPR repeat-containing thioredoxin TTL1 [Brassica oleracea var. oleracea]	PF07719.21	Tetratricopeptide repeat	TPR repeat-containing thioredoxin TTL1 OS=Arabidopsis thaliana OX=3702 GN=TTL1 PE=1 SV=1	3HN9U	O	TPR repeat-containing thioredoxin	COG4783	Outer membrane protein chaperone/metalloprotease BepA/YfgC, contains M48 and TPR domains	MO	-	KOG1123	[KL]	Transcription; Replication, recombination and repair;	RNA polymerase II transcription initiation/nucleotide excision repair factor TFIIH, 3'-5' helicase subunit SSL2	-
BnaA03G0217100ZS	BnaA03G0217100ZS	2.55427	-1.43754	6.25737e-05	0.00931798	down	3.07669	3.58859	2.49652	6.00929	7.29615	9.79691	105	108	66	161	256	301	GO:0016020;GO:0055046;GO:0046872;GO:0002240;GO:0009561;GO:0009617;GO:0002237;GO:0005771;GO:0002238;	CC;BP;MF;BP;BP;BP;BP;CC;BP;	membrane;microgametogenesis;metal ion binding;response to molecule of oomycetes origin;megagametogenesis;response to bacterium;response to molecule of bacterial origin;multivesicular body;response to molecule of fungal origin;	-	-	-	uncharacterized protein LOC106438220 [Brassica napus]	PF03107.20	C1 domain	Protein VACUOLELESS GAMETOPHYTES OS=Arabidopsis thaliana OX=3702 GN=VLG PE=1 SV=1	3GJZ1	S	BEST Arabidopsis thaliana protein match is Cysteine Histidine-rich C1 domain family protein (TAIR	-	-	-	-	-	-	-	-	-
BnaA06G0117800ZS	BnaA06G0117800ZS	1.99383	-1.51513	6.26052e-05	0.00931798	down	1.45877	1.82188	2.18054	3.09728	5.73186	5.5587	46	50	53	76	183	156	GO:0005634;GO:0009507;GO:0019899;GO:2000030;GO:0000325;GO:0006952;GO:0048046;GO:0009735;GO:0005739;GO:0080148;GO:0009409;GO:0045087;GO:0042344;GO:0009651;GO:0006979;GO:0009751;GO:0042631;GO:0004601;GO:0009739;GO:0042594;GO:0052542;GO:0009407;GO:0005886;GO:1900367;GO:0009570;GO:0009734;GO:0005737;GO:0004364;GO:0042221;GO:0009635;GO:0009629;GO:0009733;GO:0009607;GO:0050832;GO:0045893;GO:0009718;GO:…	CC;CC;MF;BP;CC;BP;CC;BP;CC;BP;BP;BP;BP;BP;BP;BP;BP;MF;BP;BP;BP;BP;CC;BP;CC;BP;CC;MF;BP;BP;BP;BP;BP;BP;BP;BP;CC;BP;BP;CC;BP;BP;BP;MF;BP;BP;BP;CC;	nucleus;chloroplast;enzyme binding;regulation of response to red or far red light;plant-type vacuole;defense response;apoplast;response to cytokinin;mitochondrion;negative regulation of response to water deprivation;response to cold;innate immune response;indole glucosinolate catabolic process;response to salt stress;response to oxidative stress;response to salicylic acid;cellular response to wat…	K00799	ko00480;ko01100	Glutathione metabolism;Metabolic pathways	glutathione S-transferase U26-like [Brassica napus]	PF02798.24	Glutathione S-transferase, N-terminal domain	Glutathione S-transferase U26 OS=Arabidopsis thaliana OX=3702 GN=GSTU26 PE=2 SV=1	3HQAV	O	Glutathione S-transferase	COG0625	Glutathione S-transferase	O	Posttranslational modification, protein turnover, chaperones	KOG0406	[O]	Posttranslational modification, protein turnover, chaperones;	Glutathione S-transferase	-
BnaC08G0442000ZS	BnaC08G0442000ZS	1.63084	3.1382	6.26905e-05	0.00931798	up	4.88001	10.4632	2.53675	0.277761	0.233268	1.34854	199	374	80	9	10	50	GO:0042538;GO:0009867;GO:0005634;GO:0046983;GO:0009738;GO:0009631;GO:0006568;GO:0006952;GO:2000068;GO:0009957;GO:0001708;GO:0010026;GO:0010374;GO:0051090;GO:2000022;GO:0009651;GO:0106167;GO:0010091;GO:0000976;GO:0009269;GO:0005509;GO:0009813;GO:0003677;GO:0010629;GO:0042803;GO:0006355;GO:0005737;GO:0045893;GO:0051289;GO:0009962;GO:0010214;GO:0009753;GO:0043425;GO:0009718;GO:0009759;GO:0080006;GO:…	BP;BP;CC;MF;BP;BP;BP;BP;BP;BP;BP;BP;BP;BP;BP;BP;BP;BP;MF;BP;MF;BP;MF;BP;MF;BP;CC;BP;BP;BP;BP;BP;MF;BP;BP;BP;BP;BP;BP;MF;BP;BP;BP;BP;MF;BP;BP;BP;BP;MF;BP;	hyperosmotic salinity response;jasmonic acid mediated signaling pathway;nucleus;protein dimerization activity;abscisic acid-activated signaling pathway;cold acclimation;tryptophan metabolic process;defense response;regulation of defense response to insect;epidermal cell fate specification;cell fate specification;trichome differentiation;stomatal complex development;regulation of DNA-binding trans…	-	-	-	transcription factor bHLH19-like [Brassica napus]	PF00010.30	Helix-loop-helix DNA-binding domain	Transcription factor bHLH19 OS=Arabidopsis thaliana OX=3702 GN=BHLH19 PE=1 SV=1	3HWD5	K	Transcription factor	-	-	-	-	-	-	-	-	-
BnaA05G0483200ZS	BnaA05G0483200ZS	1.94902	-1.62092	6.38708e-05	0.00943577	down	1.38797	1.08029	2.62355	4.88566	3.65733	5.71534	42	29	61	114	112	153	GO:0070062;GO:0015934;GO:0032040;GO:0097421;GO:0042788;GO:0009536;GO:0009507;GO:0098793;GO:0098556;GO:0003735;GO:0140236;GO:0005739;GO:0005840;GO:0005654;GO:1990904;GO:0042274;GO:0005730;GO:0003723;GO:0030686;GO:0045202;GO:0022627;GO:0000462;GO:0006412;GO:0140242;GO:0005737;GO:0062040;GO:0003729;GO:1990830;GO:0022626;GO:0002181;GO:0098794;GO:0005829;GO:0016020;GO:0006364;GO:0009505;GO:0015935;GO:…	CC;CC;CC;BP;CC;CC;CC;CC;CC;MF;BP;CC;CC;CC;CC;BP;CC;MF;CC;CC;CC;BP;BP;BP;CC;CC;MF;BP;CC;BP;CC;CC;CC;BP;CC;CC;CC;CC;CC;	extracellular exosome;large ribosomal subunit;small-subunit processome;liver regeneration;obsolete polysomal ribosome;plastid;chloroplast;presynapse;cytoplasmic side of rough endoplasmic reticulum membrane;structural constituent of ribosome;translation at presynapse;mitochondrion;ribosome;nucleoplasm;ribonucleoprotein complex;ribosomal small subunit biogenesis;nucleolus;RNA binding;90S preribosom…	-	ko03010	Ribosome	40S ribosomal protein S16-3-like [Brassica napus]	PF00380.23	Ribosomal protein S9/S16	Small ribosomal subunit protein uS9x OS=Arabidopsis thaliana OX=3702 GN=RPS16C PE=2 SV=1	3HTR9	J	Belongs to the universal ribosomal protein uS9 family	COG0103	Ribosomal protein S9	J	Translation, ribosomal structure and biogenesis	KOG1753	[J]	Translation, ribosomal structure and biogenesis;	40S ribosomal protein S16	-
BnaC08G0197700ZS	BnaC08G0197700ZS	2.19689	-1.54043	6.39332e-05	0.00943577	down	2.46071	2.31075	1.67668	8.60569	5.30021	4.00513	91	75	48	248	200	133	GO:0016853;GO:0009536;GO:0009507;GO:0016791;GO:0098552;GO:0005886;GO:0005829;GO:0005576;GO:0005737;	MF;CC;CC;MF;CC;CC;CC;CC;CC;	isomerase activity;plastid;chloroplast;phosphatase activity;side of membrane;plasma membrane;cytosol;extracellular region;cytoplasm;	-	-	-	phosphoglycerate mutase-like protein isoform X1 [Brassica napus]	PF00300.26	Histidine phosphatase superfamily (branch 1)	Phosphoglycerate mutase-like protein OS=Arabidopsis thaliana OX=3702 GN=PGM PE=2 SV=1	3GHHA	G	Phosphoglycerate mutase-like protein 1	COG0406	Broad specificity phosphatase PhoE	G	Carbohydrate transport and metabolism	KOG4754	[G]	Carbohydrate transport and metabolism;	Predicted phosphoglycerate mutase	-
BnaA05G0475800ZS	BnaA05G0475800ZS	1.42674	-1.35844	6.45502e-05	0.00949341	down	1.28285	0.984479	0.91744	2.78297	2.00095	2.82841	77	52	43	131	124	153	GO:0009856;GO:0016757;GO:0000139;GO:0009875;GO:0006004;	BP;MF;CC;BP;BP;	pollination;glycosyltransferase activity;Golgi membrane;pollen-pistil interaction;fucose metabolic process;	-	-	-	O-fucosyltransferase 23-like [Brassica rapa]	PF10250.13	GDP-fucose protein O-fucosyltransferase	O-fucosyltransferase 23 OS=Arabidopsis thaliana OX=3702 GN=OFUT23 PE=1 SV=1	3HY9H	G	GDP-fucose protein O-fucosyltransferase	-	-	-	-	-	-	-	-	-
BnaC01G0299300ZS	BnaC01G0299300ZS	2.13588	-1.6303	6.56785e-05	0.00957826	down	1.39317	2.76366	1.70641	5.29161	7.48398	4.53908	35	61	33	103	191	102	GO:0042538;GO:0045892;GO:0055062;GO:0005634;GO:0009738;GO:0000978;GO:0009643;GO:0009631;GO:0010224;GO:0009409;GO:2000022;GO:0009651;GO:0071456;GO:0006979;GO:0042631;GO:0000976;GO:0006970;GO:0003677;GO:0010117;GO:0006355;GO:0009416;GO:0009753;GO:0046872;GO:2000280;GO:0048235;GO:0035264;GO:1902584;GO:0003700;GO:0043565;GO:0009737;GO:1902074;GO:0045926;GO:0071289;GO:0015979;GO:0009611;GO:0010200;GO:…	BP;BP;BP;CC;BP;MF;BP;BP;BP;BP;BP;BP;BP;BP;BP;MF;BP;MF;BP;BP;BP;BP;MF;BP;BP;BP;BP;MF;MF;BP;BP;BP;BP;BP;BP;BP;BP;BP;BP;BP;	hyperosmotic salinity response;negative regulation of DNA-templated transcription;phosphate ion homeostasis;nucleus;abscisic acid-activated signaling pathway;RNA polymerase II cis-regulatory region sequence-specific DNA binding;photosynthetic acclimation;cold acclimation;response to UV-B;response to cold;regulation of jasmonic acid mediated signaling pathway;response to salt stress;cellular respo…	-	-	-	zinc finger protein ZAT8-like [Brassica napus]	PF13912.10	C2H2-type zinc finger	Zinc finger protein ZAT8 OS=Arabidopsis thaliana OX=3702 GN=ZAT8 PE=2 SV=1	3I0DX	K	zinc finger protein	-	-	-	-	KOG1720	[V]	Defense mechanisms;	Protein tyrosine phosphatase CDC14	C2H2
BnaA05G0003600ZS	BnaA05G0003600ZS	4.78648	-0.723718	6.57965e-05	0.00957826	nonsig	20.7845	20.5258	23.3066	36.3066	30.7913	31.6835	669	581	581	916	1020	921	GO:0043621;GO:0006952;GO:0006513;GO:1905421;GO:0035519;GO:0005769;GO:0071456;GO:0042631;GO:0000976;GO:0005737;GO:0009909;GO:0051865;GO:1904263;GO:0033591;GO:0030100;GO:0009617;GO:0065003;GO:0009793;GO:0031625;GO:0009507;GO:0000139;GO:0045786;GO:0000209;GO:1904262;GO:0000578;GO:0000122;GO:0004842;GO:0060816;GO:0048443;GO:1901371;GO:0050832;GO:0008270;GO:0008432;GO:0098542;GO:0002238;GO:0006886;GO:…	MF;BP;BP;BP;BP;CC;BP;BP;MF;CC;BP;BP;BP;BP;BP;BP;BP;BP;MF;CC;CC;BP;BP;BP;BP;BP;MF;BP;BP;BP;BP;MF;MF;BP;BP;BP;BP;BP;BP;BP;MF;CC;BP;BP;CC;MF;MF;CC;BP;CC;BP;BP;CC;BP;BP;BP;CC;CC;BP;MF;BP;CC;BP;BP;CC;CC;BP;CC;BP;BP;BP;CC;CC;CC;BP;MF;CC;BP;MF;BP;CC;BP;CC;BP;BP;MF;BP;BP;CC;BP;BP;CC;	obsolete protein self-association;defense response;protein monoubiquitination;regulation of plant organ morphogenesis;protein K29-linked ubiquitination;early endosome;cellular response to hypoxia;cellular response to water deprivation;transcription cis-regulatory region binding;cytoplasm;regulation of flower development;protein autoubiquitination;positive regulation of TORC1 signaling;response to…	-	-	-	RING-H2 finger protein ATL5-like [Brassica napus]	PF13639.10	Ring finger domain	RING-H2 finger protein ATL5 OS=Arabidopsis thaliana OX=3702 GN=ATL5 PE=2 SV=1	3HX15	O	RING-H2 finger protein	-	-	-	-	KOG0799	[G]	Carbohydrate transport and metabolism;	Branching enzyme	-
MSTRG.21641.1	MSTRG.21641.1	0.95032	1.23317	6.58127e-05	0.00957826	up	1.41291	1.12558	1.73133	0.432786	0.619685	0.601194	154	108	146	37	70	59	GO:0106167;GO:0045014;GO:0000325;GO:0071249;GO:0009909;GO:0009625;GO:0010218;GO:0006952;GO:0002213;GO:0016036;GO:0031146;GO:0019005;GO:2000022;GO:0009733;GO:0009734;GO:0043224;GO:0009753;GO:0031348;GO:0080022;GO:0010118;GO:0009901;GO:0009611;GO:0010152;GO:0038198;GO:0016567;GO:0009867;GO:0009641;GO:0007049;GO:0000822;GO:0042742;GO:0050832;GO:0009861;GO:0009873;GO:0010011;GO:0048527;GO:0048443;GO:…	BP;BP;CC;BP;BP;BP;BP;BP;BP;BP;BP;CC;BP;BP;BP;CC;BP;BP;BP;BP;BP;BP;BP;MF;BP;BP;BP;BP;MF;BP;BP;BP;BP;MF;BP;BP;BP;CC;BP;MF;	extracellular ATP signaling;carbon catabolite repression of transcription by glucose;plant-type vacuole;cellular response to nitrate;regulation of flower development;response to insect;response to far red light;defense response;defense response to insect;cellular response to phosphate starvation;SCF-dependent proteasomal ubiquitin-dependent protein catabolic process;SCF ubiquitin ligase complex;r…	-	bna04075	Plant hormone signal transduction	coronatine-insensitive protein 1-like [Brassica napus]	PF18791.5	Transport inhibitor response 1 protein domain	Coronatine-insensitive protein 1 OS=Arabidopsis thaliana OX=3702 GN=COI1 PE=1 SV=1	3HN36	S	coi1 coi1 (coronatine insensitive 1)	-	-	-	-	KOG1947	[R]	General function prediction only;	Leucine rich repeat proteins, some proteins contain F-box	-
BnaC08G0191200ZS	BnaC08G0191200ZS	5.47554	-1.13024	6.86642e-05	0.00990736	down	27.2147	26.1126	40.7136	81.1684	66.8114	42.6397	739	624	856	1726	1867	1046	GO:2000171;GO:0070062;GO:0055037;GO:0098793;GO:0032368;GO:1901301;GO:1902953;GO:0098629;GO:0110039;GO:0120183;GO:0000281;GO:0042953;GO:0005769;GO:0007030;GO:0033227;GO:0006897;GO:0005525;GO:0030838;GO:0010628;GO:0034394;GO:0015630;GO:0005737;GO:0010975;GO:0007059;GO:0099562;GO:0034143;GO:0035591;GO:0050714;GO:0098794;GO:1901303;GO:0034497;GO:0097178;GO:0005819;GO:0030496;GO:0043209;GO:0097305;GO:…	BP;CC;CC;CC;BP;BP;BP;BP;BP;BP;BP;BP;CC;BP;BP;BP;MF;BP;BP;BP;CC;CC;BP;BP;BP;BP;MF;BP;CC;BP;BP;BP;CC;CC;CC;BP;BP;BP;BP;BP;CC;CC;MF;CC;BP;CC;BP;CC;BP;CC;CC;CC;BP;BP;CC;BP;CC;MF;MF;BP;BP;BP;CC;MF;BP;CC;BP;BP;BP;CC;BP;BP;BP;BP;CC;BP;BP;CC;BP;BP;CC;CC;BP;BP;MF;BP;CC;BP;CC;CC;CC;BP;CC;MF;BP;BP;CC;BP;BP;CC;CC;BP;BP;BP;BP;CC;CC;BP;CC;BP;CC;BP;BP;BP;BP;BP;MF;BP;CC;BP;BP;BP;BP;BP;BP;BP;BP;CC;CC;CC;CC;BP;BP;…	negative regulation of dendrite development;extracellular exosome;recycling endosome;presynapse;regulation of lipid transport;regulation of cargo loading into COPII-coated vesicle;positive regulation of ER to Golgi vesicle-mediated transport;trans-Golgi network membrane organization;positive regulation of nematode male tail tip morphogenesis;positive regulation of focal adhesion disassembly;mitot…	K07953	ko04141	Protein processing in endoplasmic reticulum	GTP-binding protein SAR1B [Brassica napus]	PF00025.25	ADP-ribosylation factor family	GTP-binding protein SAR1B OS=Arabidopsis thaliana OX=3702 GN=SAR1B PE=1 SV=1	3HXRB	U	Belongs to the small GTPase superfamily. SAR1 family	COG1100	GTPase SAR1 family domain	R	General function prediction only	KOG0077	[U]	Intracellular trafficking, secretion, and vesicular transport;	Vesicle coat complex COPII, GTPase subunit SAR1	-
BnaA07G0362600ZS	BnaA07G0362600ZS	2.71684	1.27759	6.88342e-05	0.00990736	up	9.14048	7.69763	10.3617	2.1911	4.22938	3.82853	431	319	378	81	206	163	GO:0010078;GO:0043434;GO:2000377;GO:0005634;GO:0046872;GO:2000280;	BP;BP;BP;CC;MF;BP;	maintenance of root meristem identity;response to peptide hormone;regulation of reactive oxygen species metabolic process;nucleus;metal ion binding;regulation of root development;	-	-	-	protein RGF1 INDUCIBLE TRANSCRIPTION FACTOR 1 isoform X2 [Brassica napus]	PF04640.18	PLATZ transcription factor	Protein RGF1 INDUCIBLE TRANSCRIPTION FACTOR 1 OS=Arabidopsis thaliana OX=3702 GN=RITF1 PE=1 SV=1	3GCUS	S	PLATZ transcription factor family protein	-	-	-	-	-	-	-	-	PLATZ
BnaC01G0114900ZS	BnaC01G0114900ZS	1.48397	-1.70797	6.89377e-05	0.00990736	down	0.51262	0.947847	1.51972	2.94461	2.87013	3.22626	17	27	38	73	93	92	GO:0016020;GO:0016310;GO:0090148;GO:0005783;GO:0009900;GO:0009567;GO:0048235;GO:0090158;GO:0009705;GO:0016301;GO:0009838;GO:0005789;GO:0061025;GO:0010256;GO:0090693;	CC;BP;BP;CC;BP;BP;BP;BP;CC;MF;BP;CC;BP;BP;BP;	membrane;phosphorylation;membrane fission;endoplasmic reticulum;dehiscence;double fertilization forming a zygote and endosperm;pollen sperm cell differentiation;endoplasmic reticulum membrane organization;plant-type vacuole membrane;kinase activity;abscission;endoplasmic reticulum membrane;membrane fusion;endomembrane system organization;plant organ senescence;	-	-	-	protein DMP4-like [Brassica napus]	PF05078.16	Protein of unknown function (DUF679)	Protein DMP4 OS=Arabidopsis thaliana OX=3702 GN=DMP4 PE=2 SV=1	3HRUM	S	endomembrane system organization	-	-	-	-	-	-	-	-	-
BnaC07G0035800ZS	BnaC07G0035800ZS	1.6519	-2.29068	6.93997e-05	0.00990736	down	0.998372	0.879804	1.17177	3.73151	8.96569	1.50335	48	37	44	140	441	65	GO:0042545;GO:0010154;GO:0000272;GO:0071365;GO:0070726;GO:0051301;GO:0048573;GO:0009612;GO:0045493;GO:0006037;GO:0048046;GO:0009664;GO:0071370;GO:0005739;GO:0009409;GO:0042546;GO:2000899;GO:0009831;GO:0009645;GO:0099503;GO:0071944;GO:0080086;GO:0071456;GO:0030243;GO:0004553;GO:0016762;GO:0016810;GO:0010218;GO:0005886;GO:0009832;GO:0016998;GO:0005737;GO:0009733;GO:0080022;GO:0010087;GO:0016757;GO:…	BP;BP;BP;BP;BP;BP;BP;BP;BP;BP;CC;BP;BP;CC;BP;BP;BP;BP;BP;CC;CC;BP;BP;BP;MF;MF;MF;BP;CC;BP;BP;CC;BP;BP;BP;MF;MF;BP;MF;BP;CC;BP;BP;CC;BP;BP;CC;CC;CC;CC;CC;CC;MF;CC;BP;BP;BP;BP;BP;BP;CC;BP;BP;MF;	cell wall modification;fruit development;polysaccharide catabolic process;cellular response to auxin stimulus;cell wall assembly;cell division;photoperiodism, flowering;response to mechanical stimulus;xylan catabolic process;obsolete cell wall chitin metabolic process;apoplast;plant-type cell wall organization;cellular response to gibberellin stimulus;mitochondrion;response to cold;cell wall biog…	K08235	-	-	probable xyloglucan endotransglucosylase/hydrolase protein 21 [Brassica napus]	PF00722.25	Glycosyl hydrolases family 16	Probable xyloglucan endotransglucosylase/hydrolase protein 21 OS=Arabidopsis thaliana OX=3702 GN=XTH21 PE=2 SV=1	3HYGQ	G	Catalyzes xyloglucan endohydrolysis (XEH) and or endotransglycosylation (XET). Cleaves and religates xyloglucan polymers, an essential constituent of the primary cell wall, and thereby participates in cell wall construction of growing tissues	COG2273	Beta-glucanase, GH16 family	G	Carbohydrate transport and metabolism	-	-	-	-	-
BnaC06G0049000ZS	BnaC06G0049000ZS	4.19738	0.810992	6.94374e-05	0.00990736	nonsig	22.3745	20.0114	30.0317	12.3991	12.2098	13.1335	1831	1440	1901	795	1028	971	-	-	-	-	-	-	PREDICTED: uncharacterized protein LOC106301090 [Brassica oleracea var. oleracea]	PF00168.34	C2 domain	-	3HVC8	S	C2 domain	-	-	-	-	-	-	-	-	-
BnaC04G0442400ZS	BnaC04G0442400ZS	1.24693	-2.64476	6.9506e-05	0.00990736	down	0.736885	0.637538	0.100727	3.74063	4.1447	1.34073	49	38	6	195	284	81	GO:1901576;GO:0003824;GO:0033855;GO:0034276;GO:0016597;GO:0016847;GO:0051301;GO:0008483;GO:0009058;GO:0009612;GO:0004838;GO:0005634;GO:0009507;GO:0033097;GO:0033362;GO:0006952;GO:0009735;GO:0043386;GO:0006572;GO:0005739;GO:0006103;GO:0016829;GO:0009094;GO:0014070;GO:0016491;GO:0004069;GO:0044249;GO:0009693;GO:0030170;GO:0006979;GO:0008171;GO:0032259;GO:0016212;GO:0009089;GO:0047536;GO:0071548;GO:…	BP;MF;MF;BP;MF;MF;BP;MF;BP;BP;MF;CC;CC;CC;BP;BP;BP;BP;BP;CC;BP;MF;BP;BP;MF;MF;BP;BP;MF;BP;MF;BP;MF;BP;MF;BP;BP;BP;MF;MF;BP;BP;CC;BP;CC;BP;BP;BP;MF;BP;BP;BP;MF;BP;BP;BP;BP;MF;BP;BP;MF;BP;CC;BP;BP;BP;MF;MF;BP;MF;BP;	obsolete organic substance biosynthetic process;catalytic activity;nicotianamine aminotransferase activity;kynurenic acid biosynthetic process;amino acid binding;1-aminocyclopropane-1-carboxylate synthase activity;cell division;transaminase activity;biosynthetic process;response to mechanical stimulus;L-tyrosine-2-oxoglutarate transaminase activity;nucleus;chloroplast;amyloplast membrane;lysine b…	K01762	ko01100;ko01110;ko00270	Metabolic pathways;Biosynthesis of secondary metabolites;Cysteine and methionine metabolism	1-aminocyclopropane-1-carboxylate synthase 4 [Brassica napus]	PF00155.25	Aminotransferase class I and II	1-aminocyclopropane-1-carboxylate synthase 4 OS=Arabidopsis thaliana OX=3702 GN=ACS4 PE=1 SV=1	3I24K	E	1-aminocyclopropane-1-carboxylate synthase 4	COG0436	Aspartate/methionine/tyrosine aminotransferase	E	Amino acid transport and metabolism	KOG0256	[T]	Signal transduction mechanisms;	1-aminocyclopropane-1-carboxylate synthase, and related proteins	-
MSTRG.88683.1	MSTRG.88683.1	1.61362	-2.25034	6.9792e-05	0.00990736	down	1.02609	1.40707	0.28443	5.84261	3.80705	2.98599	119	143	26	528	453	312	-	-	-	-	-	-	-	PF11518.12	Protein of unknown function (DUF3221)	-	-	-	-	-	-	-	-	-	-	-	-	-
BnaA03G0420000ZS	BnaA03G0420000ZS	4.34869	-1.2504	6.99649e-05	0.00990736	down	14.399	12.7466	12.4592	42.1835	25.803	20.6925	377	294	253	865	695	489	GO:0008361;GO:0010594;GO:0008347;GO:0034329;GO:0022409;GO:0021762;GO:0007165;GO:0012505;GO:0070301;GO:0016477;GO:0071542;GO:0000281;GO:0005769;GO:0045987;GO:0030838;GO:0014041;GO:0070986;GO:0043131;GO:0043539;GO:0016318;GO:0007369;GO:0048812;GO:0045893;GO:0032794;GO:0050919;GO:0060997;GO:0051450;GO:0070593;GO:0007163;GO:0009653;GO:0043065;GO:0043209;GO:0097178;GO:0050829;GO:0006914;GO:0060263;GO:…	BP;BP;BP;BP;BP;BP;BP;CC;BP;BP;BP;BP;CC;BP;BP;BP;BP;BP;MF;BP;BP;BP;BP;MF;BP;BP;BP;BP;BP;BP;BP;CC;BP;BP;BP;BP;BP;BP;BP;CC;BP;BP;CC;BP;CC;BP;BP;BP;BP;BP;BP;BP;BP;CC;BP;BP;BP;BP;BP;BP;BP;CC;BP;CC;CC;BP;BP;BP;BP;BP;BP;BP;BP;CC;BP;BP;CC;BP;BP;BP;BP;CC;BP;BP;CC;CC;BP;BP;MF;CC;BP;BP;BP;BP;MF;BP;BP;BP;BP;CC;MF;BP;BP;BP;BP;CC;BP;CC;BP;BP;CC;BP;BP;BP;CC;BP;BP;BP;BP;CC;BP;BP;BP;BP;BP;BP;BP;BP;BP;BP;BP;BP;BP;…	regulation of cell size;regulation of endothelial cell migration;glial cell migration;cell junction assembly;positive regulation of cell-cell adhesion;substantia nigra development;signal transduction;endomembrane system;cellular response to hydrogen peroxide;cell migration;dopaminergic neuron differentiation;mitotic cytokinesis;early endosome;positive regulation of smooth muscle contraction;posit…	K04392	ko04145;ko04933	Phagosome;AGE-RAGE signaling pathway in diabetic complications	rac-like GTP-binding protein RHO1 isoform X1 [Brassica napus]	PF00071.26	Ras family	Rac-like GTP-binding protein RHO1 OS=Pisum sativum OX=3888 GN=RHO1 PE=2 SV=1	3HW4R	S	Belongs to the small GTPase superfamily. Rho family	-	-	-	-	KOG0393	[R]	General function prediction only;	Ras-related small GTPase, Rho type	-
BnaA05G0491200ZS	BnaA05G0491200ZS	0.63843	-1.89364	7.04183e-05	0.00993799	down	0.278307	0.365592	0.145676	0.853836	0.750101	1.19264	37	42	15	87	101	140	GO:0051592;GO:0003064;GO:0045176;GO:0030424;GO:0010389;GO:1904094;GO:0043034;GO:0060090;GO:0043066;GO:0014731;GO:0010765;GO:0030673;GO:1902065;GO:0005216;GO:0038180;GO:0007165;GO:0071286;GO:0007611;GO:0000281;GO:0009651;GO:0098915;GO:0015271;GO:0030315;GO:0007030;GO:2000310;GO:0005525;GO:0045184;GO:0000976;GO:0045162;GO:0010628;GO:0000981;GO:0043204;GO:0071709;GO:0001750;GO:0005737;GO:1990722;GO:…	BP;BP;BP;CC;BP;BP;CC;MF;BP;CC;BP;CC;BP;MF;BP;BP;BP;BP;BP;BP;BP;MF;CC;BP;BP;MF;BP;MF;BP;BP;MF;CC;BP;CC;CC;CC;BP;BP;BP;BP;CC;BP;BP;BP;BP;BP;MF;BP;BP;BP;BP;BP;BP;BP;BP;BP;MF;MF;BP;BP;BP;BP;BP;CC;BP;BP;BP;BP;BP;BP;BP;BP;BP;BP;CC;BP;BP;CC;CC;BP;BP;MF;CC;BP;CC;CC;BP;BP;CC;MF;BP;BP;BP;BP;BP;CC;BP;CC;BP;BP;CC;BP;MF;MF;BP;CC;BP;MF;MF;BP;CC;BP;BP;CC;CC;BP;MF;MF;CC;BP;MF;BP;BP;BP;BP;CC;MF;MF;BP;BP;CC;MF;BP;…	response to calcium ion;regulation of heart rate by hormone;apical protein localization;axon;regulation of G2/M transition of mitotic cell cycle;positive regulation of autophagic cell death;costamere;molecular adaptor activity;negative regulation of apoptotic process;spectrin-associated cytoskeleton;positive regulation of sodium ion transport;axolemma;response to L-glutamate;monoatomic ion channe…	K21867	-	-	potassium channel SKOR isoform X1 [Brassica rapa]	PF00520.35	Ion transport protein	Potassium channel SKOR OS=Arabidopsis thaliana OX=3702 GN=SKOR PE=1 SV=1	3HNNY	PT	Potassium channel	COG0664	cAMP-binding domain of CRP or a regulatory subunit of cAMP-dependent protein kinases	T	Signal transduction mechanisms	KOG0498	[PT]	Inorganic ion transport and metabolism; Signal transduction mechanisms;	K+-channel ERG and related proteins, contain PAS/PAC sensor domain	-
BnaC04G0131200ZS	BnaC04G0131200ZS	7.37884	1.2255	7.16955e-05	0.0100843	up	237.338	276.269	291.635	69.3672	128.974	119.189	3554	3638	3379	814	1987	1612	GO:0009749;GO:0005783;GO:0009750;GO:0009617;GO:0005829;GO:0009734;GO:0009744;	BP;CC;BP;BP;CC;BP;BP;	response to glucose;endoplasmic reticulum;response to fructose;response to bacterium;cytosol;auxin-activated signaling pathway;response to sucrose;	-	-	-	dormancy-associated protein homolog 1 [Brassica napus]	PF05564.16	Dormancy/auxin associated protein	Dormancy-associated protein homolog 1 OS=Arabidopsis thaliana OX=3702 GN=DRMH1 PE=1 SV=1	3GJGQ	S	Auxin-repressed 12.5 kDa	-	-	-	-	-	-	-	-	-
BnaC04G0599500ZS	BnaC04G0599500ZS	1.79983	-1.41982	7.34584e-05	0.0102758	down	1.46871	1.74581	1.38636	5.28231	3.35569	3.02491	51	53	37	142	119	94	GO:0016020;GO:0055046;GO:0046872;GO:0002240;GO:0009561;GO:0009617;GO:0002237;GO:0005771;GO:0002238;	CC;BP;MF;BP;BP;BP;BP;CC;BP;	membrane;microgametogenesis;metal ion binding;response to molecule of oomycetes origin;megagametogenesis;response to bacterium;response to molecule of bacterial origin;multivesicular body;response to molecule of fungal origin;	-	-	-	uncharacterized protein LOC111215424 [Brassica napus]	PF03107.20	C1 domain	Protein VACUOLELESS GAMETOPHYTES OS=Arabidopsis thaliana OX=3702 GN=VLG PE=1 SV=1	3GIHH	S	Cysteine Histidine-rich C1 domain family protein	-	-	-	-	-	-	-	-	-
BnaA01G0137400ZS	BnaA01G0137400ZS	3.47459	-1.39733	7.37326e-05	0.0102758	down	4.68121	7.95604	7.00476	19.9032	11.6615	16.5037	104	155	120	345	266	330	-	-	-	-	-	-	uncharacterized protein LOC103861763 [Brassica rapa]	PF04398.16	Protein of unknown function, DUF538	-	3HU3Y	S	Protein of unknown function, DUF538	-	-	-	-	-	-	-	-	-
BnaC08G0376000ZS	BnaC08G0376000ZS	2.25635	1.69049	7.37922e-05	0.0102758	up	6.30828	9.59045	4.93968	1.50599	1.74847	2.75674	533	712	323	100	152	211	GO:0005768;GO:0010417;GO:0005794;GO:0047517;GO:0045492;GO:0006486;GO:0016757;GO:0000139;GO:0042546;GO:0005802;GO:0080116;GO:0071555;GO:0005797;GO:0015020;GO:0009834;	CC;BP;CC;MF;BP;BP;MF;CC;BP;CC;MF;BP;CC;MF;BP;	endosome;glucuronoxylan biosynthetic process;Golgi apparatus;1,4-beta-D-xylan synthase activity;xylan biosynthetic process;protein glycosylation;glycosyltransferase activity;Golgi membrane;cell wall biogenesis;trans-Golgi network;glucuronoxylan glucuronosyltransferase activity;cell wall organization;Golgi medial cisterna;glucuronosyltransferase activity;plant-type secondary cell wall biogenesis;	-	-	-	PREDICTED: uncharacterized protein LOC106312721 [Brassica oleracea var. oleracea]	PF03016.19	Exostosin family	Probable glucuronoxylan glucuronosyltransferase F8H OS=Arabidopsis thaliana OX=3702 GN=F8H PE=2 SV=1	3HNQC	T	Epidermal growth factor-like domain.	-	-	-	-	KOG1021	[GMW]	Carbohydrate transport and metabolism; Cell wall/membrane/envelope biogenesis; Extracellular structures;	Acetylglucosaminyltransferase EXT1/exostosin 1	-
BnaA07G0348400ZS	BnaA07G0348400ZS	2.20192	0.901843	7.6541e-05	0.0106232	nonsig	5.70478	4.75852	4.69326	2.31664	2.67255	2.54277	817	599	520	260	394	329	GO:1904821;GO:0003727;GO:0009507;GO:0032544;GO:0045727;GO:0000963;GO:0009880;GO:0003735;GO:0006397;GO:0005739;GO:0004016;GO:1900865;GO:0009651;GO:0003723;GO:0006979;GO:0048255;GO:0036002;GO:0010343;GO:0000166;GO:0042651;GO:0043489;GO:0003677;GO:0006412;GO:0006355;GO:0009570;GO:0005737;GO:0045893;GO:0010239;GO:0008270;GO:0003729;GO:0048366;GO:0009658;GO:0019843;GO:0009534;GO:0009553;GO:0010019;GO:…	BP;MF;CC;BP;BP;BP;BP;MF;BP;CC;MF;BP;BP;MF;BP;BP;MF;BP;MF;CC;BP;MF;BP;BP;CC;CC;BP;BP;MF;MF;BP;BP;MF;CC;BP;BP;MF;BP;BP;BP;BP;BP;BP;BP;BP;BP;BP;CC;CC;CC;BP;BP;BP;BP;CC;BP;BP;BP;BP;MF;BP;	chloroplast disassembly;single-stranded RNA binding;chloroplast;plastid translation;positive regulation of translation;mitochondrial RNA processing;embryonic pattern specification;structural constituent of ribosome;mRNA processing;mitochondrion;adenylate cyclase activity;chloroplast RNA modification;response to salt stress;RNA binding;response to oxidative stress;mRNA stabilization;pre-mRNA bindi…	-	-	-	pentatricopeptide repeat-containing protein At1g74850, chloroplastic [Brassica rapa]	PF13041.10	PPR repeat family	Pentatricopeptide repeat-containing protein At1g74850, chloroplastic OS=Arabidopsis thaliana OX=3702 GN=PTAC2 PE=2 SV=1	3HTDD	K	Small MutS-related domain	COG1075	Triacylglycerol esterase/lipase EstA, alpha/beta hydrolase fold	I	Lipid transport and metabolism	KOG4196	[K]	Transcription;	bZIP transcription factor MafK	-
BnaC08G0322000ZS	BnaC08G0322000ZS	4.54717	-1.12346	7.67966e-05	0.0106235	down	18.4663	11.823	17.9135	40.6426	34.8569	22.1663	985	555	739	1697	1913	1068	GO:0005615;GO:0051082;GO:0005788;GO:0005783;GO:0000774;GO:0006457;GO:0042802;GO:0005634;GO:0071629;GO:0006613;GO:0006417;GO:0043130;GO:0035091;GO:0005829;GO:0015031;GO:0005737;GO:0006886;	CC;MF;CC;CC;MF;BP;MF;CC;BP;BP;BP;MF;MF;CC;BP;CC;BP;	extracellular space;unfolded protein binding;endoplasmic reticulum lumen;endoplasmic reticulum;adenyl-nucleotide exchange factor activity;protein folding;identical protein binding;nucleus;cytoplasm protein quality control by the ubiquitin-proteasome system;cotranslational protein targeting to membrane;regulation of translation;ubiquitin binding;phosphatidylinositol binding;cytosol;protein transpo…	K09562	ko04141	Protein processing in endoplasmic reticulum	nucleotide exchange factor SIL1 [Brassica napus]	PF08609.14	Nucleotide exchange factor Fes1	Nucleotide exchange factor SIL1 OS=Bos taurus OX=9913 GN=SIL1 PE=2 SV=1	3HMP9	O	Nucleotide exchange factor Fes1	-	-	-	-	KOG2160	[O]	Posttranslational modification, protein turnover, chaperones;	Armadillo/beta-catenin-like repeat-containing protein	-
MSTRG.105249.1	MSTRG.105249.1	2.36026	-1.65632	7.79141e-05	0.0107427	down	2.52422	3.22129	1.4091	8.74871	5.21142	7.44404	210	236	91	570	446	559	GO:0009506;GO:1901684;GO:0006817;GO:0009873;GO:0009507;GO:0005773;GO:1901683;GO:0005794;GO:0009723;GO:0005315;GO:0016036;GO:0015114;GO:0005886;GO:0016020;GO:0015293;GO:0009610;GO:0080187;	CC;BP;BP;BP;CC;CC;MF;CC;BP;MF;BP;MF;CC;CC;MF;BP;BP;	plasmodesma;arsenate ion transmembrane transport;phosphate ion transport;ethylene-activated signaling pathway;chloroplast;vacuole;arsenate ion transmembrane transporter activity;Golgi apparatus;response to ethylene;phosphate transmembrane transporter activity;cellular response to phosphate starvation;obsolete phosphate ion transmembrane transporter activity;plasma membrane;membrane;symporter acti…	-	-	-	probable inorganic phosphate transporter 1-3 [Brassica napus]	PF00083.28	Sugar (and other) transporter	Probable inorganic phosphate transporter 1-3 OS=Arabidopsis thaliana OX=3702 GN=PHT1-3 PE=2 SV=1	3HW5K	P	phosphate transporter	COG2814	Predicted arabinose efflux permease AraJ, MFS family	G	Carbohydrate transport and metabolism	KOG0252	[P]	Inorganic ion transport and metabolism;	Inorganic phosphate transporter	-
BnaC04G0551600ZS	BnaC04G0551600ZS	2.12272	-2.98938	7.83567e-05	0.0107683	down	1.08271	0.618882	2.65915	3.74064	24.6729	3.54449	49	25	92	131	1131	143	GO:0070062;GO:0032715;GO:0055037;GO:0051592;GO:0140157;GO:0030424;GO:0015843;GO:0030157;GO:0043066;GO:0022857;GO:0070301;GO:0005212;GO:0003094;GO:0016477;GO:0009651;GO:0034644;GO:0030315;GO:0071456;GO:0005769;GO:0042631;GO:0070295;GO:0000326;GO:0007154;GO:0055085;GO:0051290;GO:0071549;GO:0042807;GO:0015793;GO:0005737;GO:1990349;GO:0072205;GO:0003729;GO:0016323;GO:0035379;GO:0009506;GO:0032691;GO:…	CC;BP;CC;BP;BP;CC;BP;BP;BP;MF;BP;MF;BP;BP;BP;BP;CC;BP;CC;BP;BP;CC;BP;BP;BP;BP;CC;BP;CC;BP;BP;MF;CC;MF;CC;BP;CC;MF;MF;BP;BP;BP;BP;BP;BP;BP;CC;BP;BP;CC;CC;MF;BP;CC;MF;CC;BP;MF;BP;BP;CC;CC;CC;CC;BP;BP;CC;CC;BP;CC;BP;BP;CC;BP;CC;BP;CC;CC;MF;CC;BP;BP;CC;BP;MF;CC;BP;BP;BP;BP;BP;BP;BP;MF;CC;BP;BP;BP;MF;BP;CC;BP;CC;CC;MF;BP;BP;CC;BP;BP;BP;BP;MF;MF;CC;BP;BP;MF;BP;MF;CC;BP;CC;CC;BP;BP;BP;BP;BP;CC;CC;BP;BP;…	extracellular exosome;negative regulation of interleukin-6 production;recycling endosome;response to calcium ion;ammonium import across plasma membrane;axon;methylammonium transport;pancreatic juice secretion;negative regulation of apoptotic process;transmembrane transporter activity;cellular response to hydrogen peroxide;structural constituent of eye lens;glomerular filtration;cell migration;res…	K09873	-	-	aquaporin TIP1-1 [Brassica napus]	PF00230.24	Major intrinsic protein	Aquaporin TIP1-1 OS=Arabidopsis thaliana OX=3702 GN=TIP1-1 PE=1 SV=1	3HQ8A	G	Belongs to the MIP aquaporin (TC 1.A.8) family	COG0580	Glycerol uptake facilitator or related aquaporin (Major Intrinsic protein Family)	G	Carbohydrate transport and metabolism	KOG0223	[G]	Carbohydrate transport and metabolism;	Aquaporin (major intrinsic protein family)	-
BnaA06G0283900ZS	BnaA06G0283900ZS	0.68855	-2.26651	7.96641e-05	0.0109122	down	0.084696	0.225203	0.44048	0.766435	1.32188	1.23195	6	13	22	38	86	71	GO:0005524;GO:0030968;GO:0000324;GO:1900102;GO:0005783;GO:0046872;GO:0016788;GO:1902600;GO:0007089;GO:0009506;GO:0005576;GO:0003993;GO:0004721;GO:0007049;	MF;BP;CC;BP;CC;MF;MF;BP;BP;CC;CC;MF;MF;BP;	ATP binding;endoplasmic reticulum unfolded protein response;fungal-type vacuole;negative regulation of endoplasmic reticulum unfolded protein response;endoplasmic reticulum;metal ion binding;hydrolase activity, acting on ester bonds;proton transmembrane transport;traversing start control point of mitotic cell cycle;plasmodesma;extracellular region;acid phosphatase activity;phosphoprotein phosphat…	-	-	-	probable inactive purple acid phosphatase 29 [Brassica napus]	PF00149.32	Calcineurin-like phosphoesterase	Probable inactive purple acid phosphatase 29 OS=Arabidopsis thaliana OX=3702 GN=PAP29 PE=2 SV=1	3HPR1	S	Purple acid phosphatase 29	COG1409	3',5'-cyclic AMP phosphodiesterase CpdA	T	Signal transduction mechanisms	KOG1432	[R]	General function prediction only;	Predicted DNA repair exonuclease SIA1	-
BnaA08G0320200ZS	BnaA08G0320200ZS	0.788213	1.0656	8.08042e-05	0.0110323	up	0.976009	1.05827	1.09623	0.480638	0.478686	0.421018	131	125	114	51	67	51	GO:1900425;GO:0009706;GO:0010027;GO:0010228;GO:0000287;GO:0004789;GO:0016787;GO:0009707;GO:0005525;GO:0009507;GO:0009535;GO:0009229;GO:0031969;GO:0034051;GO:0005829;GO:0005737;GO:0009228;	BP;CC;BP;BP;MF;MF;MF;CC;MF;CC;CC;BP;CC;BP;CC;CC;BP;	negative regulation of defense response to bacterium;chloroplast inner membrane;thylakoid membrane organization;vegetative to reproductive phase transition of meristem;magnesium ion binding;thiamine-phosphate diphosphorylase activity;hydrolase activity;chloroplast outer membrane;GTP binding;chloroplast;chloroplast thylakoid membrane;thiamine diphosphate biosynthetic process;chloroplast membrane;n…	-	-	-	probable transmembrane GTPase FZO-like, chloroplastic [Brassica napus]	PF00350.27	Dynamin family	Probable transmembrane GTPase FZO-like, chloroplastic OS=Arabidopsis thaliana OX=3702 GN=FZL PE=1 SV=1	3HNJZ	O	Dynamin family	COG1159	GTPase Era, involved in 16S rRNA processing	J	Translation, ribosomal structure and biogenesis	KOG0448	[O]	Posttranslational modification, protein turnover, chaperones;	Mitofusin 1 GTPase, involved in mitochondrila biogenesis	-
BnaC03G0109100ZS	BnaC03G0109100ZS	2.44438	-1.52708	8.13665e-05	0.011073	down	2.13073	3.48202	2.56325	8.45193	4.57918	8.86137	215	308	200	666	474	805	GO:0099402;GO:0010192;GO:0000139;GO:0005739;GO:0030244;GO:0051753;GO:0005802;GO:0035438;GO:0009860;GO:0042803;GO:0006011;GO:0005886;GO:0046467;GO:0000138;GO:0016757;GO:0006071;GO:0047259;GO:0031150;GO:0009294;GO:0005829;GO:0071555;GO:0042244;GO:0016020;GO:0016760;GO:0000287;GO:0016758;GO:0048868;GO:0005794;GO:0048359;GO:0090540;GO:0009617;GO:0045179;GO:0009506;GO:0005797;GO:0009793;GO:0005768;	BP;BP;CC;CC;BP;MF;CC;MF;BP;MF;BP;CC;BP;CC;MF;BP;MF;BP;BP;CC;BP;BP;CC;MF;MF;MF;BP;CC;BP;BP;BP;CC;CC;CC;BP;CC;	plant organ development;mucilage biosynthetic process;Golgi membrane;mitochondrion;cellulose biosynthetic process;mannan synthase activity;trans-Golgi network;cyclic-di-GMP binding;pollen tube growth;protein homodimerization activity;UDP-glucose metabolic process;plasma membrane;membrane lipid biosynthetic process;Golgi trans cisterna;glycosyltransferase activity;glycerol metabolic process;glucom…	K13680	-	-	glucomannan 4-beta-mannosyltransferase 2 [Brassica napus]	PF13632.10	Glycosyl transferase family group 2	Glucomannan 4-beta-mannosyltransferase 2 OS=Arabidopsis thaliana OX=3702 GN=CSLA2 PE=1 SV=1	3HRGK	M	Glycosyl transferase family 21	COG1215	Glycosyltransferase, catalytic subunit of cellulose synthase and poly-beta-1,6-N-acetylglucosamine synthase	N	Cell motility	-	-	-	-	-
BnaA03G0222200ZS	BnaA03G0222200ZS	1.89799	-1.69853	8.17084e-05	0.0110835	down	1.72571	1.61233	1.28797	5.41674	6.79957	2.28676	79	65	46	192	317	94	GO:1990830;GO:0071456;GO:0043025;GO:0006486;GO:0006487;GO:0046872;GO:0005634;GO:0006013;GO:0009298;GO:0004615;GO:0062040;GO:0010494;GO:0005654;GO:0019853;GO:0005829;GO:0005737;	BP;BP;CC;BP;BP;MF;CC;BP;BP;MF;CC;CC;CC;BP;CC;CC;	cellular response to leukemia inhibitory factor;cellular response to hypoxia;neuronal cell body;protein glycosylation;protein N-linked glycosylation;metal ion binding;nucleus;mannose metabolic process;GDP-mannose biosynthetic process;phosphomannomutase activity;fungal biofilm matrix;cytoplasmic stress granule;nucleoplasm;L-ascorbic acid biosynthetic process;cytosol;cytoplasm;	K17497	ko01110;ko01100;ko00051;ko00520	Biosynthesis of secondary metabolites;Metabolic pathways;Fructose and mannose metabolism;Amino sugar and nucleotide sugar metabolism	phosphomannomutase [Brassica napus]	PF03332.17	Eukaryotic phosphomannomutase	Phosphomannomutase OS=Arabidopsis thaliana OX=3702 GN=PMM PE=1 SV=1	3HNN0	I	in the synthesis of the GDP-mannose and dolichol-phosphate-mannose required for a number of critical mannosyl transfer reactions	COG0561	Hydroxymethylpyrimidine pyrophosphatase and other HAD family phosphatases	HR	-	KOG3189	[I]	Lipid transport and metabolism;	Phosphomannomutase	-
BnaC09G0009500ZS	BnaC09G0009500ZS	1.5014	1.17964	8.27002e-05	0.0111819	up	2.51665	2.61728	3.21529	1.27503	0.981556	1.1304	112	103	111	45	45	46	GO:0070062;GO:0005782;GO:0050357;GO:0018786;GO:0016831;GO:0042632;GO:0002539;GO:0018742;GO:0018785;GO:0042597;GO:0043651;GO:0016691;GO:0004177;GO:0004601;GO:0010628;GO:0042803;GO:0004064;GO:0005886;GO:0046272;GO:0015643;GO:0042577;GO:0005737;GO:0019380;GO:0019260;GO:0043231;GO:0006508;GO:0044255;GO:0009062;GO:0019439;GO:0009274;GO:0052823;GO:0016787;GO:0046839;GO:0008218;GO:0016791;GO:0042802;GO:…	CC;CC;MF;MF;MF;BP;BP;MF;MF;CC;BP;MF;MF;MF;BP;MF;MF;CC;BP;MF;MF;CC;BP;BP;CC;BP;BP;BP;BP;CC;MF;MF;BP;BP;MF;MF;MF;MF;BP;BP;BP;MF;BP;BP;MF;BP;CC;MF;CC;CC;CC;MF;BP;CC;MF;BP;MF;BP;BP;MF;BP;MF;	extracellular exosome;peroxisomal matrix;tropinesterase activity;haloalkane dehalogenase activity;carboxy-lyase activity;cholesterol homeostasis;prostaglandin production involved in inflammatory response;obsolete epoxide hydrolase B activity;haloacetate dehalogenase activity;periplasmic space;linoleic acid metabolic process;chloride peroxidase activity;aminopeptidase activity;peroxidase activity;…	-	-	-	PREDICTED: bifunctional epoxide hydrolase 2 [Brassica oleracea var. oleracea]	PF00561.24	alpha/beta hydrolase fold	Epoxide hydrolase A OS=Mycobacterium tuberculosis (strain ATCC 25618 / H37Rv) OX=83332 GN=ephA PE=1 SV=1	3HRB7	I	epoxide hydrolase	COG0596	2-succinyl-6-hydroxy-2,4-cyclohexadiene-1-carboxylate synthase MenH and related esterases, alpha/beta hydrolase fold	HR	-	KOG4178	[I]	Lipid transport and metabolism;	Soluble epoxide hydrolase	-
BnaA04G0077900ZS	BnaA04G0077900ZS	0.936628	1.26676	8.3742e-05	0.0112863	up	1.09567	1.3449	1.7869	0.555348	0.494967	0.544156	97	105	123	39	46	44	GO:0043066;GO:0019698;GO:0005759;GO:0043011;GO:0031667;GO:0004957;GO:0008610;GO:0016616;GO:0016614;GO:0047936;GO:0000166;GO:0009535;GO:0033306;GO:0008207;GO:0047886;GO:0004090;GO:0051290;GO:0005737;GO:0010304;GO:0060612;GO:0019439;GO:0016323;GO:0017000;GO:0043065;GO:0033764;GO:0000140;GO:0008285;GO:0005777;GO:0070524;GO:0005615;GO:0006694;GO:0070403;GO:0070493;GO:0009941;GO:0003857;GO:0032355;GO:…	BP;BP;CC;BP;BP;MF;BP;MF;MF;MF;MF;CC;BP;BP;MF;MF;BP;CC;BP;BP;BP;CC;BP;BP;MF;MF;BP;CC;MF;CC;BP;MF;BP;CC;MF;BP;BP;BP;MF;MF;MF;MF;MF;CC;CC;MF;CC;BP;BP;MF;CC;BP;MF;MF;MF;BP;MF;MF;CC;BP;BP;BP;MF;BP;BP;BP;BP;BP;MF;MF;MF;MF;CC;BP;CC;MF;BP;BP;CC;BP;CC;BP;MF;BP;BP;MF;MF;MF;CC;BP;BP;BP;CC;MF;CC;MF;MF;BP;BP;BP;BP;BP;BP;MF;MF;BP;BP;MF;BP;BP;MF;CC;CC;BP;BP;MF;MF;MF;BP;BP;MF;BP;BP;BP;CC;CC;MF;BP;BP;BP;BP;MF;MF;…	negative regulation of apoptotic process;D-galacturonate catabolic process;mitochondrial matrix;myeloid dendritic cell differentiation;response to nutrient levels;prostaglandin E receptor activity;lipid biosynthetic process;oxidoreductase activity, acting on the CH-OH group of donors, NAD or NADP as acceptor;oxidoreductase activity, acting on CH-OH group of donors;glucose 1-dehydrogenase [NAD(P)+…	K13606	ko01100;ko00860;ko01110	Metabolic pathways;Porphyrin metabolism;Biosynthesis of secondary metabolites	probable chlorophyll(ide) b reductase NYC1, chloroplastic [Brassica rapa]	PF00106.29	short chain dehydrogenase	Probable chlorophyll(ide) b reductase NYC1, chloroplastic OS=Arabidopsis thaliana OX=3702 GN=NYC1 PE=1 SV=1	3HQXE	Q	chlorophyll(ide) b reductase NYC1, chloroplastic	COG1028	NAD(P)-dependent dehydrogenase, short-chain alcohol dehydrogenase family	I	Lipid transport and metabolism	KOG0725	[R]	General function prediction only;	Reductases with broad range of substrate specificities	-
BnaC05G0537800ZS	BnaC05G0537800ZS	1.11205	-1.71863	8.41476e-05	0.0113046	down	0.45253	0.388338	1.07237	2.41195	1.91058	1.45752	25	19	45	102	106	71	GO:0031625;GO:0009788;GO:0043621;GO:0051301;GO:0005634;GO:0009507;GO:0009738;GO:0061630;GO:0000139;GO:0006511;GO:0060173;GO:0006952;GO:0071470;GO:0060828;GO:0031982;GO:0006513;GO:0005654;GO:0005770;GO:0000209;GO:0016055;GO:0070417;GO:0005769;GO:0071456;GO:0004842;GO:0042631;GO:0009535;GO:0000976;GO:0048443;GO:0048364;GO:0005109;GO:0005886;GO:0005789;GO:0010966;GO:0050832;GO:0009416;GO:0009909;GO:…	MF;BP;MF;BP;CC;CC;BP;MF;CC;BP;BP;BP;BP;BP;CC;BP;CC;CC;BP;BP;BP;CC;BP;MF;BP;CC;MF;BP;BP;MF;CC;CC;BP;BP;BP;BP;CC;MF;BP;BP;MF;CC;BP;BP;BP;MF;BP;BP;CC;BP;BP;BP;BP;BP;CC;BP;BP;BP;BP;CC;CC;BP;BP;BP;MF;BP;BP;BP;CC;BP;BP;BP;BP;BP;BP;BP;CC;CC;	ubiquitin protein ligase binding;negative regulation of abscisic acid-activated signaling pathway;obsolete protein self-association;cell division;nucleus;chloroplast;abscisic acid-activated signaling pathway;ubiquitin protein ligase activity;Golgi membrane;ubiquitin-dependent protein catabolic process;limb development;defense response;cellular response to osmotic stress;regulation of canonical Wn…	K10664	-	-	E3 ubiquitin-protein ligase ATL6-like [Brassica napus]	PF13639.10	Ring finger domain	E3 ubiquitin-protein ligase ATL6 OS=Arabidopsis thaliana OX=3702 GN=ATL6 PE=1 SV=2	3HNJW	O	Zinc finger (C3HC4-type RING finger) family protein	-	-	-	-	KOG0799	[G]	Carbohydrate transport and metabolism;	Branching enzyme	-
BnaA10G0051700ZS	BnaA10G0051700ZS	0.905485	-1.74542	8.44737e-05	0.0113122	down	0.412143	0.671904	0.261898	1.68451	1.26394	1.38574	35	50	18	112	110	106	GO:0051701;GO:0009507;GO:0042981;GO:0005758;GO:0031314;GO:0005739;GO:0005759;GO:0006119;GO:0016491;GO:0005509;GO:0005886;GO:0003954;GO:0070995;GO:0030964;GO:0019655;GO:0055070;GO:0042802;GO:0009060;GO:0019646;GO:0042372;GO:0006116;GO:0043065;GO:0071482;GO:0050136;GO:0010287;GO:0005829;GO:0008137;GO:0005777;GO:0009061;GO:0050660;GO:0031966;GO:0005743;GO:0003955;GO:0006120;GO:0003959;	BP;CC;BP;CC;CC;CC;CC;BP;MF;MF;CC;MF;BP;CC;BP;BP;MF;BP;BP;BP;BP;BP;BP;MF;CC;CC;MF;CC;BP;MF;CC;CC;MF;BP;MF;	biological process involved in interaction with host;chloroplast;regulation of apoptotic process;mitochondrial intermembrane space;extrinsic component of mitochondrial inner membrane;mitochondrion;mitochondrial matrix;oxidative phosphorylation;oxidoreductase activity;calcium ion binding;plasma membrane;NADH dehydrogenase activity;NADPH oxidation;NADH dehydrogenase complex;glycolytic fermentation …	K03885	-	-	internal alternative NAD(P)H-ubiquinone oxidoreductase A1, mitochondrial [Brassica rapa]	PF07992.18	Pyridine nucleotide-disulphide oxidoreductase	Internal alternative NAD(P)H-ubiquinone oxidoreductase A1, mitochondrial OS=Arabidopsis thaliana OX=3702 GN=NDA1 PE=2 SV=1	3HVCU	C	Internal alternative NAD(P)H-ubiquinone oxidoreductase	COG1252	NADH dehydrogenase, FAD-containing subunit	C	Energy production and conversion	KOG2495	[C]	Energy production and conversion;	NADH-dehydrogenase (ubiquinone)	-
MSTRG.88177.1	MSTRG.88177.1	1.49098	2.3033	8.73562e-05	0.0116609	up	4.65013	3.48042	3.34591	0.759641	0.182633	1.15404	398	262	222	51	17	90	GO:0016567;GO:0006952;GO:0005634;	BP;BP;CC;	protein ubiquitination;defense response;nucleus;	-	-	-	F-box protein At3g59000 [Brassica napus]	-	-	Putative F-box/LRR-repeat protein At4g13960 OS=Arabidopsis thaliana OX=3702 GN=At4g13960 PE=4 SV=1	3GIAJ	S	LRR-repeat protein	-	-	-	-	-	-	-	-	-
BnaA09G0528000ZS	BnaA09G0528000ZS	5.08674	-0.594039	8.78399e-05	0.0116883	nonsig	27.17	24.8459	32.0985	40.4329	42.462	34.492	4474	3600	4088	5215	7192	5140	GO:0008361;GO:0070062;GO:0008900;GO:0043621;GO:0030424;GO:0097421;GO:0043123;GO:0042998;GO:0021702;GO:0030317;GO:1902600;GO:0031674;GO:0001772;GO:0140613;GO:0012505;GO:0098629;GO:0006814;GO:0008610;GO:0005391;GO:0030315;GO:0106134;GO:0021766;GO:0042428;GO:0070050;GO:0048863;GO:0055085;GO:0040011;GO:0051001;GO:0005890;GO:0055081;GO:0005737;GO:1990845;GO:0051659;GO:1901660;GO:0016323;GO:0001818;GO:…	BP;CC;MF;MF;CC;BP;BP;BP;BP;BP;BP;CC;CC;MF;CC;BP;BP;BP;MF;CC;BP;BP;BP;BP;BP;BP;BP;BP;CC;BP;CC;BP;BP;BP;CC;BP;BP;CC;BP;BP;CC;BP;MF;BP;MF;CC;CC;BP;BP;MF;CC;CC;MF;BP;BP;CC;BP;BP;MF;CC;BP;BP;BP;BP;BP;BP;BP;CC;CC;BP;CC;CC;CC;BP;CC;BP;MF;CC;CC;CC;CC;BP;BP;BP;BP;CC;BP;CC;BP;BP;BP;MF;BP;BP;BP;CC;CC;CC;BP;MF;BP;CC;BP;BP;BP;BP;BP;BP;CC;BP;BP;BP;MF;CC;MF;BP;BP;CC;CC;BP;BP;BP;MF;CC;BP;BP;BP;CC;BP;CC;CC;BP;BP;…	regulation of cell size;extracellular exosome;P-type potassium:proton transporter activity;obsolete protein self-association;axon;liver regeneration;positive regulation of canonical NF-kappaB signal transduction;positive regulation of Golgi to plasma membrane protein transport;cerebellar Purkinje cell differentiation;flagellated sperm motility;proton transmembrane transport;I band;immunological s…	K01537	-	-	putative calcium-transporting ATPase 11, plasma membrane-type [Brassica napus]	PF00689.25	Cation transporting ATPase, C-terminus	Putative calcium-transporting ATPase 11, plasma membrane-type OS=Arabidopsis thaliana OX=3702 GN=ACA11 PE=1 SV=1	3HXD9	P	This magnesium-dependent enzyme catalyzes the hydrolysis of ATP coupled with the transport of calcium	COG0474	Magnesium-transporting ATPase (P-type)	P	Inorganic ion transport and metabolism	KOG0204	[P]	Inorganic ion transport and metabolism;	Calcium transporting ATPase	-
BnaA01G0027300ZS	BnaA01G0027300ZS	2.24657	0.953757	8.8721e-05	0.0117682	nonsig	5.05915	4.48925	6.71673	2.3058	3.2642	2.15667	676	528	695	242	449	261	GO:0031670;GO:0030027;GO:0098793;GO:0010119;GO:0030335;GO:0009825;GO:0008610;GO:0009651;GO:0046473;GO:0046488;GO:0019375;GO:0001666;GO:0070821;GO:0007010;GO:0005628;GO:0005737;GO:0005901;GO:0022626;GO:0043327;GO:0010044;GO:0046466;GO:0002031;GO:0046475;GO:0005794;GO:0009941;GO:0031410;GO:0005080;GO:0032991;GO:0098981;GO:0009793;GO:0038096;GO:0032266;GO:0070290;GO:0009536;GO:0009507;GO:0000139;GO:…	BP;CC;CC;BP;BP;BP;BP;BP;BP;BP;BP;BP;CC;BP;CC;CC;CC;CC;BP;BP;BP;BP;BP;CC;CC;CC;MF;CC;CC;BP;BP;MF;MF;CC;CC;CC;BP;BP;BP;BP;BP;BP;BP;BP;CC;BP;BP;CC;BP;CC;BP;BP;CC;BP;BP;BP;BP;BP;BP;MF;BP;BP;BP;CC;BP;BP;CC;BP;CC;BP;CC;BP;BP;CC;BP;BP;CC;CC;BP;BP;BP;CC;MF;CC;CC;BP;MF;BP;BP;BP;CC;MF;BP;BP;CC;BP;CC;BP;CC;BP;BP;CC;BP;BP;BP;BP;BP;BP;CC;MF;CC;BP;BP;MF;CC;CC;BP;BP;BP;CC;BP;BP;MF;CC;BP;CC;CC;BP;BP;BP;BP;CC;BP;…	cellular response to nutrient;lamellipodium;presynapse;regulation of stomatal movement;positive regulation of cell migration;multidimensional cell growth;lipid biosynthetic process;response to salt stress;phosphatidic acid metabolic process;phosphatidylinositol metabolic process;galactolipid biosynthetic process;response to hypoxia;tertiary granule membrane;cytoskeleton organization;prospore memb…	K01115	ko00564;ko01110;ko01100;ko00565;ko04144	Glycerophospholipid metabolism;Biosynthesis of secondary metabolites;Metabolic pathways;Ether lipid metabolism;Endocytosis	phospholipase D delta [Brassica napus]	PF12357.12	Phospholipase D C terminal	Phospholipase D delta OS=Arabidopsis thaliana OX=3702 GN=PLDDELTA PE=1 SV=2	3HNV2	K	DNA-dependent RNA polymerase catalyzes the transcription of DNA into RNA using the four ribonucleoside triphosphates as substrates	COG1502	Phosphatidylserine/phosphatidylglycerophosphate/cardiolipin synthase	I	Lipid transport and metabolism	KOG1329	[I]	Lipid transport and metabolism;	Phospholipase D1	-
BnaC07G0512100ZS	BnaC07G0512100ZS	1.94141	1.51619	8.93641e-05	0.0118161	up	4.76085	3.18106	7.07053	1.70127	1.09019	1.92487	238	140	273	67	56	87	GO:0030258;GO:0030794;GO:0009536;GO:0032259;GO:0030782;GO:0000325;GO:0042783;GO:0071766;GO:0008610;GO:0052167;GO:0008171;GO:0001666;GO:0071768;GO:0071890;GO:0009705;GO:0042803;GO:0102964;GO:0005886;GO:0006679;GO:0006633;GO:0005737;GO:0009274;GO:0009793;GO:0006665;GO:0030447;GO:0016126;GO:1901012;GO:0008757;GO:0009821;GO:0009820;GO:0005829;GO:0008825;GO:0002238;GO:0016020;GO:0003838;GO:0005783;GO:…	BP;MF;CC;BP;MF;CC;BP;BP;BP;BP;MF;BP;BP;MF;CC;MF;MF;CC;BP;BP;CC;CC;BP;BP;BP;BP;BP;MF;BP;BP;CC;MF;BP;CC;MF;CC;CC;BP;BP;MF;BP;MF;CC;CC;BP;MF;	lipid modification;(S)-coclaurine-N-methyltransferase activity;plastid;methylation;(S)-tetrahydroprotoberberine N-methyltransferase activity;plant-type vacuole;evasion of host immune response;Actinobacterium-type cell wall biogenesis;lipid biosynthetic process;symbiont-mediated perturbation of host innate immune response;O-methyltransferase activity;response to hypoxia;mycolic acid biosynthetic p…	-	-	-	(S)-coclaurine N-methyltransferase [Brassica napus]	PF02353.24	Mycolic acid cyclopropane synthetase	(S)-coclaurine N-methyltransferase OS=Thalictrum flavum subsp. glaucum OX=150095 GN=fCNMT PE=1 SV=1	3HS8M	M	rRNA small subunit methyltransferase G	COG2230	Cyclopropane fatty-acyl-phospholipid synthase and related methyltransferases	I	Lipid transport and metabolism	-	-	-	-	-
BnaC03G0691200ZS	BnaC03G0691200ZS	3.11804	-1.47095	9.02704e-05	0.0118984	down	6.81544	3.75204	3.96817	15.4527	14.622	8.03114	166	81	75	295	367	177	-	-	-	-	-	-	uncharacterized protein LOC106386118 [Brassica napus]	PF14009.10	PADRE domain	-	3HV0M	S	Domain of unknown function (DUF4228)	-	-	-	-	-	-	-	-	-
BnaA04G0276800ZS	BnaA04G0276800ZS	0.90445	-1.25008	9.16711e-05	0.0120117	down	0.529799	0.56166	0.59931	1.56413	1.01772	1.17593	53	49	47	122	104	106	GO:0032889;GO:0055037;GO:0005795;GO:0005634;GO:0070161;GO:0006952;GO:0005776;GO:0042147;GO:0000131;GO:0005739;GO:0016192;GO:0030659;GO:0005769;GO:0006897;GO:0005935;GO:0045944;GO:0071889;GO:0042803;GO:0005886;GO:0005096;GO:0000138;GO:0005737;GO:0006888;GO:0030054;GO:0031267;GO:0043087;GO:0006887;GO:0043547;GO:0005829;GO:0006914;GO:0005576;GO:0005777;GO:0005794;GO:1901096;GO:0031410;GO:0042470;GO:…	BP;CC;CC;CC;CC;BP;CC;BP;CC;CC;BP;CC;CC;BP;CC;BP;MF;MF;CC;MF;CC;CC;BP;CC;MF;BP;BP;BP;CC;BP;CC;CC;CC;BP;CC;CC;CC;BP;BP;BP;CC;CC;BP;	regulation of vacuole fusion, non-autophagic;recycling endosome;Golgi stack;nucleus;anchoring junction;defense response;autophagosome;retrograde transport, endosome to Golgi;incipient cellular bud site;mitochondrion;vesicle-mediated transport;cytoplasmic vesicle membrane;early endosome;endocytosis;cellular bud neck;positive regulation of transcription by RNA polymerase II;14-3-3 protein binding;p…	-	-	-	uncharacterized protein LOC125608373 isoform X1 [Brassica napus]	PF00566.22	Rab-GTPase-TBC domain	Rab GTPase-activating protein 22 OS=Arabidopsis thaliana OX=3702 GN=RABGAP22 PE=1 SV=1	3HW2P	T	RAB GTPase activator	-	-	-	-	KOG2197	[T]	Signal transduction mechanisms;	Ypt/Rab-specific GTPase-activating protein GYP7 and related proteins	-
MSTRG.79347.1	MSTRG.79347.1	1.1809	-1.48491	9.17031e-05	0.0120117	down	0.773395	0.54038	0.927427	2.00466	2.41695	1.51233	29	18	27	58	91	50	-	-	-	-	-	-	uncharacterized protein LOC106391941 [Brassica napus]	PF18734.5	AbiU2	-	3HN6H	S	Uncharacterised conserved protein UCP022280 (InterPro IPR016803)	-	-	-	-	-	-	-	-	-
BnaA10G0231300ZS	BnaA10G0231300ZS	0.86618	1.60301	9.22271e-05	0.0120427	up	1.64204	1.43994	1.00981	0.468635	0.450807	0.32886	104	80	50	24	30	19	GO:0043621;GO:0050826;GO:0009723;GO:0071215;GO:0009631;GO:0006952;GO:0016301;GO:0012505;GO:0071456;GO:0000976;GO:0009311;GO:0009556;GO:1900459;GO:0009620;GO:0032585;GO:0032877;GO:0009506;GO:0005516;GO:0050829;GO:0038023;GO:0005794;GO:0010227;GO:0009617;GO:0002237;GO:0009755;GO:0009793;GO:0031625;GO:0009788;GO:0071323;GO:0016045;GO:0009536;GO:0009507;GO:0009786;GO:1901141;GO:0010075;GO:0006898;GO:…	MF;BP;BP;BP;BP;BP;MF;CC;BP;MF;BP;BP;BP;BP;CC;BP;CC;MF;BP;MF;CC;BP;BP;BP;BP;BP;MF;BP;BP;BP;CC;CC;BP;BP;BP;BP;BP;BP;BP;BP;CC;MF;MF;BP;BP;BP;MF;BP;BP;CC;BP;BP;BP;MF;MF;BP;BP;BP;BP;MF;BP;BP;BP;MF;BP;MF;BP;CC;CC;CC;BP;MF;CC;BP;MF;CC;MF;BP;BP;BP;BP;BP;BP;BP;BP;BP;BP;MF;BP;CC;MF;BP;BP;BP;BP;MF;BP;BP;BP;BP;BP;CC;BP;BP;MF;BP;BP;BP;MF;CC;CC;BP;MF;BP;MF;BP;CC;BP;BP;CC;CC;BP;CC;BP;CC;BP;BP;BP;BP;BP;BP;BP;BP;…	obsolete protein self-association;response to freezing;response to ethylene;cellular response to abscisic acid stimulus;cold acclimation;defense response;kinase activity;endomembrane system;cellular response to hypoxia;transcription cis-regulatory region binding;oligosaccharide metabolic process;microsporogenesis;positive regulation of brassinosteroid mediated signaling pathway;response to fungus…	-	-	-	U-box domain-containing protein 51 isoform X3 [Brassica rapa]	PF00069.29	Protein kinase domain	U-box domain-containing protein 34 OS=Arabidopsis thaliana OX=3702 GN=PUB34 PE=3 SV=1	3HMCP	T	U-box domain-containing protein	COG1716	Forkhead associated (FHA) domain, binds pSer, pThr, pTyr	T	Signal transduction mechanisms	KOG1187	[T]	Signal transduction mechanisms;	Serine/threonine protein kinase	-
BnaC01G0016200ZS	BnaC01G0016200ZS	6.14095	-0.804185	9.42135e-05	0.0122639	nonsig	54.2558	53.0884	57.3431	95.8363	76.6266	93.2211	3025	2602	2473	4184	4395	4692	GO:0042538;GO:0005634;GO:0000325;GO:0006952;GO:0048046;GO:0009664;GO:0005739;GO:0009409;GO:0099503;GO:0009651;GO:0042744;GO:0006979;GO:0071456;GO:0020037;GO:0004601;GO:0010089;GO:0048658;GO:0009269;GO:0010043;GO:0005509;GO:0009877;GO:0140825;GO:0080001;GO:0005886;GO:0005737;GO:0050832;GO:0009044;GO:0009416;GO:0010228;GO:0009808;GO:0003729;GO:0046872;GO:0048511;GO:0045730;GO:1901430;GO:0009809;GO:…	BP;CC;CC;BP;CC;BP;CC;BP;CC;BP;BP;BP;BP;MF;MF;BP;BP;BP;BP;MF;BP;MF;BP;CC;CC;BP;MF;BP;BP;BP;MF;MF;BP;BP;BP;BP;CC;BP;BP;CC;BP;CC;BP;CC;CC;CC;BP;BP;BP;BP;CC;BP;	hyperosmotic salinity response;nucleus;plant-type vacuole;defense response;apoplast;plant-type cell wall organization;mitochondrion;response to cold;secretory vesicle;response to salt stress;hydrogen peroxide catabolic process;response to oxidative stress;cellular response to hypoxia;heme binding;peroxidase activity;xylem development;anther wall tapetum development;response to desiccation;respons…	K00430	ko01100;ko01110;ko00940	Metabolic pathways;Biosynthesis of secondary metabolites;Phenylpropanoid biosynthesis	PREDICTED: peroxidase 50 [Brassica oleracea var. oleracea]	PF00141.27	Peroxidase	Peroxidase 50 OS=Arabidopsis thaliana OX=3702 GN=PER50 PE=1 SV=1	3GBPG	Q	Removal of H(2)O(2), oxidation of toxic reductants, biosynthesis and degradation of lignin, suberization, auxin catabolism, response to environmental stresses such as wounding, pathogen attack and oxidative stress	-	-	-	-	-	-	-	-	-
BnaA04G0120500ZS	BnaA04G0120500ZS	3.0256	-1.09049	9.53274e-05	0.0123704	down	5.3611	3.70324	6.42554	12.2538	8.14891	9.82451	333	202	309	595	520	550	GO:0015802;GO:0015810;GO:0070778;GO:0015185;GO:0009536;GO:0015399;GO:0006952;GO:0000325;GO:0015183;GO:0009624;GO:0015824;GO:0005774;GO:0015194;GO:0015293;GO:0015186;GO:0015172;GO:0015827;GO:0015808;GO:0006865;GO:0110126;GO:0015193;GO:0005886;GO:0015804;GO:0015174;GO:0015800;GO:0005313;GO:0003333;GO:0016020;GO:0015180;GO:0098712;GO:0031965;GO:0015175;GO:0043090;GO:0015812;GO:0015171;	BP;BP;BP;MF;CC;MF;BP;CC;MF;BP;BP;CC;MF;MF;MF;MF;BP;BP;BP;BP;MF;CC;BP;MF;BP;MF;BP;CC;MF;BP;CC;MF;BP;BP;MF;	basic amino acid transport;aspartate transmembrane transport;L-aspartate transmembrane transport;gamma-aminobutyric acid transmembrane transporter activity;plastid;primary active transmembrane transporter activity;defense response;plant-type vacuole;L-aspartate transmembrane transporter activity;response to nematode;proline transport;vacuolar membrane;L-serine transmembrane transporter activity;s…	K26385	-	-	lysine histidine transporter 1 [Brassica rapa]	PF01490.22	Transmembrane amino acid transporter protein	Lysine histidine transporter 1 OS=Arabidopsis thaliana OX=3702 GN=LHT1 PE=1 SV=1	3HTD1	E	Transporter	-	-	-	-	KOG1303	[E]	Amino acid transport and metabolism;	Amino acid transporters	-
BnaA05G0058400ZS	BnaA05G0058400ZS	3.58707	-1.24119	9.59787e-05	0.012397	down	4.88938	7.5713	10.3701	14.5788	16.9189	17.8003	146	199	240	341	519	480	GO:0004864;GO:0005634;GO:0009867;GO:0009738;GO:0090351;GO:0009536;GO:0006952;GO:0009409;GO:0009789;GO:0009651;GO:0010427;GO:0006970;GO:0009705;GO:0042803;GO:0005886;GO:0005737;GO:0080163;GO:1905183;GO:0042802;GO:1902584;GO:0005829;GO:0009737;GO:0009845;GO:0038023;GO:0062049;GO:0009414;GO:0044389;	MF;CC;BP;BP;BP;CC;BP;BP;BP;BP;MF;BP;CC;MF;CC;CC;BP;BP;MF;BP;CC;BP;BP;MF;CC;BP;MF;	protein phosphatase inhibitor activity;nucleus;jasmonic acid mediated signaling pathway;abscisic acid-activated signaling pathway;seedling development;plastid;defense response;response to cold;positive regulation of abscisic acid-activated signaling pathway;response to salt stress;abscisic acid binding;response to osmotic stress;plant-type vacuole membrane;protein homodimerization activity;plasma…	K14496	ko04016;ko04075	MAPK signaling pathway - plant;Plant hormone signal transduction	abscisic acid receptor PYL6 [Brassica napus]	PF10604.13	Polyketide cyclase / dehydrase and lipid transport	Abscisic acid receptor PYL6 OS=Arabidopsis thaliana OX=3702 GN=PYL6 PE=1 SV=1	3HW4W	S	Abscisic acid receptor	-	-	-	-	-	-	-	-	-
MSTRG.42302.13	MSTRG.42302.13	2.61564	0.732964	9.6124e-05	0.012397	nonsig	6.89453	6.53215	7.06329	3.80725	4.50945	3.17406	3185	2653	2525	1378	2144	1324	GO:0070628;GO:0006513;GO:0006914;GO:0036506;GO:0000209;GO:0003723;GO:0050821;GO:0031625;GO:0003677;GO:0030154;GO:0009506;GO:0008270;GO:0010637;GO:0061630;GO:0007030;GO:1990380;GO:0005576;GO:1904288;GO:0004197;GO:0070536;GO:0006355;GO:0010506;GO:0006508;GO:0006284;GO:0016567;GO:0032922;GO:0043130;GO:0016020;GO:0051087;GO:0005737;GO:0061025;GO:0000151;GO:0000139;GO:0140852;GO:0031398;GO:1903955;GO:…	MF;BP;BP;BP;BP;MF;BP;MF;MF;BP;CC;MF;BP;MF;BP;MF;CC;MF;MF;BP;BP;BP;BP;BP;BP;BP;MF;CC;MF;CC;BP;CC;CC;MF;BP;BP;CC;CC;BP;CC;BP;CC;BP;CC;MF;CC;MF;CC;	proteasome binding;protein monoubiquitination;autophagy;maintenance of unfolded protein;protein polyubiquitination;RNA binding;protein stabilization;ubiquitin protein ligase binding;DNA binding;cell differentiation;plasmodesma;zinc ion binding;negative regulation of mitochondrial fusion;ubiquitin protein ligase activity;Golgi organization;K48-linked deubiquitinase activity;extracellular region;BA…	-	bna04120	Ubiquitin mediated proteolysis	E3 ubiquitin-protein ligase UPL1-like [Brassica napus]	PF06025.16	Domain of Unknown Function (DUF913)	E3 ubiquitin-protein ligase UPL2 OS=Arabidopsis thaliana OX=3702 GN=UPL2 PE=1 SV=3	3HQQB	KO	E3 ubiquitin-protein ligase	-	-	-	-	KOG0939	[OK]	Posttranslational modification, protein turnover, chaperones; Transcription;	E3 ubiquitin-protein ligase/Putative upstream regulatory element binding protein	-
BnaA09G0572900ZS	BnaA09G0572900ZS	0.601244	1.75168	9.84051e-05	0.0126519	up	0.757302	0.961589	0.889283	0.17904	0.331204	0.192422	52	58	48	10	24	12	GO:0070062;GO:0032801;GO:0051603;GO:0009723;GO:0045177;GO:0097061;GO:0051604;GO:0005770;GO:0042359;GO:0043202;GO:0045735;GO:1990019;GO:0010447;GO:0003923;GO:0097264;GO:0004175;GO:0008306;GO:0009751;GO:0048471;GO:0003014;GO:0000326;GO:0048156;GO:1901185;GO:0010629;GO:0008284;GO:0005789;GO:0000323;GO:0006508;GO:0008233;GO:0005737;GO:0010150;GO:0003756;GO:1904646;GO:0012501;GO:0045931;GO:0010214;GO:…	CC;BP;BP;BP;CC;BP;BP;CC;BP;CC;MF;BP;BP;MF;BP;MF;BP;BP;CC;BP;CC;MF;BP;BP;BP;CC;CC;BP;MF;CC;BP;MF;BP;BP;BP;BP;BP;BP;MF;BP;BP;CC;BP;CC;CC;CC;CC;CC;CC;BP;CC;BP;BP;BP;BP;BP;BP;BP;BP;CC;MF;BP;	extracellular exosome;receptor catabolic process;proteolysis involved in protein catabolic process;response to ethylene;apical part of cell;dendritic spine organization;protein maturation;late endosome;vitamin D metabolic process;lysosomal lumen;nutrient reservoir activity;protein storage vacuole organization;response to acidic pH;GPI-anchor transamidase activity;self proteolysis;endopeptidase ac…	K01369	-	-	vacuolar-processing enzyme alpha-isozyme [Brassica napus]	PF01650.22	Peptidase C13 family	Vacuolar-processing enzyme alpha-isozyme OS=Arabidopsis thaliana OX=3702 GN=At2g25940 PE=2 SV=2	3HW6K	O	Vacuolar-processing enzyme	COG5206	Glycosylphosphatidylinositol transamidase (GPIT), subunit GPI8	O	Posttranslational modification, protein turnover, chaperones	KOG1348	[O]	Posttranslational modification, protein turnover, chaperones;	Asparaginyl peptidases	-
BnaC08G0250800ZS	BnaC08G0250800ZS	2.88666	-1.04208	9.8704e-05	0.0126519	down	5.47439	3.84702	4.55119	9.78407	7.80913	8.88654	164	101	105	229	240	240	GO:0009723;GO:0019827;GO:0010017;GO:0010119;GO:0048579;GO:0007165;GO:0009295;GO:0052621;GO:0009787;GO:0005525;GO:0080036;GO:0000976;GO:0006808;GO:0097588;GO:2000155;GO:0005737;GO:0045893;GO:0007623;GO:0009793;GO:0007049;GO:0010082;GO:0000156;GO:0009735;GO:0071368;GO:2000022;GO:0090506;GO:0030435;GO:0000155;GO:0010150;GO:0048837;GO:0003700;GO:0051281;GO:0061128;GO:0043565;GO:0009908;GO:0010038;GO:…	BP;BP;BP;BP;BP;BP;CC;MF;BP;MF;BP;MF;BP;BP;BP;CC;BP;BP;BP;BP;BP;MF;BP;BP;BP;BP;BP;MF;BP;BP;MF;BP;BP;MF;BP;BP;MF;CC;BP;BP;BP;BP;BP;BP;BP;MF;MF;CC;CC;BP;BP;BP;BP;BP;BP;BP;BP;BP;BP;BP;MF;BP;BP;BP;BP;BP;MF;BP;CC;BP;MF;MF;BP;BP;BP;BP;BP;BP;BP;MF;CC;BP;MF;BP;MF;CC;BP;BP;BP;BP;BP;BP;	response to ethylene;stem cell population maintenance;red or far-red light signaling pathway;regulation of stomatal movement;negative regulation of long-day photoperiodism, flowering;signal transduction;nucleoid;diguanylate cyclase activity;regulation of abscisic acid-activated signaling pathway;GTP binding;regulation of cytokinin-activated signaling pathway;transcription cis-regulatory region bi…	K14492	ko04075	Plant hormone signal transduction	two-component response regulator ARR7 [Brassica napus]	PF00072.28	Response regulator receiver domain	Two-component response regulator ARR7 OS=Arabidopsis thaliana OX=3702 GN=ARR7 PE=1 SV=1	3GE4Q	K	two-component response regulator	COG3275	Sensor histidine kinase, LytS/YehU family	T	Signal transduction mechanisms	KOG1601	[K]	Transcription;	GATA-4/5/6 transcription factors	-
BnaC09G0247700ZS	BnaC09G0247700ZS	3.24391	-1.27286	9.90324e-05	0.0126553	down	5.48164	6.75212	4.74349	14.7113	9.5846	14.0631	228	247	153	479	410	528	GO:0009723;GO:0009415;GO:0009631;GO:0009880;GO:0006952;GO:0071369;GO:0048825;GO:0009651;GO:0071456;GO:0001666;GO:1900036;GO:0009739;GO:0000976;GO:0010628;GO:0009620;GO:0034605;GO:0005737;GO:0009864;GO:0045893;GO:0009753;GO:0009835;GO:0031347;GO:0010143;GO:0010166;GO:0008219;GO:0048510;GO:1904277;GO:0010104;GO:0009408;GO:0009617;GO:0051726;GO:0010030;GO:0009788;GO:0009735;GO:0009409;GO:0045595;GO:…	BP;BP;BP;BP;BP;BP;BP;BP;BP;BP;BP;BP;MF;BP;BP;BP;CC;BP;BP;BP;BP;BP;BP;BP;BP;BP;BP;BP;BP;BP;BP;BP;BP;BP;BP;BP;BP;BP;MF;BP;BP;MF;MF;BP;BP;BP;BP;BP;BP;BP;CC;BP;BP;BP;BP;BP;BP;BP;BP;MF;BP;BP;BP;BP;BP;BP;BP;BP;BP;BP;BP;CC;BP;BP;BP;BP;BP;BP;BP;BP;BP;BP;BP;BP;BP;MF;CC;BP;BP;BP;BP;BP;BP;MF;BP;BP;CC;BP;BP;BP;BP;BP;BP;BP;BP;	response to ethylene;response to water;cold acclimation;embryonic pattern specification;defense response;cellular response to ethylene stimulus;cotyledon development;response to salt stress;cellular response to hypoxia;response to hypoxia;positive regulation of cellular response to heat;response to gibberellin;transcription cis-regulatory region binding;positive regulation of gene expression;resp…	K09286	-	-	ethylene-responsive transcription factor 5 [Brassica napus]	PF00847.24	AP2 domain	Ethylene-responsive transcription factor 5 OS=Arabidopsis thaliana OX=3702 GN=ERF5 PE=2 SV=1	3GFZQ	K	ethylene-responsive transcription factor	-	-	-	-	-	-	-	-	AP2/ERF-ERF
BnaC03G0208200ZS	BnaC03G0208200ZS	3.1542	-2.73377	0.000101436	0.0128939	down	4.25836	4.25148	2.6864	18.6892	50.2838	3.84294	170	149	83	582	2057	138	GO:0070062;GO:0032715;GO:0055037;GO:0051592;GO:0030424;GO:0030157;GO:0043066;GO:0022857;GO:0070301;GO:0005212;GO:0003094;GO:0016477;GO:0009651;GO:0034644;GO:0030315;GO:0071456;GO:0005769;GO:0042631;GO:0070295;GO:0000326;GO:0007154;GO:0051290;GO:0071549;GO:0015793;GO:0042807;GO:0005737;GO:1990349;GO:0072205;GO:0003729;GO:0016323;GO:0035379;GO:0009506;GO:0032691;GO:0005901;GO:0005516;GO:0030185;GO:…	CC;BP;CC;BP;CC;BP;BP;MF;BP;MF;BP;BP;BP;BP;CC;BP;CC;BP;BP;CC;BP;BP;BP;BP;CC;CC;BP;BP;MF;CC;MF;CC;BP;CC;MF;BP;BP;BP;BP;BP;BP;BP;CC;BP;BP;CC;CC;MF;BP;CC;MF;CC;BP;MF;BP;BP;CC;CC;CC;BP;CC;CC;CC;BP;BP;BP;CC;BP;CC;BP;CC;CC;MF;CC;BP;BP;CC;BP;MF;CC;BP;BP;BP;BP;BP;BP;MF;CC;BP;BP;BP;CC;CC;MF;BP;BP;BP;CC;BP;BP;BP;BP;MF;MF;CC;BP;BP;MF;BP;MF;CC;BP;CC;BP;BP;BP;BP;CC;BP;CC;BP;BP;BP;CC;MF;CC;BP;BP;CC;MF;BP;BP;BP;…	extracellular exosome;negative regulation of interleukin-6 production;recycling endosome;response to calcium ion;axon;pancreatic juice secretion;negative regulation of apoptotic process;transmembrane transporter activity;cellular response to hydrogen peroxide;structural constituent of eye lens;glomerular filtration;cell migration;response to salt stress;cellular response to UV;T-tubule;cellular r…	K09872	-	-	aquaporin PIP2-2-like [Brassica napus]	PF00230.24	Major intrinsic protein	Aquaporin PIP2-2 OS=Arabidopsis thaliana OX=3702 GN=PIP2-2 PE=1 SV=2	3G7V9	G	Belongs to the MIP aquaporin (TC 1.A.8) family	COG0580	Glycerol uptake facilitator or related aquaporin (Major Intrinsic protein Family)	G	Carbohydrate transport and metabolism	KOG0223	[G]	Carbohydrate transport and metabolism;	Aquaporin (major intrinsic protein family)	-
BnaA09G0584700ZS	BnaA09G0584700ZS	4.49286	-1.09867	0.000101515	0.0128939	down	15.9552	17.1237	12.7375	25.1836	34.6403	32.0745	550	519	340	679	1227	997	GO:0005634;GO:0006541;GO:0099503;GO:0019760;GO:0034722;GO:0030003;GO:0010120;GO:0005886;GO:0006508;GO:0008233;GO:0005737;GO:0006177;GO:0016811;GO:0016787;GO:0005829;GO:0034399;GO:0016740;GO:0003922;GO:0005524;GO:0003921;	CC;BP;CC;BP;MF;BP;BP;CC;BP;MF;CC;BP;MF;MF;CC;CC;MF;MF;MF;MF;	nucleus;glutamine metabolic process;secretory vesicle;glucosinolate metabolic process;gamma-glutamyl-peptidase activity;intracellular monoatomic cation homeostasis;camalexin biosynthetic process;plasma membrane;proteolysis;peptidase activity;cytoplasm;GMP biosynthetic process;hydrolase activity, acting on carbon-nitrogen (but not peptide) bonds, in linear amides;hydrolase activity;cytosol;nuclear…	-	-	-	gamma-glutamyl peptidase 4 [Brassica napus]	PF00117.32	Glutamine amidotransferase class-I	Gamma-glutamyl peptidase 4 OS=Arabidopsis thaliana OX=3702 GN=GGP4 PE=3 SV=1	3G7TX	F	glutamine amidotransferase YLR126C	COG0518	GMP synthase, glutamine amidotransferase domain	F	Nucleotide transport and metabolism	KOG3179	[F]	Nucleotide transport and metabolism;	Predicted glutamine synthetase	-
BnaC08G0478300ZS	BnaC08G0478300ZS	1.61637	1.35571	0.000101823	0.0128941	up	3.37703	2.98635	3.64798	1.42532	1.00755	1.10376	82	64	69	28	26	25	-	-	-	K23553	-	-	post-GPI attachment to proteins factor 3-like [Brassica napus]	PF04080.17	Per1-like family	-	3HY6B	G	Per1-like family	-	-	-	-	KOG2970	[S]	Function unknown;	Predicted membrane protein	-
BnaA05G0113300ZS	BnaA05G0113300ZS	5.11352	-1.12587	0.000102532	0.0129447	down	23.281	22.571	26.3256	60.9797	57.3513	29.4389	1756	1497	1537	3602	4451	2005	GO:0070062;GO:1903334;GO:0030027;GO:0038155;GO:0043066;GO:0043277;GO:0019153;GO:0012505;GO:0070732;GO:0031667;GO:0061779;GO:0006621;GO:0030433;GO:0001666;GO:0071456;GO:0000326;GO:0043412;GO:0035722;GO:0018401;GO:0005178;GO:0042175;GO:0097191;GO:0003810;GO:0005791;GO:0005737;GO:0042825;GO:0030337;GO:0002250;GO:0043065;GO:0043209;GO:0061077;GO:0010205;GO:0036508;GO:0030070;GO:0001671;GO:0055038;GO:…	CC;BP;CC;BP;BP;BP;MF;CC;CC;BP;CC;BP;BP;BP;BP;CC;BP;BP;BP;MF;CC;BP;MF;CC;CC;CC;MF;BP;BP;CC;BP;BP;BP;BP;MF;CC;CC;CC;CC;CC;CC;BP;BP;BP;BP;MF;CC;BP;CC;CC;BP;BP;CC;CC;CC;MF;CC;CC;BP;CC;MF;BP;BP;MF;BP;BP;CC;MF;CC;BP;MF;CC;CC;CC;BP;CC;CC;MF;BP;CC;CC;MF;BP;MF;MF;BP;CC;CC;BP;MF;BP;MF;BP;MF;BP;CC;MF;BP;BP;MF;BP;CC;BP;CC;BP;BP;BP;BP;BP;BP;BP;CC;BP;BP;CC;CC;CC;CC;BP;BP;CC;MF;BP;CC;MF;CC;MF;CC;CC;BP;MF;CC;CC;…	extracellular exosome;positive regulation of protein folding;lamellipodium;interleukin-23-mediated signaling pathway;negative regulation of apoptotic process;apoptotic cell clearance;protein-disulfide reductase (glutathione) activity;endomembrane system;spindle envelope;response to nutrient levels;Tapasin-ERp57 complex;protein retention in ER lumen;obsolete ubiquitin-dependent ERAD pathway;respon…	K09584	ko04141	Protein processing in endoplasmic reticulum	protein disulfide-isomerase 2-3 [Brassica napus]	PF00085.24	Thioredoxin	Protein disulfide-isomerase 2-3 OS=Arabidopsis thaliana OX=3702 GN=PDIL2-3 PE=2 SV=1	3HQPA	O	Belongs to the protein disulfide isomerase family	COG3118	Chaperedoxin CnoX, contains thioredoxin-like and TPR-like domains, YbbN/TrxSC family	O	Posttranslational modification, protein turnover, chaperones	KOG0191	[O]	Posttranslational modification, protein turnover, chaperones;	Thioredoxin/protein disulfide isomerase	-
BnaC04G0213100ZS	BnaC04G0213100ZS	2.65819	-1.64499	0.000103882	0.0130757	down	2.44735	3.92662	2.85458	10.0519	6.42174	10.7818	28	40	26	90	75	111	-	-	-	-	-	-	uncharacterized protein LOC111205266 [Brassica napus]	-	-	-	-	-	-	-	-	-	-	-	-	-	-	-
BnaA07G0342300ZS	BnaA07G0342300ZS	1.41895	0.97174	0.000107562	0.0134984	nonsig	2.33573	2.47509	2.30825	1.03731	1.34422	0.9956	276	258	213	96	165	107	GO:0004465;GO:0031929;GO:0008333;GO:0019915;GO:0006897;GO:0009739;GO:0004806;GO:0140354;GO:1990845;GO:0006641;GO:0005737;GO:0060612;GO:0004771;GO:0009410;GO:0008340;GO:0008289;GO:0097384;GO:0010508;GO:0007005;GO:0010878;GO:0050829;GO:0001935;GO:0005615;GO:0005794;GO:0000324;GO:0006776;GO:0016298;GO:0051881;GO:0033993;GO:0006631;GO:0001650;GO:0009409;GO:0097009;GO:0005811;GO:0016615;GO:0016042;GO:…	MF;BP;BP;BP;BP;BP;MF;BP;BP;BP;CC;BP;MF;BP;BP;MF;BP;BP;BP;BP;BP;BP;CC;CC;CC;BP;MF;BP;BP;BP;CC;BP;BP;CC;MF;BP;BP;BP;BP;BP;BP;BP;BP;BP;BP;BP;CC;BP;BP;BP;BP;BP;BP;BP;BP;BP;CC;BP;BP;BP;BP;BP;BP;BP;BP;BP;BP;CC;BP;BP;BP;BP;BP;BP;BP;BP;CC;BP;BP;BP;BP;BP;BP;BP;MF;BP;CC;BP;BP;BP;CC;BP;BP;BP;BP;MF;BP;BP;BP;BP;BP;BP;BP;CC;BP;BP;CC;BP;BP;BP;BP;BP;BP;BP;BP;	lipoprotein lipase activity;TOR signaling;endosome to lysosome transport;lipid storage;endocytosis;response to gibberellin;triacylglycerol lipase activity;lipid import into cell;adaptive thermogenesis;triglyceride metabolic process;cytoplasm;adipose tissue development;sterol ester esterase activity;response to xenobiotic stimulus;determination of adult lifespan;lipid binding;cellular lipid biosyn…	-	-	-	uncharacterized protein LOC103831866 isoform X1 [Brassica rapa]	PF04083.20	Partial alpha/beta-hydrolase lipase region	Lipase member M OS=Homo sapiens OX=9606 GN=LIPM PE=2 SV=2	3HSV9	I	Lipase family	-	-	-	-	KOG2624	[I]	Lipid transport and metabolism;	Triglyceride lipase-cholesterol esterase	-
[truncated: 41,581 more rows]

## Sheet: ZS6
GeneID	Symbol	fpkmMean	log2FoldChange	pvalue	padj	regulated	ZS6-Treatment-3 (FPKM)	ZS6-Treatment-2 (FPKM)	ZS6-Treatment-1 (FPKM)	ZS6-Control-1 (FPKM)	ZS6-Control-2 (FPKM)	ZS6-Control-3 (FPKM)	ZS6-Treatment-3 (Count)	ZS6-Treatment-2 (Count)	ZS6-Treatment-1 (Count)	ZS6-Control-1 (Count)	ZS6-Control-2 (Count)	ZS6-Control-3 (Count)	go_id	go_class	go_description	KO_id	pathway_id	pathway_description	nr	pfam_id	pfam_description	swiss	eggNOG_group	eggNOG_class	eggNOG_function	COGID	COGName	COGFunctionalCategory	COGFunctionalCategoryDescription	KOGName	KOGFuncCode	KOGFuncCategories	KOGFuncDescription	TransFactor
[truncated: 42,856 more rows]
