# Supplementary material
Source: Research Square preprint supplement (doi:10.21203/rs.3.rs-9239215/v1)
Supplement: Supplementary file 2 [file f615015b8d1b53f650556423.xlsx]

## Sheet: file explanation
表头名称	描述
ID	该物质在本次定性分析中的唯一数据编号
MS2 name	二级质谱定性匹配分析得到的物质名称
MS2 score	二级匹配的打分，越大越好
level	定性物质等级
MS1 name	一级碎片离子匹配的名称，参考HMDB数据库或KEGG数据库
MS1 ppm	一级匹配的精确度，取值(-25, 25)，越接近0越好
mz	物质特征离子的质荷比
rt	该物质的色谱保留时间
type	采集模式
VIP	该物质在该组对比的OPLS-DA模型得到的变量投影重要度
P-Value	该物质在该组对比的t检验得到的P值，P值 = 假设是正确但是被拒绝的概率 = 阴性结果个数/结果总个数，是对与样本数据的一个检验概率
Q-Value	假设检验统计量（P值）经多重假设检验校正之后的结果，Q值 = 被拒绝但却是正确的概率 = 假阳性结果个数/推测为阳性结果的个数，是对统计检验得到的推论的一种检验概率，对P值的再统计
Fold_Change	该物质在该组对比两组实验间的倍数关系
Log_Foldchange	Fold_Change取以2为底的对数
Group	对比组名称
Feature_all	检测Feature总数
Feature_diff	该组对比差异Feature个数
Feature_diff_up	该组对比上调差异Feature个数
Feature_diff_down	该组对比下调差异Feature个数
Cpd_all	检测物质总数
Cpd_diff	该组对比差异物质个数
Cpd_diff_up	该组对比上调差异物质个数
Cpd_diff_down	该组对比下调差异物质个数
Formula	该物质的化学组成
HMDB	该物质在HMDB数据库中的索引
Chinese.Name	该物质在数据库中的中文名称
CAS	该物质的CAS号
KEGG COMPOUND ID	该物质在KEGG COMPOUND数据库中的索引
Super.Class	该物质的一级分类
Superclass.Chinese	该物质的一级分类中文名
Class	该物质的二级分类
Class.Chinese	该物质的二级分类中文名
Sub.Class	该物质的三级分类
Subclass.Chinese	该物质的三级分类中文名
INCHIKEY	物质INCHIKEY号,可通过输入物质INCHIKEY在Pubchem网站(https://pubchem.ncbi.nlm.nih.gov/)查询物质详细信息
HYZ50R_Control_2	H9R_CK_2样品相对定量值
HYZ50R_Control_4	H9R_CK_4样品相对定量值
HYZ50R_Control_5	H9R_CK_5样品相对定量值
Mean HYZ50R_Control	H9R_CK样本重复实验的相对定量值均值
HYZ50R_Treatmen_1	H9R_T2_1样品相对定量值
HYZ50R_Treatmen_2	H9R_T2_2样品相对定量值
HYZ50R_Treatmen_6	H9R_T2_6样品相对定量值
Mean H9R_T2	H9R_T2样本重复实验的相对定量值均值
ZS6R_Control_2	Z9R_CK_2样品相对定量值
ZS6R_Control_4	Z9R_CK_4样品相对定量值
ZS6R_Control_5	Z9R_CK_5样品相对定量值
Mean ZS6R_Control	Z9R_CK样本重复实验的相对定量值均值
ZS6R_Treatment_2	Z9R_T2_2样品相对定量值
ZS6R_Treatment_3	Z9R_T2_3样品相对定量值
ZS6R_Treatment_6	Z9R_T2_6样品相对定量值
Mean ZS6R_Treatment	Z9R_T2样本重复实验的相对定量值均值
	本次差异代谢物筛选条件为VIP大于1且P-Value小于0.05

## Sheet: ZS6R_ControlvsZS6R_Treatment
ID	MS2 name	MS2 score	level	MS1 name	MS1 ppm	mz	rt	type	Formula	HMDB	CAS	KEGG COMPOUND ID	Super.Class	Superclass.Chinese	Class	Sub.Class	INCHIKEY	ZS6R_Control_2	ZS6R_Control_4	ZS6R_Control_5	MEAN ZS6R_Control_CK	ZS6R_Treatment_2	ZS6R_Treatment_3	ZS6R_Treatment_6	MEAN ZS6R_Treatment	VIP	P-Value	Q-Value	Fold_Change	Log_Foldchange
7	9-Oxo-10(E),12(E)-octadecadienoic acid	3.98	level1			293.212	278.8	NEG	C18H30O3	HMDB0004669	54232-58-5	C14766	Fatty acids	脂肪酸	Fatty Acids and Conjugates	Unsaturated fatty acids	LUZSWWYKKLTDHU-SIGMCMEVSA-N	0.00402896	0.00635053	0.00243983	0.00427311	0.0101533	0.010341	0.018142	0.0128788	1.33373	0.0398635	0.235685	3.01392	1.59164
15	cis-​9,​10-​Epoxystearic acid	3.97	level1			297.243	291.3	NEG	C18H34O3	HMDB0247617	24560-98-3	C19418	Fatty acids	脂肪酸	Octadecanoids	Other Octadecanoids	IMYZYCNQZDBZBQ-UHFFFAOYSA-N	0.000445996	0.000557175	0.000340218	0.000447796	0.00136109	0.00142325	0.00170868	0.00149767	1.50202	0.0010665	0.0791595	3.34454	1.74181
16	Capric acid	3.97	level1			171.139	275.4	NEG	C10H20O2	HMDB0000511	334-48-5	C01571	Fatty acids	脂肪酸	Fatty Acids and Conjugates	Branched fatty acids	GHVNFZFCNZKVNT-UHFFFAOYSA-N	0.000113304	0.000163235	0.000160082	0.000145541	0.00039266	0.000303621	0.000330226	0.000342169	1.48178	0.00313962	0.106633	2.35102	1.23329
17	Pelargonic acid	3.97	level1			157.123	264.7	NEG	C9H18O2	HMDB0000847	112-05-0	C01601	Fatty acids	脂肪酸	Fatty Acids and Conjugates	Branched fatty acids	FBUKVWPVBMHYJY-UHFFFAOYSA-N	9.19913e-05	0.000108334	0.000112419	0.000104248	0.000180545	0.000140789	0.00017366	0.000164998	1.43524	0.0115641	0.156654	1.58274	0.662426
26	ethyl octanoate	3.96	level1			171.139	275.4	NEG	C10H20O2		106-32-1	C12292	Fatty acids	脂肪酸	Fatty esters	Wax monoesters	YYZUSRORWSJGET-UHFFFAOYSA-N	0.000113304	0.000163235	0.000160082	0.000145541	0.00039266	0.000303621	0.000330226	0.000342169	1.48178	0.00313962	0.106633	2.35102	1.23329
28	(E)-3',6-Disinapoylsucrose	3.96	level1			737.227	183	POS	C34H42O19		139891-98-8		Shikimates and Phenylpropanoids	莽草酸及苯丙酸类	Phenylpropanoids (C6-C3)	Cinnamic acids and derivatives	FHIJMQWMMZEFBL-OPSYHMPNSA-N	8.57278e-06	8.34298e-06	8.50625e-06	8.474e-06	4.75756e-07	5.53682e-07	3.35195e-07	4.54878e-07	1.55023	1.10923e-07	0.00276227	0.0536792	-4.21949
29	10-Undecenoic acid	3.96	level1			183.139	274	NEG	C11H20O2	HMDB0033724	1333-28-4	C13910	Fatty acids	脂肪酸	Fatty Acids and Conjugates	Unsaturated fatty acids	FRPZMMHWLSIFAZ-UHFFFAOYSA-N	1.0173e-05	1.09117e-05	1.16803e-05	1.09217e-05	2.18541e-05	1.77044e-05	1.87648e-05	1.94411e-05	1.51096	0.00295523	0.104709	1.78005	0.831916
30	13(S)-HpOTrE	3.96	level1			291.196	272.2	NEG	C18H30O4	HMDB0301803	67597-26-6	C04785	Fatty acids	脂肪酸	Fatty Acids and Conjugates	Other Octadecanoids	UYQGVDXDXBAABN-FQSPHKRJSA-N	0.00273816	0.0050767	0.00206378	0.00329288	0.00744871	0.00689403	0.0122148	0.00885251	1.31392	0.0442917	0.237455	2.68838	1.42674
39	9-Oxooctadecanoic acid	3.95	level1			297.243	291.3	NEG	C18H34O3	HMDB0030979	4114-74-3		Fatty acids	脂肪酸	Fatty Acids and Conjugates	Other Octadecanoids	KNYQSFOUGYMRDE-UHFFFAOYSA-N	0.000445996	0.000557175	0.000340218	0.000447796	0.00136109	0.00142325	0.00170868	0.00149767	1.50202	0.0010665	0.0791595	3.34454	1.74181
40	LPC(15:0)	3.95	level1			482.323	286.6	POS	C23H48NO7P	HMDB0010381	108273-89-8		Fatty acids	脂肪酸	Glycerophospholipids	Glycerophosphocholines	RJZVWDTYEWCUAR-JOCHJYFZSA-N	2.61368e-05	1.69464e-05	2.55743e-05	2.28859e-05	7.36141e-05	5.95479e-05	4.98443e-05	6.10021e-05	1.46723	0.00711645	0.13592	2.66549	1.4144
45	Undecanoic acid	3.95	level1			185.154	284.9	NEG	C11H22O2	HMDB0000947	112-37-8	C17715	Fatty acids	脂肪酸	Fatty Acids and Conjugates	Branched fatty acids	ZDPHROOEEOARMN-UHFFFAOYSA-N	0.000100204	0.00016046	0.000157795	0.000139487	0.000409287	0.00033482	0.000237805	0.000327304	1.3798	0.0245047	0.199845	2.34649	1.23051
46	16-Hydroxypalmitic acid	3.95	level1			271.228	278.9	NEG	C16H32O3	HMDB0006294	506-13-8	C18218	Fatty acids	脂肪酸	Fatty Acids and Conjugates	Hydroxy fatty acids	UGAGPNKCDRTDHP-UHFFFAOYSA-N	6.41022e-05	0.000192044	0.00012222	0.000126122	0.000278633	0.000327046	0.000387545	0.000331075	1.31177	0.013494	0.164036	2.62503	1.39234
50	3-hydroxy-2-[(Z)-oct-2-enyl]pentanedioic acid	3.95	level1			239.129	250.8	NEG	C13H22O5				Fatty acids	脂肪酸	Fatty Acids and Conjugates	Dicarboxylic acids	XULHQOQSIFECQQ-SREVYHEPSA-N	4.82188e-05	5.26136e-05	5.39686e-05	5.16003e-05	7.50116e-05	6.20126e-05	8.19637e-05	7.2996e-05	1.38833	0.0247153	0.200434	1.41464	0.500436
52	5-Hydroxyvalproic acid	3.95	level1			159.102	184.3	NEG	C8H16O3	HMDB0013898	53660-23-4	C16650	Fatty acids	脂肪酸	Fatty Acids and Conjugates	Hydroxy fatty acids	ZIWBCJXKYKOLJK-UHFFFAOYSA-N	2.12314e-05	6.18564e-05	3.1309e-05	3.81322e-05	0.000161254	0.000109838	0.000181043	0.000150712	1.40184	0.0100455	0.149104	3.95235	1.98271
54	Salicylic acid	3.95	level1			137.024	169.9	NEG	C7H6O3	HMDB0001895	69-72-7	C00805	Shikimates and Phenylpropanoids	莽草酸及苯丙酸类	Phenolic acids (C6-C1)	Simple phenolic acids	YGSDEFSMJLZEOE-UHFFFAOYSA-N	8.01604e-05	0.000100223	9.51893e-05	9.18576e-05	6.12935e-05	5.71418e-05	3.60195e-05	5.1485e-05	1.34063	0.0150038	0.169688	0.560487	-0.835248
55	Indolelactic acid	3.95	level1			204.066	169.7	NEG	C11H11NO3	HMDB0000671	1821-52-9	C02043	Alkaloids	生物碱	Tryptophan alkaloids	Simple indole alkaloids	XGILAAMKEQUXLS-UHFFFAOYSA-N	9.48638e-05	6.60443e-05	9.01215e-05	8.36765e-05	2.36913e-05	2.22265e-05	1.52477e-05	2.03885e-05	1.50854	0.0024307	0.099285	0.243659	-2.03706
58	Propionic acid	3.95	level1			73.0294	27.9	NEG	C3H6O2	HMDB0000237	79-09-4	C00163	Fatty acids	脂肪酸	Fatty Acids and Conjugates	Branched fatty acids	XBDQKXXYIPTUBI-UHFFFAOYSA-N	0.000707206	0.00109185	0.000685942	0.000828332	0.000330898	0.00040641	0.000231728	0.000323012	1.41929	0.0232283	0.196347	0.389954	-1.35862
64	Tris(2,4-di-tert-butylphenyl)phosphate	3.94	level1			663.452	332.7	POS	C42H63O4P		31570-04-4		Shikimates and Phenylpropanoids	莽草酸及苯丙酸类	Flavonoids	Flavanones	AZSKHRTUXHLAHS-UHFFFAOYSA-N	0.000582309	0.000448712	0.000546742	0.000525921	0.000699325	0.000772112	0.000667139	0.000712858	1.35002	0.0209301	0.189575	1.35545	0.438769
68	13(S)-HODE	3.94	level1			295.228	280.9	NEG	C18H32O3	HMDB0004667	29623-28-7	C14762	Fatty acids	脂肪酸	Octadecanoids	Other Octadecanoids	HNICUWMFWZBIFP-IRQZEAMPSA-N	0.00123377	0.00351967	0.00137608	0.00204317	0.00900002	0.00769802	0.0126899	0.00979599	1.42119	0.00967285	0.147613	4.7945	2.26138
69	ethyl 2,2-dimethyl-3-(2-methylprop-1-enyl)cyclopropanecarboxylate	3.94	level1			195.139	250.8	NEG	C12H20O2		97-41-6		Terpenoids	萜类	Monoterpenoids	Acyclic monoterpenoids	VIMXTGUGWLAOFZ-UHFFFAOYSA-N	3.07658e-05	3.27784e-05	3.46411e-05	3.27284e-05	4.94476e-05	4.18591e-05	5.54215e-05	4.89094e-05	1.42979	0.0166054	0.175337	1.4944	0.57957
72	Isocaproic acid	3.94	level1			115.076	219.2	NEG	C6H12O2	HMDB0000689	646-07-1	C21399	Fatty acids	脂肪酸	Fatty Acids and Conjugates	Branched fatty acids	FGKJLKRYENPLQH-UHFFFAOYSA-N	5.85474e-05	9.85061e-05	6.70513e-05	7.47016e-05	0.000158527	0.000114959	0.000209657	0.000161048	1.32852	0.0448458	0.237455	2.15588	1.10828
74	Desaminotyrosine	3.94	level1			165.055	142.8	NEG	C9H10O3	HMDB0002199	501-97-3	C01744	Shikimates and Phenylpropanoids	莽草酸及苯丙酸类			NMHMNPHRMNGLLB-UHFFFAOYSA-N	9.76241e-06	1.01791e-05	1.1382e-05	1.04412e-05	5.66083e-06	7.03809e-06	7.43017e-06	6.70969e-06	1.43037	0.00671323	0.132574	0.642619	-0.637964
76	(Z)-2-oct-7-enylpent-2-enedioic acid	3.93	level1			239.129	250.8	NEG	C13H20O4				Fatty acids	脂肪酸	Fatty Acids and Conjugates	Dicarboxylic acids	IQDBNCDDNJCNDB-LUAWRHEFSA-N	4.82188e-05	5.26136e-05	5.39686e-05	5.16003e-05	7.50116e-05	6.20126e-05	8.19637e-05	7.2996e-05	1.38833	0.0247153	0.200434	1.41464	0.500436
80	1-Deoxypebrolide	3.93	level1			415.21	252.7	POS	C24H30O6				Terpenoids	萜类	Sesquiterpenoids	Secoeudesmane sesquiterpenoids	BSWUIXDTVUMMOD-MGPCUXBTSA-N	0.00041896	0.00040207	0.000507004	0.000442678	0.000535154	0.000606657	0.000528321	0.000556711	1.26894	0.0499541	0.240607	1.2576	0.33067
85	hexyl hexanoate	3.93	level1			199.17	293.9	NEG	C12H24O2		6378-65-0		Fatty acids	脂肪酸	Fatty esters	Wax monoesters	NCDCLPBOMHPFCV-UHFFFAOYSA-N	0.000850977	0.00135946	0.00112164	0.00111069	0.00215451	0.00193917	0.00205584	0.00204984	1.42128	0.00416228	0.114164	1.84555	0.884052
86	Octadecanedioic acid	3.93	level1			313.238	289	NEG	C18H34O4	HMDB0000782	871-70-5		Fatty acids	脂肪酸	Fatty Acids and Conjugates	Dicarboxylic acids	BNJOQKFENDDGSC-UHFFFAOYSA-N	2.72051e-05	5.05041e-05	3.26205e-05	3.67766e-05	5.15586e-05	6.79991e-05	7.58464e-05	6.51347e-05	1.2488	0.0475844	0.237455	1.77109	0.82464
89	Salidroside	3.93	level1			299.113	137.7	NEG	C14H20O7		10338-51-9	C06046	Shikimates and Phenylpropanoids	莽草酸及苯丙酸类	Phenylethanoids (C6-C2)	Phenylethanoids	ILRCGYURZSFMEG-RKQHYHRCSA-N	0.000182389	0.000208974	0.000141551	0.000177638	1.27517e-05	3.44026e-05	1.14721e-05	1.95421e-05	1.49139	0.00165846	0.089211	0.110011	-3.18428
90	(2R)-6-Oxo-2-piperidinecarboxylic acid	3.93	level1			142.051	26.9	NEG	C6H9NO3	HMDB0061705	72002-30-3		Amino acids and Peptides	氨基酸及短肽	Small peptides	Aminoacids	FZXCPFJMYOQZCA-SCSAIBSYSA-N	0.000125925	0.000138647	0.000173601	0.000146057	9.13846e-05	0.000102706	0.000107172	0.000100421	1.33972	0.0383676	0.233572	0.687544	-0.540475
91	(E)-11-hydroxyoctadec-9-enoic acid	3.92	level1			297.243	291.3	NEG	C18H34O3				Fatty acids	脂肪酸	Octadecanoids	Other Octadecanoids	MHBZYZVYSHCDLI-NTCAYCPXSA-N	0.000445996	0.000557175	0.000340218	0.000447796	0.00136109	0.00142325	0.00170868	0.00149767	1.50202	0.0010665	0.0791595	3.34454	1.74181
92	4-Ethyloctanoic acid	3.92	level1			171.139	275.4	NEG	C10H20O2				Fatty acids	脂肪酸	Fatty Acids and Conjugates	Branched fatty acids	PWKJMPFEQOHBAC-UHFFFAOYSA-N	0.000113304	0.000163235	0.000160082	0.000145541	0.00039266	0.000303621	0.000330226	0.000342169	1.48178	0.00313962	0.106633	2.35102	1.23329
105	(E)-5-(1,2,4a,5-tetramethyl-2,3,4,7,8,8a-hexahydronaphthalen-1-yl)-3-methyl-pent-2-enoic acid	3.92	level1			303.233	310.4	NEG	C20H32O2				Terpenoids	萜类	Diterpenoids	Colensane and Clerodane diterpenoids	NLVMTSRTOGOFQD-BUHFOSPRSA-N	0.000249826	0.000547722	0.000435976	0.000411174	0.000849123	0.000720856	0.0008925	0.000820826	1.30129	0.0154082	0.171596	1.9963	0.997326
108	Palmitic acid	3.92	level1			255.232	298.5	NEG	C16H32O2	HMDB0000220	57-10-3	C00249	Fatty acids	脂肪酸	Fatty Acids and Conjugates	Branched fatty acids	IPCSVZSSVZVIGE-UHFFFAOYSA-N	0.000217506	0.000230351	0.000265981	0.000237946	0.000308273	0.000312049	0.000350213	0.000323511	1.41871	0.0123052	0.159576	1.3596	0.443182
109	4-tert-Octylphenol	3.92	level1			205.16	286.7	NEG	C14H22O	HMDB0013825	140-66-9	C14205					ISAVYTVYFVQUDY-UHFFFAOYSA-N	0.000233088	0.000249194	0.00027902	0.000253767	0.000376151	0.000306738	0.000339776	0.000340889	1.38199	0.0225847	0.194912	1.34331	0.425793
110	2-Methylheptanoic acid	3.92	level1			143.107	248.8	NEG	C8H16O2				Fatty acids	脂肪酸	Fatty Acids and Conjugates	Branched fatty acids	NKBWMBRPILTCRD-UHFFFAOYSA-N	0.000158242	0.000221588	0.000194954	0.000191595	0.000388092	0.000302967	0.000398319	0.000363126	1.44257	0.00833767	0.141156	1.89528	0.922412
112	2-Methylcaproic acid	3.92	level1			129.092	237.9	NEG	C7H14O2				Fatty acids	脂肪酸	Fatty Acids and Conjugates	Branched fatty acids	CVKMFSAVYPAZTQ-UHFFFAOYSA-N	1.28063e-05	1.92908e-05	1.50131e-05	1.57034e-05	3.87173e-05	2.97615e-05	4.54289e-05	3.79692e-05	1.45157	0.0106223	0.152052	2.4179	1.27376
117	Azelaic acid	3.92	level1			187.097	200.3	NEG	C9H16O4	HMDB0000784	123-99-9	C08261	Fatty acids	脂肪酸	Fatty Acids and Conjugates	Dicarboxylic acids	BDJRBEYXGGNYIS-UHFFFAOYSA-N	0.000165127	0.000415915	0.00018394	0.000254994	0.000810541	0.000575934	0.00113443	0.000840303	1.35216	0.0317985	0.219481	3.29538	1.72045
119	Isovaleric acid	3.92	level1			101.061	166.9	NEG	C5H10O2	HMDB0000718	503-74-2	C08262	Fatty acids	脂肪酸	Fatty Acids and Conjugates	Branched fatty acids	GWYFCOCPABKNJV-UHFFFAOYSA-N	0.000131843	0.00017578	9.58608e-05	0.000134495	1.83843e-05	3.56531e-05	2.18282e-05	2.52885e-05	1.49345	0.00997707	0.148808	0.188026	-2.41099
120	N-Acetylphenylalanine	3.92	level1			206.082	154.2	NEG	C11H13NO3	HMDB0000512	2018-61-3	C03519	Amino acids and Peptides	氨基酸及短肽	Small peptides	Dipeptides	CBQJSKKFNMDLON-JTQLQIEISA-N	9.95535e-05	0.000125123	0.000123395	0.000116024	5.65851e-05	4.64008e-05	2.49943e-05	4.26601e-05	1.40172	0.00413439	0.114036	0.367683	-1.44346
121	Actarit	3.92	level1			192.066	153.9	NEG	C10H11NO3	HMDB0247976	18699-02-0	D01395	Amino acids and Peptides	氨基酸及短肽	Small peptides	Aminoacids	MROJXXOCABQVEF-UHFFFAOYSA-N	1.1095e-05	1.26707e-05	1.37148e-05	1.24935e-05	9.67105e-06	8.89864e-06	7.37787e-06	8.64919e-06	1.36549	0.0194127	0.184567	0.692293	-0.530545
122	Leu-Val	3.92	level1			229.155	35.1	NEG	C11H22N2O3	HMDB0028942	13588-95-9		Amino acids and Peptides	氨基酸及短肽	Small peptides	Dipeptides	MDSUKZSLOATHMH-IUCAKERBSA-N	1.1842e-05	2.04392e-05	1.57073e-05	1.59962e-05	6.3798e-05	3.93909e-05	8.71285e-05	6.34391e-05	1.44117	0.0275872	0.208575	3.96589	1.98765
130	(10E,12E)-9-hydroxyoctadeca-10,12-dienoic acid	3.91	level1			295.228	280.9	NEG	C18H32O3		15514-85-9|115185-06-3		Fatty acids	脂肪酸	Octadecanoids	Other Octadecanoids	NPDSHTNEKLQQIJ-SIGMCMEVSA-N	0.00123377	0.00351967	0.00137608	0.00204317	0.00900002	0.00769802	0.0126899	0.00979599	1.42119	0.00967285	0.147613	4.7945	2.26138
131	Caproic acid	3.91	level1			115.076	219.2	NEG	C6H12O2	HMDB0000535	142-62-1	C01585	Fatty acids	脂肪酸	Fatty Acids and Conjugates	Branched fatty acids	FUZZWVXGSFPDMH-UHFFFAOYSA-N	5.85474e-05	9.85061e-05	6.70513e-05	7.47016e-05	0.000158527	0.000114959	0.000209657	0.000161048	1.32852	0.0448458	0.237455	2.15588	1.10828
132	2-Phenyllactic acid	3.91	level1			165.055	142.8	NEG	C9H10O3	HMDB0142137	515-30-0		Shikimates and Phenylpropanoids	莽草酸及苯丙酸类			NWCHELUCVWSRRS-UHFFFAOYSA-N	9.76241e-06	1.01791e-05	1.1382e-05	1.04412e-05	5.66083e-06	7.03809e-06	7.43017e-06	6.70969e-06	1.43037	0.00671323	0.132574	0.642619	-0.637964
133	Dodecanoic acid	3.91	level1			199.17	293.9	NEG	C12H24O2	HMDB0000638	143-07-7	C02679	Fatty acids	脂肪酸	Fatty Acids and Conjugates	Branched fatty acids	POULHZVOKOAJMA-UHFFFAOYSA-N	0.000850977	0.00135946	0.00112164	0.00111069	0.00215451	0.00193917	0.00205584	0.00204984	1.42128	0.00416228	0.114164	1.84555	0.884052
135	Valproic acid	3.91	level1			143.107	248.8	NEG	C8H16O2	HMDB0001877	99-66-1	C07185	Fatty acids	脂肪酸	Fatty Acids and Conjugates	Branched fatty acids	NIJJYAXOARWZEE-UHFFFAOYSA-N	0.000158242	0.000221588	0.000194954	0.000191595	0.000388092	0.000302967	0.000398319	0.000363126	1.44257	0.00833767	0.141156	1.89528	0.922412
141	LPE(16:0)	3.91	level1			452.278	297.2	NEG	C21H44NO7P	HMDB0011503	53862-35-4		Fatty acids	脂肪酸	Glycerophospholipids	Glycerophosphoethanolamines	YVYMBNSKXOXSKW-HXUWFJFHSA-N	0.000170968	0.000193634	0.000236778	0.00020046	0.000466588	0.000366412	0.000468714	0.000433905	1.48875	0.00387296	0.112629	2.16455	1.11406
146	beta-Chamigrenic acid	3.91	level1			233.154	268.9	NEG	C15H22O2				Terpenoids	萜类	Sesquiterpenoids	Chamigrane sesquiterpenoids	TYVCBWCQQAMFRG-UHFFFAOYSA-N	4.62201e-05	6.04303e-05	6.2617e-05	5.64225e-05	0.000100397	7.03151e-05	9.10068e-05	8.72395e-05	1.3071	0.039861	0.235685	1.54618	0.628711
147	Sebacic acid	3.91	level1			201.113	214.8	NEG	C10H18O4	HMDB0000792	111-20-6	C08277	Fatty acids	脂肪酸	Fatty Acids and Conjugates	Dicarboxylic acids	CXMXRPHRNRROMY-UHFFFAOYSA-N	1.75328e-05	2.97984e-05	1.80615e-05	2.17976e-05	5.36297e-05	3.39501e-05	4.01091e-05	4.2563e-05	1.3069	0.0422884	0.237455	1.95265	0.965431
148	3-Hydroxyoctanoic acid	3.91	level1			159.102	213.3	NEG	C8H16O3	HMDB0001954	14292-27-4	C20793	Fatty acids	脂肪酸	Fatty Acids and Conjugates	Hydroxy fatty acids	NDPLAKGOSZHTPH-UHFFFAOYSA-N	4.12385e-06	7.53787e-06	6.55234e-06	6.07135e-06	1.70745e-05	1.10764e-05	1.75481e-05	1.5233e-05	1.39216	0.016753	0.175774	2.509	1.32711
149	Butyllactate	3.91	level1			145.087	202.7	NEG	C7H14O3	HMDB0040254	138-22-7		Fatty acids	脂肪酸	Fatty esters	Wax monoesters	MRABAEUHTLLEML-UHFFFAOYSA-N	1.32059e-05	2.11259e-05	2.04683e-05	1.82667e-05	3.44574e-05	2.97296e-05	4.24292e-05	3.55387e-05	1.37244	0.0183698	0.180599	1.94554	0.960173
155	Phenylalanine	3.91	level1			164.071	33.7	NEG	C9H11NO2	HMDB0000159	63-91-2	C00079	Amino acids and Peptides	氨基酸及短肽	Small peptides	Aminoacids	COLNVLDHVKWLRT-QMMMGPOBSA-N	0.000284963	0.000143422	0.000273544	0.000233976	0.00052074	0.000772984	0.000630866	0.00064153	1.40884	0.00903442	0.144388	2.74186	1.45515
157	Itaconic acid	3.91	level1			129.019	25.8	NEG	C5H6O4	HMDB0002092	97-65-4	C00490	Fatty acids	脂肪酸	Fatty Acids and Conjugates	Dicarboxylic acids	LVHBHZANLOWSRM-UHFFFAOYSA-N	0.000139437	0.000162618	0.000216813	0.000172956	0.000337493	0.000256092	0.000252622	0.000282069	1.31781	0.0386839	0.233824	1.63087	0.705641
158	alpha-Ketoglutaric acid (alpha-KG)	3.91	level1			145.014	25.3	NEG	C5H6O5	HMDB0000208	328-50-7	C00026	Fatty acids	脂肪酸	Fatty Acids and Conjugates	Dicarboxylic acids	KPGXRSRHYNQIFN-UHFFFAOYSA-N	0.000116193	0.000158086	0.000139743	0.000138007	0.000109052	4.80612e-05	6.10722e-05	7.27283e-05	1.24355	0.0421317	0.237455	0.526989	-0.924155
160	Sucrose	3.91	level1			341.109	27.2	NEG	C12H22O11	HMDB0000258	57-50-1	C00089	Carbohydrates	碳水化合物	Saccharides	Disaccharides	CZMRCDWAGMRECN-UGDNZRGBSA-N	0.00194077	0.00179271	0.00210461	0.00194603	0.000688353	0.000851923	0.000480672	0.00067365	1.48527	0.000816969	0.0738442	0.346166	-1.53046
164	Caprylic acid	3.9	level1			143.107	248.8	NEG	C8H16O2	HMDB0000482	124-07-2	C06423	Fatty acids	脂肪酸	Fatty Acids and Conjugates	Branched fatty acids	WWZKQHOCKIZLMA-UHFFFAOYSA-N	0.000158242	0.000221588	0.000194954	0.000191595	0.000388092	0.000302967	0.000398319	0.000363126	1.44257	0.00833767	0.141156	1.89528	0.922412
165	Turanose	3.9	level1			341.109	27.2	NEG	C12H22O11		547-25-1		Carbohydrates	碳水化合物	Saccharides	Disaccharides	SEWFWJUQVJHATO-UHFFFAOYSA-N	0.00194077	0.00179271	0.00210461	0.00194603	0.000688353	0.000851923	0.000480672	0.00067365	1.48527	0.000816969	0.0738442	0.346166	-1.53046
167	Butyl isobutyl phthalate	3.9	level1			279.158	276.5	POS	C16H22O4		17851-53-5		Shikimates and Phenylpropanoids	莽草酸及苯丙酸类	Phenolic acids (C6-C1)	Shikimic acids and derivatives	UVIVWIFUPKGWGF-UHFFFAOYSA-N	0.00190726	0.00380421	0.00307696	0.00292948	0.00886425	0.0076981	0.00859898	0.00838711	1.45271	0.00113791	0.0801717	2.86301	1.51753
172	Methyl pentadecanoate	3.9	level1			255.233	323.7	NEG	C16H32O2				Fatty acids	脂肪酸	Fatty esters	Wax monoesters	XIUXKAZJZFLLDQ-UHFFFAOYSA-N	0.00363233	0.00354946	0.0042602	0.00381399	0.00480911	0.00426449	0.00494503	0.00467288	1.28257	0.0484326	0.237455	1.22519	0.29301
173	Stearidonic acid	3.9	level1			275.201	297.9	NEG	C18H28O2	HMDB0006547	20290-75-9	C16300	Fatty acids	脂肪酸	Fatty Acids and Conjugates	Unsaturated fatty acids	JIWBIWFOSCKQMA-LTKCOYKYSA-N	6.2687e-05	0.000107553	7.93705e-05	8.32036e-05	0.000224318	0.000227824	0.00020514	0.000219094	1.47717	0.000795751	0.0738442	2.63323	1.39683
175	2-(1-carboxyethyl)-5-methyl-cyclopentanecarboxylic acid	3.9	level1			199.097	208.4	NEG	C10H16O4		32603-11-5		Amino acids and Peptides	氨基酸及短肽	Small peptides	Aminoacids	OIFCPZGZZQQDNO-UHFFFAOYSA-N	1.76195e-05	1.73052e-05	1.83798e-05	1.77682e-05	1.47186e-05	1.05092e-05	1.30068e-05	1.27449e-05	1.33407	0.016444	0.17492	0.717286	-0.479381
184	2-Hydroxypalmitic acid	3.89	level1			271.228	278.9	NEG	C16H32O3	HMDB0031057	764-67-0		Fatty acids	脂肪酸	Fatty Acids and Conjugates	Hydroxy fatty acids	JGHSBPIZNUXPLA-UHFFFAOYSA-N	6.41022e-05	0.000192044	0.00012222	0.000126122	0.000278633	0.000327046	0.000387545	0.000331075	1.31177	0.013494	0.164036	2.62503	1.39234
187	3,5-Di-tert-butylphenol	3.89	level1			205.16	286.7	NEG	C14H22O		1138-52-9		Shikimates and Phenylpropanoids	莽草酸及苯丙酸类			ZDWSNKPLZUXBPE-UHFFFAOYSA-N	0.000233088	0.000249194	0.00027902	0.000253767	0.000376151	0.000306738	0.000339776	0.000340889	1.38199	0.0225847	0.194912	1.34331	0.425793
190	Citraconic acid	3.89	level1			129.019	25.8	NEG	C5H6O4	HMDB0000634	498-23-7	C02226	Fatty acids	脂肪酸	Fatty Acids and Conjugates	Dicarboxylic acids	HNEGQIOMVPPMNR-IHWYPQMZSA-N	0.000139437	0.000162618	0.000216813	0.000172956	0.000337493	0.000256092	0.000252622	0.000282069	1.31781	0.0386839	0.233824	1.63087	0.705641
191	Palatinose (hydrate)	3.89	level1			341.109	27.2	NEG	C12H22O11		13718-94-0	C01742	Carbohydrates	碳水化合物	Saccharides	Disaccharides	PVXPPJIGRGXGCY-TZLCEDOOSA-N	0.00194077	0.00179271	0.00210461	0.00194603	0.000688353	0.000851923	0.000480672	0.00067365	1.48527	0.000816969	0.0738442	0.346166	-1.53046
192	Galactinol	3.89	level1			341.109	27.2	NEG	C12H22O11		3687-64-7		Carbohydrates	碳水化合物	Polyols	Cyclitols	VCWMRQDBPZKXKG-BJBMSVMHSA-N	0.00194077	0.00179271	0.00210461	0.00194603	0.000688353	0.000851923	0.000480672	0.00067365	1.48527	0.000816969	0.0738442	0.346166	-1.53046
200	(Z)-2-hydroxyoctadec-9-enoic acid	3.89	level1			297.243	311.8	NEG	C18H34O3		56472-29-8		Fatty acids	脂肪酸	Fatty Acids and Conjugates	Hydroxy fatty acids	JBSOOFITVPOOSY-KTKRTIGZSA-N	0.00015291	0.00046483	0.000259289	0.000292343	0.000811228	0.000731752	0.00136342	0.000968799	1.33636	0.036475	0.229605	3.31391	1.72854
207	2-Hydroxyglutaric acid	3.89	level1			147.03	25.8	NEG	C5H8O5	HMDB0000694	13095-48-2	C03196	Fatty acids	脂肪酸	Fatty Acids and Conjugates	Dicarboxylic acids	HWXBTNAVRSUOJR-VKHMYHEASA-N	0.000168722	0.000174464	0.000265903	0.00020303	0.000108393	0.000126508	6.92442e-05	0.000101382	1.29663	0.046633	0.237455	0.499344	-1.00189
210	8-[3-oxo-2-[(E)-pent-2-enyl]cyclopenten-1-yl]octanoic acid	3.88	level1			291.196	272.2	NEG	C18H28O3		93633-61-5		Fatty acids	脂肪酸	Octadecanoids		RHVWQVSLVMXMBR-XVNBXDOJSA-N	0.00273816	0.0050767	0.00206378	0.00329288	0.00744871	0.00689403	0.0122148	0.00885251	1.31392	0.0442917	0.237455	2.68838	1.42674
211	(10Z)-3a,10-dimethyl-1-prop-1-en-2-yl-2,3,4,5,6,7,8,9,12,12a-decahydro-1H-cyclopenta[11]annulene-6-carboxylic acid	3.88	level1			303.233	310.4	NEG	C20H32O2				Terpenoids	萜类	Diterpenoids	Dolabellane diterpenoids	FVDVQQJLECWRKH-NVNXTCNLSA-N	0.000249826	0.000547722	0.000435976	0.000411174	0.000849123	0.000720856	0.0008925	0.000820826	1.30129	0.0154082	0.171596	1.9963	0.997326
212	Val-Ile	3.88	level1			229.155	35.1	NEG	C11H22N2O3	HMDB0029130	20556-14-3		Amino acids and Peptides	氨基酸及短肽	Small peptides	Dipeptides	PNVLWFYAPWAQMU-DJLDLDEBSA-N	1.1842e-05	2.04392e-05	1.57073e-05	1.59962e-05	6.3798e-05	3.93909e-05	8.71285e-05	6.34391e-05	1.44117	0.0275872	0.208575	3.96589	1.98765
214	1,1,9a-trimethyl-3,4,8,9-tetrahydro-2H-benzo[7]annulene-7-carboxylic acid	3.88	level1			233.154	268.9	NEG	C15H22O2				Terpenoids	萜类	Sesquiterpenoids	Cuparane sesquiterpenoids	MQYVSPPZNQTARL-UHFFFAOYSA-N	4.62201e-05	6.04303e-05	6.2617e-05	5.64225e-05	0.000100397	7.03151e-05	9.10068e-05	8.72395e-05	1.3071	0.039861	0.235685	1.54618	0.628711
215	2,10,10-trimethyltricyclo[6.3.0.01,5]undec-6-ene-6-carboxylic acid	3.88	level1			233.154	268.9	NEG	C15H22O2				Terpenoids	萜类	Sesquiterpenoids	Pentalenane sesquiterpenoids	DCFDRCCHOOORSB-UHFFFAOYSA-N	4.62201e-05	6.04303e-05	6.2617e-05	5.64225e-05	0.000100397	7.03151e-05	9.10068e-05	8.72395e-05	1.3071	0.039861	0.235685	1.54618	0.628711
216	(1S,5S,8S,9R)-2,5,9-trimethyltricyclo[6.3.0.01,5]undec-2-ene-3-carboxylic acid	3.88	level1			233.154	268.9	NEG	C15H22O2				Terpenoids	萜类	Sesquiterpenoids	Silphiperfolane sesquiterpenoids	SUFSOKMJLLAQQX-JYBASQMISA-N	4.62201e-05	6.04303e-05	6.2617e-05	5.64225e-05	0.000100397	7.03151e-05	9.10068e-05	8.72395e-05	1.3071	0.039861	0.235685	1.54618	0.628711
217	(3S,4R,5R)-1,3,4,5-tetrahydroxy-6-[(2S,3R,4S,5S,6R)-3,4,5-trihydroxy-6-(hydroxymethyl)tetrahydropyran-2-yl]oxy-hexan-2-one	3.88	level1			341.109	27.2	NEG	C12H22O11		13718-94-0		Carbohydrates	碳水化合物	Saccharides	Disaccharides	RJPPRBMGVWEZRR-WTZPKTTFSA-N	0.00194077	0.00179271	0.00210461	0.00194603	0.000688353	0.000851923	0.000480672	0.00067365	1.48527	0.000816969	0.0738442	0.346166	-1.53046
218	(2R,3S,4R,5R)-2,3,4,5-tetrahydroxy-6-[(2R,3R,4S,5S,6R)-3,4,5-trihydroxy-6-(hydroxymethyl)tetrahydropyran-2-yl]oxy-hexanal	3.88	level1			341.109	27.2	NEG	C12H22O11		554-91-6		Carbohydrates	碳水化合物	Saccharides	Disaccharides	AYRXSINWFIIFAE-UDKQPYHCSA-N	0.00194077	0.00179271	0.00210461	0.00194603	0.000688353	0.000851923	0.000480672	0.00067365	1.48527	0.000816969	0.0738442	0.346166	-1.53046
225	1-Methylpyrrolidine	3.88	level1			86.0962	27.2	POS	C5H11N	HMDB0243946	120-94-5		Alkaloids	生物碱	Lysine alkaloids	Piperidine alkaloids	AVFZOVWCLRSYKC-UHFFFAOYSA-N	0.00126639	0.000528266	0.00125948	0.00101804	0.00207787	0.00234682	0.00277862	0.0024011	1.31509	0.0122688	0.159576	2.35855	1.2379
227	cis-9-Palmitoleic acid	3.88	level1			253.217	311.8	NEG	C16H30O2	HMDB0003229	373-49-9	C08362	Fatty acids	脂肪酸	Fatty Acids and Conjugates	Unsaturated fatty acids	SECPZKHBENQXJG-FPLPWBNLSA-N	0.00381077	0.00465847	0.00309349	0.00385424	0.00840611	0.00691416	0.00868133	0.00800053	1.45399	0.00431475	0.114884	2.07577	1.05365
228	Myristic acid	3.88	level1			227.201	309.8	NEG	C14H28O2	HMDB0000806	544-63-8	C06424	Fatty acids	脂肪酸	Fatty Acids and Conjugates	Branched fatty acids	TUNFSRHWOTWDNC-UHFFFAOYSA-N	0.00144676	0.00156698	0.00129172	0.00143515	0.00254915	0.002165	0.0029072	0.00254045	1.46461	0.00843403	0.141232	1.77016	0.823884
229	Docosahexaenoic acid (DHA)	3.88	level1			327.233	308.4	NEG	C22H32O2	HMDB0002183	6217-54-5	C06429	Fatty acids	脂肪酸	Fatty Acids and Conjugates	Unsaturated fatty acids	MBMBGCFOFBJSGT-UHFFFAOYSA-N	0.000170138	0.000306087	0.000282237	0.000252821	7.21173e-05	6.1046e-05	0.000163994	9.90523e-05	1.26411	0.0443359	0.237455	0.391788	-1.35185
232	trans-2-Octenoic acid	3.88	level1			141.092	242	NEG	C8H14O2	HMDB0001568	1871-67-6		Fatty acids	脂肪酸	Fatty Acids and Conjugates	Unsaturated fatty acids	CWMPPVPFLSZGCY-VOTSOKGWSA-N	6.4549e-06	1.17379e-05	9.43839e-06	9.2104e-06	2.473e-05	1.95577e-05	2.81211e-05	2.41363e-05	1.43768	0.00694297	0.134495	2.62055	1.38987
240	Uric acid	3.88	level1			167.021	26.6	NEG	C5H4N4O3	HMDB0000289	69-93-2	C00366	Alkaloids	生物碱	Pseudoalkaloids	Purine alkaloids	LEHOTFFKMJEONL-UHFFFAOYSA-N	8.35069e-05	0.000350716	0.00025501	0.000229745	0.000675559	0.000613567	0.000473253	0.00058746	1.19888	0.0220857	0.193336	2.55701	1.35446
242	Glyceric acid	3.88	level1			105.019	23.9	NEG	C3H6O4	HMDB0000139	6000-40-4	C00258	Fatty acids	脂肪酸	Fatty Acids and Conjugates	Hydroxy fatty acids	RBNPOMFGQQGHHO-UHFFFAOYSA-N	0.000646205	0.000678827	0.00125554	0.00086019	0.000199562	0.000212371	8.72224e-05	0.000166385	1.42926	0.0263612	0.205183	0.193428	-2.37013
244	Hydroxyacetone	3.87	level1			73.0294	27.9	NEG	C3H6O2	HMDB0006961	116-09-6	C05235					XLSMFKSTNGKWQX-UHFFFAOYSA-N	0.000707206	0.00109185	0.000685942	0.000828332	0.000330898	0.00040641	0.000231728	0.000323012	1.41929	0.0232283	0.196347	0.389954	-1.35862
250	Arachidonic acid (AA)	3.87	level1			303.233	310.4	NEG	C20H32O2	HMDB0001043	506-32-1	C00219	Fatty acids	脂肪酸	Fatty Acids and Conjugates	Unsaturated fatty acids	YZXBAPSDXZZRGB-DOFZRALJSA-N	0.000249826	0.000547722	0.000435976	0.000411174	0.000849123	0.000720856	0.0008925	0.000820826	1.30129	0.0154082	0.171596	1.9963	0.997326
252	12-Methyltridecanoic acid	3.87	level1			227.201	309.8	NEG	C14H28O2	HMDB0031072	2724-57-4		Fatty acids	脂肪酸	Fatty Acids and Conjugates	Branched fatty acids	YYVJAABUJYRQJO-UHFFFAOYSA-N	0.00144676	0.00156698	0.00129172	0.00143515	0.00254915	0.002165	0.0029072	0.00254045	1.46461	0.00843403	0.141232	1.77016	0.823884
259	2-Hydroxystearic acid	3.87	level1			299.259	323.2	NEG	C18H36O3	HMDB0062549	26531-80-6	C03045	Fatty acids	脂肪酸	Fatty Acids and Conjugates	Hydroxy fatty acids	KIHBGTRZFAVZRV-UHFFFAOYSA-N	3.06699e-05	7.38044e-05	4.95101e-05	5.13281e-05	0.000110877	8.81743e-05	0.000132985	0.000110679	1.28211	0.029899	0.214267	2.1563	1.10856
260	5Z,8Z,11Z-Eicosatrienoic acid	3.87	level1			305.248	317.7	NEG	C20H34O2	HMDB0010378	20590-32-3	C21938	Fatty acids	脂肪酸	Fatty Acids and Conjugates	Unsaturated fatty acids	UNSRRHDPHVZAHH-YOILPLPUSA-N	0.000117613	0.000209972	0.000120274	0.000149287	0.000261727	0.000231171	0.000239144	0.000244014	1.24525	0.0404157	0.236885	1.63453	0.708877
263	Indole-3-propionic acid	3.87	level1			188.071	210.6	NEG	C11H11NO2	HMDB0002302	830-96-6	C22236	Alkaloids	生物碱	Tryptophan alkaloids	Simple indole alkaloids	GOLXRNDWAUTYKT-UHFFFAOYSA-N	9.47494e-06	8.38946e-06	8.27281e-06	8.7124e-06	6.88845e-06	6.60686e-06	4.86867e-06	6.12133e-06	1.31149	0.0247048	0.200423	0.702599	-0.509226
265	(2E,4E)-2,7-dimethyl-8-[(2R,3R,4S,5S,6R)-3,4,5-trihydroxy-6-(hydroxymethyl)tetrahydropyran-2-yl]oxy-deca-2,4-dienedioic acid	3.87	level1			385.15	198	NEG	C18H28O10		870456-23-8						WHRWRZSKZMYJOX-GCIJFTNRSA-N	8.37539e-05	8.20593e-05	9.10773e-05	8.56302e-05	4.30407e-05	5.06112e-05	3.30749e-05	4.22422e-05	1.4697	0.00168861	0.0897673	0.49331	-1.01943
266	Indole-3-carbinol	3.87	level1			146.061	173	NEG	C9H9NO	HMDB0005785	700-06-1		Alkaloids	生物碱	Tryptophan alkaloids	Simple indole alkaloids	IVYPNXXAYMYVSP-UHFFFAOYSA-N	0.000228408	0.000183068	0.000208234	0.00020657	9.95032e-05	9.6615e-05	6.8494e-05	8.82041e-05	1.48506	0.00196603	0.0933758	0.426994	-1.22771
269	Guanine	3.87	level1			150.042	27.1	NEG	C5H5N5O	HMDB0000132	73-40-5	C00242	Alkaloids	生物碱	Pseudoalkaloids	pteridine alkaloids	UYTPUPDQBNUYGX-UHFFFAOYSA-N	0.000383317	0.000342235	0.00046496	0.000396837	8.55242e-06	9.93605e-06	1.73196e-05	1.1936e-05	1.54141	0.00838018	0.141211	0.0300779	-5.05515
272	Glutamate	3.87	level1			146.046	23.8	NEG	C5H9NO4	HMDB0000148	56-86-0	C00025	Amino acids and Peptides	氨基酸及短肽	Small peptides	Aminoacids	WHUUTDBJXJRKMK-VKHMYHEASA-N	0.000986094	0.00064027	0.000884729	0.000837031	0.000586413	0.000509869	0.000482103	0.000526128	1.30854	0.0441977	0.237455	0.628565	-0.669866
276	2-Methylhippuric acid	3.86	level1			192.066	153.9	NEG	C10H11NO3	HMDB0011723	27115-50-0		Amino acids and Peptides	氨基酸及短肽	Small peptides	Aminoacids	YOEBAVRJHRCKRE-UHFFFAOYSA-N	1.1095e-05	1.26707e-05	1.37148e-05	1.24935e-05	9.67105e-06	8.89864e-06	7.37787e-06	8.64919e-06	1.36549	0.0194127	0.184567	0.692293	-0.530545
277	(E)-5-(2,3-dimethyl-3-tricyclo[2.2.1.02,6]heptanyl)-2-methyl-pent-2-enoic acid	3.86	level1			233.154	268.9	NEG	C15H22O2		74642-79-8		Terpenoids	萜类	Sesquiterpenoids	Santalane sesquiterpenoids	NZSCHTYUGUVLHG-WEVVVXLNSA-N	4.62201e-05	6.04303e-05	6.2617e-05	5.64225e-05	0.000100397	7.03151e-05	9.10068e-05	8.72395e-05	1.3071	0.039861	0.235685	1.54618	0.628711
281	LPC(18:0/0:0)	3.86	level1			524.37	310.2	POS	C26H54NO7P	HMDB0010384	19420-57-6		Fatty acids	脂肪酸	Glycerophospholipids	Glycerophosphocholines	IHNKQIMGVNPMTC-RUZDIDTESA-N	0.000108124	0.000101806	8.76944e-05	9.92082e-05	0.000370044	0.000293126	0.000440371	0.000367847	1.52621	0.0223323	0.194292	3.70783	1.89058
291	Paullinic acid	3.86	level1			309.279	338.3	NEG	C20H38O2				Fatty acids	脂肪酸	Fatty Acids and Conjugates	Unsaturated fatty acids	URXZXNYJPAJJOQ-FPLPWBNLSA-N	6.49965e-06	1.34299e-05	2.35661e-06	7.4287e-06	2.3766e-05	1.91332e-05	2.09244e-05	2.12745e-05	1.20339	0.0167413	0.175766	2.86383	1.51794
292	(10E,15Z)-9,12,13-trihydroxyoctadeca-10,15-dienoic acid	3.86	level1			327.217	226.5	NEG	C18H32O5		185147-97-1		Fatty acids	脂肪酸	Octadecanoids	Other Octadecanoids	MKYUCBXUUSZMQB-MKZMYESJSA-N	0.00263659	0.00597497	0.00264679	0.00375279	0.0128177	0.00873439	0.0117982	0.0111168	1.37852	0.0112582	0.155284	2.96227	1.5667
301	Serine	3.86	level1			104.035	23.1	NEG	C3H7NO3	HMDB0000187	56-45-1	C00065	Amino acids and Peptides	氨基酸及短肽	Small peptides	Aminoacids	MTCFGRXMJLQNBG-REOHCLBHSA-N	0.000261363	0.000174674	0.000231674	0.00022257	8.77018e-05	9.9802e-05	9.54718e-05	9.43252e-05	1.48919	0.0350022	0.226008	0.4238	-1.23855
302	(E)-6-hydroxyoctadec-4-enoic acid	3.85	level1			297.243	291.3	NEG	C18H34O3				Fatty acids	脂肪酸	Octadecanoids	Other Octadecanoids	SCZSILIHRULXII-NTCAYCPXSA-N	0.000445996	0.000557175	0.000340218	0.000447796	0.00136109	0.00142325	0.00170868	0.00149767	1.50202	0.0010665	0.0791595	3.34454	1.74181
303	cis-8,11,14-Eicosatrienoic acid	3.85	level1			305.248	317.7	NEG	C20H34O2	HMDB0002925	135625-06-8	C03242	Fatty acids	脂肪酸	Fatty Acids and Conjugates	Unsaturated fatty acids	HOBAELRKJCKHQD-QNEBEIHSSA-N	0.000117613	0.000209972	0.000120274	0.000149287	0.000261727	0.000231171	0.000239144	0.000244014	1.24525	0.0404157	0.236885	1.63453	0.708877
304	2-Hydroxyadenine	3.85	level1			150.042	27.1	NEG	C5H5N5O	HMDB0000403	3373-53-3		Alkaloids	生物碱	Pseudoalkaloids	Purine alkaloids	DRAVOWXCEBXPTN-UHFFFAOYSA-N	0.000383317	0.000342235	0.00046496	0.000396837	8.55242e-06	9.93605e-06	1.73196e-05	1.1936e-05	1.54141	0.00838018	0.141211	0.0300779	-5.05515
305	Fructose 2-phosphate	3.85	level1			259.022	29.1	NEG	C6H13O9P	HMDB0006800	108102-98-3	C03267	Carbohydrates	碳水化合物	Saccharides	Monosaccharides	PMTUDJVZIGZBIX-ZXXMMSQZSA-N	0.000388211	0.000223554	0.000302269	0.000304678	0.00015958	0.000175564	9.68672e-05	0.000144004	1.30882	0.0393057	0.234875	0.472642	-1.08118
306	Fructose 6-phosphate	3.85	level1			259.022	29.1	NEG	C6H13O9P	HMDB0003971	643-13-0	C05345	Carbohydrates	碳水化合物	Saccharides	Monosaccharides	BGWGXPAPYGQALX-ARQDHWQXSA-N	0.000388211	0.000223554	0.000302269	0.000304678	0.00015958	0.000175564	9.68672e-05	0.000144004	1.30882	0.0393057	0.234875	0.472642	-1.08118
307	Mannose 6-phosphate	3.85	level1			259.022	29.1	NEG	C6H13O9P	HMDB0001078	3672-15-9	C00275	Carbohydrates	碳水化合物	Saccharides	Monosaccharides	NBSCHQHZLSJFNQ-RWOPYEJCSA-N	0.000388211	0.000223554	0.000302269	0.000304678	0.00015958	0.000175564	9.68672e-05	0.000144004	1.30882	0.0393057	0.234875	0.472642	-1.08118
310	Azetidine-2-carboxylic acid	3.85	level1			102.055	27.8	POS	C4H7NO2	HMDB0029615	2133-34-8		Amino acids and Peptides	氨基酸及短肽	Small peptides	Aminoacids	IADUEWIQBXOCDZ-UHFFFAOYSA-N	0.00135071	0.000979112	0.000947174	0.00109233	0.000411577	0.00054066	0.000360769	0.000437669	1.47009	0.0095101	0.146972	0.400673	-1.3195
311	Pentadecanoic acid	3.85	level1			241.217	317	NEG	C15H30O2	HMDB0000826	1002-84-2	C16537	Fatty acids	脂肪酸	Fatty Acids and Conjugates	Branched fatty acids	WQEPLUUGTLDZJY-UHFFFAOYSA-N	0.000777996	0.00104253	0.000668698	0.000829743	0.0020513	0.00156846	0.00187286	0.00183087	1.45069	0.00505571	0.121607	2.20656	1.1418
312	3-Hydroxylauric acid	3.85	level1			197.154	282.8	NEG	C12H24O3	HMDB0000387	45162-48-9		Fatty acids	脂肪酸	Fatty Acids and Conjugates	Hydroxy fatty acids	MUCMKTPAZLSKTL-NSHDSACASA-N	1.53517e-05	2.73439e-05	2.41379e-05	2.22778e-05	4.89901e-05	3.48379e-05	3.46986e-05	3.95089e-05	1.26837	0.0441548	0.237455	1.77346	0.826567
313	(E)-2-methylpent-2-enoic acid	3.85	level1			113.061	209.5	NEG	C6H10O2		16957-70-3		Fatty acids	脂肪酸	Fatty Acids and Conjugates	Unsaturated fatty acids	JJYWRQLLQAKNAD-SNAWJCMRSA-N	3.44497e-06	1.22509e-05	6.93058e-06	7.54216e-06	1.86929e-05	1.39482e-05	1.72571e-05	1.66327e-05	1.19499	0.0357771	0.227868	2.2053	1.14098
315	4-[[(3R,4R,5S)-5-(4-hydroxy-3-methoxy-phenyl)-4-(hydroxymethyl)tetrahydrofuran-3-yl]methyl]-2-methoxy-phenol	3.85	level1			359.15	190.8	NEG	C20H24O6		27003-73-2	C10646	Shikimates and Phenylpropanoids	莽草酸及苯丙酸类	Lignans	Furanoid lignans	MHXCIKYXNYCMHY-AUSJPIAWSA-N	3.30868e-05	3.67743e-05	5.00856e-05	3.99822e-05	2.11934e-05	1.53308e-05	1.10878e-05	1.58706e-05	1.40188	0.0153242	0.171243	0.396942	-1.333
319	3-[2-methoxy-3-[(2S,3R,4S,5S,6R)-3,4,5-trihydroxy-6-(hydroxymethyl)tetrahydropyran-2-yl]oxy-phenyl]propanoic acid	3.85	level1			357.119	150.8	NEG	C16H22O9				Shikimates and Phenylpropanoids	莽草酸及苯丙酸类			VLHQGQCFFBCKMV-RSQMQNDGSA-N	0.000158402	9.79596e-05	8.13581e-05	0.000112573	3.19422e-05	3.6818e-05	1.66109e-05	2.8457e-05	1.42365	0.0254102	0.202682	0.252787	-1.98401
326	S-Methylcysteine sulfoxide	3.85	level1			150.023	23.2	NEG	C4H9NO3S	HMDB0029432	6853-87-8		Amino acids and Peptides	氨基酸及短肽	Small peptides	Aminoacids	ZZLHPCSGGOGHFW-UHFFFAOYSA-N	0.000568704	0.000666115	0.000670751	0.00063519	0.000145144	0.000298438	0.000216272	0.000219951	1.45381	0.00169422	0.0899917	0.346277	-1.53
336	[3,4,5-trihydroxy-5-(hydroxymethyl)tetrahydrofuran-2-yl]methyl dihydrogen phosphate	3.84	level1			259.022	29.1	NEG	C6H13O9P		26177-86-6		Carbohydrates	碳水化合物	Saccharides	Monosaccharides	BGWGXPAPYGQALX-UHFFFAOYSA-N	0.000388211	0.000223554	0.000302269	0.000304678	0.00015958	0.000175564	9.68672e-05	0.000144004	1.30882	0.0393057	0.234875	0.472642	-1.08118
337	Mannose 1-phosphate	3.84	level1			259.022	29.1	NEG	C6H13O9P	HMDB0006330	27251-84-9	C00636	Carbohydrates	碳水化合物	Saccharides	Monosaccharides	HXXFSFRBOHSIMQ-QTVWNMPRSA-N	0.000388211	0.000223554	0.000302269	0.000304678	0.00015958	0.000175564	9.68672e-05	0.000144004	1.30882	0.0393057	0.234875	0.472642	-1.08118
343	Monobutyl phthalate	3.84	level1			221.082	228.4	NEG	C12H14O4	HMDB0013247	131-70-4		Shikimates and Phenylpropanoids	莽草酸及苯丙酸类	Phenolic acids (C6-C1)	Shikimic acids and derivatives	YZBOVSFWWNVKRJ-UHFFFAOYSA-N	3.9322e-05	8.79432e-05	7.71598e-05	6.81417e-05	0.000256141	0.000171758	0.000185843	0.000204581	1.40032	0.0104032	0.150878	3.00228	1.58606
360	Trehalose	3.83	level1			341.109	27.2	NEG	C12H22O11	HMDB0000975	99-20-7	C01083	Carbohydrates	碳水化合物	Saccharides	Disaccharides	HDTRYLNUVZCQOY-LIZSDCNHSA-N	0.00194077	0.00179271	0.00210461	0.00194603	0.000688353	0.000851923	0.000480672	0.00067365	1.48527	0.000816969	0.0738442	0.346166	-1.53046
361	(2R,3S,4S,5R,6R)-2-(hydroxymethyl)-6-[(2S,3R,4S,5S,6R)-3,4,5-trihydroxy-6-(hydroxymethyl)tetrahydropyran-2-yl]oxy-tetrahydropyran-3,4,5-triol	3.83	level1			341.109	27.2	NEG	C12H22O11		585-91-1		Carbohydrates	碳水化合物	Saccharides	Disaccharides	HDTRYLNUVZCQOY-BTLHAWITSA-N	0.00194077	0.00179271	0.00210461	0.00194603	0.000688353	0.000851923	0.000480672	0.00067365	1.48527	0.000816969	0.0738442	0.346166	-1.53046
364	Fructose 1-phosphate	3.83	level1			259.022	29.1	NEG	C6H13O9P	HMDB0060467	15978-08-2	C01094	Carbohydrates	碳水化合物	Saccharides	Monosaccharides	ZKLLSNQJRLJIGT-UYFOZJQFSA-N	0.000388211	0.000223554	0.000302269	0.000304678	0.00015958	0.000175564	9.68672e-05	0.000144004	1.30882	0.0393057	0.234875	0.472642	-1.08118
368	o-Tyrosine	3.83	level1			182.081	26.6	POS	C9H11NO3	HMDB0006050	2370-61-8		Amino acids and Peptides	氨基酸及短肽	Small peptides	Aminoacids	WRFPVMFCRNYQNR-UHFFFAOYSA-N	7.51103e-05	9.31581e-05	9.49853e-05	8.77512e-05	0.00052596	0.000486538	0.000571568	0.000528022	1.55039	6.4746e-05	0.0462829	6.01726	2.58911
369	Tyrosine	3.83	level1			182.081	26.6	POS	C9H11NO3	HMDB0000158	60-18-4	C00082	Amino acids and Peptides	氨基酸及短肽	Small peptides	Aminoacids	OUYCCCASQSFEME-QMMMGPOBSA-N	7.51103e-05	9.31581e-05	9.49853e-05	8.77512e-05	0.00052596	0.000486538	0.000571568	0.000528022	1.55039	6.4746e-05	0.0462829	6.01726	2.58911
370	Pyrrolidine	3.83	level1			72.0806	25.9	POS	C4H9N	HMDB0031641	123-75-1		Alkaloids	生物碱	Lysine alkaloids		RWRDLPDLKQPQOW-UHFFFAOYSA-N	0.000286611	0.000182181	0.000405888	0.00029156	0.000557925	0.000666787	0.000801665	0.000675459	1.36031	0.015941	0.173605	2.31671	1.21207
373	Cytidine	3.83	level1			244.092	25.2	POS	C9H13N3O5	HMDB0000089	65-46-3	C00475	Carbohydrates	碳水化合物	Nucleosides	Pyrimidine nucleos(t)ides	UHDGCWIWMRVCDJ-XVFCMESISA-N	9.60399e-06	6.96673e-06	1.13363e-05	9.30233e-06	6.78922e-05	7.43836e-05	0.000107847	8.33743e-05	1.53543	0.0257822	0.20371	8.96273	3.16394
374	Ribose	3.83	level1			173.042	24.5	POS	C5H10O5	HMDB0000283	24259-59-4	C00121	Carbohydrates	碳水化合物	Saccharides	Monosaccharides	PYMYPHUHKUWMLA-LMVFSUKVSA-N	9.89944e-06	2.58032e-05	1.96504e-05	1.8451e-05	6.66734e-05	3.88784e-05	6.70897e-05	5.75472e-05	1.35367	0.0199136	0.186337	3.11892	1.64105
375	Lyxose	3.83	level1			173.042	24.5	POS	C5H10O5	HMDB0000098	6838-08-0	C00476	Carbohydrates	碳水化合物	Saccharides	Monosaccharides	SRBFZHDQGSBBOR-JAKZDEMDSA-N	9.89944e-06	2.58032e-05	1.96504e-05	1.8451e-05	6.66734e-05	3.88784e-05	6.70897e-05	5.75472e-05	1.35367	0.0199136	0.186337	3.11892	1.64105
390	LPC(16:0)	3.82	level1			496.338	295.6	POS	C24H50NO7P	HMDB0010382	17364-16-8		Fatty acids	脂肪酸	Glycerophospholipids	Glycerophosphocholines	ASWBNKHCZGQVJV-HSZRJFAPSA-N	0.000673014	0.000371652	0.000564446	0.000536371	0.00129088	0.000942874	0.00102484	0.0010862	1.37353	0.0159944	0.173767	2.02509	1.01798
396	PC(16:0/16:0)	3.82	level1			734.574	333.3	POS	C40H80NO8P	HMDB0000564	63-89-8						KILNVBDSWZSGLL-KXQOOQHDSA-N	8.01539e-07	5.28498e-07	8.07505e-07	7.12514e-07	2.40643e-06	2.18345e-06	2.18692e-06	2.25893e-06	1.51731	0.000195318	0.0522539	3.17037	1.66465
400	L-​Leucyl-​L-​alanine	3.82	level1			201.124	35.8	NEG	C9H18N2O3	HMDB0028922	7298-84-2		Amino acids and Peptides	氨基酸及短肽	Small peptides	Dipeptides	HSQGMTRYSIHDAC-BQBZGAKWSA-N	0.00020815	0.000306978	0.000138576	0.000217901	3.18165e-05	4.51403e-05	6.50253e-05	4.73274e-05	1.44839	0.0266546	0.206091	0.217196	-2.20293
408	PC(18:0/14:0)	3.81	level1			734.574	333.3	POS	C40H80NO8P	HMDB0008031	20664-02-2		Fatty acids	脂肪酸	Glycerophospholipids	Glycerophosphocholines	MZWGYEJOZNRLQE-KXQOOQHDSA-N	8.01539e-07	5.28498e-07	8.07505e-07	7.12514e-07	2.40643e-06	2.18345e-06	2.18692e-06	2.25893e-06	1.51731	0.000195318	0.0522539	3.17037	1.66465
410	(10Z,13Z)-15,16-dihydroxyoctadeca-10,13-dienoic acid	3.81	level1			295.226	262	POS	C18H32O4				Fatty acids	脂肪酸	Octadecanoids	Other Octadecanoids	IQWYIIPDFISFMV-HWXFIQLYSA-N	0.000203383	0.000676761	0.000298983	0.000393042	0.00212836	0.00206995	0.00436515	0.00285449	1.43258	0.032903	0.221632	7.26255	2.86048
413	Heptadecanoic acid	3.81	level1			269.248	329	NEG	C17H34O2	HMDB0002259	506-12-7		Fatty acids	脂肪酸	Fatty Acids and Conjugates	Branched fatty acids	KEMQGTRYUADPNZ-UHFFFAOYSA-N	0.000199925	0.000261794	0.000188977	0.000216899	0.000430109	0.000446255	0.000455727	0.000444031	1.49267	0.000681056	0.0700929	2.04718	1.03364
418	Indoleacrylic acid	3.81	level1			186.056	196.1	NEG	C11H9NO2	HMDB0000734	1204-06-4		Alkaloids	生物碱	Tryptophan alkaloids	Simple indole alkaloids	SXOUIMVOMIGLHO-AATRIKPKSA-N	0.000109309	9.10001e-05	0.000111121	0.00010381	8.45757e-05	8.13131e-05	6.62435e-05	7.73774e-05	1.28813	0.0365748	0.229754	0.745374	-0.423964
419	Cysteine-glutathione disulfide	3.81	level1			425.08	29.9	NEG	C13H22N4O8S2	HMDB0250707	13081-14-6		Amino acids and Peptides	氨基酸及短肽	Small peptides	Dipeptides	GNTARDAHCXNJEX-UHFFFAOYSA-N	4.57091e-05	2.96072e-05	5.62262e-05	4.38475e-05	7.90077e-06	1.70966e-05	8.26107e-06	1.10862e-05	1.42128	0.0168851	0.175948	0.252834	-1.98374
421	Isomaltose	3.8	level1			341.109	27.2	NEG	C12H22O11	HMDB0002923	499-40-1	C00252	Carbohydrates	碳水化合物	Saccharides	Disaccharides	DLRVVLDZNNYCBX-RTPHMHGBSA-N	0.00194077	0.00179271	0.00210461	0.00194603	0.000688353	0.000851923	0.000480672	0.00067365	1.48527	0.000816969	0.0738442	0.346166	-1.53046
425	Cystine-glutathione	3.8	level1			425.08	29.9	NEG	C13H22N4O8S2	HMDB0000656	13081-14-6	C05526	Amino acids and Peptides	氨基酸及短肽	Small peptides	Dipeptides	BNRXZEPOHPEEAS-UHFFFAOYSA-N	4.57091e-05	2.96072e-05	5.62262e-05	4.38475e-05	7.90077e-06	1.70966e-05	8.26107e-06	1.10862e-05	1.42128	0.0168851	0.175948	0.252834	-1.98374
427	2-Methyl-11-oxo-11H-pyrido[2,1-b]quinazoline-6-carboxylic acid	3.8	level1			237.069	175.9	POS	C14H10N2O3		4393-98-0		Alkaloids	生物碱	Anthranilic acid alkaloids	Quinazoline alkaloids	PULTVJUNVUPMSG-UHFFFAOYSA-N	5.37494e-05	3.54207e-05	9.10766e-05	6.00822e-05	0.000156708	0.000116862	0.000133434	0.000135668	1.32114	0.0195838	0.185129	2.25804	1.17507
428	S-Methylmethionine	3.8	level1			164.073	27.2	POS	C6H14NO2S	HMDB0038670	13065-25-3	C05319	Amino acids and Peptides	氨基酸及短肽	Small peptides	Aminoacids	YDBYJHTYSHBBAU-UHFFFAOYSA-O	0.00309182	0.00205091	0.00256795	0.00257022	0.000484612	0.000863324	0.000470627	0.000606188	1.4879	0.00386184	0.112629	0.23585	-2.08406
431	2,5-Di-tert-butylhydroquinone	3.8	level1			221.154	279.3	NEG	C14H22O2	HMDB0245492	88-58-4		Shikimates and Phenylpropanoids	莽草酸及苯丙酸类			JZODKRWQWUWGCD-UHFFFAOYSA-N	2.4906e-05	3.44525e-05	3.52197e-05	3.15261e-05	5.21536e-05	4.68182e-05	4.40757e-05	4.76825e-05	1.34905	0.0166515	0.175587	1.51248	0.596913
434	Blinin	3.8	level1			391.216	226.4	NEG	C22H32O6		125675-09-4		Terpenoids	萜类	Diterpenoids	Colensane and Clerodane diterpenoids	XXSSNTKMBVTREV-DDHROXKOSA-N	5.60232e-05	0.000115001	5.68606e-05	7.59616e-05	0.00023578	0.000138148	0.000212682	0.000195537	1.33744	0.0276936	0.208771	2.57415	1.3641
435	(1R,6R,13R)-13-hydroxy-6-(1-hydroxy-1-methyl-ethyl)-16,17-dimethoxy-2,7,20-trioxapentacyclo[11.8.0.03,11.04,8.014,19]henicosa-3(11),4(8),9,14,16,18-hexaen-12-one	3.8	level1			427.142	226.2	NEG	C23H24O8		85042-77-9		Shikimates and Phenylpropanoids	莽草酸及苯丙酸类	Isoflavonoids	Rotenoids	NSFCLBVWJYYZMR-DNVFCKCGSA-N	1.43636e-06	2.99414e-06	1.16184e-06	1.86411e-06	1.7131e-05	7.33332e-06	1.57974e-05	1.34206e-05	1.44556	0.0207731	0.189313	7.19945	2.84789
442	Indole-3-methyl acetate	3.79	level1			188.071	210.6	NEG	C11H11NO2	HMDB0029738	1912-33-0	C20635	Alkaloids	生物碱	Tryptophan alkaloids	Simple indole alkaloids	KTHADMDGDNYQRX-UHFFFAOYSA-N	9.47494e-06	8.38946e-06	8.27281e-06	8.7124e-06	6.88845e-06	6.60686e-06	4.86867e-06	6.12133e-06	1.31149	0.0247048	0.200423	0.702599	-0.509226
444	Phe-Pro	3.79	level1			263.138	136.5	POS	C14H18N2O3	HMDB0011177	7669-65-0		Amino acids and Peptides	氨基酸及短肽	Small peptides		WEQJQNWXCSUVMA-RYUDHWBXSA-N	1.03366e-05	1.73909e-05	1.41512e-05	1.39595e-05	3.4308e-05	3.11031e-05	4.88942e-05	3.81017e-05	1.44331	0.0144659	0.167949	2.72944	1.44861
445	3',4'-Dihydroxyacetophenone	3.79	level1			151.04	141.6	NEG	C8H8O3	HMDB0029661	1197-09-7	C10675	Shikimates and Phenylpropanoids	莽草酸及苯丙酸类			UCQUAMAQHHEXGD-UHFFFAOYSA-N	1.44722e-05	1.7764e-05	1.5744e-05	1.59934e-05	1.75227e-06	1.33692e-06	2.2115e-06	1.7669e-06	1.54017	0.000136887	0.0488946	0.110477	-3.17818
452	3-Amino-3-(4-hydroxyphenyl)propanoic acid	3.78	level1			182.081	26.6	POS	C9H11NO3	HMDB0003831	6049-54-3	C04368	Amino acids and Peptides	氨基酸及短肽	Small peptides	Aminoacids	JYPHNHPXFNEZBR-UHFFFAOYSA-N	7.51103e-05	9.31581e-05	9.49853e-05	8.77512e-05	0.00052596	0.000486538	0.000571568	0.000528022	1.55039	6.4746e-05	0.0462829	6.01726	2.58911
453	3-Indoleacrylic acid	3.78	level1			186.056	196.1	NEG	C11H9NO2	HMDB0000734	1204-06-4	C21283	Alkaloids	生物碱	Tryptophan alkaloids	Simple indole alkaloids	PLVPPLCLBIEYEA-AATRIKPKSA-N	0.000109309	9.10001e-05	0.000111121	0.00010381	8.45757e-05	8.13131e-05	6.62435e-05	7.73774e-05	1.28813	0.0365748	0.229754	0.745374	-0.423964
456	Maltose	3.78	level1			365.104	24.6	POS	C12H22O11	HMDB0000163	69-79-4	C00208	Carbohydrates	碳水化合物	Saccharides	Disaccharides	GUBGYTABKSRVRQ-DKBJLJRDSA-N	0.00300836	0.00257631	0.00310252	0.00289573	0.0019879	0.00249797	0.00216696	0.00221761	1.29897	0.0370387	0.230619	0.765821	-0.384921
457	Melibiose	3.78	level1			365.104	24.6	POS	C12H22O11	HMDB0000048	60033-03-6	C05402	Carbohydrates	碳水化合物	Saccharides	Disaccharides	DLRVVLDZNNYCBX-CQHUIXDMSA-N	0.00300836	0.00257631	0.00310252	0.00289573	0.0019879	0.00249797	0.00216696	0.00221761	1.29897	0.0370387	0.230619	0.765821	-0.384921
459	Fostamatinib	3.78	level1			561.125	227.2	NEG	C23H26FN6O9P	HMDB0252469	901119-35-5	D09347	Alkaloids	生物碱			GKDRMWXFWHEQQT-UHFFFAOYSA-N	5.34323e-05	7.53583e-05	3.53651e-05	5.47186e-05	1.86694e-05	2.44052e-05	1.05163e-05	1.78636e-05	1.35732	0.0395579	0.235198	0.326464	-1.615
466	trans-11-Eicosenoic acid	3.77	level1			309.279	338.3	NEG	C20H38O2	HMDB0034296	2462-94-4		Fatty acids	脂肪酸	Fatty Acids and Conjugates	Unsaturated fatty acids	BITHHVVYSMSWAG-MDZDMXLPSA-N	6.49965e-06	1.34299e-05	2.35661e-06	7.4287e-06	2.3766e-05	1.91332e-05	2.09244e-05	2.12745e-05	1.20339	0.0167413	0.175766	2.86383	1.51794
483	2-Hydroxyoctanoic acid	3.76	level1			159.102	213.3	NEG	C8H16O3	HMDB0000711	617-73-2		Fatty acids	脂肪酸	Fatty Acids and Conjugates	Hydroxy fatty acids	JKRDADVRIYVCCY-UHFFFAOYSA-N	4.12385e-06	7.53787e-06	6.55234e-06	6.07135e-06	1.70745e-05	1.10764e-05	1.75481e-05	1.5233e-05	1.39216	0.016753	0.175774	2.509	1.32711
486	Monomethyl fumarate	3.76	level1			129.019	25.8	NEG	C5H6O4		2756-87-8	D11492	Fatty acids	脂肪酸	Fatty esters	Wax monoesters	NKHAVTQWNUWKEO-NSCUHMNNSA-N	0.000139437	0.000162618	0.000216813	0.000172956	0.000337493	0.000256092	0.000252622	0.000282069	1.31781	0.0386839	0.233824	1.63087	0.705641
487	Mono(2-ethylhexyl) phthalate	3.76	level1			279.158	276.5	POS	C16H22O4	HMDB0013248	4376-20-9	C03343	Shikimates and Phenylpropanoids	莽草酸及苯丙酸类	Phenolic acids (C6-C1)	Shikimic acids and derivatives	DJDSLBVSSOQSLW-UHFFFAOYSA-N	0.00190726	0.00380421	0.00307696	0.00292948	0.00886425	0.0076981	0.00859898	0.00838711	1.45271	0.00113791	0.0801717	2.86301	1.51753
499	Pseudolaric Acid A	3.75	level1			369.174	253.7	NEG	C22H28O6		82508-32-5		Terpenoids	萜类	Diterpenoids		GOHMRMDXUXWCDQ-UHFFFAOYSA-N	1.01557e-05	2.29521e-05	9.35841e-06	1.41554e-05	2.6115e-05	3.79689e-05	4.89209e-05	3.76683e-05	1.29116	0.041229	0.237455	2.66105	1.412
500	NG 52	3.75	level1			327.117	244.2	NEG	C16H19ClN6O	HMDB0255574	212779-48-1		Alkaloids	生物碱	Pseudoalkaloids		XZEFMZCNXDQXOZ-UHFFFAOYSA-N	1.49566e-05	4.47434e-05	3.81946e-05	3.26315e-05	0.000114005	0.000176844	0.000103429	0.000131426	1.37837	0.0159842	0.173767	4.02758	2.00991
501	[(2R,3R,4R,8S,10R,11R)-2,3,11-trihydroxy-4,6,6,10-tetramethyl-8-tricyclo[5.3.1.04,11]undecanyl] acetate	3.75	level1			311.186	243.6	NEG	C17H28O5				Terpenoids	萜类	Sesquiterpenoids	Presilphiperfolane and Probotryane sesquiterpenoids	XEUSNZUHUUORTO-PEBXEEOJSA-N	1.4166e-05	3.14507e-05	2.66431e-05	2.40866e-05	8.5265e-05	7.78775e-05	0.000155024	0.000106055	1.42853	0.0309555	0.217315	4.40309	2.13852
502	3-(2,4-Dihydroxypentyl)-6,8-dihydroxyisochromen-1-one	3.75	level1			279.091	205.3	NEG	C14H16O6				Shikimates and Phenylpropanoids	莽草酸及苯丙酸类	Coumarins	Isocoumarins	CQXZVXNVRFIVCN-UHFFFAOYSA-N	0.00113996	0.00184867	0.00184776	0.00161213	0.000740799	0.00106589	0.000525245	0.00077731	1.28378	0.0422343	0.237455	0.482164	-1.0524
505	Leu-Ile	3.75	level1			243.171	64.2	NEG	C12H24N2O3	HMDB0028932	36077-41-5		Amino acids and Peptides	氨基酸及短肽	Small peptides	Dipeptides	AZLASBBHHSLQDB-GUBZILKMSA-N	6.80015e-06	1.07128e-05	8.79259e-06	8.76851e-06	1.45474e-05	1.22765e-05	1.90831e-05	1.53023e-05	1.30099	0.0466932	0.237455	1.74515	0.803348
506	LPC(13:0)	3.74	level1			452.278	297.2	NEG	C21H44NO7P		20559-17-5		Fatty acids	脂肪酸	Glycerophospholipids	Glycerophosphocholines	WNRCJJWBAXNAPE-HXUWFJFHSA-N	0.000170968	0.000193634	0.000236778	0.00020046	0.000466588	0.000366412	0.000468714	0.000433905	1.48875	0.00387296	0.112629	2.16455	1.11406
515	4-Hydroxyphenylacetic acid	3.74	level1			151.04	141.6	NEG	C8H8O3	HMDB0000020	156-38-7	C00642	Shikimates and Phenylpropanoids	莽草酸及苯丙酸类	Phenolic acids (C6-C1)	Simple phenolic acids	XQXPVVBIMDBYFF-UHFFFAOYSA-N	1.44722e-05	1.7764e-05	1.5744e-05	1.59934e-05	1.75227e-06	1.33692e-06	2.2115e-06	1.7669e-06	1.54017	0.000136887	0.0488946	0.110477	-3.17818
518	5-[(1E,3E)-hepta-1,3-dienyl]-1,2,3-trihydroxy-cyclopentanecarboxylic acid	3.74	level1			255.124	217.3	NEG	C13H20O5				Polyketides	聚酮			OZVYSAYWLKQNMK-YTXTXJHMSA-N	6.56955e-06	3.00695e-05	1.43435e-05	1.69942e-05	8.02299e-05	5.7127e-05	8.83017e-05	7.52195e-05	1.35852	0.00743527	0.137109	4.42619	2.14606
522	2-oxindole-3-acetate	3.74	level1			190.051	164.4	NEG	C10H9NO3	HMDB0035514	2971-31-5	C22202	Alkaloids	生物碱	Tryptophan alkaloids	Simple oxindole alkaloids	ILGMGHZPXRDCCS-UHFFFAOYSA-N	2.58472e-05	5.37949e-05	3.08666e-05	3.68362e-05	1.52947e-05	8.37268e-06	7.53896e-06	1.04021e-05	1.40056	0.0417752	0.237455	0.282389	-1.82425
523	Entadamide-A-β-D-glucopyranoside	3.74	level1			322.093	48.3	NEG	C12H21NO7S		138916-58-2						FISKBHZVUFLWDZ-IYYAVIMFSA-N	4.15413e-05	3.65694e-05	3.51129e-05	3.77412e-05	3.08303e-05	2.75995e-05	3.04928e-05	2.96409e-05	1.38332	0.021155	0.190469	0.785371	-0.348554
529	methyl 5-hydroxy-1H-indole-3-carboxylate	3.73	level1			190.051	164.4	NEG	C10H9NO3		112332-96-4		Alkaloids	生物碱	Tryptophan alkaloids	Simple indole alkaloids	LRAADKIIEUFKEG-UHFFFAOYSA-N	2.58472e-05	5.37949e-05	3.08666e-05	3.68362e-05	1.52947e-05	8.37268e-06	7.53896e-06	1.04021e-05	1.40056	0.0417752	0.237455	0.282389	-1.82425
534	N6,N6,N6-Trimethyllysine	3.73	level1			189.159	29.2	POS	C9H20N2O2	HMDB0001325	19253-88-4	C03793	Amino acids and Peptides	氨基酸及短肽	Small peptides	Aminoacids	MXNRLFUSFKVQSK-QMMMGPOBSA-N	0.000636954	0.000725913	0.000743161	0.000702009	0.000372662	0.000311005	0.00033541	0.000339692	1.52557	0.000640192	0.0687922	0.483886	-1.04726
536	5-[5-hydroxy-3-(hydroxymethyl)pentyl]-8a-(hydroxymethyl)-5,6-dimethyl-3,4,4a,6,7,8-hexahydronaphthalene-1-carboxylic acid	3.73	level1			353.233	264.2	NEG	C20H34O5				Terpenoids	萜类	Diterpenoids	Colensane and Clerodane diterpenoids	VOCJFEUCJDTXSA-UHFFFAOYSA-N	1.10488e-05	2.4175e-05	1.58265e-05	1.70168e-05	7.89277e-05	6.06559e-05	8.25958e-05	7.40598e-05	1.47892	0.00185449	0.0924199	4.35217	2.12173
546	Nonadecanoic acid	3.72	level1			297.279	347.3	NEG	C19H38O2	HMDB0000772	646-30-0	C16535	Fatty acids	脂肪酸	Fatty Acids and Conjugates	Unsaturated fatty acids	ISYWECDDZWTKFF-UHFFFAOYSA-N	2.98886e-05	8.74907e-05	2.93863e-05	4.89219e-05	0.000176089	0.000123203	0.000156785	0.000152026	1.32939	0.0140045	0.16605	3.10752	1.63576
547	Pristanic acid	3.72	level1			297.279	347.3	NEG	C19H38O2	HMDB0000795	1189-37-3		Fatty acids	脂肪酸	Fatty Acids and Conjugates	Branched fatty acids	PAHGJZDQXIOYTH-UHFFFAOYSA-N	2.98886e-05	8.74907e-05	2.93863e-05	4.89219e-05	0.000176089	0.000123203	0.000156785	0.000152026	1.32939	0.0140045	0.16605	3.10752	1.63576
551	naphthalene-1,3-diol	3.72	level1			159.045	175.6	NEG	C10H8O2		132-86-5		Shikimates and Phenylpropanoids	莽草酸及苯丙酸类	Phenanthrenoids	Phenanthrenes	XOOMNEFVDUTJPP-UHFFFAOYSA-N	4.07564e-05	5.10558e-05	2.44364e-05	3.87495e-05	1.22465e-05	1.25891e-05	8.13693e-06	1.09908e-05	1.44541	0.0243959	0.199662	0.283638	-1.81788
558	Aspartylphenylalanine	3.72	level1			279.098	40.3	NEG	C13H16N2O5	HMDB0000706	13433-09-5		Amino acids and Peptides	氨基酸及短肽	Small peptides	Dipeptides	YZQCXOFQZKCETR-UWVGGRQHSA-N	1.22489e-05	1.05037e-05	1.67832e-05	1.31786e-05	3.1037e-05	2.37255e-05	3.41833e-05	2.96486e-05	1.44207	0.0104109	0.150916	2.24975	1.16976
564	5'-Methylthioadenosine	3.71	level1			298.096	149.7	POS	C11H15N5O3S	HMDB0001173	2457-80-9	C00170	Carbohydrates	碳水化合物	Nucleosides	Purine nucleos(t)ides	WUUGFSXJNOTRMR-IOSLPCCCSA-N	0.00238268	0.00124384	0.00171363	0.00178005	0.000447468	0.000667411	0.000441669	0.000518849	1.4552	0.0204052	0.187877	0.29148	-1.77853
565	5-Hydroxytryptophol (5HTOL)	3.71	level1			160.075	146.7	POS	C10H11NO2	HMDB0001855	154-02-9		Alkaloids	生物碱	Tryptophan alkaloids	Simple indole alkaloids	KQROHCSYOGBQGJ-UHFFFAOYSA-N	0.00229489	0.00280118	0.0022709	0.00245566	0.00420937	0.00464398	0.0037738	0.00420905	1.46708	0.00453606	0.117177	1.71402	0.777387
566	4-O-p-Coumaroylquinic acid	3.71	level1			339.107	134.2	POS	C16H18O8		53539-37-0	C10441	Shikimates and Phenylpropanoids	莽草酸及苯丙酸类	Phenylpropanoids (C6-C3)	Cinnamic acids and derivatives	XWRHBGVVCOSNKO-OTCYKTEZSA-N	6.04362e-06	3.82578e-06	4.86305e-06	4.91082e-06	1.18311e-06	1.71271e-06	5.97745e-07	1.16452e-06	1.42614	0.00640712	0.13056	0.237134	-2.07623
568	10-[(2R,3R,4S,5S,6R)-3,4,5-trihydroxy-6-(hydroxymethyl)tetrahydropyran-2-yl]oxydeca-4,6-diynoic acid	3.71	level1			323.11	184.8	NEG	C16H22O8								BAGGOTACEXSWCA-YMILTQATSA-N	9.2123e-06	1.11978e-05	1.24484e-05	1.09528e-05	4.69094e-06	7.51648e-06	4.57086e-06	5.59276e-06	1.37882	0.016406	0.174818	0.510622	-0.969672
571	Tryptophan	3.71	level1			203.082	45	NEG	C11H12N2O2	HMDB0030396	73-22-3	C00078	Amino acids and Peptides	氨基酸及短肽	Small peptides	Aminoacids	QIVBCDIJIAJPQS-VIFPVBQESA-N	0.000377253	0.000260281	0.000436879	0.000358137	0.00135496	0.00155918	0.00143436	0.0014495	1.52334	0.000158246	0.0496389	4.04733	2.01697
575	3,5-Dihydroxyacetophenone	3.7	level1			151.04	141.6	NEG	C8H8O3	HMDB0029662	51863-60-6		Shikimates and Phenylpropanoids	莽草酸及苯丙酸类			WQXWIKCZNIGMAP-UHFFFAOYSA-N	1.44722e-05	1.7764e-05	1.5744e-05	1.59934e-05	1.75227e-06	1.33692e-06	2.2115e-06	1.7669e-06	1.54017	0.000136887	0.0488946	0.110477	-3.17818
579	6a-acetyl-1-(carboxymethyl)-5,5-dimethyl-1,3a,4,6-tetrahydropentalene-2-carboxylic acid	3.7	level1			281.137	252.7	POS	C15H20O5				Terpenoids	萜类	Sesquiterpenoids	Tremulane sesquiterpenoids	WOTXAPMXQUOEIX-UHFFFAOYSA-N	1.03319e-05	1.06502e-05	1.28731e-05	1.12851e-05	1.37066e-05	1.51236e-05	1.50636e-05	1.46313e-05	1.35683	0.0222929	0.194077	1.29652	0.374644
581	10-methoxy-2,2-dimethyl-pyrano[3,2-g]chromen-8-one	3.7	level1			259.096	201.7	POS	C15H14O4		483-92-1	C09273	Shikimates and Phenylpropanoids	莽草酸及苯丙酸类	Coumarins	Simple coumarins	XYPWCJWXFYYGPA-UHFFFAOYSA-N	8.40419e-05	4.78185e-05	4.49914e-05	5.89506e-05	2.68637e-06	6.1462e-06	1.42356e-05	7.68938e-06	1.40829	0.0170424	0.176279	0.130438	-2.93857
584	Lappaconine	3.7	level1			424.268	179.3	POS	C23H37NO6		23943-93-3		Alkaloids	生物碱	Pseudoalkaloids	Terpenoid alkaloids	ZBSZKFYYJKXUHF-ORKWHGSKSA-N	5.44078e-09	5.69788e-09	6.14832e-09	5.76233e-09	6.85906e-09	6.19632e-09	6.61583e-09	6.55707e-09	1.27832	0.048516	0.237455	1.13792	0.1864
585	(Z)-3-(4-oxo-5-propan-2-ylidene-2-propylfuran-3-yl)prop-2-enoic acid	3.7	level1			219.101	177.3	POS	C13H16O4				Polyketides	聚酮			NPEVDKHQEYSYTP-SREVYHEPSA-N	6.25761e-05	8.8517e-05	0.000115571	8.88882e-05	2.15298e-05	2.27432e-05	1.29353e-05	1.90694e-05	1.47905	0.0110465	0.154143	0.214533	-2.22073
586	Oxysophocarpine	3.7	level1			263.175	173.9	POS	C15H22N2O2		26904-64-3		Alkaloids	生物碱	Lysine alkaloids	Quinolizidine alkaloids	QMGGMESMCJCABO-LHDUFFHYSA-N	0.000203335	9.91667e-05	0.000251948	0.000184817	6.37728e-05	5.41744e-05	1.80162e-05	4.53211e-05	1.29352	0.0416656	0.237455	0.245222	-2.02784
595	Iguratimod	3.7	level1			355.043	207.3	NEG	C17H14N2O6S	HMDB0253390	123663-49-0	D01146	Polyketides	聚酮	Chromanes	Chromones	ANMATWQYLIFGOK-UHFFFAOYSA-N	1.38185e-05	2.60747e-05	2.0471e-05	2.01214e-05	2.93282e-06	3.00021e-06	1.2494e-06	2.39414e-06	1.48868	0.00781573	0.138117	0.118985	-3.07115
601	5-Hydroxyindole-3-acetic acid	3.69	level1			190.051	164.4	NEG	C10H9NO3	HMDB0000763	54-16-0	C05635	Alkaloids	生物碱	Tryptophan alkaloids	Simple indole alkaloids	DUUGKQCEGZLZNO-UHFFFAOYSA-N	2.58472e-05	5.37949e-05	3.08666e-05	3.68362e-05	1.52947e-05	8.37268e-06	7.53896e-06	1.04021e-05	1.40056	0.0417752	0.237455	0.282389	-1.82425
602	Xanthoxyletin	3.69	level1			259.096	201.7	POS	C15H14O4		84-99-1		Shikimates and Phenylpropanoids	莽草酸及苯丙酸类	Coumarins	Simple coumarins	JSJIIHRNDMLJGK-UHFFFAOYSA-N	8.40419e-05	4.78185e-05	4.49914e-05	5.89506e-05	2.68637e-06	6.1462e-06	1.42356e-05	7.68938e-06	1.40829	0.0170424	0.176279	0.130438	-2.93857
605	Andrographolide	3.69	level1			351.213	227	POS	C20H30O5		5508-58-7	C20214	Terpenoids	萜类	Diterpenoids	Labdane diterpenoids	BOJKULTULYSRAS-OTESTREVSA-N	5.08724e-05	0.000115098	5.88956e-05	7.49554e-05	0.000307045	0.000217159	0.000294604	0.000272936	1.438	0.00462891	0.117566	3.64131	1.86446
610	Adenosine	3.69	level1			268.103	33.1	POS	C10H13N5O4	HMDB0000050	58-61-7	C00212	Carbohydrates	碳水化合物	Nucleosides	Purine nucleos(t)ides	OIRDTQYFTABQOQ-UHFFFAOYSA-N	0.00169836	0.000989381	0.00143392	0.00137389	0.000236324	0.000155463	8.1584e-05	0.00015779	1.4851	0.00454563	0.117177	0.114849	-3.12218
611	12,15-Dihydroxy-13-methylhexadecanoic acid	3.69	level1			283.227	306.5	NEG	C17H34O4				Fatty acids	脂肪酸	Fatty Acids and Conjugates		VUHKKYAXFCILCE-UHFFFAOYSA-N	6.26468e-06	4.97856e-05	2.5878e-05	2.73095e-05	9.92719e-05	8.82064e-05	0.00017074	0.000119406	1.24949	0.0328431	0.221602	4.37233	2.1284
614	Moclobemide	3.69	level1			267.087	150.6	NEG	C13H17ClN2O2	HMDB0015302	71320-77-9	D02561	Alkaloids	生物碱			YHXISWVBGDMDLQ-UHFFFAOYSA-N	8.36127e-05	8.19367e-05	0.000108906	9.14852e-05	6.55018e-05	5.24127e-05	2.53458e-05	4.77535e-05	1.19182	0.0408924	0.237455	0.52198	-0.937933
615	Prolylhydroxyproline	3.69	level1			227.101	20.5	NEG	C10H16N2O4	HMDB0006695	18684-24-7		Alkaloids	生物碱	Lysine alkaloids	Piperidine alkaloids	ONPXCLZMBSJLSP-CSMHCCOUSA-N	9.06338e-06	6.75615e-06	6.4668e-06	7.42878e-06	1.60494e-05	2.27635e-05	2.49538e-05	2.12556e-05	1.47805	0.0078464	0.138218	2.86125	1.51664
616	6-[[3-(hydroxymethyl)-5-oxo-2H-furan-4-yl]methyl]-5,6-dimethylcyclohexene-1-carboxylic acid	3.68	level1			281.137	252.7	POS	C15H20O5				Terpenoids	萜类	Sesquiterpenoids		NJQQRUULYCFGOY-UHFFFAOYSA-N	1.03319e-05	1.06502e-05	1.28731e-05	1.12851e-05	1.37066e-05	1.51236e-05	1.50636e-05	1.46313e-05	1.35683	0.0222929	0.194077	1.29652	0.374644
617	(1S,2S,12S)-3,11-dihydroxy-1,2,5-trimethyl-spiro[8-oxatricyclo[7.2.1.02,7]dodec-5-ene-12,2'-oxirane]-4-one	3.68	level1			281.137	252.7	POS	C15H20O5				Terpenoids	萜类	Sesquiterpenoids	Trichothecane sesquiterpenoids	RSFFUWNYMOEBFP-VYUPKBRNSA-N	1.03319e-05	1.06502e-05	1.28731e-05	1.12851e-05	1.37066e-05	1.51236e-05	1.50636e-05	1.46313e-05	1.35683	0.0222929	0.194077	1.29652	0.374644
619	(3E,4R)-3-[2-[(1R,4aS,5R,6R,8aS)-6-hydroxy-5-(hydroxymethyl)-5,8a-dimethyl-2-methylene-decalin-1-yl]ethylidene]-4-hydroxy-tetrahydrofuran-2-one	3.68	level1			351.213	227	POS	C20H30O5		142037-79-4		Terpenoids	萜类	Diterpenoids	Labdane diterpenoids	BOJKULTULYSRAS-NPWGMBKGSA-N	5.08724e-05	0.000115098	5.88956e-05	7.49554e-05	0.000307045	0.000217159	0.000294604	0.000272936	1.438	0.00462891	0.117566	3.64131	1.86446
623	Lauramine oxide	3.68	level1			230.247	242.7	POS	C14H31NO		1643-20-5		Fatty acids	脂肪酸	Fatty acyls	Hydrocarbons	SYELZBGXAIXKHU-UHFFFAOYSA-N	0.000173591	0.000148798	0.000182416	0.000168268	0.000119227	0.000108348	0.000128684	0.000118753	1.4053	0.0131659	0.162838	0.705736	-0.502799
627	gamma-Glutamylphenylalanine	3.68	level1			295.128	48.7	POS	C14H18N2O5	HMDB0000594	7432-24-8		Amino acids and Peptides	氨基酸及短肽	Small peptides	Dipeptides	XHHOHZPNYFQJKL-UHFFFAOYSA-N	5.05925e-05	6.60149e-05	5.69041e-05	5.78372e-05	9.07423e-05	8.94752e-05	8.69975e-05	8.90716e-05	1.46182	0.00247559	0.100042	1.54004	0.62297
630	3-(1-hydroxy-3-methyl-butyl)-6-[2-hydroxy-4-methyl-6-[[(2R,3R,4S,5R)-3,4,5-trihydroxytetrahydropyran-2-yl]oxymethyl]phenoxy]-2-methoxy-benzoic acid	3.68	level1			521.203	175	NEG	C26H34O11				Polyketides	聚酮	Diphenyl ethers (DPEs)	Fungal DPEs	GSOMKADVURIZLA-BQUQVJLCSA-N	0.000124072	0.000103679	0.000162866	0.000130206	3.00026e-05	2.42236e-05	1.29941e-05	2.24068e-05	1.48341	0.00395922	0.112629	0.172087	-2.53879
636	Arctiin	3.67	level1			517.202	183.2	POS	C27H34O11	HMDB0301809	20362-31-6	C16915	Shikimates and Phenylpropanoids	莽草酸及苯丙酸类	Lignans	Dibenzylbutyrolactone lignans	XOJVHLIYNSOZOO-SWOBOCGESA-N	0.000578585	0.000559304	0.000388266	0.000508718	0.000129985	0.00030004	0.000129055	0.00018636	1.36208	0.0177835	0.178644	0.366333	-1.44877
643	(2R)-8-ethyl-7-hydroxy-5-methoxy-2-methyl-chroman-4-one	3.66	level1			219.101	190.4	POS	C13H16O4		159686-25-6		Polyketides	聚酮	Chromanes	Chromones	BPIMOIWHAHUBPJ-SSDOTTSWSA-N	4.97178e-05	5.18715e-05	7.30704e-05	5.82199e-05	3.32612e-05	2.33797e-05	1.97588e-05	2.54665e-05	1.40364	0.0180653	0.179776	0.43742	-1.19291
645	7-ethyl-8-hydroxy-4,7-dimethyl-6-oxo-8H-isochromene-3-carboxylic acid	3.66	level1			265.106	136.3	POS	C14H16O5				Polyketides	聚酮	Chromanes	Azaphilones	CNXACDYPVKUDEK-UHFFFAOYSA-N	4.28611e-05	6.34532e-05	3.28815e-05	4.63986e-05	6.88829e-06	3.89972e-06	8.2767e-06	6.3549e-06	1.49363	0.044485	0.237455	0.136963	-2.86814
649	Methyl caffeate	3.66	level1			193.05	181.6	NEG	C10H10O4		3843-74-1	C10477	Shikimates and Phenylpropanoids	莽草酸及苯丙酸类	Phenylpropanoids (C6-C3)	Cinnamic acids and derivatives	OCNYGKNIVPVPPX-HWKANZROSA-N	5.12464e-05	5.26298e-05	4.52386e-05	4.9705e-05	3.5904e-05	2.79917e-05	3.07967e-05	3.15641e-05	1.45793	0.00500673	0.121064	0.63503	-0.655103
654	Sph(d18:0)	3.65	level1			302.304	306	POS	C18H39NO2	HMDB0000269	764-22-7	C00836	Fatty acids	脂肪酸	Sphingolipids	Sphingoid bases	OTKJDMGTUTTYMP-ZWKOTPCHSA-N	3.23686e-05	2.86901e-05	3.92972e-05	3.3452e-05	1.39572e-05	1.2102e-05	1.68474e-05	1.43022e-05	1.47786	0.00490129	0.120291	0.427544	-1.22585
655	Camphor	3.65	level1			153.127	199.1	POS	C10H16O	HMDB0059838	76-22-2	C00808	Terpenoids	萜类	Monoterpenoids	Camphane monoterpenoids	DSSYKIVIOFKYAU-MHPPCMCBSA-N	3.21416e-06	2.36003e-06	3.60685e-06	3.06035e-06	5.09748e-06	4.71486e-06	7.20614e-06	5.67283e-06	1.35347	0.0381629	0.233101	1.85366	0.890374
658	3-(2,3-dihydroxypropyl)-6,8-dihydroxy-isochromen-1-one	3.65	level1			251.059	179.6	NEG	C12H12O6				Shikimates and Phenylpropanoids	莽草酸及苯丙酸类	Coumarins	Isocoumarins	VILYFHCPBMAWFN-UHFFFAOYSA-N	0.000219163	0.000230737	0.000323713	0.000257871	0.000115256	0.00016952	7.82839e-05	0.00012102	1.31085	0.0320254	0.220071	0.469305	-1.0914
660	Neantine	3.64	level1			205.085	276.5	POS	C12H14O4	HMDB0094660	84-66-2	C14175	Shikimates and Phenylpropanoids	莽草酸及苯丙酸类	Phenolic acids (C6-C1)	Shikimic acids and derivatives	FLKPEMZONWLCSK-UHFFFAOYSA-N	0.000444865	0.00088979	0.000710616	0.000681757	0.00209001	0.00182305	0.00205095	0.001988	1.4557	0.00105207	0.0791595	2.916	1.54399
673	Eplerenone	3.62	level1			415.21	252.7	POS	C24H30O6		107724-20-9		Terpenoids	萜类	Steroids	Pregnane steroids	JUKPWJGBANNWMW-MKKQDWMASA-N	0.00041896	0.00040207	0.000507004	0.000442678	0.000535154	0.000606657	0.000528321	0.000556711	1.26894	0.0499541	0.240607	1.2576	0.33067
675	6a,7,8-trihydroxy-3-methyl-3,4,5,6,7,12a-hexahydro-2H-benzo[a]anthracene-1,12-dione	3.62	level1			311.127	175.2	POS	C19H20O5		1005178-51-7		Polyketides	聚酮	Polycyclic aromatic polyketides	Angucyclines	CRULJZWXPCYLAC-UHFFFAOYSA-N	1.82399e-05	2.66523e-05	2.7431e-05	2.41077e-05	7.88098e-06	1.03859e-05	4.466e-06	7.57763e-06	1.41429	0.00832133	0.141156	0.314324	-1.66968
677	5-(5-methoxycarbonyl-5,8a-dimethyl-2-methylene-decalin-1-yl)-3-methyl-pentanoic acid	3.61	level1			349.241	332.9	NEG	C21H34O4				Terpenoids	萜类	Diterpenoids	Labdane diterpenoids	WTDIRAZPDUAJEB-UHFFFAOYSA-N	2.29076e-06	3.16222e-06	2.16867e-06	2.54055e-06	5.75322e-06	7.17915e-06	1.1762e-05	8.23145e-06	1.43156	0.0364376	0.22958	3.24003	1.69601
687	3,8-dihydroxy-2,7,7,11,15-pentamethyl-5,12,14-trioxapentacyclo[9.8.0.02,8.04,6.013,18]nonadec-13(18)-en-17-one	3.58	level1			377.2	274	NEG	C21H30O6				Terpenoids	萜类			AUONBWBZZQIQQT-UHFFFAOYSA-N	5.10573e-06	3.4383e-05	8.76646e-06	1.60851e-05	0.000135467	0.000156639	0.000275576	0.000189227	1.41861	0.0177655	0.178644	11.7642	3.55633
691	8-acetoxy-10-hydroxy-19-methoxy-1,9,18-trimethyl-15-oxo-16,20-dioxahexacyclo[15.3.2.02,13.04,12.07,11.014,19]docos-5-ene-5-carboxylic acid	3.56	level1			503.224	275.7	NEG	C27H36O9				Terpenoids	萜类			LFQXXBVNHBMYJD-UHFFFAOYSA-N	5.8064e-06	4.00118e-06	1.1016e-06	3.63639e-06	1.27812e-05	1.00923e-05	1.11044e-05	1.1326e-05	1.23016	0.00821663	0.140709	3.11462	1.63906
700	Guanfu base A	3.51	level1			430.229	47.7	POS	C24H31NO6		1394-48-5		Alkaloids	生物碱	Pseudoalkaloids	Terpenoid alkaloids	OGNUSOJAYIHLNS-DVBURBJDSA-N	1.16195e-05	9.09872e-06	8.45365e-06	9.72394e-06	1.90041e-06	1.49115e-06	8.11788e-07	1.40111e-06	1.50433	0.00121296	0.0812559	0.144089	-2.79497
701	(3R,4S)-4,6,8-trihydroxy-7-methoxy-3-methyl-isochroman-1-one	3.51	level1			239.059	242.5	NEG	C11H12O6		153765-43-6		Shikimates and Phenylpropanoids	莽草酸及苯丙酸类	Coumarins	Isocoumarins	ZLLQQKITWRWKTD-SPGJFGJESA-N	0.00010165	0.000113273	0.000111171	0.000108698	0.000183053	0.000144188	0.000134855	0.000154032	1.34836	0.0405253	0.236943	1.41706	0.502906
710	(2R,3R,4S,5S,6R)-2-[(3R)-1,7-bis(3,4-dihydroxyphenyl)heptan-3-yl]oxy-6-(hydroxymethyl)oxane-3,4,5-triol	2.75	level2			493.208	222.5	NEG	C25H34O10				Shikimates and Phenylpropanoids	莽草酸及苯丙酸类	Diarylheptanoids	Linear diarylheptanoids	LSEDQFLRUJOXDX-SBOHWPTNSA-N	0.000218504	0.000103857	0.000172176	0.000164846	4.05165e-05	3.15728e-05	1.67429e-05	2.96108e-05	1.4462	0.0164549	0.17492	0.179627	-2.47692
713	7-{[(2E,6E)-3,7,11-trimethyldodeca-2,6,10-trien-1-yl]oxy}chromen-2-one	2.75	level2			367.23	170.6	POS	C24H30O3				Shikimates and Phenylpropanoids	莽草酸及苯丙酸类	Coumarins	Simple coumarins	GNMUGVNEWCZUAA-WOWYBKFKSA-N	8.40485e-07	1.74597e-06	7.15469e-07	1.10064e-06	2.83602e-06	2.73297e-06	4.00401e-06	3.191e-06	1.36662	0.0159777	0.173741	2.89922	1.53567
715	Veraguensin	2.75	level2			395.18	149.9	POS	C22H28O5				Shikimates and Phenylpropanoids	莽草酸及苯丙酸类	Lignans	Furanoid lignans	JLJAVUZBHSLLJL-GKHNXXNSSA-N	1.03586e-05	9.03638e-06	9.11277e-06	9.50258e-06	3.40839e-06	5.55641e-06	4.91718e-06	4.62733e-06	1.44115	0.00314839	0.106633	0.486955	-1.03814
731	Osajin	2.74	level2			405.17	155	POS	C25H24O5				Shikimates and Phenylpropanoids	莽草酸及苯丙酸类	Isoflavonoids	Isoflavones	DCTLJGWMHPGCOS-UHFFFAOYSA-N	1.60986e-05	1.51203e-05	1.5928e-05	1.57156e-05	7.54691e-06	6.22002e-06	4.91953e-06	6.22882e-06	1.50452	0.000313251	0.0555915	0.396346	-1.33517
732	Feruloyl quinic acid (isomer of 887, 888)	2.74	level2			367.103	141.2	NEG	C17H20O9				Shikimates and Phenylpropanoids	莽草酸及苯丙酸类	Phenylpropanoids (C6-C3)	Cinnamic acids and derivatives	RAGZUCNPTLULOL-UHFFFAOYSA-N	2.62713e-05	1.38872e-05	5.30302e-05	3.10629e-05	7.1363e-05	7.41351e-05	5.712e-05	6.75393e-05	1.19311	0.0453341	0.237455	2.17428	1.12054
733	ISOPALMITIC ACID	2.74	level2			255.233	18.5	NEG	C16H32O2	HMDB0031068	4669-02-7		Fatty acids	脂肪酸	Fatty Acids and Conjugates	Branched fatty acids	ZONJATNKKGGVSU-UHFFFAOYSA-N	5.32645e-05	5.78347e-05	6.15732e-05	5.75575e-05	7.58092e-05	6.61571e-05	7.57044e-05	7.25569e-05	1.38325	0.0199749	0.186529	1.2606	0.33411
737	4-Hydroxybenzyl cyanide	2.73	level2			132.045	182.9	NEG	C8H7NO	HMDB0029757	14191-95-8	C03766					AYKYOOPFBCOXSL-UHFFFAOYSA-N	7.07536e-05	7.31383e-05	5.68678e-05	6.69199e-05	3.86785e-05	4.19672e-05	1.80338e-05	3.28932e-05	1.26862	0.0197514	0.185721	0.491531	-1.02465
743	Avocadyne Acetate	2.73	level2			325.238	265.6	NEG	C19H34O4	HMDB0031048	24607-06-5						JAKAZHIACKJNNB-UHFFFAOYSA-N	6.79898e-06	3.26523e-05	1.42828e-05	1.79114e-05	9.79972e-05	7.00036e-05	9.81687e-05	8.87232e-05	1.37588	0.00426336	0.114739	4.95346	2.30844
750	3-Heptanone, 7-(3,4-dihydroxyphenyl)-5-hydroxy-1-(4-hydroxyphenyl)-	2.73	level2			329.139	190.8	NEG	C19H22O5				Shikimates and Phenylpropanoids	莽草酸及苯丙酸类	Diarylheptanoids	Linear diarylheptanoids	OAGXTVOZBKKJKA-UHFFFAOYSA-N	6.71391e-05	7.07948e-05	9.62052e-05	7.80463e-05	3.52935e-05	2.88975e-05	2.01125e-05	2.81012e-05	1.45031	0.00791059	0.138551	0.360058	-1.4737
761	(2R,3S,4S,5R,6R)-5-[(2S,3R,4R)-3,4-dihydroxy-4-(hydroxymethyl)oxolan-2-yl]oxy-2-(hydroxymethyl)-6-(2-phenylethoxy)oxane-3,4-diol	2.73	level2			439.158	149.4	POS	C19H28O10				Shikimates and Phenylpropanoids	莽草酸及苯丙酸类	Phenylethanoids (C6-C2)	Phenylethanoids	UWKRNCNWJVCHGZ-DERWZFJFSA-N	2.58916e-05	1.93655e-05	3.41293e-05	2.64621e-05	1.35013e-05	1.16952e-05	6.20046e-06	1.04657e-05	1.32656	0.0290852	0.212335	0.395496	-1.33827
762	(2R,3R,4S,5S,6R)-2-[2-(4-methoxyphenyl)ethoxy]-6-[[(2S,3R,4S,5S)-3,4,5-trihydroxyoxan-2-yl]oxymethyl]oxane-3,4,5-triol	2.73	level2			445.171	146.6	NEG	C20H30O11				Shikimates and Phenylpropanoids	莽草酸及苯丙酸类	Phenylethanoids (C6-C2)	Phenylethanoids	LQUPEGJECBPTCO-KDRUZJHHSA-N	2.81793e-05	2.51211e-05	4.06291e-05	3.13098e-05	4.7272e-06	6.58307e-06	8.74227e-06	6.68418e-06	1.48832	0.00726269	0.136574	0.213485	-2.22779
770	(2R)-2,8-Dimethyl-2-[(3E,7E)-4,8,12-trimethyl-3,7,11-tridecatrien-1-yl]-6-chromanol	2.72	level2			419.293	335.3	POS	C27H40O2	HMDB0030008	25612-59-3	C14156	Terpenoids	萜类	Meroterpenoids	Prenyl quinone meroterpenoids	ODADKLYLWWCHNB-LDYBVBFYSA-N	2.62921e-06	2.00481e-06	3.63306e-06	2.75569e-06	7.48228e-06	5.56793e-06	6.32831e-06	6.45951e-06	1.43666	0.00715297	0.136229	2.34406	1.22901
771	Haplophytine	2.72	level2			653.298	281.8	POS	C37H40N4O7				Alkaloids	生物碱	Tryptophan alkaloids	Aspidosperma type	SFSFAWRKKRGBKI-ZLEWMSNTSA-N	4.14992e-06	9.73767e-06	5.88536e-06	6.59098e-06	2.56136e-05	1.54309e-05	2.40281e-05	2.16909e-05	1.40267	0.0133519	0.16351	3.291	1.71852
774	Lonchocarpenin	2.72	level2			449.196	141	POS	C27H28O6				Shikimates and Phenylpropanoids	莽草酸及苯丙酸类	Coumarins	Pyranocoumarins	CCYKXDPVYWRNMH-UHFFFAOYSA-N	6.55441e-06	1.11306e-05	8.60663e-06	8.76389e-06	4.64755e-06	2.54752e-06	3.7566e-06	3.65056e-06	1.37489	0.0246611	0.200372	0.416545	-1.26346
780	Undecanedioic acid	2.72	level2			215.129	227.1	NEG	C11H20O4	HMDB0000888	1852-04-6		Fatty acids	脂肪酸	Fatty Acids and Conjugates	Dicarboxylic acids	LWBHHRRTOZQPDM-UHFFFAOYSA-N	1.92687e-05	3.15886e-05	2.1808e-05	2.42218e-05	7.70235e-05	4.62594e-05	7.24201e-05	6.52343e-05	1.42367	0.0163233	0.174645	2.69321	1.42933
781	beta-D-Glucopyranoside, 4-hydroxy-2-(hydroxymethyl)phenyl, 6-benzoate	2.72	level2			429.117	217	POS	C20H22O9				Shikimates and Phenylpropanoids	莽草酸及苯丙酸类	Phenolic acids (C6-C1)	Simple phenolic acids	FLROYCKIIJCTDY-BFMVXSJESA-N	1.31632e-05	1.19377e-05	1.17594e-05	1.22868e-05	2.33613e-05	1.63743e-05	1.8816e-05	1.95172e-05	1.40643	0.0259941	0.204318	1.58847	0.667639
783	Paeonolide	2.72	level2			483.139	196.2	POS	C20H28O12				Polyketides	聚酮	Phloroglucinols	Acyl phloroglucinols	IDZZECHGWAZTIB-NYBIBFQCSA-N	6.98302e-06	4.02734e-06	8.40672e-06	6.47236e-06	1.39136e-06	2.9473e-06	7.80274e-07	1.70631e-06	1.32486	0.0297937	0.213968	0.26363	-1.92341
784	5-[6-(3-hydroxy-4-methoxyphenyl)-1,3,3a,4,6,6a-hexahydrofuro[3,4-c]furan-3-yl]-2-methoxyphenol	2.72	level2			357.134	192.7	NEG	C20H22O6				Shikimates and Phenylpropanoids	莽草酸及苯丙酸类	Lignans	Furofuranoid lignans	VRHZMFGDDGFRLP-UHFFFAOYSA-N	4.28317e-05	4.52155e-05	6.35531e-05	5.05334e-05	3.67448e-05	2.36932e-05	2.1051e-05	2.7163e-05	1.29106	0.0455455	0.237455	0.537525	-0.895596
786	p-Coumaraldehyde	2.72	level2			147.045	187.3	NEG	C9H8O2				Shikimates and Phenylpropanoids	莽草酸及苯丙酸类	Phenylpropanoids (C6-C3)		CJXMVKYNVIGQBS-UHFFFAOYSA-N	0.000170909	0.000214748	0.000195373	0.000193677	6.26363e-05	6.54936e-05	0.000139315	8.91482e-05	1.31045	0.0205233	0.188435	0.460294	-1.11937
788	CROTONIC ACID	2.72	level2			85.0293	182.2	NEG	C4H6O2	HMDB0010720	3724-65-0	C01771	Fatty acids	脂肪酸	Fatty Acids and Conjugates	Unsaturated fatty acids	LDHQCZJRKDOVOX-NSCUHMNNSA-N	2.89932e-05	3.38684e-05	3.81263e-05	3.36626e-05	1.82362e-05	2.6264e-05	1.51567e-05	1.98856e-05	1.30564	0.0312502	0.217989	0.590734	-0.759419
789	Irisflorentin	2.72	level2			409.089	181.9	POS	C20H18O8				Shikimates and Phenylpropanoids	莽草酸及苯丙酸类	Isoflavonoids	Isoflavones	RISXUTCDCPHJFQ-UHFFFAOYSA-N	7.0295e-05	7.34464e-05	8.3505e-05	7.57488e-05	2.9706e-05	3.8775e-05	2.75362e-05	3.20057e-05	1.50594	0.00114588	0.0803824	0.422524	-1.24289
798	(Z)-3-[4-methoxy-2-[(2S,3R,4S,5S,6R)-3,4,5-trihydroxy-6-(hydroxymethyl)oxan-2-yl]oxyphenyl]prop-2-enoic acid	2.72	level2			374.144	146.3	POS	C16H20O9				Shikimates and Phenylpropanoids	莽草酸及苯丙酸类	Phenylpropanoids (C6-C3)	Cinnamic acids and derivatives	FQWZGEBZILOCET-QEQKPWIDSA-N	4.74332e-06	4.08878e-06	4.61587e-06	4.48266e-06	3.36616e-06	2.58161e-06	1.23207e-06	2.39328e-06	1.18331	0.0331621	0.222247	0.533898	-0.905363
805	(2Z,6E)-6-methyl-2-(4-methylpent-3-enyl)octa-2,6-dienoic acid	2.72	level2			235.17	270.7	NEG	C15H24O2				Terpenoids	萜类	Sesquiterpenoids	Farnesane sesquiterpenoids	JWBZQRMMZRWOSE-RINCWYSCSA-N	2.92513e-06	3.84381e-06	2.90012e-06	3.22302e-06	7.58135e-06	5.52858e-06	9.08916e-06	7.3997e-06	1.43596	0.0179008	0.179173	2.29589	1.19905
807	(E)-5-hydroxyundec-2-enoic acid	2.72	level2			199.134	234.3	NEG	C11H20O3				Fatty acids	脂肪酸	Fatty Acids and Conjugates	Hydroxy fatty acids	MWMIRIBJWGECFI-RMKNXTFCSA-N	2.35611e-05	3.18766e-05	2.55069e-05	2.69815e-05	6.91165e-05	6.36872e-05	9.90504e-05	7.72847e-05	1.48597	0.0111586	0.154731	2.86436	1.51821
810	Jervine	2.71	level2			426.299	303.5	POS	C27H39NO3	HMDB0253731			Alkaloids	生物碱	Pseudoalkaloids	Steroidal alkaloids	CLEXYFLHGFJONT-UHFFFAOYSA-N	1.73996e-06	5.9216e-06	1.39014e-06	3.01724e-06	1.76275e-05	2.78686e-05	2.94398e-05	2.49786e-05	1.42886	0.00526245	0.122603	8.27865	3.0494
816	Ethanone, 1-[4-[(6-O-beta-D-xylopyranosyl-beta-D-glucopyranosyl)oxy]phenyl]-	2.71	level2			453.136	26.6	POS	C19H26O11								YQOKGDRMWQLQNR-BMVMOQKNSA-N	5.44078e-09	2.09867e-06	6.1054e-07	9.04883e-07	1.3144e-05	7.29379e-06	1.60024e-05	1.21467e-05	1.16034	0.0130266	0.16214	13.4235	3.74669
821	Epimedoside A	2.71	level2			663.228	218.4	POS	C32H38O15				Shikimates and Phenylpropanoids	莽草酸及苯丙酸类	Flavonoids	Flavonols	OGYXOOJUJQIDOX-FVCAYHPDSA-N	7.36023e-07	8.14635e-07	8.17631e-07	7.8943e-07	3.75838e-07	2.35756e-07	6.20717e-07	4.1077e-07	1.2226	0.0306452	0.216458	0.520338	-0.94248
822	3-Indoleacetonitrile	2.71	level2			155.061	208	NEG	C10H8N2	HMDB0006524	771-51-7	C02938	Alkaloids	生物碱	Tryptophan alkaloids	Simple indole alkaloids	DMCPFOBLJMLSNX-UHFFFAOYSA-N	0.00237254	0.0014587	0.00177557	0.00186893	0.000453235	0.000309651	0.000150094	0.000304326	1.45877	0.00515238	0.122188	0.162834	-2.61852
830	Tetrahydropiperine	2.71	level2			290.17	33.2	POS	C17H23NO3				Alkaloids	生物碱	Lysine alkaloids	Piperidine alkaloids	APZYKUZPJCQGPP-UHFFFAOYSA-N	1.58908e-06	6.69739e-06	4.63571e-06	4.30739e-06	1.50978e-05	1.01218e-05	2.38585e-05	1.63593e-05	1.28089	0.0480508	0.237455	3.79797	1.92523
835	Pummeline	2.7	level2			272.091	198.4	POS	C15H13NO4	HMDB0040382	145940-36-9		Alkaloids	生物碱	Anthranilic acid alkaloids	Acridone alkaloids	ULFQWNWPHHCZAJ-UHFFFAOYSA-N	7.97022e-05	6.73594e-05	7.78905e-05	7.4984e-05	5.72615e-05	5.73212e-05	3.93553e-05	5.13127e-05	1.28041	0.0291249	0.212347	0.684315	-0.547267
836	Acronycidine	2.7	level2			290.101	198.4	POS	C15H15NO5				Alkaloids	生物碱	Tryptophan alkaloids	Quinoline alkaloids	XTCGYRFLVLFRGW-UHFFFAOYSA-N	8.59495e-05	6.91049e-05	8.32479e-05	7.94341e-05	5.72263e-05	5.56472e-05	4.14466e-05	5.144e-05	1.35614	0.0180678	0.179776	0.647581	-0.626867
837	3,4-Dihydrocoumarin	2.7	level2			149.059	186.4	POS	C9H8O2	HMDB0036626	119-84-6	C02274	Shikimates and Phenylpropanoids	莽草酸及苯丙酸类			VMUXSMXIQBNMGZ-UHFFFAOYSA-N	1.86239e-05	2.21737e-05	1.87487e-05	1.98488e-05	7.27351e-06	8.58314e-06	1.47374e-05	1.0198e-05	1.32125	0.0200646	0.186688	0.513786	-0.960762
839	BETA-Febrifugine	2.7	level2			302.149	161.6	POS	C16H19N3O3				Alkaloids	生物碱	Anthranilic acid alkaloids	Quinazoline alkaloids	FWVHWDSCPKXMDB-GJZGRUSLSA-N	3.81768e-05	7.65584e-05	6.59845e-05	6.02399e-05	0.00010027	0.000101613	0.000113507	0.00010513	1.26157	0.0211827	0.190559	1.74519	0.803383
847	Rosarin	2.7	level2			451.149	211.7	POS	C20H28O10				Shikimates and Phenylpropanoids	莽草酸及苯丙酸类	Phenylpropanoids (C6-C3)	Cinnamic acids and derivatives	IEBFEMIXXHIISM-YZOUKVLTSA-N	0.000219058	0.000135089	0.000290096	0.000214748	4.40012e-05	1.91359e-05	5.98802e-06	2.30417e-05	1.39024	0.0142293	0.167055	0.107297	-3.22032
849	Esculin	2.7	level2			339.073	188.1	NEG	C15H16O9				Shikimates and Phenylpropanoids	莽草酸及苯丙酸类	Coumarins	Simple coumarins	XHCADAYNFIFUHF-UHFFFAOYSA-N	6.63042e-05	8.11185e-05	7.59091e-05	7.44439e-05	4.84646e-05	3.35884e-05	5.1822e-05	4.4625e-05	1.35216	0.0136086	0.164629	0.599445	-0.738302
850	Ibuprofen	2.7	level2			207.137	187.8	POS	C13H18O2	HMDB0001925	15687-27-1	C01588					HEFNNWSXXWATRW-UHFFFAOYSA-N	2.41336e-05	1.85427e-05	2.44701e-05	2.23822e-05	1.05168e-05	1.67564e-05	1.07675e-05	1.26802e-05	1.33424	0.0257717	0.203678	0.566534	-0.819766
854	TROPIC ACID	2.7	level2			165.055	170.4	NEG	C9H10O3	HMDB0062590	552-63-6	C01456	Shikimates and Phenylpropanoids	莽草酸及苯丙酸类			JACRWUWPXAESPB-UHFFFAOYSA-N	2.44868e-05	3.09431e-05	1.59535e-05	2.37945e-05	6.44554e-05	8.38835e-05	7.63509e-05	7.48966e-05	1.4581	0.00200557	0.0936565	3.14765	1.65427
856	(1S,4aR,5S,7aS)-5-Hydroxy-7-(hydroxymethyl)-1,4a,5,7a-tetrahydrocyclopenta[c]pyran-1-yl beta-D-glucopyranoside	2.7	level2			369.117	150.8	POS	C15H22O9				Terpenoids	萜类	Monoterpenoids	Iridoids monoterpenoids	RJWJHRPNHPHBRN-FKVJWERZSA-N	0.00133836	0.00121485	0.000684755	0.00107932	2.7263e-05	2.29174e-05	8.60816e-06	1.95962e-05	1.52909	0.0338867	0.224049	0.0181561	-5.7834
859	Di-n-butyl phthalate	2.7	level2			279.158	60.4	POS	C16H22O4	HMDB0033244	84-74-2	C14214	Shikimates and Phenylpropanoids	莽草酸及苯丙酸类	Phenolic acids (C6-C1)	Shikimic acids and derivatives	DOIRQSBPFJWKBE-UHFFFAOYSA-N	0.000112374	0.000126089	0.000122733	0.000120399	0.000160671	0.000143642	0.000160531	0.000154948	1.44679	0.0078398	0.138212	1.28696	0.363962
860	PSEUDO-ANISATIN	2.7	level2			321.13	43.1	POS	C15H22O6				Terpenoids	萜类	Sesquiterpenoids	Prezizaane sesquiterpenoids	NOHXYGXFTACADH-JHLBFKOCSA-N	0.000560923	0.000291524	0.000496457	0.000449635	0.000140938	0.000111755	8.23604e-05	0.000111684	1.45649	0.0151761	0.170494	0.248389	-2.00933
862	alpha-Methyl-DL-serine	2.7	level2			118.051	23.2	NEG	C4H9NO3				Amino acids and Peptides	氨基酸及短肽	Small peptides	Aminoacids	CDUUKBXTEOFITR-UHFFFAOYSA-N	0.000162366	0.000150819	0.00017079	0.000161325	0.000187467	0.000226401	0.00022719	0.000213686	1.38211	0.0217086	0.192393	1.32456	0.405518
866	Uridine 5'-diphosphate (UDP)	2.69	level2			405.008	130.7	POS	C9H14N2O12P2	HMDB0000295	58-98-0	C00015	Carbohydrates	碳水化合物	Nucleosides		XCCTYIAWTASOJW-XVFCMESISA-N	6.6315e-06	7.40832e-06	6.57399e-06	6.87127e-06	1.44155e-06	1.84641e-06	4.57292e-07	1.24842e-06	1.41822	0.000335658	0.0568472	0.181687	-2.46048
871	(+)-Costunolide	2.69	level2			233.153	231.4	POS	C15H20O2				Terpenoids	萜类	Sesquiterpenoids	Germacrane sesquiterpenoids	HRYLQFBHBWLLLL-AHNJNIBGSA-N	7.01493e-06	1.46156e-05	9.76498e-06	1.04652e-05	2.03603e-05	2.03088e-05	3.33414e-05	2.46702e-05	1.32423	0.0434276	0.237455	2.35736	1.23717
881	13-OxoODE	2.69	level2			317.208	281.7	POS	C18H30O3	HMDB0004668		C14765	Fatty acids	脂肪酸	Fatty Acids and Conjugates	Oxo fatty acids	JHXAZBBVQSRKJR-BSZOFBHHSA-N	4.94577e-05	7.27351e-05	2.88268e-05	5.03399e-05	0.000119253	0.000114657	0.000196434	0.000143448	1.33372	0.0339659	0.224163	2.84958	1.51075
884	1,2-dihydroxyheptadec-16-yn-4-yl acetate	2.69	level2			349.236	261.3	POS	C19H34O4	HMDB0031049	28884-46-0						FHGZOCAZNHYWAL-UHFFFAOYSA-N	4.57445e-05	9.8655e-05	5.70476e-05	6.7149e-05	0.000123967	0.000108487	0.000139912	0.000124122	1.25455	0.0367605	0.230127	1.84846	0.886322
889	CAPSAICIN	2.69	level2			306.205	187.2	POS	C18H27NO3	HMDB0002227	404-86-4	C06866	Alkaloids	生物碱	Pseudoalkaloids	Capsaicins and Capsaicinoids	YKPUWZUDDOIDPM-SOFGYWHQSA-N	1.15183e-06	2.61139e-06	1.62553e-06	1.79625e-06	7.07133e-06	7.62781e-06	9.17012e-06	7.95642e-06	1.4775	0.00126485	0.082371	4.42947	2.14713
900	PHENYLETHANOLAMINE	2.69	level2			120.08	33.3	POS	C8H11NO	HMDB0001065	7568-93-6	C02735	Alkaloids	生物碱	Tyrosine alkaloids	Phenylethylamines	ULSIYEODSMZIPX-UHFFFAOYSA-N	0.000145895	0.000171852	0.000200548	0.000172765	0.000605794	0.00071858	0.000756311	0.000693562	1.538	0.000405875	0.0592624	4.01449	2.00522
901	(R)-5,7-dihydroxy-2-(4-hydroxyphenyl)chroman-4-one	2.69	level2			273.081	26.7	POS	C15H12O5				Shikimates and Phenylpropanoids	莽草酸及苯丙酸类	Flavonoids	Flavanones	FTVWIRXFELQLPI-CYBMUJFWSA-N	8.11027e-05	9.69663e-05	0.000111018	9.63622e-05	5.74409e-05	3.87707e-05	6.47323e-06	3.42283e-05	1.11023	0.022564	0.194896	0.355205	-1.49328
904	PC(P-19:0)	2.69	level2			536.37	305.1	POS	C27H54NO7P								MQPMZOIIFNBSDM-AYICAFKVSA-N	0.000115128	0.000102968	9.36332e-05	0.00010391	0.000417743	0.00029009	0.000303368	0.000337067	1.52006	0.0265911	0.206015	3.24384	1.6977
909	alpha-licanic_acid	2.68	level2			293.21	351.5	POS	C18H28O3				Fatty acids	脂肪酸	Octadecanoids	Other Octadecanoids	DTRGDWOPRCXRET-WPOADVJFSA-N	5.62807e-06	8.7394e-06	4.55063e-06	6.30603e-06	1.14955e-05	1.31464e-05	1.98487e-05	1.48302e-05	1.33696	0.0401398	0.236238	2.35174	1.23373
912	Piperaduncin_A	2.68	level2			491.207	267.9	POS	C29H30O7				Shikimates and Phenylpropanoids	莽草酸及苯丙酸类	Flavonoids	Chalcones	UWDJCYWVPNETPR-UHFFFAOYSA-N	1.50184e-05	1.96606e-05	2.82849e-05	2.0988e-05	5.66522e-05	4.24335e-05	5.00907e-05	4.97255e-05	1.42605	0.00707542	0.135497	2.36924	1.24442
913	O-Isopentenylhalfordinol	2.68	level2			307.143	264.6	POS	C19H18N2O2	HMDB0030308	17190-80-6		Alkaloids	生物碱	Tyrosine alkaloids	Oxazole alkaloids	CPMFTHYYYPZYOB-UHFFFAOYSA-N	6.33848e-05	8.74762e-05	8.20093e-05	7.76234e-05	0.000115682	0.000118544	9.6299e-05	0.000110175	1.29072	0.0321829	0.220108	1.41935	0.505235
914	Methylephedrine	2.68	level2			180.138	259.2	POS	C11H17NO				Alkaloids	生物碱	Pseudoalkaloids	Phenylalanine-derived alkaloids	FMCGSUUBYTWNDP-ONGXEEELSA-N	2.6442e-05	4.97476e-05	4.25744e-05	3.9588e-05	0.000138942	7.86023e-05	9.01896e-05	0.000102578	1.37339	0.0331335	0.222247	2.59114	1.37359
918	6-Butyltetrahydro-2H-pyran-2-one	2.68	level2			157.122	238.8	POS	C9H16O2	HMDB0031514	3301-94-8		Fatty acids	脂肪酸	Fatty esters	Lactones	PXRBWNLUQYZAAX-UHFFFAOYSA-N	1.90181e-06	7.64789e-06	2.83006e-06	4.12659e-06	1.84944e-05	1.61232e-05	2.88811e-05	2.11662e-05	1.38505	0.016685	0.175653	5.12923	2.35874
919	Heliannuol_B	2.68	level2			249.148	224.1	POS	C15H20O3	HMDB0035132	161730-07-0		Terpenoids	萜类	Meroterpenoids		WYQLDPBFXNVPJE-UHFFFAOYSA-N	1.33085e-05	3.23988e-05	1.8587e-05	2.14314e-05	5.8261e-05	5.10102e-05	8.47837e-05	6.4685e-05	1.37653	0.0211085	0.190264	3.01823	1.5937
924	6-Deoxyfagomine	2.68	level2			132.101	27.2	POS	C6H13NO2	HMDB0036382	197449-09-5		Alkaloids	生物碱	Lysine alkaloids		RMJCALHKIHCSMY-UHFFFAOYSA-N	0.00277174	0.00125882	0.00325353	0.00242803	0.00532276	0.00624649	0.00734181	0.00630369	1.34568	0.00983011	0.147999	2.59621	1.37641
933	[(2R,3S,4S,5R,6S)-3,4,5-trihydroxy-6-(4-hydroxyphenoxy)oxan-2-yl]methyl (E)-3-(3,4-dihydroxyphenyl)prop-2-enoate	2.68	level2			433.113	197.4	NEG	C21H22O10				Shikimates and Phenylpropanoids	莽草酸及苯丙酸类	Phenylpropanoids (C6-C3)	Cinnamic acids and derivatives	OONDLKCAZJZRCW-CTPWMPFQSA-N	3.23148e-05	4.06631e-05	3.82312e-05	3.70697e-05	1.04185e-05	1.79493e-05	8.90616e-06	1.24246e-05	1.45529	0.00273894	0.103009	0.33517	-1.57703
935	4-[4-[hydroxy-(4-hydroxy-3-methoxyphenyl)methyl]-3-(hydroxymethyl)oxolan-2-yl]-2-methoxyphenol	2.68	level2			375.144	174.3	NEG	C20H24O7				Shikimates and Phenylpropanoids	莽草酸及苯丙酸类	Lignans	Furanoid lignans	MWQRAOGWLXTMIC-UHFFFAOYSA-N	4.5876e-05	3.26374e-05	6.17546e-05	4.6756e-05	9.82513e-06	7.58817e-06	1.40864e-05	1.04999e-05	1.46264	0.013683	0.164822	0.224568	-2.15477
937	(2R,3S)-2-[(3,4-dihydroxyphenyl)methyl]-2-hydroxy-3-[(E)-3-(3-hydroxy-4-methoxyphenyl)prop-2-enoyl]oxybutanedioic acid [IIN-based	2.68	level2			466.133	159.8	POS	C21H20O11				Shikimates and Phenylpropanoids	莽草酸及苯丙酸类	Phenylpropanoids (C6-C3)	Cinnamic acids and derivatives	YVHLLZXSGPDXOA-ZHBFVYIWSA-N	1.09179e-05	9.58506e-06	1.59488e-05	1.21506e-05	4.92894e-06	2.65338e-06	4.22042e-06	3.93425e-06	1.42281	0.0160495	0.173975	0.323791	-1.62687
938	leonurine	2.68	level2			334.139	146.5	POS	C14H21N3O5	HMDB0254014		C16985	Shikimates and Phenylpropanoids	莽草酸及苯丙酸类	Phenolic acids (C6-C1)	Simple phenolic acids	WNGSUWLDMZFYNZ-UHFFFAOYSA-N	2.19558e-05	4.10388e-05	3.85935e-05	3.38627e-05	7.42159e-05	8.33626e-05	6.16184e-05	7.30656e-05	1.36346	0.0107682	0.152782	2.1577	1.1095
940	5,7-dihydroxy-2-(4-hydroxyphenyl)-6,8-bis(3,4,5-trihydroxyoxan-2-yl)chromen-4-one	2.68	level2			557.126	34.7	POS	C25H26O13				Shikimates and Phenylpropanoids	莽草酸及苯丙酸类	Flavonoids	Flavones	LDVNKZYMYPZDAI-UHFFFAOYSA-N	1.16647e-05	1.72085e-05	2.10804e-05	1.66512e-05	9.47648e-06	8.19452e-06	3.94428e-06	7.20509e-06	1.25503	0.0420144	0.237455	0.432707	-1.20854
946	Ethyl palmitate	2.68	level2			283.264	17.1	NEG	C18H36O2				Fatty acids	脂肪酸	Fatty esters	Wax monoesters	XIRNKXNNONJFQO-UHFFFAOYSA-N	1.97432e-05	1.82624e-05	2.13293e-05	1.97783e-05	3.11005e-05	2.4042e-05	2.73167e-05	2.74864e-05	1.38514	0.0256552	0.203394	1.38973	0.474801
954	Dicoumaroyl Spermidine	2.67	level2			438.238	172.6	POS	C25H31N3O4				Alkaloids	生物碱	Ornithine alkaloids	Polyamines	QYBCBMVQSCJMSA-UHFFFAOYSA-N	0.000295433	0.000248924	0.000145466	0.000229941	0.000538949	0.000420383	0.000715572	0.000558301	1.34309	0.0272419	0.207492	2.42802	1.27978
958	DGMG 18:3	2.67	level2			675.359	273.9	NEG	C33H56O14				Fatty acids	脂肪酸	Glycerolipids	Glycosylmonoacylglycerols	MPSGDHOYFIUPSO-UHFFFAOYSA-N	1.24215e-05	7.96351e-06	1.35562e-05	1.13138e-05	4.88235e-06	2.37027e-06	2.62265e-06	3.29176e-06	1.41542	0.0130853	0.162433	0.290951	-1.78115
960	Bruceine D	2.67	level2			433.138	233.2	POS	C20H26O9				Terpenoids	萜类	Triterpenoids	Quassinoids	JBDMZGKDLMGOFR-KQSRGDCESA-N	3.06862e-05	4.56397e-05	2.89311e-05	3.50857e-05	2.4063e-06	5.02526e-06	5.7735e-06	4.40169e-06	1.49928	0.00473097	0.118296	0.125455	-2.99475
961	4-[5-(4-hydroxy-3,5-dimethoxyphenyl)-3,4-dimethyloxolan-2-yl]-2,6-dimethoxyphenol [IIN-based on	2.67	level2			427.171	212.9	POS	C22H28O7	HMDB0038953	112572-55-1		Shikimates and Phenylpropanoids	莽草酸及苯丙酸类	Lignans	Furanoid lignans	CAUANPLJFMVCHO-UHFFFAOYSA-N	0.000301613	0.000372605	0.000251429	0.000308549	9.81934e-05	0.000109453	0.000128035	0.000111894	1.50688	0.0055778	0.124847	0.362645	-1.46337
963	Flavanone base + 3O, 1Prenyl	2.67	level2			339.124	192	NEG	C20H20O5	HMDB0247465			Shikimates and Phenylpropanoids	莽草酸及苯丙酸类	Flavonoids	Flavanones	LPEPZZAVFJPLNZ-UHFFFAOYSA-N	7.96401e-05	8.03483e-05	0.000107863	8.9284e-05	5.88813e-05	4.10722e-05	3.74194e-05	4.5791e-05	1.38381	0.0189351	0.182493	0.512869	-0.963337
967	6,8-Diprenylorobol	2.67	level2			423.178	155.3	POS	C25H26O6				Shikimates and Phenylpropanoids	莽草酸及苯丙酸类	Isoflavonoids	Isoflavones	OAUIRSVJXOFAOO-UHFFFAOYSA-N	0.000291295	0.000310506	0.0003746	0.000325467	0.000159105	0.000147934	0.000100215	0.000135751	1.46197	0.00360642	0.111484	0.417097	-1.26155
971	Isosulochrin	2.67	level2			355.078	25.9	POS	C17H16O7				Polyketides	聚酮	Aromatic polyketides	Benzophenones	XKIBNYJGNBTYMP-UHFFFAOYSA-N	1.75248e-05	2.7104e-05	2.42819e-05	2.29702e-05	9.81697e-06	9.33433e-06	9.29387e-06	9.48172e-06	1.49073	0.041215	0.237455	0.412783	-1.27654
982	Pipernonaline	2.66	level2			342.205	271.2	POS	C21H27NO3	HMDB0030339	88660-10-0		Alkaloids	生物碱	Lysine alkaloids	Piperidine alkaloids	PKLGRWSJBLGIBF-JMQWPVDRSA-N	1.35945e-05	2.95341e-05	1.63659e-05	1.98315e-05	4.69116e-05	4.4794e-05	5.41204e-05	4.86087e-05	1.3824	0.00710178	0.135729	2.45108	1.29342
983	Kirenol	2.66	level2			339.252	268.4	POS	C20H34O4				Terpenoids	萜类	Diterpenoids	Pimarane and Isopimarane diterpenoids	NRYNTARIOIRWAB-JPDRSCFKSA-N	8.33707e-05	0.00019032	0.000124534	0.000132742	0.000459134	0.000308939	0.000320526	0.000362866	1.38009	0.0160349	0.173949	2.73363	1.45082
988	Periplocin	2.66	level2			719.356	143	POS	C36H56O13				Terpenoids	萜类	Steroids	Cardenolides	KWBPKUMWVXUSCA-AXQDKOMKSA-N	5.44078e-09	5.69788e-09	6.14832e-09	5.76233e-09	6.85906e-09	6.19632e-09	6.61583e-09	6.55707e-09	1.27832	0.048516	0.237455	1.13792	0.1864
989	5-Demethylnobiletin	2.66	level2			411.104	142.1	POS	C20H20O8	HMDB0037571	2174-59-6		Shikimates and Phenylpropanoids	莽草酸及苯丙酸类	Flavonoids	Flavones	DOFJNFPSMUCECH-UHFFFAOYSA-N	1.90577e-05	1.04419e-05	1.71196e-05	1.55397e-05	8.51134e-06	1.49929e-06	1.99409e-06	4.00158e-06	1.26944	0.0287643	0.21125	0.257506	-1.95732
992	9-oxo-nonanoic_acid	2.65	level2			173.117	256.6	POS	C9H16O3	HMDB0094711		C16322	Fatty acids	脂肪酸	Fatty Acids and Conjugates	Oxo fatty acids	WLGDDELKYAWBBL-UHFFFAOYSA-N	6.05424e-06	3.03575e-05	9.67606e-06	1.53626e-05	5.76706e-05	5.77372e-05	0.000104495	7.3301e-05	1.33554	0.0287854	0.21125	4.77139	2.25441
996	Loline	2.65	level2			155.117	340.9	POS	C8H14N2O				Alkaloids	生物碱	Ornithine alkaloids	Pyrrolizidine alkaloids	OPMNROCQHKJDAQ-FKSUSPILSA-N	9.19909e-06	1.02407e-05	1.09764e-05	1.01387e-05	1.20965e-05	1.15613e-05	1.29265e-05	1.21948e-05	1.31315	0.0342116	0.22461	1.20279	0.266386
1005	Aloin	2.65	level2			441.113	154.7	POS	C21H22O9				Polyketides	聚酮	Polycyclic aromatic polyketides	Anthraquinones and anthrones	AFHJQYHRLPMKHU-WEZNYRQKSA-N	3.59059e-06	4.43766e-06	2.01983e-06	3.34936e-06	4.25728e-05	3.90453e-05	2.64323e-05	3.60168e-05	1.51143	0.0199862	0.186529	10.7533	3.42671
1010	MG(18:1(9Z)/0:0/0:0)	2.64	level2			357.299	284.8	POS	C21H40O4	HMDB0011567	129784-87-8		Fatty acids	脂肪酸	Glycerolipids	Monoacylglycerols	RZRNAYUHWVFMIP-QJRAZLAKSA-N	1.16975e-05	1.79907e-05	1.51654e-05	1.49512e-05	3.59073e-05	3.40468e-05	2.48714e-05	3.16085e-05	1.41371	0.0125613	0.160755	2.11411	1.08005
1011	FA 18:4+1O	2.64	level2			293.21	226.9	POS	C18H28O3				Fatty acids	脂肪酸	Octadecanoids	12-oxophytodienoic acid metabolites	PMTMAFAPLCGXGK-UHFFFAOYSA-N	0.000423696	0.00105048	0.000455755	0.00064331	0.0019521	0.00145483	0.00182932	0.00174542	1.34894	0.0120632	0.158923	2.71318	1.43999
1022	(2S,3R,4S,5S,6R)-2-[4-(2-hydroxyethyl)phenoxy]-6-(hydroxymethyl)oxane-3,4,5-triol	2.64	level2			318.154	140.7	POS	C14H20O7				Shikimates and Phenylpropanoids	莽草酸及苯丙酸类	Phenylethanoids (C6-C2)	Phenylethanoids	OJDSCNUKKOKOQJ-RKQHYHRCSA-N	7.71128e-05	8.82786e-05	3.16175e-05	6.56696e-05	6.96244e-06	1.92612e-05	1.63071e-05	1.41769e-05	1.35287	0.0438612	0.237455	0.215882	-2.21168
1024	Helicide	2.64	level2			307.078	25.2	POS	C13H16O7				Shikimates and Phenylpropanoids	莽草酸及苯丙酸类	Phenolic acids (C6-C1)	Simple phenolic acids	OLZAGZCCJJBKNZ-UJPOAAIJSA-N	3.12162e-06	4.28109e-06	2.73274e-06	3.37848e-06	5.81984e-06	5.9849e-06	7.17088e-06	6.3252e-06	1.40524	0.00948467	0.146754	1.8722	0.904736
1025	4-hydroxy-5-[(2S,3R,4S,5S,6R)-3,4,5-trihydroxy-6-(hydroxymethyl)oxan-2-yl]oxy-1H-benzo[f][2]benzofuran-3-one	2.64	level2			377.085	24.6	NEG	C18H18O9				Polyketides	聚酮	Naphthalenes	Naphthalenes and derivatives	SGQJDTLFQCDZGS-UQEKQVNISA-N	0.00649751	0.0058467	0.00651619	0.0062868	0.00319234	0.00347947	0.00318244	0.00328475	1.54043	0.000237693	0.0528445	0.522484	-0.936543
1032	(-)-Curcumol	2.63	level2			237.184	279.6	POS	C15H24O2				Terpenoids	萜类	Sesquiterpenoids	Guaiane sesquiterpenoids	QRMPRVXWPCLVNI-YYFQZIEXSA-N	3.48277e-06	3.28808e-06	3.29745e-06	3.3561e-06	4.49624e-06	4.28226e-06	4.34747e-06	4.37532e-06	1.53382	0.00034061	0.0568472	1.30369	0.382605
1035	Dehydropipernonaline	2.63	level2			340.19	197.1	POS	C21H25NO3	HMDB0040811	107584-38-3		Alkaloids	生物碱	Lysine alkaloids	Piperidine alkaloids	KAYVDASZRFLFRZ-PQECNABGSA-N	2.58258e-07	4.98372e-07	6.14832e-09	2.54259e-07	1.02778e-06	1.00181e-06	1.71829e-06	1.24929e-06	1.04481	0.022208	0.193786	4.91345	2.29674
1044	PC(37:6)	2.63	level2			792.559	344.3	POS	C45H78NO8P								OGPJJLLSVRJWDH-MQULWMCLSA-N	0.000618568	0.000417247	0.000483843	0.000506552	0.00011602	0.000123943	5.60812e-05	9.86814e-05	1.47982	0.00292808	0.104485	0.19481	-2.35986
1060	(E)-N-[2-hydroxy-2-(4-methoxyphenyl)ethyl]-3-phenylprop-2-enamide [IIN-based on	2.62	level2			320.123	138.4	POS	C18H19NO3	HMDB0033435	37791-13-2		Shikimates and Phenylpropanoids	莽草酸及苯丙酸类	Phenylpropanoids (C6-C3)	Cinnamic acid amides	QRFDENJATPJOKG-KPKJPENVSA-N	7.73951e-06	8.45753e-06	1.00567e-05	8.75125e-06	1.26707e-05	1.29486e-05	1.33584e-05	1.29926e-05	1.45633	0.00401463	0.11319	1.48466	0.570128
1074	Epicatechin gallate	2.61	level2			443.086	195.8	POS	C22H18O10	HMDB0037944	1257-08-5		Shikimates and Phenylpropanoids	莽草酸及苯丙酸类	Flavonoids	Flavan-3-ols	LSHVYAFMTMFKBA-TZIWHRDSSA-N	9.48593e-05	6.34981e-05	9.63175e-05	8.48916e-05	1.0241e-05	7.23667e-06	2.35466e-05	1.36747e-05	1.44382	0.00382358	0.112629	0.161085	-2.63411
1075	(3R,4R,5R)-5-[(E)-3-(3,4-dihydroxyphenyl)prop-2-enoyl]oxy-3,4-dihydroxycyclohexene-1-carboxylic acid	2.61	level2			354.117	189.1	POS	C16H16O8	HMDB0033999	73263-62-4	C10434	Shikimates and Phenylpropanoids	莽草酸及苯丙酸类	Phenylpropanoids (C6-C3)	Cinnamic acids and derivatives	QMPHZIPNNJOWQI-GDDAOPKQSA-N	9.27111e-05	8.53591e-05	8.55106e-05	8.78603e-05	6.58618e-05	5.67486e-05	4.82414e-05	5.69506e-05	1.4334	0.00538434	0.123574	0.648195	-0.6255
1081	2,6-Dimethoxy-4-[(1E)-3-oxo-1-propen-1-yl]phenyl beta-D-glucopyranoside	2.6	level2			393.115	181.7	POS	C17H22O9				Shikimates and Phenylpropanoids	莽草酸及苯丙酸类			OYTCTPHTVUEGCL-GCPOEHJPSA-N	0.000147828	0.000209477	0.000200997	0.000186101	0.000109798	0.000143036	0.000109865	0.0001209	1.30641	0.0427508	0.237455	0.649646	-0.622274
1088	16,17-Dihydroxykauran-18-oic acid	2.6	level2			337.236	264.6	POS	C20H32O4				Terpenoids	萜类	Diterpenoids	Kaurane and Phyllocladane diterpenoids	MRBLTWPEPGRXQN-UHFFFAOYSA-N	1.47413e-05	3.45861e-05	2.42286e-05	2.45187e-05	0.000101928	8.01933e-05	8.46783e-05	8.89334e-05	1.45094	0.00182157	0.091771	3.62717	1.85884
1093	Hydroxytyrosol Acetate	2.6	level2			219.058	199.1	POS	C10H12O4	HMDB0253298			Shikimates and Phenylpropanoids	莽草酸及苯丙酸类	Phenylethanoids (C6-C2)	Phenylethanoids	FGJGLFPNIZXRLV-UHFFFAOYSA-N	5.08214e-05	8.77226e-05	6.13414e-05	6.66285e-05	0.000127191	9.38561e-05	0.000119517	0.000113521	1.28909	0.0346177	0.225414	1.7038	0.768752
1095	Ptelatoside_A	2.6	level2			415.158	183.1	POS	C19H26O10	HMDB0032600	90899-20-0		Shikimates and Phenylpropanoids	莽草酸及苯丙酸类	Phenylpropanoids (C6-C3)	Cinnamic acids and derivatives	DZMYOBBWRZTUTA-UHFFFAOYSA-N	1.5126e-05	7.07829e-06	1.16543e-05	1.12862e-05	3.83569e-06	4.14064e-06	1.98357e-06	3.31997e-06	1.37651	0.0303936	0.215784	0.294162	-1.76532
1096	Schizantherin E	2.6	level2			539.231	178.6	POS	C30H34O9				Shikimates and Phenylpropanoids	莽草酸及苯丙酸类	Lignans	Dibenzocyclooctadienes lignans	ZNXDFTKQSCEJGE-UHFFFAOYSA-N	6.52359e-05	3.83203e-05	7.37541e-05	5.91034e-05	2.56418e-05	2.46619e-05	1.12436e-05	2.05158e-05	1.32102	0.0295524	0.213073	0.347116	-1.52651
1099	Vicine	2.6	level2			305.112	154.8	POS	C10H16N4O7				Carbohydrates	碳水化合物			KGNGTSCIQCLKEH-SYCVNHKBSA-N	0.000103861	0.000102706	0.000108308	0.000104959	5.10499e-05	2.92691e-05	1.69293e-05	3.24161e-05	1.39256	0.00200501	0.0936565	0.308847	-1.69504
1115	Cycloart-25-ene-3,24-diol	2.59	level2			425.377	333	POS	C30H50O2				Terpenoids	萜类	Triterpenoids	Cycloartane triterpenoids	MHGLNDDJLDJDBG-UHFFFAOYSA-N	3.57377e-06	8.91259e-06	4.72816e-06	5.73818e-06	1.84602e-05	1.55787e-05	3.14813e-05	2.184e-05	1.38858	0.0353779	0.226967	3.8061	1.92831
1119	Dehydroandrographolide	2.59	level2			333.202	255.5	POS	C20H28O4				Terpenoids	萜类	Diterpenoids	Labdane diterpenoids	YIIRVUDGRKEWBV-FZOOCBFYSA-N	2.06956e-05	5.77902e-05	2.52129e-05	3.45663e-05	0.000101791	0.000100646	0.000176978	0.000126472	1.36746	0.0298584	0.214146	3.65882	1.87138
1122	[(3aS,4S,5S,6E,10E,11aR)-6-formyl-5-methoxy-10-methyl-3-methylidene-2-oxo-3a,4,5,8,9,11a-hexahydrocyclodeca[b]furan-4-yl] 2-methylpropanoate	2.59	level2			385.166	234.4	POS	C20H26O6				Terpenoids	萜类	Sesquiterpenoids	Germacrane sesquiterpenoids	SKCDPGIEMVQDCR-QZSWEDNISA-N	1.35747e-06	5.10125e-06	8.79657e-06	5.0851e-06	1.21666e-05	2.18145e-05	2.62009e-05	2.00607e-05	1.24279	0.0326557	0.221282	3.94499	1.98002
1131	alpha-santonin	2.59	level2			247.128	36.1	POS	C15H18O3				Terpenoids	萜类	Sesquiterpenoids	Eudesmane sesquiterpenoids	XJHDMGJURBVLLE-YWGZHDIYSA-N	5.38775e-05	6.47179e-05	2.88699e-05	4.91551e-05	0.000207619	0.000159626	0.000247348	0.000204864	1.45235	0.00479145	0.119205	4.16771	2.05926
1132	Atractylenolide I	2.59	level2			253.118	33.9	POS	C15H18O2				Terpenoids	萜类	Sesquiterpenoids	Eudesmane sesquiterpenoids	ZTVSGQPHMUYCRS-SWLSCSKDSA-N	7.73262e-06	1.74766e-05	9.79506e-06	1.16681e-05	3.2325e-05	3.19131e-05	4.7894e-05	3.73774e-05	1.41139	0.0130725	0.162398	3.20339	1.6796
1136	Novacine	2.58	level2			425.203	145.3	POS	C24H28N2O5				Alkaloids	生物碱	Tryptophan alkaloids	Aspidosperma-Iboga hybrid type (Vinca alkaloids)	POLBLONFVZXVPI-SVFVWZOVSA-N	2.1698e-06	2.61755e-06	1.68592e-06	2.15776e-06	1.04451e-06	7.15772e-07	7.67316e-07	8.42531e-07	1.46575	0.0102517	0.150407	0.390466	-1.35673
1140	2-[(2'R,8R,8aS)-2',4,4,7,8a-pentamethylspiro[2,3,4a,5-tetrahydro-1H-naphthalene-8,5'-oxolane]-2'-yl]acetic acid	2.58	level2			321.241	279.7	POS	C20H32O3				Terpenoids	萜类	Diterpenoids		XLWWERNKTLITEF-FOUFQHLJSA-N	5.3944e-05	0.000112796	7.87591e-05	8.1833e-05	0.000269365	0.000235153	0.000191362	0.00023196	1.42194	0.00606305	0.127938	2.83455	1.50312
1145	Benzene-1,2,4-triol	2.58	level2			125.024	166.7	NEG	C6H6O3				Shikimates and Phenylpropanoids	莽草酸及苯丙酸类			GGNQRNBDZQJCCN-UHFFFAOYSA-N	3.82457e-05	4.1811e-05	4.34822e-05	4.11797e-05	2.35713e-05	2.25632e-05	2.05207e-05	2.22184e-05	1.53172	0.00044564	0.0609327	0.539549	-0.890175
1149	Octabenzone	2.57	level2			327.198	261.2	POS	C21H26O3				Polyketides	聚酮	Phloroglucinols	Acyl phloroglucinols	QUAMTGJKVDWJEQ-UHFFFAOYSA-N	6.56125e-06	1.98932e-05	5.72324e-06	1.07259e-05	4.56275e-05	6.09015e-05	7.74834e-05	6.13375e-05	1.41226	0.00791112	0.138551	5.71864	2.51567
1152	aflatoxin G1	2.57	level2			329.069	157.1	POS	C17H12O7	HMDB0030474	1165-39-5	C16755	Polyketides	聚酮	Chromanes	Aflatoxins	XWIYFDMXXLINPU-UHFFFAOYSA-N	4.65629e-05	6.45339e-05	3.71669e-05	4.94212e-05	2.04013e-05	1.44655e-05	2.0741e-05	1.85359e-05	1.44425	0.0203184	0.187649	0.37506	-1.41481
1153	Obliquine	2.57	level2			449.202	141.4	POS	C26H28N2O5				Alkaloids	生物碱	Tyrosine alkaloids	Amarylidaceae alkaloids	MNZZTIOCKJEHEP-XVZHEKKHSA-N	7.23115e-06	1.24465e-05	9.51779e-06	9.7318e-06	4.46242e-06	2.94652e-06	3.62837e-06	3.6791e-06	1.44101	0.0182859	0.180427	0.37805	-1.40335
1158	Timosaponin A1	2.57	level2			579.387	310.1	POS	C33H54O8	HMDB0030046	14835-43-9	C08886	Terpenoids	萜类	Steroids	Spirostane steroids	ZNEIIZNXGCIAAL-UHFFFAOYSA-N	6.31072e-06	1.63357e-05	1.04078e-05	1.10181e-05	3.05988e-05	2.60335e-05	3.29222e-05	2.98515e-05	1.3714	0.00603121	0.127828	2.70932	1.43793
1167	picein	2.57	level2			297.098	154.5	NEG	C14H18O7								GOZCEKPKECLKNO-RKQHYHRCSA-N	4.57282e-05	6.44257e-05	4.68002e-05	5.2318e-05	2.64681e-05	2.59903e-05	1.2994e-05	2.18175e-05	1.3626	0.0152535	0.170906	0.417016	-1.26182
1169	Prexanthoperol	2.56	level2			315.192	272.5	POS	C20H26O3	HMDB0034712	119817-27-5		Terpenoids	萜类	Diterpenoids	Tetracyclic diterpenoids	KVTOPOITUALWOF-UHFFFAOYSA-N	4.01817e-05	8.82183e-05	2.78686e-05	5.20896e-05	0.000112299	0.00011009	0.000170079	0.000130823	1.251	0.0430354	0.237455	2.51149	1.32855
1171	Isolaureline	2.56	level2			310.146	175.6	POS	C19H19NO3				Alkaloids	生物碱	Tyrosine alkaloids	Aporphine alkaloids	GXFOBPWUVXXUIF-HNNXBMFYSA-N	6.13297e-06	9.36974e-06	1.0191e-05	8.56455e-06	3.8568e-06	4.98047e-06	2.69642e-06	3.84456e-06	1.34638	0.0282106	0.21018	0.448892	-1.15556
1172	Physovenine	2.56	level2			263.138	150.5	POS	C14H18N2O3				Alkaloids	生物碱	Tryptophan alkaloids	Pyrroloindole alkaloids	LXTKNVLLWOLCOV-JSGCOSHPSA-N	7.0756e-05	0.000120494	8.68182e-05	9.26894e-05	0.000223589	0.00021573	0.000352649	0.000263989	1.43248	0.0214933	0.191549	2.84811	1.51
1174	Cephaeline	2.56	level2			489.264	253.2	POS	C28H38N2O4	HMDB0249806			Alkaloids	生物碱	Tyrosine alkaloids	Isoquinoline alkaloids	DTGZHCFJNDAHEN-UHFFFAOYSA-N	1.35052e-06	4.47184e-07	9.96822e-07	9.31509e-07	1.87787e-06	2.54779e-06	3.94951e-06	2.79172e-06	1.2932	0.0488446	0.238106	2.99699	1.58351
1175	Vincristine	2.56	level2			823.402	234.4	NEG	C46H56N4O10	HMDB0014681	57-22-7	C07204	Alkaloids	生物碱	Tryptophan alkaloids	Aspidosperma type	OGWKCGZFUXNPDA-XQKSVPLYSA-N	4.88846e-05	0.000117488	6.50952e-05	7.71558e-05	0.000311316	0.000199071	0.000158221	0.000222869	1.3296	0.0440841	0.237455	2.88856	1.53035
1182	(2S)-4-hydroxy-2-(2-hydroxypropan-2-yl)-7-methyl-2,3-dihydrofuro[3,2-g]chromen-5-one	2.56	level2			277.104	35	POS	C15H16O5				Polyketides	聚酮	Chromanes	Chromones	LJSWMDKKEBOERP-LBPRGKRZSA-N	0.000525068	0.000459902	0.000518594	0.000501188	0.000191186	0.000172748	0.000162125	0.000175353	1.54385	0.000129868	0.0488946	0.349875	-1.51509
1183	Mycosinol	2.56	level2			215.072	21.9	POS	C13H10O3				Fatty acids	脂肪酸	Fatty acyls	Hydrocarbons	FZRGCIPZQGXDCM-IZZDOVSWSA-N	3.90783e-06	5.28917e-07	8.48908e-06	4.30861e-06	2.37158e-05	1.94625e-05	2.9958e-05	2.43787e-05	1.25991	0.00629384	0.129633	5.65815	2.50033
1184	Hematoxylin	2.56	level2			303.077	19.2	POS	C16H14O6				Shikimates and Phenylpropanoids	莽草酸及苯丙酸类			WZUVPPKBWHMQCE-XJKSGUPXSA-N	5.51761e-05	5.24535e-05	8.39261e-05	6.38519e-05	3.27305e-05	2.39629e-05	1.83523e-05	2.50152e-05	1.39991	0.0235403	0.197135	0.39177	-1.35192
1185	2-isopropylthioxanthen-9-one	2.56	level2			255.086	72.5	POS	C16H14OS		5495-84-1		Shikimates and Phenylpropanoids	莽草酸及苯丙酸类			KTALPKYXQZGAEG-UHFFFAOYSA-N	2.21948e-05	2.78089e-05	1.87156e-05	2.29064e-05	8.39345e-06	8.15443e-06	4.58931e-06	7.04573e-06	1.46338	0.00557826	0.124847	0.307588	-1.70093
1186	Morphine_3-glucuronide	2.55	level2			462.18	261.2	POS	C23H27NO9	HMDB0041936	20290-09-9	C16643	Alkaloids	生物碱	Tyrosine alkaloids	Isoquinoline alkaloids	WAEXKFONHRHFBZ-ZXDZBKESSA-N	1.50906e-05	2.93019e-05	2.01545e-05	2.15157e-05	6.51674e-05	4.0026e-05	4.18651e-05	4.90195e-05	1.3368	0.0390387	0.234454	2.27831	1.18797
1191	Chaulmoogric Acid	2.55	level2			298.273	265.2	POS	C18H32O2				Fatty acids	脂肪酸	Fatty Acids and Conjugates	Carbocyclic fatty acids	XMVQWNRDPAAMJB-UHFFFAOYSA-N	5.33968e-06	7.5903e-06	1.04855e-05	7.80515e-06	1.52532e-05	1.86574e-05	1.56492e-05	1.65199e-05	1.38289	0.00900475	0.144235	2.11654	1.08171
1199	Di-dihydrocaffeoyl spermidine	2.54	level2			474.265	273.8	POS	C25H35N3O6				Alkaloids	生物碱	Ornithine alkaloids	Polyamines	RNEHQZRKZJSYOL-UHFFFAOYSA-N	1.6866e-05	0.000270194	7.09068e-05	0.000119322	0.000665371	0.00097763	0.00137706	0.00100669	1.31369	0.0156631	0.172483	8.43671	3.07668
1201	2-Oxo-9-methylthiononanoic_acid	2.54	level2			219.107	18.6	POS	C10H18O3S				Fatty acids	脂肪酸	Fatty Acids and Conjugates	Oxo fatty acids	MJGXIOUQXYXGLP-UHFFFAOYSA-N	2.49844e-05	2.63941e-05	2.84617e-05	2.66134e-05	1.93877e-05	1.81002e-05	1.53609e-05	1.76163e-05	1.45532	0.00447219	0.116284	0.661932	-0.595245
1203	Ginsenoside Rg2	2.54	level2			783.48	332.3	NEG	C42H72O13	HMDB0035395	52286-74-5		Terpenoids	萜类	Triterpenoids	Dammarane and Protostane triterpenoids	AGBCLJAHARWNLA-UHFFFAOYSA-N	1.27234e-05	1.05596e-05	1.18433e-05	1.17088e-05	9.09594e-06	7.26243e-06	9.10306e-06	8.48714e-06	1.34072	0.0213501	0.19111	0.724854	-0.464238
1205	14-(hydroxymethyl)-5,9-dimethyltetracyclo[11.2.1.01,10.04,9]hexadecan-5-ol	2.54	level2			293.246	291.5	POS	C19H32O2				Terpenoids	萜类	Diterpenoids	Norkaurane diterpenoids	LZAZGDZVFQSCFO-UHFFFAOYSA-N	2.13594e-05	6.93743e-05	8.40539e-05	5.82625e-05	0.000199898	0.000119326	0.00021139	0.000176871	1.24913	0.0265888	0.206015	3.03576	1.60206
1206	Gigantol	2.54	level2			275.117	283.7	POS	C16H18O4				Shikimates and Phenylpropanoids	莽草酸及苯丙酸类	Stilbenoids	Monomeric stilbenes	SDXKZPQOVUDXIY-UHFFFAOYSA-N	6.56478e-05	4.93803e-05	4.74091e-05	5.41457e-05	2.13141e-05	2.01559e-05	2.14228e-05	2.09643e-05	1.51997	0.0285117	0.210654	0.387182	-1.36891
1215	Grayanotoxin_II	2.53	level2			353.229	234.8	POS	C20H32O5				Terpenoids	萜类	Diterpenoids	Grayanotoxane diterpenoids	KEOQZUCOGXIEQR-LXFHFZRZSA-N	1.86132e-05	4.67786e-05	3.04401e-05	3.1944e-05	0.000197719	0.000155385	0.000246925	0.00020001	1.48366	0.00371787	0.111827	6.26126	2.64645
1216	Gniditrin	2.53	level2			647.291	150.5	POS	C37H42O10				Terpenoids	萜类	Diterpenoids	Daphnane diterpenoids	NEIGQRKMHFDLTK-FLWUMMFCSA-N	1.18752e-06	1.17e-06	2.14426e-06	1.50059e-06	6.85906e-09	6.19632e-09	6.61583e-09	6.55707e-09	1.55065	0.0434135	0.237455	0.00436966	-7.83826
1220	Ginsenoside Rh2 (S-FORM)	2.53	level2			667.434	345.3	NEG	C36H62O8	HMDB0039544	78214-33-2		Terpenoids	萜类	Triterpenoids	Dammarane and Protostane triterpenoids	CKUVNOCSBYYHIS-UHFFFAOYSA-N	0.000213633	0.000152091	0.000229629	0.000198451	2.07361e-05	9.64452e-05	0.000128494	8.18919e-05	1.08126	0.0426834	0.237455	0.412656	-1.27699
1231	Dihydrolycorine	2.52	level2			290.136	246	POS	C16H19NO4				Alkaloids	生物碱	Tyrosine alkaloids	Amarylidaceae alkaloids	VJILFEGOWCJNIK-MGRBZGILSA-N	0.00020679	0.000234641	0.000180968	0.000207466	8.81455e-05	7.12346e-05	8.61847e-05	8.18549e-05	1.52304	0.00155883	0.0873281	0.394545	-1.34174
1235	Crenatine_A	2.52	level2			569.319	182.5	POS	C34H40N4O4				Alkaloids	生物碱	Peptide alkaloids	Ansa peptide alkaloids	NAMLDTWANUOXLT-GQIVPORTSA-N	6.0239e-06	7.97254e-06	6.97678e-06	6.99108e-06	2.34845e-06	3.25183e-06	2.1931e-06	2.5978e-06	1.49986	0.00253163	0.100643	0.371587	-1.42823
1240	(2S)-5-hydroxy-2-(3-hydroxy-4-methoxyphenyl)-4-oxo-3,4-dihydro-2H-chromen-7-yl 6-O-(6-deoxy-alpha-L-mannopyranosyl)-beta-D-glucopyranoside	2.52	level2			633.188	196.4	POS	C28H34O15				Shikimates and Phenylpropanoids	莽草酸及苯丙酸类	Flavonoids	Flavanones	QUQPHWDTPGMPEX-QJBIFVCTSA-N	3.33289e-05	3.63334e-05	1.64899e-05	2.87174e-05	9.90503e-06	1.06807e-05	1.57902e-06	7.38824e-06	1.20164	0.0353922	0.226981	0.257274	-1.95862
1244	GLUCURONOLACTONE	2.52	level2			175.025	170.5	NEG	C6H8O6				Carbohydrates	碳水化合物	Saccharides	Monosaccharides	UYUXSRADSPPKRZ-SKNVOMKLSA-N	0.0016997	0.00107464	0.00166877	0.00148104	0.000253366	0.000235528	0.000575791	0.000354895	1.42101	0.00825292	0.14083	0.239626	-2.06114
1245	CEDRELONE	2.52	level2			423.211	147.3	POS	C26H30O5				Terpenoids	萜类	Triterpenoids	Limonoids	OQMUOVSEPOBWMK-BWLMZZBKSA-N	0.000139375	0.000132558	0.000171836	0.000147923	1.89814e-05	4.45568e-05	1.15196e-05	2.50192e-05	1.44081	0.00144224	0.0848476	0.169137	-2.56374
1247	[(2R,3S,4S,5R,6R)-6-[(2S,3S,4S,5R)-3,4-dihydroxy-2,5-bis(hydroxymethyl)oxolan-2-yl]oxy-3,4,5-trihydroxyoxan-2-yl]methyl 4-hydroxybenzoate	2.52	level2			461.13	37.9	NEG	C19H26O13				Shikimates and Phenylpropanoids	莽草酸及苯丙酸类	Phenolic acids (C6-C1)	Simple phenolic acids	CDTIMEVVBBGLIF-OVUASUNJSA-N	9.96527e-06	3.09464e-05	3.2805e-05	2.45723e-05	0.000104246	8.00735e-05	7.369e-05	8.60032e-05	1.34414	0.00657148	0.131587	3.50001	1.80736
1260	Hexose + C13H21O2 (isomer of 1144)	2.51	level2			433.208	186.2	NEG	C19H32O8				Terpenoids	萜类	Apocarotenoids	Megastigmanes	SMBCGBWABYMHIN-UHFFFAOYSA-N	1.76162e-05	2.69395e-05	3.02922e-05	2.49493e-05	5.69377e-06	9.57708e-06	5.59147e-06	6.95411e-06	1.46004	0.0109507	0.153502	0.27873	-1.84306
1262	Acacetin Diacetate	2.51	level2			367.078	169.7	NEG	C20H16O7				Shikimates and Phenylpropanoids	莽草酸及苯丙酸类	Flavonoids	Flavones	VYHHSBHXZVSILO-UHFFFAOYSA-N	0.00468428	0.00346664	0.00479668	0.00431587	0.00145115	0.00129706	0.000999155	0.00124912	1.5095	0.0023444	0.0987472	0.289426	-1.78873
1270	(2E)-3-(Acetoxymethyl)-5-[(1R,4aR,8aS)-2,5,5,8a-tetramethyl-4-oxo-1,4,4a,5,6,7,8,8a-octahydro-1-naphthalenyl]-2-pentenoic acid	2.5	level2			377.231	231	POS	C22H32O5				Terpenoids	萜类	Diterpenoids	Labdane diterpenoids	UTRJNVUJZHUXNP-VQCNVNLLSA-N	1.72759e-06	5.63961e-07	1.21722e-06	1.16959e-06	3.39725e-06	2.69131e-06	3.10554e-06	3.0647e-06	1.32269	0.00859678	0.142235	2.62032	1.38974
1271	3a-Hydroxy-3,5a,9-trimethyl-3a,4,5,5a,6,7,8,9b-octahydronaphtho[1,2-b]furan-2(3H)-one	2.5	level2			251.163	205.1	POS	C15H22O3				Terpenoids	萜类	Sesquiterpenoids	Eudesmane sesquiterpenoids	JJTIUYSMVWORIT-UHFFFAOYSA-N	1.07245e-05	1.51419e-05	1.18687e-05	1.25784e-05	2.88082e-05	2.23869e-05	3.33103e-05	2.81685e-05	1.45322	0.010506	0.151271	2.23943	1.16313
1277	3,4,5-trimethoxycinnamic acid	2.5	level2			237.077	180.2	NEG	C12H14O5	HMDB0002511	90-50-6		Shikimates and Phenylpropanoids	莽草酸及苯丙酸类	Phenylpropanoids (C6-C3)	Cinnamic acids and derivatives	YTFVRYKNXDADBI-SNAWJCMRSA-N	3.34244e-05	2.87394e-05	2.69133e-05	2.96924e-05	1.93909e-05	1.95127e-05	1.51174e-05	1.8007e-05	1.4404	0.00844991	0.141351	0.606453	-0.721533
1286	Avenalumic_acid	2.49	level2			191.07	276.5	POS	C11H10O3	HMDB0040731	135754-92-6		Shikimates and Phenylpropanoids	莽草酸及苯丙酸类	Phenylpropanoids (C6-C3)	Cinnamic acids and derivatives	CYYTUYSFBHDJRH-ZPUQHVIOSA-N	3.95626e-05	8.31803e-05	6.44161e-05	6.23863e-05	0.000185518	0.000149707	0.000177105	0.000170777	1.42695	0.00285891	0.103946	2.73741	1.45281
1288	Sterebin_A	2.49	level2			311.221	238.5	POS	C18H30O4	HMDB0035337	107647-14-3		Terpenoids	萜类	Diterpenoids	Labdane diterpenoids	GUVJPXABQYFWPD-BQYQJAHWSA-N	6.04604e-05	0.000126488	7.67197e-05	8.78893e-05	0.00029491	0.000228698	0.000397587	0.000307065	1.43195	0.0144253	0.167855	3.49377	1.80478
1292	[(2R,3R,4S,5R,6R)-6-[2-(3,4-dihydroxyphenyl)ethoxy]-3,5-dihydroxy-4-[(2S,3R,4R,5R,6S)-3,4,5-trihydroxy-6-methyloxan-2-yl]oxyoxan-2-yl]methyl (E)-3-(4-hydroxy-3-methoxyphenyl)prop-2-enoate	2.49	level2			637.212	172.7	NEG	C30H38O15				Shikimates and Phenylpropanoids	莽草酸及苯丙酸类	Phenylpropanoids (C6-C3)	Cinnamic acids and derivatives	OFNCUIXPAFLTJZ-PYQKQGIYSA-N	7.20966e-06	5.2958e-06	4.93455e-06	5.81334e-06	2.26789e-06	2.17348e-06	1.11453e-06	1.85197e-06	1.43073	0.00764513	0.137229	0.318572	-1.65031
1307	Flossonol	2.47	level2			221.116	266.5	POS	C13H16O3				Polyketides	聚酮	Naphthalenes	Naphthalenones	UCEGSXPHVOXHBN-KCJUWKMLSA-N	4.69172e-05	6.11281e-05	7.32905e-05	6.04453e-05	9.55551e-05	8.0226e-05	9.90179e-05	9.15997e-05	1.29889	0.0311279	0.217731	1.51542	0.599713
1312	3-O-Methylniveusin_A	2.47	level2			409.182	148.1	POS	C21H28O8	HMDB0039084			Terpenoids	萜类	Sesquiterpenoids	Germacrane sesquiterpenoids	MEJPFLKDAHVOFR-OLIGCOFLSA-N	4.81895e-05	3.2847e-05	4.29115e-05	4.1316e-05	2.81955e-05	1.97251e-05	2.22873e-05	2.34026e-05	1.35777	0.0254209	0.202738	0.56643	-0.82003
1321	Chasmanine	2.46	level2			474.285	220.9	POS	C25H41NO6				Alkaloids	生物碱	Pseudoalkaloids	Terpenoid alkaloids	DBODJJZRZFZBBD-XXYWQWTJSA-N	1.52453e-06	1.65249e-06	2.25805e-06	1.81169e-06	4.00681e-06	4.84089e-06	4.43006e-06	4.42592e-06	1.49843	0.00138022	0.0843639	2.44297	1.28864
1329	(1aS,1bS,2S,5aR,6S,6aS)-6-({2,3-Di-O-acetyl-6-deoxy-4-O-[(2E)-3-(3-hydroxy-4-methoxyphenyl)-2-propenoyl]-alpha-L-mannopyranosyl}oxy)-1a-(hydroxymethyl)-1a,1b,2,5a,6,6a-hexahydrooxireno[4,5]cyclopenta[1,2-c]pyran-2-yl beta-D-glucopyranoside	2.46	level2			786.28	165.6	POS	C35H44O19				Terpenoids	萜类	Monoterpenoids	Iridoids monoterpenoids	FYTGEKJFCXSGKK-LHVPILOOSA-N	3.12228e-06	1.11755e-06	2.64184e-06	2.29389e-06	6.85906e-09	5.39145e-07	2.65149e-07	2.70384e-07	1.15325	0.0315182	0.218629	0.117872	-3.08471
1331	Flazine	2.46	level2			309.089	138.1	POS	C17H12N2O4	HMDB0033459	100041-05-2		Alkaloids	生物碱	Tryptophan alkaloids	Carboline alkaloids	USBWYUYKHHILLZ-UHFFFAOYSA-N	3.73273e-05	6.43009e-05	3.78553e-05	4.64945e-05	5.40523e-06	7.83493e-06	2.1427e-06	5.12762e-06	1.46786	0.0102768	0.15045	0.110284	-3.1807
1335	Salicifolioside_A	2.45	level2			627.229	220.4	POS	C29H38O15				Shikimates and Phenylpropanoids	莽草酸及苯丙酸类	Flavonoids	Chalcones	HIBKUVNPLDZFLK-FLGFWZHASA-N	2.70791e-05	1.47742e-05	1.62339e-05	1.93624e-05	5.54129e-06	6.51662e-06	2.94579e-06	5.00123e-06	1.42444	0.0234163	0.197004	0.258296	-1.9529
1337	7-(2-hydroxypropan-2-yl)-1,4a-dimethyl-2,3,4,5,6,7,8,8a-octahydronaphthalen-1-ol	2.45	level2			239.201	308.4	NEG	C15H28O2				Terpenoids	萜类	Sesquiterpenoids	Eudesmane sesquiterpenoids	LKKDASYGWYYFIK-UHFFFAOYSA-N	0.000684363	0.000991802	0.000808758	0.000828308	0.00318619	0.00244285	0.00296863	0.00286589	1.522	0.00102256	0.0787507	3.45993	1.79074
1339	Spiredine	2.45	level2			354.209	243.8	POS	C22H27NO3				Terpenoids	萜类	Diterpenoids	Atisane diterpenoids	SMCYLHSXVDDYCA-UXTSAHMASA-N	1.61664e-05	3.37672e-05	2.09064e-05	2.36133e-05	4.87374e-05	5.97421e-05	7.27339e-05	6.04045e-05	1.38526	0.0133981	0.163646	2.55807	1.35505
1347	Symplocosin	2.45	level2			538.227	179.1	POS	C26H32O11				Shikimates and Phenylpropanoids	莽草酸及苯丙酸类	Lignans	Furofuranoid lignans	QLJNETOQFQXTLI-UHFFFAOYSA-N	0.000276665	0.000188235	0.00031408	0.00025966	0.000101238	0.000102983	4.98187e-05	8.468e-05	1.39358	0.0131712	0.162856	0.326119	-1.61653
1349	ANILINE-2-SULFONIC ACID	2.45	level2			174.019	24.4	POS	C6H7N	HMDB0003012	62-53-3	C00292	Amino acids and Peptides	氨基酸及短肽	Small peptides	Aminoacids	PAYRUJLWNCNPSJ-UHFFFAOYSA-N	0.000228665	0.000257625	0.000273789	0.000253359	9.88418e-05	0.000175942	0.000151333	0.000142039	1.33963	0.0133246	0.163391	0.560622	-0.834901
1351	(3b,16b,20R)-Pregn-5-ene-3,16,20-triol_3-glucoside	2.44	level2			497.309	281.8	POS	C27H44O8	HMDB0041331	171828-53-8		Terpenoids	萜类	Steroids	Pregnane steroids	MMAFNNBLJJXUCU-UHFFFAOYSA-N	2.85889e-05	1.4128e-05	2.11007e-05	2.12725e-05	5.79325e-06	4.9631e-06	3.46828e-06	4.74154e-06	1.4702	0.0174285	0.177467	0.222895	-2.16556
1356	(1R,2R,3R,4S,5S,7R,8R,9R,10S,14R)-1,8,16-Triacetoxy-2-(glycoloyloxy)-7-hydroxy-5,9,12,12-tetramethyl-13-oxotetracyclo[7.6.1.0.3,7..0.10,14.]hexadec-4-yl benzoate	2.43	level2			655.274	263.2	POS	C35H44O13				Terpenoids	萜类	Diterpenoids	Segetane diterpenoids	XIZUZZXWYLTRAC-BSCNZNARSA-N	9.04169e-06	1.83737e-05	1.67365e-05	1.47173e-05	3.76169e-05	3.10459e-05	3.51421e-05	3.46016e-05	1.38684	0.00452771	0.117177	2.35109	1.23333
1358	Glaucolide A	2.43	level2			487.146	233.4	POS	C23H28O10				Terpenoids	萜类	Sesquiterpenoids	Germacrane sesquiterpenoids	DDRDDFBLSIAXPP-WMFJGPPASA-N	6.44153e-05	4.62284e-05	5.28571e-05	5.45003e-05	1.17638e-05	9.88408e-06	7.81086e-06	9.81957e-06	1.5323	0.00119363	0.0808327	0.180175	-2.47253
1359	Lethedioside_B	2.43	level2			653.205	218.8	POS	C30H36O16				Shikimates and Phenylpropanoids	莽草酸及苯丙酸类	Flavonoids	Flavones	YCCFHELFYKTGSO-IMWYKUOISA-N	1.49134e-05	1.36212e-05	1.208e-05	1.35382e-05	7.07803e-06	4.89878e-06	8.24359e-06	6.74013e-06	1.40842	0.00599707	0.127649	0.49786	-1.00619
1360	Lunarine	2.43	level2			438.233	216.7	POS	C25H31N3O4				Alkaloids	生物碱	Ornithine alkaloids	Polyamines	YIWJEBPTHXRHQF-LLMLIWGDSA-N	4.70167e-05	5.16538e-05	3.31154e-05	4.39286e-05	6.25413e-05	6.48906e-05	8.21711e-05	6.98677e-05	1.28141	0.035688	0.227678	1.59048	0.669463
1361	Geranylhydroquinone	2.43	level2			247.168	208.3	POS	C16H22O2				Terpenoids	萜类	Meroterpenoids	Merosesquiterpenoids	ZSCRTFONTNMQBL-NTUHNPAUSA-N	7.85212e-06	1.3976e-05	7.00367e-06	9.61058e-06	2.21438e-05	1.85852e-05	1.48848e-05	1.85379e-05	1.26164	0.0423576	0.237455	1.92891	0.947784
1362	Ergostane-3,6-dione	2.43	level2			415.356	332.4	POS	C28H46O2	HMDB0032004	88662-00-4		Terpenoids	萜类	Steroids	Cholestane steroids	VETZNBAGZJYCQT-UHFFFAOYSA-N	9.27449e-06	3.12876e-05	1.5671e-05	1.87443e-05	0.000129996	6.21064e-05	0.00012535	0.000105817	1.40635	0.0189347	0.182493	5.6453	2.49705
1372	6-Methoxydihydrosanguinarine	2.42	level2			364.111	224.9	POS	C21H17NO5				Alkaloids	生物碱	Tyrosine alkaloids	Isoquinoline alkaloids	ZXAGLUIVEUDJAR-UHFFFAOYSA-N	5.34932e-05	4.42581e-05	3.441e-05	4.40538e-05	1.91967e-05	1.44425e-05	9.83073e-06	1.449e-05	1.44488	0.00854199	0.141925	0.328916	-1.60421
1377	Kakkalide	2.42	level2			631.173	170.2	POS	C28H32O15				Shikimates and Phenylpropanoids	莽草酸及苯丙酸类	Isoflavonoids	Isoflavones	QTVAYNGFFDZGDR-WQTMBSJWSA-N	3.40365e-05	1.32149e-05	2.85352e-05	2.52622e-05	4.07399e-06	8.79588e-06	4.58666e-06	5.81884e-06	1.38029	0.0385942	0.233738	0.230338	-2.11818
1379	5,7-dihydroxy-2-[4-hydroxy-3-[(2S,3R,4S,5R)-3,4,5-trihydroxyoxan-2-yl]oxyphenyl]-3-methoxychromen-4-one	2.42	level2			471.082	41	POS	C21H20O11				Shikimates and Phenylpropanoids	莽草酸及苯丙酸类	Flavonoids	Flavonols	ASKKBGQVSVTIAW-HVQFUZGHSA-N	6.47937e-05	9.31049e-05	0.000143294	0.000100397	1.55272e-05	1.36945e-05	2.27627e-06	1.04993e-05	1.37754	0.0182348	0.1803	0.104578	-3.25735
1380	Resveratrol	2.42	level2			227.103	36.1	NEG	C14H12O3	HMDB0003747	501-36-0	C03582	Shikimates and Phenylpropanoids	莽草酸及苯丙酸类	Stilbenoids	Monomeric stilbenes	LUKBXSAWLPMMSZ-OWOJBTEDSA-N	6.49607e-06	1.78899e-05	1.91286e-05	1.45049e-05	4.83033e-05	3.41205e-05	5.56553e-05	4.60264e-05	1.33336	0.0136048	0.164629	3.17316	1.66592
1381	(3b,6b,8a,12a)-8,12-Epoxy-7(11)-eremophilene-6,8,12-trimethoxy-3-ol	2.41	level2			327.215	230.2	POS	C18H30O5	HMDB0031963			Terpenoids	萜类	Sesquiterpenoids	Eremophilane sesquiterpenoids	CLQUNRBWTPVVAG-UHFFFAOYSA-N	1.8413e-05	3.44239e-05	1.60164e-05	2.29511e-05	7.17493e-05	7.28303e-05	0.000100291	8.16235e-05	1.4419	0.0059146	0.126903	3.55641	1.83042
1384	6-pentadecyl_Salicylic_Acid	2.41	level2			349.272	292.4	POS	C22H36O3	HMDB0029683	16611-84-0	C10759	Polyketides	聚酮	Aromatic polyketides	Catechols with side chains	ADFWQBGTDJIESE-UHFFFAOYSA-N	6.09897e-05	0.000102102	7.3842e-05	7.8978e-05	0.000230642	0.000311364	0.000349933	0.000297313	1.49075	0.00420199	0.114375	3.76451	1.91246
1387	Eriojaposide_A	2.41	level2			503.248	241.6	POS	C24H38O11	HMDB0038028	290308-51-9		Terpenoids	萜类	Apocarotenoids	Megastigmanes	FFYPJOJFUJFYAT-AATRIKPKSA-N	5.66424e-05	2.35918e-05	4.37938e-05	4.13426e-05	9.20571e-06	1.63984e-05	9.59172e-06	1.17319e-05	1.38027	0.0402849	0.236536	0.283773	-1.81719
1389	(-)-11-Hydroxy-9,15,16-trioxooctadecanoic_acid	2.41	level2			343.21	212.3	POS	C18H30O6	HMDB0038940	38076-39-0		Fatty acids	脂肪酸	Octadecanoids	Other Octadecanoids	DRPDZKNSZVIOQR-UHFFFAOYSA-N	4.00868e-06	5.95245e-06	5.15429e-06	5.03847e-06	2.39199e-05	2.1912e-05	1.91678e-05	2.16666e-05	1.53049	0.000365368	0.0572324	4.30022	2.10441
1396	Gluconapin	2.4	level2			374.062	198.8	POS	C11H19NO9S2				Amino acids and Peptides	氨基酸及短肽	Amino acid glycosides	Glucosinolates	PLYQBXHVYUJNQB-KPKJPENVSA-N	0.000342278	0.000233621	0.000344869	0.000306923	0.000138383	0.000154435	9.40425e-05	0.000128953	1.41617	0.0121098	0.158923	0.420149	-1.25103
1402	2-[4-(3-Hydroxypropyl)-2-methoxyphenoxy]-1,3-propanediol_1-glucoside	2.39	level2			419.193	265.2	POS	C19H30O10	HMDB0040353	68340-35-2		Shikimates and Phenylpropanoids	莽草酸及苯丙酸类	Lignans	Arylnaphthalene and aryltetralin lignans	LRRKTNFBBSNZEN-UHFFFAOYSA-N	3.20137e-05	2.27358e-05	3.66251e-05	3.04582e-05	5.01968e-06	5.79721e-06	5.25913e-06	5.35867e-06	1.531	0.0251626	0.201804	0.175935	-2.50688
1407	Acutumine	2.39	level2			398.137	199	POS	C19H24ClNO6				Alkaloids	生物碱	Tyrosine alkaloids	Acutumine alkaloids	FSXRARBVZZKCGJ-FMAJMWNWSA-N	2.26959e-05	5.12354e-05	2.84345e-05	3.41219e-05	0.000117592	8.84346e-05	0.000148413	0.000118147	1.41974	0.0123085	0.159576	3.46249	1.79181
1408	ABOA	2.39	level2			178.049	153.4	POS	C9H7NO3	HMDB0040612	70735-79-4		Alkaloids	生物碱			FZAQRVWPQCXSPC-UHFFFAOYSA-N	4.56687e-05	0.000108086	5.42398e-05	6.93316e-05	0.000243615	0.000134232	0.000259887	0.000212578	1.34193	0.0312643	0.217989	3.06611	1.61641
1409	(1S,4aS,7aR)-7-methyl-1-[(2S,3R,4S,5S,6R)-3,4,5-trihydroxy-6-(hydroxymethyl)oxan-2-yl]oxy-4a-[(2S,3R,4R,5R,6S)-3,4,5-trihydroxy-6-methyloxan-2-yl]oxy-1,7a-dihydrocyclopenta[c]pyran-5-one	2.39	level2			508.203	141.9	POS	C21H30O13				Terpenoids	萜类	Monoterpenoids	Iridoids monoterpenoids	WDMQLCVSWBENIY-QZTRPTDZSA-N	6.31551e-06	6.76353e-06	6.1721e-06	6.41705e-06	4.46384e-06	1.53177e-06	1.09192e-06	2.36251e-06	1.26556	0.0194692	0.184632	0.368161	-1.44159
1415	geniposidic acid	2.38	level2			373.119	223.6	NEG	C16H22O10				Terpenoids	萜类	Monoterpenoids	Iridoids monoterpenoids	ZJDOESGVOWAULF-OGJQONSISA-N	6.97254e-05	3.51072e-05	0.000104077	6.96364e-05	1.43372e-05	6.98987e-07	1.17111e-05	8.91575e-06	1.20082	0.0405464	0.236961	0.128033	-2.96541
1421	Rhodoxanthin	2.37	level2			562.38	308.9	POS	C40H50O2				Terpenoids	萜类	Carotenoids (C40)	Carotenoids (C40, ε-ε)	VWXMLZQUDPCJPL-ZDHAIZATSA-N	8.25408e-06	2.02751e-05	1.1184e-05	1.32377e-05	4.60814e-05	3.55034e-05	3.75287e-05	3.97045e-05	1.40163	0.00551531	0.124624	2.99934	1.58465
1423	beta-Hydroxymyristic_acid	2.37	level2			243.196	294	NEG	C14H28O3				Fatty acids	脂肪酸	Fatty Acids and Conjugates	Hydroxy fatty acids	ATRNZOYKSNPPBF-UHFFFAOYSA-N	1.56247e-05	6.17841e-05	4.21942e-05	3.98677e-05	0.000208624	0.000170599	0.000291475	0.000223566	1.40618	0.00852106	0.1418	5.60771	2.48741
1425	[1-(3,5-dihydroxyphenyl)-12-hydroxytridecan-2-yl] acetate	2.37	level2			365.233	260.8	NEG	C21H34O5								XPDBYTRMUWQPTF-UHFFFAOYSA-N	1.04307e-05	2.16493e-05	1.37415e-05	1.52738e-05	3.08794e-05	2.72364e-05	3.69706e-05	3.16955e-05	1.33064	0.0198814	0.186162	2.07515	1.05321
1428	methyl (1S,4aR,7aR)-4a-hydroxy-7-(hydroxymethyl)-1-[(2S,3R,4S,5S,6R)-3,4,5-trihydroxy-6-(hydroxymethyl)oxan-2-yl]oxy-5,7a-dihydro-1H-cyclopenta[c]pyran-4-carboxylate	2.37	level2			449.135	213.6	NEG	C17H24O11				Terpenoids	萜类	Monoterpenoids	Iridoids monoterpenoids	LDBMLOLBWUOZGG-DOFVRBEMSA-N	0.00029939	0.000135297	0.000302384	0.00024569	4.29679e-05	2.54895e-05	6.6756e-06	2.50443e-05	1.39251	0.0171484	0.17666	0.101935	-3.29428
1432	Emodin	2.37	level2			288.086	169	POS	C15H10O5	HMDB0035214	518-82-1	C10343	Polyketides	聚酮	Polycyclic aromatic polyketides	Anthraquinones and anthrones	RHMXXJGYXNZAPX-UHFFFAOYSA-N	8.62282e-05	8.00411e-05	9.18313e-05	8.60335e-05	2.51668e-05	5.7236e-05	2.74539e-05	3.66189e-05	1.35842	0.0104708	0.151195	0.425635	-1.23231
1436	2-Acetamido-3-hydroxypropanoic acid	2.37	level2			148.06	36.7	POS	C5H9NO4				Amino acids and Peptides	氨基酸及短肽	Small peptides	Dipeptides	JJIHLJJYMXLCOY-UHFFFAOYSA-N	0.000714746	0.000798553	0.000576074	0.000696457	0.000532751	0.000452251	0.00038319	0.000456064	1.32306	0.0367886	0.230127	0.654834	-0.610799
1439	Desacetylvindoline	2.36	level2			413.21	298.2	NEG	C23H30N2O5				Alkaloids	生物碱	Tryptophan alkaloids	Aspidosperma type	ZDKMPOJNYNVYLA-PEGGBQQISA-N	3.24394e-05	2.06395e-05	3.09088e-05	2.79959e-05	7.39848e-05	4.33975e-05	6.04949e-05	5.92924e-05	1.36622	0.0310229	0.217497	2.1179	1.08263
1440	9-HODE	2.36	level2			297.241	288.3	POS	C18H32O3	HMDB0004670	73543-67-6	C14767	Fatty acids	脂肪酸	Octadecanoids	Other Octadecanoids	NPDSHTNEKLQQIJ-UINYOVNOSA-N	0.000367902	0.000540803	0.0001568	0.000355168	0.000846819	0.000620921	0.000694383	0.000720708	1.13151	0.047633	0.237455	2.0292	1.02091
1445	4-[5-(4-hydroxy-3-methoxyphenyl)-3,4-dimethyloxolan-2-yl]-2-methoxyphenol [IIN-based on	2.36	level2			706.364	207.8	POS	C20H24O5	HMDB0034179	74683-16-2		Shikimates and Phenylpropanoids	莽草酸及苯丙酸类	Lignans	Furanoid lignans	GMXMKSFJQLFOSO-UHFFFAOYSA-N	1.42307e-07	1.68429e-07	2.57812e-07	1.89516e-07	5.9135e-06	4.95473e-06	7.73057e-06	6.1996e-06	1.54771	0.017705	0.178501	32.7128	5.03178
1449	4-hydroxy-9-(4-hydroxy-3,5-dimethoxyphenyl)-5a,6,8a,9-tetrahydro-5H-[2]benzofuro[5,6-f][1,3]benzodioxol-8-one [IIN-based on	2.36	level2			418.149	187.2	POS	C21H20O8				Shikimates and Phenylpropanoids	莽草酸及苯丙酸类	Lignans	Arylnaphthalene and aryltetralin lignans	JGGWNGRBXJWAOC-UHFFFAOYSA-N	3.6169e-05	4.69034e-05	2.28594e-05	3.53106e-05	9.69505e-07	3.09205e-06	5.32187e-06	3.12781e-06	1.43992	0.0103852	0.150851	0.0885798	-3.49688
1457	Furanofukinin	2.35	level2			249.184	242.1	POS	C16H24O2	HMDB0036640	34335-93-8		Terpenoids	萜类	Sesquiterpenoids	Eremophilane sesquiterpenoids	JRLLKNNCOWNIBL-UHFFFAOYSA-N	1.01801e-05	1.8657e-05	1.21289e-05	1.36553e-05	2.88836e-05	3.23954e-05	4.38193e-05	3.50327e-05	1.41246	0.0145911	0.168336	2.5655	1.35924
1461	Acteoside	2.35	level2			625.212	180.4	POS	C29H36O15				Shikimates and Phenylpropanoids	莽草酸及苯丙酸类	Phenylpropanoids (C6-C3)	Cinnamic acids and derivatives	FBSKJMQYURKNSU-ZLSOWSIRSA-N	8.21556e-06	1.1905e-05	1.3639e-05	1.12532e-05	1.43164e-06	8.35857e-07	1.10325e-06	1.12358e-06	1.52726	0.0229601	0.196171	0.0998458	-3.32415
1469	Isoflavone base + 2O, O-MalonylHex	2.34	level2			503.12	233	POS	C24H22O12	HMDB0041263	124590-31-4	C16191	Shikimates and Phenylpropanoids	莽草酸及苯丙酸类	Isoflavonoids	Isoflavones	MTXMHWSVSZKYBT-UHFFFAOYSA-N	4.59211e-05	2.48246e-05	3.43768e-05	3.50408e-05	8.22596e-06	7.33946e-06	1.54883e-06	5.70475e-06	1.35886	0.0104228	0.150919	0.162803	-2.6188
1470	(-)-Nopol	2.34	level2			167.143	226.9	POS	C11H18O	HMDB0030002	35836-73-8		Terpenoids	萜类	Monoterpenoids	Pinane monoterpenoids	ROKSAUSPJGWCSM-UHFFFAOYSA-N	4.3234e-06	1.06097e-05	5.80757e-06	6.91354e-06	1.97877e-05	1.65024e-05	1.82108e-05	1.81669e-05	1.37507	0.00606414	0.127938	2.62773	1.39382
1471	Zizyphine_F	2.34	level2			598.356	220.3	POS	C32H47N5O6				Alkaloids	生物碱	Peptide alkaloids	Ansa peptide alkaloids	BRUITOXHBSVJME-IIMYRAIISA-N	5.44078e-09	5.69788e-09	6.14832e-09	5.76233e-09	6.85906e-09	6.19632e-09	6.61583e-09	6.55707e-09	1.27832	0.048516	0.237455	1.13792	0.1864
1480	HYDROXYCITRIC_ACID	2.34	level2			207.016	25.9	NEG	C6H8O8	HMDB0031159	27750-10-3		Fatty acids	脂肪酸	Fatty Acids and Conjugates	Hydroxy fatty acids	ZMJBYMUCKBYSCP-UHFFFAOYSA-N	9.05318e-05	0.00022953	0.000185623	0.000168562	0.000359443	0.000468915	0.00043725	0.00042187	1.33443	0.00840843	0.141211	2.50276	1.32352
1481	[(1aS,1bS,2S,5aR,6S,6aS)-1a-(hydroxymethyl)-2-[(2S,3R,4S,5S,6R)-3,4,5-trihydroxy-6-(hydroxymethyl)oxan-2-yl]oxy-2,5a,6,6a-tetrahydro-1bH-oxireno[5,6]cyclopenta[1,3-c]pyran-6-yl] (E)-3-(4-hydroxy-3-methoxyphenyl)prop-2-enoate	2.34	level2			537.167	25.1	NEG	C25H30O13				Terpenoids	萜类	Monoterpenoids	Iridoids monoterpenoids	RMSKZOXJAHOIER-GGKKSNITSA-N	0.000227373	0.000161294	0.000119982	0.000169549	3.10825e-05	5.9441e-05	3.61909e-05	4.22381e-05	1.45968	0.0172336	0.176812	0.24912	-2.00509
1487	11S-HOME(12E)	2.33	level2			299.257	294.9	POS	C18H34O3				Fatty acids	脂肪酸	Octadecanoids	Other Octadecanoids	ONAMALXVRDKFRJ-WKOYGUFESA-N	2.80553e-05	7.48029e-05	5.37959e-05	5.2218e-05	0.000132201	0.000128681	0.000122868	0.000127917	1.3346	0.00536401	0.123354	2.44967	1.29259
1488	strychnine_N-oxide	2.33	level2			349.156	256.7	NEG	C21H22N2O3								ADTDBAKUQAKBGZ-VXJIXCKJSA-N	3.82035e-05	5.9049e-05	5.24342e-05	4.98956e-05	8.34166e-05	7.28388e-05	6.60165e-05	7.40906e-05	1.26006	0.0384926	0.233731	1.48491	0.570379
1492	Scropolioside D	2.33	level2			767.24	166.4	NEG	C34H42O17				Terpenoids	萜类	Monoterpenoids	Iridoids monoterpenoids	XTDOKCBBQODVJW-LTDPXCIYSA-N	1.16159e-05	1.04573e-05	7.25728e-06	9.77683e-06	1.62942e-06	1.45644e-06	1.37203e-07	1.07435e-06	1.32896	0.00328491	0.108273	0.109888	-3.1859
1494	Daucosterol	2.32	level2			599.43	357.8	POS	C35H60O6				Terpenoids	萜类	Steroids	Stigmastane steroids	NPJICTMALKLTFW-OFUAXYCQSA-N	1.03288e-05	2.11413e-05	1.56545e-05	1.57082e-05	3.18509e-05	3.18598e-05	2.27349e-05	2.88152e-05	1.24221	0.0396253	0.235198	1.8344	0.87531
1499	catalposide	2.32	level2			481.139	235.7	NEG	C22H26O12				Terpenoids	萜类	Monoterpenoids	Iridoids monoterpenoids	UXSACQOOWZMGSE-RWORTQBESA-N	3.17933e-05	2.97398e-05	2.64884e-05	2.93405e-05	4.99221e-06	3.01159e-06	2.8007e-06	3.6015e-06	1.5329	0.000109593	0.0482853	0.122748	-3.02622
1500	Tremulacin	2.32	level2			527.149	214.7	NEG	C27H28O11				Shikimates and Phenylpropanoids	莽草酸及苯丙酸类	Phenolic acids (C6-C1)	Simple phenolic acids	RCKCYCDBDYUIGM-LFMHJWGUSA-N	3.23136e-05	2.3559e-05	1.51813e-05	2.36847e-05	7.16642e-06	4.99761e-06	3.54774e-06	5.23726e-06	1.45166	0.0218065	0.192664	0.221125	-2.17707
1504	Corynoline	2.32	level2			368.154	166.3	POS	C21H21NO5				Alkaloids	生物碱	Tyrosine alkaloids	Isoquinoline alkaloids	IQUGPRHKZNCHGC-TYPHKJRUSA-N	0.000698041	0.00100687	0.00051436	0.000739756	0.000115266	0.000240784	0.000150848	0.000168966	1.46038	0.0183894	0.180599	0.228408	-2.13032
1508	2H-Cyclohepta[b]furan-2-one, 4-acetyl-6-[1-(beta-D-glucopyranosyloxy)-1-methylethyl]octahydro-8a-(hydroxymethyl)-, (3aS,4R,6R,8aR)-	2.31	level2			447.222	217.9	POS	C21H34O10				Terpenoids	萜类	Sesquiterpenoids	Guaiane sesquiterpenoids	HIJTUHQXWSDVSN-IBYSJJMLSA-N	1.66617e-05	1.11248e-05	1.50225e-05	1.42697e-05	4.27006e-06	2.96749e-06	1.93628e-06	3.05794e-06	1.47769	0.00321682	0.107289	0.214297	-2.22232
1515	Norsanguinine	2.31	level2			260.125	247.3	POS	C15H17NO3				Alkaloids	生物碱	Tyrosine alkaloids	Amarylidaceae alkaloids	UAJBMQOTHJIJOI-WBIUFABUSA-N	8.54684e-05	4.5109e-05	5.48346e-05	6.1804e-05	3.42855e-06	8.04329e-06	8.56378e-06	6.67854e-06	1.48742	0.0431987	0.237455	0.10806	-3.21009
1517	1-[4-hydroxy-3-(3-methylbut-2-enyl)phenyl]ethanone	2.31	level2			205.121	228.2	POS	C13H16O2	HMDB0030770	26932-05-8	C10702	Shikimates and Phenylpropanoids	莽草酸及苯丙酸类			QJAPFSSVKIZTMR-UHFFFAOYSA-N	3.04129e-06	8.86754e-06	5.67699e-06	5.86194e-06	1.62435e-05	1.55841e-05	2.60878e-05	1.93051e-05	1.3566	0.0238909	0.197977	3.2933	1.71953
1524	GAMBOGIC ACID	2.31	level2			629.313	164.7	POS	C38H44O8				Shikimates and Phenylpropanoids	莽草酸及苯丙酸类	Xanthones	Plant xanthones	GEZHEQNLKAOMCA-RRZNCOCZSA-N	7.65348e-06	7.41489e-06	7.37363e-06	7.48067e-06	4.26825e-06	2.65753e-06	3.06677e-06	3.33085e-06	1.47101	0.00107509	0.0791802	0.445261	-1.16728
1526	Annoglabasin_C	2.31	level2			407.243	152.4	POS	C23H34O6	HMDB0036263	288627-09-8		Terpenoids	萜类	Diterpenoids	Kaurane and Phyllocladane diterpenoids	USYOOQFISINJLZ-UHFFFAOYSA-N	4.59501e-06	3.47414e-06	2.5049e-06	3.52468e-06	7.11923e-07	1.29847e-06	6.64165e-07	8.91521e-07	1.45549	0.014481	0.167949	0.252937	-1.98315
1530	Pristimerin	2.3	level2			463.283	325.6	NEG	C30H40O4				Terpenoids	萜类	Triterpenoids	Friedelane triterpenoids	JFACETXYABVHFD-WXPPGMDDSA-N	0.000146574	0.000104815	0.000132991	0.000128127	0.000379424	0.000231751	0.000266341	0.000292505	1.43395	0.023721	0.197469	2.28294	1.19089
1532	methyl palmitoleate	2.3	level2			267.233	318.5	NEG	C17H32O2				Fatty acids	脂肪酸	Fatty esters	Wax monoesters	IZFGRAGOVZCUFB-HJWRWDBZSA-N	0.000439736	0.000789603	0.000432612	0.000553984	0.00160503	0.0011376	0.0016959	0.00147951	1.40818	0.0114886	0.156454	2.67067	1.4172
1535	Bufotenine_O-glucoside	2.3	level2			367.187	226.9	POS	C18H26N2O6	HMDB0029564	64656-15-1		Alkaloids	生物碱	Tryptophan alkaloids	Simple indole alkaloids	GNUFCIHWKPAEBF-UHFFFAOYSA-N	1.0009e-05	1.9854e-05	1.1534e-05	1.3799e-05	2.94628e-05	2.39379e-05	2.7305e-05	2.69019e-05	1.32036	0.0192461	0.1841	1.94956	0.963146
1537	Phellodensin_F	2.3	level2			503.19	181.3	POS	C26H30O10				Shikimates and Phenylpropanoids	莽草酸及苯丙酸类	Flavonoids	Flavanones	BMYUIXRQCPBGKG-SKSDNVLZSA-N	9.47088e-05	7.86478e-05	0.000155078	0.000109478	4.22516e-05	4.84583e-05	2.27122e-05	3.78074e-05	1.34513	0.0431452	0.237455	0.345341	-1.53391
1546	Isosyringinoside	2.29	level2			535.195	207.1	POS	C23H34O14	HMDB0040814	152686-85-6						RYVGCUJETSKZDU-ARJAWSKDSA-N	2.27565e-05	3.21339e-05	4.24719e-05	3.24541e-05	8.96354e-06	7.0619e-06	1.16915e-05	9.23896e-06	1.4523	0.0165606	0.175226	0.284678	-1.8126
1547	(3-Hydroxy-2-oxo-2,3-dihydro-1H-indol-3-yl)acetic acid	2.29	level2			208.06	146	POS	C10H9NO4				Alkaloids	生物碱	Tryptophan alkaloids	Simple oxindole alkaloids	MHLHEINWUCSPTL-UHFFFAOYSA-N	0.000726857	0.00040468	0.000969509	0.000700349	0.000135165	0.00022392	0.000160234	0.000173106	1.42092	0.0334795	0.223148	0.247171	-2.01642
1548	Erysenegalensein J	2.29	level2			437.155	145.2	POS	C25H24O7				Shikimates and Phenylpropanoids	莽草酸及苯丙酸类	Isoflavonoids	Coumaronochromones	DQNIDSLDXGTEPL-UHFFFAOYSA-N	2.49096e-05	3.8576e-05	3.18631e-05	3.17829e-05	2.20291e-05	1.19904e-05	8.7985e-06	1.42727e-05	1.28177	0.035455	0.227135	0.449067	-1.155
1552	Tetrahydrocoptisine	2.29	level2			346.1	248.7	POS	C19H17NO4				Alkaloids	生物碱	Tyrosine alkaloids	Isoquinoline alkaloids	UXYJCYXWJGAKQY-OAHLLOKOSA-N	1.91361e-05	2.56473e-05	1.70507e-05	2.06114e-05	5.52699e-05	4.54377e-05	7.91979e-05	5.99685e-05	1.45197	0.0190835	0.183503	2.90949	1.54076
1555	Carvyl_acetate	2.29	level2			195.137	233.8	POS	C12H18O2	HMDB0038046	97-42-7		Terpenoids	萜类	Monoterpenoids	Monocyclic monoterpenoids	YTHRBOFHFYZBRJ-UHFFFAOYSA-N	8.06279e-05	0.000235855	0.000122767	0.000146417	0.000623387	0.000510831	0.000682692	0.000605637	1.42721	0.0025719	0.101366	4.13639	2.04837
1556	(+|-)-Myrtenyl_acetate	2.29	level2			195.137	213.5	POS	C12H18O2	HMDB0035126			Terpenoids	萜类	Monoterpenoids	Pinane monoterpenoids	BKATZVAUANSCKN-UHFFFAOYSA-N	1.98237e-05	2.50993e-05	2.50276e-05	2.33169e-05	3.23132e-05	2.88399e-05	3.82452e-05	3.31328e-05	1.31354	0.0393073	0.234875	1.42098	0.506884
1565	Irisresorcinol	2.28	level2			347.293	307.7	POS	C23H38O2	HMDB0038532	52483-21-3		Polyketides	聚酮	Aromatic polyketides	Catechols with side chains	VBBLHZOJAWSCSP-BQYQJAHWSA-N	3.9063e-06	8.81589e-06	5.99171e-06	6.23797e-06	1.73217e-05	1.2721e-05	2.62164e-05	1.8753e-05	1.35512	0.0409971	0.237455	3.00627	1.58797
1569	Dihydrosamidin	2.28	level2			406.19	266.2	POS	C21H24O7				Shikimates and Phenylpropanoids	莽草酸及苯丙酸类	Coumarins	Simple coumarins	ALKTVPFKDYZFGA-UHFFFAOYSA-N	0.000150453	9.37679e-05	0.000108271	0.000117497	2.96732e-05	3.19498e-05	3.43727e-05	3.19986e-05	1.51632	0.0366053	0.22985	0.272334	-1.87655
1570	quercetin-3-O-deoxyhexosyl(1-2)deoxyhexoside	2.28	level2			403.13	233.8	NEG	C17H24O11				Terpenoids	萜类	Monoterpenoids	Secoiridoid monoterpenoids	MQLSOVRLZHTATK-PEYNGXJCSA-N	0.000377209	0.000278693	0.000290382	0.000315428	3.83896e-05	3.40964e-05	2.15416e-05	3.13425e-05	1.53534	0.000835408	0.0742268	0.0993651	-3.33112
1573	Episyringaresinol 4'-O-beta-D-glncopyranoside	2.28	level2			603.207	199	POS	C28H36O13				Shikimates and Phenylpropanoids	莽草酸及苯丙酸类	Lignans	Furofuranoid lignans	WEKCEGQSIIQPAQ-QVYKXMJQSA-N	1.12549e-05	1.04457e-05	1.1883e-05	1.11945e-05	5.58689e-07	1.05297e-07	5.76424e-07	4.1347e-07	1.47826	1.70165e-05	0.0301289	0.036935	-4.75887
1579	Diosmin	2.28	level2			626.21	164.6	POS	C28H32O15	HMDB0029548	520-27-4	C10039	Shikimates and Phenylpropanoids	莽草酸及苯丙酸类	Flavonoids	Flavones	GZSOSUNBTXMUFQ-UHFFFAOYSA-N	1.39091e-06	1.49326e-06	6.85041e-07	1.18974e-06	1.38395e-07	4.86924e-07	1.05103e-07	2.43474e-07	1.34603	0.0283875	0.210499	0.204645	-2.2888
1581	6-(Furan-3-yl)-13-hydroxy-5,12,16,16-tetramethyl-7,10,17-trioxahexacyclo[13.3.3.01,15.02,12.05,11.09,11]henicos-19-ene-8,14,21-trione	2.28	level2			467.087	33.2	POS	C26H28O8				Terpenoids	萜类	Triterpenoids	Limonoids	IUXAGRKMQRVAMG-UHFFFAOYSA-N	9.63939e-06	1.15928e-05	1.17359e-05	1.09894e-05	7.69318e-06	7.02383e-06	1.98452e-06	5.56718e-06	1.07562	0.0479484	0.237455	0.506596	-0.981091
1588	Diterpenoid_EF-D	2.27	level2			475.269	259.9	POS	C27H38O7				Terpenoids	萜类	Diterpenoids	Tetracyclic diterpenoids	QOSLYAARSBMQOF-NBJLYKDOSA-N	1.12606e-06	3.05978e-05	6.72995e-06	1.28179e-05	6.728e-05	0.000120171	0.000168612	0.000118688	1.27844	0.0258885	0.204101	9.25949	3.21093
1589	Carboline metabolite (C26H26N2O8)	2.27	level2			495.175	259.2	POS	C26H26N2O8				Alkaloids	生物碱	Tryptophan alkaloids	Corynanthe type	QBVLOMJKKLVAPJ-UHFFFAOYSA-N	8.64114e-05	7.18461e-05	6.84923e-05	7.55833e-05	4.34268e-05	3.68242e-05	2.57939e-05	3.53483e-05	1.43061	0.00591274	0.126903	0.467673	-1.09643
1590	Fraxin	2.27	level2			371.09	234.4	POS	C16H18O10				Shikimates and Phenylpropanoids	莽草酸及苯丙酸类	Coumarins	Simple coumarins	CRSFLLTWRCYNNX-QBNNUVSCSA-N	1.75349e-06	1.18033e-05	2.56443e-06	5.37374e-06	6.95172e-05	7.51853e-05	4.52845e-05	6.3329e-05	1.42139	0.003972	0.112677	11.7849	3.55887
1593	2-methoxy-5-methyl-3-(2-methylbut-3-en-2-yl)chromen-4-one	2.27	level2			281.114	186.6	POS	C16H18O3				Polyketides	聚酮			WAPMVTHIMHEOAB-UHFFFAOYSA-N	1.09651e-05	5.35043e-06	9.14275e-06	8.48608e-06	1.0888e-06	1.06113e-06	3.64107e-06	1.93033e-06	1.34405	0.0244265	0.199662	0.227471	-2.13625
1594	6-methoxy-7-[3,4,5-trihydroxy-6-[(3,4,5-trihydroxy-6-methyloxan-2-yl)oxymethyl]oxan-2-yl]oxychromen-2-one	2.27	level2			501.159	184	POS	C22H28O13				Shikimates and Phenylpropanoids	莽草酸及苯丙酸类	Coumarins	Simple coumarins	FCIZPHNZRNLUJD-UHFFFAOYSA-N	2.89811e-05	1.71353e-05	2.02258e-05	2.2114e-05	6.79149e-06	9.86858e-06	5.5437e-06	7.40126e-06	1.4396	0.0175512	0.177809	0.334686	-1.57912
1602	Schisandrin A	2.27	level2			417.233	150.1	POS	C24H32O6				Shikimates and Phenylpropanoids	莽草酸及苯丙酸类	Lignans	Dibenzocyclooctadienes lignans	JEJFTTRHGBKKEI-OKILXGFUSA-N	1.81844e-05	1.37738e-05	1.18665e-05	1.46082e-05	7.26401e-06	5.1399e-06	5.97678e-06	6.1269e-06	1.45952	0.0125995	0.160854	0.419414	-1.25355
1603	Albine	2.27	level2			233.164	142.7	POS	C14H20N2O				Alkaloids	生物碱	Lysine alkaloids	Quinolizidine alkaloids	QJVOZXGJOGJKPT-FMKGYKFTSA-N	7.06874e-05	4.38086e-05	4.39196e-05	5.28052e-05	2.99768e-06	5.82445e-06	2.29644e-06	3.70619e-06	1.51872	0.0300748	0.214896	0.0701861	-3.83267
1604	Pomiferin	2.27	level2			419.25	46.9	POS	C25H24O6	HMDB0256696		C10519	Shikimates and Phenylpropanoids	莽草酸及苯丙酸类	Isoflavonoids	Isoflavones	GHCZYXUOYFOXIP-UHFFFAOYSA-N	1.72871e-06	1.13862e-06	1.33462e-06	1.40065e-06	5.62901e-07	4.03258e-07	7.41264e-07	5.69141e-07	1.40295	0.0139577	0.165779	0.406341	-1.29924
1608	[3,4,5-trihydroxy-6-[(3,4,5-trihydroxyoxan-2-yl)oxymethyl]oxan-2-yl] 2,6,6-trimethylcyclohexene-1-carboxylate	2.26	level2			480.244	155	POS	C21H34O11				Terpenoids	萜类	Monoterpenoids	Secoiridoid monoterpenoids	JGMROMZJBQKIDK-UHFFFAOYSA-N	0.000443105	0.000248255	0.000283917	0.000325092	1.13027e-05	1.14734e-05	2.24518e-05	1.5076e-05	1.52888	0.0349304	0.225796	0.0463744	-4.43053
1609	Anomurine	2.26	level2			344.182	140.2	POS	C20H25NO4	HMDB0030270	78478-27-0		Alkaloids	生物碱	Tyrosine alkaloids	Isoquinoline alkaloids	CMQSBRRTRZPLHE-UHFFFAOYSA-N	2.46673e-06	6.88113e-06	8.10047e-06	5.81611e-06	1.52971e-05	1.2774e-05	2.28109e-05	1.69607e-05	1.27703	0.0324307	0.220848	2.91615	1.54407
1614	PGF1alpha	2.26	level2			379.246	260.6	POS	C20H36O5	HMDB0002685	745-62-0	C06475	Fatty acids	脂肪酸	Eicosanoids	Prostaglandins	DZUXGQBLFALXCR-CDIPTNKSSA-N	1.15585e-05	1.62833e-05	1.108e-05	1.29739e-05	3.76484e-06	3.3292e-06	3.6285e-06	3.57418e-06	1.53014	0.0291884	0.212454	0.275489	-1.85993
1616	Annuionone_B	2.26	level2			223.132	228.9	POS	C13H18O3	HMDB0032121	211183-73-2		Terpenoids	萜类	Apocarotenoids	Apocarotenoids (β-)	LYMNQFZEIGCRGT-SNAWJCMRSA-N	7.48064e-06	2.17215e-05	1.89578e-05	1.60533e-05	3.99033e-05	3.62069e-05	7.10404e-05	4.90502e-05	1.29197	0.0498978	0.240479	3.05546	1.61139
1629	7,11b-dihydro-6H-indeno[2,1-c]chromene-3,4,6a,9,10-pentol	2.26	level2			320.112	171.4	POS	C16H14O6	HMDB0242211			Shikimates and Phenylpropanoids	莽草酸及苯丙酸类			WZUVPPKBWHMQCE-UHFFFAOYSA-N	0.000219659	0.000138643	0.000182247	0.000180183	3.38955e-05	3.16366e-05	2.23607e-05	2.92976e-05	1.5244	0.0212463	0.190785	0.162599	-2.62061
1630	Mulberroside A	2.26	level2			591.163	165.2	POS	C26H32O14				Shikimates and Phenylpropanoids	莽草酸及苯丙酸类	Stilbenoids	Monomeric stilbenes	HPSWAEGGWLOOKT-VUNDNAJOSA-N	3.28867e-07	5.69788e-09	6.14832e-09	1.13571e-07	5.47272e-07	9.2285e-07	7.55556e-07	7.41893e-07	1.2281	0.0147517	0.168824	6.53241	2.70762
1633	Kanzonol_V	2.26	level2			377.174	41.2	POS	C24H24O4	HMDB0029788	184584-65-4		Shikimates and Phenylpropanoids	莽草酸及苯丙酸类	Isoflavonoids	2-arylbenzofurans	AKOSXIFOBUWPLU-UHFFFAOYSA-N	1.81482e-07	6.54592e-07	3.42739e-07	3.92938e-07	1.53731e-06	2.39142e-06	1.86958e-06	1.93277e-06	1.40877	0.00566202	0.125312	4.91876	2.2983
1634	ANISOCOUMARIN H	2.26	level2			332.181	37.3	POS	C19H22O4				Shikimates and Phenylpropanoids	莽草酸及苯丙酸类	Coumarins	Simple coumarins	VNADFOGBKXRWGC-RIYZIHGNSA-N	2.93024e-06	3.20295e-05	1.83547e-05	1.77715e-05	5.41379e-05	3.8165e-05	5.69752e-05	4.97594e-05	1.07697	0.0354312	0.227073	2.79996	1.4854
1635	Dimethyl_2-galloylgalactarate	2.26	level2			391.089	35.3	POS	C15H18O12	HMDB0036935			Shikimates and Phenylpropanoids	莽草酸及苯丙酸类	Phenolic acids (C6-C1)	Simple phenolic acids	FUZPULBJXZQHRK-UHFFFAOYSA-N	1.69059e-05	1.02319e-05	1.42364e-05	1.37914e-05	7.93783e-06	4.25749e-06	2.12172e-06	4.77235e-06	1.27797	0.0249337	0.201043	0.346038	-1.531
1638	Genistein	2.26	level2			305.022	19.8	NEG	C15H10O5	HMDB0003217	446-72-0	C06563	Shikimates and Phenylpropanoids	莽草酸及苯丙酸类	Isoflavonoids	Isoflavones	TZBJGXHYKVUXJN-UHFFFAOYSA-N	5.48618e-06	1.09977e-05	8.23515e-06	8.23967e-06	7.67728e-05	4.70478e-05	7.86158e-05	6.74788e-05	1.51193	0.026198	0.204887	8.1895	3.03378
1644	Amasterol	2.25	level2			413.34	338.3	POS	C28H44O2	HMDB0030054	85643-78-3		Terpenoids	萜类	Steroids	Ergostane steroids	VRCVXRWYXYWACO-UHFFFAOYSA-N	1.39879e-06	9.68483e-06	5.26112e-06	5.44825e-06	3.04116e-05	2.05309e-05	3.02932e-05	2.70786e-05	1.31577	0.00595257	0.127332	4.97014	2.31329
1646	5,7-dihydroxy-2-(4-hydroxyphenyl)-6-[(2S,3R,4R,5S,6R)-3,4,5-trihydroxy-6-(hydroxymethyl)oxan-2-yl]-8-[(2S,3R,4R,5R,6S)-3,4,5-trihydroxy-6-methyloxan-2-yl]chromen-4-one	2.25	level2			577.159	280	NEG	C27H30O14	HMDB0302837		C10196	Shikimates and Phenylpropanoids	莽草酸及苯丙酸类	Flavonoids	Flavones	MVOUGOXRXQDXDC-RSPRXDBDSA-N	4.53596e-06	1.41869e-05	4.88059e-06	7.86782e-06	2.5603e-05	3.61148e-05	2.90949e-05	3.02709e-05	1.37332	0.00714408	0.136175	3.84743	1.9439
1647	Epicalyxin_J	2.25	level2			687.263	269.8	POS	C42H38O9				Shikimates and Phenylpropanoids	莽草酸及苯丙酸类	Flavonoids	Flavanones	VIDHFKRYBXNWLN-OMQYIVAFSA-N	3.28768e-05	2.28582e-05	3.12074e-05	2.89808e-05	2.00206e-05	1.24117e-05	8.60305e-06	1.36785e-05	1.28634	0.0285752	0.210717	0.471983	-1.08319
1651	DIBOA + O-Hex	2.25	level2			342.084	199.8	NEG	C14H17NO9	HMDB0033734	155835-54-4						OUSLYTBGQGKTME-UHFFFAOYSA-N	2.22769e-05	2.235e-05	1.89476e-05	2.11915e-05	1.58698e-05	9.76231e-06	1.20719e-05	1.2568e-05	1.3573	0.0148836	0.169426	0.593069	-0.753729
1654	5-O-Methylvisamminol	2.25	level2			291.122	193.1	POS	C16H18O5				Polyketides	聚酮	Chromanes	Chromones	DGFLRNOCLJGHLY-ZDUSSCGKSA-N	3.34241e-06	2.59654e-06	6.28302e-06	4.07399e-06	1.08756e-05	1.06168e-05	9.00019e-06	1.01642e-05	1.37571	0.00865561	0.142437	2.4949	1.31898
1659	Purpuritenin_A	2.25	level2			293.116	155.3	POS	C19H16O3				Shikimates and Phenylpropanoids	莽草酸及苯丙酸类	Flavonoids	Chalcones	JAZVSCKRKREELH-VQHVLOKHSA-N	0.000164012	0.000176072	0.000214523	0.000184869	8.99836e-05	8.37851e-05	5.927e-05	7.76796e-05	1.47001	0.00389883	0.112629	0.420186	-1.2509
1661	Miconioside_A	2.24	level2			609.21	246.7	POS	C29H36O14				Shikimates and Phenylpropanoids	莽草酸及苯丙酸类	Flavonoids	Flavanones	CUEAVYXDEUPPTP-QSOMNBQZSA-N	1.86154e-05	1.62487e-05	1.95246e-05	1.81295e-05	1.15254e-05	8.83987e-06	5.12209e-06	8.4958e-06	1.33164	0.0100855	0.14932	0.468616	-1.09352
1664	jaeschkeanadiol	2.24	level2			237.186	297.8	NEG	C15H26O2				Terpenoids	萜类	Sesquiterpenoids	Daucane sesquiterpenoids	SUAPQGLGNKUSLY-LJISPDSOSA-N	6.4704e-05	0.00012032	0.000110473	9.84989e-05	0.000205838	0.000139748	0.000176135	0.000173907	1.24315	0.0424809	0.237455	1.76557	0.820137
1666	Zanthodioline	2.24	level2			306.135	246.6	POS	C16H19NO5	HMDB0031929	198336-59-3		Alkaloids	生物碱	Tryptophan alkaloids	Quinoline alkaloids	GQGXEILPTLCMFO-UHFFFAOYSA-N	2.2188e-05	3.09897e-05	4.01992e-05	3.11256e-05	5.81677e-05	5.57609e-05	4.30958e-05	5.23415e-05	1.26411	0.0386213	0.233738	1.68162	0.749851
1672	[(2R,3S,4S,5R,6S)-3,4,5-trihydroxy-6-(4-hydroxyphenoxy)oxan-2-yl]methyl_4-hydroxybenzoate	2.24	level2			410.144	185.1	POS	C19H20O9				Shikimates and Phenylpropanoids	莽草酸及苯丙酸类	Phenolic acids (C6-C1)	Simple phenolic acids	FTFZXPBVBBJTHV-OGJJZOIMSA-N	1.76639e-05	2.28876e-05	2.13164e-05	2.06226e-05	1.60629e-05	1.47919e-05	1.28688e-05	1.45745e-05	1.34841	0.0285252	0.210669	0.706726	-0.500777
1676	2,4-Dihydroxypyrimidine-5-Carboxylic_Acid	2.24	level2			157.014	169.7	NEG	C5H4N2O4				Alkaloids	生物碱			ZXYAAVBXHKCJJB-UHFFFAOYSA-N	6.59166e-05	3.97155e-05	6.23481e-05	5.59934e-05	3.05026e-05	8.88335e-06	7.06296e-06	1.5483e-05	1.29977	0.0219981	0.193087	0.276514	-1.85458
1678	Genistin	2.24	level2			431.095	146	NEG	C21H20O10	HMDB0033988	529-59-9		Shikimates and Phenylpropanoids	莽草酸及苯丙酸类	Isoflavonoids	Isoflavones	ZCOLJUOHXJRHDI-UHFFFAOYSA-N	0.000449472	0.000667062	0.000617097	0.000577877	8.65546e-05	0.000164521	0.000119052	0.000123376	1.50151	0.00283753	0.103843	0.213498	-2.2277
1683	3_,5_,15_-O-triacetoxy-7_-14_-O-dibenzoyloxymyrsinol	2.23	level2			723.279	237.8	POS	C40H44O11				Terpenoids	萜类	Diterpenoids	Myrsinane diterpenoids	FEESWVAHLOUZGM-LDFAREHWSA-N	1.45209e-05	7.25049e-06	1.30455e-05	1.16056e-05	6.85906e-09	6.19632e-09	6.61583e-09	6.55707e-09	1.55293	0.0346999	0.225648	0.00056499	-10.7895
1686	20-Hydroxyecdysone 2,3:20,22-diacetonide	2.23	level2			561.377	308.9	POS	C33H52O7				Terpenoids	萜类	Steroids	Ecdysteroids	WXFMGCVRGSIXOB-APTIWFLNSA-N	2.27661e-05	5.71592e-05	3.23022e-05	3.74092e-05	0.000121928	9.71247e-05	0.000108229	0.000109094	1.39588	0.00459526	0.117465	2.91623	1.5441
1690	N1,N5,N10-Tricaffeoyl_spermidine	2.23	level2			632.258	260.6	POS	C34H37N3O9				Alkaloids	生物碱	Ornithine alkaloids	Polyamines	ZKNHGZHOGBDPIA-ZOWBABNGSA-N	4.48919e-07	5.85793e-07	7.09244e-07	5.81319e-07	3.0722e-07	1.82101e-07	6.61583e-09	1.65312e-07	1.01926	0.0224844	0.194701	0.284375	-1.81414
1691	Cyclobrassinin	2.23	level2			235.035	256.7	POS	C11H10N2S2	HMDB0033352	105748-58-1		Alkaloids	生物碱	Tryptophan alkaloids	Corynanthe type	MVMVWNMQGBYIDM-UHFFFAOYSA-N	0.000286585	0.000261982	0.00039356	0.000314042	2.69156e-05	4.74801e-05	6.19448e-05	4.54468e-05	1.49692	0.00297512	0.104921	0.144716	-2.78871
1693	(2S,3R,4S,5S,6R)-2-[4-[(3S,3aR,6S,6aR)-6-[3,5-dimethoxy-4-[(2S,3R,4S,5S,6R)-3,4,5-trihydroxy-6-(hydroxymethyl)oxan-2-yl]oxyphenyl]-1,3,3a,4,6,6a-hexahydrofuro[3,4-c]furan-3-yl]-2,6-dimethoxyphenoxy]-6-(hydroxymethyl)oxane-3,4,5-triol	2.23	level2			760.303	236.1	POS	C34H46O18				Shikimates and Phenylpropanoids	莽草酸及苯丙酸类	Lignans	Furofuranoid lignans	FFDULTAFAQRACT-XKBSQSBASA-N	5.44078e-09	5.69788e-09	6.14832e-09	5.76233e-09	7.75113e-07	1.21377e-06	8.85955e-07	9.58281e-07	1.55402	0.0185838	0.181293	166.301	7.37765
1696	gomisin C	2.23	level2			559.192	216.9	POS	C30H32O9				Shikimates and Phenylpropanoids	莽草酸及苯丙酸类	Lignans	Dibenzocyclooctadienes lignans	UFCGDBKFOKKVAC-HYSLPFRTSA-N	0.00015852	0.000146762	0.000109327	0.000138203	6.60582e-05	6.71338e-05	3.94197e-05	5.75372e-05	1.41909	0.00972828	0.147618	0.416324	-1.26422
1701	Xanthorhamnin	2.23	level2			769.219	170.9	NEG	C34H42O20				Shikimates and Phenylpropanoids	莽草酸及苯丙酸类	Flavonoids	Flavonols	NMGVHLDIHNFGQB-OTCPXFHUSA-N	1.13478e-06	1.496e-06	1.5497e-06	1.39349e-06	9.34553e-09	7.85109e-09	8.77191e-09	8.65618e-09	1.55491	0.00873413	0.142826	0.00621185	-7.33076
1709	Dipropyl_sulfide	2.23	level2			119.089	25.9	POS	C6H14S	HMDB0031431	111-47-7		Fatty acids	脂肪酸	Fatty acyls	Hydrocarbons	ZERULLAPCVRMCO-UHFFFAOYSA-N	3.89032e-05	3.61244e-05	4.7077e-05	4.07016e-05	8.6524e-05	9.60398e-05	0.000117533	0.000100032	1.50959	0.00367661	0.111732	2.4577	1.29731
1718	Gingerglycolipid_A	2.22	level2			677.371	273.8	POS	C33H56O14	HMDB0041093	145937-22-0		Fatty acids	脂肪酸	Glycerolipids	Glycosylmonoacylglycerols	MPSGDHOYFIUPSO-PDBXOOCHSA-N	2.28888e-06	5.98149e-07	1.87068e-06	1.5859e-06	2.75382e-07	6.19632e-09	6.61583e-09	9.60647e-08	1.30302	0.0447507	0.237455	0.0605741	-4.04515
1723	Lucuminic_acid	2.22	level2			447.154	229.7	POS	C19H26O12	HMDB0035007	190323-48-9						DUZCTLMSDUOYAW-UHFFFAOYSA-N	7.98865e-05	6.10002e-05	9.36028e-05	7.81632e-05	7.42712e-06	6.18016e-06	6.20395e-06	6.60374e-06	1.54417	0.0168511	0.175917	0.0844867	-3.56513
1731	NOSCAPINE	2.22	level2			436.136	183.4	POS	C22H23NO7	HMDB0033439	128-62-1	C09592	Alkaloids	生物碱	Tyrosine alkaloids	Isoquinoline alkaloids	AKNNEGZIBPJZJG-MSOLQXFVSA-N	6.79229e-06	5.13289e-06	6.11866e-06	6.01461e-06	2.99709e-06	3.94692e-06	1.31668e-06	2.75356e-06	1.23391	0.0228895	0.195969	0.457812	-1.12717
1734	Kuwanon C	2.22	level2			421.165	156.8	NEG	C25H26O6	HMDB0029507	62949-79-5		Shikimates and Phenylpropanoids	莽草酸及苯丙酸类	Flavonoids	Flavones	UWQYBLOHTQWSQD-UHFFFAOYSA-N	0.000553994	0.000556784	0.000667882	0.000592887	0.000241056	0.000207033	0.000164687	0.000204259	1.51367	0.000870186	0.0752804	0.344516	-1.53736
1735	Debromoaplysiatoxin	2.22	level2			593.335	154.5	POS	C32H48O10				Polyketides	聚酮	Macrolides	Aplysiatoxins	REAZZDPREXHWNV-BUNNSNHRSA-N	7.13065e-07	2.08219e-06	2.13873e-06	1.64466e-06	3.19946e-06	4.58505e-06	4.083e-06	3.95584e-06	1.23264	0.0200688	0.186688	2.40526	1.26619
1737	Quebrachitol	2.22	level2			233.042	24.6	POS	C7H14O6				Carbohydrates	碳水化合物	Polyols	Cyclitols	DSCFFEYYQKSRSV-UHFFFAOYSA-N	3.75202e-05	5.81637e-05	7.11553e-05	5.56131e-05	2.97233e-05	2.47904e-05	1.40994e-05	2.2871e-05	1.30459	0.0389772	0.23439	0.411253	-1.2819
1738	Digitalinum verum	2.21	level2			713.377	226.3	POS	C41H64O13	HMDB0251273			Terpenoids	萜类	Steroids	Cardenolides	WDJUZGPOPHTGOT-UHFFFAOYSA-N	4.24325e-07	1.53256e-06	5.76254e-07	8.44379e-07	6.78468e-06	6.86887e-06	9.17551e-06	7.60969e-06	1.46895	0.00139052	0.0845699	9.01218	3.17188
1739	[(2R,3S,4R,5R,6R)-6-[2-(3,4-dihydroxyphenyl)ethoxy]-4,5-dihydroxy-2-[[(2S,3R,4S,5R)-3,4,5-trihydroxyoxan-2-yl]oxymethyl]oxan-3-yl] (E)-3-(3,4-dihydroxyphenyl)prop-2-enoate	2.21	level2			628.222	36.5	POS	C28H34O15				Shikimates and Phenylpropanoids	莽草酸及苯丙酸类	Phenylpropanoids (C6-C3)	Cinnamic acids and derivatives	GNDDBOHLMOANGU-TYGLCWKWSA-N	5.44078e-09	1.06874e-06	5.00077e-07	5.24753e-07	7.14978e-06	8.10914e-06	4.96646e-06	6.74179e-06	1.1763	0.00315387	0.106678	12.8476	3.68342
1746	Osmanthuside_A	2.21	level2			447.163	239.7	POS	C23H26O9	HMDB0038748	97457-19-7		Shikimates and Phenylpropanoids	莽草酸及苯丙酸类	Phenylpropanoids (C6-C3)	Cinnamic acids and derivatives	TXIKDCCKEBXQGU-BJMVGYQFSA-N	7.6969e-06	9.28227e-06	7.66428e-06	8.21449e-06	1.83738e-06	2.02842e-06	5.42119e-06	3.09566e-06	1.30936	0.0161718	0.174052	0.376854	-1.40792
1749	Kikkanol_A	2.21	level2			255.195	233.7	POS	C15H26O3				Terpenoids	萜类	Sesquiterpenoids	Eudesmane sesquiterpenoids	NFDGWGXWJZESMB-QRTUWBSPSA-N	2.2225e-05	3.40382e-05	5.34114e-05	3.65582e-05	9.60622e-05	8.09676e-05	0.000102278	9.31025e-05	1.38463	0.00695695	0.134546	2.54669	1.34862
1753	Cycloveratrylene	2.21	level2			449.203	188.5	NEG	C27H30O6								YECHEDVCXXVLIY-UHFFFAOYSA-N	7.87283e-06	1.27361e-05	9.46467e-06	1.00245e-05	6.67145e-06	2.23802e-06	3.21021e-06	4.03989e-06	1.27054	0.0381636	0.233101	0.403001	-1.31114
1754	HDMBOA + O-Hex	2.21	level2			432.115	182.3	NEG	C16H21NO10	HMDB0037265	113565-33-6						UOASSFRPBORTCT-UHFFFAOYSA-N	0.000830165	0.00092269	0.00109759	0.000950148	0.000541815	0.000686476	0.000421961	0.000550084	1.34896	0.0217196	0.192465	0.578946	-0.788499
1756	2-[[7-hydroxy-1-(4-hydroxy-3,5-dimethoxyphenyl)-3-(hydroxymethyl)-6,8-dimethoxy-1,2,3,4-tetrahydronaphthalen-2-yl]methoxy]-6-(hydroxymethyl)oxane-3,4,5-triol	2.21	level2			627.227	156.3	NEG	C28H38O13	HMDB0038922	87585-32-8		Shikimates and Phenylpropanoids	莽草酸及苯丙酸类	Lignans	Arylnaphthalene and aryltetralin lignans	PQQRNPDHSJDAGV-UHFFFAOYSA-N	1.53417e-05	8.01488e-06	1.47122e-05	1.26896e-05	3.09705e-06	2.93981e-06	6.8156e-06	4.28416e-06	1.31723	0.0343676	0.224742	0.337612	-1.56656
1758	Speciosine	2.2	level2			478.229	145.8	POS	C28H31NO6				Alkaloids	生物碱	Tyrosine alkaloids	Phenethylisoquinoline alkaloids	SOFSXTKPGSIDCI-UHFFFAOYSA-N	1.02372e-05	1.35705e-05	1.0154e-05	1.13206e-05	5.55481e-06	3.69731e-06	2.4265e-06	3.89288e-06	1.41777	0.00680833	0.133391	0.343875	-1.54004
1761	[(2R,3R,4R,5R,6R)-6-[2-(3,4-dihydroxyphenyl)ethoxy]-5-hydroxy-4-[(2S,3R,4R,5R,6S)-3,4,5-trihydroxy-6-methyloxan-2-yl]oxy-2-[[(2S,3R,4S,5S)-3,4,5-trihydroxyoxan-2-yl]oxymethyl]oxan-3-yl]_(E)-3-(3,4-dihydroxyphenyl)prop-2-enoate	2.2	level2			774.284	228.1	POS	C34H44O19				Shikimates and Phenylpropanoids	莽草酸及苯丙酸类	Phenylpropanoids (C6-C3)	Cinnamic acids and derivatives	XPLMUADTACCMDJ-LVDCRSFESA-N	9.33311e-06	7.48458e-06	8.26481e-06	8.36083e-06	3.85895e-06	1.41486e-06	2.68754e-06	2.65378e-06	1.39058	0.0029898	0.105094	0.317407	-1.6556
1775	Deoxyloganic acid (Not validated)	2.19	level2			359.135	137.3	NEG	C16H24O9	HMDB0037028	92842-56-3	C11647	Terpenoids	萜类	Monoterpenoids	Iridoids monoterpenoids	DSXFHNSGLYXPNG-UHFFFAOYSA-N	0.000209111	0.000233392	0.000161339	0.000201281	2.12289e-05	3.576e-05	1.51066e-05	2.40318e-05	1.51594	0.00129625	0.0833225	0.119395	-3.06619
1780	Physalin_P	2.18	level2			527.195	227.7	POS	C28H30O10	HMDB0039639	149204-27-3		Terpenoids	萜类	Steroids	Ergostane steroids	WKKNNSSKEXVLKY-UHFFFAOYSA-N	6.53879e-05	5.79574e-05	5.57037e-05	5.9683e-05	4.69068e-05	3.50002e-05	2.27576e-05	3.48882e-05	1.25096	0.0305149	0.216197	0.584559	-0.77458
1785	Celogentin C	2.17	level2			514.286	177.2	POS	C50H70N14O10				Amino acids and Peptides	氨基酸及短肽	Oligopeptides	Cyclic peptides	ZIUCJBZUJCNMSJ-WYHXJWKRSA-N	1.70516e-06	1.53198e-06	1.47082e-06	1.56932e-06	3.34374e-07	6.19632e-09	3.86921e-07	2.42497e-07	1.11223	0.000658903	0.0697148	0.154524	-2.6941
1786	methyl (1S,4aS,7aS)-5'-oxo-1-[(2S,3R,4S,5S,6R)-3,4,5-trihydroxy-6-(hydroxymethyl)oxan-2-yl]oxy-4'-[(1S)-1-[(E)-3-[4-[(2S,3R,4S,5S,6R)-3,4,5-trihydroxy-6-(hydroxymethyl)oxan-2-yl]oxyphenyl]prop-2-enoyl]oxyethyl]spiro[4a,7a-dihydro-1H-cyclopenta[c]pyran-7,2'-furan]-4-carboxylate	2.17	level2			777.217	199.4	NEG	C36H42O19				Terpenoids	萜类	Monoterpenoids	Iridoids monoterpenoids	AFYIWKNGSIYXCQ-WLJLAZGQSA-N	0.000156384	0.000104909	0.00010659	0.000122628	2.64622e-05	5.98461e-05	1.44649e-05	3.3591e-05	1.3443	0.014739	0.168824	0.273927	-1.86814
1788	4-[4-(1,3-benzodioxol-5-yl)-2,3-dimethylbutyl]-2-methoxyphenol	2.17	level2			346.197	148.8	POS	C20H24O4	HMDB0036459	107534-93-0		Shikimates and Phenylpropanoids	莽草酸及苯丙酸类	Lignans	Dibenzylbutane lignans	QDDILOVMGWUNGD-UHFFFAOYSA-N	1.18028e-05	4.03847e-05	2.30471e-05	2.50782e-05	6.69841e-05	5.98075e-05	0.000101078	7.59565e-05	1.30403	0.0286674	0.211005	3.02879	1.59874
1789	1,3,5-Trihydroxy-10-methylacridone	2.17	level2			258.073	33.3	POS	C14H11NO4	HMDB0041468			Alkaloids	生物碱	Anthranilic acid alkaloids	Acridone alkaloids	SGESJKUDNYVWMW-UHFFFAOYSA-N	8.66721e-05	0.000113357	0.000101571	0.000100533	3.60236e-05	3.28371e-05	1.36582e-05	2.75063e-05	1.41712	0.00217563	0.0961042	0.273604	-1.86984
1791	5-[3,4,5-trihydroxy-6-(hydroxymethyl)oxan-2-yl]oxy-9-(3,4,5-trimethoxyphenyl)-5a,6,8a,9-tetrahydro-5H-[2]benzofuro[6,5-f][1,3]benzodioxol-8-one	2.16	level2			594.222	247.5	POS	C28H32O13	HMDB0256663			Shikimates and Phenylpropanoids	莽草酸及苯丙酸类	Lignans	Arylnaphthalene and aryltetralin lignans	NXVJTGLCCSFGAT-UHFFFAOYSA-N	0.000647811	0.000351031	0.000411172	0.000470005	3.62371e-05	2.66329e-05	2.19213e-05	2.82638e-05	1.53473	0.0393111	0.234875	0.060135	-4.05565
1794	Cis-Zeatin-riboside-O-glucoside	2.16	level2			514.217	229.5	POS	C21H31N5O10				Alkaloids	生物碱	Pseudoalkaloids	Purine alkaloids	MVMBTNNVZQRZQT-BPDSZQNASA-N	2.92614e-05	3.90331e-05	3.58719e-05	3.47221e-05	0.000144837	9.39153e-05	0.000104178	0.00011431	1.50625	0.00731707	0.136682	3.29214	1.71903
1799	Amoricin	2.16	level2			505.254	155.3	POS	C31H36O6				Shikimates and Phenylpropanoids	莽草酸及苯丙酸类	Flavonoids	Flavanones	CCWDHZOFIHNBIR-UHFFFAOYSA-N	0.000176223	8.7145e-05	0.000127571	0.000130313	1.30401e-05	1.62126e-05	2.00639e-05	1.64389e-05	1.51335	0.0467326	0.237455	0.126149	-2.9868
1803	Mulberrofuran_C	2.15	level2			581.175	224.7	POS	C34H28O9				Shikimates and Phenylpropanoids	莽草酸及苯丙酸类	Stilbenoids	Oligomeric stibenes	WTGKDESIYCVAOP-UNTHUGQZSA-N	4.78967e-06	1.52523e-06	3.68068e-06	3.33186e-06	6.60702e-07	6.19632e-09	8.43923e-07	5.03607e-07	1.03495	0.0462819	0.237455	0.151149	-2.72596
1809	Bucharaine	2.15	level2			330.167	37.1	NEG	C19H25NO4				Alkaloids	生物碱	Tryptophan alkaloids	Quinoline alkaloids	PBWIOAMUZKICDN-JLHYYAGUSA-N	5.8585e-06	1.4449e-05	9.78185e-06	1.00298e-05	3.17188e-05	2.79837e-05	4.99402e-05	3.65476e-05	1.40581	0.0213642	0.19111	3.64391	1.86549
1810	beta-N-Methylaminoalanine	2.14	level2			119.083	252.6	POS	C4H10N2O2				Amino acids and Peptides	氨基酸及短肽	Small peptides	Aminoacids	UJVHVMNGOZXSOZ-VKHMYHEASA-N	5.86586e-06	6.09735e-06	7.34213e-06	6.43511e-06	7.84385e-06	8.413e-06	9.5375e-06	8.59812e-06	1.33511	0.0329938	0.221897	1.33613	0.418055
1815	2-(3,4-dimethoxyphenoxy)-6-[(3,4,5-trihydroxyoxan-2-yl)oxymethyl]oxane-3,4,5-triol	2.14	level2			493.162	223.3	NEG	C19H28O12								BUKNGVJDVSRYIT-UHFFFAOYSA-N	0.000239084	0.00021992	0.000260185	0.00023973	0.000166915	3.3899e-05	7.80174e-05	9.29437e-05	1.20057	0.0228203	0.195631	0.387702	-1.36698
1816	E-3,4,5'-trihydroxy-3'-glucopyranosylstilbene	2.14	level2			406.121	220.3	POS	C20H22O9				Shikimates and Phenylpropanoids	莽草酸及苯丙酸类	Stilbenoids	Monomeric stilbenes	PERPNFLGJXUDDW-CUYWLFDKSA-N	1.58023e-05	1.81753e-05	1.0686e-05	1.48879e-05	2.33451e-05	2.67975e-05	3.39146e-05	2.80191e-05	1.32706	0.0262784	0.205018	1.88201	0.912271
1825	Methyl_nomilinate_17-glucoside	2.13	level2			727.309	269.8	POS	C35H50O16	HMDB0039887			Terpenoids	萜类	Triterpenoids	Limonoids	UWQVYSUHQUNHFN-UHFFFAOYSA-N	2.51942e-05	1.38534e-05	1.45265e-05	1.7858e-05	1.07904e-06	4.83742e-07	1.17771e-06	9.13498e-07	1.51489	0.0434886	0.237455	0.0511533	-4.28903
1828	HMBOA + O-Hex	2.13	level2			356.103	150.9	NEG	C15H19NO9	HMDB0037263	17622-26-3		Alkaloids	生物碱			PMBZSEOAOIYRMW-UHFFFAOYSA-N	9.86113e-05	5.04336e-05	7.69725e-05	7.53391e-05	2.28985e-05	3.14125e-05	2.2553e-05	2.56213e-05	1.43113	0.0250333	0.201364	0.34008	-1.55605
1833	IRIGENIN	2.12	level2			359.073	26.6	NEG	C18H16O8	HMDB0303159		C17957	Shikimates and Phenylpropanoids	莽草酸及苯丙酸类	Isoflavonoids	Isoflavones	TUGWPJJTQNLKCL-UHFFFAOYSA-N	8.44394e-06	7.90496e-06	7.14504e-06	7.83131e-06	4.81741e-06	3.71386e-06	4.54342e-06	4.35823e-06	1.48398	0.00229047	0.097894	0.556513	-0.845512
1839	Apocynin_A	2.11	level2			469.12	191.2	POS	C24H20O10				Shikimates and Phenylpropanoids	莽草酸及苯丙酸类	Flavonoids	Flavan-3-ols	WHASVNKXAVKAJA-GXOFAXAKSA-N	0.000396089	0.000219034	0.000249559	0.000288227	2.02109e-05	6.83865e-05	1.96853e-05	3.60942e-05	1.44907	0.011468	0.156454	0.125228	-2.99737
1847	beta-D-Glucopyranoside,_4-[(1R,3aR,4S,6aS)-6a-(acetyloxy)tetrahydro-4-(4-hydroxy-3-methoxyphenyl)-1H,3H-furo[3,4-c]furan-1-yl]-2-methoxyphenyl	2.1	level2			596.228	257.9	POS	C28H34O13				Shikimates and Phenylpropanoids	莽草酸及苯丙酸类	Lignans	Furofuranoid lignans	ARPKCZZZMDEOIF-FTCJPABESA-N	0.000148556	8.13822e-05	0.000107848	0.000112595	1.35801e-05	1.0385e-05	1.46785e-05	1.28812e-05	1.52644	0.0358088	0.227896	0.114403	-3.12781
1850	Tricyclo[12.3.1.1.2,6.]nonadeca-1(18),2,4,6(19),14,16-hexaene-3,9,15-triol, 16,17-dimethoxy-	2.1	level2			400.218	40.2	POS	C21H26O5				Shikimates and Phenylpropanoids	莽草酸及苯丙酸类	Diarylheptanoids	Biaryl type diarylheptanoids	SBGBAZQAEOWGFT-UHFFFAOYSA-N	1.20176e-06	2.08105e-06	1.29458e-06	1.52579e-06	2.92248e-06	3.53674e-06	2.35809e-06	2.9391e-06	1.31111	0.0325333	0.221127	1.92628	0.945815
1853	3-O-Neohesperidoside Quercetin	2.09	level2			609.122	203.3	NEG	C27H30O16				Shikimates and Phenylpropanoids	莽草酸及苯丙酸类	Flavonoids	Flavonols	FYBMGZSDYDNBFX-GXPPAHCZSA-N	2.16755e-05	1.48488e-05	1.35064e-05	1.66769e-05	2.55911e-06	4.67914e-06	2.75069e-06	3.32965e-06	1.49836	0.00699298	0.134784	0.199656	-2.32441
1857	Scutellarioside II	2.09	level2			507.157	24.6	NEG	C24H28O12				Terpenoids	萜类	Monoterpenoids	Iridoids monoterpenoids	MVTLXFDHKDVAIC-LQQBYVAQSA-N	0.000124428	0.000109638	0.000147134	0.000127067	2.69537e-05	5.09246e-05	1.52179e-05	3.1032e-05	1.41183	0.00316603	0.106698	0.244219	-2.03375
1865	Diosbulbin_H	2.08	level2			419.212	35.3	POS	C23H30O7	HMDB0036781	67567-13-9		Terpenoids	萜类	Diterpenoids		KMLQBHMEPVHNNG-UHFFFAOYSA-N	2.78281e-07	8.09316e-07	6.03797e-07	5.63798e-07	1.5927e-06	1.39294e-06	8.95457e-07	1.2937e-06	1.20326	0.0477064	0.237455	2.29461	1.19825
1868	Estr-5-ene-3,11-dione, 17-[(1R,3E)-1,5-dihydroxy-1,5-dimethyl-2-oxo-3-hexen-1-yl]-2-(beta-D-glucopyranosyloxy)-16-hydroxy-4,4,9,14-tetramethyl-, (2beta,9beta,10alpha,16alpha,17beta)-	2.07	level2			696.404	274.4	POS	C36H54O12				Terpenoids	萜类	Triterpenoids	Cucurbitane triterpenoids	GOWXUGYRPHOTEQ-QYNXQQORSA-N	1.29196e-05	6.52679e-06	1.29546e-05	1.08003e-05	3.15992e-06	1.99204e-06	1.70521e-06	2.28572e-06	1.44828	0.017525	0.177809	0.211635	-2.24035
1886	Ancistrocladine	2.05	level2			408.212	177.2	POS	C25H29NO4				Alkaloids	生物碱	Tyrosine alkaloids	Isoquinoline alkaloids	XUFOYASAFNKRRE-GJZGRUSLSA-N	2.66606e-06	7.22271e-06	5.74756e-06	5.21211e-06	1.39628e-05	1.10744e-05	1.32896e-05	1.27756e-05	1.31333	0.00914302	0.145209	2.45114	1.29345
1897	4-hydroxy-9-(3,4,5-trimethoxyphenyl)-5a,6,8a,9-tetrahydro-5H-[2]benzofuro[5,6-f][1,3]benzodioxol-8-one	2.02	level2			459.136	27.9	NEG	C22H22O8				Shikimates and Phenylpropanoids	莽草酸及苯丙酸类	Lignans	Arylnaphthalene and aryltetralin lignans	HLBPOYVRLSXWJJ-UHFFFAOYSA-N	0.00156548	0.00161246	0.00133229	0.00150341	0.000207312	0.000371773	0.000181398	0.000253494	1.51583	0.000286912	0.0546207	0.168613	-2.56821
1899	Evoxine	2.01	level2			370.121	150.7	POS	C18H21NO6				Alkaloids	生物碱	Tryptophan alkaloids	Quinoline alkaloids	FGANMDNHTVJAHL-UHFFFAOYSA-N	0.000267822	0.000232505	0.000153249	0.000217859	9.36897e-06	1.05873e-05	1.26478e-05	1.0868e-05	1.54632	0.0256747	0.203409	0.0498856	-4.32523
1901	15-hydroxypentadecanoate	1.99	level3.1			257.212	302.5	NEG	C15H30O3								BZUNJUAMQZRJIP-UHFFFAOYSA-N	4.3672e-05	0.000166605	8.51051e-05	9.84608e-05	0.000357352	0.000312514	0.000504973	0.000391613	1.3622	0.012814	0.16152	3.97735	1.99181
1903	2,3-Dinor-8-iso prostaglandin F1alpha	1.97	level3.1			327.217	239.1	NEG	C18H32O5								XHHYJZGDOMKLEE-UHFFFAOYSA-N	0.000161616	0.000425104	0.000194381	0.000260367	0.000890103	0.000681288	0.00142083	0.000997406	1.37413	0.0350706	0.226177	3.83077	1.93763
1905	1-18:2-2-18:3-phosphatidate	1.96	level3.1			693.449	330.9	NEG	C39H67O8P								AQTVREATJUABJU-UHFFFAOYSA-N	0.00476546	0.00458697	0.00204254	0.00379832	0.00165793	0.000525891	0.000670918	0.00095158	1.3288	0.0399023	0.235685	0.250526	-1.99697
1906	2-Oxophytanate	1.96	level3.1			325.274	306.5	NEG	C20H38O3								CQJGVSCAFSXDSB-UHFFFAOYSA-N	1.89959e-05	3.76547e-05	1.78676e-05	2.48394e-05	9.1065e-05	8.92864e-05	4.83223e-05	7.62246e-05	1.34991	0.0287165	0.211103	3.0687	1.61763
1913	1-nonadecanoyl-glycero-3-phosphate	1.94	level3.1			451.283	333.1	NEG	C22H45O7P								YAERNOYIELLICR-UHFFFAOYSA-N	6.13109e-05	0.00010084	0.000184559	0.00011557	0.000310492	0.000237699	0.000305441	0.000284544	1.30722	0.0174433	0.177551	2.46209	1.29988
1918	2-Hydroxyphytanate	1.92	level3.1			327.29	307.8	NEG	C20H40O3								CGKMKXBKVBXUGK-UHFFFAOYSA-N	1.83731e-05	4.26269e-05	3.35823e-05	3.15274e-05	7.22455e-05	6.7057e-05	6.87259e-05	6.93428e-05	1.33583	0.0064132	0.13056	2.19944	1.13714
1919	N-palmitoyldopamine	1.92	level3.1			390.301	305.1	NEG	C24H41NO3								TWJJFOWLTIEYFO-UHFFFAOYSA-N	1.40232e-06	3.84642e-06	4.0978e-06	3.11551e-06	2.03679e-05	3.60641e-05	4.11162e-05	3.25161e-05	1.4742	0.0400736	0.236078	10.4368	3.38361
1921	3-Methylindolepyruvate	1.92	level3.1			216.066	169.6	NEG	C12H11NO3								VSANSNPZLCXLRK-UHFFFAOYSA-N	0.000156211	9.92807e-05	0.000147087	0.000134193	5.90222e-05	2.3639e-05	1.77914e-05	3.34842e-05	1.37933	0.00996698	0.148726	0.249523	-2.00276
1924	Hibifolin	1.91	level3.1			493.06	149.6	NEG	C21H18O14								KHVMAMXQPVHXTJ-UHFFFAOYSA-N	1.90324e-05	1.15728e-05	1.75967e-05	1.60673e-05	9.36217e-06	4.78797e-06	6.73402e-06	6.96138e-06	1.33439	0.0261247	0.204615	0.433265	-1.20668
1925	1-20:2-2-18:3-phosphatidylethanolamine	1.9	level3.1			766.534	333.8	POS	C43H76NO8P								AWJMEKMEOPNUNJ-UHFFFAOYSA-N	3.36353e-05	1.71325e-05	3.13226e-05	2.73635e-05	7.20417e-06	7.12351e-06	1.99994e-06	5.44254e-06	1.36276	0.0157246	0.172924	0.198898	-2.3299
1926	4-(Dodecylamino)Phenol	1.9	level3.1			278.247	292.5	POS	C18H31NO								UFCRKZJPBDDMSF-UHFFFAOYSA-N	2.01185e-05	1.53199e-05	2.06368e-05	1.86917e-05	1.46752e-05	1.28451e-05	1.35367e-05	1.36856e-05	1.27569	0.0477839	0.237455	0.732176	-0.449737
1930	1,2,2'-Trisinapoylgentiobioside	1.9	level3.1			959.282	183.6	NEG	C45H52O23								HVHNDGOZMSAQDC-UHFFFAOYSA-N	6.82521e-09	6.96445e-09	5.852e-07	1.99663e-07	1.31929e-06	7.17654e-07	1.31427e-06	1.11707e-06	1.2094	0.0297897	0.213968	5.59478	2.48408
1931	Quercetin 3-O-xylosyl-glucuronide	1.9	level3.1			609.107	170.4	NEG	C26H26O17								DKHSNOLJPXJJMD-UHFFFAOYSA-N	4.87261e-05	3.2818e-05	5.58032e-05	4.57824e-05	2.26879e-05	1.89497e-05	1.28312e-05	1.81563e-05	1.38742	0.0200511	0.186688	0.396577	-1.33433
1932	Andre	1.89	level3.1			327.2	276.1	NEG	C21H28O3								LUTSRLYCMSCGCS-UHFFFAOYSA-N	2.41385e-05	7.58665e-05	3.52528e-05	4.50859e-05	0.000144447	0.000226105	0.000312682	0.000227745	1.39851	0.0232127	0.196347	5.05135	2.33667
1934	Ciprostene	1.88	level3.1			365.267	281.7	POS	C22H36O4								VKPYUUBEDXIQIB-UHFFFAOYSA-N	2.70698e-05	4.70264e-05	4.15508e-05	3.8549e-05	0.000130182	0.00019361	0.000217593	0.000180462	1.49174	0.00606318	0.127938	4.68136	2.22693
1936	9-hydroxy traumatin	1.88	level3.1			227.129	202.8	NEG	C12H20O4								ADPDWAFVBDMZSV-UHFFFAOYSA-N	8.89434e-06	2.47423e-05	1.20468e-05	1.52278e-05	5.55383e-05	3.8344e-05	8.43158e-05	5.93994e-05	1.36803	0.0362942	0.229197	3.90072	1.96374
1938	5,7-Dihydroxy-3',4'-dimethoxy-8-(3-hydroxy-3-methylbutyl)-isoflavone 7-glucoside	1.88	level3.1			561.199	183.6	NEG	C28H34O12								AQOVBCDOFOOETK-UHFFFAOYSA-N	7.07247e-05	6.59223e-05	8.81793e-05	7.49421e-05	1.30992e-05	1.32025e-05	4.80286e-06	1.03682e-05	1.47721	0.00090767	0.0767675	0.138349	-2.85361
1939	C20 sphinganine	1.87	level3.1			330.335	303	POS	C20H43NO2								UFMHYBVQZSPWSS-UHFFFAOYSA-N	0.000161249	0.000128934	0.000124262	0.000138148	4.65439e-05	4.3389e-05	6.02679e-05	5.00669e-05	1.50748	0.00228997	0.097894	0.362414	-1.46429
1941	Malvidin 3-(6-(4-feruloyl-alpha-rhamnosyl)-beta-glucoside) 5-beta-glucoside [M]	1.87	level3.1			975.277	178.4	NEG	C45H52O24								VEUBIJCEGPLGKZ-UHFFFAOYSA-O	6.46733e-06	9.88842e-06	7.1101e-06	7.82195e-06	8.92215e-07	6.12062e-07	2.43613e-07	5.8263e-07	1.49467	0.00245887	0.0999295	0.0744866	-3.74688
1947	2-Hydroxysterculic acid	1.86	level3.1			309.243	289.9	NEG	C19H34O3								NIMPMJIXSJYVEO-UHFFFAOYSA-N	6.43231e-05	6.63927e-05	2.61533e-05	5.22897e-05	0.00025776	0.000155593	0.000291933	0.000235095	1.40697	0.0131396	0.162697	4.49601	2.16865
1951	Diethylene glycol dimethacrylate	1.85	level3.1			241.108	201.9	NEG	C12H18O5								XFCMNSHQOZQILR-UHFFFAOYSA-N	1.98383e-05	0.000103767	1.2502e-05	4.53692e-05	0.000184037	0.000203558	0.00040048	0.000262692	1.29643	0.0443396	0.237455	5.7901	2.53359
1956	Dihydroxyoctadecenoic acid	1.84	level3.1			315.252	264.6	POS	C18H34O4								WBZXABQRBWTVNN-UHFFFAOYSA-N	2.23812e-06	6.51787e-06	5.83708e-06	4.86436e-06	3.07597e-05	1.41308e-05	3.66225e-05	2.7171e-05	1.38906	0.0314067	0.218345	5.58573	2.48175
1957	1-14:0-2-lysophosphatidylserine	1.84	level3.1			470.246	246.2	POS	C20H40NO9P								ZJMQYSXCPARLHG-UHFFFAOYSA-N	5.42439e-05	8.72089e-05	4.77956e-05	6.30828e-05	3.15751e-05	2.30915e-05	2.11486e-05	2.52717e-05	1.40551	0.0400822	0.236085	0.400612	-1.31972
1961	1-(3,4-Dihydroxyphenyl)-5-hydroxy-3-decanone	1.84	level3.1			279.16	219.2	NEG	C16H24O4								QYRSUDCXGPMNSS-UHFFFAOYSA-N	5.85062e-06	4.51631e-06	2.9791e-06	4.44868e-06	9.8619e-06	6.29634e-06	8.62554e-06	8.26126e-06	1.24674	0.0460718	0.237455	1.85701	0.892985
1967	N-Eicosapentaenoyl Threonine	1.83	level3.1			404.281	288.3	POS	C24H37NO4								MXCKXZGSPCHJNK-UHFFFAOYSA-N	2.18559e-05	1.38597e-05	1.42489e-05	1.66548e-05	2.95299e-06	4.83222e-06	4.00244e-06	3.92921e-06	1.49917	0.00873958	0.142826	0.23592	-2.08363
1974	1-18:3-2-18:3-phosphatidylethanolamine	1.82	level3.1			736.497	322.7	POS	C41H70NO8P								WIHSZOXPODIZSW-UHFFFAOYSA-N	9.21753e-06	3.92849e-06	6.75539e-06	6.6338e-06	7.03749e-07	2.08167e-06	3.05612e-06	1.94718e-06	1.23716	0.048785	0.237969	0.293524	-1.76845
1982	Arachidoyl Ethanolamide	1.81	level3.1			356.351	323.5	POS	C22H45NO2	HMDB0248559	94421-69-9		Fatty acids	脂肪酸	Fatty amides	N-acyl ethanolamines (endocannabinoids)	AUJVQJHODMISJP-UHFFFAOYSA-N	4.61621e-06	5.1737e-06	6.54851e-06	5.44614e-06	1.77943e-06	1.9182e-06	2.89493e-06	2.19752e-06	1.44046	0.00847843	0.141571	0.4035	-1.30936
1988	7-[3-[(E,3R)-3-Hydroxyoct-1-enyl]-6-thiabicyclo[3.1.1]heptan-4-yl]hept-5-enoic acid	1.81	level3.1			365.219	241.9	NEG	C21H34O3S								OVGWMUWIRHGGJP-UHFFFAOYSA-N	1.32515e-07	1.74875e-07	1.00427e-06	4.37221e-07	3.46433e-06	1.42186e-06	2.23463e-06	2.37361e-06	1.30889	0.0422756	0.237455	5.42885	2.44065
1991	3-Hydroxy-10'-apo-b,y-carotenal	1.8	level3.1			393.278	310.2	POS	C27H36O2								HQPQTQQUHPFUOA-UHFFFAOYSA-N	5.87924e-06	4.67491e-06	7.45353e-06	6.00256e-06	1.11476e-05	1.2454e-05	1.52657e-05	1.29558e-05	1.44518	0.00882912	0.143455	2.15837	1.10995
1992	7',8'-Dihydro-8'-hydroxyreticulataxanthin	1.8	level3.1			491.351	302.5	POS	C33H46O3								IMAVGDVEEYAALY-UHFFFAOYSA-N	1.06283e-06	1.88335e-06	8.37598e-07	1.26126e-06	8.11036e-06	1.23347e-05	1.43702e-05	1.16051e-05	1.50067	0.0052266	0.12227	9.2012	3.20182
1995	5,6-DHET	1.8	level3.1			337.238	269.4	NEG	C20H34O4								GFNYAPAJUNPMGH-UHFFFAOYSA-N	3.95252e-05	5.66858e-05	4.07071e-05	4.56394e-05	0.000138022	9.21757e-05	0.000106461	0.00011222	1.45905	0.0104131	0.150916	2.45883	1.29797
2002	3-Hydroxy-palmitic acid methyl ester	1.79	level3.1			285.243	316.5	NEG	C17H34O3								YBTWUESFQWFDMR-UHFFFAOYSA-N	1.90973e-05	7.10191e-05	3.08035e-05	4.03066e-05	0.000134212	9.56822e-05	0.000125515	0.00011847	1.29784	0.0162365	0.174276	2.93922	1.55543
2008	5-S-glutathionyl-DOPA	1.79	level3.1			501.13	48.5	NEG	C19H26N4O10S								QPUCCRKMCAEIND-UHFFFAOYSA-N	1.39096e-05	3.13009e-05	2.06504e-05	2.19536e-05	3.45541e-06	1.07923e-05	2.76339e-06	5.67035e-06	1.31767	0.0455461	0.237455	0.258288	-1.95295
2013	9-Methoxyellipticine	1.78	level3.1			275.122	258.4	NEG	C18H16N2O								BKRMCDAOAQWNTG-UHFFFAOYSA-N	4.30706e-06	3.93639e-06	6.80167e-06	5.01504e-06	7.70921e-06	1.20892e-05	8.70816e-06	9.50218e-06	1.30183	0.0487455	0.23788	1.89474	0.921998
2014	9,10,13-TriHOME	1.78	level3.1			329.233	234.3	NEG	C18H34O5								NTVFQBIHLSPEGQ-UHFFFAOYSA-N	0.00121372	0.0035245	0.00181721	0.00218514	0.0105632	0.00767019	0.0118586	0.0100307	1.43272	0.00521913	0.122261	4.59039	2.19862
2015	2,3-Dimethylmaleate	1.78	level3.1			143.035	166.6	NEG	C6H8O4								CGBYBGVMDAPUIH-UHFFFAOYSA-N	0.000127477	0.000120972	9.01031e-05	0.000112851	4.84084e-05	5.96522e-05	4.42938e-05	5.07848e-05	1.47779	0.00747944	0.137109	0.450017	-1.15195
2020	Mangostanol	1.77	level3.1			427.171	199.6	POS	C24H26O7								KCMPFWGUVNEDHW-UHFFFAOYSA-N	0.000213343	0.000278301	0.000200373	0.000230672	0.000138407	0.000126812	9.14222e-05	0.000118881	1.41056	0.0161218	0.174052	0.515366	-0.956332
2028	Curculigoside	1.77	level3.1			465.145	182.1	NEG	C22H26O11								SJJRKHVKAXVFJQ-UHFFFAOYSA-N	0.00098093	0.000436868	0.000602119	0.000673305	0.000198001	0.000191355	0.000116833	0.00016873	1.4303	0.0364638	0.229605	0.250599	-1.99655
2029	Grandidentatin	1.77	level3.1			423.16	158.6	NEG	C21H28O9								ZTMPDTJBTNGZJH-UHFFFAOYSA-N	1.93104e-05	1.77013e-05	2.06356e-05	1.92157e-05	8.04714e-06	6.67332e-06	5.58847e-06	6.76965e-06	1.51977	0.000356703	0.0568472	0.352297	-1.50513
2032	pheophorbide b	1.76	level3.1			607.261	192.5	POS	C35H34N4O6								PROPHBCDMQAJMH-UHFFFAOYSA-N	4.94302e-05	6.08827e-05	4.82586e-05	5.28572e-05	1.72954e-05	1.30112e-05	1.55592e-05	1.52886e-05	1.53325	0.000875718	0.0754556	0.289243	-1.78964
2036	Oleic acid methyl ester	1.76	level3.1			295.264	350.9	NEG	C19H36O2								QYDYPVFESGNLHU-UHFFFAOYSA-N	1.70792e-05	5.44134e-05	1.81714e-05	2.9888e-05	0.000125504	8.52236e-05	0.000133664	0.000114797	1.36158	0.0118138	0.157986	3.84091	1.94145
2040	Cibaric acid	1.76	level3.1			323.186	231.4	NEG	C18H28O5								LFTUCYCUYUJMJB-UHFFFAOYSA-N	2.12107e-05	9.28717e-05	3.40912e-05	4.93912e-05	0.000356394	0.000135686	0.000370415	0.000287498	1.3419	0.0396156	0.235198	5.82084	2.54123
2048	C20 phytosphingosine	1.75	level3.1			346.33	259.9	POS	C20H43NO3								UQAUXYMLKGFKBX-UHFFFAOYSA-N	5.81182e-05	5.68694e-05	7.86165e-05	6.45347e-05	4.46364e-05	3.65951e-05	4.74781e-05	4.29032e-05	1.29058	0.0495604	0.239763	0.664808	-0.58899
2050	6-Methylgingediol	1.75	level3.1			309.207	235.1	NEG	C18H30O4								HDNGHNOEMOMCKM-UHFFFAOYSA-N	0.000114577	0.000277192	3.44139e-05	0.000142061	0.000467985	0.000469263	0.00089609	0.000611113	1.23825	0.0422679	0.237455	4.30177	2.10493
2060	Methylsyringin	1.74	level3.1			385.15	182.2	NEG	C18H26O9								KDZYNPVXUQIVAO-UHFFFAOYSA-N	0.00300645	0.00372568	0.00401206	0.0035814	0.0015884	0.00220383	0.00116779	0.00165334	1.39327	0.0104592	0.151174	0.461647	-1.11514
2062	Hericene C	1.73	level3.1			585.45	334.4	POS	C37H60O5								MUPDKCFZUFURPT-UHFFFAOYSA-N	3.75631e-05	1.78654e-05	3.69649e-05	3.07978e-05	1.23652e-05	1.43347e-05	4.63735e-06	1.04458e-05	1.2391	0.0458774	0.237455	0.339172	-1.55991
2065	Murrayanol	1.73	level3.1			364.224	250.7	POS	C24H29NO2								RTEIBQDXHHQYRJ-UHFFFAOYSA-N	7.93803e-06	2.33392e-05	1.2703e-05	1.46601e-05	2.49152e-05	3.26437e-05	3.65678e-05	3.13756e-05	1.21604	0.0426116	0.237455	2.1402	1.09775
2067	Eicosanedioic acid	1.73	level3.1			341.269	336.7	NEG	C20H38O4								JJOJFIHJIRWASH-UHFFFAOYSA-N	1.95924e-06	3.85119e-06	1.57233e-06	2.46092e-06	9.86405e-06	1.11218e-05	1.92773e-05	1.3421e-05	1.44385	0.0224936	0.194728	5.45367	2.44723
2069	alpha-Tocopheryloxyacetic acid	1.73	level3.1			487.379	303.1	NEG	C31H52O4								LCFWOFKPFDWYLR-UHFFFAOYSA-N	2.93925e-05	1.46639e-05	1.32979e-05	1.91181e-05	4.48983e-05	0.000104938	0.000117025	8.89536e-05	1.38104	0.0379926	0.232741	4.65284	2.21811
2076	Nelumboside	1.73	level3.1			639.117	167.9	NEG	C27H28O18								RFPZGZUMXXMVEL-UHFFFAOYSA-N	0.000155757	0.000152567	0.000106317	0.000138214	4.52496e-05	5.12164e-05	5.18656e-05	4.94439e-05	1.51269	0.0291052	0.212347	0.357734	-1.48304
2081	7-[5-[(E,3S)-3-Hydroxyoct-1-enyl]-2,3-diazabicyclo[2.2.1]hept-2-en-6-yl]hept-5-enoic acid	1.72	level3.1			349.251	286.4	POS	C20H32N2O3								XBVVXCYNLAIXKD-UHFFFAOYSA-N	7.41336e-05	0.000121874	8.78062e-05	9.46046e-05	0.000234437	0.00037536	0.000326295	0.000312031	1.46922	0.00760526	0.137109	3.29826	1.72171
2085	S-(N,N-Diethylcarbamoyl)glutathione	1.72	level3.1			407.157	66.7	POS	C15H26N4O7S								WZXBYDBYBIGAQN-UHFFFAOYSA-N	5.39202e-07	5.12246e-07	1.67709e-07	4.06385e-07	3.56124e-08	9.33204e-08	6.61583e-09	4.51829e-08	1.30249	0.0418037	0.237455	0.111182	-3.169
2098	7-[4-[Oct-6-enyl]-2,3-diazabicyclo[2.2.1]hept-2-en-6-yl]hept-5-enoic acid	1.7	level3.1			333.256	322	POS	C20H32N2O2								PEZZZRQWIOKEBE-UHFFFAOYSA-N	5.44078e-09	5.69788e-09	1.41393e-07	5.08438e-08	6.17352e-06	5.96611e-06	3.86087e-06	5.3335e-06	1.46374	0.0186897	0.181632	104.9	6.71287
2101	Ptelatoside B	1.7	level3.1			427.161	199.3	NEG	C20H28O10								DIBOBJSTTKLQQV-UHFFFAOYSA-N	1.05149e-05	1.02345e-05	1.16567e-05	1.08021e-05	5.72535e-06	7.92746e-06	5.15063e-06	6.26782e-06	1.40482	0.00886909	0.143488	0.580243	-0.785272
2107	N-Docosahexaenoyl Tryptophan	1.69	level3.1			515.319	283.7	POS	C33H42N2O3								NZXJGDADEBTMSQ-UHFFFAOYSA-N	1.30689e-05	4.25472e-06	9.573e-06	8.96556e-06	1.86542e-06	9.53418e-07	4.28332e-07	1.08239e-06	1.39143	0.038558	0.233738	0.120728	-3.05017
2121	Hexadeca-6,8-dienedioylcarnitine	1.68	level3.1			426.284	203.1	POS	C23H39NO6								RQVCQRAPHKKDFP-UHFFFAOYSA-N	2.52586e-06	4.77139e-06	5.83261e-06	4.37662e-06	8.30493e-06	1.58303e-05	1.14936e-05	1.18763e-05	1.32611	0.0348613	0.225796	2.71357	1.44019
2124	4-O-Methylglucuronic acid	1.68	level3.1			207.051	24.3	NEG	C7H12O7								QGGOCWIJGWDKHC-UHFFFAOYSA-N	4.2791e-05	5.42645e-05	5.44994e-05	5.05183e-05	8.5486e-05	7.05389e-05	7.76542e-05	7.7893e-05	1.42525	0.00913719	0.145209	1.54188	0.624689
2128	2-omega-hydroxy-C22:0-LPA	1.67	level3.1			509.32	338.2	NEG	C25H51O8P								JTGVYOAJURQLDS-UHFFFAOYSA-N	3.32226e-06	3.73e-06	1.86412e-06	2.97213e-06	1.57491e-05	1.44662e-05	1.61311e-05	1.54488e-05	1.50258	7.97005e-05	0.0476228	5.19788	2.37792
2129	4-Hydroxy-3-nitrophenyl acetate	1.67	level3.1			196.026	262.8	NEG	C8H7NO5								YKNOPKRLJYDXNF-UHFFFAOYSA-N	2.38839e-05	9.29021e-05	2.56793e-05	4.74884e-05	0.000126059	0.000168383	0.000222191	0.000172211	1.30166	0.025513	0.20296	3.62638	1.85853
2130	xi-7-Hydroxyhexadecanedioic acid	1.67	level3.1			301.202	218.3	NEG	C16H30O5								BNKCVLYEVLBHCL-UHFFFAOYSA-N	3.90888e-05	8.73429e-06	3.44077e-05	2.74103e-05	0.000134018	0.000101562	0.000105003	0.000113528	1.34056	0.00350937	0.110372	4.14179	2.05026
2134	Corepoxylone	1.66	level3.1			561.448	339.4	POS	C35H60O5								HNFUHWXJCCMXEW-UHFFFAOYSA-N	3.84637e-06	9.06463e-06	8.15924e-06	7.02341e-06	1.77859e-05	1.85171e-05	1.30007e-05	1.64346e-05	1.30408	0.0163657	0.174809	2.33997	1.22649
2137	N-Myristoyl Aspartic acid	1.66	level3.1			344.242	241.1	POS	C18H33NO5								MLOYYKYQLFOZOE-UHFFFAOYSA-N	2.81836e-05	7.83559e-05	3.44076e-05	4.69824e-05	0.00013447	0.000122667	0.000205023	0.000154053	1.35638	0.0238284	0.197918	3.27896	1.71324
2145	Hexosylsphingosine	1.65	level3.1			478.336	260.5	POS	C24H47NO8								DHFHTNWDXYUZBB-UHFFFAOYSA-N	6.35895e-06	3.77355e-06	7.80515e-06	5.97922e-06	4.55333e-05	4.20336e-05	2.39196e-05	3.71622e-05	1.48488	0.0101442	0.149731	6.21522	2.63581
2146	Acenocoumarol	1.65	level3.1			352.086	194.7	NEG	C19H15NO6	HMDB0015487	152-72-7	D07064	Shikimates and Phenylpropanoids	莽草酸及苯丙酸类	Coumarins	Simple coumarins	VABCILAOYCMVPS-UHFFFAOYSA-N	0.000150662	0.000189792	0.000156507	0.000165654	0.000101167	7.31356e-05	4.51868e-05	7.31632e-05	1.35959	0.0102634	0.150429	0.441664	-1.17898
2150	2-Hydroxyundec-3-enoylcarnitine	1.63	level3.1			344.242	228	POS	C18H33NO5								RUXASPBZTQHYAL-UHFFFAOYSA-N	0.000100233	0.000140346	5.94237e-05	0.000100001	0.000215308	0.000176135	0.000259312	0.000216918	1.28618	0.0251449	0.201687	2.16916	1.11713
2151	2-Aminobut-2-enoate	1.63	level3.1			102.055	85	POS	C4H7NO2								PAWSVPVNIXFKOS-UHFFFAOYSA-N	0.00023895	0.000220034	0.000226252	0.000228412	0.000283679	0.000280955	0.000272535	0.000279056	1.504	0.00146263	0.0853472	1.22172	0.288919
2153	3-hydroxyundecanoyl carnitine	1.62	level3.1			346.257	226.8	POS	C18H35NO5								WJHMEFKQZOKPMH-UHFFFAOYSA-N	0.000452724	0.0011728	0.000483776	0.000703098	0.00221759	0.00172636	0.00212706	0.00202367	1.35678	0.00911801	0.1451	2.87822	1.52518
2158	Indoxyl glucuronide	1.62	level3.1			308.077	153.8	NEG	C14H15NO7								KUYNOZVWCFXSNE-UHFFFAOYSA-N	2.88471e-05	3.78498e-05	2.83686e-05	3.16885e-05	1.45721e-05	1.27326e-05	3.92545e-06	1.041e-05	1.29338	0.00915629	0.145304	0.328511	-1.60598
2159	trans-Caffeic acid [apiosyl-(1->6)-glucosyl] ester	1.62	level3.1			473.13	153.6	NEG	C20H26O13								LULOGYYPGZOKQW-UHFFFAOYSA-N	5.76006e-06	5.97269e-06	3.18114e-06	4.9713e-06	2.47492e-06	1.70074e-06	2.33443e-06	2.17003e-06	1.34977	0.0392473	0.234875	0.436512	-1.19591
2161	Simmondsin 2'-ferulate	1.62	level3.1			550.187	143.1	NEG	C26H33NO12								GWXJMPVVJCHQIB-UHFFFAOYSA-N	6.93226e-05	0.000187072	0.000119719	0.000125371	0.000318533	0.000252522	0.000265761	0.000278939	1.28516	0.0179051	0.179173	2.2249	1.15374
2163	Henicosa-5,14,17-trienoylcarnitine	1.61	level3.1			464.38	330.1	POS	C28H49NO4								XLTQIAYAMBNGSS-UHFFFAOYSA-N	4.02534e-06	3.65119e-06	4.22584e-06	3.96746e-06	7.97855e-06	1.17862e-05	8.19382e-06	9.31952e-06	1.48189	0.0470174	0.237455	2.34899	1.23204
2169	phosphatidylserine (1,2-dimyristoyl)	1.6	level3.1			680.44	226	POS	C34H66NO10P								WKJDWDLHIOUPPL-UHFFFAOYSA-N	5.24709e-07	3.12805e-06	5.28266e-07	1.39367e-06	1.3063e-05	7.81221e-06	1.16053e-05	1.08269e-05	1.37911	0.00620202	0.129033	7.76858	2.95765
2174	Gravacridonediol glucoside	1.59	level3.1			504.185	171.9	POS	C25H29NO10								JWQLKRFRUYIERF-UHFFFAOYSA-N	6.90528e-06	1.24888e-05	1.10004e-05	1.01315e-05	5.52916e-06	4.22247e-06	2.49239e-06	4.08134e-06	1.31812	0.0326983	0.221282	0.402837	-1.31173
2177	3-O-beta-Galactopyranosylproanthocyanidin A5'	1.59	level3.1			737.165	216.1	NEG	C36H34O17								JUIIUJBWZYKSEP-UHFFFAOYSA-N	8.4734e-06	1.08062e-05	5.88851e-06	8.38937e-06	9.19273e-07	7.85109e-09	1.27063e-07	3.51396e-07	1.31223	0.0051628	0.122188	0.0418858	-4.57739
2183	gamma-Glutamyltryptophan	1.57	level3.1			334.139	65.9	POS	C16H19N3O5								CATMPQFFVNKDEY-UHFFFAOYSA-N	3.7113e-06	4.78168e-06	5.38236e-06	4.62511e-06	7.6716e-06	7.75659e-06	8.07227e-06	7.83349e-06	1.44354	0.00311474	0.106527	1.69369	0.760166
2197	benzodiazepinedione	1.52	level3.1			304.105	155.3	NEG	C18H15N3O2								AQDZAHJUWYRHGM-UHFFFAOYSA-N	1.23844e-05	1.29064e-05	1.01657e-05	1.18189e-05	7.84859e-06	7.42892e-06	7.53191e-06	7.60314e-06	1.47818	0.0349988	0.226008	0.643305	-0.636424
2201	Norswertianolin	1.49	level3.1			421.075	206	NEG	C19H18O11								MYWLBRTZOYHDOU-UHFFFAOYSA-N	2.70845e-05	2.53091e-05	3.63037e-05	2.95658e-05	0.000113393	0.000154664	8.36279e-05	0.000117228	1.48779	0.013704	0.164933	3.965	1.98732
2207			level4			281.137	252.7	POS										1.03319e-05	1.06502e-05	1.28731e-05	1.12851e-05	1.37066e-05	1.51236e-05	1.50636e-05	1.46313e-05	1.35683	0.0222929	0.194077	1.29652	0.374644
2220			level4			138.052	24	POS										0.000211644	0.000171404	0.000407551	0.000263533	0.000461641	0.00059819	0.000608126	0.000555986	1.29922	0.0281758	0.210156	2.10974	1.07706
2227			level4			153.023	147.4	NEG										1.34971e-05	1.44235e-05	1.51347e-05	1.43518e-05	3.67436e-06	2.23146e-06	7.26886e-06	4.39156e-06	1.36871	0.00316927	0.106732	0.305994	-1.70842
2228			level4			165.05	81.6	POS										3.76383e-05	3.76473e-05	4.88551e-05	4.13802e-05	3.27936e-05	2.51377e-05	2.31577e-05	2.70297e-05	1.30574	0.0392173	0.234875	0.653203	-0.614398
2229			level4			150.023	154.5	NEG										1.13188e-05	9.27275e-06	9.1136e-06	9.90171e-06	2.17729e-06	1.76662e-06	2.05516e-06	1.99969e-06	1.5454	0.000392431	0.0584001	0.201954	-2.3079
2237			level4			303.097	179.4	POS										8.36436e-05	5.55621e-05	0.000100745	7.99835e-05	1.82403e-05	3.65316e-05	1.76188e-05	2.41302e-05	1.40239	0.0185156	0.181111	0.30169	-1.72886
2239			level4			351.154	168.2	POS										4.03216e-05	3.34018e-05	4.46422e-05	3.94552e-05	1.85073e-05	1.45032e-05	1.65534e-05	1.65213e-05	1.50204	0.00272162	0.103009	0.418735	-1.25589
2244			level4			209.132	322	POS										7.02978e-07	9.069e-07	8.2792e-07	8.12599e-07	1.38402e-06	1.70209e-06	1.14957e-06	1.41189e-06	1.38597	0.0246803	0.200423	1.7375	0.797014
2251			level4			261.057	25.9	POS										7.47154e-05	0.000107926	0.000157795	0.000113479	0.000396389	0.000334074	0.000260704	0.000330389	1.42359	0.00923665	0.145784	2.91146	1.54174
2258			level4			164.073	182.5	POS										5.78541e-05	3.29567e-05	2.59712e-05	3.89274e-05	1.40269e-05	5.64608e-06	1.0513e-05	1.0062e-05	1.37507	0.044411	0.237455	0.258482	-1.95187
2260			level4			221.066	182.2	NEG										0.00016948	0.00019397	0.000219316	0.000194256	0.000114751	0.000137482	0.000144824	0.000132352	1.36881	0.0219297	0.193063	0.68133	-0.553574
2261			level4			385.159	199.1	POS										0.000193752	0.000169564	0.000199267	0.000187528	0.000144959	0.000138687	9.40629e-05	0.000125903	1.27221	0.0287706	0.21125	0.671382	-0.574794
2264			level4			321.107	162.6	POS										0.000250077	0.000308321	0.000323542	0.00029398	4.37445e-05	0.000157977	0.000120162	0.000107294	1.27825	0.00985137	0.147999	0.364972	-1.45414
2265			level4			203.106	266.5	POS										9.84959e-06	1.2927e-05	1.55744e-05	1.27837e-05	2.15767e-05	1.73799e-05	2.31378e-05	2.06981e-05	1.31871	0.0294519	0.21292	1.61911	0.695199
2273			level4			115.001	198.3	NEG										0.000134912	9.00887e-05	0.000125404	0.000116801	7.86371e-05	7.04189e-05	5.11746e-05	6.67435e-05	1.30802	0.0344343	0.2248	0.571428	-0.807357
2279			level4			283.174	43.5	POS										0.000394695	0.000435599	0.000484092	0.000438129	0.000720768	0.000515552	0.000713039	0.000649786	1.31885	0.0423218	0.237455	1.48309	0.56861
2280			level4			177.127	228	POS										2.34303e-05	5.52178e-05	2.66109e-05	3.50863e-05	9.94731e-05	7.20144e-05	9.07028e-05	8.73968e-05	1.34031	0.0156153	0.172258	2.49091	1.31667
2286			level4			179.04	19.3	POS										2.62209e-05	2.93776e-05	3.46885e-05	3.00956e-05	2.40405e-05	1.93175e-05	1.69759e-05	2.01113e-05	1.30647	0.0364684	0.229605	0.668246	-0.581549
2287			level4			285.117	128.6	POS										2.80046e-05	3.73001e-05	3.09822e-05	3.20956e-05	5.32743e-05	4.34036e-05	4.94247e-05	4.87009e-05	1.39603	0.0138879	0.165593	1.51737	0.601571
2291			level4			176.015	24.7	POS										9.10906e-06	1.41441e-05	1.97894e-05	1.43475e-05	4.21225e-05	4.6232e-05	4.99281e-05	4.60942e-05	1.46007	0.00114588	0.0803824	3.21269	1.68378
2298			level4			348.175	35.4	POS										2.75041e-06	4.52023e-06	1.24807e-05	6.58378e-06	3.93292e-05	1.99198e-05	3.29085e-05	3.07192e-05	1.36105	0.0200437	0.186688	4.66589	2.22215
2308			level4			252.227	356	POS										1.33141e-05	1.11809e-05	1.13501e-05	1.19483e-05	1.60302e-05	1.35212e-05	1.72893e-05	1.56136e-05	1.28872	0.0480727	0.237455	1.30676	0.38599
2311			level4			289.127	169.1	POS										1.4536e-05	1.22555e-05	1.56718e-05	1.41544e-05	4.72121e-06	6.11635e-06	3.36783e-06	4.73513e-06	1.47756	0.00181696	0.091771	0.334534	-1.57978
2320			level4			367.073	191.8	POS										3.00446e-05	1.53106e-05	2.00395e-05	2.17982e-05	1.1966e-06	1.77738e-06	9.75695e-07	1.31656e-06	1.53075	0.0417751	0.237455	0.0603976	-4.04936
2327			level4			233.062	24.7	POS										2.72299e-05	5.65041e-05	4.97743e-05	4.45028e-05	0.000114023	7.88175e-05	9.82285e-05	9.7023e-05	1.32948	0.0176467	0.178132	2.18016	1.12443
2333			level4			235.168	227	POS										3.13406e-05	6.67004e-05	3.85273e-05	4.55228e-05	0.00011828	9.3433e-05	0.0001254	0.000112371	1.38151	0.00995923	0.148713	2.46846	1.30361
2334			level4			677.253	221.9	POS										2.33264e-06	1.46974e-06	2.10316e-06	1.96851e-06	5.44491e-07	1.37034e-06	1.0929e-07	6.74708e-07	1.10486	0.0455069	0.237455	0.34275	-1.54477
2338			level4			301.14	359.2	POS										3.14401e-06	3.97853e-06	2.96969e-06	3.36408e-06	7.9679e-06	5.17867e-06	7.60373e-06	6.91676e-06	1.41511	0.0187171	0.181702	2.05607	1.03989
2345			level4			98.0134	359.2	POS										8.49511e-07	9.78405e-07	1.01474e-06	9.47551e-07	1.21401e-06	1.16023e-06	1.06944e-06	1.14789e-06	1.28883	0.0377392	0.232247	1.21143	0.276712
2348			level4			100.013	359.2	POS										5.44078e-09	5.69788e-09	5.74081e-07	1.95073e-07	9.64962e-07	6.43677e-07	1.03147e-06	8.80037e-07	1.18006	0.0378162	0.2323	4.51132	2.17355
2365			level4	Nornitrogen mustard	-5.46797439919654	143.034	359.2	POS										5.44078e-09	5.69788e-09	6.14832e-09	5.76233e-09	1.28493e-06	1.04184e-06	1.08243e-06	1.1364e-06	1.55665	0.0043923	0.115221	197.212	7.62361
2366			level4			144.047	359.2	POS										1.29551e-06	8.01939e-07	9.22098e-07	1.00652e-06	6.85906e-09	6.19632e-09	6.61583e-09	6.55707e-09	1.5537	0.021379	0.19111	0.00651461	-7.2621
2369			level4	5-N-Methyloxaluric acid	24.8005837040634	147.112	359.2	POS										7.62895e-07	4.16944e-07	6.06743e-07	5.95527e-07	6.85906e-09	6.19632e-09	3.7686e-07	1.29972e-07	1.16572	0.0428052	0.237455	0.218247	-2.19597
2379			level4			164.92	359.2	POS										5.44078e-09	4.47892e-07	6.14832e-09	1.5316e-07	1.29475e-06	8.32355e-07	8.32352e-07	9.86486e-07	1.20591	0.0174259	0.177467	6.44087	2.68726
2402			level4	Calcium tartrate	20.321236473348	189.159	359.2	POS										5.94677e-06	5.32104e-06	4.67941e-06	5.31574e-06	3.20812e-06	2.79009e-06	2.45297e-06	2.81706e-06	1.48337	0.00422196	0.114407	0.529946	-0.916082
2403			level4			191.07	359.2	POS										1.84674e-07	2.57907e-07	1.61134e-07	2.01239e-07	3.98439e-07	4.06942e-07	3.69939e-07	3.91773e-07	1.42706	0.00364426	0.111562	1.94681	0.961112
2420			level4	Piperazine phosphate	-19.6719105636331	203.149	359.2	POS										3.90196e-06	3.1117e-06	2.58466e-06	3.19944e-06	1.02345e-06	6.37794e-07	6.54611e-07	7.71953e-07	1.50313	0.00382542	0.112629	0.241277	-2.05124
2434			level4			237.163	359.2	POS										5.6638e-07	5.57826e-07	7.38585e-07	6.2093e-07	7.75092e-07	7.76989e-07	8.43838e-07	7.9864e-07	1.26936	0.0479411	0.237455	1.2862	0.363114
2441			level4			252.971	359.2	POS										6.4774e-07	8.64762e-07	7.86837e-07	7.66446e-07	5.83898e-07	5.4108e-07	3.35617e-07	4.86865e-07	1.2149	0.0483263	0.237455	0.635224	-0.654663
2442			level4			255.097	359.2	POS										2.18002e-06	2.24139e-06	1.26343e-06	1.89495e-06	6.85906e-09	6.64089e-07	6.61583e-09	2.25854e-07	1.25315	0.0122707	0.159576	0.119188	-3.06869
2443			level4			256.08	359.2	POS										3.54851e-07	2.46235e-07	2.40049e-07	2.80378e-07	9.83473e-08	1.86741e-07	9.02489e-08	1.25113e-07	1.33199	0.0326982	0.221282	0.446228	-1.16415
2465			level4			323.123	359.2	POS										8.21764e-07	6.04976e-07	1.1295e-06	8.52082e-07	3.62709e-07	2.97576e-07	7.77839e-08	2.46023e-07	1.25305	0.0256922	0.203498	0.288732	-1.7922
2472			level4			365.104	359.2	POS										6.17559e-06	3.59288e-06	5.50737e-06	5.09194e-06	1.05155e-06	1.38447e-06	1.24128e-06	1.22577e-06	1.50356	0.0360578	0.228659	0.240727	-2.05453
2474			level4			367.149	359.2	POS										3.74441e-07	2.24544e-07	2.9956e-07	2.99515e-07	2.38022e-08	1.36689e-07	6.87412e-08	7.64109e-08	1.2959	0.0147524	0.168824	0.255115	-1.97078
2475			level4			374.062	359.2	POS										6.73315e-07	6.63386e-07	5.88787e-07	6.41829e-07	1.61919e-07	3.31843e-07	9.01734e-08	1.94645e-07	1.36173	0.00426326	0.114739	0.303266	-1.72134
2477			level4			436.222	359.2	POS										7.82731e-06	1.41181e-05	8.41587e-06	1.01204e-05	1.69862e-05	2.17673e-05	1.87812e-05	1.91782e-05	1.32627	0.0206978	0.189099	1.895	0.9222
2478			level4	Azocyclotin	-9.80372379194256	437.225	359.2	POS										1.91225e-06	3.63368e-06	2.15346e-06	2.56647e-06	3.98178e-06	5.62938e-06	4.59358e-06	4.73492e-06	1.26932	0.0397531	0.235588	1.84492	0.883555
2482			level4			504.252	359.2	POS										4.70521e-06	3.34031e-06	3.43474e-06	3.82675e-06	1.0888e-06	2.239e-06	1.3096e-06	1.5458e-06	1.39034	0.0155301	0.171944	0.403945	-1.30777
2485			level4			611.158	359.2	POS										1.44046e-07	1.70875e-07	1.13576e-07	1.42832e-07	1.97108e-07	2.54993e-07	2.77653e-07	2.43251e-07	1.33303	0.0261439	0.204615	1.70306	0.768128
2488			level4			698.186	359.2	POS										5.44078e-09	1.64369e-07	2.20894e-07	1.30235e-07	6.49611e-07	3.976e-07	4.32652e-07	4.93288e-07	1.03258	0.0234814	0.197135	3.78769	1.92132
2496			level4			503.249	358.9	POS										2.13853e-05	1.41716e-05	1.43018e-05	1.66196e-05	6.09234e-06	1.01225e-05	5.90284e-06	7.37258e-06	1.37855	0.0282995	0.210217	0.443609	-1.17264
2505			level4			289.106	358.5	POS										4.4581e-06	4.31361e-06	3.66624e-06	4.14598e-06	2.40249e-06	2.76758e-06	2.44758e-06	2.53922e-06	1.49589	0.00395943	0.112629	0.612452	-0.70733
2509			level4			1092.56	358.5	POS										5.44078e-09	5.69788e-09	6.14832e-09	5.76233e-09	6.85906e-09	6.19632e-09	6.61583e-09	6.55707e-09	1.27832	0.048516	0.237455	1.13792	0.1864
2527			level4			348.959	357.9	POS										1.44274e-06	2.10272e-06	1.70035e-06	1.7486e-06	3.42967e-06	2.46266e-06	2.81088e-06	2.90107e-06	1.3504	0.028002	0.209745	1.65908	0.730382
2529			level4			438.237	357.9	POS										9.15346e-06	8.02187e-06	4.10914e-06	7.09482e-06	1.3603e-05	1.12786e-05	1.77718e-05	1.42178e-05	1.22948	0.0431659	0.237455	2.00397	1.00286
2532			level4			599.427	357.9	POS										1.12353e-05	2.54135e-05	1.80994e-05	1.82494e-05	4.7367e-05	3.73289e-05	3.1972e-05	3.88893e-05	1.29489	0.0275849	0.208575	2.13099	1.09153
2534			level4			1092.06	357.9	POS										5.44078e-09	5.69788e-09	6.14832e-09	5.76233e-09	6.85906e-09	6.19632e-09	6.61583e-09	6.55707e-09	1.27832	0.048516	0.237455	1.13792	0.1864
2536			level4			600.43	357.7	POS										4.22916e-06	9.49788e-06	6.52878e-06	6.75194e-06	1.81974e-05	1.30868e-05	1.19441e-05	1.44095e-05	1.28841	0.0355091	0.227238	2.13412	1.09364
2539			level4			360.068	357.5	POS										9.53445e-07	4.57202e-07	6.64992e-07	6.9188e-07	2.49329e-07	2.37384e-07	1.22429e-07	2.03047e-07	1.38744	0.0307713	0.21679	0.293472	-1.76871
2540			level4			437.149	357.5	POS										2.23103e-06	8.47103e-07	1.20443e-06	1.42752e-06	2.88535e-06	4.42251e-06	3.151e-06	3.48628e-06	1.30524	0.0308695	0.217113	2.4422	1.28818
2555			level4			959.568	357.3	POS										1.19851e-06	7.19863e-07	1.29199e-06	1.07012e-06	6.85906e-09	6.19632e-09	6.61583e-09	6.55707e-09	1.55082	0.0266529	0.206091	0.00612741	-7.35051
2556			level4			960.572	357.3	POS										5.44078e-09	5.69788e-09	6.14832e-09	5.76233e-09	6.85906e-09	6.19632e-09	6.61583e-09	6.55707e-09	1.27832	0.048516	0.237455	1.13792	0.1864
2567			level4			741.438	357.2	POS										3.36603e-07	1.45599e-06	1.03235e-06	9.41648e-07	2.20546e-06	2.0769e-06	2.50677e-06	2.26304e-06	1.18062	0.0195661	0.18507	2.40328	1.265
2582			level4			1175.86	356.8	POS										5.28639e-07	1.45428e-06	6.17963e-07	8.66959e-07	3.17395e-06	2.32258e-06	1.64972e-06	2.38208e-06	1.27784	0.0461047	0.237455	2.74763	1.45819
2595			level4			526.141	356.6	POS										5.38271e-06	3.20366e-06	4.96931e-06	4.51856e-06	3.82206e-07	1.12874e-06	6.06833e-07	7.05925e-07	1.46338	0.00562829	0.125033	0.156228	-2.67828
2607			level4			797.515	356.6	POS										5.62719e-06	5.29828e-06	4.571e-06	5.16549e-06	1.80301e-06	1.10023e-06	6.39121e-07	1.18079e-06	1.45176	0.000979635	0.078246	0.228592	-2.12916
2608			level4			798.52	356.6	POS										2.37319e-06	2.2106e-06	3.34972e-06	2.6445e-06	3.5297e-07	6.75672e-07	2.41716e-07	4.23452e-07	1.47462	0.00422281	0.114407	0.160126	-2.64272
2609			level4			799.525	356.6	POS										5.50865e-07	8.61335e-07	1.27687e-06	8.96357e-07	4.04419e-07	2.20556e-07	6.61583e-09	2.1053e-07	1.0368	0.0458591	0.237455	0.234873	-2.09005
2610			level4			961.581	356.6	POS										3.15987e-07	4.69277e-07	5.83258e-07	4.56174e-07	9.60602e-08	6.19632e-09	1.37238e-07	7.98316e-08	1.17035	0.0121783	0.159229	0.175002	-2.51455
2613			level4			225.208	356.5	POS										2.45631e-06	2.31362e-06	2.90196e-06	2.5573e-06	3.01018e-06	3.24698e-06	3.73667e-06	3.33128e-06	1.2878	0.0494912	0.239517	1.30265	0.381454
2615			level4	Avenanthramide C	-4.04913132076619	316.284	356.5	POS										6.00404e-06	9.58204e-06	1.06195e-05	8.73518e-06	2.21962e-05	1.38376e-05	2.0201e-05	1.87449e-05	1.349	0.0255132	0.20296	2.14591	1.10159
2618			level4	Stavudine triphosphate	10.1764077284789	465.164	356.5	POS										1.45331e-06	9.89354e-07	1.04342e-06	1.16203e-06	3.70111e-07	4.72479e-07	4.0567e-07	4.16087e-07	1.50258	0.00754897	0.137109	0.358069	-1.48169
2642			level4	(6-Aminoquinolin-2-yl) N-(2,5-dihydroxypyrrol-1-yl)-N-hydroxycarbamate	20.6258517166873	317.287	356	POS										8.65127e-07	1.48889e-06	1.50145e-06	1.28516e-06	3.4766e-06	2.12776e-06	3.72679e-06	3.11038e-06	1.35705	0.0276537	0.208686	2.42024	1.27515
2644			level4			556.103	356	POS										2.16316e-06	2.27219e-06	3.87254e-06	2.7693e-06	1.56514e-07	1.23902e-06	5.34866e-07	6.43468e-07	1.26374	0.028922	0.211672	0.232358	-2.10558
2650			level4			791.48	356	POS										1.06936e-07	2.75347e-07	8.29369e-08	1.55073e-07	1.88525e-06	8.32478e-07	9.64468e-07	1.2274e-06	1.43293	0.0333553	0.222838	7.91496	2.98458
2651			level4			923.569	356	POS										5.44078e-09	5.69788e-09	6.14832e-09	5.76233e-09	6.85906e-09	6.19632e-09	6.61583e-09	6.55707e-09	1.27832	0.048516	0.237455	1.13792	0.1864
2677			level4	TG(24:1(15Z)/22:6(4Z,7Z,10Z,13Z,16Z,19Z)/22:6(4Z,7Z,10Z,13Z,16Z,19Z))	11.1365950467819	1062.69	355.9	POS										5.44078e-09	5.69788e-09	6.14832e-09	5.76233e-09	6.85906e-09	6.19632e-09	6.61583e-09	6.55707e-09	1.27832	0.048516	0.237455	1.13792	0.1864
2689			level4			82.0135	355.4	POS										6.68196e-07	8.23872e-07	9.00643e-07	7.9757e-07	6.03016e-08	1.20896e-07	1.19987e-07	1.00395e-07	1.51656	0.000611547	0.0673426	0.125876	-2.98993
2691			level4			1061.69	355.4	POS										5.44078e-09	5.69788e-09	6.14832e-09	5.76233e-09	6.85906e-09	6.19632e-09	6.61583e-09	6.55707e-09	1.27832	0.048516	0.237455	1.13792	0.1864
2694			level4			178.122	355.3	POS										2.14984e-06	2.48667e-06	3.14569e-06	2.59407e-06	3.973e-06	4.14344e-06	3.22206e-06	3.7795e-06	1.27456	0.043557	0.237455	1.45698	0.542981
2700			level4			767.616	355.3	POS										5.44078e-09	5.69788e-09	6.14832e-09	5.76233e-09	6.85906e-09	6.19632e-09	6.61583e-09	6.55707e-09	1.27832	0.048516	0.237455	1.13792	0.1864
2719			level4	IMP	2.07750584415502	349.214	355.2	POS										2.09195e-06	2.22483e-06	1.38858e-06	1.90179e-06	4.18647e-06	2.85945e-06	3.29368e-06	3.44653e-06	1.32018	0.0300995	0.214983	1.81226	0.85779
2727			level4			73.5315	355	POS										6.56985e-06	1.00021e-05	9.84397e-06	8.80532e-06	2.74539e-06	1.75783e-06	3.80528e-06	2.7695e-06	1.4181	0.00883751	0.143456	0.314526	-1.66875
2729			level4			152.037	354.8	POS										3.84781e-06	2.54732e-06	3.40881e-06	3.26798e-06	8.27053e-08	1.19019e-06	6.8203e-07	6.51641e-07	1.2234	0.00629657	0.129633	0.199402	-2.32625
2733			level4	TG(20:0/22:4(7Z,10Z,13Z,16Z)/O-18:0)	-12.0348232411406	954.612	354.7	POS										4.71273e-06	5.88301e-06	5.2628e-06	5.28618e-06	3.01872e-06	1.81048e-06	1.26941e-06	2.03287e-06	1.38802	0.00622814	0.129254	0.384563	-1.37871
2738			level4			168.149	354.6	POS										6.49694e-06	6.03675e-06	5.99601e-06	6.17657e-06	7.45537e-06	7.54267e-06	8.52129e-06	7.83978e-06	1.43772	0.0116441	0.156923	1.26928	0.344007
2742			level4	(2-Methylphenyl) Dihydrogen Phosphate	-20.0755904507732	189.123	354.6	POS										1.61432e-06	2.35531e-06	1.97058e-06	1.98007e-06	2.63926e-06	2.57123e-06	2.7718e-06	2.66076e-06	1.25543	0.0373883	0.231484	1.34377	0.426289
2748			level4			88.1118	354.5	POS										0.00106604	0.00110075	0.00127835	0.00114838	0.00174171	0.00137717	0.00149548	0.00153812	1.33993	0.0363797	0.229438	1.33938	0.421569
2750			level4	5-Aminolevulite	4.75406448105996	132.138	354.5	POS										3.37127e-06	3.80136e-06	2.91201e-06	3.36155e-06	6.33537e-06	4.91688e-06	4.53624e-06	5.26283e-06	1.34502	0.0346986	0.225648	1.5656	0.646712
2751			level4			152.143	354.5	POS										5.47392e-06	5.09465e-06	5.2714e-06	5.27999e-06	7.24795e-06	6.9171e-06	6.40773e-06	6.85759e-06	1.48389	0.00415253	0.114136	1.29879	0.377168
2752			level4			157.133	354.5	POS										2.67713e-06	2.49521e-06	2.75011e-06	2.64082e-06	2.97872e-06	3.5899e-06	3.72497e-06	3.4312e-06	1.34887	0.0308108	0.216913	1.29929	0.377727
2758			level4			91.0446	354.3	POS										9.43218e-07	1.05477e-06	1.27337e-06	1.09045e-06	9.95553e-08	2.89682e-07	3.96021e-07	2.61753e-07	1.36696	0.00311335	0.106527	0.24004	-2.05865
2761			level4	N,N'-Dimethylurea	-6.54421144865028	89.1151	354.1	POS										6.69184e-05	6.9426e-05	6.72737e-05	6.78727e-05	9.2034e-05	7.91878e-05	8.27641e-05	8.4662e-05	1.43707	0.0126758	0.160949	1.24736	0.318882
2764			level4	NS 1619	-11.5303514431318	363.23	354	POS										9.08869e-06	1.0203e-05	7.21765e-06	8.83646e-06	2.16493e-05	1.74605e-05	1.97852e-05	1.96317e-05	1.48851	0.0019371	0.0932974	2.22167	1.15164
2765			level4	GMP	10.2510705615612	364.232	354	POS										1.6745e-06	2.14457e-06	1.1824e-06	1.66716e-06	5.07761e-06	3.86644e-06	4.55792e-06	4.50065e-06	1.45216	0.00318371	0.106958	2.6996	1.43275
2770			level4			82.5368	353.9	POS										3.68871e-05	3.76735e-05	5.05537e-05	4.17048e-05	2.19027e-05	9.85441e-06	1.76191e-05	1.64588e-05	1.36319	0.0111718	0.154775	0.394649	-1.34136
2771			level4			83.5356	353.9	POS										4.87047e-06	4.97889e-06	5.72878e-06	5.19271e-06	2.38743e-06	1.3476e-06	2.61166e-06	2.11556e-06	1.4076	0.00289813	0.104021	0.40741	-1.29545
2783			level4	Maculosine	7.61620185914751	332.33	353.9	POS										5.44078e-09	9.16308e-08	3.90099e-08	4.53605e-08	3.07392e-05	1.93837e-05	1.87907e-05	2.29712e-05	1.50789	0.027569	0.208575	506.414	8.98417
2785			level4			594.471	353.9	POS										1.08566e-06	2.08267e-06	2.18676e-06	1.78503e-06	2.81596e-06	3.20186e-06	2.9138e-06	2.97721e-06	1.20242	0.0321075	0.220108	1.66787	0.738011
2797			level4			94.0446	353.4	POS										1.67319e-05	1.83896e-05	2.1496e-05	1.88725e-05	1.08154e-05	5.68135e-06	8.09144e-06	8.19605e-06	1.40465	0.00633378	0.129807	0.434286	-1.20328
2798			level4			606.381	353.4	POS										5.44078e-09	8.54768e-07	6.14832e-09	2.88786e-07	1.24795e-06	1.01874e-06	1.54998e-06	1.27222e-06	1.14419	0.0379099	0.232559	4.40543	2.13928
2802			level4	Hhcfu	5.94077522092664	274.273	353.3	POS										4.78331e-06	5.50993e-06	5.38562e-06	5.22629e-06	7.07154e-06	6.40052e-06	8.97151e-06	7.48119e-06	1.32677	0.0482304	0.237455	1.43145	0.517482
2816			level4	71-hydroxychlorophyll a	-11.9720286493471	909.497	353.2	POS										3.8597e-06	7.49476e-06	6.42253e-06	5.92566e-06	9.40374e-06	1.40173e-05	1.80915e-05	1.38375e-05	1.30371	0.0442686	0.237455	2.33518	1.22353
2824			level4			749.472	352.7	POS										2.95889e-06	4.15407e-06	3.31715e-06	3.4767e-06	8.7439e-06	5.75683e-06	5.62082e-06	6.70718e-06	1.367	0.0401685	0.23628	1.92918	0.947987
2834			level4			671.557	352.6	POS										5.44078e-09	5.69788e-09	6.14832e-09	5.76233e-09	2.96934e-07	2.41348e-07	1.57691e-07	2.31991e-07	1.54828	0.030536	0.216224	40.2599	5.33127
2840			level4			718.536	352.6	POS										8.69454e-06	6.77318e-06	5.9822e-06	7.14997e-06	1.38104e-05	2.14511e-05	1.77195e-05	1.76603e-05	1.45292	0.011026	0.154096	2.46998	1.3045
2852			level4			83.6267	352.1	POS										5.44078e-09	5.69788e-09	6.14832e-09	5.76233e-09	6.85906e-09	6.19632e-09	6.61583e-09	6.55707e-09	1.27832	0.048516	0.237455	1.13792	0.1864
2856			level4			738.621	352.1	POS										5.44078e-09	2.39447e-07	6.14832e-09	8.36788e-08	4.01236e-07	4.98666e-07	6.9395e-07	5.31284e-07	1.22148	0.0182036	0.180169	6.34909	2.66655
2864			level4			663.489	352	POS										3.34687e-06	6.07491e-06	4.24337e-06	4.55505e-06	2.0464e-05	1.29311e-05	2.20121e-05	1.8469e-05	1.47331	0.00884502	0.143456	4.05463	2.01957
2866			level4			737.61	352	POS										5.44078e-09	5.69788e-09	6.14832e-09	5.76233e-09	1.95442e-07	2.90119e-07	3.70649e-07	2.85403e-07	1.54974	0.0312531	0.217989	49.5292	5.63021
2873			level4	Tetracenomycin D3	5.32047346267156	381.314	351.9	POS										3.29135e-07	8.17313e-07	8.53502e-08	4.10599e-07	4.72471e-06	3.6436e-06	6.0314e-06	4.7999e-06	1.39473	0.00372024	0.111827	11.69	3.5472
2874			level4			420.354	351.9	POS										5.44078e-09	5.69788e-09	6.14832e-09	5.76233e-09	6.85906e-09	6.19632e-09	6.61583e-09	6.55707e-09	1.27832	0.048516	0.237455	1.13792	0.1864
2880			level4	Dieckol	-19.8996975302685	743.547	351.9	POS										7.83125e-07	2.86448e-06	2.29714e-06	1.98158e-06	6.62293e-06	6.8299e-06	8.26871e-06	7.24051e-06	1.35223	0.00288324	0.103946	3.6539	1.86944
2881			level4			856.647	351.9	POS										9.63246e-07	1.29328e-06	1.15642e-06	1.13765e-06	4.20433e-06	2.90334e-06	5.13353e-06	4.0804e-06	1.49477	0.042448	0.237455	3.5867	1.84266
2884			level4	Tricrozarin A	16.0543169811227	295.226	351.7	POS										4.62168e-06	8.13824e-06	4.40251e-06	5.72081e-06	2.08251e-05	2.39953e-05	2.1995e-05	2.22718e-05	1.48912	0.000407664	0.0593892	3.89312	1.96093
2888			level4	(6S)-6beta-Hydroxy-1,4,5,6-tetrahydronicotimide-adenine dinucleotide	1.49738907960644	684.465	351.6	POS										1.13676e-05	1.26654e-05	1.15968e-05	1.18766e-05	1.27805e-06	2.78475e-06	2.78982e-06	2.2842e-06	1.49077	0.000117358	0.0482853	0.192328	-2.37836
2896			level4	4-Nitrophenyl methylphenylphosphinate	-17.5913367195455	278.218	351.4	POS										3.28143e-07	1.09922e-06	3.24257e-07	5.83873e-07	1.8453e-06	2.76223e-06	3.46855e-06	2.69203e-06	1.3652	0.0170495	0.176279	4.61064	2.20497
2897			level4	Chlorohaloperidol	-5.03823409455975	393.325	351.4	POS										2.13324e-06	1.14996e-05	9.50068e-06	7.71118e-06	3.28124e-05	2.89555e-05	4.3697e-05	3.51549e-05	1.31657	0.00640756	0.13056	4.55896	2.1887
2904			level4			696.611	351.4	POS										2.0301e-07	1.00683e-06	4.09496e-07	5.39778e-07	2.6261e-06	1.89436e-06	3.53961e-06	2.68669e-06	1.35629	0.0158048	0.173201	4.9774	2.31539
2918			level4			393.314	351.3	POS										2.25749e-06	1.38733e-05	1.11425e-05	9.09108e-06	4.99203e-05	3.35013e-05	6.34094e-05	4.89437e-05	1.3181	0.012942	0.162125	5.3837	2.4286
2919			level4	6-Methylthioguanosine monophosphate	-7.82227275589753	394.317	351.3	POS										2.21106e-07	4.31278e-06	2.93498e-06	2.48962e-06	1.43233e-05	1.02066e-05	1.8455e-05	1.43283e-05	1.19967	0.0113472	0.155845	5.75521	2.52487
2925			level4			745.554	351.3	POS										2.77015e-06	1.16971e-06	1.26844e-06	1.7361e-06	5.20181e-06	5.67741e-06	8.02704e-06	6.30209e-06	1.42071	0.0108461	0.1529	3.63003	1.85998
2927			level4			769.663	351.3	POS										5.44078e-09	5.69788e-09	6.14832e-09	5.76233e-09	6.85906e-09	6.19632e-09	6.61583e-09	6.55707e-09	1.27832	0.048516	0.237455	1.13792	0.1864
2929			level4			794.675	351.3	POS										5.44078e-09	5.69788e-09	6.14832e-09	5.76233e-09	6.85906e-09	6.19632e-09	6.61583e-09	6.55707e-09	1.27832	0.048516	0.237455	1.13792	0.1864
2931			level4			840.652	351.3	POS										5.34611e-06	2.14167e-06	2.59051e-06	3.35943e-06	1.04897e-05	1.078e-05	1.19087e-05	1.10595e-05	1.42571	0.00212746	0.0951383	3.29207	1.71899
2939			level4	Clofazimine glucuronide	13.408162038814	666.536	351.2	POS										3.13798e-06	3.73148e-06	2.5105e-06	3.12665e-06	5.98825e-06	4.76624e-06	5.57121e-06	5.4419e-06	1.40129	0.0100008	0.148879	1.74049	0.79949
2940			level4	(3''-Apiosyl-6''-malonyl)astragalin	-8.66657654904809	667.539	351.2	POS										3.27873e-07	5.21709e-07	6.14832e-09	2.85243e-07	1.77405e-06	9.37155e-07	2.1139e-06	1.60837e-06	1.05466	0.0254361	0.202738	5.63859	2.49533
2946			level4			764.606	351.1	POS										2.79023e-05	3.15481e-05	3.2982e-05	3.08108e-05	7.71212e-05	4.99279e-05	6.60656e-05	6.43716e-05	1.46199	0.013978	0.165827	2.08925	1.06299
2949			level4			391.319	350.9	POS										2.55651e-06	2.85704e-06	3.26672e-06	2.89342e-06	5.49383e-06	4.29978e-06	6.04732e-06	5.28031e-06	1.44625	0.0126544	0.160949	1.82494	0.867845
2974			level4			682.559	350.6	POS										2.45756e-06	7.12655e-06	5.77711e-06	5.12041e-06	1.677e-05	8.60531e-06	1.85212e-05	1.46322e-05	1.25436	0.0471293	0.237455	2.85762	1.51481
2975			level4			683.563	350.6	POS										4.11419e-07	2.19887e-06	1.30124e-06	1.30384e-06	6.89557e-06	3.5252e-06	7.9569e-06	6.12589e-06	1.30454	0.0281208	0.210019	4.69834	2.23215
2986			level4	Pelargonidin 3-O-beta-D-sambubioside	20.3773615603269	566.519	350.4	POS										6.37889e-07	1.13588e-06	1.00772e-07	6.24847e-07	2.60471e-06	2.63353e-06	4.45832e-06	3.23219e-06	1.23438	0.0187371	0.18183	5.17277	2.37094
2993			level4			466.41	350.1	POS										5.44078e-09	5.69788e-09	6.14832e-09	5.76233e-09	9.26519e-07	7.41065e-07	1.18353e-06	9.50372e-07	1.55553	0.0179483	0.179257	164.928	7.3657
3016			level4			763.553	349.8	POS										1.80764e-06	1.18537e-06	2.03328e-06	1.67543e-06	3.67657e-06	5.83805e-06	8.24849e-06	5.92104e-06	1.41906	0.0342635	0.224651	3.53404	1.82132
3022			level4	(6S)-6beta-Hydroxy-1,4,5,6-tetrahydronicotimide-adenine dinucleotide	-8.15940975310396	684.458	349.7	POS										8.3726e-06	7.63651e-06	7.67161e-06	7.89357e-06	1.4479e-06	3.40516e-06	2.59364e-06	2.48223e-06	1.44042	0.00092772	0.0772784	0.314463	-1.66904
3027			level4			694.559	349.6	POS										4.23082e-07	1.15669e-06	2.67021e-06	1.41666e-06	3.44415e-06	3.66788e-06	5.14043e-06	4.08415e-06	1.20104	0.0347828	0.225787	2.88295	1.52754
3029			level4	Dimethylaminoethyl reserpilite dihydrochloride	24.0064841139865	543.515	349.5	POS										5.44078e-09	4.27016e-07	6.14832e-09	1.46202e-07	1.23393e-06	1.40359e-06	2.37311e-06	1.67021e-06	1.26939	0.016217	0.17423	11.424	3.514
3031			level4			804.641	349.5	POS										3.11799e-06	2.08075e-06	2.57995e-06	2.5929e-06	5.21796e-06	4.89222e-06	3.3677e-06	4.49262e-06	1.30094	0.0419993	0.237455	1.73267	0.792994
3037			level4			796.663	349.4	POS										5.44078e-09	5.69788e-09	6.14832e-09	5.76233e-09	6.85906e-09	6.19632e-09	6.61583e-09	6.55707e-09	1.27832	0.048516	0.237455	1.13792	0.1864
3040			level4	PG(a-25:0/18:1(12Z)-2OH(9,10))	-14.0826068793195	908.255	349.4	POS										3.17656e-06	2.61662e-06	4.52319e-06	3.43879e-06	5.70341e-06	6.02521e-06	9.22012e-06	6.98291e-06	1.33533	0.0478502	0.237455	2.03063	1.02193
3050			level4			465.408	349.3	POS										2.26769e-07	9.71553e-07	5.41045e-07	5.79789e-07	4.894e-06	3.73462e-06	7.33653e-06	5.32172e-06	1.44572	0.011899	0.15827	9.17872	3.19829
3051			level4			483.418	349.3	POS										1.4749e-06	7.43917e-06	3.03205e-06	3.98204e-06	1.86316e-05	1.36646e-05	2.87523e-05	2.03495e-05	1.34778	0.0267687	0.206277	5.11032	2.35341
3053			level4			744.487	349.3	POS										3.6292e-06	3.17763e-06	1.83773e-06	2.88152e-06	1.13621e-05	1.12597e-05	9.94843e-06	1.08567e-05	1.48	0.000347336	0.0568472	3.76772	1.91369
3064			level4			738.585	349	POS										5.44078e-09	5.69788e-09	1.23066e-07	4.47349e-08	7.87762e-07	5.43007e-07	4.24142e-07	5.8497e-07	1.35561	0.00904024	0.144388	13.0764	3.70889
3073			level4			610.182	348.8	POS										9.2315e-06	1.12984e-05	1.22249e-05	1.09183e-05	1.93048e-05	2.36336e-05	2.06014e-05	2.11799e-05	1.48703	0.00275301	0.103357	1.93986	0.955956
3074			level4			611.182	348.8	POS										6.45989e-06	8.28837e-06	8.13529e-06	7.62785e-06	1.33775e-05	1.37252e-05	9.40928e-06	1.21706e-05	1.30909	0.0390762	0.234614	1.59555	0.674058
3075			level4			612.18	348.8	POS										2.86523e-06	4.17285e-06	4.51546e-06	3.85118e-06	8.01801e-06	9.34393e-06	1.13227e-05	9.56155e-06	1.45987	0.00621808	0.129242	2.48276	1.31194
3088			level4			97.0645	348.7	POS										7.8654e-06	7.69884e-06	8.71539e-06	8.09321e-06	1.55623e-05	1.08181e-05	1.13233e-05	1.25679e-05	1.36366	0.0436092	0.237455	1.55289	0.63496
3090			level4			620.428	348.7	POS										3.6999e-07	1.19281e-06	4.6033e-07	6.74377e-07	6.53871e-06	3.96675e-06	5.37425e-06	5.29323e-06	1.46256	0.00422655	0.114417	7.84907	2.97252
3091			level4			658.539	348.7	POS										1.31489e-06	2.5961e-06	2.4634e-06	2.1248e-06	4.81857e-06	7.11975e-06	3.89313e-06	5.27715e-06	1.32358	0.0389526	0.234337	2.4836	1.31243
3095			level4			1194.81	348.7	POS										3.27325e-06	3.61207e-06	3.72719e-06	3.5375e-06	1.66033e-06	1.75764e-06	1.96972e-06	1.7959e-06	1.52853	0.000445404	0.0609327	0.507673	-0.978027
3096			level4			1195.82	348.7	POS										2.59432e-06	2.27884e-06	2.62321e-06	2.49879e-06	1.55347e-06	1.0811e-06	1.4436e-06	1.35939e-06	1.44395	0.00321203	0.107184	0.544021	-0.878267
3099			level4			433.33	348.6	POS										1.92345e-06	2.50315e-06	3.8562e-06	2.76093e-06	7.12746e-06	1.42557e-05	9.21883e-06	1.02007e-05	1.42652	0.027413	0.208014	3.69464	1.88544
3100			level4	Salviaflaside methyl ester	-7.22596471064946	537.485	348.6	POS										2.97359e-07	7.12555e-08	1.42351e-07	1.70322e-07	1.27135e-06	8.32735e-07	1.06398e-06	1.05602e-06	1.43301	0.00347164	0.110226	6.20015	2.6323
3111			level4	PE(24:1(15Z)/22:6(5Z,8E,10Z,13Z,15E,19Z)-2OH(7S, 17S))	15.1432960067835	907.257	348.5	POS										2.59122e-06	2.79786e-06	2.8365e-06	2.74186e-06	5.05946e-06	5.22691e-06	5.09528e-06	5.12722e-06	1.54975	1.29152e-05	0.0254659	1.86998	0.903022
3114			level4			117.415	348.4	POS										5.44078e-09	5.69788e-09	6.14832e-09	5.76233e-09	6.85906e-09	6.19632e-09	6.61583e-09	6.55707e-09	1.27832	0.048516	0.237455	1.13792	0.1864
3116			level4			682.629	348.4	POS										2.25291e-06	5.18813e-06	4.42172e-06	3.95425e-06	1.05734e-05	6.77878e-06	1.10215e-05	9.45788e-06	1.30338	0.0266835	0.206091	2.39182	1.25811
3122			level4	Chlorosulfonic acid	-5.80672845855962	117.527	348.2	POS										5.44078e-09	5.69788e-09	6.14832e-09	5.76233e-09	6.85906e-09	6.19632e-09	6.61583e-09	6.55707e-09	1.27832	0.048516	0.237455	1.13792	0.1864
3136			level4			694.632	348.1	POS										1.29999e-06	3.65428e-06	2.42977e-06	2.46135e-06	4.71423e-06	4.74086e-06	4.02026e-06	4.49178e-06	1.15418	0.0477437	0.237455	1.82493	0.867841
3153			level4	2,3-Bis-[2-methoxy-4-nitro-5-sulfophenyl]-2h-tetrazole-5-carboxanilide	2.94300359593507	654.559	348	POS										1.19216e-05	9.24476e-06	1.3966e-05	1.17108e-05	1.3765e-06	3.90246e-06	3.83516e-06	3.03804e-06	1.38718	0.00561204	0.124916	0.259423	-1.94662
3171			level4			874.782	347.9	POS										9.98152e-07	1.23007e-06	8.43338e-08	7.7085e-07	1.59414e-06	2.9404e-06	2.48209e-06	2.33888e-06	1.01946	0.0410862	0.237455	3.03415	1.60129
3176			level4			804.607	347.8	POS										2.09513e-06	1.51315e-06	2.26928e-06	1.95918e-06	2.9068e-06	3.32472e-06	3.66551e-06	3.29901e-06	1.38513	0.0133868	0.163646	1.68387	0.75178
3180			level4	DG(22:4(7Z,10Z,13Z,16Z)/24:0/0:0)	-10.9302448428872	758.219	347.7	POS										7.71374e-06	1.00669e-05	9.96763e-06	9.24943e-06	1.63584e-05	1.70174e-05	1.60937e-05	1.64898e-05	1.48907	0.000891105	0.0758697	1.78279	0.834139
3188			level4			759.519	347.6	POS										5.44078e-09	3.42586e-07	1.09824e-06	4.82089e-07	5.3967e-06	2.80928e-06	3.34393e-06	3.84997e-06	1.12708	0.0167922	0.175806	7.98601	2.99748
3192			level4	N-Acetyl-N6,O-didemethylpuromycin-5'-phosphate	-7.38602904106301	566.476	347.5	POS										1.70233e-06	1.5498e-06	2.35356e-07	1.1625e-06	3.33835e-06	4.60386e-06	8.1035e-06	5.34857e-06	1.21246	0.0492045	0.238832	4.60094	2.20193
3200			level4			896.766	347.5	POS										4.04457e-07	2.83977e-07	3.21655e-07	3.36697e-07	7.53556e-07	8.00112e-07	1.22803e-06	9.27233e-07	1.46367	0.0189953	0.182888	2.75391	1.46148
3218			level4			554.512	347.3	POS										3.79964e-05	6.78244e-05	4.36151e-05	4.9812e-05	7.57897e-05	0.000103223	8.736e-05	8.8791e-05	1.29202	0.0324269	0.220848	1.78252	0.833922
3221			level4			653.586	347.3	POS										7.56019e-07	2.45248e-06	1.08398e-06	1.43083e-06	3.19785e-06	4.27196e-06	6.66681e-06	4.71221e-06	1.30349	0.0461706	0.237455	3.29335	1.71955
3230			level4			804.551	347.3	POS										3.15746e-06	2.01383e-06	2.80353e-06	2.65827e-06	8.55949e-06	8.01317e-06	1.40741e-05	1.02156e-05	1.48243	0.0183652	0.180599	3.84294	1.94221
3231			level4			805.554	347.3	POS										7.83699e-07	9.96031e-07	5.25347e-07	7.68359e-07	3.74383e-06	3.68601e-06	5.87672e-06	4.43552e-06	1.49822	0.00749396	0.137109	5.77272	2.52925
3279			level4	3-O-alpha-L-Arabinopyranosylproanthocyanidin A5'	-19.8648356873765	709.612	346.7	POS										8.49435e-07	9.96438e-07	1.42066e-07	6.62646e-07	1.46526e-06	2.97141e-06	2.6253e-06	2.35399e-06	1.15756	0.0324765	0.220904	3.55241	1.8288
3298			level4			848.767	346.4	POS										4.94352e-07	3.75592e-07	3.05482e-07	3.91809e-07	6.24685e-07	7.66974e-07	8.56946e-07	7.49535e-07	1.38388	0.0148441	0.169316	1.91301	0.935847
3301			level4	Primisulfuron	22.0628891611681	455.328	346.3	POS										6.1739e-08	1.54347e-07	1.60323e-07	1.25469e-07	3.71669e-07	2.96286e-07	2.78012e-07	3.15323e-07	1.30743	0.0114571	0.156422	2.51314	1.32949
3306			level4	2-Aminoadenosine	-4.5228445098877	283.262	346.2	POS										5.44078e-09	5.69788e-09	6.14832e-09	5.76233e-09	6.85906e-09	6.19632e-09	6.61583e-09	6.55707e-09	1.27832	0.048516	0.237455	1.13792	0.1864
3309			level4	Temafloxacin	-2.57941722812333	418.387	346.2	POS										5.44078e-09	5.69788e-09	6.14832e-09	5.76233e-09	6.85906e-09	6.19632e-09	6.61583e-09	6.55707e-09	1.27832	0.048516	0.237455	1.13792	0.1864
3311			level4			686.48	346.2	POS										2.10385e-05	1.83171e-05	3.19772e-05	2.37776e-05	5.94908e-06	9.233e-06	1.05033e-05	8.5618e-06	1.40205	0.0256648	0.203394	0.360078	-1.47362
3315			level4			957.631	346.2	POS										7.22111e-06	8.5127e-06	1.0031e-05	8.58827e-06	5.9566e-06	5.55408e-06	3.84645e-06	5.11904e-06	1.31713	0.0287894	0.211254	0.59605	-0.746494
3316			level4			985.676	346.2	POS										5.44078e-09	5.69788e-09	6.14832e-09	5.76233e-09	6.85906e-09	6.19632e-09	6.61583e-09	6.55707e-09	1.27832	0.048516	0.237455	1.13792	0.1864
3326			level4	Triflusulfuron-methyl	3.29671490091436	493.438	346	POS										5.44078e-09	1.28407e-06	5.31273e-07	6.06929e-07	5.98669e-06	2.49076e-06	8.16756e-06	5.54834e-06	1.1022	0.0434079	0.237455	9.14166	3.19246
3328			level4			620.529	346	POS										1.54673e-06	1.07881e-06	2.68835e-06	1.7713e-06	3.17292e-06	2.94136e-06	3.58689e-06	3.23373e-06	1.22653	0.0466086	0.237455	1.82563	0.868391
3335			level4			979.686	346	POS										1.92772e-06	1.05085e-06	1.69618e-06	1.55825e-06	3.56102e-07	6.19632e-09	6.61583e-09	1.22971e-07	1.29706	0.00749336	0.137109	0.0789164	-3.66353
3344			level4			1080.73	345.7	POS										5.44078e-09	5.69788e-09	6.14832e-09	5.76233e-09	6.85906e-09	6.19632e-09	6.61583e-09	6.55707e-09	1.27832	0.048516	0.237455	1.13792	0.1864
3347			level4			812.48	345.6	POS										9.24983e-07	7.82974e-07	4.80607e-07	7.29521e-07	2.30322e-07	6.19632e-09	1.59921e-07	1.32147e-07	1.11754	0.0152302	0.170822	0.181142	-2.46481
3362			level4			947.662	345.5	POS										5.44078e-09	5.69788e-09	6.14832e-09	5.76233e-09	6.85906e-09	6.19632e-09	6.61583e-09	6.55707e-09	1.27832	0.048516	0.237455	1.13792	0.1864
3370			level4			656.545	345.3	POS										1.34927e-07	1.0273e-06	1.25347e-07	4.29191e-07	4.51081e-06	2.08953e-06	2.91093e-06	3.17042e-06	1.33208	0.0237072	0.197464	7.38697	2.88498
3377			level4	Cibarian	-19.5580435677258	383.277	345.2	POS										9.20102e-08	9.00771e-08	6.14832e-09	6.27452e-08	9.54467e-07	6.20608e-07	7.20808e-07	7.65295e-07	1.32279	0.00240494	0.0989746	12.1969	3.60844
3381			level4			931.592	345.1	POS										4.79076e-06	4.29278e-06	5.30911e-06	4.79755e-06	2.88718e-06	9.41095e-07	2.75038e-06	2.19289e-06	1.18509	0.0197426	0.185703	0.457084	-1.12947
3411			level4			690.565	344.7	POS										1.31194e-07	3.51748e-07	2.99751e-07	2.60898e-07	9.48907e-07	1.24194e-06	1.06367e-06	1.08484e-06	1.43308	0.00159419	0.0880105	4.15811	2.05593
3422			level4	sinapoyl-CoA	-11.7320820871905	970.696	344.6	POS										5.44078e-09	5.69788e-09	6.14832e-09	5.76233e-09	6.85906e-09	6.19632e-09	6.61583e-09	6.55707e-09	1.27832	0.048516	0.237455	1.13792	0.1864
3431			level4			818.582	344.4	POS										8.21971e-06	4.18155e-06	7.24814e-06	6.5498e-06	3.39146e-06	2.05854e-06	2.54061e-06	2.66354e-06	1.33892	0.0383464	0.233556	0.406659	-1.29811
3432			level4	TG(18:0/22:2(13Z,16Z)/O-18:0)	14.8703627604937	930.615	344.4	POS										3.10907e-06	3.01087e-06	3.66386e-06	3.26127e-06	1.34646e-06	7.94456e-07	6.82188e-07	9.41035e-07	1.47342	0.00130449	0.0833482	0.288549	-1.79311
3433			level4			88.0626	344.3	POS										2.80455e-05	1.79111e-05	2.1582e-05	2.25129e-05	3.89174e-06	4.83993e-06	1.57447e-06	3.43538e-06	1.46128	0.00360967	0.111484	0.152596	-2.71221
3434			level4			88.1741	344.3	POS										1.3929e-05	7.63804e-06	1.0802e-05	1.07897e-05	1.88853e-06	2.2765e-06	6.49768e-07	1.60493e-06	1.43434	0.0081456	0.140292	0.148747	-2.74907
3437			level4			793.563	344.3	POS										0.000305099	0.000180969	0.000236805	0.000240958	5.54315e-05	6.19895e-05	2.69834e-05	4.81348e-05	1.4639	0.00676078	0.133039	0.199765	-2.32363
3438			level4			819.581	344.3	POS										3.85971e-06	1.75911e-06	4.18294e-06	3.26725e-06	6.03611e-07	6.90459e-07	6.61583e-09	4.33562e-07	1.10119	0.0229907	0.196237	0.132699	-2.91377
3440			level4			454.402	344.2	POS										1.12125e-06	1.36396e-06	6.60594e-07	1.0486e-06	6.85906e-09	6.19632e-09	3.4962e-07	1.20892e-07	1.25631	0.0170532	0.176279	0.115289	-3.11667
3441			level4			792.656	344.2	POS										2.11092e-06	9.69071e-07	1.75817e-06	1.61272e-06	6.85906e-09	6.05609e-08	6.61583e-09	2.46786e-08	1.48264	0.0419861	0.237455	0.0153025	-6.03009
3445			level4	propanoyl-CoA	16.6226191783845	820.591	344.2	POS										1.0265e-05	6.19442e-06	8.16141e-06	8.20696e-06	1.57407e-06	5.34225e-06	1.40575e-06	2.77402e-06	1.27213	0.0355345	0.227238	0.338009	-1.56487
3446			level4			821.594	344.2	POS										4.93423e-06	3.08078e-06	3.71653e-06	3.91052e-06	5.09311e-07	1.67844e-06	1.00292e-06	1.06356e-06	1.37799	0.0113036	0.155553	0.271973	-1.87846
3447			level4			833.597	344.2	POS										2.83425e-06	1.25947e-06	1.8916e-06	1.99511e-06	2.1501e-07	2.37583e-07	6.61583e-09	1.5307e-07	1.26387	0.0164697	0.174977	0.0767226	-3.7042
3459			level4			922.572	344.1	POS										1.14043e-05	1.24582e-05	1.5593e-05	1.31518e-05	9.83899e-06	7.63629e-06	9.03231e-06	8.83586e-06	1.32015	0.0378577	0.232425	0.671837	-0.573816
3460			level4	Morniflumate	-17.1393740737397	396.382	344	POS										3.16664e-06	2.04063e-06	2.53643e-06	2.58123e-06	7.2184e-07	4.79184e-07	8.81775e-07	6.94266e-07	1.47169	0.00550481	0.124624	0.268967	-1.8945
3464			level4			850.553	344	POS										2.33815e-06	2.93297e-06	1.29896e-06	2.19002e-06	8.81283e-07	6.19632e-09	1.28838e-07	3.38773e-07	1.1337	0.0281963	0.21018	0.154689	-2.69256
3466			level4	TG(18:0/22:2(13Z,16Z)/O-18:0)	11.5355735944517	930.612	344	POS										3.80221e-06	3.82616e-06	3.51095e-06	3.71311e-06	1.47766e-06	7.7041e-07	7.59142e-07	1.00241e-06	1.47954	0.00046643	0.0621289	0.269964	-1.88916
3480			level4	Peonidin 3-(6''-malonyl-glucoside) 5-glucoside	1.71922863221366	712.607	343.8	POS										9.03443e-08	3.08536e-07	1.23943e-07	1.74275e-07	1.5154e-06	1.45338e-06	1.27124e-06	1.41334e-06	1.47122	0.0002424	0.0528445	8.10984	3.01967
3494			level4			1099.75	343.6	POS										5.44078e-09	5.69788e-09	6.14832e-09	5.76233e-09	6.85906e-09	6.19632e-09	6.61583e-09	6.55707e-09	1.27832	0.048516	0.237455	1.13792	0.1864
3501			level4			1098.74	343.5	POS										5.44078e-09	5.69788e-09	6.14832e-09	5.76233e-09	6.85906e-09	6.19632e-09	6.61583e-09	6.55707e-09	1.27832	0.048516	0.237455	1.13792	0.1864
3504			level4			505.423	343.4	POS										5.44078e-09	5.69788e-09	9.16452e-08	3.42613e-08	7.95988e-07	2.64676e-07	4.10464e-07	4.90376e-07	1.36276	0.047261	0.237455	14.3128	3.83924
3511			level4			775.532	343.4	POS										2.10134e-06	1.74089e-06	2.25588e-06	2.0327e-06	6.85906e-09	2.49058e-07	6.61583e-09	8.75111e-08	1.37917	0.000353485	0.0568472	0.0430516	-4.53779
3522			level4			681.524	343.2	POS										3.0351e-06	4.12704e-06	4.03382e-06	3.73199e-06	7.58429e-06	5.26576e-06	6.01883e-06	6.28963e-06	1.36258	0.0289923	0.211898	1.68533	0.75303
3535			level4			418.316	343	POS										5.44078e-09	5.69788e-09	6.14832e-09	5.76233e-09	6.85906e-09	6.19632e-09	6.61583e-09	6.55707e-09	1.27832	0.048516	0.237455	1.13792	0.1864
3540			level4			767.547	343	POS										1.17004e-05	7.61957e-06	9.82527e-06	9.71509e-06	4.23476e-06	3.54533e-06	1.52805e-06	3.10271e-06	1.36128	0.00989651	0.148299	0.319371	-1.6467
3553			level4			724.569	342.9	POS										5.29546e-07	2.06815e-06	9.30124e-07	1.17594e-06	2.33681e-06	4.03104e-06	3.07919e-06	3.14902e-06	1.22749	0.0427212	0.237455	2.67787	1.42109
3556			level4			833.605	342.9	POS										1.34277e-06	1.73327e-06	1.55875e-06	1.54493e-06	1.11026e-07	4.5787e-07	6.61583e-09	1.91837e-07	1.22127	0.00157574	0.0878993	0.124172	-3.00959
3563			level4			1106.74	342.9	POS										5.44078e-09	5.69788e-09	6.14832e-09	5.76233e-09	6.85906e-09	6.19632e-09	6.61583e-09	6.55707e-09	1.27832	0.048516	0.237455	1.13792	0.1864
3570			level4			460.367	342.8	POS										3.48849e-07	9.58897e-07	5.25667e-07	6.11138e-07	3.90085e-06	4.10061e-06	4.84354e-06	4.28167e-06	1.48916	0.00041398	0.0599618	7.00606	2.8086
3602			level4	6-CFDA N-succinimidyl ester	-4.98074325466331	558.471	342.5	POS										5.44078e-09	1.45056e-06	2.68197e-07	5.74734e-07	3.87765e-06	2.84159e-06	3.2722e-06	3.33048e-06	1.08574	0.00680732	0.133391	5.79482	2.53476
3616			level4			631.491	342.4	POS										4.25398e-06	1.6172e-05	7.25852e-06	9.22817e-06	3.64996e-05	2.92338e-05	3.48552e-05	3.35295e-05	1.35964	0.00443579	0.115754	3.63339	1.86131
3624			level4			617.347	342.3	POS										5.44078e-09	5.69788e-09	6.14832e-09	5.76233e-09	6.85906e-09	6.19632e-09	6.61583e-09	6.55707e-09	1.27832	0.048516	0.237455	1.13792	0.1864
3633			level4	TG(24:1(15Z)/20:5(5Z,8Z,11Z,14Z,17Z)/24:1(15Z))	-6.40433952086269	1074.74	342.3	POS										5.44078e-09	5.69788e-09	6.14832e-09	5.76233e-09	6.85906e-09	6.19632e-09	6.61583e-09	6.55707e-09	1.27832	0.048516	0.237455	1.13792	0.1864
3638			level4			349.272	342.2	POS										2.6634e-06	5.98689e-06	3.79604e-06	4.14878e-06	1.83999e-05	1.92699e-05	1.88265e-05	1.88321e-05	1.48733	0.000128822	0.0488946	4.53919	2.18244
3639			level4			429.371	342.2	POS										0.000310648	0.00040316	0.00032392	0.000345909	0.00104924	0.000617455	0.000691471	0.000786056	1.41917	0.0320766	0.220108	2.27243	1.18424
3649			level4	Reduced FMN	-6.71219568383908	459.364	342.1	POS										1.16954e-07	1.73305e-06	9.17444e-07	9.22483e-07	9.94342e-06	8.1438e-06	1.1576e-05	9.88773e-06	1.3471	0.00121419	0.0812559	10.7186	3.42204
3652			level4			560.486	342.1	POS										9.08728e-08	6.84109e-07	1.24065e-07	2.99682e-07	5.34241e-06	4.04959e-06	5.11528e-06	4.83576e-06	1.44073	0.000510766	0.0636452	16.1363	4.01224
3671			level4	Valolaginic acid	-9.0418610783755	971.662	342	POS										5.44078e-09	5.69788e-09	6.14832e-09	5.76233e-09	6.85906e-09	6.19632e-09	6.61583e-09	6.55707e-09	1.27832	0.048516	0.237455	1.13792	0.1864
3675			level4			564.4	341.9	POS										8.2633e-07	8.3244e-07	4.66192e-07	7.08321e-07	1.78537e-06	2.00048e-06	3.55234e-06	2.44606e-06	1.4064	0.0380039	0.232762	3.45333	1.78799
3700			level4			127.111	341.6	POS										2.19116e-06	1.96362e-06	2.49025e-06	2.21501e-06	1.61032e-06	1.89611e-06	1.42162e-06	1.64269e-06	1.26281	0.0496407	0.239975	0.741614	-0.431259
3703			level4			233.019	341.6	POS										6.46094e-06	8.76753e-06	8.14976e-06	7.79274e-06	8.55378e-07	1.10898e-06	1.73296e-06	1.23244e-06	1.51311	0.000880469	0.0755632	0.158152	-2.66061
3705			level4			344.227	341.6	POS										3.11884e-05	3.53484e-05	3.43499e-05	3.36289e-05	3.92072e-05	3.75696e-05	4.0547e-05	3.91079e-05	1.35037	0.0227099	0.195198	1.16293	0.21776
3706			level4			388.253	341.6	POS										3.40897e-05	3.93448e-05	4.02124e-05	3.78823e-05	4.77702e-05	4.38272e-05	5.15804e-05	4.77259e-05	1.33917	0.0287462	0.211207	1.25985	0.333249
3707			level4			395.366	341.6	POS										2.1179e-06	6.33695e-06	2.62119e-06	3.69201e-06	1.40934e-05	8.4645e-06	1.48651e-05	1.24743e-05	1.34103	0.0220746	0.193336	3.37874	1.75648
3709			level4			453.247	341.6	POS										5.44078e-09	5.69788e-09	6.14832e-09	5.76233e-09	6.85906e-09	6.19632e-09	6.61583e-09	6.55707e-09	1.27832	0.048516	0.237455	1.13792	0.1864
3721			level4	Relcovaptan (SR-49059)	24.3729250604241	621.522	341.6	POS										1.44795e-07	4.50142e-07	6.2826e-07	4.07732e-07	3.27659e-06	1.65607e-06	3.08975e-06	2.67414e-06	1.40169	0.0129683	0.162125	6.55856	2.71338
3724			level4			879.523	341.6	POS										5.44078e-09	5.69788e-09	6.14832e-09	5.76233e-09	6.85906e-09	6.19632e-09	6.61583e-09	6.55707e-09	1.27832	0.048516	0.237455	1.13792	0.1864
3730			level4			321.241	341.5	POS										2.42694e-06	6.2916e-06	3.39678e-06	4.03844e-06	1.74214e-05	1.22472e-05	1.02594e-05	1.33093e-05	1.37973	0.0188521	0.182189	3.29566	1.72057
3732			level4			489.428	341.5	POS										1.74726e-06	1.05546e-06	4.60326e-07	1.08768e-06	3.78966e-06	2.73533e-06	5.66406e-06	4.06302e-06	1.31557	0.0333213	0.222799	3.73548	1.90129
3745			level4	Cefluprenam	4.89300921690335	557.6	341.4	POS										5.44078e-09	5.69788e-09	6.14832e-09	5.76233e-09	6.85906e-09	6.19632e-09	6.61583e-09	6.55707e-09	1.27832	0.048516	0.237455	1.13792	0.1864
3746			level4	DMG-MINO	0.938673285598694	558.603	341.4	POS										5.44078e-09	5.69788e-09	6.14832e-09	5.76233e-09	6.85906e-09	6.19632e-09	6.61583e-09	6.55707e-09	1.27832	0.048516	0.237455	1.13792	0.1864
3757			level4			1096.72	341.4	POS										5.44078e-09	5.69788e-09	6.14832e-09	5.76233e-09	6.85906e-09	6.19632e-09	6.61583e-09	6.55707e-09	1.27832	0.048516	0.237455	1.13792	0.1864
3760			level4			130.062	341.3	POS										4.57175e-06	4.03343e-06	3.84345e-06	4.14954e-06	2.73121e-06	3.30161e-06	2.93704e-06	2.98996e-06	1.42025	0.013441	0.163782	0.72055	-0.472829
3761			level4	Austalide C	-22.4090484062545	575.611	341.3	POS										5.44078e-09	5.69788e-09	6.14832e-09	5.76233e-09	6.85906e-09	6.19632e-09	6.61583e-09	6.55707e-09	1.27832	0.048516	0.237455	1.13792	0.1864
3768			level4	Mometasone	-22.4086738786583	428.359	341.1	POS										5.2946e-06	2.68452e-05	1.06222e-05	1.4254e-05	6.03734e-05	4.36048e-05	6.63685e-05	5.67822e-05	1.32145	0.0106331	0.152053	3.9836	1.99407
3777			level4			1096.72	341.1	POS										5.44078e-09	5.69788e-09	6.14832e-09	5.76233e-09	6.85906e-09	6.19632e-09	6.61583e-09	6.55707e-09	1.27832	0.048516	0.237455	1.13792	0.1864
3784			level4			528.496	341	POS										9.61637e-07	1.15085e-06	8.18459e-07	9.76982e-07	3.62183e-06	2.88321e-06	4.14201e-06	3.54902e-06	1.51793	0.00242961	0.099285	3.63264	1.86102
3849			level4			582.47	340.4	POS										5.00701e-07	8.78117e-07	3.01127e-07	5.59981e-07	1.36378e-06	9.18407e-07	1.28791e-06	1.19003e-06	1.20548	0.0445872	0.237455	2.12513	1.08755
3851			level4			645.538	340.4	POS										5.8729e-07	1.47803e-06	5.73421e-07	8.7958e-07	3.00671e-06	1.92587e-06	2.50914e-06	2.48057e-06	1.3273	0.020813	0.189417	2.82018	1.49579
3852			level4	Pyranodelphinin A	-17.6679032730151	650.569	340.4	POS										2.70145e-06	2.37399e-06	4.29288e-06	3.12277e-06	8.25956e-06	6.3384e-06	5.09251e-06	6.56349e-06	1.3432	0.0348053	0.225796	2.10181	1.07163
3859			level4	Isochamaejasmin	-10.6483127695815	543.491	340.3	POS										1.59538e-06	7.10654e-06	5.03259e-06	4.57817e-06	1.90383e-05	1.05679e-05	1.73771e-05	1.56611e-05	1.27022	0.0220684	0.193325	3.42083	1.77434
3869			level4			1096.72	340.3	POS										5.44078e-09	5.69788e-09	6.14832e-09	5.76233e-09	6.85906e-09	6.19632e-09	6.61583e-09	6.55707e-09	1.27832	0.048516	0.237455	1.13792	0.1864
3896			level4	Metaflumizone	-9.23499392483863	507.402	340	POS										4.27843e-06	5.60663e-06	5.22812e-06	5.03773e-06	2.76494e-06	1.66318e-06	1.84855e-06	2.09222e-06	1.44867	0.0048432	0.119665	0.415311	-1.26774
3897			level4			598.465	340	POS										2.14152e-06	2.23284e-06	1.53755e-06	1.97064e-06	2.86845e-07	1.16034e-06	7.56476e-07	7.34554e-07	1.24669	0.0207396	0.189237	0.372749	-1.42372
3913			level4			754.504	339.8	POS										5.1462e-06	4.33845e-06	4.83725e-06	4.77397e-06	8.00801e-07	1.09449e-06	3.36962e-06	1.75497e-06	1.25069	0.023334	0.196568	0.367613	-1.44374
3924			level4			568.491	339.7	POS										8.08155e-07	1.46498e-06	1.27826e-06	1.1838e-06	2.0978e-06	4.09906e-06	5.13029e-06	3.77572e-06	1.34745	0.0466841	0.237455	3.18949	1.67333
3928			level4			654.528	339.7	POS										4.29302e-07	8.56018e-07	6.14832e-09	4.30489e-07	3.55351e-06	1.67611e-06	3.18812e-06	2.80591e-06	1.06574	0.0190771	0.183484	6.51796	2.70442
3945			level4			943.629	339.5	POS										5.44078e-09	5.69788e-09	6.14832e-09	5.76233e-09	6.85906e-09	6.19632e-09	6.61583e-09	6.55707e-09	1.27832	0.048516	0.237455	1.13792	0.1864
3960			level4			560.444	339.3	POS										8.39738e-06	1.92561e-05	1.98026e-05	1.58187e-05	3.06642e-05	3.96552e-05	2.48885e-05	3.1736e-05	1.19263	0.0486737	0.237668	2.00623	1.00449
3962			level4	Relcovaptan (SR-49059)	-22.5247381143886	621.493	339.3	POS										1.54642e-06	1.99387e-06	9.47804e-07	1.49603e-06	5.39294e-06	3.07807e-06	4.84919e-06	4.44007e-06	1.3864	0.0180704	0.179776	2.9679	1.56944
3981			level4	Pentetic acid	-9.09268868097784	394.353	339.1	POS										3.93064e-07	8.68073e-07	9.0778e-07	7.22972e-07	4.48127e-06	1.8062e-06	3.68679e-06	3.32475e-06	1.39315	0.0325507	0.221132	4.59873	2.20124
3982			level4			421.293	339.1	POS										3.74908e-07	5.69788e-09	6.14832e-09	1.28918e-07	2.1995e-06	1.17385e-06	3.10607e-06	2.1598e-06	1.31507	0.0237255	0.197469	16.7533	4.06638
3991			level4			612.411	339	POS										5.44078e-09	5.69788e-09	6.14832e-09	5.76233e-09	6.85906e-09	6.19632e-09	6.61583e-09	6.55707e-09	1.27832	0.048516	0.237455	1.13792	0.1864
4009			level4			767.708	338.9	POS										4.96489e-07	3.31942e-06	1.0691e-06	1.62834e-06	9.18904e-06	7.7733e-06	6.16157e-06	7.70797e-06	1.31971	0.00774881	0.137461	4.73364	2.24295
4012			level4	N-(4-(7-Diethylamino 4-methylcoumarin-3-yl)phenyl)iodoacetamide	9.83682784014357	491.353	338.8	POS										2.51276e-07	2.78547e-07	2.47756e-07	2.59193e-07	4.19042e-07	3.21985e-07	3.97182e-07	3.79403e-07	1.41068	0.0178055	0.17869	1.46379	0.549704
4013			level4			766.704	338.8	POS										7.69129e-07	5.26477e-06	1.72042e-06	2.58478e-06	1.28989e-05	1.01435e-05	9.07362e-06	1.07054e-05	1.29048	0.0103275	0.150657	4.1417	2.05022
4019			level4			544.494	338.7	POS										3.68109e-07	1.86483e-06	2.00622e-06	1.41305e-06	6.61815e-06	3.08206e-06	5.82392e-06	5.17471e-06	1.2148	0.0343655	0.224742	3.66208	1.87266
4030			level4	Propenoyl-CoA	-3.86644538607633	822.586	338.5	POS										1.52844e-06	2.32466e-06	3.22504e-06	2.35938e-06	1.94554e-07	8.51966e-07	2.79849e-07	4.42123e-07	1.375	0.0226476	0.195013	0.187389	-2.41589
4039			level4			901.731	338.4	POS										1.13838e-07	5.69788e-09	4.77347e-07	1.98961e-07	1.74899e-06	9.21629e-07	9.25054e-07	1.19856e-06	1.15428	0.0321395	0.220108	6.02408	2.59074
4043			level4	TG(20:0/22:4(7Z,10Z,13Z,16Z)/20:0)	-15.9463044861257	996.62	338.4	POS										3.06317e-06	2.8421e-06	3.95515e-06	3.2868e-06	2.48669e-06	1.87262e-06	2.0397e-06	2.133e-06	1.31678	0.0405118	0.236908	0.64896	-0.623799
4047			level4	(1R,2R)-5,5-Dichloro-N-(1-cyanocyclopropyl)-2-(4-(4-(methylsulfonyl)phenyl)-1-(2,2,2-trifluoroethyl)-1H-pyrazol-3-yl)cyclohexanecarboxamide	-3.68570515760132	564.425	338.3	POS										1.61386e-06	9.88162e-07	1.41482e-06	1.33895e-06	2.33409e-06	2.64107e-06	1.93365e-06	2.30294e-06	1.32602	0.0249755	0.201179	1.71996	0.782373
4053			level4			554.361	338.2	POS										7.71656e-06	8.01041e-06	1.16041e-05	9.11035e-06	4.61998e-06	6.27161e-06	3.92319e-06	4.93826e-06	1.32353	0.043408	0.237455	0.542049	-0.883504
4058			level4			781.596	338.2	POS										5.44078e-09	4.38133e-07	4.01769e-07	2.81781e-07	3.99176e-06	1.83923e-06	2.91671e-06	2.9159e-06	1.17156	0.0144057	0.167694	10.3481	3.3713
4077			level4			850.517	338	POS										2.261e-06	2.8994e-06	4.42303e-06	3.19448e-06	6.41744e-07	6.19632e-09	5.72852e-07	4.0693e-07	1.10023	0.0142956	0.167283	0.127386	-2.97273
4101			level4	3-Oxohexanoyl-CoA	17.1923125805488	880.683	337.8	POS										2.11287e-06	1.32533e-06	1.62266e-06	1.68695e-06	6.87487e-07	8.46439e-07	6.8668e-07	7.40202e-07	1.4573	0.0159002	0.17346	0.438781	-1.18843
4126			level4			966.677	337.7	POS										5.44078e-09	5.69788e-09	6.14832e-09	5.76233e-09	6.85906e-09	6.19632e-09	6.61583e-09	6.55707e-09	1.27832	0.048516	0.237455	1.13792	0.1864
4143			level4			508.455	337.4	POS										1.05999e-05	7.21401e-06	5.60033e-06	7.80475e-06	1.81773e-05	1.1465e-05	1.5523e-05	1.50551e-05	1.28653	0.0413483	0.237455	1.92897	0.947827
4144			level4	2-(Diphenylmethyl)-N-((2-iodophenyl)methyl)-3-quinuclidinamine	8.10979315438782	509.458	337.4	POS										2.86101e-06	1.92706e-06	1.54908e-06	2.11238e-06	5.46877e-06	3.49767e-06	4.36853e-06	4.44499e-06	1.34545	0.0278748	0.209376	2.10425	1.07331
4148			level4	Amritoside	15.2015934266279	627.491	337.2	POS										1.43319e-06	1.38464e-06	2.06583e-06	1.62789e-06	4.35172e-06	2.51917e-06	3.09269e-06	3.32119e-06	1.35803	0.0441395	0.237455	2.04019	1.0287
4150			level4	3-Oxohexanoyl-CoA	22.876322981828	880.688	337.2	POS										2.41021e-06	2.067e-06	2.88316e-06	2.45346e-06	1.19471e-06	1.31142e-06	1.33737e-06	1.28117e-06	1.4764	0.00820884	0.140642	0.522189	-0.937357
4158			level4			674.534	337.1	POS										2.80022e-06	1.79491e-06	7.95892e-07	1.79701e-06	4.22698e-06	3.69679e-06	4.56682e-06	4.16353e-06	1.22033	0.0199968	0.186578	2.31693	1.21221
4164			level4			967.561	337.1	POS										3.31793e-06	5.71675e-06	5.20203e-06	4.74557e-06	1.89093e-06	1.82532e-06	8.18482e-07	1.51158e-06	1.37365	0.0160644	0.174035	0.318524	-1.65053
4168			level4			528.466	337	POS										1.1896e-06	1.28426e-06	2.54765e-06	1.67383e-06	3.01504e-06	3.88566e-06	2.89779e-06	3.26616e-06	1.2732	0.0414141	0.237455	1.9513	0.964439
4186			level4			803.54	336.8	POS										1.19974e-07	3.4877e-07	2.71316e-07	2.46687e-07	2.41516e-06	1.25837e-06	1.95548e-06	1.87634e-06	1.46626	0.0089558	0.143894	7.60616	2.92717
4204			level4	GDP-4-acetamido-4,6-dideoxy-alpha-D-mannose	-8.52895714673636	631.395	336.4	POS										4.23383e-06	5.42083e-06	4.64853e-06	4.76773e-06	2.82829e-06	1.24212e-06	7.47805e-07	1.60607e-06	1.31376	0.0116314	0.156894	0.336863	-1.56977
4211			level4	Fostemsavir	-5.95820379846898	584.502	336.3	POS										6.52451e-07	1.88741e-06	1.40667e-06	1.31551e-06	8.06573e-06	3.54348e-06	5.03218e-06	5.54713e-06	1.37218	0.0372863	0.231324	4.21671	2.07612
4220			level4			802.535	336.2	POS										5.69596e-07	1.08281e-06	1.37651e-07	5.96686e-07	4.53477e-06	2.04796e-06	4.57215e-06	3.71829e-06	1.30123	0.0237512	0.197606	6.23157	2.6396
4232			level4	GDP-alpha-D-glucose	-1.61868834190438	604.334	336	POS										5.44078e-09	5.69788e-09	6.14832e-09	5.76233e-09	6.85906e-09	6.19632e-09	6.61583e-09	6.55707e-09	1.27832	0.048516	0.237455	1.13792	0.1864
4243			level4			75.2633	335.8	POS										5.44078e-09	5.69788e-09	6.14832e-09	5.76233e-09	6.85906e-09	6.19632e-09	6.61583e-09	6.55707e-09	1.27832	0.048516	0.237455	1.13792	0.1864
4244			level4			106.069	335.8	POS										1.64076e-06	1.35839e-06	1.79866e-06	1.59927e-06	2.20268e-07	3.96832e-07	6.61583e-09	2.07905e-07	1.1821	0.00124691	0.0816975	0.13	-2.94342
4245			level4			106.18	335.8	POS										7.56805e-07	5.59372e-07	8.52715e-07	7.22964e-07	6.85906e-09	6.19632e-09	6.61583e-09	6.55707e-09	1.553	0.0142201	0.167055	0.00906971	-6.78473
4247			level4	Emricasan	-17.6934557776579	570.507	335.8	POS										8.27704e-05	7.4361e-05	6.75658e-05	7.48991e-05	0.000108675	0.000108248	0.000119347	0.00011209	1.47688	0.0028543	0.103946	1.49655	0.581639
4248			level4			571.511	335.8	POS										3.32785e-05	2.89552e-05	2.49567e-05	2.90635e-05	4.65399e-05	4.04004e-05	4.97596e-05	4.55666e-05	1.41568	0.0106302	0.152052	1.56783	0.648771
4249			level4	Cefepime hydrochloride	14.5641753552238	572.514	335.8	POS										5.26578e-06	4.62914e-06	4.60034e-06	4.83175e-06	8.32946e-06	6.61373e-06	7.6645e-06	7.5359e-06	1.46641	0.00767756	0.137308	1.55966	0.641233
4250			level4			678.37	335.8	POS										5.44078e-09	5.69788e-09	6.14832e-09	5.76233e-09	6.85906e-09	6.19632e-09	6.61583e-09	6.55707e-09	1.27832	0.048516	0.237455	1.13792	0.1864
4251			level4			876.56	335.8	POS										1.40539e-06	1.49973e-06	1.13586e-06	1.34699e-06	2.31338e-06	2.11615e-06	3.23798e-06	2.55583e-06	1.39695	0.0289953	0.211898	1.89743	0.924049
4252			level4	TG(20:0/22:4(7Z,10Z,13Z,16Z)/O-18:0)	-12.0348232411406	954.612	335.8	POS										5.36884e-05	4.41513e-05	5.50501e-05	5.09633e-05	1.45757e-05	1.2706e-05	7.67775e-06	1.16532e-05	1.50106	0.000600957	0.0667538	0.228658	-2.12874
4253			level4			955.615	335.8	POS										3.04454e-05	2.46482e-05	3.07217e-05	2.86051e-05	7.11749e-06	6.3302e-06	4.66992e-06	6.0392e-06	1.52994	0.000431009	0.06041	0.211123	-2.24384
4254			level4	TG(22:0/20:3(5Z,8Z,11Z)/O-18:0)	-21.0087146515864	956.619	335.8	POS										9.80228e-06	8.55537e-06	9.88064e-06	9.41277e-06	2.1931e-06	1.99988e-06	1.23573e-06	1.80957e-06	1.52122	0.000126656	0.0488946	0.192247	-2.37897
4255			level4			957.622	335.8	POS										2.00714e-06	3.06484e-06	3.63482e-06	2.90227e-06	1.16115e-06	1.07223e-07	4.0163e-07	5.56669e-07	1.26719	0.0147516	0.168824	0.191805	-2.38229
4259			level4			1092.73	335.8	POS										5.44078e-09	5.69788e-09	6.14832e-09	5.76233e-09	6.85906e-09	6.19632e-09	6.61583e-09	6.55707e-09	1.27832	0.048516	0.237455	1.13792	0.1864
4269			level4	Fructoselysine 6-phosphate	-0.712320963851524	389.315	335.5	POS										1.10674e-06	1.39317e-06	1.36843e-06	1.28944e-06	2.07661e-06	1.65774e-06	1.91038e-06	1.88158e-06	1.38417	0.0177589	0.178644	1.45921	0.545192
4270			level4	11-O-Demethylpradinone I	6.51064714983742	465.388	335.5	POS										1.66618e-06	1.31782e-06	1.6307e-06	1.53823e-06	4.49683e-06	2.72026e-06	4.61177e-06	3.94295e-06	1.45019	0.0180692	0.179776	2.5633	1.358
4271			level4	7-Hydroxy-3-methoxy-1-primeverosyloxyxanthone	-8.64572092384248	553.484	335.5	POS										5.89124e-06	3.56539e-06	3.3847e-06	4.28044e-06	9.465e-06	6.66769e-06	9.4315e-06	8.5214e-06	1.33986	0.0260396	0.204507	1.99077	0.99333
4272			level4			554.487	335.5	POS										1.01746e-06	9.33448e-07	1.07054e-06	1.00715e-06	1.12567e-06	1.21222e-06	1.33897e-06	1.22562e-06	1.31101	0.0413502	0.237455	1.21692	0.283232
4273			level4	5''-(4-Hydroxy-(E)-cinnamoyl) alpha-L-arabinofuranosyl-(1->3)-beta-D-xylopyranosyl-(1->4)-D-xylopyranoside	-11.9118240274973	561.503	335.5	POS										4.34878e-06	4.34408e-06	2.15545e-06	3.6161e-06	1.41161e-05	7.16872e-06	8.70031e-06	9.99505e-06	1.32808	0.045929	0.237455	2.76404	1.46678
4278			level4			1075.74	335.5	POS										5.44078e-09	5.69788e-09	6.14832e-09	5.76233e-09	6.85906e-09	6.19632e-09	6.61583e-09	6.55707e-09	1.27832	0.048516	0.237455	1.13792	0.1864
4283			level4			836.659	335.4	POS										5.44078e-09	5.69788e-09	6.14832e-09	5.76233e-09	6.85906e-09	6.19632e-09	6.61583e-09	6.55707e-09	1.27832	0.048516	0.237455	1.13792	0.1864
4287			level4			552.481	335.3	POS										1.79328e-05	1.31114e-05	1.08221e-05	1.39554e-05	2.81381e-05	2.06931e-05	2.68255e-05	2.52189e-05	1.34651	0.022264	0.194077	1.8071	0.853677
4288			level4			593.435	335.3	POS										9.20043e-07	2.36269e-07	4.60315e-07	5.38876e-07	2.95853e-06	1.45331e-06	4.02414e-06	2.81199e-06	1.35837	0.0422695	0.237455	5.21826	2.38357
4297			level4	Lorglumide	-9.09122570264189	460.413	335.2	POS										1.78059e-06	3.70899e-06	2.44747e-06	2.64568e-06	9.09886e-06	6.97988e-06	1.33505e-05	9.80975e-06	1.43007	0.0215508	0.191758	3.70783	1.89058
4298			level4			461.416	335.2	POS										5.02901e-07	1.26076e-06	5.95386e-07	7.8635e-07	2.27045e-06	1.77327e-06	3.23837e-06	2.42736e-06	1.35281	0.0289503	0.211771	3.08687	1.62615
4307			level4			1119.75	335.1	POS										5.44078e-09	5.69788e-09	6.14832e-09	5.76233e-09	6.85906e-09	6.19632e-09	6.61583e-09	6.55707e-09	1.27832	0.048516	0.237455	1.13792	0.1864
4316			level4	Guadecitabine	7.93553120924595	558.429	334.9	POS										1.05077e-06	1.83973e-06	2.13843e-06	1.67631e-06	3.47023e-06	2.445e-06	4.1059e-06	3.34038e-06	1.25708	0.0460895	0.237455	1.99269	0.994721
4321			level4	3-Methylglutaconyl-CoA	5.62125284329156	894.657	334.8	POS										6.59164e-07	7.58549e-08	1.44877e-06	7.2793e-07	2.27013e-06	1.76836e-06	1.93548e-06	1.99133e-06	1.04768	0.0408316	0.237455	2.7356	1.45186
4324			level4			1133.77	334.8	POS										5.44078e-09	5.69788e-09	6.14832e-09	5.76233e-09	6.85906e-09	6.19632e-09	6.61583e-09	6.55707e-09	1.27832	0.048516	0.237455	1.13792	0.1864
4328			level4			1104.73	334.7	POS										5.44078e-09	5.69788e-09	6.14832e-09	5.76233e-09	6.85906e-09	6.19632e-09	6.61583e-09	6.55707e-09	1.27832	0.048516	0.237455	1.13792	0.1864
4331			level4	TG(24:1(15Z)/20:5(5Z,8Z,11Z,14Z,17Z)/24:1(15Z))	-9.01204545953043	1074.74	334.6	POS										5.44078e-09	5.69788e-09	6.14832e-09	5.76233e-09	6.85906e-09	6.19632e-09	6.61583e-09	6.55707e-09	1.27832	0.048516	0.237455	1.13792	0.1864
4332			level4			1118.75	334.6	POS										5.44078e-09	5.69788e-09	6.14832e-09	5.76233e-09	6.85906e-09	6.19632e-09	6.61583e-09	6.55707e-09	1.27832	0.048516	0.237455	1.13792	0.1864
4334			level4			83.4991	334.5	POS										1.40134e-06	9.8401e-07	1.21984e-06	1.20173e-06	2.08192e-06	1.7111e-06	1.69545e-06	1.82949e-06	1.35648	0.0229243	0.196034	1.52238	0.606332
4341			level4			1079.72	334.5	POS										5.44078e-09	5.69788e-09	6.14832e-09	5.76233e-09	6.85906e-09	6.19632e-09	6.61583e-09	6.55707e-09	1.27832	0.048516	0.237455	1.13792	0.1864
4350			level4	TG(20:0/20:3(5Z,8Z,11Z)/O-18:0)	10.9137991631015	928.595	334.4	POS										8.91975e-07	5.66437e-07	1.54e-06	9.9947e-07	3.45572e-07	6.19632e-09	6.61583e-09	1.19461e-07	1.23982	0.0459148	0.237455	0.119525	-3.06462
4354			level4	Termilin	-17.3923177371679	603.366	334.3	POS										1.62678e-06	1.66803e-06	1.96355e-06	1.75279e-06	1.18736e-06	4.53191e-07	1.15369e-06	9.31413e-07	1.14496	0.0349172	0.225796	0.53139	-0.912157
4363			level4			586.454	334.1	POS										1.45407e-05	6.37478e-06	1.41767e-05	1.16974e-05	3.53858e-06	4.20644e-06	2.03179e-06	3.25894e-06	1.35763	0.0369387	0.230441	0.278603	-1.84372
4374			level4			804.56	334	POS										3.90885e-06	4.16084e-06	2.0439e-06	3.3712e-06	3.08992e-07	9.14217e-07	1.56999e-07	4.60069e-07	1.39859	0.0146099	0.168336	0.136471	-2.87334
4379			level4			596.507	333.9	POS										2.57586e-05	1.72004e-05	1.51458e-05	1.93683e-05	3.82591e-05	3.05311e-05	3.84751e-05	3.57551e-05	1.35914	0.0171045	0.176535	1.84607	0.884454
4380			level4	Quercetin 3-O-[beta-D-xylosyl-(1->2)-beta-D-glucoside]	22.1686533692556	597.511	333.9	POS										7.98493e-06	6.33017e-06	4.51055e-06	6.27522e-06	1.20676e-05	9.84381e-06	1.23318e-05	1.14144e-05	1.34105	0.0157818	0.173138	1.81896	0.863117
4384			level4			765.532	333.9	POS										0.000125823	5.89614e-05	0.000105877	9.68873e-05	2.84563e-05	2.67002e-05	1.67263e-05	2.39609e-05	1.43531	0.0223793	0.194519	0.247307	-2.01562
4387			level4			805.564	333.9	POS										1.80576e-06	2.00312e-06	9.20365e-07	1.57642e-06	1.76522e-07	3.59139e-07	6.61583e-09	1.80759e-07	1.20404	0.0160125	0.173855	0.114665	-3.12451
4389			level4			1089.72	333.9	POS										5.44078e-09	5.69788e-09	6.14832e-09	5.76233e-09	6.85906e-09	6.19632e-09	6.61583e-09	6.55707e-09	1.27832	0.048516	0.237455	1.13792	0.1864
4390			level4			1166.75	333.9	POS										5.44078e-09	5.69788e-09	6.14832e-09	5.76233e-09	6.85906e-09	6.19632e-09	6.61583e-09	6.55707e-09	1.27832	0.048516	0.237455	1.13792	0.1864
4403			level4			806.647	333.8	POS										1.42829e-06	6.75377e-07	8.3036e-07	9.78009e-07	1.67081e-07	1.59189e-07	6.61583e-09	1.10962e-07	1.23454	0.0211452	0.190424	0.113457	-3.13978
4408			level4	3,5-Di-O-galloyl-4-O-digalloylquinic acid	20.264467071202	801.607	333.7	POS										6.00254e-06	3.75911e-06	3.50651e-06	4.42272e-06	7.62868e-06	7.26491e-06	7.72582e-06	7.53981e-06	1.33176	0.0180029	0.179548	1.70479	0.769593
4416			level4			546.429	333.4	POS										2.72415e-06	1.83139e-06	3.37545e-06	2.64366e-06	9.17237e-06	5.92106e-06	6.76825e-06	7.28723e-06	1.44044	0.0123218	0.159681	2.75649	1.46283
4418			level4	Trovafloxacin	2.21782798401377	417.361	333.2	POS										1.64285e-07	7.49317e-07	4.91016e-07	4.68206e-07	4.48285e-06	2.14665e-06	5.67026e-06	4.09992e-06	1.4081	0.0257529	0.203678	8.75665	3.13038
4425			level4			1063.8	333.1	POS										1.43773e-06	2.45778e-06	1.087e-06	1.66084e-06	7.0295e-07	3.51265e-07	6.61583e-09	3.5361e-07	1.03674	0.0460955	0.237455	0.212911	-2.23168
4426			level4			1120.71	333.1	POS										5.44078e-09	5.69788e-09	6.14832e-09	5.76233e-09	6.85906e-09	6.19632e-09	6.61583e-09	6.55707e-09	1.27832	0.048516	0.237455	1.13792	0.1864
4427			level4			1121.71	333.1	POS										5.44078e-09	5.69788e-09	6.14832e-09	5.76233e-09	6.85906e-09	6.19632e-09	6.61583e-09	6.55707e-09	1.27832	0.048516	0.237455	1.13792	0.1864
4428			level4	Lactitol dihydrate	-0.201397212883088	381.35	333	POS										9.50298e-07	1.8718e-06	1.63969e-06	1.48726e-06	8.57775e-06	4.7926e-06	1.01442e-05	7.83819e-06	1.46256	0.0169783	0.176219	5.27021	2.39786
4432			level4			686.605	333	POS										7.50794e-07	1.35951e-06	1.28288e-06	1.13106e-06	4.4486e-06	2.04586e-06	4.98811e-06	3.82752e-06	1.35811	0.0433709	0.237455	3.38402	1.75874
4434			level4			805.574	333	POS										3.09268e-06	5.12054e-06	1.70456e-06	3.30593e-06	4.17575e-07	6.02101e-07	6.61583e-09	3.42097e-07	1.15882	0.0422962	0.237455	0.10348	-3.27258
4436			level4	N6-(delta2-isopentenyl)-adenosine 5'-monophosphate	21.0028819552784	416.359	332.9	POS										3.68991e-06	8.05437e-06	5.31246e-06	5.68558e-06	4.08857e-05	1.97429e-05	4.11219e-05	3.39168e-05	1.46014	0.0172395	0.176812	5.96541	2.57662
4445			level4			1122.72	332.8	POS										5.44078e-09	5.69788e-09	6.14832e-09	5.76233e-09	6.85906e-09	6.19632e-09	6.61583e-09	6.55707e-09	1.27832	0.048516	0.237455	1.13792	0.1864
4447			level4	Inhibitor 60	11.490715060809	664.455	332.7	POS										0.00026806	0.000206249	0.000251506	0.000241938	0.000327639	0.000357628	0.000307109	0.000330792	1.35596	0.019659	0.185335	1.36726	0.451287
4450			level4			73.7171	332.6	POS										2.93285e-05	2.29062e-05	2.8832e-05	2.70222e-05	3.48841e-05	4.01337e-05	3.41842e-05	3.64007e-05	1.32432	0.0282477	0.21018	1.34706	0.429819
4454			level4			665.458	332.6	POS										6.45388e-05	5.02264e-05	5.98658e-05	5.82103e-05	7.74777e-05	8.51629e-05	7.4505e-05	7.90486e-05	1.37101	0.0168254	0.175877	1.35798	0.441464
4455			level4			680.478	332.6	POS										0.000116961	0.000116564	0.000120377	0.000117967	0.000157282	0.000165129	0.000141356	0.000154589	1.46643	0.0066984	0.132565	1.31044	0.390052
4456			level4			681.481	332.6	POS										5.93089e-05	4.63275e-05	5.19677e-05	5.25347e-05	6.78039e-05	7.13987e-05	6.46112e-05	6.79379e-05	1.34357	0.0220835	0.193336	1.2932	0.370947
4464			level4			73.8286	332.5	POS										1.25903e-05	9.27519e-06	1.21856e-05	1.13503e-05	1.49186e-05	1.73267e-05	1.43471e-05	1.55308e-05	1.27704	0.0393928	0.235053	1.36831	0.452396
4481			level4	Helenien	11.8805878227287	1046.71	332.5	POS										5.44078e-09	5.69788e-09	6.14832e-09	5.76233e-09	6.85906e-09	6.19632e-09	6.61583e-09	6.55707e-09	1.27832	0.048516	0.237455	1.13792	0.1864
4487			level4			735.529	332.4	POS										1.77776e-06	1.83562e-06	1.96396e-06	1.85911e-06	1.2632e-06	1.38765e-06	8.58278e-07	1.16971e-06	1.32749	0.0151109	0.170113	0.629176	-0.668464
4496			level4			73.94	332.3	POS										2.16203e-06	1.46733e-06	1.83437e-06	1.82124e-06	2.65002e-06	2.74929e-06	2.33072e-06	2.57668e-06	1.28607	0.0333282	0.222799	1.41479	0.500589
4498			level4			476.372	332.3	POS										2.53542e-07	5.50775e-07	1.45539e-07	3.16619e-07	2.15726e-06	1.09814e-06	2.65293e-06	1.96944e-06	1.39268	0.0252401	0.202175	6.22022	2.63697
4499			level4	Rhamnetin 3-laminaribioside	-16.824150116246	641.54	332.3	POS										7.59134e-06	3.50484e-06	4.43637e-06	5.17752e-06	9.82024e-06	8.57093e-06	1.27503e-05	1.03805e-05	1.28378	0.0410272	0.237455	2.00492	1.00354
4502			level4			682.485	332.3	POS										1.4511e-05	1.04871e-05	1.2252e-05	1.24167e-05	1.65449e-05	1.86519e-05	1.58843e-05	1.7027e-05	1.30393	0.032342	0.220668	1.3713	0.455542
4511			level4	2-Sulfamoyl-5-(5-(p-tolyl)-3-(trifluoromethyl)-1H-pyrazol-1-yl)benzoic acid	-18.7517043584708	426.379	332.1	POS										1.74768e-06	3.56828e-06	9.4158e-07	2.08585e-06	9.09028e-06	6.86337e-06	8.49864e-06	8.15076e-06	1.36839	0.00406042	0.113489	3.90765	1.9663
4525			level4			1094.69	331.9	POS										5.44078e-09	5.69788e-09	6.14832e-09	5.76233e-09	6.85906e-09	6.19632e-09	6.61583e-09	6.55707e-09	1.27832	0.048516	0.237455	1.13792	0.1864
4538			level4			1096.7	331.7	POS										5.44078e-09	5.69788e-09	6.14832e-09	5.76233e-09	6.85906e-09	6.19632e-09	6.61583e-09	6.55707e-09	1.27832	0.048516	0.237455	1.13792	0.1864
4544			level4			676.355	331.6	POS										5.44078e-09	5.69788e-09	6.14832e-09	5.76233e-09	6.85906e-09	6.19632e-09	6.61583e-09	6.55707e-09	1.27832	0.048516	0.237455	1.13792	0.1864
4548			level4			1095.7	331.6	POS										5.44078e-09	5.69788e-09	6.14832e-09	5.76233e-09	6.85906e-09	6.19632e-09	6.61583e-09	6.55707e-09	1.27832	0.048516	0.237455	1.13792	0.1864
4567			level4			684.56	331.2	POS										3.40278e-05	2.29353e-05	2.14732e-05	2.61455e-05	4.35618e-05	3.96567e-05	5.55227e-05	4.62471e-05	1.33548	0.0316727	0.219133	1.76884	0.822802
4568			level4			685.563	331.2	POS										1.36335e-05	8.38367e-06	8.34943e-06	1.01222e-05	1.71962e-05	1.49877e-05	2.11846e-05	1.77895e-05	1.30404	0.0384868	0.233731	1.75747	0.813502
4576			level4	2-Methyl-1-hydroxypropyl-ThPP	3.26363972821223	498.429	330.9	POS										0.000166396	0.000111958	9.64222e-05	0.000124925	5.18691e-05	5.69815e-05	2.57073e-05	4.48526e-05	1.36084	0.0264513	0.205525	0.359036	-1.4778
4582			level4			676.556	330.8	POS										4.73592e-06	3.12002e-06	3.06041e-06	3.63878e-06	5.4172e-06	6.5706e-06	5.23509e-06	5.74097e-06	1.2859	0.0381487	0.233101	1.57772	0.657838
4595			level4	Fenticonazole	24.6451471234207	456.418	330.5	POS										1.64519e-05	2.22946e-05	1.5872e-05	1.82061e-05	9.99367e-06	5.39562e-06	2.56272e-06	5.984e-06	1.30788	0.0148769	0.169426	0.32868	-1.60524
4602			level4			794.683	330.5	POS										1.1493e-05	5.36518e-06	8.44118e-06	8.43311e-06	1.47321e-05	1.96717e-05	1.48274e-05	1.64104e-05	1.28823	0.029501	0.212936	1.94595	0.960474
4611			level4	2,2'-(4,4'-(4,4'-Methylenebis(2-chloro-4,1-phenylene))bis(azanediyl)bis(oxomethylene)bis(azanediyl)bis(4,1-phenylene))bis(oxy)bis(2-Methylpropanoic acid)	3.69711660411462	710.59	330.3	POS										5.73908e-06	3.26499e-06	3.52829e-06	4.17746e-06	7.68111e-06	1.20528e-05	7.89093e-06	9.20829e-06	1.34711	0.0363935	0.229458	2.20428	1.14031
4612			level4			876.589	330.3	POS										5.23019e-06	3.86383e-06	4.70899e-06	4.601e-06	7.25176e-06	8.95911e-06	5.99541e-06	7.40209e-06	1.32044	0.0415949	0.237455	1.6088	0.685985
4621			level4			1003.66	330.2	POS										5.44078e-09	5.69788e-09	6.14832e-09	5.76233e-09	6.85906e-09	6.19632e-09	6.61583e-09	6.55707e-09	1.27832	0.048516	0.237455	1.13792	0.1864
4654			level4			775.627	329.9	POS										9.86739e-07	7.53511e-07	2.727e-07	6.70983e-07	3.539e-06	2.46574e-06	2.36318e-06	2.78931e-06	1.36465	0.00794451	0.138947	4.15704	2.05556
4663			level4			80.9543	329.7	POS										1.01477e-06	6.24502e-07	6.2167e-07	7.53649e-07	1.28126e-06	1.21236e-06	1.81619e-06	1.4366e-06	1.32185	0.0418167	0.237455	1.9062	0.930698
4667			level4			729.588	329.7	POS										1.46113e-05	1.16157e-05	9.46627e-06	1.18977e-05	2.16284e-05	1.66562e-05	2.52477e-05	2.11775e-05	1.33367	0.0330097	0.221981	1.77996	0.831842
4690			level4	TG(24:0/22:4(7Z,10Z,13Z,16Z)/O-18:0)	-6.31519108187308	1010.72	329.5	POS										8.67309e-07	2.36624e-06	1.5963e-06	1.60995e-06	6.85906e-09	6.19632e-09	5.53029e-07	1.88695e-07	1.23153	0.0388976	0.234216	0.117205	-3.09289
4707			level4	5'-Phosphoguanylyl(3'->5')guanosine	11.6079872845151	709.442	329.1	POS										4.49985e-05	2.43985e-05	2.9154e-05	3.28504e-05	1.96737e-05	1.03383e-05	8.86118e-06	1.29577e-05	1.31102	0.0484843	0.237455	0.394447	-1.3421
4710			level4			1091.72	329.1	POS										5.44078e-09	5.69788e-09	6.14832e-09	5.76233e-09	6.85906e-09	6.19632e-09	6.61583e-09	6.55707e-09	1.27832	0.048516	0.237455	1.13792	0.1864
4730			level4			663.352	328.7	POS										1.14787e-06	6.05427e-07	8.12305e-07	8.55201e-07	6.85906e-09	5.13005e-07	6.61583e-09	1.75493e-07	1.18699	0.0423993	0.237455	0.205207	-2.28485
4740			level4			660.519	328.6	POS										8.85697e-07	8.71851e-07	7.75069e-07	8.44206e-07	4.71833e-06	4.74027e-06	8.02078e-06	5.82646e-06	1.5303	0.0451037	0.237455	6.90171	2.78695
4744			level4			807.533	328.6	POS										5.12783e-06	2.11102e-06	4.292e-06	3.84362e-06	1.10659e-06	3.34203e-07	6.58825e-07	6.99871e-07	1.38096	0.0274714	0.208187	0.182087	-2.4573
4774			level4			456.346	328.1	POS										2.08971e-07	1.10183e-06	4.83214e-07	5.98004e-07	4.40168e-06	2.0658e-06	4.37893e-06	3.61547e-06	1.3612	0.0210919	0.190226	6.0459	2.59596
4795			level4	Oligoadenylate	-5.74419698468584	1006.64	328	POS										5.44078e-09	5.69788e-09	6.14832e-09	5.76233e-09	6.85906e-09	6.19632e-09	6.61583e-09	6.55707e-09	1.27832	0.048516	0.237455	1.13792	0.1864
4801			level4			873.688	327.9	POS										4.86333e-07	3.65975e-06	5.08627e-06	3.07745e-06	1.1808e-05	1.20838e-05	9.92681e-06	1.12729e-05	1.17416	0.00571019	0.125597	3.66306	1.87305
4830			level4			817.643	327.5	POS										1.0485e-05	6.40898e-06	7.66874e-06	8.18756e-06	1.32429e-05	1.22151e-05	1.70402e-05	1.41661e-05	1.32636	0.0345531	0.225225	1.7302	0.790936
4843			level4			102.954	327.3	POS										5.44078e-09	5.69788e-09	6.14832e-09	5.76233e-09	6.85906e-09	6.19632e-09	6.61583e-09	6.55707e-09	1.27832	0.048516	0.237455	1.13792	0.1864
4852			level4	DG(22:4(7Z,10Z,13Z,16Z)/24:0/0:0)	-11.062306859327	758.219	327.3	POS										4.97737e-05	5.11286e-05	4.7913e-05	4.96051e-05	6.10336e-05	5.57345e-05	5.8327e-05	5.83651e-05	1.44491	0.00810265	0.13998	1.17659	0.234616
4853			level4	DG(a-25:0/20:3(5Z,8Z,11Z)-O(14R,15S)/0:0)	0.952832549584229	760.218	327.3	POS										2.96397e-05	3.10672e-05	2.85331e-05	2.97467e-05	3.9637e-05	3.35439e-05	3.50627e-05	3.60812e-05	1.34407	0.0325512	0.221132	1.21295	0.278518
4871			level4			667.47	327.2	POS										1.32765e-06	1.91507e-06	9.26074e-07	1.3896e-06	2.69812e-06	3.29846e-06	2.14367e-06	2.71342e-06	1.25878	0.0396187	0.235198	1.95266	0.965444
4873			level4			759.22	327.2	POS										3.54641e-05	3.37274e-05	3.6586e-05	3.52592e-05	3.84035e-05	3.74448e-05	4.02317e-05	3.86934e-05	1.3027	0.0421735	0.237455	1.0974	0.134087
4880			level4	3',5'-Cyclic diGMP	18.1390583895605	691.431	327.1	POS										2.39175e-05	2.11038e-05	1.44781e-05	1.98331e-05	2.35658e-06	4.2019e-06	1.06604e-06	2.54151e-06	1.45788	0.00418833	0.114276	0.128145	-2.96416
4882			level4			761.217	327.1	POS										1.45325e-05	1.27083e-05	1.36048e-05	1.36152e-05	1.66132e-05	1.8578e-05	1.59551e-05	1.70487e-05	1.37167	0.0222955	0.194077	1.25218	0.324446
4885			level4	Fluridone	18.8976138855294	330.336	326.9	POS										3.83399e-05	2.65101e-05	2.5654e-05	3.0168e-05	8.22127e-06	7.00332e-06	1.12151e-05	8.81322e-06	1.48603	0.0075492	0.137109	0.292138	-1.77528
4892			level4			816.575	326.9	POS										8.71111e-06	8.7204e-06	5.56124e-06	7.66425e-06	1.05407e-05	1.35766e-05	1.30864e-05	1.24012e-05	1.27277	0.0283829	0.210499	1.61806	0.694266
4909			level4			988.631	326.7	POS										5.44078e-09	5.69788e-09	6.14832e-09	5.76233e-09	6.85906e-09	6.19632e-09	6.61583e-09	6.55707e-09	1.27832	0.048516	0.237455	1.13792	0.1864
4912			level4	Norsanguinarine	-9.69634242462067	318.299	326.6	POS										8.78881e-06	1.00098e-05	7.42483e-06	8.74115e-06	4.25947e-06	4.1081e-06	5.59113e-06	4.6529e-06	1.44285	0.00980109	0.147887	0.532299	-0.909692
4917			level4	Azidopine	9.36897444238119	558.534	326.6	POS										1.28011e-07	6.84401e-07	1.61667e-07	3.24693e-07	1.60635e-06	9.13596e-07	2.01598e-06	1.51197e-06	1.30205	0.0322746	0.220413	4.65663	2.21929
4921			level4			654.243	326.6	POS										6.54516e-06	5.02093e-06	4.13829e-06	5.23479e-06	1.94389e-06	1.95368e-06	8.21444e-07	1.57301e-06	1.39668	0.0100782	0.149247	0.300491	-1.73461
4922			level4	Acarbose 7IV-phosphate	-9.33950233510505	726.585	326.6	POS										1.02597e-06	1.24562e-06	2.61352e-07	8.44313e-07	2.97329e-06	2.55555e-06	1.70613e-06	2.41166e-06	1.17004	0.0304238	0.21586	2.85635	1.51417
4956			level4			670.522	326.2	POS										5.47625e-06	4.39923e-06	2.5767e-06	4.15073e-06	1.27369e-05	9.4725e-06	8.69869e-06	1.03027e-05	1.3658	0.0148071	0.169187	2.48214	1.31159
4957			level4			807.523	326.2	POS										4.03275e-06	1.93548e-06	2.38911e-06	2.78578e-06	7.99847e-07	3.11338e-07	3.32768e-07	4.81318e-07	1.43466	0.0246935	0.200423	0.172777	-2.53302
4966			level4			429.371	326	POS										0.000165839	0.000187225	0.000157497	0.000170187	0.000295569	0.000315733	0.000325996	0.000312433	1.52452	0.00034861	0.0568472	1.83582	0.876425
4975			level4			633.342	326	POS										5.44078e-09	5.69788e-09	6.14832e-09	5.76233e-09	6.85906e-09	6.19632e-09	6.61583e-09	6.55707e-09	1.27832	0.048516	0.237455	1.13792	0.1864
4976			level4			634.344	326	POS										5.44078e-09	5.69788e-09	6.14832e-09	5.76233e-09	6.85906e-09	6.19632e-09	6.61583e-09	6.55707e-09	1.27832	0.048516	0.237455	1.13792	0.1864
4981			level4			767.482	326	POS										2.83447e-06	1.14695e-06	3.23297e-06	2.40479e-06	1.50871e-07	4.99397e-07	2.55647e-07	3.01972e-07	1.41589	0.0314678	0.218526	0.125571	-2.99343
4990			level4			436.377	325.9	POS										1.73762e-06	1.47176e-06	1.07267e-06	1.42735e-06	3.40931e-06	2.84483e-06	4.01459e-06	3.42291e-06	1.44801	0.00684602	0.133683	2.39809	1.26188
4991			level4	Quinoline yellow WS	10.3134744032645	478.388	325.9	POS										1.30195e-06	2.14596e-06	9.13241e-07	1.45372e-06	9.47795e-06	4.35479e-06	9.36317e-06	7.73197e-06	1.4296	0.0220824	0.193336	5.31876	2.41109
4992			level4	N-[[3-(b-D-Glucopyranosyloxy)-2,3-dihydro-2-oxo-1H-indol-3-yl]acetyl]aspartic acid	-3.25467557705411	485.416	325.9	POS										1.52133e-05	1.33405e-05	1.46482e-05	1.44006e-05	4.54118e-06	1.18099e-05	6.32411e-06	7.55839e-06	1.2338	0.0386899	0.233839	0.524865	-0.929982
4997			level4			620.481	325.9	POS										3.62625e-06	4.65634e-06	3.40479e-06	3.8958e-06	7.02084e-06	7.45358e-06	9.34757e-06	7.94066e-06	1.45944	0.00758598	0.137109	2.03827	1.02734
5001			level4			321.241	325.8	POS										4.08885e-06	1.11716e-05	4.03441e-06	6.43161e-06	2.10169e-05	1.81946e-05	2.25566e-05	2.05894e-05	1.36394	0.0062602	0.129633	3.20128	1.67865
5004			level4			691.381	325.8	POS										1.43853e-05	1.29996e-05	1.0581e-05	1.26553e-05	6.85906e-09	3.86285e-06	6.61583e-09	1.29211e-06	1.23632	0.00260116	0.101428	0.1021	-3.29194
5022			level4	4',6-Dichloroflavan	-21.4092276832412	280.161	325.4	POS										1.80727e-06	1.5929e-06	1.06749e-06	1.48922e-06	4.01748e-06	2.63468e-06	5.11615e-06	3.92277e-06	1.37915	0.0316341	0.219005	2.6341	1.39731
5025			level4			436.398	325.4	POS										1.95156e-06	1.68928e-06	1.06041e-06	1.56708e-06	7.478e-06	3.47377e-06	6.77732e-06	5.90969e-06	1.41258	0.0263103	0.205056	3.77115	1.915
5026			level4	Tesevatinib	11.6473676713448	492.403	325.4	POS										3.69547e-06	4.60821e-06	3.31371e-06	3.87247e-06	2.38124e-05	1.36314e-05	2.48892e-05	2.07777e-05	1.50698	0.0408122	0.237455	5.36549	2.42371
5054			level4	5-[4-Phenyl-5-(trifluoromethyl)-2-thienyl]-3-[3-(trifluoromethyl)phenyl]-1,2,4-oxadiazole	17.5388318647807	441.375	325.3	POS										2.97735e-06	5.49014e-06	3.85689e-06	4.10813e-06	1.63222e-05	7.26471e-06	1.60739e-05	1.32203e-05	1.35862	0.0411523	0.237455	3.21807	1.6862
5065			level4			662.34	325.3	POS										5.44078e-09	5.69788e-09	6.14832e-09	5.76233e-09	6.85906e-09	6.19632e-09	6.61583e-09	6.55707e-09	1.27832	0.048516	0.237455	1.13792	0.1864
5076			level4	Maculosine	7.91802487022967	332.33	325.2	POS										5.44078e-09	4.81573e-07	8.39531e-07	4.42182e-07	3.50807e-05	4.02821e-05	3.95462e-05	3.8303e-05	1.35914	0.0015092	0.0865678	86.6228	6.43667
5084			level4			806.57	325.2	POS										6.19041e-07	9.71512e-07	9.82636e-07	8.57729e-07	7.86204e-08	7.26123e-08	3.05875e-07	1.52369e-07	1.38433	0.00765493	0.137229	0.177643	-2.49295
5085			level4			917.615	325.2	POS										3.82628e-06	3.50723e-06	3.94548e-06	3.75966e-06	1.07758e-05	6.84661e-06	1.01341e-05	9.25219e-06	1.48434	0.0443233	0.237455	2.46091	1.29919
5086			level4			1093.68	325.2	POS										5.44078e-09	5.69788e-09	6.14832e-09	5.76233e-09	6.85906e-09	6.19632e-09	6.61583e-09	6.55707e-09	1.27832	0.048516	0.237455	1.13792	0.1864
5091			level4			512.362	325.1	POS										8.96113e-06	1.85257e-05	1.92477e-05	1.55782e-05	4.2492e-06	1.88383e-06	1.71632e-06	2.61645e-06	1.43407	0.0191675	0.183843	0.167956	-2.57384
5093			level4			1092.68	325.1	POS										5.44078e-09	5.69788e-09	6.14832e-09	5.76233e-09	6.85906e-09	6.19632e-09	6.61583e-09	6.55707e-09	1.27832	0.048516	0.237455	1.13792	0.1864
5101			level4			637.279	325	POS										1.45786e-05	1.75168e-05	1.66414e-05	1.62456e-05	2.67427e-05	2.20491e-05	2.16179e-05	2.34699e-05	1.40561	0.0177154	0.178501	1.44469	0.530761
5109			level4	Sanguirine	-10.4613042176486	333.333	324.9	POS										1.38936e-07	8.99681e-08	5.9219e-07	2.73698e-07	1.06152e-05	1.00124e-05	8.81838e-06	9.81532e-06	1.501	6.55692e-05	0.0462829	35.8619	5.16438
5113			level4	6-(alpha-D-glucosaminyl)-1-phosphatidyl-1D-myo-inositol	3.85098777468831	552.4	324.9	POS										2.56298e-05	1.7517e-05	9.18277e-06	1.74432e-05	6.18812e-05	3.65529e-05	8.16842e-05	6.00394e-05	1.3325	0.0374702	0.23163	3.442	1.78325
5114			level4			553.404	324.9	POS										6.65813e-06	4.28049e-06	3.03081e-06	4.65648e-06	1.77204e-05	8.88764e-06	2.22214e-05	1.62765e-05	1.34951	0.0457741	0.237455	3.49545	1.80548
5121			level4			1095.69	324.9	POS										5.44078e-09	5.69788e-09	6.14832e-09	5.76233e-09	6.85906e-09	6.19632e-09	6.61583e-09	6.55707e-09	1.27832	0.048516	0.237455	1.13792	0.1864
5155			level4			663.344	324.7	POS										5.44078e-09	5.69788e-09	6.14832e-09	5.76233e-09	6.85906e-09	6.19632e-09	6.61583e-09	6.55707e-09	1.27832	0.048516	0.237455	1.13792	0.1864
5156			level4			695.34	324.7	POS										5.44078e-09	5.69788e-09	6.14832e-09	5.76233e-09	6.85906e-09	6.19632e-09	6.61583e-09	6.55707e-09	1.27832	0.048516	0.237455	1.13792	0.1864
5158			level4			707.427	324.7	POS										1.61743e-05	1.29865e-05	9.98694e-06	1.30493e-05	2.9214e-06	3.4853e-06	2.58255e-06	2.99642e-06	1.52342	0.0279751	0.209665	0.229624	-2.12266
5166			level4			1094.69	324.7	POS										5.44078e-09	5.69788e-09	6.14832e-09	5.76233e-09	6.85906e-09	6.19632e-09	6.61583e-09	6.55707e-09	1.27832	0.048516	0.237455	1.13792	0.1864
5177			level4	2,3-Bis(2-methoxy-4-nitro-5-sulfophenyl)-5-((phenylamino)carbonyl)-2H-tetrazolium hydroxide	16.9192516079272	652.548	324.6	POS										9.4482e-06	9.85067e-06	7.70903e-06	9.00263e-06	1.77826e-05	1.85081e-05	1.33047e-05	1.65318e-05	1.42258	0.0127391	0.161354	1.83633	0.876824
5183			level4			1061.69	324.6	POS										5.44078e-09	5.69788e-09	6.14832e-09	5.76233e-09	6.85906e-09	6.19632e-09	6.61583e-09	6.55707e-09	1.27832	0.048516	0.237455	1.13792	0.1864
5189			level4			520.398	324.5	POS										3.57439e-07	1.54528e-06	2.39411e-07	7.14042e-07	5.55951e-06	2.13164e-06	5.84222e-06	4.51113e-06	1.31212	0.039723	0.235474	6.31773	2.65941
5197			level4			155.081	324.4	POS										7.5167e-06	8.4052e-06	8.15486e-06	8.02559e-06	9.26473e-06	9.72974e-06	9.84567e-06	9.61338e-06	1.43215	0.0075733	0.137109	1.19784	0.260438
5207			level4			578.415	324.4	POS										1.33811e-06	8.39291e-07	1.18557e-07	7.6532e-07	3.46609e-06	1.70199e-06	4.07062e-06	3.07957e-06	1.14163	0.0434504	0.237455	4.02389	2.00859
5240			level4			1055.3	324.1	POS										1.06907e-05	9.80244e-06	8.29921e-06	9.59746e-06	1.39665e-05	1.59104e-05	2.03163e-05	1.67311e-05	1.39956	0.0235876	0.197135	1.74328	0.801806
5242			level4			171.112	324	POS										1.63205e-05	1.84068e-05	1.97547e-05	1.81607e-05	2.08236e-05	2.1288e-05	2.33119e-05	2.18079e-05	1.27725	0.0441094	0.237455	1.20083	0.26403
5250			level4	Petunidin 3-O-glucoside	11.7298150145771	480.424	324	POS										5.70972e-06	3.67601e-06	4.06173e-06	4.48248e-06	1.41702e-05	8.94222e-06	1.26529e-05	1.19218e-05	1.45406	0.0112844	0.155465	2.65964	1.41123
5251			level4	Ponceau MX	-7.02839687988001	481.426	324	POS										1.57333e-06	1.23674e-06	1.32397e-06	1.37801e-06	3.44633e-06	2.87208e-06	3.30019e-06	3.2062e-06	1.5255	0.000789543	0.0738442	2.32669	1.21828
5257			level4			619.326	324	POS										5.44078e-09	5.69788e-09	6.14832e-09	5.76233e-09	6.85906e-09	6.19632e-09	6.61583e-09	6.55707e-09	1.27832	0.048516	0.237455	1.13792	0.1864
5264			level4			776.452	324	POS										3.04511e-06	4.15131e-06	3.43743e-06	3.54461e-06	1.05735e-06	6.19632e-09	8.17754e-07	6.27099e-07	1.02737	0.00301201	0.105341	0.176916	-2.49886
5269			level4			422.361	323.9	POS										4.62214e-07	8.55454e-07	5.0453e-07	6.07399e-07	6.85906e-09	6.19632e-09	6.61583e-09	6.55707e-09	1.55248	0.0404319	0.236885	0.0107953	-6.53345
5271			level4			510.479	323.9	POS										1.46245e-06	2.59064e-06	2.79701e-06	2.28337e-06	6.85906e-09	7.28085e-07	4.69273e-07	4.01406e-07	1.06775	0.0155468	0.172042	0.175795	-2.50803
5282			level4	Diguanosine triphosphate	9.16203189251059	789.42	323.9	POS										5.44078e-09	5.69788e-09	6.14832e-09	5.76233e-09	6.85906e-09	6.19632e-09	6.61583e-09	6.55707e-09	1.27832	0.048516	0.237455	1.13792	0.1864
5287			level4			993.647	323.9	POS										5.33892e-06	5.18833e-06	5.15241e-06	5.22655e-06	6.13887e-06	7.21979e-06	6.74826e-06	6.70231e-06	1.44503	0.00973433	0.147618	1.28236	0.358798
5303			level4			736.472	323.7	POS										6.47307e-06	3.18787e-06	4.77006e-06	4.81033e-06	4.29436e-07	1.14896e-06	1.62116e-06	1.06652e-06	1.35714	0.0207041	0.1891	0.221714	-2.17323
5320			level4	CoA	13.3197990813519	768.552	323.5	POS										2.2562e-06	3.91998e-06	5.08465e-06	3.75361e-06	1.20254e-05	1.0993e-05	1.76636e-05	1.35607e-05	1.43798	0.0117038	0.157152	3.6127	1.85308
5321			level4			814.628	323.5	POS										1.65243e-05	5.51645e-06	2.35023e-05	1.5181e-05	2.86378e-05	3.37974e-05	4.72924e-05	3.65759e-05	1.17202	0.0487556	0.23788	2.40931	1.26862
5342			level4			697.335	323.4	POS										5.44078e-09	5.69788e-09	6.14832e-09	5.76233e-09	6.85906e-09	6.19632e-09	6.61583e-09	6.55707e-09	1.27832	0.048516	0.237455	1.13792	0.1864
5353			level4			917.644	323.4	POS										7.63787e-06	2.56453e-06	3.33395e-06	4.51212e-06	1.07258e-05	9.6088e-06	1.04446e-05	1.02597e-05	1.27439	0.0235545	0.197135	2.27382	1.18512
5392			level4			808.549	323	POS										1.4388e-05	1.35053e-05	2.03199e-05	1.60711e-05	3.92676e-06	3.7353e-06	1.67081e-06	3.11096e-06	1.46462	0.00456706	0.117288	0.193575	-2.36904
5398			level4			517.443	322.9	POS										4.62184e-07	5.86761e-07	2.41022e-07	4.29989e-07	2.74151e-06	1.5908e-06	2.75962e-06	2.36398e-06	1.45574	0.00840286	0.141211	5.49777	2.45885
5400			level4			563.3	322.9	POS										5.59609e-07	6.94664e-07	5.13074e-07	5.89116e-07	4.31416e-07	2.29353e-07	2.11768e-07	2.90846e-07	1.31071	0.0285908	0.210746	0.493699	-1.0183
5405			level4	3-[(2R)-2-Hydroxy-3-methyl-3-[(phosphonooxy)methyl]butanamido]propanoylcarnitine	-8.31054109159925	443.406	322.8	POS										8.44245e-07	1.12703e-06	1.79548e-06	1.25559e-06	6.48386e-06	3.79669e-06	7.25767e-06	5.84607e-06	1.462	0.0134032	0.163646	4.65605	2.21911
5406			level4			459.402	322.8	POS										9.5418e-07	1.08578e-06	1.31388e-06	1.11795e-06	1.95574e-06	1.7985e-06	2.07903e-06	1.94442e-06	1.47017	0.00339236	0.109296	1.73928	0.798489
5409			level4	UDP-L-Ara4FN	-11.1425310548449	564.302	322.8	POS										5.44078e-09	5.69788e-09	6.14832e-09	5.76233e-09	6.85906e-09	6.19632e-09	6.61583e-09	6.55707e-09	1.27832	0.048516	0.237455	1.13792	0.1864
5422			level4			524.45	322.7	POS										1.17076e-05	8.18061e-06	1.17422e-05	1.05435e-05	1.91679e-05	1.50744e-05	1.97486e-05	1.7997e-05	1.38036	0.0168078	0.175806	1.70693	0.771404
5423			level4			525.453	322.7	POS										1.93295e-06	1.64121e-06	1.43752e-06	1.67056e-06	4.3098e-06	2.79527e-06	3.95128e-06	3.68545e-06	1.44634	0.0136296	0.164629	2.20612	1.14151
5440			level4			520.409	322.6	POS										1.14771e-07	1.00987e-06	1.78273e-07	4.34304e-07	1.1276e-06	1.39671e-06	1.40977e-06	1.31136e-06	1.17006	0.044219	0.237455	3.01946	1.59429
5452			level4			476.362	322.4	POS										5.20023e-07	2.70447e-06	1.0109e-06	1.4118e-06	3.97534e-06	3.60618e-06	6.56291e-06	4.71481e-06	1.24922	0.044405	0.237455	3.33958	1.73967
5461			level4			737.573	322.3	POS										5.44078e-09	3.03701e-07	6.14832e-09	1.05097e-07	8.49794e-07	2.60252e-06	1.59394e-06	1.68208e-06	1.29895	0.0381282	0.233101	16.0051	4.00046
5464			level4			424.253	322.2	POS										5.65604e-06	5.61129e-06	5.13556e-06	5.46763e-06	4.79363e-06	4.96176e-06	4.94119e-06	4.89886e-06	1.34579	0.0312353	0.217989	0.895976	-0.158468
5476			level4	Tectorigenin 4'-sulfate	3.74257873499224	381.335	322.1	POS										3.4912e-06	7.73982e-06	3.3073e-06	4.84611e-06	1.54704e-05	1.233e-05	2.26146e-05	1.6805e-05	1.38432	0.0238245	0.197918	3.46774	1.79399
5478			level4	Diethylstilbestrol diphosphate	-8.58396955477503	429.314	322.1	POS										4.23833e-07	1.39732e-06	3.10049e-07	7.10402e-07	2.44191e-06	2.15682e-06	2.77247e-06	2.45706e-06	1.30195	0.010826	0.1529	3.4587	1.79023
5482			level4			510.451	322.1	POS										5.16603e-07	1.35783e-06	1.05192e-06	9.7545e-07	6.85906e-09	2.42384e-07	2.02909e-07	1.50717e-07	1.14379	0.0323828	0.220826	0.15451	-2.69422
5488			level4			568.5	322.1	POS										1.36312e-05	9.14375e-06	8.38301e-06	1.0386e-05	1.91287e-05	1.69022e-05	1.56704e-05	1.72338e-05	1.32626	0.0236385	0.197215	1.65933	0.730602
5508			level4	Sporamin	15.0402608668544	441.392	322	POS										2.23797e-06	4.32093e-06	4.8084e-06	3.7891e-06	9.7962e-06	6.86372e-06	8.67601e-06	8.44531e-06	1.32895	0.0160551	0.173997	2.22884	1.1563
5522			level4			1108.68	322	POS										5.44078e-09	5.69788e-09	6.14832e-09	5.76233e-09	6.85906e-09	6.19632e-09	6.61583e-09	6.55707e-09	1.27832	0.048516	0.237455	1.13792	0.1864
5523			level4			1109.68	322	POS										5.44078e-09	5.69788e-09	6.14832e-09	5.76233e-09	6.85906e-09	6.19632e-09	6.61583e-09	6.55707e-09	1.27832	0.048516	0.237455	1.13792	0.1864
5524			level4			137.857	321.9	POS										5.44078e-09	5.69788e-09	6.14832e-09	5.76233e-09	6.85906e-09	6.19632e-09	6.61583e-09	6.55707e-09	1.27832	0.048516	0.237455	1.13792	0.1864
5526			level4	3,3'-Biflaviolin	20.5304866782886	411.303	321.9	POS										1.53688e-06	1.50288e-06	2.12787e-06	1.72254e-06	4.92593e-06	3.39439e-06	5.31837e-06	4.54623e-06	1.46966	0.0104435	0.151062	2.63925	1.40013
5543			level4			489.372	321.6	POS										8.4223e-07	1.28152e-06	8.60784e-07	9.94845e-07	3.58257e-06	1.65129e-06	3.48356e-06	2.9058e-06	1.36194	0.0412692	0.237455	2.92086	1.54639
5544			level4	4'-Methyl-(-)-epigallocatechin 3'-glucuronide	-17.4784083258856	497.417	321.6	POS										2.41186e-05	2.86245e-05	3.56224e-05	2.94552e-05	1.31947e-05	5.11456e-06	1.7477e-05	1.19287e-05	1.2228	0.0237408	0.19757	0.40498	-1.30408
5552			level4			568.472	321.5	POS										1.14709e-05	7.2535e-06	7.08042e-06	8.60159e-06	1.87732e-05	1.45325e-05	1.8849e-05	1.73849e-05	1.39752	0.01225	0.159576	2.02113	1.01516
5562			level4			460.363	321.4	POS										1.27279e-06	1.45534e-06	2.72578e-07	1.00024e-06	3.0039e-06	4.10735e-06	2.20901e-06	3.10675e-06	1.16748	0.0334533	0.223081	3.10601	1.63506
5565			level4	L-Alanine, N-(2,6-dichloro-4-(((3-(2-furanyl)-1-oxo-2-propenyl)amino)methyl)benzoyl)-3-(((4R)-4-thiazolidinylcarbonyl)amino)-	20.3609161435405	542.418	321.4	POS										3.40845e-06	3.07532e-06	2.47314e-06	2.98564e-06	1.56961e-06	1.51342e-06	9.49811e-07	1.34428e-06	1.42136	0.00828141	0.140969	0.450249	-1.1512
5576			level4			613.447	321.4	POS										9.92611e-08	3.03526e-07	6.14832e-09	1.36312e-07	6.78233e-07	1.37047e-06	7.80175e-07	9.4296e-07	1.16547	0.0257566	0.203678	6.91766	2.79028
5585			level4	Propionyladenylate	23.6145946596871	404.301	321.3	POS										8.77906e-08	9.60955e-07	6.14832e-09	3.51631e-07	3.25819e-06	3.87982e-06	7.36487e-06	4.83429e-06	1.24103	0.0269894	0.206963	13.7482	3.78117
5587			level4	Neobignonoside	-21.4194845785467	569.477	321.3	POS										3.36351e-06	1.871e-06	2.17628e-06	2.47026e-06	6.08325e-06	4.03891e-06	6.07772e-06	5.39996e-06	1.36593	0.023204	0.196347	2.18599	1.12829
5600			level4	Alamifovir	20.7212123320605	576.439	320.9	POS										1.27082e-06	2.96424e-06	1.18946e-06	1.80817e-06	6.76162e-06	4.85751e-06	4.73406e-06	5.45106e-06	1.36446	0.0140983	0.166553	3.01468	1.592
5607			level4			546.396	320.8	POS										3.78087e-06	4.537e-06	4.85204e-06	4.38997e-06	1.98959e-06	1.91591e-06	3.52094e-06	2.47548e-06	1.27265	0.0352697	0.226652	0.563894	-0.826503
5621			level4	Quercetin 3,3',7-trissulfate	-17.6551499348311	543.423	320.7	POS										7.51975e-07	6.97601e-07	9.40619e-07	7.96731e-07	6.85906e-09	4.71627e-07	1.50567e-07	2.09684e-07	1.05399	0.0196696	0.185398	0.263181	-1.92587
5627			level4			667.336	320.7	POS										5.44078e-09	5.69788e-09	6.14832e-09	5.76233e-09	6.85906e-09	6.19632e-09	6.61583e-09	6.55707e-09	1.27832	0.048516	0.237455	1.13792	0.1864
5634			level4	3'-Azido-3'-deoxy-5'- O-beta-D-glucopyranuronosylthymidine	-12.3523396277847	444.367	320.6	POS										2.4965e-07	3.84259e-07	3.6045e-07	3.31453e-07	1.35234e-06	1.02537e-06	1.22594e-06	1.20121e-06	1.51452	0.00111118	0.0797182	3.62408	1.85762
5640			level4	dTDP-D-desosamine	13.6278496228929	560.413	320.5	POS										5.44078e-09	3.64897e-07	6.14832e-09	1.25495e-07	6.28405e-07	1.15533e-06	8.03462e-07	8.62398e-07	1.21616	0.0197111	0.185572	6.87196	2.78072
5641			level4			609.424	320.5	POS										9.83654e-07	1.53632e-06	1.19592e-06	1.23863e-06	4.17083e-06	2.99056e-06	4.29094e-06	3.81745e-06	1.48854	0.00440911	0.11535	3.08198	1.62386
5646			level4			607.418	320.3	POS										7.78414e-06	1.92194e-05	1.41006e-05	1.37014e-05	4.70059e-05	3.98007e-05	5.01462e-05	4.56509e-05	1.42732	0.00209121	0.0947714	3.33185	1.73632
5649			level4			608.422	320.2	POS										3.70035e-06	8.31844e-06	5.92283e-06	5.98054e-06	1.9302e-05	1.5881e-05	2.05805e-05	1.85878e-05	1.43441	0.0028673	0.103946	3.10805	1.63601
5656			level4	Zidovudine glucuronide	12.683340513057	444.382	320.1	POS										3.99245e-07	1.13121e-06	3.49558e-07	6.2667e-07	1.73798e-06	1.4503e-06	2.56372e-06	1.91733e-06	1.29187	0.0368044	0.230137	3.05956	1.61332
5657			level4	N-Pyridazin-3-yl-4-[[3-[5-(trifluoromethyl)pyridin-2-yl]oxyphenyl]methylidene]piperidine-1-carboxamide	5.10142916431098	456.451	320.1	POS										3.35836e-06	2.12435e-06	4.9125e-06	3.46507e-06	5.82243e-07	1.2597e-06	1.46274e-06	1.10156e-06	1.30124	0.0496914	0.240133	0.317904	-1.65334
5658			level4	O-(1->4)-alpha-L-Dihydrostreptosyl-streptidine 6-phosphate	0.0479127839396076	489.395	320.1	POS										9.09409e-07	2.98977e-06	7.87305e-07	1.56216e-06	5.11635e-06	3.66452e-06	6.5096e-06	5.09682e-06	1.28226	0.0314794	0.218544	3.26268	1.70606
5662			level4	5-Carboxypyranocyanidin 3-O-beta-glucopyranoside	-4.01340740145578	518.421	320.1	POS										2.26984e-06	7.55367e-06	2.87366e-06	4.23239e-06	1.62078e-05	7.91597e-06	1.70856e-05	1.37365e-05	1.27103	0.0476072	0.237455	3.24556	1.69847
5670			level4			626.461	320.1	POS										3.14503e-06	2.88195e-06	4.08673e-06	3.37123e-06	8.14103e-06	7.38792e-06	1.35723e-05	9.70043e-06	1.44475	0.0331184	0.222247	2.87741	1.52477
5674			level4			70.5914	320	POS										5.44078e-09	5.69788e-09	6.14832e-09	5.76233e-09	6.85906e-09	6.19632e-09	6.61583e-09	6.55707e-09	1.27832	0.048516	0.237455	1.13792	0.1864
5683			level4			612.502	320	POS										1.34099e-05	8.755e-06	7.82006e-06	9.99498e-06	2.07511e-05	1.65113e-05	2.34677e-05	2.02433e-05	1.37379	0.0183005	0.180427	2.02535	1.01817
5684			level4			613.506	320	POS										3.96422e-06	2.59908e-06	2.3888e-06	2.98403e-06	6.40577e-06	4.48394e-06	6.88e-06	5.92324e-06	1.34381	0.02919	0.212454	1.98498	0.989122
5690			level4			310.252	319.9	POS										3.09973e-06	2.48957e-06	2.02936e-06	2.53955e-06	5.84696e-07	1.30644e-06	5.92725e-07	8.27953e-07	1.40408	0.0119594	0.158583	0.326023	-1.61695
5694			level4			634.472	319.9	POS										1.79534e-06	2.02506e-06	1.40054e-06	1.74031e-06	3.50123e-06	2.38825e-06	2.95572e-06	2.9484e-06	1.33753	0.0307923	0.216858	1.69418	0.760584
5697			level4			404.315	319.8	POS										7.39488e-08	8.71496e-07	6.14832e-09	3.17198e-07	2.63482e-06	3.56614e-06	6.00828e-06	4.06975e-06	1.24122	0.0228391	0.195694	12.8303	3.68149
5706			level4			1087.71	319.7	POS										5.44078e-09	5.69788e-09	6.14832e-09	5.76233e-09	6.85906e-09	6.19632e-09	6.61583e-09	6.55707e-09	1.27832	0.048516	0.237455	1.13792	0.1864
5707			level4			445.347	319.6	POS										2.88877e-07	2.70706e-07	8.84881e-08	2.16024e-07	1.61297e-06	8.3695e-07	1.05851e-06	1.16947e-06	1.39536	0.0163853	0.174818	5.41364	2.4366
5714			level4			637.327	319.5	POS										6.41445e-06	8.06249e-06	7.49739e-06	7.32477e-06	1.29855e-05	1.01876e-05	1.30593e-05	1.20775e-05	1.43558	0.0110181	0.154046	1.64886	0.721466
5722			level4			445.366	319.4	POS										4.04411e-05	4.84279e-05	3.8349e-05	4.2406e-05	0.000163493	0.000132641	0.000132326	0.00014282	1.53425	0.00074011	0.0717184	3.36792	1.75186
5739			level4	6-Methylthioguanosine monophosphate	24.9760368968637	394.33	319.3	POS										2.7398e-06	4.51741e-06	7.96818e-07	2.68468e-06	1.39305e-05	2.40242e-05	3.56085e-05	2.4521e-05	1.38692	0.0263791	0.205183	9.1337	3.1912
5741			level4			1088.72	319.3	POS										5.44078e-09	5.69788e-09	6.14832e-09	5.76233e-09	6.85906e-09	6.19632e-09	6.61583e-09	6.55707e-09	1.27832	0.048516	0.237455	1.13792	0.1864
5748			level4			591.415	319.2	POS										3.57517e-06	4.92171e-06	5.93508e-06	4.81065e-06	1.26705e-05	9.50154e-06	1.2353e-05	1.15083e-05	1.45495	0.00532456	0.122945	2.39226	1.25837
5755			level4			590.411	319.1	POS										1.63297e-05	2.11417e-05	1.83662e-05	1.86126e-05	6.35302e-05	4.91749e-05	5.38052e-05	5.55034e-05	1.52814	0.00115992	0.080455	2.98204	1.5763
5757			level4			410.265	319	POS										1.50847e-06	1.37372e-06	1.47216e-06	1.45145e-06	2.93917e-06	2.66628e-06	3.44981e-06	3.01842e-06	1.52455	0.00255148	0.101083	2.07959	1.0563
5758			level4			589.408	319	POS										2.27092e-05	5.03148e-05	3.67288e-05	3.65843e-05	0.000145923	0.000117148	0.000131737	0.000131603	1.46243	0.00117522	0.080455	3.59725	1.8469
5759			level4			619.455	319	POS										9.95738e-07	5.09909e-06	7.90622e-07	2.29515e-06	8.71606e-06	7.04961e-06	1.07269e-05	8.83087e-06	1.26157	0.0206088	0.188737	3.84762	1.94397
5764			level4	O-Hexanoyl-adnosine monophosphate	-4.43816543848311	446.37	318.9	POS										1.11135e-05	1.26314e-05	8.47114e-06	1.07387e-05	4.08172e-05	3.23703e-05	3.08358e-05	3.46744e-05	1.50662	0.00199078	0.0936565	3.22893	1.69106
5794			level4			899.553	318.8	POS										5.44078e-09	5.69788e-09	6.14832e-09	5.76233e-09	6.85906e-09	6.19632e-09	6.61583e-09	6.55707e-09	1.27832	0.048516	0.237455	1.13792	0.1864
5796			level4			1089.72	318.8	POS										5.44078e-09	5.69788e-09	6.14832e-09	5.76233e-09	6.85906e-09	6.19632e-09	6.61583e-09	6.55707e-09	1.27832	0.048516	0.237455	1.13792	0.1864
5799			level4			496.414	318.7	POS										7.14855e-05	0.000139193	8.14793e-05	9.73859e-05	4.78163e-05	1.59679e-05	3.14176e-05	3.17339e-05	1.30669	0.0462929	0.237455	0.325857	-1.61769
5808			level4			806.538	318.7	POS										9.31992e-06	8.83668e-06	5.36693e-06	7.84118e-06	6.85906e-09	2.05283e-06	8.60126e-07	9.73272e-07	1.09826	0.0075978	0.137109	0.124123	-3.01016
5809			level4			807.541	318.7	POS										4.05394e-06	4.43798e-06	1.79367e-06	3.42853e-06	6.85906e-09	6.15367e-07	6.61583e-09	2.09614e-07	1.31146	0.019282	0.184112	0.0611381	-4.03178
5839			level4	ADP ribose 1'',2''-cyclic phosphate	-23.4151059668623	619.252	318.2	POS										5.44078e-09	5.69788e-09	6.14832e-09	5.76233e-09	6.85906e-09	6.19632e-09	6.61583e-09	6.55707e-09	1.27832	0.048516	0.237455	1.13792	0.1864
5842			level4			736.571	318.2	POS										1.57631e-06	1.54842e-06	1.09994e-06	1.40822e-06	3.28317e-06	2.49183e-06	3.35966e-06	3.04489e-06	1.44779	0.00671889	0.13261	2.16222	1.11251
5871			level4			773.517	318	POS										1.03463e-05	1.18738e-05	4.22528e-06	8.81513e-06	4.51103e-07	1.22437e-06	2.13099e-06	1.26882e-06	1.37091	0.0341285	0.224411	0.143937	-2.79649
5872			level4			774.528	318	POS										4.4934e-06	4.70878e-06	2.14991e-06	3.78403e-06	2.47853e-07	5.88872e-07	6.61583e-09	2.81114e-07	1.23799	0.0138418	0.165442	0.0742895	-3.7507
5889			level4			540.393	317.5	POS										1.18462e-06	1.05099e-06	7.81841e-07	1.00582e-06	2.17555e-06	1.8027e-06	1.50856e-06	1.82894e-06	1.36226	0.0220608	0.193285	1.81836	0.862638
5894			level4			632.45	317.5	POS										2.60123e-06	3.45907e-06	2.11796e-06	2.72609e-06	5.72906e-06	3.93123e-06	4.77815e-06	4.81281e-06	1.3165	0.0326877	0.221282	1.76546	0.820048
5913			level4	Estramustine phosphate	-12.4459049155004	521.381	317.4	POS										2.10449e-07	4.97916e-07	6.14832e-09	2.38171e-07	1.31885e-06	7.77388e-07	9.42857e-07	1.01303e-06	1.02497	0.0225069	0.194761	4.25338	2.08861
5915			level4			582.434	317.4	POS										1.83739e-06	1.66092e-06	2.50478e-06	2.00103e-06	3.45244e-06	3.38661e-06	3.78568e-06	3.54158e-06	1.43673	0.00568035	0.125503	1.76988	0.823651
5922			level4	17-Iodoheptadecanoic acid	13.6832570965371	397.366	317.2	POS										1.08279e-06	1.79361e-06	1.14919e-06	1.34186e-06	5.02123e-06	4.00055e-06	2.46746e-06	3.82975e-06	1.37974	0.0327106	0.221282	2.85405	1.51301
5931			level4			430.375	316.9	POS										5.24995e-05	6.78321e-05	2.71492e-05	4.91603e-05	0.000179622	0.000205635	0.00033973	0.000241663	1.43311	0.0195327	0.184863	4.91581	2.29743
5937			level4			81.3958	316.8	POS										1.66795e-05	1.52717e-05	1.63762e-05	1.61091e-05	2.36557e-05	2.22337e-05	2.40504e-05	2.33132e-05	1.5329	0.000497492	0.0633362	1.44721	0.533273
5938			level4			81.5073	316.8	POS										5.80085e-06	5.08645e-06	6.26419e-06	5.71716e-06	8.42341e-06	7.5683e-06	8.89309e-06	8.29494e-06	1.4504	0.00758668	0.137109	1.45088	0.536931
5957			level4	Pachyrrhizone	-24.7777222709439	367.319	316.8	POS										2.13622e-06	7.51914e-06	2.1474e-06	3.93425e-06	1.39281e-05	1.18021e-05	1.69811e-05	1.42371e-05	1.33255	0.0116514	0.156976	3.61876	1.85549
5962			level4			522.39	316.8	POS										2.00912e-06	1.09671e-06	9.60529e-07	1.35545e-06	3.86131e-06	3.65413e-06	5.43903e-06	4.31815e-06	1.42921	0.0105045	0.151271	3.18576	1.67164
5963			level4			571.51	316.8	POS										1.68655e-05	1.47159e-05	1.74812e-05	1.63542e-05	2.50329e-05	2.28156e-05	2.44235e-05	2.40906e-05	1.49733	0.00192545	0.0932974	1.47306	0.558813
5971			level4	TG(22:0/22:6(4Z,7Z,10Z,13Z,16Z,19Z)/22:0)	-2.65017752167367	1048.71	316.8	POS										1.9222e-06	4.11068e-07	6.2711e-06	2.86812e-06	8.05546e-06	1.12741e-05	7.20624e-06	8.84527e-06	1.12553	0.049781	0.240383	3.08399	1.6248
5976			level4			733.563	316.7	POS										0.00016387	0.000149971	0.000154795	0.000156212	0.000216807	0.000204598	0.000233013	0.00021814	1.50586	0.00252014	0.100643	1.39644	0.481749
5977			level4			734.565	316.7	POS										4.16026e-05	3.60215e-05	3.95997e-05	3.90746e-05	5.12177e-05	5.43882e-05	5.63359e-05	5.39806e-05	1.49001	0.0025236	0.100643	1.38147	0.466209
5978			level4			732.559	316.6	POS										0.00036369	0.000308561	0.000332811	0.000335021	0.00047252	0.00045272	0.000505924	0.000477055	1.48622	0.0030955	0.1064	1.42396	0.509905
5979			level4			81.6188	316.6	POS										2.77979e-07	3.38117e-07	2.99953e-07	3.0535e-07	7.39704e-07	8.53341e-07	1.08824e-06	8.93762e-07	1.51429	0.00482932	0.11952	2.92701	1.54943
5991			level4	Xanthurenate-8-O-beta-D-glucoside	23.4773316634599	368.323	316.3	POS										9.88226e-07	8.41313e-07	1.06537e-07	6.45358e-07	1.94086e-06	1.6791e-06	2.78948e-06	2.13648e-06	1.11631	0.0260298	0.204465	3.31053	1.72706
5995			level4	Emricasan	-17.8690453195007	570.507	316.2	POS										4.42082e-05	3.60018e-05	4.05852e-05	4.02651e-05	5.90544e-05	5.76025e-05	6.1137e-05	5.92647e-05	1.48882	0.00182879	0.091771	1.47186	0.557642
6004			level4	meta-O-Dealkylated flecainide lactam	14.7946140605207	347.314	316.1	POS										5.04811e-06	7.29826e-06	4.33688e-06	5.56108e-06	1.83022e-05	1.60548e-05	2.22866e-05	1.88812e-05	1.4902	0.00278524	0.103599	3.39524	1.76351
6007			level4	dTDP-3-amino-3,4,6-trideoxy-D-glucose	-5.79020727381055	532.35	316.1	POS										1.81666e-06	3.17178e-06	2.10187e-06	2.36344e-06	1.22558e-05	1.06595e-05	1.04173e-05	1.11109e-05	1.51661	0.000248049	0.0531838	4.70114	2.23301
6014			level4	Tris(2,3-dibromopropyl) phosphate	11.0712162140146	698.626	316.1	POS										1.62519e-06	2.20709e-06	1.31107e-06	1.71445e-06	3.72112e-07	2.35346e-07	1.0289e-06	5.45453e-07	1.27264	0.0311927	0.217913	0.31815	-1.65222
6023			level4			444.297	315.8	POS										4.95006e-07	2.07074e-06	4.65283e-07	1.01034e-06	6.51721e-06	7.20649e-06	6.82273e-06	6.84881e-06	1.41027	0.000500086	0.0633362	6.77869	2.76101
6024			level4			488.323	315.8	POS										2.59271e-06	4.66767e-06	3.60352e-06	3.6213e-06	2.14731e-05	2.08721e-05	2.06819e-05	2.1009e-05	1.52734	1.12413e-05	0.0234025	5.80151	2.53643
6032			level4			118.837	315.5	POS										5.44078e-09	5.69788e-09	6.14832e-09	5.76233e-09	6.85906e-09	6.19632e-09	6.61583e-09	6.55707e-09	1.27832	0.048516	0.237455	1.13792	0.1864
6033			level4			118.949	315.5	POS										5.44078e-09	5.69788e-09	6.14832e-09	5.76233e-09	6.85906e-09	6.19632e-09	6.61583e-09	6.55707e-09	1.27832	0.048516	0.237455	1.13792	0.1864
6038			level4	Halomon	-18.8757604452918	402.393	315.5	POS										1.93064e-05	1.53301e-05	1.86477e-05	1.77614e-05	1.06677e-05	6.83758e-06	1.07158e-05	9.40703e-06	1.37768	0.00933428	0.146073	0.529633	-0.916936
6049			level4			536.325	315.5	POS										4.98952e-06	2.93365e-06	3.0906e-06	3.67126e-06	0.000524359	0.000988298	0.00060778	0.000706812	1.54848	0.0388484	0.234099	192.526	7.58891
6056			level4			626.302	315.5	POS										7.37689e-07	7.46787e-07	3.78353e-07	6.20943e-07	1.45754e-06	1.40349e-06	1.51399e-06	1.45834e-06	1.38201	0.00261781	0.101774	2.34859	1.23179
6057			level4			627.315	315.5	POS										5.44078e-09	5.69788e-09	6.14832e-09	5.76233e-09	6.85906e-09	6.19632e-09	6.61583e-09	6.55707e-09	1.27832	0.048516	0.237455	1.13792	0.1864
6071			level4			1071.54	315.5	POS										5.44078e-09	5.69788e-09	6.14832e-09	5.76233e-09	6.85906e-09	6.19632e-09	6.61583e-09	6.55707e-09	1.27832	0.048516	0.237455	1.13792	0.1864
6080			level4	I-Abopx	9.07844265268555	576.375	315.1	POS										2.85323e-06	1.33186e-06	9.43841e-07	1.70964e-06	6.13465e-06	4.8048e-06	3.93803e-06	4.95916e-06	1.327	0.0198028	0.18588	2.9007	1.5364
6081			level4			616.428	315	POS										1.62606e-07	4.90606e-07	1.54562e-07	2.69258e-07	8.97546e-07	6.38238e-07	1.35372e-06	9.63168e-07	1.31097	0.0427046	0.237455	3.57712	1.8388
6083			level4			126.84	314.8	POS										5.44078e-09	5.69788e-09	6.14832e-09	5.76233e-09	6.85906e-09	6.19632e-09	6.61583e-09	6.55707e-09	1.27832	0.048516	0.237455	1.13792	0.1864
6089			level4			455.35	314.8	POS										2.72013e-06	4.32619e-06	2.75709e-06	3.2678e-06	8.79496e-06	4.77546e-06	8.08465e-06	7.21836e-06	1.32002	0.0426828	0.237455	2.20893	1.14335
6105			level4			1143.56	314.8	POS										5.44078e-09	5.69788e-09	6.14832e-09	5.76233e-09	6.85906e-09	6.19632e-09	6.61583e-09	6.55707e-09	1.27832	0.048516	0.237455	1.13792	0.1864
6106			level4			1144.56	314.8	POS										5.44078e-09	5.69788e-09	6.14832e-09	5.76233e-09	6.85906e-09	6.19632e-09	6.61583e-09	6.55707e-09	1.27832	0.048516	0.237455	1.13792	0.1864
6107			level4			1145.56	314.8	POS										5.44078e-09	5.69788e-09	6.14832e-09	5.76233e-09	6.85906e-09	6.19632e-09	6.61583e-09	6.55707e-09	1.27832	0.048516	0.237455	1.13792	0.1864
6116			level4			575.392	314.2	POS										2.65249e-06	4.63227e-06	2.44078e-06	3.24184e-06	1.16808e-05	7.72135e-06	1.06211e-05	1.00078e-05	1.43598	0.00790294	0.138551	3.08705	1.62623
6125			level4	NAD	-10.214566798824	664.426	314.1	POS										1.24144e-06	2.8264e-07	6.05161e-07	7.09747e-07	3.65679e-06	3.19959e-06	2.13239e-06	2.99626e-06	1.35384	0.0126892	0.160977	4.22159	2.07779
6127			level4	Attophos	15.7093843494144	365.343	314	POS										2.64188e-06	2.05933e-06	4.53936e-06	3.08019e-06	5.53458e-06	7.2069e-06	7.045e-06	6.59549e-06	1.33876	0.0186806	0.181623	2.14126	1.09846
6136			level4	Flufecet	8.59658079900441	364.341	313.8	POS										5.64738e-06	9.20445e-06	7.63552e-06	7.49578e-06	2.68604e-05	2.49895e-05	2.98447e-05	2.72315e-05	1.516	0.000351295	0.0568472	3.63291	1.86113
6139			level4			436.354	313.6	POS										4.19807e-06	1.09373e-05	4.08307e-06	6.40615e-06	1.45838e-05	1.74249e-05	2.51062e-05	1.90383e-05	1.31758	0.0310703	0.217624	2.97188	1.57138
6144			level4			742.543	313.5	POS										2.74187e-05	2.12288e-05	2.82277e-05	2.56251e-05	3.78128e-05	4.10043e-05	3.72793e-05	3.86988e-05	1.4241	0.00636535	0.13017	1.5102	0.594736
6145			level4			685.499	313.5	POS										5.44078e-09	5.69788e-09	6.14832e-09	5.76233e-09	2.54995e-06	2.44028e-06	2.77925e-06	2.58982e-06	1.55697	0.00149008	0.0861697	449.44	8.81199
6150			level4	Gonyautoxin 8	-23.298934419711	476.409	313.3	POS										9.37949e-07	8.98534e-06	4.66989e-06	4.86439e-06	1.49332e-05	1.30178e-05	1.98791e-05	1.59433e-05	1.15888	0.0231961	0.196347	3.27756	1.71262
6151			level4			493.291	313.3	POS										1.07548e-06	1.4228e-06	2.07794e-06	1.52541e-06	2.24457e-06	2.67487e-06	3.28571e-06	2.73505e-06	1.26968	0.0454567	0.237455	1.793	0.842376
6155			level4	L-Galacturonic acid calcium salt	16.7082257414472	427.355	313.1	POS										8.94104e-06	1.55539e-05	8.5613e-06	1.10187e-05	2.67124e-05	1.95746e-05	2.07585e-05	2.23485e-05	1.33715	0.0232273	0.196347	2.02823	1.02022
6178			level4			609.23	312.9	POS										5.44078e-09	5.69788e-09	6.14832e-09	5.76233e-09	6.85906e-09	6.19632e-09	6.61583e-09	6.55707e-09	1.27832	0.048516	0.237455	1.13792	0.1864
6196			level4			483.327	312.5	POS										7.72498e-06	1.16788e-05	8.50049e-06	9.30142e-06	2.74963e-05	2.31037e-05	3.14336e-05	2.73446e-05	1.49676	0.00258129	0.101428	2.93982	1.55573
6198			level4	Shoyuflavone B	14.4749613791333	403.322	312.4	POS										2.56136e-07	3.69578e-07	3.16569e-07	3.14094e-07	7.49666e-07	5.61874e-07	1.03861e-06	7.83383e-07	1.4162	0.0301043	0.214987	2.4941	1.31852
6201			level4			482.323	312.3	POS										2.70279e-05	4.2357e-05	3.06188e-05	3.33346e-05	9.6054e-05	8.18788e-05	0.00011292	9.69509e-05	1.4887	0.00324194	0.107792	2.90842	1.54024
6215			level4			428.315	312	POS										1.10335e-07	1.3543e-06	2.84731e-07	5.83122e-07	8.18879e-06	1.16838e-05	1.70046e-05	1.22924e-05	1.42354	0.0419886	0.237455	21.0803	4.39782
6226			level4	Monotropein	-16.336044051957	391.34	311.6	POS										3.30984e-06	7.28236e-06	5.52201e-06	5.3714e-06	1.89122e-05	1.45103e-05	2.18523e-05	1.84249e-05	1.44066	0.00574261	0.125894	3.43019	1.77829
6245			level4			408.367	311.3	POS										1.51729e-05	2.34485e-05	2.11139e-05	1.99118e-05	5.85332e-05	4.6765e-05	6.78596e-05	5.77193e-05	1.48557	0.00455121	0.117177	2.89875	1.53543
6246			level4	Tetracenomycin E	10.8321725860065	409.369	311.3	POS										7.78327e-06	7.13107e-06	8.35038e-06	7.75491e-06	1.37554e-05	1.2194e-05	1.61568e-05	1.40354e-05	1.49153	0.00646545	0.130885	1.80987	0.855888
6250			level4			708.428	311.3	POS										9.27204e-06	1.27353e-05	5.93454e-06	9.31396e-06	1.82135e-06	5.07542e-06	1.82457e-06	2.90711e-06	1.31736	0.0460841	0.237455	0.312124	-1.67981
6251			level4	Persicarin	-6.75354822424146	397.33	311.2	POS										3.23325e-06	7.71187e-06	4.61438e-06	5.1865e-06	1.73123e-05	1.02026e-05	1.80288e-05	1.51812e-05	1.35545	0.0241161	0.198708	2.92707	1.54946
6252			level4	Fucofuroeckol B	4.6479502735614	479.371	311.2	POS										5.68308e-07	1.60314e-06	1.25788e-06	1.14311e-06	2.87526e-06	1.91965e-06	3.07096e-06	2.62195e-06	1.23501	0.034189	0.224553	2.2937	1.19768
6266			level4	Nicousamide Pyrotinib Maleate	-0.191356960671576	401.306	310.9	POS										5.44078e-09	5.69788e-09	2.46717e-07	8.59519e-08	9.38265e-07	1.20697e-06	8.44525e-07	9.96586e-07	1.31766	0.00252649	0.100643	11.5947	3.53539
6287			level4	Amustaline	-3.62970807629902	435.366	310.6	POS										8.44899e-07	1.65882e-06	1.40746e-06	1.30373e-06	4.24175e-06	2.65499e-06	4.49377e-06	3.79684e-06	1.40327	0.0161762	0.174052	2.91229	1.54216
6292			level4	4-Deoxy-beta-D-gluc-4-enuronosyl-(1,3)-N-acetyl-D-galactosamine 4-sulfate	24.8670054713168	460.399	310.4	POS										1.078e-06	1.23299e-06	6.56864e-07	9.89287e-07	1.54789e-06	1.97529e-06	1.9243e-06	1.81583e-06	1.29186	0.0194222	0.184571	1.83549	0.876167
6295			level4			659.45	310.4	POS										2.73934e-06	4.09067e-06	2.87598e-06	3.23533e-06	7.0488e-06	1.11881e-05	9.9376e-06	9.39149e-06	1.46151	0.00903732	0.144388	2.90279	1.53744
6309			level4	Talc	-20.5043588175775	380.265	310.2	POS										1.05736e-06	1.27988e-06	1.05421e-06	1.13048e-06	6.03438e-06	5.46034e-06	4.73095e-06	5.40856e-06	1.54323	0.000371231	0.0575756	4.78429	2.2583
6310			level4	Methotrexate	19.6360658067157	455.455	310.2	POS										2.78959e-07	2.28742e-07	4.40887e-07	3.16196e-07	6.85906e-09	6.19632e-09	6.61583e-09	6.55707e-09	1.54599	0.0401748	0.23628	0.0207374	-5.59162
6313			level4			525.373	310.2	POS										2.82957e-05	3.04878e-05	2.58553e-05	2.82129e-05	0.00010253	8.35872e-05	0.000126524	0.000104214	1.52786	0.0245894	0.200092	3.69383	1.88512
6322			level4			580.391	310.2	POS										2.13862e-06	6.13866e-06	3.47511e-06	3.91747e-06	1.14537e-05	9.31448e-06	1.22032e-05	1.09905e-05	1.35164	0.00837064	0.141211	2.8055	1.48826
6332			level4	TG(18:0/22:2(13Z,16Z)/22:6(4Z,7Z,10Z,13Z,16Z,19Z))	23.9202745271763	988.62	310.2	POS										3.09212e-07	3.79319e-07	3.02285e-07	3.30272e-07	6.85906e-09	1.81728e-07	6.61583e-09	6.50677e-08	1.23299	0.013816	0.165419	0.197013	-2.34364
6337			level4	Bis(3-azidopyridinium)-1,10-decane perchlorate	-23.2093379669688	452.393	310	POS										2.32256e-05	3.59485e-05	3.61435e-05	3.17726e-05	8.96531e-05	6.87292e-05	9.4687e-05	8.43564e-05	1.46916	0.00432032	0.114884	2.65501	1.40872
6338			level4	Lirodenine	17.7359428162212	453.396	310	POS										5.78141e-06	7.80219e-06	9.76657e-06	7.78339e-06	2.23886e-05	1.75495e-05	2.37272e-05	2.12218e-05	1.47584	0.00364151	0.111562	2.72655	1.44708
6353			level4	U50488	-15.3700567381484	370.33	309.7	POS										1.19954e-05	2.28523e-05	1.74588e-05	1.74355e-05	8.09426e-05	5.8331e-05	7.1977e-05	7.04169e-05	1.49241	0.00189678	0.0929904	4.03871	2.01389
6368			level4			533.253	309.6	POS										1.23177e-05	3.73569e-06	5.05746e-06	7.03695e-06	1.60986e-05	1.82004e-05	1.38485e-05	1.60492e-05	1.2348	0.0378011	0.232291	2.2807	1.18948
6395			level4			822.534	309.6	POS										6.45806e-06	6.77297e-06	4.52478e-06	5.91861e-06	2.02025e-07	3.53101e-07	2.05884e-07	2.5367e-07	1.54538	0.0146856	0.168643	0.0428597	-4.54423
6400			level4			1104.71	309.6	POS										5.44078e-09	5.69788e-09	6.14832e-09	5.76233e-09	6.85906e-09	6.19632e-09	6.61583e-09	6.55707e-09	1.27832	0.048516	0.237455	1.13792	0.1864
6404			level4	Salicylamide glucuronide	22.4202105585102	314.276	309.5	POS										1.49793e-05	1.53051e-05	1.54032e-05	1.52292e-05	7.61142e-06	7.46301e-06	7.02591e-06	7.36678e-06	1.55332	3.49501e-06	0.0150954	0.483727	-1.04773
6405			level4	m-Carboxyphenyl phenylacetamidomethylphosphote	-18.5429765821892	350.276	309.5	POS										6.28094e-06	1.13482e-05	6.51035e-06	8.0465e-06	3.01978e-05	3.75596e-05	5.16858e-05	3.98144e-05	1.4847	0.0081948	0.140507	4.94804	2.30686
6406			level4	5-{2-Fluoro-5-[3-(3-hydroxy-2-methoxycarbonyl-phenoxy)-propenyl]-phenyl}-isoxazole-3-carboxylic acid	1.02429618946408	414.365	309.5	POS										2.10972e-06	7.79707e-06	5.96289e-06	5.2899e-06	1.50337e-05	8.7729e-06	1.30275e-05	1.2278e-05	1.15803	0.0486637	0.237637	2.32104	1.21477
6407			level4	Nicarbazin	-4.87027150253111	427.388	309.5	POS										2.35356e-06	2.76179e-06	2.81953e-06	2.64496e-06	1.37724e-05	1.11405e-05	8.62059e-06	1.11778e-05	1.52442	0.0280721	0.20996	4.22607	2.07932
6427			level4			663.317	309.5	POS										5.44078e-09	5.69788e-09	6.14832e-09	5.76233e-09	6.85906e-09	6.19632e-09	6.61583e-09	6.55707e-09	1.27832	0.048516	0.237455	1.13792	0.1864
6443			level4			713.402	309.3	POS										8.98317e-07	8.44381e-07	1.34774e-06	1.03015e-06	1.94917e-07	1.9711e-07	1.98465e-07	1.96831e-07	1.52808	0.0347572	0.225748	0.191071	-2.38782
6455			level4			577.328	309	POS										4.42829e-06	3.71204e-06	4.49318e-06	4.21117e-06	1.53442e-06	2.25027e-06	1.58674e-06	1.79047e-06	1.48584	0.00206085	0.0944685	0.425173	-1.23388
6458			level4			624.322	309	POS										1.79724e-06	1.13353e-06	2.10897e-06	1.67991e-06	3.97302e-06	2.88113e-06	3.28357e-06	3.37924e-06	1.36242	0.0167115	0.175653	2.01156	1.00831
6461			level4			639.28	309	POS										2.58079e-06	5.27328e-06	5.24561e-06	4.36656e-06	1.13172e-05	8.8638e-06	7.2411e-06	9.1407e-06	1.27617	0.0323426	0.220668	2.09334	1.06581
6482			level4	Sodium folite	-18.9265253338076	496.419	308.9	POS										2.79095e-05	4.04768e-05	4.3628e-05	3.73381e-05	9.85187e-05	7.64617e-05	0.000104486	9.31554e-05	1.46756	0.00466365	0.117874	2.49492	1.31899
6483			level4	4'-Methyl-(-)-epigallocatechin 3'-glucuronide	-7.00336933657761	497.422	308.9	POS										7.36862e-06	9.35225e-06	1.0793e-05	9.17128e-06	2.06256e-05	2.05934e-05	3.00723e-05	2.37638e-05	1.4722	0.0115747	0.156654	2.59111	1.37357
6484			level4	Drinabant	-21.8677872049888	498.376	308.9	POS										2.1319e-06	2.98347e-06	2.90983e-06	2.67507e-06	7.00039e-06	4.99048e-06	4.43872e-06	5.47653e-06	1.39757	0.0273533	0.207854	2.04725	1.03369
6485			level4	2-Methyl-1-hydroxypropyl-ThPP	-3.16955426614494	498.426	308.9	POS										7.60976e-07	1.67925e-06	1.38119e-06	1.27381e-06	2.98341e-06	2.85533e-06	4.15974e-06	3.33282e-06	1.37474	0.0141921	0.167055	2.61643	1.3876
6486			level4			508.375	308.9	POS										2.54286e-06	6.12041e-06	4.3086e-06	4.32396e-06	2.94152e-05	1.89488e-05	2.2521e-05	2.36283e-05	1.47862	0.0039865	0.112811	5.46451	2.45009
6487			level4			509.379	308.9	POS										7.65032e-07	1.14453e-06	2.37554e-06	1.42837e-06	7.30835e-06	4.96653e-06	6.37123e-06	6.21537e-06	1.43015	0.00461037	0.117465	4.35138	2.12147
6508			level4			691.348	308.9	POS										5.44078e-09	5.69788e-09	6.14832e-09	5.76233e-09	6.85906e-09	6.19632e-09	6.61583e-09	6.55707e-09	1.27832	0.048516	0.237455	1.13792	0.1864
6518			level4			727.481	308.9	POS										7.37971e-06	7.06923e-06	6.29019e-06	6.91304e-06	1.10706e-05	1.22489e-05	9.53697e-06	1.09521e-05	1.44708	0.00893461	0.143754	1.58427	0.663821
6519			level4			748.46	308.9	POS										1.93831e-06	7.25698e-07	1.70611e-06	1.45671e-06	6.85906e-09	6.19632e-09	3.32747e-07	1.15267e-07	1.28434	0.0257095	0.203584	0.0791287	-3.65965
6522			level4	3-[(2-oxoacetyl)oxy]-4-(trimethylazaniumyl)butanoate-CoA	-9.80705482346857	824.549	308.9	POS										3.37719e-05	3.24346e-05	2.11072e-05	2.91046e-05	3.83534e-06	5.21944e-06	2.2858e-06	3.78019e-06	1.50784	0.00350767	0.110372	0.129883	-2.94471
6523			level4			825.553	308.9	POS										1.68473e-05	1.5326e-05	1.04151e-05	1.41961e-05	1.12275e-06	8.87135e-07	9.85646e-07	9.9851e-07	1.54679	0.0208409	0.189509	0.0703368	-3.82958
6526			level4			563.384	308.8	POS										1.66734e-06	3.83382e-06	2.3102e-06	2.60379e-06	9.53756e-06	7.48008e-06	6.85689e-06	7.95818e-06	1.41537	0.00660844	0.13194	3.05639	1.61183
6542			level4			434.265	308.5	POS										2.74764e-06	2.2518e-06	2.18464e-06	2.39469e-06	4.78919e-06	5.56645e-06	6.91248e-06	5.75604e-06	1.4935	0.00647029	0.130909	2.40366	1.26524
6544			level4	Flutriafol	-10.5433058505208	302.295	308.4	POS										7.69681e-06	4.72952e-06	9.07459e-06	7.16697e-06	2.4888e-06	1.44948e-06	2.64135e-06	2.19321e-06	1.40094	0.0204012	0.187877	0.306016	-1.70832
6545			level4	Catechin 7-sulfate	-10.1979315744892	371.334	308.4	POS										3.00551e-06	5.0181e-06	3.84268e-06	3.95543e-06	1.81419e-05	1.47441e-05	1.57843e-05	1.62234e-05	1.51758	0.000455861	0.0615671	4.10156	2.03617
6546			level4	Triaminophenyl phosphate	-10.9782863360352	372.336	308.4	POS										9.89064e-07	8.31373e-07	1.19144e-06	1.00396e-06	2.09785e-06	1.63574e-06	1.88645e-06	1.87335e-06	1.45523	0.00682908	0.133521	1.86596	0.899916
6563			level4			675.315	308.3	POS										5.44078e-09	5.69788e-09	6.14832e-09	5.76233e-09	6.85906e-09	6.19632e-09	6.61583e-09	6.55707e-09	1.27832	0.048516	0.237455	1.13792	0.1864
6565			level4			677.33	308.3	POS										5.44078e-09	5.69788e-09	6.14832e-09	5.76233e-09	6.85906e-09	6.19632e-09	6.61583e-09	6.55707e-09	1.27832	0.048516	0.237455	1.13792	0.1864
6566			level4			681.512	308.3	POS										6.73777e-06	1.02537e-05	5.70556e-06	7.56566e-06	1.72518e-05	1.27626e-05	1.52428e-05	1.50858e-05	1.35861	0.0164822	0.174977	1.99398	0.995648
6583			level4			462.302	308.2	POS										2.25755e-06	2.17555e-06	6.14832e-09	1.47975e-06	1.39572e-05	9.05244e-06	1.8585e-05	1.38649e-05	1.05794	0.0121873	0.159236	9.36975	3.22801
6603			level4	Apigenin	-11.7548713740334	271.241	307.7	POS										8.64929e-07	1.84154e-06	2.65238e-07	9.9057e-07	2.72016e-06	2.95604e-06	2.30285e-06	2.65968e-06	1.13774	0.0284311	0.210569	2.685	1.42492
6607			level4			398.325	307.7	POS										9.70891e-07	1.5997e-06	7.36856e-07	1.10248e-06	5.51017e-06	3.62609e-06	2.82503e-06	3.9871e-06	1.40626	0.0260949	0.204603	3.61647	1.85458
6614			level4			541.449	307.7	POS										8.30681e-06	1.12898e-05	1.23749e-05	1.06572e-05	2.69325e-05	2.04976e-05	3.0197e-05	2.58757e-05	1.46338	0.00797376	0.139207	2.428	1.27977
6615			level4	Acrithrin	11.1247968608172	542.452	307.7	POS										1.43848e-06	1.97353e-06	1.36317e-06	1.59173e-06	5.45729e-06	5.93849e-06	5.04322e-06	5.47967e-06	1.5213	0.000270599	0.0535695	3.44259	1.78349
6620			level4	7-Hydroxy-6-methyl-8-ribityl lumazine	-6.93497584369364	329.283	307.6	POS										4.18059e-06	5.68344e-06	2.54625e-06	4.13676e-06	1.39191e-05	7.25217e-06	1.73198e-05	1.28303e-05	1.31731	0.0482574	0.237455	3.10154	1.63299
6627			level4	Cyfluthrin	-17.4460426684829	435.287	307.6	POS										2.17532e-06	1.48359e-06	2.12642e-06	1.92844e-06	4.56329e-06	6.0489e-06	3.11718e-06	4.57646e-06	1.36783	0.0389471	0.234337	2.37314	1.2468
6632			level4			540.444	307.6	POS										2.72909e-05	3.97418e-05	4.29415e-05	3.66581e-05	9.54406e-05	6.94001e-05	0.000100763	8.85345e-05	1.44589	0.00863215	0.142328	2.41514	1.27211
6641			level4			587.332	307.6	POS										7.00192e-06	8.29459e-06	8.87559e-06	8.05737e-06	2.10832e-06	4.08882e-06	2.93613e-06	3.04443e-06	1.44609	0.00327552	0.108273	0.377844	-1.40414
6650			level4			626.293	307.6	POS										1.5211e-06	1.16e-06	1.0343e-06	1.23847e-06	3.64936e-06	2.14674e-06	2.41182e-06	2.73597e-06	1.3897	0.0367722	0.230127	2.20916	1.1435
6653			level4			784.419	307.6	POS										1.50067e-05	2.20551e-05	1.1478e-05	1.61799e-05	1.56319e-07	9.69719e-07	6.61583e-09	3.77551e-07	1.35436	0.035548	0.227262	0.0233345	-5.42139
6658			level4			274.26	307.5	POS										5.91829e-06	4.75759e-06	5.19844e-06	5.29144e-06	4.08614e-06	3.71075e-06	3.07393e-06	3.62361e-06	1.36357	0.0205899	0.188675	0.684805	-0.546235
6659			level4	Diclobutrazol	7.07842415043207	329.247	307.5	POS										1.71751e-06	4.64686e-06	2.08687e-06	2.81708e-06	1.39579e-05	7.26919e-06	1.48926e-05	1.20399e-05	1.38625	0.0230243	0.196259	4.27389	2.09555
6664			level4			474.328	307.5	POS										4.05953e-07	1.49103e-06	6.14832e-09	6.34379e-07	5.58824e-06	3.22277e-06	5.04291e-06	4.61797e-06	1.09085	0.00907992	0.144796	7.27952	2.86384
6674			level4	Meclofemate sodium	16.4190481578381	319.143	307.3	POS										0.000376426	0.000321837	0.000273958	0.000324073	0.000493624	0.000477159	0.000412778	0.000461187	1.32879	0.0236179	0.197173	1.42309	0.509032
6675			level4	Zamivir	1.27411228916001	333.317	307.3	POS										4.8004e-07	2.22876e-07	3.13841e-07	3.38919e-07	4.02019e-06	3.34701e-06	2.7199e-06	3.36237e-06	1.5241	0.00139149	0.0845699	9.92086	3.31047
6676			level4			473.325	307.3	POS										1.38608e-06	6.49938e-06	2.23685e-06	3.3741e-06	2.24155e-05	1.31944e-05	2.14384e-05	1.90161e-05	1.38348	0.00927692	0.145855	5.6359	2.49465
6683			level4	Tolylfluanid	-10.875524971829	348.26	307.2	POS										3.17962e-07	1.74875e-06	8.36812e-07	9.6784e-07	2.78865e-06	3.05546e-06	2.45589e-06	2.76667e-06	1.21763	0.0164933	0.174991	2.8586	1.51531
6685			level4	Paraoxon	2.26530278527933	276.203	307.1	POS										2.29591e-06	3.99821e-06	1.0938e-06	2.46264e-06	5.33576e-06	4.91688e-06	7.98646e-06	6.0797e-06	1.20479	0.0473406	0.237455	2.46877	1.30379
6695			level4	o-Raffinose	24.4637699673785	439.356	307	POS										3.79761e-06	1.40488e-05	1.40883e-05	1.06449e-05	3.61925e-05	2.48485e-05	3.30292e-05	3.13567e-05	1.25681	0.0125938	0.160854	2.9457	1.55861
6696			level4			495.326	307	POS										6.13996e-06	9.25967e-06	6.5781e-06	7.32591e-06	2.73643e-05	1.85323e-05	2.38773e-05	2.3258e-05	1.49206	0.00439627	0.115221	3.17476	1.66665
6698			level4			526.374	307	POS										5.46035e-06	6.19336e-06	7.95143e-06	6.53505e-06	2.22075e-05	1.65793e-05	2.53734e-05	2.13867e-05	1.50449	0.00515497	0.122188	3.27262	1.71045
6699			level4	3-Carboxy-1-hydroxypropyl-ThPP	-15.8827310425227	528.402	307	POS										1.51763e-07	3.54871e-07	6.14832e-09	1.70927e-07	6.6563e-07	6.16107e-07	7.92388e-07	6.91375e-07	1.04184	0.0102766	0.15045	4.04485	2.01609
6719			level4			458.368	306.9	POS										6.644e-07	1.60204e-06	9.19997e-07	1.06215e-06	3.53513e-06	2.7424e-06	4.06105e-06	3.44619e-06	1.41296	0.00736544	0.136863	3.24456	1.69802
6720			level4			494.274	306.9	POS										2.25679e-05	3.01557e-05	2.40347e-05	2.55861e-05	2.10186e-06	2.89473e-06	2.29987e-06	2.43215e-06	1.55001	0.00935305	0.146154	0.0950575	-3.39506
6721			level4			494.323	306.9	POS										2.78665e-05	3.58972e-05	3.01724e-05	3.13121e-05	0.000109282	7.52662e-05	9.6977e-05	9.38416e-05	1.51331	0.00362211	0.111484	2.99698	1.58351
6726			level4			624.232	306.9	POS										1.82109e-05	1.11319e-05	1.00093e-05	1.31174e-05	1.6887e-06	1.26033e-06	9.23238e-07	1.29076e-06	1.52192	0.0431175	0.237455	0.0984006	-3.34519
6741			level4			585.475	306.8	POS										7.16192e-06	1.03847e-05	1.2037e-05	9.86123e-06	2.63103e-05	1.75076e-05	2.78783e-05	2.38987e-05	1.41128	0.0164575	0.17492	2.4235	1.27709
6763			level4			530.412	306.4	POS										1.24263e-06	3.35391e-06	2.47589e-06	2.35748e-06	1.42944e-05	8.95362e-06	7.81399e-06	1.0354e-05	1.41586	0.0186581	0.181551	4.39199	2.13487
6767			level4			802.52	306.4	POS										2.3655e-06	3.26578e-06	7.05848e-07	2.11238e-06	9.56258e-06	5.53395e-06	8.65518e-06	7.91724e-06	1.28283	0.0154305	0.17164	3.74802	1.90613
6768			level4			804.535	306.4	POS										4.48305e-06	6.10918e-06	3.30229e-06	4.6315e-06	1.37489e-05	9.26686e-06	9.78464e-06	1.09335e-05	1.38821	0.0181539	0.180052	2.36067	1.2392
6781			level4			529.408	306.3	POS										6.05372e-06	1.31318e-05	1.00992e-05	9.76156e-06	5.2359e-05	3.26579e-05	2.78894e-05	3.76354e-05	1.42608	0.0229677	0.196171	3.85547	1.94691
6782			level4			584.471	306.3	POS										2.49903e-05	3.5802e-05	3.9085e-05	3.32924e-05	8.43379e-05	5.84552e-05	9.12705e-05	7.80212e-05	1.42348	0.0146079	0.168336	2.34351	1.22867
6821			level4			677.533	306.1	POS										4.11644e-06	7.21067e-06	2.6026e-06	4.64324e-06	1.50813e-05	1.27846e-05	1.03215e-05	1.27291e-05	1.33374	0.0138285	0.165442	2.74144	1.45493
6824			level4			732.447	306.1	POS										1.04014e-07	5.71317e-07	6.14832e-09	2.2716e-07	1.0747e-06	7.55206e-07	1.20053e-06	1.01015e-06	1.07833	0.0232782	0.196484	4.44685	2.15278
6832			level4	Glucose lactate glutamate	6.58889222218312	414.342	306	POS										3.49839e-07	2.38681e-06	7.75618e-07	1.17075e-06	5.31742e-06	5.96457e-06	4.72256e-06	5.33485e-06	1.31587	0.0043633	0.115191	4.55676	2.18801
6840			level4			705.41	306	POS										2.66219e-05	4.35072e-05	2.89311e-05	3.30201e-05	3.82517e-06	1.95873e-05	1.00653e-05	1.11593e-05	1.23363	0.0353618	0.226956	0.337954	-1.5651
6853			level4			637.449	305.8	POS										1.20145e-06	2.51413e-06	1.58312e-06	1.76623e-06	5.7023e-06	4.4637e-06	1.01537e-05	6.77324e-06	1.39875	0.0474854	0.237455	3.83485	1.93917
6865			level4			577.279	305.7	POS										1.72764e-05	1.28782e-05	1.17666e-05	1.39737e-05	4.04175e-06	5.7755e-06	5.03308e-06	4.95011e-06	1.49439	0.00679179	0.133229	0.354244	-1.49719
6866			level4			593.122	305.7	POS										5.44078e-09	5.69788e-09	6.14832e-09	5.76233e-09	6.85906e-09	6.19632e-09	6.61583e-09	6.55707e-09	1.27832	0.048516	0.237455	1.13792	0.1864
6875			level4			148.443	305.6	POS										5.44078e-09	5.69788e-09	6.14832e-09	5.76233e-09	6.85906e-09	6.19632e-09	6.61583e-09	6.55707e-09	1.27832	0.048516	0.237455	1.13792	0.1864
6883			level4			336.107	305.6	POS										5.30705e-05	3.53139e-05	4.78879e-05	4.54241e-05	2.03984e-05	2.23195e-05	1.33874e-05	1.87017e-05	1.42203	0.010768	0.152782	0.411714	-1.28029
6888			level4	Bispyribac	4.93391472687683	431.378	305.6	POS										1.17904e-05	1.70454e-05	5.85762e-06	1.15645e-05	5.0369e-05	2.73548e-05	4.52713e-05	4.09984e-05	1.35628	0.0186623	0.181551	3.54519	1.82586
6891			level4			530.441	305.6	POS										1.80666e-06	1.24247e-06	3.68479e-06	2.24464e-06	1.51187e-05	9.63973e-06	7.70682e-06	1.08217e-05	1.42411	0.0214565	0.191415	4.82115	2.26938
6892			level4			578.249	305.6	POS										3.68905e-06	2.21603e-06	3.07718e-06	2.99409e-06	7.45716e-07	1.08875e-06	3.8238e-07	7.3895e-07	1.4145	0.00888275	0.143594	0.246803	-2.01857
6893			level4			578.28	305.6	POS										4.64751e-06	2.7829e-06	3.74988e-06	3.72676e-06	1.16569e-06	1.07724e-06	5.77591e-07	9.40174e-07	1.4545	0.0080428	0.13972	0.252276	-1.98692
6896			level4			593.14	305.6	POS										5.44078e-09	5.69788e-09	6.14832e-09	5.76233e-09	6.85906e-09	6.19632e-09	6.61583e-09	6.55707e-09	1.27832	0.048516	0.237455	1.13792	0.1864
6901			level4			593.323	305.6	POS										4.62831e-06	5.24005e-06	2.10849e-06	3.99229e-06	0.000503122	0.000378074	0.000488766	0.000456654	1.5427	0.0075043	0.137109	114.384	6.83774
6906			level4			594.214	305.6	POS										5.42789e-06	2.42712e-06	2.44029e-06	3.43177e-06	4.933e-07	6.19632e-09	6.61583e-09	1.68704e-07	1.32079	0.0320669	0.220108	0.0491596	-4.34638
6926			level4	TRICIRIBINE PHOSPHATE	-19.9271524502516	401.287	305.5	POS										1.98729e-06	9.91593e-07	1.26761e-06	1.4155e-06	3.33652e-06	4.49167e-06	6.7655e-06	4.86456e-06	1.41365	0.0303701	0.215668	3.43665	1.781
6929			level4	2-Methyl-1-hydroxypropyl-ThPP	17.1352142786377	498.436	305.5	POS										8.04644e-07	8.15627e-07	9.79397e-07	8.66556e-07	1.99524e-06	1.20675e-06	1.74993e-06	1.65064e-06	1.39083	0.030766	0.21679	1.90483	0.929659
6938			level4	Chlorohaloperidol	-23.9003874388152	393.318	305.4	POS										2.02185e-06	2.13713e-06	2.32536e-06	2.16145e-06	7.27249e-06	9.951e-06	1.03174e-05	9.1803e-06	1.53636	0.0175131	0.177809	4.24729	2.08654
6949			level4			392.315	305.3	POS										7.92021e-06	8.06175e-06	5.55011e-06	7.17736e-06	2.55431e-05	3.94276e-05	3.99402e-05	3.49703e-05	1.50879	0.00437426	0.115191	4.8723	2.2846
6950			level4	Droxicam	-5.81127217778424	358.345	305.3	POS										1.02484e-06	5.67303e-07	1.33217e-06	9.7477e-07	1.75568e-06	2.23823e-06	1.58637e-06	1.86009e-06	1.23567	0.0402304	0.236415	1.90824	0.93224
6954			level4			628.496	305.3	POS										1.95306e-05	3.20895e-05	3.58515e-05	2.91572e-05	7.3387e-05	5.29303e-05	8.29727e-05	6.97633e-05	1.3888	0.016075	0.174035	2.39266	1.25862
6957			level4	L-Galacturonic acid calcium salt	-19.6476575434418	427.34	305.2	POS										1.74192e-06	3.83253e-06	4.14174e-06	3.23873e-06	7.7474e-06	6.27669e-06	7.57988e-06	7.20132e-06	1.30346	0.0110334	0.154122	2.2235	1.15283
6958			level4			428.322	305.2	POS										3.67717e-07	2.47825e-07	1.53309e-07	2.56283e-07	1.11585e-06	7.3645e-07	1.49409e-06	1.11546e-06	1.42617	0.0194485	0.184628	4.35246	2.12183
6959			level4			637.279	305.2	POS										6.85056e-05	7.63582e-05	6.66879e-05	7.05172e-05	0.000132619	0.000151768	9.10499e-05	0.000125146	1.34139	0.0396587	0.235244	1.77468	0.827562
6961			level4			311.087	305.1	POS										2.60708e-06	4.51981e-06	1.44713e-06	2.85801e-06	7.09778e-06	1.14459e-05	7.30515e-06	8.61626e-06	1.31095	0.0263791	0.205183	3.01478	1.59205
6971			level4			413.324	305	POS										2.36593e-06	1.07861e-06	3.00237e-06	2.14897e-06	2.04e-05	2.95344e-05	1.44902e-05	2.14749e-05	1.48761	0.0455719	0.237455	9.99312	3.32093
6972			level4			537.373	305	POS										3.47894e-05	2.99858e-05	2.93754e-05	3.13835e-05	0.00012401	8.52242e-05	9.44695e-05	0.000101235	1.52403	0.0248764	0.20092	3.22572	1.68962
6973			level4			538.375	305	POS										4.88597e-06	5.21519e-06	3.54492e-06	4.54869e-06	2.16581e-05	1.41236e-05	1.44308e-05	1.67375e-05	1.49522	0.00835293	0.141211	3.67963	1.87956
6975			level4			628.456	305	POS										2.39268e-05	4.25754e-05	3.83519e-05	3.49514e-05	8.3217e-05	5.68996e-05	9.39862e-05	7.80343e-05	1.35401	0.0253355	0.202361	2.23265	1.15876
6980			level4			469.311	304.9	POS										1.11528e-06	2.18819e-06	1.33422e-06	1.5459e-06	8.59094e-06	6.93972e-06	5.68555e-06	7.07207e-06	1.48555	0.00360705	0.111484	4.57472	2.19368
6998			level4	Azvudine	19.64691866129	287.236	304.7	POS										9.95343e-07	4.63486e-07	2.82806e-06	1.42896e-06	5.62935e-06	3.28038e-06	4.96073e-06	4.62348e-06	1.24831	0.0331328	0.222247	3.23555	1.69401
7000			level4			373.311	304.7	POS										1.6615e-06	1.39292e-06	1.74589e-06	1.6001e-06	4.09185e-06	3.31319e-06	3.65003e-06	3.68503e-06	1.52611	0.00111804	0.0798173	2.30299	1.20351
7004			level4			468.307	304.7	POS										7.55386e-06	1.33211e-05	9.90366e-06	1.02595e-05	3.86738e-05	3.06773e-05	2.86623e-05	3.26711e-05	1.4806	0.00300894	0.105341	3.18447	1.67105
7006			level4			506.274	304.6	POS										2.966e-06	4.11767e-06	2.05587e-06	3.04651e-06	7.5315e-06	5.52505e-06	8.65711e-06	7.23789e-06	1.36304	0.0185493	0.181283	2.37579	1.24841
7013			level4			74.7252	304.4	POS										3.93703e-07	7.60989e-07	6.63263e-07	6.05985e-07	2.08719e-06	1.4306e-06	2.8494e-06	2.12239e-06	1.42225	0.023313	0.196493	3.50239	1.80834
7017			level4			451.378	304.4	POS										4.69348e-07	3.79994e-07	1.47587e-06	7.75072e-07	3.99532e-06	1.86275e-06	2.70082e-06	2.85296e-06	1.3153	0.0434724	0.237455	3.6809	1.88006
7034			level4			669.49	304.3	POS										5.16282e-06	9.20088e-07	3.404e-06	3.1623e-06	1.21517e-05	1.03453e-05	6.22168e-06	9.57291e-06	1.18812	0.0403055	0.236617	3.0272	1.59798
7035			level4			672.523	304.3	POS										1.73998e-05	2.37968e-05	2.73643e-05	2.28536e-05	5.52307e-05	4.04896e-05	7.29869e-05	5.62358e-05	1.4074	0.0274357	0.208087	2.46069	1.29906
7036			level4			673.527	304.3	POS										6.14136e-06	8.45337e-06	1.00624e-05	8.21905e-06	2.01233e-05	1.44312e-05	2.5523e-05	2.00259e-05	1.40244	0.0254873	0.202953	2.43652	1.28482
7039			level4	3,4-dihydroxy-5-all-trans-nonaprenylbenzoate	12.5601519216941	767.202	304.3	POS										5.44078e-09	5.69788e-09	6.14832e-09	5.76233e-09	6.85906e-09	6.19632e-09	6.61583e-09	6.55707e-09	1.27832	0.048516	0.237455	1.13792	0.1864
7041			level4			279.278	304.2	POS										6.36172e-06	4.71672e-06	3.16252e-06	4.74699e-06	5.05673e-07	1.87013e-07	1.3381e-07	2.75499e-07	1.49225	0.0382856	0.23334	0.0580365	-4.10689
7058			level4			659.297	304.1	POS										5.44078e-09	5.69788e-09	6.14832e-09	5.76233e-09	6.85906e-09	6.19632e-09	6.61583e-09	6.55707e-09	1.27832	0.048516	0.237455	1.13792	0.1864
7062			level4			443.351	304	POS										7.97079e-06	1.15949e-05	9.35982e-06	9.64184e-06	3.33259e-05	2.31488e-05	2.04427e-05	2.56392e-05	1.45441	0.0169782	0.176219	2.65915	1.41097
7066			level4			73.0325	303.9	POS										5.44078e-09	5.69788e-09	6.14832e-09	5.76233e-09	6.85906e-09	6.19632e-09	6.61583e-09	6.55707e-09	1.27832	0.048516	0.237455	1.13792	0.1864
7071			level4			390.299	303.7	POS										2.76265e-06	3.28402e-06	4.55875e-06	3.53514e-06	2.13889e-06	1.73303e-06	1.95753e-06	1.94315e-06	1.35497	0.0434832	0.237455	0.549667	-0.863371
7072			level4	Melarsoprol	-2.45168245013936	399.345	303.7	POS										1.51689e-06	8.81959e-07	1.98707e-06	1.46197e-06	3.27951e-06	2.99876e-06	2.77395e-06	3.01741e-06	1.33109	0.0115225	0.156455	2.06393	1.04539
7083			level4			397.293	303.6	POS										3.40764e-06	5.1137e-06	3.40104e-06	3.97413e-06	1.79651e-05	1.22608e-05	8.1432e-06	1.27897e-05	1.40462	0.0385693	0.233738	3.21825	1.68628
7086			level4			458.271	303.6	POS										4.63363e-06	2.19978e-05	2.59707e-06	9.74282e-06	3.09344e-05	2.88772e-05	4.88252e-05	3.62122e-05	1.21831	0.0400696	0.236076	3.71681	1.89407
7087			level4			473.361	303.6	POS										1.60207e-06	3.27931e-06	2.66222e-06	2.51453e-06	6.43206e-06	7.37487e-06	1.11021e-05	8.30302e-06	1.42259	0.0184646	0.180973	3.30201	1.72335
7091			level4			624.268	303.6	POS										1.05195e-05	6.70311e-06	8.48963e-06	8.57075e-06	1.72308e-05	1.7668e-05	1.24256e-05	1.57748e-05	1.35825	0.0230414	0.196259	1.84054	0.880129
7099			level4			409.272	303.4	POS										3.87057e-06	2.44939e-06	1.08931e-05	5.73768e-06	1.61544e-05	1.16782e-05	1.55454e-05	1.44593e-05	1.22592	0.0422271	0.237455	2.52006	1.33346
7108			level4			686.322	303.4	POS										5.44078e-09	2.30696e-07	6.14832e-09	8.07617e-08	1.03481e-06	5.51865e-07	1.36995e-06	9.85541e-07	1.29304	0.0220873	0.193336	12.2031	3.60917
7109			level4			987.606	303.4	POS										2.16211e-06	3.18701e-06	2.07594e-06	2.47502e-06	1.04177e-06	1.35593e-07	3.72708e-07	5.1669e-07	1.30317	0.0119826	0.15864	0.208762	-2.26007
7110			level4	5-(3',4'-Dihydroxyphenyl)-γ-valerolactone 4'-sulfate	-15.876088389382	289.273	303.3	POS										1.39122e-06	1.48652e-06	1.86597e-06	1.58124e-06	5.70801e-06	2.98422e-06	3.73535e-06	4.14253e-06	1.42742	0.0360684	0.228681	2.6198	1.38946
7112			level4			333.298	303.3	POS										5.46995e-06	5.92081e-06	2.12645e-06	4.50573e-06	1.69293e-05	8.79436e-06	1.59023e-05	1.38753e-05	1.29284	0.029433	0.212878	3.07948	1.62269
7116			level4			541.391	303.3	POS										1.83331e-06	2.31725e-06	1.97119e-06	2.04058e-06	4.48184e-06	3.26008e-06	4.52545e-06	4.08912e-06	1.46093	0.00954303	0.147093	2.0039	1.00281
7122			level4	Alginic acid	22.292651726563	419.244	303.2	POS										4.91788e-06	1.99557e-06	2.7715e-06	3.22831e-06	4.86881e-07	6.61478e-07	6.61583e-09	3.84992e-07	1.13079	0.0337073	0.223665	0.119255	-3.06788
7124			level4			685.261	303.2	POS										1.73663e-06	2.93593e-06	4.2489e-07	1.69915e-06	4.91338e-06	3.3943e-06	6.24265e-06	4.85011e-06	1.12404	0.0453331	0.237455	2.85443	1.5132
7126			level4	Samaderin A	-1.14006549182278	331.339	303.1	POS										3.45468e-05	2.6177e-05	2.60189e-05	2.89142e-05	7.70994e-06	5.70737e-06	8.4579e-06	7.29174e-06	1.51832	0.00180633	0.091771	0.252185	-1.98745
7127			level4			474.248	303.1	POS										1.5762e-07	5.65069e-06	1.46221e-07	1.98484e-06	1.22356e-05	1.21292e-05	1.81863e-05	1.41837e-05	1.244	0.0108659	0.153112	7.146	2.83714
7129			level4			828.536	303.1	POS										6.52946e-06	3.60641e-06	4.3317e-06	4.82252e-06	2.717e-05	1.46402e-05	1.46251e-05	1.88118e-05	1.4478	0.0306223	0.216412	3.90082	1.96378
7131			level4	Mecadox	13.8179044712779	263.236	303	POS										2.7004e-05	2.32763e-05	2.09479e-05	2.37427e-05	1.54485e-05	1.92988e-05	1.36518e-05	1.6133e-05	1.32196	0.0349555	0.225886	0.679494	-0.557467
7133			level4	3,3'-Biflaviolin	-9.44849878405316	411.291	303	POS										1.05777e-06	9.42153e-07	1.19555e-06	1.06516e-06	2.95538e-06	1.79244e-06	3.30378e-06	2.68387e-06	1.43117	0.0249412	0.201053	2.51969	1.33325
7134			level4			427.301	303	POS										3.69058e-06	1.36993e-06	5.58742e-07	1.87308e-06	5.9728e-06	7.84627e-06	9.3454e-06	7.72149e-06	1.28832	0.0124434	0.160163	4.12234	2.04346
7136			level4	2-O-[2-O-(alpha-D-Mannopyranosyl)-alpha-D-glucopyranosyl]-3-phospho-D-glycerate	23.3637131754157	511.358	303	POS										6.71246e-06	7.08737e-06	6.93868e-06	6.91284e-06	3.42264e-05	2.88887e-05	2.04106e-05	2.78419e-05	1.51801	0.0349271	0.225796	4.02757	2.00991
7143			level4			637.3	303	POS										7.11799e-05	7.89881e-05	7.02554e-05	7.34744e-05	0.000155768	0.000124003	0.000109269	0.00012968	1.44547	0.0159216	0.17346	1.76497	0.81964
7144			level4			638.304	303	POS										1.86173e-05	2.23104e-05	1.95291e-05	2.01523e-05	4.42433e-05	3.04613e-05	3.01212e-05	3.4942e-05	1.38491	0.0364868	0.229605	1.7339	0.794017
7149			level4			692.446	303	POS										5.36088e-07	3.50249e-07	9.216e-08	3.26166e-07	3.65198e-06	2.02342e-06	1.53633e-06	2.40391e-06	1.35915	0.0333983	0.222852	7.37022	2.88171
7157			level4	Levosimendan	7.21908830551427	281.294	302.9	POS										1.24747e-05	1.63088e-05	9.18746e-06	1.2657e-05	5.92952e-06	8.0469e-06	5.23715e-06	6.40453e-06	1.33683	0.0482858	0.237455	0.506006	-0.982772
7161			level4			602.489	302.9	POS										3.62389e-06	2.39557e-06	1.83493e-06	2.61813e-06	5.24066e-06	3.92717e-06	5.85551e-06	5.00778e-06	1.28392	0.036983	0.230504	1.91273	0.935634
7174			level4			448.201	302.8	POS										0.000103428	7.30439e-05	7.81357e-05	8.48691e-05	5.8794e-05	5.10209e-05	3.75972e-05	4.91373e-05	1.32763	0.0336717	0.223605	0.578978	-0.78842
7181			level4			623.312	302.8	POS										8.93991e-06	7.18318e-06	8.47127e-06	8.19812e-06	1.89316e-05	1.25828e-05	1.20929e-05	1.45358e-05	1.35971	0.0488589	0.238157	1.77306	0.826244
7185			level4			365.267	302.7	POS										7.76022e-06	1.23812e-05	6.08484e-06	8.74208e-06	3.3221e-05	3.14163e-05	4.79988e-05	3.75454e-05	1.47239	0.00668866	0.132495	4.29479	2.10259
7188			level4	Voricozole	21.5378581520597	350.325	302.6	POS										9.13e-06	1.07202e-05	1.16127e-05	1.04876e-05	3.41994e-05	1.8781e-05	2.63423e-05	2.64409e-05	1.44344	0.0240715	0.198649	2.52115	1.33408
7214			level4	Benzoic acid 2-(acetyloxy)-3-[(nitrooxy)methyl]phenyl ester	-2.3442405215971	332.286	302.3	POS										1.89072e-06	1.13315e-06	2.02401e-06	1.68263e-06	3.67696e-05	2.81467e-05	2.10176e-05	2.86446e-05	1.53686	0.0269898	0.206963	17.0237	4.08948
7218			level4	Ethidium bromide	-1.96952835805013	395.314	302.3	POS										2.65657e-06	4.9028e-06	2.86552e-06	3.47496e-06	6.15362e-06	5.15765e-06	6.02149e-06	5.77759e-06	1.24437	0.0421304	0.237455	1.66263	0.733469
7220			level4			428.227	302.3	POS										5.44078e-09	5.69788e-09	6.14832e-09	5.76233e-09	6.85906e-09	6.19632e-09	6.61583e-09	6.55707e-09	1.27832	0.048516	0.237455	1.13792	0.1864
7222			level4	Riboflavin cyclic-4',5'-phosphate	5.98500896005542	439.338	302.3	POS										6.49973e-07	2.16572e-06	8.84209e-07	1.2333e-06	5.00975e-06	3.11645e-06	4.29902e-06	4.14174e-06	1.33973	0.0160354	0.173949	3.35826	1.74771
7223			level4			458.361	302.3	POS										2.48961e-07	4.88832e-07	4.05071e-07	3.80955e-07	9.93812e-07	1.45511e-06	2.30042e-06	1.58311e-06	1.4199	0.0365548	0.229736	4.15565	2.05507
7225			level4			492.353	302.3	POS										4.80475e-07	1.67227e-06	1.2713e-06	1.14135e-06	5.1483e-06	4.46434e-06	8.26242e-06	5.95835e-06	1.40208	0.0168477	0.17591	5.22046	2.38418
7232			level4			639.309	302.3	POS										2.61598e-06	3.32454e-06	2.94043e-06	2.96032e-06	6.94942e-06	4.83001e-06	4.87313e-06	5.55085e-06	1.42084	0.0236979	0.197464	1.87509	0.906959
7236			level4			1103.49	302.3	POS										3.16413e-06	1.14432e-05	6.82851e-06	7.14527e-06	2.80058e-05	1.45259e-05	2.65171e-05	2.30163e-05	1.28669	0.0315699	0.218702	3.22119	1.68759
7243			level4			459.204	302.1	POS										1.35999e-06	7.67733e-07	7.54062e-07	9.60597e-07	2.67965e-06	5.16943e-06	3.65043e-06	3.83317e-06	1.44618	0.0187428	0.18183	3.99041	1.99654
7245			level4			627.36	302.1	POS										1.01927e-05	6.89833e-06	6.57342e-06	7.88815e-06	2.00432e-06	5.6424e-06	2.28854e-06	3.31175e-06	1.26336	0.0495916	0.239827	0.419839	-1.25209
7261			level4			783.301	301.9	POS										9.04704e-07	4.64455e-06	5.20728e-06	3.58551e-06	1.45319e-05	1.04363e-05	1.05971e-05	1.18551e-05	1.21585	0.0121716	0.159173	3.30639	1.72526
7268			level4	Kaltostat	0.0587472229384978	399.324	301.8	POS										1.29483e-06	2.99252e-06	1.33815e-06	1.87517e-06	9.5271e-06	4.34535e-06	1.11894e-05	8.35396e-06	1.37172	0.0386272	0.233738	4.45505	2.15544
7273			level4			378.299	301.7	POS										2.62464e-06	3.63514e-06	1.80168e-06	2.68715e-06	7.9386e-06	1.63813e-05	1.47711e-05	1.30303e-05	1.44393	0.0173156	0.17709	4.84913	2.27772
7274			level4			336.26	301.7	POS										0.000101154	5.44981e-05	7.60182e-05	7.72233e-05	2.99637e-05	1.98451e-05	2.15935e-05	2.38008e-05	1.45176	0.0181413	0.180022	0.308207	-1.69803
7275			level4	Pentetic acid	-12.3976417888152	394.351	301.7	POS										1.8127e-05	2.65814e-05	3.05105e-05	2.5073e-05	7.72246e-05	4.11733e-05	6.35051e-05	6.06343e-05	1.36891	0.03299	0.221897	2.41831	1.274
7276			level4	Pentetic acid	2.60176077734588	394.357	301.7	POS										1.51119e-05	2.31812e-05	2.4967e-05	2.10867e-05	7.69234e-05	3.46672e-05	6.3674e-05	5.84215e-05	1.35421	0.0437867	0.237455	2.77054	1.47017
7277			level4	Sivifene	8.93486127546097	395.354	301.7	POS										5.10931e-06	5.43752e-06	6.73446e-06	5.76043e-06	1.85068e-05	9.52609e-06	1.48898e-05	1.43076e-05	1.41104	0.0323241	0.220612	2.48377	1.31253
7282			level4			445.293	301.7	POS										1.60197e-06	1.10346e-06	1.45755e-06	1.38766e-06	3.36437e-06	3.38744e-06	3.36158e-06	3.37113e-06	1.5149	0.00541434	0.123822	2.42936	1.28058
7296			level4			311.203	301.6	POS										2.69689e-06	7.84472e-06	2.64171e-06	4.39444e-06	1.13517e-05	1.0143e-05	1.62222e-05	1.25723e-05	1.29064	0.0321165	0.220108	2.86095	1.51649
7303			level4			459.309	301.6	POS										1.97967e-06	3.63579e-06	2.74903e-06	2.78816e-06	6.95481e-06	6.38316e-06	5.31238e-06	6.21679e-06	1.40554	0.00722298	0.13645	2.22971	1.15686
7312			level4			796.518	301.6	POS										1.43531e-05	1.30132e-05	1.11562e-05	1.28408e-05	8.77138e-07	1.90799e-06	7.55231e-07	1.18012e-06	1.51848	0.000304846	0.0555915	0.0919037	-3.44373
7321			level4	(2S,3R)-2-[(1R)-1-[3,5-bis(trifluoromethyl)phenyl]ethoxy]-3-(4-fluorophenyl)morpholine	-0.861092870073872	438.358	301.4	POS										1.82767e-05	2.20586e-05	2.34405e-05	2.12586e-05	8.25239e-07	1.00311e-06	2.37125e-06	1.39987e-06	1.51322	0.000253587	0.0533439	0.0658493	-3.92469
7337			level4			659.465	301.3	POS										9.52812e-06	8.79313e-06	9.32247e-06	9.21457e-06	2.22946e-05	1.86609e-05	2.08814e-05	2.06123e-05	1.54409	0.000456003	0.0615671	2.23692	1.16152
7339			level4			797.521	301.3	POS										5.98002e-06	5.04098e-06	4.93925e-06	5.32008e-06	5.59455e-07	1.71137e-07	6.61583e-09	2.45736e-07	1.31251	0.000163061	0.0496389	0.0461903	-4.43627
7341			level4	5-Carboxyfluorescein	4.31392994918443	377.325	301.2	POS										4.92753e-06	7.08732e-06	8.16723e-06	6.72736e-06	2.4719e-05	1.40537e-05	1.98851e-05	1.95526e-05	1.44167	0.0164793	0.174977	2.90643	1.53925
7342			level4	Hibifolin	-10.6735765968634	495.363	301.2	POS										6.52193e-07	1.32004e-06	8.11688e-07	9.27973e-07	8.29332e-06	5.41411e-06	4.93573e-06	6.21439e-06	1.49876	0.00775602	0.137514	6.69673	2.74346
7346			level4			798.359	301.2	POS										5.67256e-06	9.36733e-06	7.27553e-06	7.43847e-06	1.95379e-05	1.16385e-05	1.58696e-05	1.5682e-05	1.35866	0.0307733	0.21679	2.10823	1.07603
7347			level4	4-Nitrophenyl 4-guanidinobenzoate	24.7220871603712	301.289	301.1	POS										1.16696e-06	8.1402e-07	1.06451e-06	1.01516e-06	6.85906e-09	6.19632e-09	6.61583e-09	6.55707e-09	1.55437	0.0106304	0.152052	0.00645913	-7.27445
7352			level4			750.305	301.1	POS										4.3626e-06	3.41846e-06	4.32553e-06	4.03553e-06	2.86578e-06	2.73447e-06	1.35922e-06	2.31982e-06	1.18998	0.0400075	0.23594	0.574849	-0.798744
7357			level4			396.309	301	POS										7.8454e-07	2.43111e-06	1.19896e-06	1.47154e-06	5.56121e-06	4.29745e-06	5.49283e-06	5.11716e-06	1.38543	0.00476127	0.118778	3.47743	1.79802
7358			level4	Pyrazolopyridine analog	-23.9452350045537	409.288	301	POS										2.24627e-06	3.22731e-06	1.35509e-06	2.27622e-06	3.77892e-06	3.88372e-06	4.25717e-06	3.97327e-06	1.18596	0.0387254	0.233857	1.74555	0.803685
7359			level4	Loquatoside	-21.1609917466161	439.38	301	POS										9.79201e-06	1.07196e-05	1.46433e-05	1.17183e-05	3.12484e-05	1.95624e-05	2.6223e-05	2.56779e-05	1.41974	0.0194979	0.184724	2.19126	1.13176
7360			level4			470.273	301	POS										4.63803e-07	6.57595e-07	1.44893e-07	4.22097e-07	1.41326e-06	9.91021e-07	1.84652e-06	1.41694e-06	1.25066	0.0261449	0.204615	3.35689	1.74713
7367			level4			620.451	301	POS										2.71087e-06	8.5134e-06	8.3032e-07	4.0182e-06	2.03505e-05	1.53662e-05	3.27485e-05	2.28217e-05	1.27904	0.0293418	0.212682	5.6796	2.50579
7368			level4			631.338	301	POS										1.99961e-06	1.42742e-06	2.7641e-06	2.06371e-06	7.6777e-06	4.48342e-06	7.66605e-06	6.60906e-06	1.43325	0.0158866	0.17346	3.20251	1.6792
7370			level4			667.468	301	POS										9.20522e-06	6.8633e-06	7.2318e-06	7.76677e-06	2.89127e-05	2.96753e-05	3.45513e-05	3.10464e-05	1.5401	0.000260085	0.0533439	3.99734	1.99904
7379			level4			438.377	300.9	POS										3.19153e-05	4.49055e-05	4.92271e-05	4.2016e-05	0.000128722	7.57314e-05	0.000105587	0.000103347	1.42313	0.019323	0.184283	2.4597	1.29848
7380			level4			447.309	300.9	POS										8.57306e-07	2.19735e-06	9.19729e-07	1.32479e-06	7.6482e-06	5.64222e-06	8.15701e-06	7.14914e-06	1.45785	0.00273833	0.103009	5.39642	2.432
7381			level4			494.359	300.9	POS										2.08022e-06	6.16929e-06	3.87895e-06	4.04282e-06	3.16897e-05	1.95748e-05	2.27537e-05	2.46727e-05	1.45982	0.00566176	0.125312	6.10286	2.60949
7383			level4			583.473	300.9	POS										5.44078e-09	5.69788e-09	6.14832e-09	5.76233e-09	6.85906e-09	6.19632e-09	6.61583e-09	6.55707e-09	1.27832	0.048516	0.237455	1.13792	0.1864
7389			level4	6-Methoxytaxifolin	24.3013591098779	335.293	300.8	POS										4.76462e-06	5.31313e-06	6.16263e-06	5.41346e-06	3.14038e-06	2.93001e-06	3.41427e-06	3.16155e-06	1.47431	0.00636178	0.13017	0.584017	-0.775918
7392			level4			449.204	300.8	POS										3.40755e-05	3.22741e-05	3.02668e-05	3.22055e-05	1.43231e-05	2.0573e-05	1.56881e-05	1.68614e-05	1.47719	0.00219593	0.0964072	0.523557	-0.93358
7394			level4			572.285	300.8	POS										1.23979e-06	1.69187e-06	1.01806e-06	1.31658e-06	6.07253e-06	1.05849e-05	1.09307e-05	9.19605e-06	1.5057	0.0354516	0.227135	6.98483	2.80422
7423			level4	Ketoconazole	-7.29464408363895	532.434	300.4	POS										2.02376e-06	2.03543e-06	1.45097e-06	1.83672e-06	7.77925e-06	1.15778e-05	1.03479e-05	9.90166e-06	1.52415	0.00207594	0.0945483	5.39095	2.43054
7431			level4			827.502	300.4	POS										3.04023e-07	4.93681e-07	4.90916e-07	4.2954e-07	6.85906e-09	6.19632e-09	1.31222e-07	4.80925e-08	1.30475	0.00714484	0.136175	0.111963	-3.15891
7438			level4	Diethylstilbestrol diphosphate	-17.2225724358208	429.31	300.3	POS										1.80412e-06	3.35833e-06	3.08634e-06	2.7496e-06	1.1725e-05	4.75467e-06	1.17357e-05	9.40515e-06	1.33857	0.0486432	0.237609	3.42056	1.77423
7442			level4			515.393	300.3	POS										1.19404e-06	4.88675e-06	2.52622e-06	2.869e-06	1.34995e-05	8.38381e-06	9.34946e-06	1.04109e-05	1.32754	0.0166854	0.175653	3.62876	1.85947
7443			level4			533.384	300.3	POS										7.68168e-07	1.00539e-06	4.87666e-07	7.53741e-07	3.05109e-06	1.74902e-06	2.74689e-06	2.51567e-06	1.41843	0.0138342	0.165442	3.33758	1.7388
7445			level4			596.414	300.3	POS										3.76025e-07	8.67824e-07	2.16952e-06	1.13779e-06	3.81922e-06	2.624e-06	3.41314e-06	3.28545e-06	1.22527	0.0283952	0.210516	2.88757	1.52986
7448			level4			679.347	300.3	POS										5.44078e-09	5.69788e-09	6.14832e-09	5.76233e-09	6.85906e-09	6.19632e-09	6.61583e-09	6.55707e-09	1.27832	0.048516	0.237455	1.13792	0.1864
7452			level4			780.428	300.3	POS										5.44078e-09	5.69788e-09	6.14832e-09	5.76233e-09	6.85906e-09	6.19632e-09	6.61583e-09	6.55707e-09	1.27832	0.048516	0.237455	1.13792	0.1864
7453			level4	Cardiospermin	-7.54427164322207	276.26	300.2	POS										3.64339e-07	1.09856e-06	7.16235e-07	7.26378e-07	6.4967e-06	4.71679e-06	3.52686e-06	4.91345e-06	1.45673	0.00922611	0.145743	6.76432	2.75794
7454			level4			379.283	300.2	POS										6.62185e-06	8.01545e-06	9.75527e-06	8.13085e-06	1.39135e-05	1.10777e-05	1.14327e-05	1.21413e-05	1.31404	0.0343935	0.224762	1.49324	0.578445
7470			level4	Desethylenenorfloxacin	-19.4883308958852	292.284	300	POS										1.261e-06	3.40848e-06	2.81903e-06	2.49617e-06	2.03385e-05	1.12283e-05	1.1218e-05	1.42616e-05	1.44187	0.0192873	0.184112	5.71339	2.51435
7487			level4			737.23	299.9	POS										5.44078e-09	5.69788e-09	6.14832e-09	5.76233e-09	6.85906e-09	6.19632e-09	6.61583e-09	6.55707e-09	1.27832	0.048516	0.237455	1.13792	0.1864
7489			level4			321.241	299.8	POS										2.53229e-05	6.01702e-05	3.79698e-05	4.11543e-05	0.00012659	0.000102539	0.000104461	0.000111196	1.39209	0.00539344	0.123648	2.70194	1.43399
7490			level4	Malathion dicarboxylic acid	-8.30112451327998	275.257	299.8	POS										3.72135e-06	7.69006e-06	7.3135e-06	6.24164e-06	4.51483e-05	2.75606e-05	2.65691e-05	3.30927e-05	1.4732	0.0121106	0.158923	5.30192	2.40652
7497			level4	Sodium picosulfate	-23.2165154123249	482.403	299.8	POS										5.60884e-05	7.98351e-05	6.15837e-05	6.58358e-05	0.000168578	9.37686e-05	0.000135245	0.000132531	1.34299	0.0430051	0.237455	2.01305	1.00938
7512			level4	3'-(2''-Galloylglucosyl)-phloroacetophenone	15.5960427172137	483.406	299.7	POS										1.08162e-05	1.44881e-05	1.71575e-05	1.4154e-05	4.34366e-05	2.48403e-05	3.5795e-05	3.46907e-05	1.41239	0.0227127	0.195198	2.45095	1.29334
7514			level4			608.115	299.7	POS										9.08212e-07	2.598e-06	4.22678e-07	1.30963e-06	4.29921e-06	4.14059e-06	3.43244e-06	3.95741e-06	1.21514	0.020409	0.187877	3.02178	1.5954
7515			level4			612.287	299.7	POS										8.86319e-07	7.6025e-07	8.65245e-07	8.37271e-07	5.17135e-07	6.19632e-09	6.61583e-09	1.76649e-07	1.17613	0.0193933	0.184554	0.210982	-2.24481
7530			level4	Methyl nogalote	-22.6483416422319	397.345	299.6	POS										6.62006e-06	9.09151e-06	7.27835e-06	7.66331e-06	2.10422e-05	1.68148e-05	1.13488e-05	1.64019e-05	1.35764	0.0394833	0.235139	2.14032	1.09783
7557			level4			307.262	299.4	POS										7.52919e-06	1.41455e-05	8.3001e-06	9.99161e-06	1.79712e-05	1.77556e-05	1.96326e-05	1.84531e-05	1.3212	0.0175886	0.177974	1.84686	0.885078
7558			level4			319.263	299.4	POS										1.27755e-06	7.02122e-07	1.73e-06	1.23656e-06	0.000137537	8.31896e-05	0.000107158	0.000109295	1.54683	0.0204962	0.18831	88.3864	6.46575
7560			level4			551.356	299.4	POS										3.15964e-06	6.77074e-06	4.08194e-06	4.67077e-06	1.24425e-05	7.78353e-06	9.91107e-06	1.00457e-05	1.29865	0.0358682	0.228053	2.15076	1.10484
7565			level4			429.335	299.3	POS										3.46358e-06	6.05622e-06	4.84067e-06	4.78682e-06	1.45844e-05	1.42166e-05	1.59248e-05	1.49086e-05	1.49512	0.00037368	0.0576943	3.1145	1.639
7575			level4			472.341	299.1	POS										2.35276e-07	2.93469e-07	6.14832e-09	1.78298e-07	1.35598e-06	9.0652e-07	1.62679e-06	1.29643e-06	1.14484	0.00797312	0.139207	7.27116	2.86218
7579			level4			179.085	299	POS										1.28195e-06	1.25656e-06	1.71602e-06	1.41818e-06	2.94879e-06	2.99633e-06	5.28986e-06	3.745e-06	1.42241	0.0416669	0.237455	2.64071	1.40093
7594			level4			635.42	299	POS										1.93754e-07	9.10168e-07	1.33625e-07	4.12516e-07	2.65994e-06	1.05867e-06	2.92844e-06	2.21568e-06	1.27584	0.0468295	0.237455	5.37115	2.42523
7602			level4	Glutathione peroxide	24.9730210494209	338.316	298.9	POS										1.34315e-05	5.24735e-06	1.69945e-05	1.18911e-05	3.44783e-06	8.72653e-07	1.19384e-06	1.83811e-06	1.34312	0.0480479	0.237455	0.154578	-2.69359
7603			level4	4-Hydroxy-6-methylpretetramide	-4.39665218772164	382.341	298.9	POS										1.58077e-06	1.36386e-06	3.00797e-06	1.9842e-06	5.27518e-06	6.70816e-06	6.00943e-06	5.99759e-06	1.43595	0.00371979	0.111827	3.02268	1.59583
7606			level4			526.429	298.9	POS										4.71568e-05	6.46274e-05	6.89199e-05	6.02347e-05	0.000187681	0.000106981	0.000151831	0.000148831	1.42462	0.0217759	0.19262	2.47085	1.30501
7607			level4	Genistein 4'-glucuronide-7-sulfate	10.6823448959084	527.433	298.9	POS										1.35437e-05	1.81055e-05	2.10174e-05	1.75555e-05	5.87149e-05	3.13027e-05	4.52576e-05	4.50918e-05	1.40964	0.0284317	0.210569	2.56852	1.36094
7625			level4			595.291	298.7	POS										1.49744e-05	1.28091e-05	1.01879e-05	1.26571e-05	7.012e-06	3.24596e-06	7.96904e-06	6.07567e-06	1.23241	0.0301153	0.215007	0.48002	-1.05883
7627			level4			320.286	298.6	POS										2.59529e-06	5.28676e-06	5.48185e-06	4.45463e-06	2.57352e-05	1.53978e-05	1.88545e-05	1.99958e-05	1.46157	0.00809881	0.139978	4.48877	2.16632
7636			level4	Lecanoric acid	-7.46705240901765	319.283	298.4	POS										1.56063e-05	3.19567e-05	2.9101e-05	2.55547e-05	0.000142307	8.22084e-05	9.94672e-05	0.000107994	1.45772	0.0113248	0.15572	4.22601	2.0793
7637			level4	(+)-Luguine	-22.8940246972051	336.31	298.4	POS										1.55726e-05	3.00779e-05	2.93765e-05	2.5009e-05	0.000139956	8.12831e-05	9.48389e-05	0.000105359	1.46191	0.011894	0.158269	4.21286	2.0748
7638			level4			578.367	298.4	POS										2.45372e-06	2.01917e-06	1.58491e-06	2.01927e-06	1.02714e-06	2.68161e-07	7.82057e-07	6.92453e-07	1.25997	0.0168388	0.175903	0.342923	-1.54404
7641			level4	UDP-2-acetamido-2,6-dideoxy-beta-L-talose	15.2588727266318	592.371	298.4	POS										1.83008e-06	3.60233e-06	2.41261e-06	2.61501e-06	1.84897e-05	1.10774e-05	8.33192e-06	1.2633e-05	1.44645	0.0312422	0.217989	4.83096	2.27231
7644			level4			704.335	298.4	POS										5.44078e-09	5.69788e-09	6.14832e-09	5.76233e-09	6.85906e-09	6.19632e-09	6.61583e-09	6.55707e-09	1.27832	0.048516	0.237455	1.13792	0.1864
7649			level4	beta-Citryl-L-glutamate	-0.238452858087462	322.245	298.3	POS										3.9524e-06	1.24724e-05	7.21295e-06	7.87925e-06	2.60439e-05	2.00514e-05	2.03992e-05	2.21648e-05	1.32772	0.0105538	0.151661	2.81306	1.49214
7650			level4	Oxaziclomefone	6.97200249589836	377.286	298.3	POS										2.9649e-06	4.64796e-06	5.34241e-06	4.31842e-06	1.48415e-05	9.62547e-06	1.19847e-05	1.21505e-05	1.44327	0.00928138	0.145855	2.81365	1.49244
7651			level4			418.351	298.3	POS										2.8345e-07	4.28187e-07	3.16612e-07	3.4275e-07	2.13528e-07	6.19632e-09	6.61583e-09	7.54466e-08	1.18869	0.0307965	0.216858	0.220122	-2.18363
7653			level4	(2,6-dihydroxy-4-{4-hydroxy-7-methyl-11-oxo-2,8-dioxatricyclo[7.3.1.0⁵,¹³]trideca-1(12),3,5(13),6,9-pentaen-3-yl}phenoxy)dihydroxyoxo-λ⁶-sulfanylium	4.81372222496412	421.349	298.3	POS										8.1191e-07	1.29198e-06	1.98432e-06	1.36274e-06	6.18729e-06	4.82802e-06	6.18407e-06	5.73313e-06	1.46963	0.00151671	0.0866902	4.20707	2.07282
7659			level4			571.459	298.3	POS										1.48671e-05	1.95513e-05	2.31841e-05	1.92009e-05	5.85111e-05	5.18189e-05	4.70054e-05	5.24451e-05	1.50029	0.00127425	0.0825667	2.7314	1.44964
7674			level4	5-(5-Phospho-D-ribosylaminoformimino)-1-(5-phosphoribosyl)-imidazole-4-carboxamide	-10.6985420841829	578.332	298.2	POS										6.18802e-06	3.69473e-06	3.93176e-06	4.60484e-06	1.16651e-06	4.11861e-07	2.11705e-07	5.96694e-07	1.41322	0.0090543	0.144531	0.12958	-2.94809
7678			level4			636.396	298.2	POS										6.13166e-07	2.51719e-06	1.91984e-06	1.6834e-06	1.28819e-05	9.64623e-06	6.36668e-06	9.63159e-06	1.38234	0.015489	0.171873	5.72151	2.5164
7681			level4	dTDP-L-olivose	15.2600772979721	533.346	298.1	POS										1.0412e-05	2.38159e-05	1.58214e-05	1.66831e-05	4.03345e-05	2.49451e-05	3.87608e-05	3.46801e-05	1.24939	0.0450249	0.237455	2.07876	1.05572
7689			level4			570.456	298	POS										3.93437e-05	5.86815e-05	6.02022e-05	5.27425e-05	0.000177152	9.25149e-05	0.000144937	0.000138201	1.39873	0.028747	0.211207	2.62031	1.38974
7690			level4	Coenzyme F430	-12.7695280317891	907.576	298	POS										1.71264e-06	1.56683e-06	2.52103e-06	1.9335e-06	9.80561e-06	5.56803e-06	5.2949e-06	6.88951e-06	1.45583	0.0292113	0.212457	3.56323	1.83319
7696			level4			682.452	297.8	POS										7.26895e-07	1.71575e-06	2.26007e-07	8.89549e-07	1.91041e-06	2.2341e-06	2.76647e-06	2.30366e-06	1.10676	0.048476	0.237455	2.58969	1.37278
7697			level4	Oxalyl-CoA	-21.4120907334423	840.543	297.8	POS										4.55925e-06	6.66892e-06	6.68163e-06	5.96993e-06	1.2555e-06	3.13498e-06	1.47564e-06	1.95537e-06	1.38646	0.0121011	0.158923	0.327537	-1.61027
7700			level4			454.291	297.7	POS										0.000245267	0.000254939	0.000328449	0.000276219	0.000568386	0.000429587	0.000554755	0.000517576	1.45164	0.00933121	0.146061	1.87379	0.905961
7702			level4	Ellagic acid	-18.7847088248198	303.194	297.7	POS										1.66464e-06	3.21455e-06	2.8299e-06	2.5697e-06	7.76627e-06	5.60848e-06	7.27896e-06	6.88457e-06	1.42475	0.005781	0.126183	2.67914	1.42177
7704			level4	Tectorigenin 4'-sulfate	5.05724036735021	381.335	297.7	POS										1.10928e-05	1.41545e-05	2.6156e-05	1.71344e-05	5.15893e-05	3.01519e-05	5.08225e-05	4.41879e-05	1.33045	0.0321692	0.220108	2.5789	1.36676
7706			level4	1-(5-Fluoropentyl)-3-(2-iodobenzoyl)indole	-17.1764905888797	436.281	297.7	POS										2.74815e-06	3.34303e-06	4.22511e-06	3.43876e-06	5.86647e-06	4.88219e-06	5.30265e-06	5.35044e-06	1.34749	0.020638	0.188939	1.55592	0.637767
7709			level4	1-(5'-Phosphoribosyl)-5-amino-4-(N-succinocarboxamide)-imidazole	9.29684186057635	455.295	297.7	POS										5.59742e-05	5.94748e-05	7.54464e-05	6.36318e-05	0.000128959	9.9643e-05	0.000125886	0.000118163	1.45715	0.0078844	0.138496	1.85697	0.892954
7713			level4			71.0847	297.6	POS										6.21813e-07	8.29689e-07	6.87759e-07	7.13087e-07	2.0322e-06	1.26572e-06	1.60123e-06	1.63305e-06	1.44983	0.0161692	0.174052	2.29011	1.19542
7715			level4			187.096	297.6	POS										7.8863e-07	2.93598e-07	1.01414e-06	6.9879e-07	1.27945e-06	1.55554e-06	1.27061e-06	1.36853e-06	1.13191	0.0449564	0.237455	1.95843	0.9697
7718			level4			340.283	297.6	POS										1.19628e-05	5.9797e-06	7.28622e-06	8.40956e-06	1.81206e-05	1.56629e-05	2.83793e-05	2.07209e-05	1.34273	0.0456947	0.237455	2.46397	1.30098
7719			level4	Benzamide, 3,4-dichloro-N-methyl-N-(2-(1-pyrrolidinyl)cyclohexyl)-, trans-	20.0489726990006	356.314	297.6	POS										3.23035e-06	4.06309e-06	3.43179e-06	3.57508e-06	9.21347e-06	1.01428e-05	1.42305e-05	1.11956e-05	1.50514	0.00815492	0.140292	3.13157	1.64689
7732			level4	Lifitegrast	3.12504061871983	616.489	297.6	POS										1.58969e-06	2.93207e-06	1.77059e-06	2.09745e-06	1.38677e-05	5.65262e-06	1.00912e-05	9.87053e-06	1.4329	0.0321592	0.220108	4.70597	2.23449
7743			level4			600.385	297.5	POS										4.5232e-05	2.71025e-05	4.26049e-05	3.83131e-05	2.17736e-06	4.0234e-06	1.42205e-05	6.8071e-06	1.34591	0.00970215	0.147618	0.17767	-2.49273
7746			level4	UDP-N-acetylmuramate	-1.8789655355231	680.422	297.4	POS										4.15009e-07	1.99184e-06	9.28162e-07	1.11167e-06	8.91994e-06	6.23179e-06	4.5444e-06	6.56538e-06	1.38162	0.0158414	0.173307	5.90586	2.56215
7747			level4			865.384	297.4	POS										8.21634e-07	8.89323e-07	4.49522e-07	7.2016e-07	6.85906e-09	1.88087e-07	4.20994e-07	2.05313e-07	1.00328	0.0472691	0.237455	0.285094	-1.81049
7748			level4			1012.45	297.4	POS										6.0246e-06	8.5781e-06	3.18113e-06	5.92794e-06	7.22177e-07	8.21583e-07	1.79262e-06	1.11213e-06	1.40683	0.0392392	0.234875	0.187608	-2.41421
7749			level4			223.063	297.3	POS										6.20101e-07	6.0242e-07	9.18515e-07	7.13679e-07	1.82671e-07	2.58075e-07	3.84574e-07	2.75107e-07	1.37465	0.0206797	0.189048	0.385477	-1.37528
7751			level4			494.254	297.3	POS										1.18283e-06	5.65305e-05	1.80245e-06	1.98386e-05	9.86374e-05	6.87988e-05	0.000137686	0.000101707	1.18612	0.0391255	0.234711	5.12674	2.35804
7761			level4			983.442	297.2	POS										1.31552e-06	1.28763e-06	7.52412e-07	1.11852e-06	1.9319e-07	4.45494e-07	6.61583e-09	2.151e-07	1.10594	0.0154686	0.171772	0.192307	-2.37851
7778			level4			363.309	297	POS										1.4553e-05	2.81287e-05	2.88536e-05	2.38451e-05	0.000103225	6.42549e-05	9.16036e-05	8.63612e-05	1.44706	0.00738277	0.136863	3.62176	1.85669
7779			level4			380.336	297	POS										3.1902e-05	5.89715e-05	6.17354e-05	5.08696e-05	0.000208784	0.000141948	0.000196793	0.000182508	1.46156	0.00437474	0.115191	3.58776	1.84308
7780			level4	Tectorigenin 4'-sulfate	14.2598717941549	381.339	297	POS										1.12933e-05	1.33397e-05	1.97379e-05	1.47903e-05	4.49498e-05	3.09455e-05	4.43922e-05	4.00958e-05	1.45102	0.00844894	0.141351	2.71095	1.4388
7787			level4			523.244	297	POS										3.65634e-06	2.1128e-06	3.24853e-06	3.00589e-06	4.29456e-06	6.91662e-06	7.3456e-06	6.18559e-06	1.30467	0.0399001	0.235685	2.05783	1.04112
7800			level4			614.482	296.9	POS										4.2797e-05	5.86779e-05	6.28947e-05	5.47899e-05	0.000165324	9.49155e-05	0.000140586	0.000133608	1.41981	0.0215024	0.191549	2.43856	1.28603
7805			level4			456.296	296.9	POS										8.55797e-06	9.27237e-06	1.23203e-05	1.00502e-05	2.0938e-05	1.59643e-05	2.02592e-05	1.90538e-05	1.43859	0.00968992	0.147618	1.89587	0.922857
7823			level4			502.353	296.8	POS										4.41952e-06	3.9895e-06	7.25165e-06	5.22022e-06	3.06868e-05	3.60437e-05	2.23187e-05	2.96831e-05	1.50773	0.00404399	0.113489	5.68617	2.50746
7830			level4			615.485	296.8	POS										1.47514e-05	1.94944e-05	2.16209e-05	1.86222e-05	5.7294e-05	3.10891e-05	4.93734e-05	4.59188e-05	1.40523	0.0271946	0.207442	2.46581	1.30206
7836			level4			1102.49	296.8	POS										2.56279e-06	1.08402e-05	9.09998e-06	7.501e-06	2.30563e-05	1.67729e-05	1.85823e-05	1.94705e-05	1.19726	0.0188351	0.182162	2.59572	1.37614
7852			level4			495.257	296.6	POS										1.32983e-06	2.09979e-05	1.15736e-06	7.82836e-06	2.26633e-05	3.16293e-05	3.23858e-05	2.88928e-05	1.16138	0.0445451	0.237455	3.69078	1.88393
7879			level4	GDP-4-amino-4,6-dideoxy-alpha-D-mannose	-18.8263248332395	589.353	296.4	POS										2.07536e-06	1.45554e-06	1.19886e-06	1.57659e-06	4.67354e-06	4.53493e-06	4.59911e-06	4.60253e-06	1.49136	0.00631772	0.129633	2.9193	1.54562
7888			level4			381.262	296.3	POS										8.85787e-06	1.17835e-05	2.15055e-05	1.40489e-05	3.63733e-05	2.52092e-05	3.33483e-05	3.16436e-05	1.31618	0.025609	0.203207	2.25238	1.17145
7892			level4	dTDP-2,3,6-trideoxy-3-C-methyl-4-O-methyl-3-nitroso-beta-L-arabino-hexopyranose	13.4699007869825	574.397	296.3	POS										2.49585e-06	1.17379e-06	2.84314e-06	2.17093e-06	7.90231e-06	1.06542e-05	1.26377e-05	1.03981e-05	1.46215	0.00493097	0.120306	4.7897	2.25994
7900			level4	Adenosine 5-O-(3-thiotriphophate)	-12.7599491327376	524.247	296.2	POS										7.96202e-07	1.89445e-06	1.07471e-06	1.25512e-06	1.02185e-05	8.64498e-06	1.35349e-05	1.07995e-05	1.50504	0.0029639	0.104709	8.60433	3.10506
7902			level4			531.272	296.2	POS										8.27751e-06	6.13221e-06	8.30094e-06	7.57022e-06	4.38789e-06	4.39321e-06	4.08532e-06	4.28881e-06	1.45391	0.0424134	0.237455	0.566537	-0.819758
7908			level4			527.353	296.1	POS										1.08732e-05	1.50634e-05	1.80907e-05	1.46758e-05	5.3266e-05	2.60643e-05	3.65309e-05	3.86204e-05	1.37875	0.0431382	0.237455	2.63157	1.39593
7909			level4			658.509	296.1	POS										3.25213e-05	4.28503e-05	4.62083e-05	4.05266e-05	0.000121232	6.61775e-05	8.27763e-05	9.00619e-05	1.38104	0.0421563	0.237455	2.22229	1.15205
7912			level4	CDP-4-dehydro-6-deoxy-D-glucose	-18.7768464813534	548.299	296	POS										1.20437e-05	7.65244e-06	8.30591e-06	9.33401e-06	3.26387e-06	3.1496e-06	3.69867e-06	3.37071e-06	1.491	0.0469274	0.237455	0.361122	-1.46944
7936			level4			537.417	295.7	POS										1.09969e-06	3.90952e-06	2.01959e-06	2.34293e-06	9.12447e-06	5.08324e-06	9.19254e-06	7.80008e-06	1.30946	0.0265104	0.205761	3.3292	1.73517
7938			level4			686.444	295.7	POS										4.99786e-06	5.0708e-06	7.6213e-06	5.89666e-06	1.07085e-06	1.95801e-07	9.37875e-07	7.34843e-07	1.38865	0.00466189	0.117874	0.12462	-3.00439
7940			level4			754.3	295.7	POS										2.92986e-05	1.25958e-06	1.56976e-06	1.07093e-05	5.05791e-05	3.24661e-05	4.89651e-05	4.40034e-05	1.18838	0.0383766	0.233572	4.10889	2.03875
7943			level4			407.335	295.6	POS										3.83594e-06	6.97312e-06	6.09939e-06	5.63615e-06	2.33383e-05	1.6407e-05	2.36153e-05	2.11202e-05	1.48262	0.00364401	0.111562	3.74728	1.90584
7945			level4	3,5-Di-O-galloyl-1,4-galactarolactone	4.47966280632967	497.341	295.6	POS										0.000172837	9.60675e-05	0.000146832	0.000138579	0.000331443	0.000240024	0.000262559	0.000278009	1.36911	0.0172285	0.176812	2.00614	1.00442
7949			level4			536.414	295.6	POS										3.41998e-06	1.4027e-05	8.86867e-06	8.77187e-06	3.38448e-05	2.0886e-05	3.30676e-05	2.92661e-05	1.29556	0.0168857	0.175948	3.33636	1.73828
7957			level4			424.362	295.5	POS										4.92066e-05	9.18128e-05	8.83796e-05	7.64663e-05	0.000294037	0.000194244	0.000279894	0.000256058	1.45296	0.00618683	0.128975	3.34864	1.74358
7958			level4			426.368	295.5	POS										9.32938e-07	2.70563e-06	2.47368e-06	2.03742e-06	8.4051e-06	6.31591e-06	8.26591e-06	7.66231e-06	1.39483	0.00300115	0.105264	3.7608	1.91104
7962			level4			644.277	295.5	POS										4.43639e-07	4.60122e-07	5.34828e-07	4.7953e-07	1.83034e-07	6.19632e-09	6.61583e-09	6.52819e-08	1.27093	0.00314805	0.106633	0.136137	-2.87686
7967			level4	BL V	1.70469675289872	425.365	295.4	POS										1.16392e-05	2.13368e-05	2.09143e-05	1.79635e-05	6.66442e-05	4.56437e-05	6.42705e-05	5.88528e-05	1.45623	0.00512663	0.122133	3.27625	1.71205
7972			level4			498.344	295.4	POS										3.12242e-05	1.69248e-05	2.57451e-05	2.46313e-05	5.98497e-05	4.27607e-05	4.93555e-05	5.06553e-05	1.37204	0.015991	0.173767	2.05654	1.04022
7974			level4			572.462	295.4	POS										5.94999e-06	3.96426e-06	5.38998e-06	5.10141e-06	1.06352e-05	1.68124e-05	1.32812e-05	1.35763e-05	1.46135	0.0108447	0.1529	2.66128	1.41212
7979			level4	Dopachrome o-semiquinone	11.4511384956911	195.174	295.3	POS										2.80587e-07	4.08152e-06	1.63735e-06	1.99982e-06	1.32472e-05	6.52853e-06	1.20017e-05	1.05925e-05	1.2285	0.0214741	0.191472	5.29671	2.4051
7980			level4	4-Hydroxyvalerylcarnitine	-6.25024777408262	253.252	295.3	POS										4.9432e-06	1.27109e-05	8.88528e-06	8.84647e-06	2.42505e-05	2.24938e-05	1.97604e-05	2.21682e-05	1.34735	0.00682325	0.133521	2.50588	1.32532
7981			level4	Spirolaurenone	22.1335922056457	300.26	295.3	POS										5.77922e-06	1.52897e-05	9.46095e-06	1.01766e-05	2.41532e-05	2.51785e-05	2.27879e-05	2.40399e-05	1.3263	0.00829381	0.140969	2.36226	1.24017
7986			level4			432.277	295.2	POS										9.24509e-06	1.0263e-05	1.07479e-05	1.00853e-05	1.28819e-05	1.14845e-05	1.19196e-05	1.20954e-05	1.3343	0.0293767	0.212686	1.1993	0.262197
7989			level4	2-(4-Hydroxybenzyl)isoindole-1,3-dione	-20.0455908269635	254.255	295.1	POS										4.61408e-07	2.34031e-06	1.02216e-06	1.27463e-06	3.51463e-06	3.84272e-06	3.464e-06	3.60712e-06	1.23612	0.0148966	0.169426	2.82994	1.50077
8005			level4	Glutamic acid-betaxanthin	24.7537380100669	341.304	294.9	POS										1.7905e-05	4.80671e-05	4.15032e-05	3.58251e-05	8.42168e-05	8.91375e-05	7.4744e-05	8.26994e-05	1.28495	0.00967729	0.147618	2.30842	1.20691
8006			level4			88.4833	294.9	POS										1.31711e-07	7.11176e-07	4.44143e-07	4.2901e-07	4.35075e-06	1.81218e-06	2.44906e-06	2.87066e-06	1.3632	0.0352707	0.226652	6.69137	2.7423
8007			level4	Maculosine	7.61620185914751	332.33	294.9	POS										3.52782e-06	3.04309e-06	5.21113e-06	3.92735e-06	0.00033624	0.000328481	0.000165847	0.000276856	1.54397	0.0390001	0.234406	70.4945	6.13944
8016			level4			911.389	294.9	POS										1.05575e-05	7.08771e-06	8.63999e-06	8.76174e-06	3.49443e-06	4.09686e-06	3.38094e-06	3.65741e-06	1.49056	0.00767156	0.137308	0.417429	-1.2604
8019			level4	TG(20:3(5Z,8Z,11Z)/22:5(4Z,7Z,10Z,13Z,16Z)/O-18:0)	-12.9835270825403	946.547	294.9	POS										5.44078e-09	5.69788e-09	6.14832e-09	5.76233e-09	6.85906e-09	6.19632e-09	6.61583e-09	6.55707e-09	1.27832	0.048516	0.237455	1.13792	0.1864
8028			level4			797.35	294.7	POS										1.57931e-05	3.01662e-05	5.98539e-05	3.5271e-05	0.000128605	6.79016e-05	0.000121498	0.000106001	1.27359	0.0377767	0.232291	3.00534	1.58753
8029			level4			1074.49	294.7	POS										9.66112e-06	3.15863e-06	6.72975e-06	6.5165e-06	2.65932e-07	1.06915e-06	1.92589e-06	1.08699e-06	1.28272	0.0488941	0.238185	0.166806	-2.58375
8040			level4			503.383	294.5	POS										1.76565e-06	3.49601e-06	1.8714e-06	2.37768e-06	1.01119e-05	1.02468e-05	6.95651e-06	9.10506e-06	1.4536	0.00515614	0.122188	3.82938	1.93711
8049			level4			81.265	294.4	POS										5.44078e-09	5.69788e-09	6.14832e-09	5.76233e-09	6.85906e-09	6.19632e-09	6.61583e-09	6.55707e-09	1.27832	0.048516	0.237455	1.13792	0.1864
8050			level4	Undecane	3.34851060366996	157.316	294.4	POS										5.44078e-09	5.69788e-09	6.14832e-09	5.76233e-09	6.85906e-09	6.19632e-09	6.61583e-09	6.55707e-09	1.27832	0.048516	0.237455	1.13792	0.1864
8051			level4			157.567	294.4	POS										5.44078e-09	5.69788e-09	6.14832e-09	5.76233e-09	6.85906e-09	6.19632e-09	6.61583e-09	6.55707e-09	1.27832	0.048516	0.237455	1.13792	0.1864
8055			level4			629.347	294.4	POS										7.32979e-07	8.11857e-07	0.000114422	3.86556e-05	0.000182495	0.000144053	0.000148764	0.000158437	1.16468	0.0394789	0.235139	4.09869	2.03516
8057			level4			630.329	294.4	POS										2.94103e-06	1.52173e-06	7.16954e-05	2.53861e-05	0.000110993	8.22365e-05	0.000101675	9.83016e-05	1.17503	0.0416801	0.237455	3.87227	1.95318
8059			level4			631.191	294.4	POS										5.44078e-09	5.69788e-09	6.14832e-09	5.76233e-09	6.85906e-09	6.19632e-09	6.61583e-09	6.55707e-09	1.27832	0.048516	0.237455	1.13792	0.1864
8070			level4	Nicotinate adenine dinucleotide phosphate	-2.65532138985175	745.397	294.4	POS										5.44078e-09	5.69788e-09	6.14832e-09	5.76233e-09	6.85906e-09	6.19632e-09	6.61583e-09	6.55707e-09	1.27832	0.048516	0.237455	1.13792	0.1864
8073			level4	TG(20:3(5Z,8Z,11Z)/22:6(4Z,7Z,10Z,13Z,16Z,19Z)/O-18:0)	-9.61977073460249	944.534	294.4	POS										5.44078e-09	5.69788e-09	6.14832e-09	5.76233e-09	6.85906e-09	6.19632e-09	6.61583e-09	6.55707e-09	1.27832	0.048516	0.237455	1.13792	0.1864
8074			level4			945.538	294.4	POS										5.44078e-09	5.69788e-09	6.14832e-09	5.76233e-09	6.85906e-09	6.19632e-09	6.61583e-09	6.55707e-09	1.27832	0.048516	0.237455	1.13792	0.1864
8077			level4			79.5962	294.3	POS										5.44078e-09	5.69788e-09	6.14832e-09	5.76233e-09	6.85906e-09	6.19632e-09	6.61583e-09	6.55707e-09	1.27832	0.048516	0.237455	1.13792	0.1864
8078			level4			157.439	294.3	POS										5.44078e-09	5.69788e-09	6.14832e-09	5.76233e-09	6.85906e-09	6.19632e-09	6.61583e-09	6.55707e-09	1.27832	0.048516	0.237455	1.13792	0.1864
8079			level4	FK-614	-14.0408633831139	469.391	294.3	POS										1.57842e-05	2.54979e-05	2.60884e-05	2.24568e-05	7.05474e-05	4.95803e-05	7.03106e-05	6.34795e-05	1.45786	0.00600579	0.127689	2.82673	1.49914
8080			level4	Kalbreclasine	-17.8454827383943	470.395	294.3	POS										2.01241e-06	2.79278e-06	2.7429e-06	2.51603e-06	1.01745e-05	5.89879e-06	6.42514e-06	7.49947e-06	1.46122	0.0219884	0.193087	2.98068	1.57564
8081			level4			504.386	294.3	POS										1.7251e-07	1.69868e-07	6.14832e-09	1.16175e-07	4.40879e-07	6.96508e-07	9.01055e-07	6.79481e-07	1.12917	0.0173812	0.1772	5.84874	2.54813
8085			level4			629.132	294.3	POS										5.44078e-09	5.69788e-09	6.14832e-09	5.76233e-09	6.85906e-09	6.19632e-09	6.61583e-09	6.55707e-09	1.27832	0.048516	0.237455	1.13792	0.1864
8088			level4			652.244	294.3	POS										3.55769e-06	1.62568e-06	3.06023e-06	2.74787e-06	9.97746e-07	4.65414e-07	8.73247e-07	7.78802e-07	1.36199	0.030619	0.216412	0.283421	-1.81898
8090			level4	Avridine	7.07938339788962	668.217	294.3	POS										5.44078e-09	5.69788e-09	6.14832e-09	5.76233e-09	6.85906e-09	6.19632e-09	6.61583e-09	6.55707e-09	1.27832	0.048516	0.237455	1.13792	0.1864
8092			level4			700.338	294.3	POS										5.44078e-09	5.69788e-09	6.14832e-09	5.76233e-09	6.85906e-09	6.19632e-09	6.61583e-09	6.55707e-09	1.27832	0.048516	0.237455	1.13792	0.1864
8095			level4			747.564	294.3	POS										5.28781e-06	7.0756e-06	7.76659e-06	6.71e-06	1.18813e-05	1.01095e-05	1.59557e-05	1.26488e-05	1.36452	0.0343142	0.224688	1.88507	0.91462
8097			level4	TG(20:3(5Z,8Z,11Z)/22:5(4Z,7Z,10Z,13Z,16Z)/O-18:0)	-21.8672267627815	946.539	294.3	POS										5.44078e-09	5.69788e-09	6.14832e-09	5.76233e-09	6.85906e-09	6.19632e-09	6.61583e-09	6.55707e-09	1.27832	0.048516	0.237455	1.13792	0.1864
8100			level4	C.I. Acid red 33	-7.43842322372835	468.388	294.2	POS										6.07663e-05	9.7235e-05	0.000101012	8.63379e-05	0.000288429	0.000197325	0.000272707	0.00025282	1.46339	0.00574292	0.125894	2.92827	1.55005
8101			level4			501.377	294.2	POS										1.84485e-05	5.55594e-05	3.25885e-05	3.55322e-05	0.000160937	0.000105955	0.000127649	0.000131513	1.39576	0.00763795	0.137229	3.70125	1.88801
8102			level4			502.38	294.2	POS										6.94633e-06	1.71956e-05	1.13626e-05	1.18348e-05	5.4211e-05	4.49972e-05	4.33651e-05	4.75244e-05	1.45529	0.00136299	0.0840842	4.01564	2.00563
8104			level4			321.15	294.1	POS										1.56201e-05	2.40086e-05	1.64116e-05	1.86801e-05	2.73591e-05	2.75073e-05	3.54926e-05	3.01197e-05	1.29508	0.0392477	0.234875	1.61239	0.689205
8109			level4			648.422	294.1	POS										8.3346e-07	6.49657e-07	5.1254e-07	6.65219e-07	2.56693e-06	1.39284e-06	1.55471e-06	1.83816e-06	1.40848	0.0363886	0.229449	2.76324	1.46636
8124			level4	1-(5-Phospho-D-ribosyl)-ATP	12.6841523173457	720.292	293.9	POS										1.42474e-06	1.24845e-06	1.17104e-06	1.28141e-06	2.08691e-07	4.78571e-07	3.34605e-07	3.40622e-07	1.46997	0.000964334	0.078246	0.265818	-1.91149
8125			level4			404.255	293.8	POS										7.28803e-07	1.7341e-06	2.10681e-06	1.52324e-06	7.56464e-06	3.53861e-06	5.67083e-06	5.59136e-06	1.34997	0.0299935	0.214553	3.67071	1.87606
8141			level4	1-Methylpyrrolinium	22.8596285220689	85.1488	293.6	POS										1.63079e-05	2.1185e-05	2.10084e-05	1.95004e-05	2.57003e-05	2.91391e-05	3.02068e-05	2.83487e-05	1.37988	0.0134927	0.164036	1.45375	0.539779
8143			level4			393.298	293.6	POS										1.39648e-05	1.20889e-05	1.96359e-05	1.52299e-05	3.11198e-06	2.18214e-06	3.23029e-06	2.84147e-06	1.51135	0.0297298	0.213786	0.186572	-2.4222
8149			level4			601.472	293.6	POS										1.65269e-05	2.48752e-05	2.42797e-05	2.18939e-05	7.14381e-05	3.94732e-05	8.18016e-05	6.42376e-05	1.40053	0.0313047	0.218106	2.93404	1.55289
8159			level4	Diflufenican	-13.8896039487414	395.297	293.4	POS										1.2717e-06	2.15902e-06	1.53383e-06	1.65485e-06	4.6741e-06	2.42757e-06	4.68287e-06	3.92818e-06	1.31704	0.045973	0.237455	2.37374	1.24716
8165			level4	Adenylyl sulfate	-24.0509599695131	428.281	293.3	POS										1.23668e-06	1.18261e-06	2.29362e-06	1.57097e-06	4.12334e-06	2.96827e-06	4.71197e-06	3.93453e-06	1.38561	0.0196073	0.185255	2.50452	1.32454
8172			level4			755.339	293.3	POS										3.17153e-05	3.9604e-05	3.18632e-05	3.43941e-05	2.54027e-05	2.18808e-05	2.57649e-05	2.43495e-05	1.38167	0.0253067	0.20224	0.707954	-0.498272
8177			level4	4-(3'-Di(2-chloroethyl)aminopropionyl)biphenyl	-24.7704693388179	351.279	293.2	POS										1.97228e-06	2.66438e-06	1.20909e-06	1.94858e-06	6.31532e-06	8.60843e-06	1.37274e-05	9.55038e-06	1.43697	0.0270875	0.207263	4.9012	2.29313
8179			level4			468.344	293.2	POS										9.54351e-07	3.00493e-06	2.59353e-06	2.18427e-06	8.45655e-06	7.42391e-06	4.85418e-06	6.91155e-06	1.30739	0.0189373	0.182493	3.16424	1.66186
8198			level4	TG(16:0/16:1(9Z)/20:4(5Z,8Z,11Z,14Z))	14.5580975126791	854.387	293.1	POS										2.70745e-05	2.17193e-05	1.6844e-05	2.18793e-05	2.22869e-06	2.50162e-06	3.69716e-06	2.80916e-06	1.52748	0.0211369	0.190424	0.128394	-2.96135
8201			level4	Luteolin	-13.5433556121719	287.24	293	POS										4.64287e-07	5.4102e-07	4.24821e-07	4.76709e-07	7.8977e-07	8.73838e-07	1.2293e-06	9.64303e-07	1.42403	0.0246947	0.200423	2.02283	1.01638
8202			level4	Aucubin	-11.1933769488283	347.333	293	POS										1.39442e-06	2.6334e-06	2.19106e-06	2.07296e-06	6.4736e-06	6.64603e-06	7.25626e-06	6.79196e-06	1.48354	0.000403662	0.0590728	3.27646	1.71214
8203			level4			350.267	293	POS										1.39218e-05	2.79812e-05	1.75351e-05	1.98127e-05	5.77235e-05	7.58392e-05	8.68127e-05	7.34585e-05	1.46242	0.00479015	0.119205	3.70765	1.8905
8206			level4	T 0901317	11.682979361241	482.346	293	POS										6.69693e-06	5.35591e-06	6.66533e-06	6.23939e-06	1.51257e-05	9.61505e-06	1.00672e-05	1.16027e-05	1.38003	0.0421553	0.237455	1.85958	0.894977
8207			level4			512.199	293	POS										9.96375e-06	1.56654e-05	1.64157e-05	1.40149e-05	5.7163e-06	5.25395e-06	2.84453e-06	4.60493e-06	1.40638	0.0133413	0.163503	0.328573	-1.60571
8208			level4			512.414	293	POS										6.57718e-05	9.87616e-05	0.00010061	8.83811e-05	0.000282652	0.000173728	0.000268774	0.000241718	1.44324	0.013125	0.162697	2.73495	1.45151
8209			level4			514.42	293	POS										2.47874e-06	4.20029e-06	3.7492e-06	3.47608e-06	1.44228e-05	7.14029e-06	1.2621e-05	1.13947e-05	1.41869	0.0244536	0.199733	3.27803	1.71283
8210			level4			519.455	293	POS										1.17191e-07	5.79176e-07	5.31699e-07	4.09356e-07	4.49273e-06	2.35993e-06	2.12575e-06	2.9928e-06	1.37592	0.0281081	0.210019	7.31101	2.87007
8218			level4	3',5'-Cyclic diGMP	7.27595907773058	691.423	293	POS										1.84384e-06	2.18197e-06	3.87375e-06	2.63319e-06	7.72958e-06	6.09819e-06	5.79586e-06	6.54121e-06	1.39773	0.0108411	0.1529	2.48414	1.31275
8225			level4			513.417	292.9	POS										1.69482e-05	2.7318e-05	2.69633e-05	2.37432e-05	7.65421e-05	4.87002e-05	7.33763e-05	6.62062e-05	1.44256	0.0108145	0.152821	2.78843	1.47945
8238			level4			422.288	292.8	POS										6.73224e-07	7.18058e-07	3.64567e-07	5.85283e-07	1.8418e-06	1.44461e-06	1.23422e-06	1.50687e-06	1.38119	0.0117861	0.157842	2.57461	1.36435
8251			level4			413.216	292.6	POS										5.44078e-09	5.69788e-09	6.14832e-09	5.76233e-09	6.85906e-09	6.19632e-09	6.61583e-09	6.55707e-09	1.27832	0.048516	0.237455	1.13792	0.1864
8254			level4			544.254	292.6	POS										1.00266e-06	6.10882e-07	2.96776e-07	6.36771e-07	4.41308e-06	4.39843e-06	3.05105e-06	3.95419e-06	1.44483	0.00259105	0.101428	6.20975	2.63453
8261			level4			456.28	292.5	POS										5.15634e-07	9.67431e-07	4.91478e-07	6.58181e-07	1.75045e-06	1.14073e-06	1.33495e-06	1.40871e-06	1.30848	0.0340795	0.224336	2.14031	1.09782
8262			level4			517.389	292.5	POS										9.97319e-07	1.53876e-06	1.31224e-06	1.28277e-06	2.72164e-06	2.03696e-06	3.36278e-06	2.70713e-06	1.38449	0.0262312	0.205	2.11037	1.0775
8263			level4			559.448	292.5	POS										1.21582e-07	4.93002e-07	1.42666e-07	2.52417e-07	1.27661e-06	9.80019e-07	1.74672e-06	1.33445e-06	1.37983	0.0129897	0.162125	5.28669	2.40237
8267			level4			705.261	292.5	POS										5.44078e-09	5.69788e-09	6.14832e-09	5.76233e-09	6.85906e-09	6.19632e-09	6.61583e-09	6.55707e-09	1.27832	0.048516	0.237455	1.13792	0.1864
8280			level4			646.256	292.4	POS										1.30106e-07	1.37009e-07	2.44846e-07	1.70654e-07	6.85906e-09	6.19632e-09	6.61583e-09	6.55707e-09	1.54139	0.047617	0.237455	0.0384232	-4.70188
8281			level4			647.257	292.4	POS										5.44078e-09	5.69788e-09	6.14832e-09	5.76233e-09	6.85906e-09	6.19632e-09	6.61583e-09	6.55707e-09	1.27832	0.048516	0.237455	1.13792	0.1864
8295			level4			968.7	292.4	POS										1.41065e-07	1.15768e-06	1.15334e-06	8.17361e-07	5.86776e-06	2.50703e-06	5.47497e-06	4.61659e-06	1.25256	0.0269743	0.206963	5.64816	2.49778
8296			level4			74.713	292.3	POS										5.44078e-09	5.69788e-09	6.14832e-09	5.76233e-09	6.85906e-09	6.19632e-09	6.61583e-09	6.55707e-09	1.27832	0.048516	0.237455	1.13792	0.1864
8300			level4	m-Carboxyphenyl phenylacetamidomethylphosphote	-17.6840547751713	350.276	292.3	POS										1.29654e-05	2.54464e-05	1.61799e-05	1.81972e-05	5.78303e-05	8.09955e-05	8.81494e-05	7.56584e-05	1.47539	0.00435992	0.115191	4.15769	2.05578
8304			level4	5'-Guanylylmethylenebisphosphote	0.620482126642533	522.215	292.3	POS										4.32258e-07	1.20953e-05	2.0324e-07	4.24359e-06	6.74093e-05	6.84224e-05	8.66255e-05	7.41524e-05	1.33052	0.000691213	0.0703616	17.474	4.12714
8311			level4			829.376	292.3	POS										5.67754e-07	3.96238e-06	2.47411e-06	2.33475e-06	5.04828e-06	4.89295e-06	6.48971e-06	5.47698e-06	1.0678	0.0468344	0.237455	2.34586	1.23011
8317			level4			74.8244	292.1	POS										5.44078e-09	5.69788e-09	6.14832e-09	5.76233e-09	6.85906e-09	6.19632e-09	6.61583e-09	6.55707e-09	1.27832	0.048516	0.237455	1.13792	0.1864
8320			level4			325.218	292.1	POS										9.35361e-07	1.16612e-06	9.22681e-07	1.00805e-06	3.90438e-06	2.96655e-06	3.193e-06	3.35464e-06	1.52911	0.00132526	0.083494	3.32784	1.73459
8326			level4	2-Methylthio-adenosine-5'-diphosphate	-15.1632191680294	474.29	292	POS										5.24348e-07	3.51792e-06	1.0211e-06	1.68779e-06	6.54756e-06	8.35219e-06	1.40516e-05	9.65045e-06	1.3286	0.0311278	0.217731	5.7178	2.51546
8327			level4			494.347	292	POS										2.2668e-06	1.20261e-05	1.51057e-06	5.26783e-06	1.91182e-05	2.23789e-05	2.9191e-05	2.35627e-05	1.27555	0.0153066	0.171183	4.47294	2.16122
8330			level4			654.298	292	POS										1.76364e-06	5.38557e-06	2.87393e-06	3.34105e-06	1.14339e-05	6.54338e-06	8.1e-06	8.69242e-06	1.27147	0.0408098	0.237455	2.6017	1.37946
8363			level4			448.838	291.7	POS										2.35153e-06	2.20624e-06	1.99334e-06	2.1837e-06	3.62272e-06	2.95388e-06	3.7719e-06	3.4495e-06	1.44984	0.00965739	0.147552	1.57966	0.65961
8364			level4	3,4-Bis(7-chloroindol-3-yl)pyrrole-2,5-dicarboxylate	18.1027569314466	455.278	291.7	POS										1.40918e-06	4.37142e-06	3.10205e-06	2.96088e-06	7.78413e-06	5.14208e-06	6.84614e-06	6.59078e-06	1.2127	0.0347626	0.225748	2.22595	1.15442
8370			level4	N-Adenylyl-L-phenylalanine	8.54256039350059	495.407	291.7	POS										2.9481e-07	3.9043e-07	6.33219e-07	4.39486e-07	1.56065e-06	9.46573e-07	1.09102e-06	1.19941e-06	1.39025	0.0227147	0.195198	2.72913	1.44844
8372			level4			517.387	291.7	POS										1.13122e-06	1.79012e-06	1.23062e-06	1.38399e-06	3.47911e-06	2.31963e-06	3.52029e-06	3.10634e-06	1.39988	0.0178228	0.17869	2.24449	1.16639
8373			level4			523.217	291.7	POS										4.89883e-06	1.66112e-06	3.65884e-06	3.40626e-06	1.42911e-05	1.33061e-05	1.90046e-05	1.55339e-05	1.44011	0.00370347	0.111732	4.56041	2.18916
8377			level4			556.44	291.7	POS										5.79879e-05	8.91036e-05	8.65244e-05	7.7872e-05	0.000245577	0.000148048	0.000262904	0.000218843	1.42665	0.0191297	0.183771	2.81029	1.49072
8378			level4			557.443	291.7	POS										1.73068e-05	2.72485e-05	2.62181e-05	2.35912e-05	7.73531e-05	4.61283e-05	8.10293e-05	6.81702e-05	1.42935	0.0179621	0.179335	2.88965	1.5309
8379			level4			558.447	291.7	POS										3.15322e-06	4.30049e-06	4.49746e-06	3.98372e-06	1.32863e-05	7.7679e-06	1.34651e-05	1.15064e-05	1.44731	0.017168	0.176718	2.88836	1.53025
8381			level4			597.269	291.7	POS										4.56011e-05	2.00844e-05	3.66759e-05	3.41204e-05	2.74957e-06	1.22396e-05	1.64209e-05	1.047e-05	1.16386	0.0496955	0.240133	0.306854	-1.70437
8416			level4	CDP-DG(i-22:0/20:3(5Z,8Z,11Z)-O(14R,15S))	16.8044554478347	1103.32	291.7	POS										5.44078e-09	5.69788e-09	6.14832e-09	5.76233e-09	6.85906e-09	6.19632e-09	6.61583e-09	6.55707e-09	1.27832	0.048516	0.237455	1.13792	0.1864
8417			level4			1103.57	291.7	POS										5.44078e-09	5.69788e-09	6.14832e-09	5.76233e-09	6.85906e-09	6.19632e-09	6.61583e-09	6.55707e-09	1.27832	0.048516	0.237455	1.13792	0.1864
8418			level4	TG(24:0/22:5(4Z,7Z,10Z,13Z,16Z)/24:0)	-11.1017505834104	1106.82	291.7	POS										5.44078e-09	5.69788e-09	6.14832e-09	5.76233e-09	6.85906e-09	6.19632e-09	6.61583e-09	6.55707e-09	1.27832	0.048516	0.237455	1.13792	0.1864
8419			level4	(6Z,9Z,12Z,15Z,18Z,21Z)-Tetracosahexaenoyl-CoA	3.90882847865373	1107.07	291.7	POS										5.44078e-09	5.69788e-09	6.14832e-09	5.76233e-09	6.85906e-09	6.19632e-09	6.61583e-09	6.55707e-09	1.27832	0.048516	0.237455	1.13792	0.1864
8420			level4	CTAP-III	-14.079524192629	1107.32	291.7	POS										5.44078e-09	5.69788e-09	6.14832e-09	5.76233e-09	6.85906e-09	6.19632e-09	6.61583e-09	6.55707e-09	1.27832	0.048516	0.237455	1.13792	0.1864
8421			level4			1107.57	291.7	POS										5.44078e-09	5.69788e-09	6.14832e-09	5.76233e-09	6.85906e-09	6.19632e-09	6.61583e-09	6.55707e-09	1.27832	0.048516	0.237455	1.13792	0.1864
8442			level4			737.33	291.5	POS										1.15604e-05	1.34921e-05	1.02788e-05	1.17771e-05	3.13745e-06	4.18566e-06	4.16809e-06	3.8304e-06	1.52498	0.00133805	0.0836585	0.325242	-1.62042
8452			level4			577.221	291.3	POS										4.96817e-07	1.17876e-06	3.88018e-07	6.87865e-07	3.76836e-06	4.25819e-06	6.22785e-06	4.75147e-06	1.45651	0.00681312	0.133444	6.90756	2.78818
8455			level4			666.243	291.3	POS										2.58547e-05	1.07089e-05	2.1598e-05	1.93872e-05	5.92392e-06	8.42142e-06	4.00797e-07	4.91538e-06	1.07771	0.0468342	0.237455	0.253537	-1.97973
8457			level4	Fe-enterobactin	-9.28151462484503	720.344	291.3	POS										1.10768e-06	1.03515e-06	6.21093e-07	9.21307e-07	6.85906e-09	3.12402e-07	6.61583e-09	1.08626e-07	1.27691	0.0112466	0.15519	0.117904	-3.08432
8463			level4			637.377	291.2	POS										5.44078e-09	1.45812e-07	6.14832e-09	5.2467e-08	3.7507e-07	6.15851e-07	1.02492e-06	6.71948e-07	1.31295	0.0338155	0.223992	12.807	3.67887
8465			level4			671.305	291.2	POS										7.15133e-06	7.3708e-06	6.23686e-06	6.91966e-06	5.16692e-06	4.12043e-06	3.88336e-06	4.39024e-06	1.42937	0.00855934	0.142004	0.634458	-0.656402
8467			level4			74.7012	291.1	POS										5.44078e-09	5.69788e-09	6.14832e-09	5.76233e-09	6.85906e-09	6.19632e-09	6.61583e-09	6.55707e-09	1.27832	0.048516	0.237455	1.13792	0.1864
8474			level4	Xanthurenate-8-O-beta-D-glucoside	-1.29755041760146	368.314	291.1	POS										4.52509e-06	5.97707e-06	7.21426e-06	5.90547e-06	1.79337e-05	1.0259e-05	1.74262e-05	1.52063e-05	1.40902	0.0231383	0.196334	2.57495	1.36455
8481			level4			470.851	291.1	POS										2.57485e-06	2.54769e-06	3.01128e-06	2.71127e-06	3.78169e-06	3.05209e-06	3.96574e-06	3.59984e-06	1.29502	0.0485937	0.237607	1.32773	0.408963
8483			level4			528.388	291.1	POS										3.22389e-07	1.58813e-06	1.15758e-06	1.0227e-06	4.42487e-06	2.66329e-06	2.68254e-06	3.2569e-06	1.22789	0.0320443	0.220108	3.18461	1.67111
8492			level4			624.254	291.1	POS										1.1485e-05	1.03898e-05	1.22482e-05	1.13743e-05	2.16133e-05	1.87954e-05	1.75062e-05	1.9305e-05	1.49693	0.00394147	0.112629	1.69724	0.763191
8508			level4	Panfuran S	24.2924202561142	294.25	291	POS										5.32888e-06	1.35712e-05	1.41577e-05	1.10193e-05	3.90994e-05	2.25518e-05	4.04029e-05	3.4018e-05	1.32456	0.0230447	0.196259	3.08714	1.62627
8518			level4			431.293	291	POS										2.16795e-07	1.4542e-06	5.03141e-07	7.24713e-07	2.0307e-06	1.98924e-06	2.22193e-06	2.08062e-06	1.19587	0.0235711	0.197135	2.87096	1.52153
8519			level4			442.323	291	POS										1.246e-07	6.1908e-07	5.53241e-07	4.32307e-07	1.78191e-06	2.14816e-06	4.01724e-06	2.6491e-06	1.34625	0.0353497	0.226923	6.12783	2.61538
8520			level4			457.278	291	POS										6.96888e-07	8.93953e-07	1.14944e-06	9.13428e-07	2.24474e-06	2.83621e-06	2.07737e-06	2.38611e-06	1.46835	0.0051217	0.122103	2.61226	1.3853
8521			level4			470.349	291	POS										6.98525e-06	6.66303e-06	6.1682e-06	6.60549e-06	1.14111e-05	9.2368e-06	1.14743e-05	1.07074e-05	1.47887	0.00605927	0.127938	1.62098	0.69687
8522			level4			472.325	291	POS										3.01694e-06	4.73122e-06	2.38764e-06	3.3786e-06	8.02004e-06	6.84459e-06	8.61769e-06	7.82744e-06	1.39379	0.00699433	0.134784	2.31677	1.21211
8523			level4			492.341	291	POS										6.55775e-06	0.000127619	1.67018e-05	5.02929e-05	0.000208281	0.000247179	0.000350256	0.000268572	1.23946	0.0190848	0.183503	5.34016	2.41688
8524			level4			504.367	291	POS										1.54994e-07	2.12693e-07	6.14832e-09	1.24612e-07	5.40172e-07	5.34002e-07	6.16457e-07	5.63544e-07	1.08288	0.00280694	0.103611	4.5224	2.17709
8525			level4			518.299	291	POS										8.76565e-07	2.68696e-06	1.23163e-06	1.59839e-06	3.17829e-06	3.01684e-06	3.50456e-06	3.23323e-06	1.19518	0.0460472	0.237455	2.02281	1.01636
8529			level4			605.343	291	POS										1.58111e-06	7.50357e-06	2.9889e-06	4.02453e-06	1.22375e-05	1.20241e-05	7.71183e-06	1.06578e-05	1.19037	0.0457484	0.237455	2.64822	1.40502
8530			level4			606.258	291	POS										1.04981e-06	2.22758e-06	2.2523e-06	1.84323e-06	4.42305e-06	4.28681e-06	3.99467e-06	4.23484e-06	1.35135	0.00455427	0.117177	2.29751	1.20007
8536			level4			736.326	291	POS										2.29259e-05	4.27893e-05	3.1185e-05	3.23001e-05	1.28763e-05	1.12546e-05	1.63694e-05	1.35001e-05	1.39658	0.034291	0.224674	0.41796	-1.25856
8548			level4	Adenylyl sulfate	18.0755487445244	428.299	290.8	POS										2.53069e-06	2.62941e-06	4.23258e-06	3.1309e-06	6.16159e-06	6.18687e-06	5.47329e-06	5.94058e-06	1.39524	0.00937717	0.146347	1.89741	0.924029
8553			level4	TG(14:1(9Z)/22:6(4Z,7Z,10Z,13Z,16Z,19Z)/22:6(4Z,7Z,10Z,13Z,16Z,19Z))	-2.2537418560385	922.406	290.8	POS										5.44078e-09	5.69788e-09	6.14832e-09	5.76233e-09	6.85906e-09	6.19632e-09	6.61583e-09	6.55707e-09	1.27832	0.048516	0.237455	1.13792	0.1864
8554			level4			195.116	290.7	POS										5.31712e-06	6.06907e-06	5.99658e-06	5.79426e-06	7.3676e-06	6.63091e-06	7.74502e-06	7.24785e-06	1.36544	0.0230586	0.196259	1.25087	0.322929
8555			level4			294.213	290.7	POS										1.72531e-05	4.19419e-05	1.66587e-05	2.52846e-05	7.80994e-05	5.19429e-05	9.05673e-05	7.35365e-05	1.32595	0.0267515	0.206259	2.90836	1.5402
8558			level4			508.347	290.7	POS										1.71323e-05	4.60337e-05	1.0873e-05	2.46797e-05	7.50804e-05	4.89189e-05	8.16696e-05	6.85563e-05	1.22467	0.0408778	0.237455	2.77784	1.47397
8560			level4			622.377	290.7	POS										6.42045e-06	2.69145e-06	4.8087e-06	4.6402e-06	6.85906e-09	4.24824e-07	1.38412e-06	6.05268e-07	1.10969	0.024987	0.201246	0.13044	-2.93854
8568			level4			638.267	290.6	POS										7.10554e-05	0.000110288	8.31128e-05	8.81521e-05	0.000169393	0.000127416	0.000142573	0.000146461	1.33681	0.0259952	0.204318	1.66146	0.732449
8570			level4			759.467	290.6	POS										5.44078e-09	5.69788e-09	6.14832e-09	5.76233e-09	6.85906e-09	6.19632e-09	6.61583e-09	6.55707e-09	1.27832	0.048516	0.237455	1.13792	0.1864
8576			level4			601.468	290.5	POS										1.52223e-05	2.57596e-05	2.39317e-05	2.16379e-05	7.48524e-05	3.96982e-05	8.48525e-05	6.64677e-05	1.38519	0.0333596	0.222838	3.07182	1.6191
8582			level4			187.147	290.4	POS										1.32943e-06	1.44158e-06	1.86566e-06	1.54556e-06	3.86512e-06	2.7643e-06	3.65892e-06	3.42944e-06	1.47075	0.00738362	0.136863	2.2189	1.14985
8583			level4	Stipitatote	-0.368048932385629	209.132	290.4	POS										5.57864e-06	1.05274e-05	8.5843e-06	8.23012e-06	2.74441e-05	1.89619e-05	2.55515e-05	2.39858e-05	1.44572	0.00589493	0.12685	2.91439	1.5432
8584			level4			215.082	290.4	POS										8.73731e-07	5.92815e-07	8.78754e-07	7.81766e-07	1.6668e-06	1.73118e-06	1.17242e-06	1.52347e-06	1.37456	0.0207496	0.189274	1.94875	0.962549
8593			level4			347.272	290.4	POS										1.35624e-06	1.80935e-06	1.42557e-06	1.53039e-06	4.07291e-06	6.56438e-06	5.91456e-06	5.51729e-06	1.49936	0.00629513	0.129633	3.60515	1.85006
8604			level4	Thiamin diphosphate	0.0550181231387184	426.322	290.4	POS										3.63023e-06	2.90839e-06	4.92643e-06	3.82168e-06	6.01526e-06	9.91022e-06	8.4647e-06	8.13006e-06	1.36346	0.0282132	0.21018	2.12735	1.08906
8608			level4			517.237	290.4	POS										2.65842e-06	3.86481e-06	4.7973e-06	3.77351e-06	6.24018e-06	8.5258e-06	5.93648e-06	6.90082e-06	1.29521	0.0380177	0.232762	1.82875	0.870861
8612			level4	dTDP-D-desosamine	14.1641398460689	560.414	290.4	POS										8.90183e-07	1.34014e-06	2.40802e-06	1.54611e-06	3.76591e-06	3.96095e-06	3.6756e-06	3.80082e-06	1.34861	0.00790722	0.138551	2.4583	1.29766
8614			level4			600.466	290.4	POS										5.05572e-05	7.67485e-05	7.53488e-05	6.75515e-05	0.000217958	0.000126148	0.000250026	0.000198044	1.41279	0.0266199	0.206067	2.93175	1.55176
8616			level4			613.364	290.4	POS										5.44078e-09	5.69788e-09	6.14832e-09	5.76233e-09	1.67174e-07	1.5115e-07	2.43602e-07	1.87309e-07	1.55246	0.0238027	0.197881	32.5057	5.02262
8620			level4			637.263	290.4	POS										0.000200703	0.000310029	0.000239989	0.00025024	0.000485084	0.000364006	0.000398046	0.000415712	1.33849	0.0264391	0.205454	1.66125	0.732272
8634			level4	DMPP	0.0735393252542847	319.204	290.3	POS										2.03619e-06	3.53672e-06	1.23749e-06	2.27014e-06	6.21179e-06	6.50453e-06	5.24668e-06	5.98767e-06	1.32852	0.00861783	0.142275	2.63758	1.39922
8651			level4			645.449	290.3	POS										1.49173e-05	2.53601e-05	2.44857e-05	2.15877e-05	6.96291e-05	4.2568e-05	8.93139e-05	6.71703e-05	1.40036	0.0309071	0.217153	3.11151	1.63762
8664			level4	Pyrazolate	1.87429307124245	440.32	290.1	POS										1.05095e-05	1.2e-05	1.1905e-05	1.14715e-05	3.85115e-05	2.57851e-05	3.32419e-05	3.25128e-05	1.51619	0.0277199	0.208771	2.83422	1.50295
8669			level4			442.294	290	POS										1.20891e-07	8.08355e-07	5.33051e-07	4.87432e-07	2.3442e-06	3.48814e-06	5.9644e-06	3.93225e-06	1.35814	0.033878	0.224049	8.06727	3.01208
8671			level4			665.293	290	POS										9.74734e-06	7.17318e-06	3.90425e-06	6.94159e-06	1.55103e-05	1.24268e-05	1.27542e-05	1.35638e-05	1.23141	0.0275163	0.208452	1.95398	0.966418
8676			level4			738.34	289.9	POS										7.93116e-06	6.20328e-06	6.80068e-06	6.97837e-06	2.45635e-06	1.03186e-06	1.35897e-06	1.61573e-06	1.46612	0.00128453	0.0829141	0.231533	-2.11071
8680			level4			499.351	289.8	POS										7.19276e-06	3.75498e-06	3.08961e-06	4.67912e-06	2.19328e-05	1.38702e-05	3.17439e-05	2.25156e-05	1.42626	0.02853	0.210669	4.81194	2.26662
8683			level4			71.722	289.7	POS										4.15233e-07	8.20323e-07	6.87173e-07	6.4091e-07	2.47807e-06	1.52224e-06	3.35814e-06	2.45282e-06	1.41656	0.0289811	0.211866	3.82709	1.93625
8688			level4	Hypoxylone	1.57505289536552	333.314	289.7	POS										1.95659e-06	1.11522e-07	2.02373e-06	1.36395e-06	1.71231e-05	1.76633e-05	8.52493e-06	1.44371e-05	1.29491	0.0124415	0.160163	10.5848	3.40392
8698			level4			444.348	289.7	POS										2.77321e-07	9.98541e-07	1.8371e-07	4.86524e-07	1.72146e-06	1.34243e-06	2.47796e-06	1.84728e-06	1.27385	0.03203	0.220071	3.7969	1.92482
8710			level4			567.294	289.7	POS										2.75309e-06	1.67652e-06	2.51454e-06	2.31472e-06	8.86893e-07	1.80462e-07	2.42357e-07	4.36571e-07	1.36387	0.00909565	0.14494	0.188606	-2.40655
8714			level4			596.309	289.7	POS										3.9004e-05	3.14664e-05	3.3807e-05	3.47591e-05	1.76696e-05	1.68221e-05	1.89804e-05	1.7824e-05	1.51852	0.00185512	0.0924199	0.512787	-0.963568
8732			level4			768.351	289.7	POS										1.57435e-05	2.00084e-05	1.55449e-05	1.7099e-05	1.38907e-05	9.40032e-06	6.83036e-06	1.00405e-05	1.23421	0.0490423	0.238547	0.587197	-0.768084
8737			level4			974.384	289.7	POS										7.15744e-06	5.48958e-06	6.37112e-06	6.33938e-06	3.18127e-06	4.37454e-06	3.49231e-06	3.6827e-06	1.42323	0.0114299	0.156303	0.580925	-0.783576
8738			level4			71.6105	289.6	POS										1.37843e-06	2.4827e-06	2.21181e-06	2.02431e-06	7.89661e-06	4.07327e-06	9.78797e-06	7.25262e-06	1.38991	0.0379722	0.232664	3.58276	1.84107
8740			level4			351.252	289.6	POS										8.92731e-06	1.09722e-05	7.77419e-06	9.22458e-06	1.67425e-05	1.36123e-05	2.11547e-05	1.71698e-05	1.37585	0.0288513	0.21149	1.86131	0.89632
8746			level4			513.202	289.6	POS										5.0753e-06	4.98424e-06	4.91661e-06	4.99205e-06	7.58845e-07	1.71184e-06	5.43804e-07	1.00483e-06	1.45395	0.00725341	0.136574	0.201286	-2.31268
8747			level4			546.354	289.6	POS										2.79721e-06	4.11534e-06	3.41233e-06	3.44163e-06	9.28062e-06	6.71008e-06	7.22496e-06	7.73856e-06	1.46139	0.00790796	0.138551	2.24852	1.16897
8750			level4			644.493	289.6	POS										4.08596e-05	6.86332e-05	6.2325e-05	5.72726e-05	0.000187342	0.000108519	0.000235326	0.000177062	1.39398	0.0341865	0.224553	3.09157	1.62834
8751			level4	Coenzyme F420-1	15.8630558097237	645.496	289.6	POS										1.43422e-05	2.3944e-05	2.2899e-05	2.03951e-05	6.29609e-05	3.87727e-05	7.97279e-05	6.04872e-05	1.39726	0.0308635	0.217113	2.96577	1.56841
8752			level4			646.499	289.6	POS										2.89681e-06	4.44716e-06	5.05003e-06	4.13134e-06	1.51148e-05	8.01057e-06	1.7821e-05	1.36488e-05	1.39618	0.0336006	0.223375	3.30373	1.72409
8753			level4			658.479	289.6	POS										7.1163e-06	1.4717e-05	1.07138e-06	7.63488e-06	3.85114e-05	2.51784e-05	2.39954e-05	2.92284e-05	1.14467	0.0240501	0.198608	3.82827	1.93669
8767			level4			258.109	289.3	POS										4.73735e-06	5.14412e-06	4.50073e-06	4.79407e-06	9.26976e-07	2.38635e-06	2.72581e-06	2.01304e-06	1.27526	0.00883429	0.143456	0.419903	-1.25187
8778			level4			439.283	289.1	POS										1.77939e-06	9.93657e-07	2.18027e-06	1.65111e-06	4.59146e-06	3.2681e-06	3.85769e-06	3.90575e-06	1.36875	0.0121051	0.158923	2.36553	1.24217
8782			level4	3-(ADP)-2-phosphoglycerate	10.4552240925887	596.257	289.1	POS										3.026e-05	2.54442e-05	3.09953e-05	2.88999e-05	1.26835e-05	1.39797e-05	1.48273e-05	1.38302e-05	1.51991	0.00123352	0.0816975	0.478554	-1.06325
8788			level4			684.27	289.1	POS										8.81542e-06	8.27328e-06	5.2517e-06	7.4468e-06	1.65607e-06	7.43591e-07	1.17623e-06	1.19196e-06	1.48936	0.00536712	0.123354	0.160064	-2.64328
8791			level4			708.33	289.1	POS										1.51055e-06	7.79711e-07	1.38606e-06	1.22544e-06	6.85906e-09	6.19632e-09	6.61583e-09	6.55707e-09	1.55004	0.0326312	0.221282	0.00535079	-7.54603
8794			level4	L-Ascorbic acid-2-glucoside	-15.3033999705765	339.267	289	POS										5.74302e-06	1.71537e-05	8.58571e-06	1.04941e-05	3.79079e-05	3.07207e-05	4.26272e-05	3.70853e-05	1.3929	0.00548073	0.124467	3.5339	1.82126
8796			level4	N-debutylhalofantrine	13.3314727997622	445.33	289	POS										5.02353e-07	9.83702e-07	1.57486e-06	1.02031e-06	5.48613e-06	3.95471e-06	4.75222e-06	4.73102e-06	1.43934	0.00235141	0.0987643	4.63687	2.21315
8797			level4			508.345	289	POS										1.6756e-05	9.0545e-06	1.07729e-05	1.21945e-05	8.30034e-05	5.84263e-05	8.53635e-05	7.55977e-05	1.51757	0.00207272	0.0944685	6.19934	2.63211
8803			level4			720.392	289	POS										2.1663e-06	4.6986e-06	2.7772e-06	3.21403e-06	2.40318e-07	1.38653e-06	2.30225e-07	6.19026e-07	1.32046	0.0384564	0.233698	0.192601	-2.37631
8804			level4			734.304	289	POS										5.44078e-09	5.69788e-09	6.14832e-09	5.76233e-09	6.85906e-09	6.19632e-09	6.61583e-09	6.55707e-09	1.27832	0.048516	0.237455	1.13792	0.1864
8810			level4	3,4-Dihydro-3-hydroxy-4-S-glutathionyl bromobenzene	-23.2685474260632	481.327	288.9	POS										3.42454e-06	2.33314e-06	3.08858e-06	2.94875e-06	1.65271e-06	1.87924e-06	5.27837e-07	1.35326e-06	1.14537	0.0390901	0.234661	0.458927	-1.12366
8819			level4	Rangbatti	-15.873161454175	415.323	288.8	POS										3.1198e-06	6.69485e-06	6.22823e-06	5.34763e-06	1.99619e-05	1.0795e-05	2.7883e-05	1.95467e-05	1.35346	0.0485939	0.237607	3.6552	1.86995
8823			level4	Triglochinin	20.1049026470221	360.3	288.7	POS										8.405e-07	2.64355e-07	5.11634e-07	5.3883e-07	2.02489e-06	2.08427e-06	2.12258e-06	2.07725e-06	1.41964	0.000812788	0.0738442	3.85511	1.94677
8827			level4			633.27	288.7	POS										3.22873e-07	1.53662e-06	1.02292e-06	9.60804e-07	1.9126e-06	2.56079e-06	2.6232e-06	2.36553e-06	1.16012	0.028445	0.210575	2.46203	1.29985
8842			level4			358.294	288.4	POS										5.3235e-05	1.81907e-05	4.53578e-05	3.89278e-05	0.000114485	0.0001144	0.000116538	0.000115141	1.36465	0.0184955	0.181047	2.95781	1.56453
8845			level4			73.0325	288.4	POS										5.44078e-09	5.69788e-09	6.14832e-09	5.76233e-09	6.85906e-09	6.19632e-09	6.61583e-09	6.55707e-09	1.27832	0.048516	0.237455	1.13792	0.1864
8846			level4			233.226	288.4	POS										4.82295e-06	5.34414e-06	2.51012e-06	4.22574e-06	1.39978e-05	9.97602e-06	1.30579e-05	1.23439e-05	1.40564	0.00557357	0.124847	2.92112	1.54652
8850			level4	Cellobiote	-16.4015273410103	359.297	288.4	POS										1.16585e-05	3.81683e-06	8.71345e-06	8.06291e-06	2.48784e-05	2.48287e-05	2.37154e-05	2.44742e-05	1.37047	0.00210154	0.0947778	3.0354	1.60189
8855			level4			443.28	288.4	POS										4.90567e-07	1.16004e-06	5.55795e-07	7.35468e-07	1.18168e-06	1.82365e-06	1.73432e-06	1.57988e-06	1.24378	0.0448318	0.237455	2.14813	1.10308
8862			level4			583.289	288.4	POS										1.38456e-06	7.03284e-07	1.22307e-06	1.10364e-06	2.36926e-07	6.19632e-09	6.61583e-09	8.32461e-08	1.31493	0.00965968	0.147552	0.0754288	-3.72874
8864			level4			596.285	288.4	POS										1.75847e-05	1.48805e-05	1.59646e-05	1.61433e-05	8.24767e-06	8.32615e-06	8.56085e-06	8.37822e-06	1.5375	0.00930939	0.145923	0.518991	-0.946218
8882			level4	Stipitatate	-0.969636007664796	183.137	288.3	POS										1.46901e-06	2.67272e-06	2.83012e-06	2.32395e-06	6.24441e-06	5.30454e-06	7.72325e-06	6.42406e-06	1.42267	0.00764749	0.137229	2.76429	1.46691
8886			level4	Arteflene	-10.7180290934038	409.343	288.3	POS										4.21018e-06	2.933e-06	5.27489e-06	4.13936e-06	7.94004e-07	1.01045e-06	1.08987e-06	9.64773e-07	1.49659	0.0405706	0.236972	0.233073	-2.10115
8889			level4			542.241	288.3	POS										1.31613e-06	1.90262e-06	1.57957e-06	1.59944e-06	3.42471e-06	3.80687e-06	4.43519e-06	3.88892e-06	1.49272	0.0025314	0.100643	2.43143	1.2818
8893			level4			631.235	288.3	POS										5.44078e-09	5.69788e-09	6.14832e-09	5.76233e-09	6.85906e-09	6.19632e-09	6.61583e-09	6.55707e-09	1.27832	0.048516	0.237455	1.13792	0.1864
8897			level4			298.245	288.2	POS										7.2998e-05	0.000106499	3.11033e-05	7.02002e-05	0.000167878	0.000121263	0.000138333	0.000142491	1.13181	0.0482364	0.237455	2.02979	1.02133
8900			level4	Bortezomib	-13.4724141611221	385.239	288.2	POS										5.44078e-09	2.05846e-07	6.14832e-09	7.24782e-08	5.45863e-07	8.54008e-07	6.90721e-07	6.96864e-07	1.28187	0.00494662	0.120518	9.61481	3.26526
8903			level4			473.363	288.2	POS										2.66468e-06	5.68652e-06	5.78722e-06	4.71281e-06	8.8127e-06	1.55657e-05	1.23358e-05	1.22381e-05	1.32236	0.0268722	0.206557	2.59677	1.37672
8919			level4	dTDP-3-N,N-dimethylamino-2,3,6-trideoxy-4-keto-D-glucose	18.8800262369301	558.4	288.1	POS										6.63306e-06	1.21471e-05	9.79832e-06	9.52617e-06	2.33573e-05	1.72629e-05	2.34839e-05	2.1368e-05	1.39686	0.0103991	0.150878	2.24309	1.16548
8920			level4			624.24	288.1	POS										4.24635e-05	2.65742e-05	2.55203e-05	3.15193e-05	4.38265e-06	2.5712e-06	1.41058e-06	2.78814e-06	1.49531	0.0318711	0.219727	0.0884582	-3.49886
8921			level4			632.24	288.1	POS										5.44078e-09	5.69788e-09	6.14832e-09	5.76233e-09	6.85906e-09	6.19632e-09	6.61583e-09	6.55707e-09	1.27832	0.048516	0.237455	1.13792	0.1864
8924			level4			671.42	288.1	POS										5.44078e-09	5.69788e-09	6.14832e-09	5.76233e-09	6.85906e-09	6.19632e-09	6.61583e-09	6.55707e-09	1.27832	0.048516	0.237455	1.13792	0.1864
8930			level4			648.236	288	POS										5.44078e-09	5.69788e-09	6.14832e-09	5.76233e-09	6.85906e-09	6.19632e-09	6.61583e-09	6.55707e-09	1.27832	0.048516	0.237455	1.13792	0.1864
8936			level4	Iolopride	16.6318695454238	405.262	287.9	POS										2.13228e-06	1.0577e-06	1.65653e-06	1.6155e-06	5.61407e-06	4.58833e-06	3.6213e-06	4.6079e-06	1.42457	0.0102162	0.150281	2.8523	1.51213
8941			level4			758.466	287.9	POS										5.44078e-09	5.69788e-09	6.14832e-09	5.76233e-09	6.85906e-09	6.19632e-09	6.61583e-09	6.55707e-09	1.27832	0.048516	0.237455	1.13792	0.1864
8944			level4			74.8097	287.8	POS										5.44078e-09	5.69788e-09	6.14832e-09	5.76233e-09	6.85906e-09	6.19632e-09	6.61583e-09	6.55707e-09	1.27832	0.048516	0.237455	1.13792	0.1864
8950			level4	Carfentrazone	16.4612717304334	385.152	287.8	POS										5.44078e-09	2.01001e-07	6.14832e-09	7.08633e-08	5.30114e-07	8.34003e-07	9.41689e-07	7.68602e-07	1.29352	0.00745368	0.137109	10.8463	3.43913
8960			level4			899.389	287.8	POS										1.02168e-05	8.41858e-06	6.74327e-06	8.45956e-06	1.86796e-06	3.99128e-06	1.63513e-06	2.49812e-06	1.41769	0.00889798	0.143605	0.295302	-1.75974
8988			level4			684.343	287.7	POS										9.92681e-06	8.73945e-06	6.39433e-06	8.35353e-06	1.9736e-06	1.17289e-06	1.94599e-06	1.69749e-06	1.50313	0.00340582	0.109408	0.203207	-2.29898
9000			level4			199.168	287.6	POS										1.17679e-06	1.24234e-06	1.45323e-06	1.29078e-06	1.50292e-06	1.75582e-06	1.61053e-06	1.62309e-06	1.29653	0.0402042	0.23633	1.25745	0.330497
9003			level4			423.168	287.6	POS										1.11401e-06	2.3551e-06	3.18698e-07	1.26261e-06	4.60939e-06	5.66318e-06	3.25277e-06	4.50845e-06	1.20646	0.023882	0.197941	3.57075	1.83623
9004			level4			459.348	287.6	POS										6.20766e-06	9.30557e-06	1.00777e-05	8.5303e-06	2.71027e-05	1.51201e-05	3.66565e-05	2.62931e-05	1.36989	0.0487578	0.23788	3.08232	1.62402
9005			level4			469.247	287.6	POS										1.34579e-06	2.46191e-06	1.34362e-06	1.71711e-06	8.79793e-06	7.33625e-06	9.26437e-06	8.46618e-06	1.50242	0.000611965	0.0673426	4.93048	2.30173
9009			level4			525.332	287.6	POS										4.00884e-07	7.03327e-07	6.30464e-07	5.78225e-07	1.57381e-06	1.46135e-06	2.40204e-06	1.8124e-06	1.44547	0.0164347	0.17492	3.13442	1.6482
9022			level4			523.325	287.5	POS										5.95386e-06	1.53456e-05	1.24502e-05	1.12499e-05	2.65781e-05	1.99982e-05	3.36313e-05	2.67358e-05	1.27387	0.0324423	0.220848	2.37654	1.24887
9023			level4	Dichloromethotrexate	-16.1974280090851	524.329	287.5	POS										1.95344e-06	5.26466e-06	3.63656e-06	3.61822e-06	9.35346e-06	6.71747e-06	1.01999e-05	8.75695e-06	1.29441	0.022326	0.194283	2.42024	1.27515
9026			level4			706.315	287.5	POS										6.60554e-06	5.17867e-06	3.44599e-06	5.07673e-06	6.85906e-09	6.19632e-09	6.49607e-07	2.20887e-07	1.32607	0.00662887	0.131961	0.0435098	-4.52252
9029			level4			798.362	287.5	POS										5.45956e-06	1.123e-05	1.82976e-05	1.16624e-05	5.90252e-05	3.93091e-05	4.62622e-05	4.81988e-05	1.40563	0.0059934	0.127623	4.13285	2.04714
9033			level4	(2R,4S)-6-Fluoro-2-methylspiro[2,3-dihydrochromene-4,5'-imidazolidine]-2',4'-dione	-1.10538746522159	251.236	287.4	POS										6.59557e-06	1.94888e-05	8.4402e-06	1.15082e-05	5.17961e-05	3.59596e-05	4.32941e-05	4.36832e-05	1.39808	0.00617299	0.128938	3.79584	1.92442
9039			level4			748.479	287.4	POS										5.44078e-09	5.69788e-09	6.14832e-09	5.76233e-09	6.85906e-09	6.19632e-09	6.61583e-09	6.55707e-09	1.27832	0.048516	0.237455	1.13792	0.1864
9049			level4			677.306	287.3	POS										5.44078e-09	5.69788e-09	6.14832e-09	5.76233e-09	6.85906e-09	6.19632e-09	6.61583e-09	6.55707e-09	1.27832	0.048516	0.237455	1.13792	0.1864
9054			level4	Formothion	13.3067721341835	258.278	287.2	POS										1.86888e-05	1.07018e-05	2.22273e-05	1.7206e-05	3.24592e-06	1.60137e-06	5.78969e-07	1.80875e-06	1.41762	0.0116542	0.156976	0.105124	-3.24984
9055			level4	5-Fluorouridine monophosphate	-12.7906545164329	343.175	287.2	POS										1.65443e-06	5.36745e-06	1.31357e-06	2.77848e-06	1.22564e-05	1.29578e-05	1.46805e-05	1.32982e-05	1.38402	0.00209405	0.0947714	4.78614	2.25886
9064			level4			227.161	287.1	POS										4.71979e-06	6.633e-06	5.40521e-06	5.586e-06	9.6963e-06	9.18992e-06	1.00386e-05	9.64159e-06	1.45756	0.00268213	0.102387	1.72603	0.787455
9066			level4	2,3-Diketo-5-methylthiopentyl-1-phosphate	2.16114262257847	243.195	287.1	POS										4.88818e-06	6.55204e-06	4.62934e-06	5.35652e-06	1.50371e-05	9.96622e-06	1.11195e-05	1.20409e-05	1.43962	0.0154182	0.17164	2.2479	1.16858
9067			level4	Muramic acid	-7.07150072971027	252.239	287.1	POS										8.71428e-07	3.0213e-06	1.11827e-06	1.67033e-06	8.52002e-06	7.01021e-06	7.18101e-06	7.57041e-06	1.40543	0.00207103	0.0944685	4.53228	2.18024
9073			level4	1,2,3,4-Tetrahydro-alpha,7-dihydroxy-beta-(hydroxymethyl)-9-methoxy-3,4-dioxocyclopenta[c][1]benzopyran-6-propal	-7.97176949683979	349.309	287.1	POS										4.29623e-06	0.000110887	9.3553e-06	4.15127e-05	0.000172882	0.000351897	0.000219618	0.000248132	1.23268	0.0318212	0.219568	5.97726	2.57948
9077			level4			387.252	287.1	POS										4.74103e-07	7.49216e-07	5.62342e-07	5.9522e-07	1.4614e-06	1.79819e-06	1.70078e-06	1.65345e-06	1.49274	0.00119612	0.0808452	2.77789	1.47399
9079			level4			412.25	287.1	POS										6.4068e-06	3.93899e-06	4.62647e-06	4.99075e-06	1.31184e-06	3.39778e-06	2.21551e-06	2.30838e-06	1.24792	0.0478783	0.237455	0.462531	-1.11238
9085			level4	(2,3-Dihydroxybenzoyl)adenylate	-12.3655643674049	484.327	287.1	POS										7.01753e-07	5.69788e-09	4.41745e-07	3.83065e-07	2.32101e-06	2.18773e-06	1.35503e-06	1.95459e-06	1.05128	0.0124871	0.16047	5.1025	2.3512
9091			level4			594.361	287.1	POS										5.44078e-09	5.69788e-09	6.14832e-09	5.76233e-09	6.85906e-09	6.19632e-09	6.61583e-09	6.55707e-09	1.27832	0.048516	0.237455	1.13792	0.1864
9109			level4			814.526	287.1	POS										5.44078e-09	5.69788e-09	6.14832e-09	5.76233e-09	6.85906e-09	6.19632e-09	6.61583e-09	6.55707e-09	1.27832	0.048516	0.237455	1.13792	0.1864
9110			level4			815.362	287.1	POS										3.52155e-07	3.50679e-06	1.90058e-06	1.91984e-06	1.22034e-05	8.48798e-06	9.11933e-06	9.93689e-06	1.27529	0.00542855	0.123887	5.17589	2.37181
9111			level4	Nitro 2-acetyloxybenzoate	-22.547034056493	226.158	287	POS										3.28043e-05	4.38493e-05	3.95232e-05	3.87256e-05	6.60798e-05	5.76077e-05	5.92727e-05	6.09868e-05	1.43828	0.00572018	0.125663	1.57484	0.655209
9116			level4	CDP-N-methylethanolamine	23.6706914613099	458.267	287	POS										1.62947e-06	2.31641e-05	1.37467e-06	8.72274e-06	7.28848e-05	3.85858e-05	0.000105136	7.22022e-05	1.28673	0.0364834	0.229605	8.27747	3.04919
9119			level4			483.327	287	POS										6.07497e-06	2.95854e-06	4.78897e-06	4.60749e-06	1.7473e-05	1.39339e-05	1.19419e-05	1.44496e-05	1.44711	0.00603988	0.127831	3.13611	1.64897
9124			level4			594.217	287	POS										1.34982e-05	4.73771e-06	8.38127e-06	8.87238e-06	1.61245e-06	1.73417e-06	4.53794e-07	1.2668e-06	1.37859	0.0417412	0.237455	0.142781	-2.80813
9133			level4			195.065	286.9	POS										3.33776e-06	3.22845e-06	4.21576e-06	3.59399e-06	5.33491e-06	4.26645e-06	5.34939e-06	4.98358e-06	1.3006	0.0431774	0.237455	1.38664	0.471597
9140			level4			523.159	286.9	POS										4.0953e-06	2.80732e-06	2.04334e-06	2.98199e-06	6.79488e-06	6.97522e-06	6.0018e-06	6.59063e-06	1.38794	0.00572241	0.125663	2.21015	1.14414
9143			level4			681.317	286.9	POS										5.31427e-06	6.1643e-06	7.02599e-06	6.16819e-06	9.74773e-06	1.00906e-05	1.43584e-05	1.13989e-05	1.40537	0.0286704	0.211005	1.84802	0.885977
9153			level4			583.182	286.8	POS										1.2873e-06	7.80523e-07	4.13233e-07	8.27017e-07	1.59299e-06	1.61853e-06	2.36601e-06	1.85918e-06	1.21591	0.0450318	0.237455	2.24805	1.16867
9158			level4	P1,P4-Bis(5'-guanosyl) tetraphosphate	-17.3616381105373	869.378	286.8	POS										1.527e-05	8.53043e-06	9.02014e-06	1.09402e-05	6.85906e-09	3.43037e-07	6.61583e-09	1.18837e-07	1.43264	0.0376087	0.231907	0.0108625	-6.5245
9164			level4			647.298	286.7	POS										5.44078e-09	5.69788e-09	6.14832e-09	5.76233e-09	6.85906e-09	6.19632e-09	6.61583e-09	6.55707e-09	1.27832	0.048516	0.237455	1.13792	0.1864
9171			level4			457.366	286.6	POS										2.15251e-06	4.77874e-06	4.56937e-06	3.83354e-06	8.17109e-06	6.40205e-06	9.28155e-06	7.95156e-06	1.26624	0.02572	0.203631	2.07421	1.05256
9173			level4			613.423	286.6	POS										5.44078e-09	1.35264e-07	1.21097e-07	8.72673e-08	7.29069e-07	1.07806e-06	4.52292e-07	7.53141e-07	1.22352	0.0230312	0.196259	8.63027	3.10941
9183			level4			696.322	286.5	POS										8.62068e-06	4.59981e-06	3.30379e-06	5.50809e-06	1.36686e-06	1.07739e-06	6.61583e-09	8.16952e-07	1.04965	0.0469836	0.237455	0.148319	-2.75323
9185			level4			785.35	286.5	POS										2.88099e-05	7.33847e-05	5.59608e-05	5.27184e-05	0.00011684	9.226e-05	0.000102142	0.000103747	1.23204	0.0261336	0.204615	1.96795	0.976694
9186			level4			80.5924	286.4	POS										8.80308e-07	5.77441e-07	7.02462e-07	7.2007e-07	6.85906e-09	3.1931e-07	6.61583e-09	1.10928e-07	1.24484	0.0110817	0.154271	0.154052	-2.69851
9193			level4	inosine pyruvate	14.5543875415211	339.288	286.4	POS										1.52452e-05	4.16276e-05	2.15879e-05	2.61536e-05	0.000100706	7.69862e-05	9.11747e-05	8.96221e-05	1.40763	0.00380682	0.112629	3.42677	1.77685
9195			level4	Sucrose	-3.43737081742865	343.303	286.4	POS										7.50957e-06	3.12857e-06	1.77998e-06	4.13937e-06	1.17375e-05	1.10817e-05	1.22027e-05	1.1674e-05	1.2743	0.0128319	0.161596	2.82023	1.49581
[truncated: 11,589 more rows]

## Sheet: HYZ50R_ControlvsHYZ50R_Treatmen
ID	MS2 name	MS2 score	level	MS1 name	MS1 ppm	mz	rt	type	Formula	HMDB	CAS	KEGG COMPOUND ID	Super.Class	Superclass.Chinese	Class	Class.Chinese	Sub.Class	INCHIKEY	HYZ50R_Control_2	HYZ50R_Control_4	HYZ50R_Control_5	MEAN HYZ50R_Control	HYZ50R_Treatmen_1	HYZ50R_Treatmen_2	HYZ50R_Treatmen_6	MEAN HYZ50R_Treatmen	VIP	P-Value	Q-Value	Fold_Change	Log_Foldchange
[truncated: 9,577 more rows]
